# Supplementary material for: The Ryerson Audio-Visual Database of Emotional Speech and Song (RAVDESS): A dynamic, multimodal set of facial and vocal expressions in North American English
Source: PLoS One. 2018 May 16;13(5):e0196391. doi: 10.1371/journal.pone.0196391 (PMC5955500; doi:10.1371/journal.pone.0196391)
Supplement: S1 Table — Proportion correct scores, unbiased hit rates, intensity ratings, genuineness ratings, their respective response times, and goodness scores, for all 7356 RAVDESS stimuli. (XLSX) [file pone.0196391.s004.xlsx]

## Sheet: Speech
	Independent Variables							Dependent Variables
Filename	Modality	Channel	Emotion	Intensity	Statement	Repetition	Actor	PropCorr	UHR	Intensity(Med)	Intensity(M)	Intensity(SD)	Genuineness(Med)	Genuineness(M)	Genuineness(SD)	Goodness	EmoCategoryRespTime(M, Sec)	EmoCategoryRespTime(SD)	IntensityRespTime(M, Sec)	IntensityRespTime(SD)	GenuinenessRespTime(M, Sec)	GenuinenessRespTime(SD)	FileDuration(Sec)
01-01-01-01-01-01-01.mp4	AV	Speech	Neutral	Normal	Kids	R1	A1	0.9	0.619379	3	2.9	0.994429	4	3.7	1.1595	9	1.92804	1.71695	2.02962	1.13571	0.791142	0.713637	3.30329
01-01-01-01-01-01-02.mp4	AV	Speech	Neutral	Normal	Kids	R1	A2	0.9	0.619379	4	3.7	1.25167	4	3.9	0.737865	9	2.47042	2.31644	1.51001	0.690622	0.990143	0.991081	3.63696
01-01-01-01-01-01-03.mp4	AV	Speech	Neutral	Normal	Kids	R1	A3	1	0.688199	3.5	3.6	0.966092	4	3.9	1.1005	10	2.12725	1.9518	2.02469	1.45243	1.65436	1.25754	3.43677
01-01-01-01-01-01-04.mp4	AV	Speech	Neutral	Normal	Kids	R1	A4	1	0.688199	2.5	2.6	1.17379	3	3.1	1.19722	10	1.63626	0.923498	1.72953	1.07469	0.963132	1.04718	3.30329
01-01-01-01-01-01-05.mp4	AV	Speech	Neutral	Normal	Kids	R1	A5	1	0.688199	4	3.7	1.49443	3.5	3.5	1.58114	10	1.25396	0.838724	2.12147	1.47923	1.29117	0.839753	3.6036
01-01-01-01-01-01-06.mp4	AV	Speech	Neutral	Normal	Kids	R1	A6	0.8	0.550559	3.5	3.3	1.33749	3.5	3.4	1.26491	8	1.88838	2.65092	2.04238	1.74786	1.16026	1.28975	3.33667
01-01-01-01-01-01-07.mp4	AV	Speech	Neutral	Normal	Kids	R1	A7	0.9	0.619379	3	3.5	0.849837	3	3.1	1.37032	9	1.28242	0.800771	1.26683	0.764507	1.14584	0.843779	3.90392
01-01-01-01-01-01-08.mp4	AV	Speech	Neutral	Normal	Kids	R1	A8	0.9	0.619379	4	3.7	1.33749	4	3.9	0.994429	9	1.71722	1.52065	1.6203	0.972885	1.43652	1.35206	3.5035
01-01-01-01-01-01-09.mp4	AV	Speech	Neutral	Normal	Kids	R1	A9	0.9	0.619379	4	3.5	1.2693	3	3.1	1.28668	9	2.40938	1.86205	1.54733	0.935823	0.707116	0.487796	3.26994
01-01-01-01-01-01-10.mp4	AV	Speech	Neutral	Normal	Kids	R1	A10	0.8	0.550559	3	2.9	1.37032	3.5	3.8	1.13529	8	1.39715	0.826228	2.45964	1.33923	0.996523	0.580799	3.53688
01-01-01-01-01-01-11.mp4	AV	Speech	Neutral	Normal	Kids	R1	A11	0.9	0.619379	3.5	3.3	1.76698	4	3.3	1.82878	9	1.60754	1.82319	0.969913	0.535955	0.876813	0.843858	3.13648
01-01-01-01-01-01-12.mp4	AV	Speech	Neutral	Normal	Kids	R1	A12	1	0.688199	3.5	3.3	1.25167	3.5	3.5	1.2693	10	1.70608	1.56243	1.7912	1.22967	1.11747	0.91003	3.63696
01-01-01-01-01-01-13.mp4	AV	Speech	Neutral	Normal	Kids	R1	A13	1	0.688199	4.5	4	1.33333	4	3.8	1.31656	10	1.28677	1.19419	1.21916	0.701849	0.804608	0.660495	3.16983
01-01-01-01-01-01-14.mp4	AV	Speech	Neutral	Normal	Kids	R1	A14	0.7	0.481739	3.5	3.2	1.61933	4	3.6	1.50555	7	1.50757	0.738886	1.91039	1.87024	0.833859	0.736319	3.47012
01-01-01-01-01-01-15.mp4	AV	Speech	Neutral	Normal	Kids	R1	A15	0.9	0.619379	3.5	3.1	1.37032	3.5	3.3	1.41814	9	0.784278	0.351868	1.1597	0.843077	0.77295	0.839247	3.37004
01-01-01-01-01-01-16.mp4	AV	Speech	Neutral	Normal	Kids	R1	A16	0.7	0.481739	3.5	3.4	1.17379	3	3.3	1.05935	7	2.02038	2.25997	1.55547	0.889707	0.90839	0.897897	3.73706
01-01-01-01-01-01-17.mp4	AV	Speech	Neutral	Normal	Kids	R1	A17	0.8	0.550559	4	3.4	1.17379	3.5	3.3	1.1595	8	2.24038	2.15437	2.30236	1.67214	0.957999	0.716097	3.83717
01-01-01-01-01-01-18.mp4	AV	Speech	Neutral	Normal	Kids	R1	A18	0.7	0.481739	3	3.3	1.63639	2.5	2.6	1.42984	7	2.16893	2.31348	1.53832	0.930883	1.08861	0.928545	3.47015
01-01-01-01-01-01-19.mp4	AV	Speech	Neutral	Normal	Kids	R1	A19	1	0.688199	3	3.2	1.31656	3	3.4	1.07497	10	1.66979	0.976903	1.65874	1.60334	0.959495	0.656946	3.37004
01-01-01-01-01-01-20.mp4	AV	Speech	Neutral	Normal	Kids	R1	A20	0.7	0.481739	3	3.3	1.41814	4	3.8	0.788811	7	1.58845	1.65605	1.73707	1.86795	0.605675	0.628354	3.47012
01-01-01-01-01-01-21.mp4	AV	Speech	Neutral	Normal	Kids	R1	A21	0.8	0.550559	3.5	3.3	1.49443	3.5	3.6	0.966092	8	2.01333	1.30925	1.6518	1.08094	2.11292	1.53489	3.83717
01-01-01-01-01-01-22.mp4	AV	Speech	Neutral	Normal	Kids	R1	A22	0.7	0.481739	2	2	0.942809	2	2.2	1.0328	7	2.31438	1.72247	1.48183	0.964176	1.4915	1.01958	3.63698
01-01-01-01-01-01-23.mp4	AV	Speech	Neutral	Normal	Kids	R1	A23	1	0.688199	4	3.6	1.42984	4.5	4.1	1.19722	10	2.08427	1.88516	2.05946	1.77561	1.11917	1.28523	3.80379
01-01-01-01-01-01-24.mp4	AV	Speech	Neutral	Normal	Kids	R1	A24	0.9	0.619379	3	3	1.33333	3	3.1	1.44914	9	1.74693	1.17827	1.50876	0.771856	0.657411	0.746593	3.70371
01-01-01-01-01-02-01.mp4	AV	Speech	Neutral	Normal	Kids	R2	A1	1	0.688199	4	3.3	1.41814	4	3.9	1.1005	10	1.27413	1.11433	1.30142	0.847638	1.02099	0.502747	3.33667
01-01-01-01-01-02-02.mp4	AV	Speech	Neutral	Normal	Kids	R2	A2	0.9	0.619379	3	3.3	1.1595	4	3.9	1.28668	9	1.56938	1.21593	1.68072	0.831345	0.85891	0.631552	3.6036
01-01-01-01-01-02-03.mp4	AV	Speech	Neutral	Normal	Kids	R2	A3	0.9	0.619379	2	2.3	1.25167	3	2.7	1.41814	9	2.08404	2.03574	2.01386	0.737304	1.23978	0.89704	3.5035
01-01-01-01-01-02-04.mp4	AV	Speech	Neutral	Normal	Kids	R2	A4	1	0.688199	3.5	3.7	1.25167	4	4	0.816497	10	1.25555	0.450447	2.3078	1.51209	1.15887	0.861065	3.37004
01-01-01-01-01-02-05.mp4	AV	Speech	Neutral	Normal	Kids	R2	A5	0.9	0.619379	4	3.3	1.05935	3	3.1	0.737865	9	2.07418	1.60244	2.02116	1.90851	1.01035	0.756292	3.63698
01-01-01-01-01-02-06.mp4	AV	Speech	Neutral	Normal	Kids	R2	A6	0.9	0.619379	3	2.7	1.41814	3	3.2	1.39841	9	3.12813	2.48676	2.38322	1.65548	1.49486	1.23339	3.6036
01-01-01-01-01-02-07.mp4	AV	Speech	Neutral	Normal	Kids	R2	A7	0.8	0.550559	3	3	1.56347	3	2.6	1.07497	8	1.502	0.575328	1.8752	1.74632	0.696402	0.605336	3.80381
01-01-01-01-01-02-08.mp4	AV	Speech	Neutral	Normal	Kids	R2	A8	1	0.688199	5	3.9	1.66333	4.5	4.1	1.28668	10	2.0375	1.19318	1.46752	1.33904	0.827293	1.04777	3.63698
01-01-01-01-01-02-09.mp4	AV	Speech	Neutral	Normal	Kids	R2	A9	0.7	0.481739	3	2.9	1.79196	4	3.4	1.57762	7	3.0405	2.28983	1.09277	0.561555	1.69287	1.39694	3.20321
01-01-01-01-01-02-10.mp4	AV	Speech	Neutral	Normal	Kids	R2	A10	0.9	0.619379	3	2.9	1.28668	3.5	3.1	1.52388	9	1.82571	1.5836	1.32608	1.41638	1.20894	1.22628	3.83717
01-01-01-01-01-02-11.mp4	AV	Speech	Neutral	Normal	Kids	R2	A11	0.9	0.619379	3	3.1	1.19722	3	3	1.05409	9	1.79994	1.38698	1.68447	0.979596	1.35044	1.14413	3.1031
01-01-01-01-01-02-12.mp4	AV	Speech	Neutral	Normal	Kids	R2	A12	1	0.688199	3	2.9	1.37032	3	3	1.24722	10	1.48467	0.802964	1.33252	0.752728	0.708163	0.583866	3.53688
01-01-01-01-01-02-13.mp4	AV	Speech	Neutral	Normal	Kids	R2	A13	1	0.688199	3	2.9	1.44914	4	3.9	1.1005	10	1.12583	1.05156	0.713754	0.457408	0.625194	0.61917	3.20319
01-01-01-01-01-02-14.mp4	AV	Speech	Neutral	Normal	Kids	R2	A14	0.6	0.41292	2	2.6	0.843274	4	3.4	1.50555	6	3.21942	2.17118	1.60286	1.04365	1.16253	0.546187	3.33667
01-01-01-01-01-02-15.mp4	AV	Speech	Neutral	Normal	Kids	R2	A15	0.8	0.550559	3	3	1.24722	3	3.5	0.707107	8	1.2492	0.671826	1.5701	0.996697	1.21855	1.12812	3.43677
01-01-01-01-01-02-16.mp4	AV	Speech	Neutral	Normal	Kids	R2	A16	0.7	0.481739	3	3.3	1.41814	3.5	3.3	1.41814	7	1.21951	1.09878	1.68115	1.77555	0.659297	0.67366	3.73708
01-01-01-01-01-02-17.mp4	AV	Speech	Neutral	Normal	Kids	R2	A17	0.8	0.550559	2.5	2.6	1.57762	2.5	2.8	1.39841	8	2.08257	1.40433	1.49667	0.951168	0.546855	0.605542	3.5035
01-01-01-01-01-02-18.mp4	AV	Speech	Neutral	Normal	Kids	R2	A18	1	0.688199	3.5	3.2	1.68655	1	1.9	1.37032	10	1.39748	0.508745	1.36434	1.12017	0.856897	0.371155	3.53688
01-01-01-01-01-02-19.mp4	AV	Speech	Neutral	Normal	Kids	R2	A19	0.8	0.550559	2.5	2.6	1.42984	3	2.6	1.3499	8	2.14303	1.41642	1.57467	1.27819	0.897202	0.575493	3.23656
01-01-01-01-01-02-20.mp4	AV	Speech	Neutral	Normal	Kids	R2	A20	1	0.688199	5	4.2	1.13529	4	3.9	1.1005	10	2.14813	2.3518	1.56956	0.922089	1.21751	0.857973	3.57023
01-01-01-01-01-02-21.mp4	AV	Speech	Neutral	Normal	Kids	R2	A21	0.8	0.550559	3.5	3.3	1.1595	3	3.4	1.17379	8	1.26857	0.728914	1.97472	1.36432	0.846497	0.704416	3.97063
01-01-01-01-01-02-22.mp4	AV	Speech	Neutral	Normal	Kids	R2	A22	1	0.688199	3.5	3.6	0.966092	4	3.9	0.737865	10	1.33024	1.26859	1.09086	0.548376	0.926088	1.08825	3.43677
01-01-01-01-01-02-23.mp4	AV	Speech	Neutral	Normal	Kids	R2	A23	1	0.688199	3.5	3.6	0.699206	3	3.2	1.0328	10	1.19795	0.363176	1.78959	1.57892	0.514103	0.363609	3.73706
01-01-01-01-01-02-24.mp4	AV	Speech	Neutral	Normal	Kids	R2	A24	0.8	0.550559	3.5	3.5	1.35401	4	3.4	1.57762	8	2.54091	2.03681	2.40454	0.957431	1.98097	1.40696	3.63696
01-01-01-01-02-01-01.mp4	AV	Speech	Neutral	Normal	Dogs	R1	A1	1	0.688199	3.5	3.6	0.966092	4	4.3	0.674949	10	2.35413	1.21491	2.22681	1.74332	1.24508	0.9668	3.26992
01-01-01-01-02-01-02.mp4	AV	Speech	Neutral	Normal	Dogs	R1	A2	0.9	0.619379	2.5	2.9	1.52388	3	3.1	1.28668	9	1.15279	0.973563	1.48752	1.07161	1.13452	0.872276	3.77042
01-01-01-01-02-01-03.mp4	AV	Speech	Neutral	Normal	Dogs	R1	A3	0.5	0.3441	3	2.7	1.41814	3	3	0.816497	5	2.31057	1.35335	1.45175	0.65896	1.84685	1.1877	3.5035
01-01-01-01-02-01-04.mp4	AV	Speech	Neutral	Normal	Dogs	R1	A4	1	0.688199	4	3.6	1.3499	4	3.6	1.07497	10	1.907	1.69892	1.89937	0.889992	1.56048	0.926388	3.26994
01-01-01-01-02-01-05.mp4	AV	Speech	Neutral	Normal	Dogs	R1	A5	1	0.688199	4	3.2	1.39841	4	3.8	1.22927	10	1.41066	1.74004	1.39044	0.913928	1.00874	0.708623	3.10308
01-01-01-01-02-01-06.mp4	AV	Speech	Neutral	Normal	Dogs	R1	A6	0.9	0.619379	2.5	2.6	1.42984	2.5	2.8	0.918937	9	2.16309	2.64125	1.8769	1.61819	1.12431	0.865217	3.4034
01-01-01-01-02-01-07.mp4	AV	Speech	Neutral	Normal	Dogs	R1	A7	0.8	0.550559	3	3	1.41421	3	3	1.33333	8	2.21956	1.29826	1.96362	0.966204	1.17145	0.855798	4.13746
01-01-01-01-02-01-08.mp4	AV	Speech	Neutral	Normal	Dogs	R1	A8	0.9	0.619379	4	3.2	1.61933	3.5	3.4	1.50555	9	1.60547	1.0674	2.18252	1.15408	1.07215	0.525269	3.53685
01-01-01-01-02-01-09.mp4	AV	Speech	Neutral	Normal	Dogs	R1	A9	0.9	0.619379	3.5	3.3	1.70294	4	3.2	1.39841	9	2.51156	2.14909	1.95262	1.01864	1.11395	0.637162	3.33667
01-01-01-01-02-01-10.mp4	AV	Speech	Neutral	Normal	Dogs	R1	A10	0.9	0.619379	3	3.1	1.1005	2.5	2.4	1.42984	9	1.81873	0.98163	1.30684	0.808011	0.800772	0.494142	3.73706
01-01-01-01-02-01-11.mp4	AV	Speech	Neutral	Normal	Dogs	R1	A11	1	0.688199	4	3.5	1.08012	3.5	3.5	1.17851	10	1.72505	1.40285	1.51599	1.19284	0.77089	0.87135	3.20321
01-01-01-01-02-01-12.mp4	AV	Speech	Neutral	Normal	Dogs	R1	A12	1	0.688199	4	3.3	1.88856	4	3.6	1.64655	10	1.5197	1.28798	1.36523	0.536538	0.898943	1.17779	3.6036
01-01-01-01-02-01-13.mp4	AV	Speech	Neutral	Normal	Dogs	R1	A13	0.9	0.619379	3	2.6	1.17379	2.5	2.8	1.22927	9	1.33639	0.848558	1.14906	0.591463	1.17966	0.720137	3.06973
01-01-01-01-02-01-14.mp4	AV	Speech	Neutral	Normal	Dogs	R1	A14	0.6	0.41292	2	2.4	1.3499	2	2.7	1.41814	6	1.95381	1.16656	1.51505	0.966732	1.20478	0.654738	3.47015
01-01-01-01-02-01-15.mp4	AV	Speech	Neutral	Normal	Dogs	R1	A15	1	0.688199	2.5	2.3	1.05935	2.5	2.6	1.64655	10	1.92328	1.50195	2.27423	2.27212	1.49985	1.17082	3.43675
01-01-01-01-02-01-16.mp4	AV	Speech	Neutral	Normal	Dogs	R1	A16	0.7	0.481739	3	3.3	1.41814	3	3	1.1547	7	3.37956	2.36915	1.60651	0.968645	1.54744	1.1243	3.6036
01-01-01-01-02-01-17.mp4	AV	Speech	Neutral	Normal	Dogs	R1	A17	0.9	0.619379	3	3.1	1.37032	3	3	1.24722	9	2.36047	1.64744	2.5318	1.88698	1.20788	0.963528	3.5035
01-01-01-01-02-01-18.mp4	AV	Speech	Neutral	Normal	Dogs	R1	A18	0.6	0.41292	4.5	3.8	1.47573	3.5	3.4	1.50555	6	1.45497	1.00765	1.02893	0.628054	1.24926	0.978961	3.47012
01-01-01-01-02-01-19.mp4	AV	Speech	Neutral	Normal	Dogs	R1	A19	0.6	0.41292	2.5	2.7	1.56702	4	3.6	0.966092	6	2.37493	1.47243	1.13823	0.560618	1.80283	1.26245	3.33667
01-01-01-01-02-01-20.mp4	AV	Speech	Neutral	Normal	Dogs	R1	A20	1	0.688199	4	3.4	1.3499	4	4	0.666667	10	1.21652	0.922542	1.10157	0.469596	0.88756	0.779158	3.43677
01-01-01-01-02-01-21.mp4	AV	Speech	Neutral	Normal	Dogs	R1	A21	1	0.688199	2.5	2.5	1.50923	3	2.9	1.59513	10	1.44492	0.479341	1.21674	0.792255	1.04995	0.90368	3.6036
01-01-01-01-02-01-22.mp4	AV	Speech	Neutral	Normal	Dogs	R1	A22	1	0.688199	3	3.1	1.28668	3.5	3.4	1.17379	10	2.27328	1.98798	2.90746	1.51547	1.3742	1.43327	3.60358
01-01-01-01-02-01-23.mp4	AV	Speech	Neutral	Normal	Dogs	R1	A23	1	0.688199	3.5	3.6	1.17379	3	3.4	1.3499	10	1.53693	1.11641	2.06536	1.06662	0.794776	0.54417	3.67033
01-01-01-01-02-01-24.mp4	AV	Speech	Neutral	Normal	Dogs	R1	A24	0.9	0.619379	3.5	3.6	0.966092	4	3.7	1.1595	9	1.74849	1.25418	1.04889	0.745127	0.79104	0.615174	3.63698
01-01-01-01-02-02-01.mp4	AV	Speech	Neutral	Normal	Dogs	R2	A1	0.7	0.481739	3	2.8	0.788811	3.5	3.3	1.1595	7	1.76848	1.29601	2.38855	1.6532	0.739262	0.51935	3.16983
01-01-01-01-02-02-02.mp4	AV	Speech	Neutral	Normal	Dogs	R2	A2	0.9	0.619379	4	4.1	0.875595	4	4.2	0.632456	9	1.32567	0.810695	1.28825	0.682893	1.10757	0.830804	3.60358
01-01-01-01-02-02-03.mp4	AV	Speech	Neutral	Normal	Dogs	R2	A3	0.6	0.41292	3	3.2	1.54919	4	3.6	1.57762	6	2.85386	1.37527	1.18962	0.796663	0.823295	0.671413	3.47015
01-01-01-01-02-02-04.mp4	AV	Speech	Neutral	Normal	Dogs	R2	A4	0.8	0.550559	2.5	2.5	1.35401	3	3	1.1547	8	2.30915	2.31937	1.48773	1.11376	1.02893	0.925438	3.23656
01-01-01-01-02-02-05.mp4	AV	Speech	Neutral	Normal	Dogs	R2	A5	0.9	0.619379	3	3.1	1.44914	3	3.4	1.07497	9	2.14561	2.26442	2.4772	1.58679	1.3228	1.34105	3.6036
01-01-01-01-02-02-06.mp4	AV	Speech	Neutral	Normal	Dogs	R2	A6	1	0.688199	3	2.9	1.59513	2	2.4	1.50555	10	1.73749	1.09729	2.23167	1.41391	1.45737	1.16268	3.43677
01-01-01-01-02-02-07.mp4	AV	Speech	Neutral	Normal	Dogs	R2	A7	1	0.688199	3	3.1	1.1005	3	3.4	1.17379	10	1.41506	1.35095	1.64055	1.43358	0.865568	0.992046	3.73706
01-01-01-01-02-02-08.mp4	AV	Speech	Neutral	Normal	Dogs	R2	A8	1	0.688199	4	3.7	1.41814	4.5	3.9	1.44914	10	2.35289	1.68112	1.3386	0.880033	1.27163	1.61194	3.5035
01-01-01-01-02-02-09.mp4	AV	Speech	Neutral	Normal	Dogs	R2	A9	0.9	0.619379	3	3.3	1.33749	3.5	3.5	1.35401	9	2.33354	2.57788	1.14359	0.533293	1.14803	1.03192	3.23658
01-01-01-01-02-02-10.mp4	AV	Speech	Neutral	Normal	Dogs	R2	A10	1	0.688199	3	3.2	1.31656	3	3.2	1.13529	10	1.42424	1.11584	1.36125	1.26554	0.824079	0.569208	3.67033
01-01-01-01-02-02-11.mp4	AV	Speech	Neutral	Normal	Dogs	R2	A11	1	0.688199	4	3.6	1.57762	4.5	3.7	1.63639	10	1.39603	1.00128	1.0615	0.775783	0.37207	0.35652	3.16983
01-01-01-01-02-02-12.mp4	AV	Speech	Neutral	Normal	Dogs	R2	A12	0.9	0.619379	3	3.3	1.49443	3.5	3.4	1.26491	9	1.66119	1.20911	1.11424	0.538437	1.1289	0.575577	3.63698
01-01-01-01-02-02-13.mp4	AV	Speech	Neutral	Normal	Dogs	R2	A13	1	0.688199	4	3.7	1.25167	4	3.6	1.26491	10	1.54544	1.20553	1.77929	1.28199	1.10178	0.78341	3.13646
01-01-01-01-02-02-14.mp4	AV	Speech	Neutral	Normal	Dogs	R2	A14	0.7	0.481739	3	2.8	1.13529	3	3.4	1.3499	7	1.80657	1.23172	2.47368	1.20406	0.912125	0.70422	3.57023
01-01-01-01-02-02-15.mp4	AV	Speech	Neutral	Normal	Dogs	R2	A15	0.9	0.619379	3	3.5	1.2693	3.5	3.6	1.26491	9	2.00796	1.5144	1.21264	0.550572	0.973336	1.27067	3.4034
01-01-01-01-02-02-16.mp4	AV	Speech	Neutral	Normal	Dogs	R2	A16	0.8	0.550559	2.5	2.7	1.33749	4	3.6	0.843274	8	2.21087	1.56816	1.95832	1.61203	1.28828	1.24118	3.57023
01-01-01-01-02-02-17.mp4	AV	Speech	Neutral	Normal	Dogs	R2	A17	0.9	0.619379	4	3.6	1.3499	4	3.5	1.43372	9	1.19993	0.678822	1.56051	1.01968	0.7929	0.570398	3.47012
01-01-01-01-02-02-18.mp4	AV	Speech	Neutral	Normal	Dogs	R2	A18	1	0.688199	2	2.6	1.7127	3	2.9	1.59513	10	1.89228	2.12455	1.51233	1.71428	0.727055	0.53648	3.47015
01-01-01-01-02-02-19.mp4	AV	Speech	Neutral	Normal	Dogs	R2	A19	0.9	0.619379	3	3.2	0.788811	3	3.3	0.948683	9	2.10082	1.32679	2.06562	0.96169	1.37357	1.2618	3.30329
01-01-01-01-02-02-20.mp4	AV	Speech	Neutral	Normal	Dogs	R2	A20	1	0.688199	3.5	3.5	1.35401	3.5	3.6	1.26491	10	1.37974	1.36985	1.03451	0.587085	0.947232	0.946583	3.53688
01-01-01-01-02-02-21.mp4	AV	Speech	Neutral	Normal	Dogs	R2	A21	0.8	0.550559	2	2.2	1.22927	2	2.7	1.49443	8	1.10506	0.605651	1.42543	1.76911	0.561061	0.427056	3.67033
01-01-01-01-02-02-22.mp4	AV	Speech	Neutral	Normal	Dogs	R2	A22	0.9	0.619379	4	3.8	1.0328	4.5	4.1	1.1005	9	2.1746	1.86467	1.48864	1.21598	1.02864	0.862149	3.53685
01-01-01-01-02-02-23.mp4	AV	Speech	Neutral	Normal	Dogs	R2	A23	0.9	0.619379	3	3.2	1.54919	3	3.1	0.994429	9	1.01784	0.811117	0.923473	0.574685	0.97069	0.79568	3.83717
01-01-01-01-02-02-24.mp4	AV	Speech	Neutral	Normal	Dogs	R2	A24	0.9	0.619379	3.5	3.7	1.25167	3.5	3.7	1.33749	9	1.41921	1.42326	1.81138	1.13575	1.06346	1.01661	3.6036
01-01-02-01-01-01-01.mp4	AV	Speech	Calm	Normal	Kids	R1	A1	0.8	0.550559	3.5	3.3	1.05935	4	3.9	0.875595	5.76	2.60935	1.34029	2.12196	1.49884	1.20306	0.8284	3.53685
01-01-02-01-01-01-02.mp4	AV	Speech	Calm	Normal	Kids	R1	A2	1	0.688199	3	3.5	1.08012	3	3.3	1.25167	6.8	1.80036	1.41738	1.95284	1.16092	1.60361	1.57337	3.83717
01-01-02-01-01-01-03.mp4	AV	Speech	Calm	Normal	Kids	R1	A3	0.7	0.481739	3	2.6	1.3499	3	2.6	1.50555	3.64	3.07505	2.11551	1.89656	1.70045	1.03889	0.96157	3.83717
01-01-02-01-01-01-04.mp4	AV	Speech	Calm	Normal	Kids	R1	A4	0.5	0.3441	3.5	3.2	1.0328	4	3.3	1.63639	3.25	2.34189	1.0367	2.38948	1.63541	1.2095	0.818011	3.80379
01-01-02-01-01-01-05.mp4	AV	Speech	Calm	Normal	Kids	R1	A5	0	0	4	3.5	0.971825	3	3.4	1.07497	0	2.51888	1.28848	1.23156	0.715598	1.21476	1.37936	4.03735
01-01-02-01-01-01-06.mp4	AV	Speech	Calm	Normal	Kids	R1	A6	0.9	0.619379	3	2.9	1.19722	3	2.9	1.19722	5.22	1.82851	0.838721	1.40039	1.37526	0.555671	0.469233	4.03735
01-01-02-01-01-01-07.mp4	AV	Speech	Calm	Normal	Kids	R1	A7	0.8	0.550559	3.5	3.3	0.823273	3.5	3.6	0.699206	5.52	2.30857	1.75686	1.69031	1.29979	0.712593	0.773401	3.47012
01-01-02-01-01-01-08.mp4	AV	Speech	Calm	Normal	Kids	R1	A8	1	0.688199	4	3.6	1.17379	4	3.7	1.25167	7.3	1.82829	1.11474	1.71312	1.41382	0.861684	0.986319	3.6036
01-01-02-01-01-01-09.mp4	AV	Speech	Calm	Normal	Kids	R1	A9	0.7	0.481739	4	3.8	1.31656	4.5	3.9	1.37032	5.39	2.91237	2.13501	1.74295	1.36118	0.74881	0.726839	3.33667
01-01-02-01-01-01-10.mp4	AV	Speech	Calm	Normal	Kids	R1	A10	0.3	0.20646	2.5	2.5	1.08012	3.5	3.4	1.07497	1.77	2.12871	0.934973	2.18418	1.8869	1.22679	1.05249	3.57023
01-01-02-01-01-01-11.mp4	AV	Speech	Calm	Normal	Kids	R1	A11	1	0.688199	3.5	3.4	1.57762	3	3.5	1.08012	6.9	2.14229	1.99384	2.5761	1.8669	1.39177	1.03458	3.26992
01-01-02-01-01-01-12.mp4	AV	Speech	Calm	Normal	Kids	R1	A12	1	0.688199	4	3.8	1.22927	4	3.9	1.28668	7.7	1.37097	0.990895	1.00852	0.639103	0.422081	0.259276	3.87052
01-01-02-01-01-01-13.mp4	AV	Speech	Calm	Normal	Kids	R1	A13	0.8	0.550559	3	2.7	1.1595	3	3.4	0.843274	4.88	2.19699	1.39773	1.88692	1.82525	1.47486	1.25236	3.30329
01-01-02-01-01-01-14.mp4	AV	Speech	Calm	Normal	Kids	R1	A14	0.7	0.481739	3	3.5	1.17851	4	3.5	1.2693	4.9	2.89619	1.31396	1.76503	1.04956	0.625783	0.512612	3.73706
01-01-02-01-01-01-15.mp4	AV	Speech	Calm	Normal	Kids	R1	A15	1	0.688199	3.5	3.6	0.699206	4	3.9	0.994429	7.5	1.52642	0.592059	2.00929	1.18739	1.02118	0.525033	3.57025
01-01-02-01-01-01-16.mp4	AV	Speech	Calm	Normal	Kids	R1	A16	0.4	0.27528	4	3.5	1.08012	3	3.1	1.28668	2.64	2.16926	1.03537	1.44738	1.09935	0.745407	0.54744	3.70369
01-01-02-01-01-01-17.mp4	AV	Speech	Calm	Normal	Kids	R1	A17	0.8	0.550559	3	3	0.942809	3	3.3	0.948683	5.04	2.88893	1.62672	1.6932	1.10272	1.4047	1.12011	3.5035
01-01-02-01-01-01-18.mp4	AV	Speech	Calm	Normal	Kids	R1	A18	0.6	0.41292	2.5	2.7	1.33749	3	3.1	1.44914	3.48	2.24677	1.6317	1.68448	0.778635	1.40411	0.698006	3.47012
01-01-02-01-01-01-19.mp4	AV	Speech	Calm	Normal	Kids	R1	A19	0.3	0.20646	3.5	3.5	0.849837	4	4	0.942809	2.25	2.41716	1.20672	2.20644	1.96126	1.1287	0.862459	3.67033
01-01-02-01-01-01-20.mp4	AV	Speech	Calm	Normal	Kids	R1	A20	0.8	0.550559	3.5	3.2	1.0328	4	3.3	1.33749	5.2	1.81273	0.961552	1.25445	1.11732	0.814887	0.521183	3.63696
01-01-02-01-01-01-21.mp4	AV	Speech	Calm	Normal	Kids	R1	A21	0.6	0.41292	2	2.5	1.08012	2	2.5	1.2693	3	2.56236	2.19669	1.96088	1.28739	1.12956	1.1071	4.03737
01-01-02-01-01-01-22.mp4	AV	Speech	Calm	Normal	Kids	R1	A22	1	0.688199	3	2.8	1.31656	3	3.1	1.28668	5.9	1.48236	0.987762	1.70143	1.77571	0.903746	0.725949	3.53685
01-01-02-01-01-01-23.mp4	AV	Speech	Calm	Normal	Kids	R1	A23	1	0.688199	3.5	3.8	1.13529	3.5	3.7	1.05935	7.5	1.5959	1.76536	1.39894	1.41089	0.484963	0.314015	3.97063
01-01-02-01-01-01-24.mp4	AV	Speech	Calm	Normal	Kids	R1	A24	1	0.688199	3.5	3	1.41421	3.5	3.4	1.42984	6.4	2.44209	2.05442	2.17413	1.15801	1.48973	1.43339	3.57023
01-01-02-01-01-02-01.mp4	AV	Speech	Calm	Normal	Kids	R2	A1	1	0.688199	3.5	3.4	0.966092	3	3.5	0.971825	6.9	1.35821	0.663227	2.23555	1.13263	1.26965	1.04545	3.60358
01-01-02-01-01-02-02.mp4	AV	Speech	Calm	Normal	Kids	R2	A2	0.9	0.619379	4	3.4	1.3499	4	3.7	1.1595	6.39	1.46919	1.22361	1.19666	0.544947	1.07998	1.17446	4.004
01-01-02-01-01-02-03.mp4	AV	Speech	Calm	Normal	Kids	R2	A3	0.2	0.13764	3	2.9	0.737865	3	2.8	0.632456	1.14	3.81627	1.95631	2.03399	1.3002	1.08509	0.670238	3.73706
01-01-02-01-01-02-04.mp4	AV	Speech	Calm	Normal	Kids	R2	A4	0	0	3.5	3.5	1.2693	4.5	3.9	1.44914	0	2.02044	1.61631	1.83065	1.25069	1.20932	1.05492	3.73706
01-01-02-01-01-02-05.mp4	AV	Speech	Calm	Normal	Kids	R2	A5	0.7	0.481739	5	4.2	1.0328	4.5	4.1	0.994429	5.81	1.95015	1.60623	1.28041	0.942027	0.948065	1.08139	4.1041
01-01-02-01-01-02-06.mp4	AV	Speech	Calm	Normal	Kids	R2	A6	0.9	0.619379	4	3.7	0.823273	3.5	3.4	0.966092	6.39	2.18484	1.19421	2.36033	1.52831	1.23791	1.00682	4.1041
01-01-02-01-01-02-07.mp4	AV	Speech	Calm	Normal	Kids	R2	A7	0.7	0.481739	3.5	3.5	1.35401	3	3.2	1.47573	4.69	1.72173	1.40256	1.3465	0.946146	1.3234	0.810473	3.73706
01-01-02-01-01-02-08.mp4	AV	Speech	Calm	Normal	Kids	R2	A8	0.6	0.41292	3	3	1.33333	4	3.8	0.918937	4.08	1.94858	0.609942	1.63244	0.808664	1.11011	0.736071	3.40342
01-01-02-01-01-02-09.mp4	AV	Speech	Calm	Normal	Kids	R2	A9	0.9	0.619379	3	3.4	0.843274	4	4.1	0.737865	6.75	1.71532	0.872308	1.75993	1.13896	0.975863	0.946808	3.33667
01-01-02-01-01-02-10.mp4	AV	Speech	Calm	Normal	Kids	R2	A10	0.7	0.481739	4	3.3	0.948683	3.5	3.5	1.08012	4.76	2.47067	1.75111	2.32709	1.49705	0.853575	0.563726	3.60358
01-01-02-01-01-02-11.mp4	AV	Speech	Calm	Normal	Kids	R2	A11	0.7	0.481739	3	3.1	1.1005	3	3.5	0.707107	4.62	2.63007	2.32183	0.801596	0.3295	0.680256	0.423017	3.33667
01-01-02-01-01-02-12.mp4	AV	Speech	Calm	Normal	Kids	R2	A12	0.8	0.550559	4	3.7	1.25167	4	3.7	1.1595	5.92	2.03274	1.29072	2.0705	1.73546	1.44428	0.771399	3.77042
01-01-02-01-01-02-13.mp4	AV	Speech	Calm	Normal	Kids	R2	A13	0.8	0.550559	2	2.3	0.948683	3	2.8	1.31656	4.08	1.94388	1.3797	2.00554	1.49448	1.41912	1.09687	3.16983
01-01-02-01-01-02-14.mp4	AV	Speech	Calm	Normal	Kids	R2	A14	0.8	0.550559	3	3.1	0.994429	3	3.3	0.823273	5.12	2.85196	2.21309	2.12367	1.1993	1.4	0.89836	3.57023
01-01-02-01-01-02-15.mp4	AV	Speech	Calm	Normal	Kids	R2	A15	0.7	0.481739	3	2.7	1.05935	3.5	3.4	1.42984	4.27	1.64285	0.985944	1.27056	0.844531	0.972092	0.732061	3.57023
01-01-02-01-01-02-16.mp4	AV	Speech	Calm	Normal	Kids	R2	A16	0.5	0.3441	4	3.4	1.17379	4	3.6	1.3499	3.5	1.7246	1.57866	1.66082	1.10667	1.05462	0.990256	3.87052
01-01-02-01-01-02-17.mp4	AV	Speech	Calm	Normal	Kids	R2	A17	0.9	0.619379	3.5	3.1	1.28668	3	2.8	1.47573	5.31	1.62562	1.89028	1.23919	0.566395	0.942231	0.79509	3.53688
01-01-02-01-01-02-18.mp4	AV	Speech	Calm	Normal	Kids	R2	A18	0.8	0.550559	3	3.4	0.843274	4	3.4	1.3499	5.44	2.48378	1.79423	2.14429	1.02319	1.14861	0.716929	3.40342
01-01-02-01-01-02-19.mp4	AV	Speech	Calm	Normal	Kids	R2	A19	0.4	0.27528	4	4	0.666667	4.5	4	1.1547	3.2	1.62766	0.694485	1.86724	1.54504	0.781502	0.479581	3.67033
01-01-02-01-01-02-20.mp4	AV	Speech	Calm	Normal	Kids	R2	A20	0.6	0.41292	3	3	1.49071	3.5	3.7	1.25167	4.02	1.56952	0.826569	1.87017	1.28	1.04881	1.17364	3.57023
01-01-02-01-01-02-21.mp4	AV	Speech	Calm	Normal	Kids	R2	A21	1	0.688199	4	3.6	0.843274	3	3.3	0.674949	6.9	1.60975	0.717393	1.77473	1.23646	0.876158	0.98557	4.004
01-01-02-01-01-02-22.mp4	AV	Speech	Calm	Normal	Kids	R2	A22	1	0.688199	3.5	3.3	0.823273	3.5	3.3	0.948683	6.6	2.01537	1.11214	2.01795	1.73977	1.36154	1.44383	3.57023
01-01-02-01-01-02-23.mp4	AV	Speech	Calm	Normal	Kids	R2	A23	1	0.688199	3	3.4	0.843274	3	3.7	0.948683	7.1	2.14401	1.26821	2.40853	1.69772	1.39395	1.37152	4.07073
01-01-02-01-01-02-24.mp4	AV	Speech	Calm	Normal	Kids	R2	A24	0.4	0.27528	3	3.1	1.66333	3	2.9	1.59513	2.4	2.09829	1.48424	1.9631	1.35069	1.11197	0.538903	3.5035
01-01-02-01-02-01-01.mp4	AV	Speech	Calm	Normal	Dogs	R1	A1	0.8	0.550559	3.5	3.4	1.07497	4	3.8	1.0328	5.76	1.80666	0.742127	1.48506	0.333731	1.72534	1.15551	3.5035
01-01-02-01-02-01-02.mp4	AV	Speech	Calm	Normal	Dogs	R1	A2	0.9	0.619379	3	3.3	1.25167	4	3.7	0.948683	6.3	1.68482	1.58232	1.75791	0.870386	1.18986	1.05293	3.83717
01-01-02-01-02-01-03.mp4	AV	Speech	Calm	Normal	Dogs	R1	A3	0.4	0.27528	3.5	3.5	0.849837	3	2.8	1.54919	2.52	1.86244	0.880775	2.09404	1.24573	0.866226	0.960724	3.83717
01-01-02-01-02-01-04.mp4	AV	Speech	Calm	Normal	Dogs	R1	A4	0.3	0.20646	3	3.2	1.0328	4	3.6	1.26491	2.04	2.16914	1.50413	2.18548	1.69486	1.22618	0.898011	3.63698
01-01-02-01-02-01-05.mp4	AV	Speech	Calm	Normal	Dogs	R1	A5	0.6	0.41292	3.5	3.6	0.966092	4	3.5	0.971825	4.26	2.59093	1.20154	2.1209	1.3235	1.50091	1.27418	4.13748
01-01-02-01-02-01-06.mp4	AV	Speech	Calm	Normal	Dogs	R1	A6	0.9	0.619379	3.5	3.2	1.0328	3	3	0.666667	5.58	1.60409	1.15245	1.24926	0.700976	1.0466	1.42914	3.97063
01-01-02-01-02-01-07.mp4	AV	Speech	Calm	Normal	Dogs	R1	A7	0.8	0.550559	3	3.1	1.19722	3.5	3.7	1.33749	5.44	1.50573	0.717256	2.0785	1.47421	1.40359	1.42698	3.5035
01-01-02-01-02-01-08.mp4	AV	Speech	Calm	Normal	Dogs	R1	A8	0.6	0.41292	3	3.1	1.19722	4	3.6	1.07497	4.02	2.4363	1.70081	2.07978	1.24156	1.26463	0.612744	3.47012
01-01-02-01-02-01-09.mp4	AV	Speech	Calm	Normal	Dogs	R1	A9	1	0.688199	5	3.9	1.52388	4	3.8	1.22927	7.7	2.10348	1.57615	1.74436	0.670749	1.72587	1.27422	3.47015
01-01-02-01-02-01-10.mp4	AV	Speech	Calm	Normal	Dogs	R1	A10	0.5	0.3441	4	3.3	1.25167	3	3.4	0.843274	3.35	1.79612	0.939644	1.33315	0.922377	0.891486	0.733105	3.63696
01-01-02-01-02-01-11.mp4	AV	Speech	Calm	Normal	Dogs	R1	A11	0.8	0.550559	4	3.9	0.875595	4	3.8	0.632456	6.16	1.52074	1.18478	1.441	0.695106	0.705978	0.63662	3.33667
01-01-02-01-02-01-12.mp4	AV	Speech	Calm	Normal	Dogs	R1	A12	0.7	0.481739	3.5	3.4	1.17379	3.5	3.4	0.966092	4.76	1.75154	1.14565	1.70574	0.869658	1.18368	1.28665	3.77044
01-01-02-01-02-01-13.mp4	AV	Speech	Calm	Normal	Dogs	R1	A13	0.7	0.481739	3	3.1	1.37032	3	3.2	0.788811	4.41	1.82	1.67012	1.87361	1.4991	1.49474	1.43955	3.13646
01-01-02-01-02-01-14.mp4	AV	Speech	Calm	Normal	Dogs	R1	A14	0.8	0.550559	4	3.7	1.1595	3	3.2	1.22927	5.52	1.84267	0.828998	1.73609	1.31113	1.15701	1.32343	3.40342
01-01-02-01-02-01-15.mp4	AV	Speech	Calm	Normal	Dogs	R1	A15	0.9	0.619379	3	3	1.33333	3.5	3.3	1.56702	5.67	1.9711	1.33712	1.75829	1.03064	0.989557	1.27549	3.73706
01-01-02-01-02-01-16.mp4	AV	Speech	Calm	Normal	Dogs	R1	A16	0.6	0.41292	4	3.8	0.918937	4	4.1	0.737865	4.74	2.41034	1.73967	1.58425	0.967014	0.559328	0.370453	3.80379
01-01-02-01-02-01-17.mp4	AV	Speech	Calm	Normal	Dogs	R1	A17	0.9	0.619379	3.5	3.9	0.994429	3	3.2	1.39841	6.39	2.18735	1.91663	1.01974	0.796511	0.798634	0.854594	3.73708
01-01-02-01-02-01-18.mp4	AV	Speech	Calm	Normal	Dogs	R1	A18	0.5	0.3441	3	2.9	0.737865	2.5	2.8	1.22927	2.85	2.70136	1.82883	3.07415	1.74805	1.00742	0.627705	3.63698
01-01-02-01-02-01-19.mp4	AV	Speech	Calm	Normal	Dogs	R1	A19	0.5	0.3441	4	3.9	0.994429	4	4.2	0.788811	4.05	1.54999	1.02411	1.23989	0.688917	0.603863	0.522536	3.33667
01-01-02-01-02-01-20.mp4	AV	Speech	Calm	Normal	Dogs	R1	A20	0.8	0.550559	3	2.8	1.22927	4	3.2	1.61933	4.8	2.13626	1.2872	1.91388	1.4936	1.08247	1.08909	3.33667
01-01-02-01-02-01-21.mp4	AV	Speech	Calm	Normal	Dogs	R1	A21	0.8	0.550559	4	3.4	1.3499	4	3.2	1.61933	5.28	2.33062	1.95722	1.64749	0.743423	1.23921	0.93225	3.80381
01-01-02-01-02-01-22.mp4	AV	Speech	Calm	Normal	Dogs	R1	A22	0.7	0.481739	3	2.7	1.05935	3	3.2	0.918937	4.13	2.06924	1.99869	1.49129	1.0808	1.54152	1.07539	3.57023
01-01-02-01-02-01-23.mp4	AV	Speech	Calm	Normal	Dogs	R1	A23	1	0.688199	3.5	3.2	1.31656	4	3	1.33333	6.2	2.20851	1.4964	2.32326	1.40641	0.859283	0.751488	4.17083
01-01-02-01-02-01-24.mp4	AV	Speech	Calm	Normal	Dogs	R1	A24	0.8	0.550559	2.5	2.6	1.3499	2.5	2.4	1.3499	4	1.72833	0.631441	1.08443	0.666677	0.666196	0.582452	3.87054
01-01-02-01-02-02-01.mp4	AV	Speech	Calm	Normal	Dogs	R2	A1	1	0.688199	3	3.3	0.674949	3.5	3.4	0.966092	6.7	1.91125	1.50417	2.25233	1.57304	1.32995	1.04824	3.47015
01-01-02-01-02-02-02.mp4	AV	Speech	Calm	Normal	Dogs	R2	A2	0.9	0.619379	3	3.4	1.26491	4	3.6	1.50555	6.3	1.87881	1.63816	1.50163	1.4066	0.993367	0.796524	3.97063
01-01-02-01-02-02-03.mp4	AV	Speech	Calm	Normal	Dogs	R2	A3	0.4	0.27528	3.5	3.4	0.966092	3.5	3.4	0.966092	2.72	2.4544	2.21591	1.29504	1.00603	0.509896	0.523754	3.97063
01-01-02-01-02-02-04.mp4	AV	Speech	Calm	Normal	Dogs	R2	A4	0.3	0.20646	4	3.8	0.788811	4	4.1	0.737865	2.37	1.87163	1.09879	1.56387	0.852273	0.729358	0.574778	3.57025
01-01-02-01-02-02-05.mp4	AV	Speech	Calm	Normal	Dogs	R2	A5	0.5	0.3441	4	3.6	1.07497	3	3.3	1.25167	3.45	1.56754	0.767015	1.00271	0.68984	1.10442	0.973339	4.23756
01-01-02-01-02-02-06.mp4	AV	Speech	Calm	Normal	Dogs	R2	A6	1	0.688199	3.5	3.3	1.49443	3.5	3.3	1.33749	6.6	3.34357	2.13277	2.32918	2.14279	1.5209	1.02958	4.20419
01-01-02-01-02-02-07.mp4	AV	Speech	Calm	Normal	Dogs	R2	A7	0.8	0.550559	3.5	3.3	1.33749	3	3.1	1.19722	5.12	1.82313	1.53304	1.53496	1.08992	0.845582	0.5487	3.53688
01-01-02-01-02-02-08.mp4	AV	Speech	Calm	Normal	Dogs	R2	A8	0.7	0.481739	3	3.3	0.948683	4	4	1.1547	5.11	1.88812	0.673607	2.28736	2.14588	1.37544	1.32744	3.47012
01-01-02-01-02-02-09.mp4	AV	Speech	Calm	Normal	Dogs	R2	A9	0.8	0.550559	3	2.9	1.44914	3	3.2	1.31656	4.88	1.17876	0.859426	1.24362	0.897536	0.90677	0.513728	3.57023
01-01-02-01-02-02-10.mp4	AV	Speech	Calm	Normal	Dogs	R2	A10	0.9	0.619379	3	3	0.471405	3	3	1.1547	5.4	2.27008	1.94131	1.6145	0.823921	0.949139	0.659705	3.70371
01-01-02-01-02-02-11.mp4	AV	Speech	Calm	Normal	Dogs	R2	A11	1	0.688199	4	3.3	1.63639	4.5	3.8	1.61933	7.1	2.22163	1.4855	1.42946	1.16564	0.891278	0.746818	3.67033
01-01-02-01-02-02-12.mp4	AV	Speech	Calm	Normal	Dogs	R2	A12	0.7	0.481739	3	3.4	0.516398	4	3.8	0.632456	5.04	1.5071	0.705679	2.90947	1.79844	1.75611	1.13403	3.67033
01-01-02-01-02-02-13.mp4	AV	Speech	Calm	Normal	Dogs	R2	A13	0.8	0.550559	3	3	1.1547	4	4	1.05409	5.6	1.60301	0.813678	2.05115	0.992715	0.932076	0.643535	2.93627
01-01-02-01-02-02-14.mp4	AV	Speech	Calm	Normal	Dogs	R2	A14	0.8	0.550559	3	3.4	0.966092	3.5	3.4	0.966092	5.44	1.36653	0.855893	1.43454	1.86694	0.632029	0.567816	3.5035
01-01-02-01-02-02-15.mp4	AV	Speech	Calm	Normal	Dogs	R2	A15	0.9	0.619379	3	3.3	0.674949	3.5	3.3	1.1595	5.94	1.91811	2.11808	1.18308	0.987143	0.653593	0.533097	3.57023
01-01-02-01-02-02-16.mp4	AV	Speech	Calm	Normal	Dogs	R2	A16	0.5	0.3441	3	2.9	0.875595	4	3.7	1.1595	3.3	3.099	2.12896	2.05254	1.396	1.33755	1.1885	3.67033
01-01-02-01-02-02-17.mp4	AV	Speech	Calm	Normal	Dogs	R2	A17	0.9	0.619379	3.5	3.5	1.35401	3	3	1.24722	5.85	1.62104	2.18403	1.90866	1.76472	1.03327	0.920248	3.77044
01-01-02-01-02-02-18.mp4	AV	Speech	Calm	Normal	Dogs	R2	A18	0.8	0.550559	4	4.2	0.788811	4	3.8	1.0328	6.4	2.31214	1.6169	1.52996	0.759103	0.890788	0.391222	3.5035
01-01-02-01-02-02-19.mp4	AV	Speech	Calm	Normal	Dogs	R2	A19	0.5	0.3441	3	3.4	1.07497	3.5	3.5	1.35401	3.45	1.85614	1.30688	2.00212	1.2287	0.936768	0.698877	3.47012
01-01-02-01-02-02-20.mp4	AV	Speech	Calm	Normal	Dogs	R2	A20	0.6	0.41292	3.5	3.5	1.35401	3	3.1	1.28668	3.96	2.17306	1.74931	2.05433	1.82237	0.713755	0.53875	3.5035
01-01-02-01-02-02-21.mp4	AV	Speech	Calm	Normal	Dogs	R2	A21	0.8	0.550559	2.5	2.9	1.72884	3	3	1.94365	4.72	1.97862	1.28717	1.00767	0.837299	0.559126	0.433647	4.07073
01-01-02-01-02-02-22.mp4	AV	Speech	Calm	Normal	Dogs	R2	A22	0.8	0.550559	3	3.2	1.22927	3	2.7	1.41814	4.72	1.2236	0.505667	2.93746	1.43755	1.26429	0.760662	3.53688
01-01-02-01-02-02-23.mp4	AV	Speech	Calm	Normal	Dogs	R2	A23	1	0.688199	4.5	4.3	0.823273	4	3.8	1.39841	8.1	1.83824	1.25576	2.19408	1.12714	0.806218	0.445631	4.004
01-01-02-01-02-02-24.mp4	AV	Speech	Calm	Normal	Dogs	R2	A24	0.6	0.41292	3	2.9	1.1005	3.5	3.5	0.849837	3.84	2.7117	1.84088	1.52496	0.730613	1.01077	0.765513	3.70369
01-01-02-02-01-01-01.mp4	AV	Speech	Calm	Strong	Kids	R1	A1	0.7	0.481739	4	3.5	1.17851	4	3.5	1.58114	4.9	2.03289	1.46047	1.62997	1.10494	1.11126	1.32491	3.70371
01-01-02-02-01-01-02.mp4	AV	Speech	Calm	Strong	Kids	R1	A2	0.8	0.550559	3	3	0.942809	3	3.4	1.07497	5.12	1.84387	1.81969	1.79991	1.85917	1.27306	0.639279	4.13748
01-01-02-02-01-01-03.mp4	AV	Speech	Calm	Strong	Kids	R1	A3	0.1	0.0688199	3	2.9	0.994429	2	2.4	1.3499	0.53	3.26836	2.66739	1.94133	1.8971	0.908233	0.898177	4.03737
01-01-02-02-01-01-04.mp4	AV	Speech	Calm	Strong	Kids	R1	A4	0.9	0.619379	4	3.7	1.05935	4	3.9	1.19722	6.84	2.20888	1.2481	1.69618	1.65768	0.903997	0.711111	3.97063
01-01-02-02-01-01-05.mp4	AV	Speech	Calm	Strong	Kids	R1	A5	0.4	0.27528	3	3.4	0.966092	3	3.4	1.07497	2.72	1.55966	0.834207	1.707	1.45579	1.03228	1.23327	4.73806
01-01-02-02-01-01-06.mp4	AV	Speech	Calm	Strong	Kids	R1	A6	1	0.688199	4	3.6	1.3499	3	3	1.41421	6.6	1.5657	1.12886	2.3241	2.02748	0.89089	0.700984	4.5045
01-01-02-02-01-01-07.mp4	AV	Speech	Calm	Strong	Kids	R1	A7	0.8	0.550559	4	3.9	1.28668	4	3.7	1.49443	6.08	1.05854	0.591567	1.41311	0.53906	0.686493	0.477426	4.004
01-01-02-02-01-01-08.mp4	AV	Speech	Calm	Strong	Kids	R1	A8	0.8	0.550559	3.5	3.4	0.699206	4	3.5	1.17851	5.52	3.12057	0.864331	2.01093	1.4334	1.00579	0.94308	3.63696
01-01-02-02-01-01-09.mp4	AV	Speech	Calm	Strong	Kids	R1	A9	0.7	0.481739	4.5	3.8	1.47573	4.5	3.8	1.39841	5.32	2.89208	2.08201	1.65903	1.80577	1.4203	1.26308	3.33667
01-01-02-02-01-01-10.mp4	AV	Speech	Calm	Strong	Kids	R1	A10	0.8	0.550559	3	3.2	1.54919	2.5	2.5	1.58114	4.56	2.74208	1.28759	1.30724	0.769768	1.35303	1.01198	3.73706
01-01-02-02-01-01-11.mp4	AV	Speech	Calm	Strong	Kids	R1	A11	0.8	0.550559	3.5	3.6	0.966092	3	3.4	1.3499	5.6	1.30913	1.07661	1.76644	1.13591	0.832586	0.551225	3.83717
01-01-02-02-01-01-12.mp4	AV	Speech	Calm	Strong	Kids	R1	A12	1	0.688199	4	4.2	0.788811	4.5	4.4	0.699206	8.6	1.83401	0.785121	1.80843	1.52697	0.725704	0.336058	3.97063
01-01-02-02-01-01-13.mp4	AV	Speech	Calm	Strong	Kids	R1	A13	0.8	0.550559	3	3.1	1.1005	3	3	1.1547	4.88	1.5006	1.07231	1.76638	1.07828	0.783832	0.928487	3.13648
01-01-02-02-01-01-14.mp4	AV	Speech	Calm	Strong	Kids	R1	A14	0.9	0.619379	3.5	3.7	1.05935	4	3.7	1.41814	6.66	2.09598	1.07366	2.27092	1.62674	0.688745	0.74921	3.87052
01-01-02-02-01-01-15.mp4	AV	Speech	Calm	Strong	Kids	R1	A15	1	0.688199	4	3.9	0.737865	4	4	0.816497	7.9	2.10768	1.4716	1.67693	1.53371	0.72697	0.683612	3.67033
01-01-02-02-01-01-16.mp4	AV	Speech	Calm	Strong	Kids	R1	A16	0.4	0.27528	3	3.2	0.918937	3	3.2	1.22927	2.56	2.14957	1.13727	1.82679	1.51819	1.20877	1.13324	3.87052
01-01-02-02-01-01-17.mp4	AV	Speech	Calm	Strong	Kids	R1	A17	0.9	0.619379	3.5	3.4	1.26491	4	3.7	0.948683	6.39	1.76623	1.78854	2.02695	1.23448	1.2295	0.64098	3.87054
01-01-02-02-01-01-18.mp4	AV	Speech	Calm	Strong	Kids	R1	A18	1	0.688199	4	4.1	0.875595	4	4.1	0.737865	8.2	1.99012	1.22449	2.19929	1.51339	1.39379	1.06438	3.6036
01-01-02-02-01-01-19.mp4	AV	Speech	Calm	Strong	Kids	R1	A19	0.2	0.13764	4.5	4.2	0.918937	3.5	3.5	1.35401	1.54	2.93669	1.78573	1.65482	1.18281	1.20909	1.11547	4.47115
01-01-02-02-01-01-20.mp4	AV	Speech	Calm	Strong	Kids	R1	A20	0.5	0.3441	3	3.3	0.948683	4	3.6	1.17379	3.45	2.76919	1.57693	1.99993	1.84534	1.33789	1.45092	3.87054
01-01-02-02-01-01-21.mp4	AV	Speech	Calm	Strong	Kids	R1	A21	0.9	0.619379	3.5	3.4	0.699206	4	3.7	0.823273	6.39	2.18763	1.67453	1.66379	0.867245	0.862503	0.875685	4.004
01-01-02-02-01-01-22.mp4	AV	Speech	Calm	Strong	Kids	R1	A22	0.7	0.481739	4	3.7	1.1595	4	3.7	1.1595	5.18	2.64981	0.973339	0.999792	0.843038	0.700679	0.65196	3.70371
01-01-02-02-01-01-23.mp4	AV	Speech	Calm	Strong	Kids	R1	A23	1	0.688199	3.5	3.6	0.699206	4	3.9	1.1005	7.5	2.38845	1.60393	2.28195	1.31507	1.13771	0.981589	4.6046
01-01-02-02-01-01-24.mp4	AV	Speech	Calm	Strong	Kids	R1	A24	0.5	0.3441	3.5	3.5	1.08012	4	3.5	1.08012	3.5	1.48615	0.760847	1.47779	0.836228	0.821906	0.763125	4.1041
01-01-02-02-01-02-01.mp4	AV	Speech	Calm	Strong	Kids	R2	A1	0.9	0.619379	3	3.3	1.41814	4	3.7	1.1595	6.3	2.45618	2.25141	1.96255	1.51193	1.19019	0.917582	4.004
01-01-02-02-01-02-02.mp4	AV	Speech	Calm	Strong	Kids	R2	A2	1	0.688199	4.5	4	1.33333	4.5	3.7	1.63639	7.7	2.06301	1.16441	1.39499	1.28582	0.804119	0.826129	4.03737
01-01-02-02-01-02-03.mp4	AV	Speech	Calm	Strong	Kids	R2	A3	0.2	0.13764	3	2.9	0.737865	2	2	0.942809	0.98	3.42634	1.44862	1.71483	1.46917	1.37256	1.36712	3.97065
01-01-02-02-01-02-04.mp4	AV	Speech	Calm	Strong	Kids	R2	A4	0.1	0.0688199	3	3	1.05409	3	3.4	1.3499	0.64	2.37661	1.18069	1.80168	1.76643	1.42967	0.783263	3.80381
01-01-02-02-01-02-05.mp4	AV	Speech	Calm	Strong	Kids	R2	A5	0.7	0.481739	4	4.2	0.632456	4	3.7	1.1595	5.53	2.90946	1.46448	2.06134	1.43739	1.33912	1.51844	4.5045
01-01-02-02-01-02-06.mp4	AV	Speech	Calm	Strong	Kids	R2	A6	1	0.688199	4	3.5	1.64992	3.5	3.1	1.52388	6.6	1.58347	0.927477	1.12072	1.04216	0.410723	0.291222	4.63798
01-01-02-02-01-02-07.mp4	AV	Speech	Calm	Strong	Kids	R2	A7	0.8	0.550559	3	2.9	1.28668	3	3.1	1.37032	4.8	2.23786	1.82036	1.99473	0.85127	1.11503	0.933294	3.87054
01-01-02-02-01-02-08.mp4	AV	Speech	Calm	Strong	Kids	R2	A8	1	0.688199	4	3.7	1.33749	4	3.8	1.0328	7.5	1.63802	0.705475	2.86593	1.77235	0.763216	0.941288	3.73706
01-01-02-02-01-02-09.mp4	AV	Speech	Calm	Strong	Kids	R2	A9	0.7	0.481739	4	3.6	1.07497	4	3.6	1.3499	5.04	2.4117	2.13398	1.5341	1.14285	0.937843	0.794755	3.43677
01-01-02-02-01-02-10.mp4	AV	Speech	Calm	Strong	Kids	R2	A10	1	0.688199	3.5	3.6	1.26491	4	3.7	1.33749	7.3	2.16324	0.770302	1.28988	0.797059	0.839483	0.568	3.73706
01-01-02-02-01-02-11.mp4	AV	Speech	Calm	Strong	Kids	R2	A11	0.6	0.41292	4	3.7	1.41814	4	3.7	1.25167	4.44	2.5775	1.55182	1.63437	1.35354	1.03153	0.908774	3.73708
01-01-02-02-01-02-12.mp4	AV	Speech	Calm	Strong	Kids	R2	A12	0.9	0.619379	4	3.7	1.1595	4	4	1.05409	6.93	1.77308	1.08924	1.67375	1.60652	0.900414	0.750965	3.77044
01-01-02-02-01-02-13.mp4	AV	Speech	Calm	Strong	Kids	R2	A13	0.7	0.481739	2.5	3	1.24722	3	3.4	1.26491	4.48	1.74646	1.11146	1.58764	0.892941	0.859588	0.681186	3.20321
01-01-02-02-01-02-14.mp4	AV	Speech	Calm	Strong	Kids	R2	A14	0.5	0.3441	3	3.1	0.994429	3	3	1.41421	3.05	2.16261	1.38045	2.14524	2.1675	1.10914	1.31802	3.9039
01-01-02-02-01-02-15.mp4	AV	Speech	Calm	Strong	Kids	R2	A15	1	0.688199	3.5	3.3	1.1595	3	2.9	1.28668	6.2	2.41403	1.81809	1.28983	0.919542	0.865688	0.660086	3.80381
01-01-02-02-01-02-16.mp4	AV	Speech	Calm	Strong	Kids	R2	A16	0.3	0.20646	3	2.9	1.1005	3	2.8	1.39841	1.71	2.35605	1.78103	1.43183	1.21918	0.764006	0.839629	3.93727
01-01-02-02-01-02-17.mp4	AV	Speech	Calm	Strong	Kids	R2	A17	1	0.688199	4	3.7	1.33749	4	3.4	1.17379	7.1	1.58375	0.978396	1.48529	1.02882	0.998686	0.548744	3.6036
01-01-02-02-01-02-18.mp4	AV	Speech	Calm	Strong	Kids	R2	A18	0.9	0.619379	4	4	0.942809	3	3.3	1.49443	6.57	1.26138	0.511918	2.34912	1.51308	0.968741	0.488976	3.6036
01-01-02-02-01-02-19.mp4	AV	Speech	Calm	Strong	Kids	R2	A19	0.5	0.3441	4	3.9	1.19722	3	3.3	1.49443	3.6	2.31404	1.96184	1.37226	0.81477	1.2087	0.773186	4.03737
01-01-02-02-01-02-20.mp4	AV	Speech	Calm	Strong	Kids	R2	A20	0.4	0.27528	4	3.3	1.25167	3	3.2	1.13529	2.6	2.04868	1.80898	1.68227	1.01226	0.847897	0.580177	4.07075
01-01-02-02-01-02-21.mp4	AV	Speech	Calm	Strong	Kids	R2	A21	0.4	0.27528	2	2.4	1.07497	2	2.5	1.50923	1.96	2.61791	1.32746	2.39851	1.58944	1.24982	0.588892	4.17083
01-01-02-02-01-02-22.mp4	AV	Speech	Calm	Strong	Kids	R2	A22	0.6	0.41292	3	2.7	0.823273	4	3.3	1.05935	3.6	1.97366	1.13241	1.74073	1.89923	1.3145	0.91814	3.83717
01-01-02-02-01-02-23.mp4	AV	Speech	Calm	Strong	Kids	R2	A23	0.9	0.619379	4.5	3.7	1.56702	3	3.1	1.44914	6.12	2.46147	2.07238	1.59486	1.19058	1.19619	1.30578	4.60458
01-01-02-02-01-02-24.mp4	AV	Speech	Calm	Strong	Kids	R2	A24	0.3	0.20646	3	3.1	1.19722	3.5	3.1	1.52388	1.86	1.90922	1.65847	1.44794	0.939407	0.76111	0.527464	4.07073
01-01-02-02-02-01-01.mp4	AV	Speech	Calm	Strong	Dogs	R1	A1	0.5	0.3441	3	3	1.1547	3.5	3.6	0.966092	3.3	1.51567	0.537752	2.08391	1.31134	1.00106	0.820541	4.20421
01-01-02-02-02-01-02.mp4	AV	Speech	Calm	Strong	Dogs	R1	A2	0.7	0.481739	3	3.2	0.788811	3.5	3.4	1.07497	4.62	1.61779	0.964746	2.72587	2.23256	1.72986	1.47156	4.1041
01-01-02-02-02-01-03.mp4	AV	Speech	Calm	Strong	Dogs	R1	A3	0.6	0.41292	3	3	1.05409	3	2.8	1.0328	3.48	2.87154	1.88566	1.26786	1.7694	0.504739	0.467306	4.13746
01-01-02-02-02-01-04.mp4	AV	Speech	Calm	Strong	Dogs	R1	A4	0.4	0.27528	3.5	3.5	0.527046	3.5	3.5	1.08012	2.8	2.02338	1.11123	1.33375	0.659721	1.15912	1.07046	3.80379
01-01-02-02-02-01-05.mp4	AV	Speech	Calm	Strong	Dogs	R1	A5	0.6	0.41292	4	3.8	1.22927	4	4	1.05409	4.68	2.27106	2.16923	1.78865	1.79258	0.70526	0.523725	4.77144
01-01-02-02-02-01-06.mp4	AV	Speech	Calm	Strong	Dogs	R1	A6	1	0.688199	4	3.9	0.994429	3	3.1	1.44914	7	1.60362	0.499509	0.994837	0.683238	0.702747	0.556156	4.33767
01-01-02-02-02-01-07.mp4	AV	Speech	Calm	Strong	Dogs	R1	A7	0.7	0.481739	4	4	0.816497	4	3.7	1.41814	5.39	1.6532	0.589572	1.09278	0.547402	0.767119	0.548584	4.27094
01-01-02-02-02-01-08.mp4	AV	Speech	Calm	Strong	Dogs	R1	A8	0.7	0.481739	4	3.9	0.737865	4	4	0.942809	5.53	2.14835	1.54419	1.10628	0.82813	1.27043	1.42252	3.67033
01-01-02-02-02-01-09.mp4	AV	Speech	Calm	Strong	Dogs	R1	A9	0.9	0.619379	4	3.6	0.843274	3	3.3	0.948683	6.21	2.62167	1.52341	2.04474	0.780496	0.924237	0.927474	3.80379
01-01-02-02-02-01-10.mp4	AV	Speech	Calm	Strong	Dogs	R1	A10	0.7	0.481739	4	3.8	1.31656	4	3.5	1.50923	5.11	1.91285	1.30453	2.09618	1.56332	0.709234	0.428134	3.80379
01-01-02-02-02-01-11.mp4	AV	Speech	Calm	Strong	Dogs	R1	A11	0.9	0.619379	4.5	4	1.1547	4	3.9	1.37032	7.11	1.68399	0.995839	1.8211	1.58527	0.796115	0.813935	3.77044
01-01-02-02-02-01-12.mp4	AV	Speech	Calm	Strong	Dogs	R1	A12	1	0.688199	4	3.3	1.49443	4	3.1	1.52388	6.4	1.72933	1.22977	1.03261	0.563794	1.24322	1.25239	3.73708
01-01-02-02-02-01-13.mp4	AV	Speech	Calm	Strong	Dogs	R1	A13	0.8	0.550559	4	3.6	1.26491	3	3.3	0.948683	5.52	2.02733	1.00242	1.64116	1.12645	1.14243	1.00025	3.003
01-01-02-02-02-01-14.mp4	AV	Speech	Calm	Strong	Dogs	R1	A14	0.7	0.481739	4	4	1.05409	4	3.4	1.42984	5.18	1.53292	0.744955	1.07222	0.859462	0.712627	0.667432	3.73706
01-01-02-02-02-01-15.mp4	AV	Speech	Calm	Strong	Dogs	R1	A15	0.7	0.481739	2.5	2.9	1.37032	2.5	2.8	1.0328	3.99	3.16057	2.20159	1.7025	1.21877	1.16354	0.601336	3.93727
01-01-02-02-02-01-16.mp4	AV	Speech	Calm	Strong	Dogs	R1	A16	0.5	0.3441	3.5	3.5	1.08012	4	4	1.05409	3.75	1.82281	1.75546	1.40891	0.8127	1.00458	0.559106	3.80381
01-01-02-02-02-01-17.mp4	AV	Speech	Calm	Strong	Dogs	R1	A17	0.8	0.550559	3.5	3.4	1.26491	4	3.8	1.0328	5.76	1.94279	1.17658	1.63246	1.02125	1.2553	0.97054	3.83717
01-01-02-02-02-01-18.mp4	AV	Speech	Calm	Strong	Dogs	R1	A18	0.8	0.550559	3.5	3.5	1.08012	3	2.6	1.07497	4.88	2.19822	1.39117	1.71435	1.21895	1.11352	0.878583	3.60358
01-01-02-02-02-01-19.mp4	AV	Speech	Calm	Strong	Dogs	R1	A19	0.5	0.3441	3.5	3.8	1.13529	3.5	3.4	1.42984	3.6	2.19154	1.94975	1.78481	1.32792	1.1555	0.917036	4.6046
01-01-02-02-02-01-20.mp4	AV	Speech	Calm	Strong	Dogs	R1	A20	0.8	0.550559	3.5	3.4	1.26491	3.5	3.6	1.17379	5.6	1.70061	1.03851	1.98533	1.75312	1.05423	0.515438	3.63696
01-01-02-02-02-01-21.mp4	AV	Speech	Calm	Strong	Dogs	R1	A21	0.5	0.3441	3	2.9	0.994429	3	2.6	1.26491	2.75	3.68873	2.25173	2.2505	1.16	1.3098	0.60252	4.13748
01-01-02-02-02-01-22.mp4	AV	Speech	Calm	Strong	Dogs	R1	A22	0.9	0.619379	4.5	4.2	0.918937	3.5	3.5	1.17851	6.93	2.64942	1.49355	1.73387	1.39541	0.826334	0.764671	3.63696
01-01-02-02-02-01-23.mp4	AV	Speech	Calm	Strong	Dogs	R1	A23	0.9	0.619379	3	2.9	1.19722	3.5	3.1	1.1005	5.4	2.1613	1.39984	2.9035	1.89468	1.23713	1.22964	4.1041
01-01-02-02-02-01-24.mp4	AV	Speech	Calm	Strong	Dogs	R1	A24	0.7	0.481739	3.5	3.6	0.699206	4	3.6	0.843274	5.04	3.23129	1.99301	1.61313	0.992009	0.985855	0.860539	4.03737
01-01-02-02-02-02-01.mp4	AV	Speech	Calm	Strong	Dogs	R2	A1	1	0.688199	4	4	0.942809	4	3.9	1.28668	7.9	1.82071	1.02911	1.72679	1.63437	0.775025	0.958468	4.004
01-01-02-02-02-02-02.mp4	AV	Speech	Calm	Strong	Dogs	R2	A2	0.6	0.41292	2.5	2.5	1.2693	3	2.9	1.1005	3.24	1.6794	1.03875	1.57122	0.974406	1.05745	0.825309	4.1041
01-01-02-02-02-02-03.mp4	AV	Speech	Calm	Strong	Dogs	R2	A3	0.3	0.20646	3	3	1.41421	3	3	1.41421	1.8	2.4918	1.41573	1.32058	0.825074	0.937204	1.15595	4.004
01-01-02-02-02-02-04.mp4	AV	Speech	Calm	Strong	Dogs	R2	A4	0.4	0.27528	3.5	3.3	1.33749	4.5	3.9	1.44914	2.88	2.21394	0.998875	1.87214	1.09699	1.07717	0.802003	4.03737
01-01-02-02-02-02-05.mp4	AV	Speech	Calm	Strong	Dogs	R2	A5	0.8	0.550559	3.5	3.5	1.08012	4	3.5	1.2693	5.6	2.31678	1.58135	1.89036	1.24863	1.371	1.35523	4.30429
01-01-02-02-02-02-06.mp4	AV	Speech	Calm	Strong	Dogs	R2	A6	1	0.688199	4.5	3.8	1.47573	5	3.6	1.89737	7.4	1.48312	0.995128	1.6668	1.20218	1.03968	0.822817	4.77144
01-01-02-02-02-02-07.mp4	AV	Speech	Calm	Strong	Dogs	R2	A7	0.9	0.619379	4	4	1.05409	4	3.6	1.3499	6.84	2.02919	1.67352	1.87782	0.816023	1.3303	0.855904	4.1041
01-01-02-02-02-02-08.mp4	AV	Speech	Calm	Strong	Dogs	R2	A8	0.8	0.550559	4	3.4	1.17379	2.5	2.6	1.42984	4.8	2.50731	1.62473	1.70854	0.949761	0.913069	0.642155	3.80381
01-01-02-02-02-02-09.mp4	AV	Speech	Calm	Strong	Dogs	R2	A9	0.7	0.481739	3	3.1	1.19722	3	2.7	0.948683	4.06	2.18571	0.863752	1.91606	1.53556	0.757347	0.80514	3.63698
01-01-02-02-02-02-10.mp4	AV	Speech	Calm	Strong	Dogs	R2	A10	0.8	0.550559	3	3.4	1.07497	4	3.8	1.22927	5.76	2.1233	2.12941	1.73874	1.28291	0.917377	0.642376	3.83717
01-01-02-02-02-02-11.mp4	AV	Speech	Calm	Strong	Dogs	R2	A11	1	0.688199	4	3.8	1.22927	4	3.8	1.22927	7.6	1.62444	1.28402	1.54003	0.876517	0.811494	0.613193	3.83717
01-01-02-02-02-02-12.mp4	AV	Speech	Calm	Strong	Dogs	R2	A12	1	0.688199	3.5	3.8	1.13529	4.5	4.1	1.1005	7.9	1.88853	1.79369	1.55868	1.32254	1.06408	0.760192	3.80381
01-01-02-02-02-02-13.mp4	AV	Speech	Calm	Strong	Dogs	R2	A13	0.9	0.619379	3.5	3.5	1.2693	3	3.2	1.0328	6.03	1.31081	0.851253	1.48195	1.28101	0.909434	0.853302	3.03635
01-01-02-02-02-02-14.mp4	AV	Speech	Calm	Strong	Dogs	R2	A14	0.8	0.550559	3	3.3	1.25167	3	3.1	1.44914	5.12	1.8243	0.988834	1.75631	1.03334	1.23976	1.24353	3.77044
01-01-02-02-02-02-15.mp4	AV	Speech	Calm	Strong	Dogs	R2	A15	0.9	0.619379	3	3.4	0.843274	3.5	3.6	0.966092	6.3	2.80707	2.21775	1.48974	1.51919	0.996448	1.05633	3.60358
01-01-02-02-02-02-16.mp4	AV	Speech	Calm	Strong	Dogs	R2	A16	0.4	0.27528	4	3.9	0.737865	4	3.5	1.43372	2.96	2.26592	1.91199	2.65195	1.22663	1.05172	0.91811	3.80379
01-01-02-02-02-02-17.mp4	AV	Speech	Calm	Strong	Dogs	R2	A17	0.9	0.619379	3	3.1	1.59513	3	3	1.24722	5.49	1.49686	1.04426	1.58667	1.44034	0.698075	0.652163	3.53688
01-01-02-02-02-02-18.mp4	AV	Speech	Calm	Strong	Dogs	R2	A18	0.7	0.481739	3	3.5	0.849837	4	4.1	0.875595	5.32	2.71665	1.23905	1.97584	0.856404	1.05244	1.125	3.6036
01-01-02-02-02-02-19.mp4	AV	Speech	Calm	Strong	Dogs	R2	A19	0.5	0.3441	4	4	0.816497	3.5	3.3	1.1595	3.65	1.57763	0.83949	1.50377	0.895972	1.47528	1.30021	4.30429
01-01-02-02-02-02-20.mp4	AV	Speech	Calm	Strong	Dogs	R2	A20	0.9	0.619379	4	3.8	0.788811	4	3.6	1.50555	6.66	1.54362	1.43011	1.29523	0.346412	0.92339	0.647233	3.63698
01-01-02-02-02-02-21.mp4	AV	Speech	Calm	Strong	Dogs	R2	A21	0.3	0.20646	3	2.9	1.19722	3	2.7	1.41814	1.68	2.04008	1.4739	0.993175	0.848874	0.553355	0.319393	3.97063
01-01-02-02-02-02-22.mp4	AV	Speech	Calm	Strong	Dogs	R2	A22	0.8	0.550559	3	2.7	0.674949	3	3.3	1.25167	4.8	2.61043	1.9631	1.87409	1.23239	1.09767	1.00745	3.77044
01-01-02-02-02-02-23.mp4	AV	Speech	Calm	Strong	Dogs	R2	A23	0.9	0.619379	3.5	3.5	1.35401	4.5	3.9	1.37032	6.66	2.47279	2.01451	2.21691	1.07709	1.59552	1.42077	4.57123
01-01-02-02-02-02-24.mp4	AV	Speech	Calm	Strong	Dogs	R2	A24	0.8	0.550559	4	3.7	1.25167	4	3.9	1.28668	6.08	2.41867	1.80522	2.09046	1.50303	1.2812	1.30264	4.1041
01-01-03-01-01-01-01.mp4	AV	Speech	Happy	Normal	Kids	R1	A1	0.8	0.573486	4	3.5	0.707107	5	3.9	1.52388	5.92	2.64202	2.02882	1.61664	0.898948	1.04023	0.510814	3.47015
01-01-03-01-01-01-02.mp4	AV	Speech	Happy	Normal	Kids	R1	A2	1	0.716858	3	3.4	1.07497	4.5	4.2	0.918937	7.6	1.90868	1.78502	2.03681	1.56845	1.04342	0.727774	3.6036
01-01-03-01-01-01-03.mp4	AV	Speech	Happy	Normal	Kids	R1	A3	0.4	0.286743	3.5	3.2	1.61933	3	3.2	1.47573	2.56	3.79629	2.06103	2.16891	1.56327	1.31726	1.18139	3.77042
01-01-03-01-01-01-04.mp4	AV	Speech	Happy	Normal	Kids	R1	A4	0.7	0.5018	3	3.1	0.875595	2.5	2.9	1.1005	4.2	3.57995	2.62813	1.87834	1.26329	1.09466	0.712838	3.5035
01-01-03-01-01-01-05.mp4	AV	Speech	Happy	Normal	Kids	R1	A5	0.8	0.573486	3.5	3.7	1.05935	3	3.4	1.17379	5.68	3.32926	1.83875	1.9318	0.681895	0.80939	0.410238	4.004
01-01-03-01-01-01-06.mp4	AV	Speech	Happy	Normal	Kids	R1	A6	0.9	0.645172	4	4	0.816497	4	3.8	1.0328	7.02	2.07195	1.0884	1.78665	0.854865	1.10759	0.635257	3.53685
01-01-03-01-01-01-07.mp4	AV	Speech	Happy	Normal	Kids	R1	A7	0.8	0.573486	4	3.9	0.875595	3.5	3.5	1.17851	5.92	2.65667	2.10572	1.13873	0.669384	1.06512	1.33146	3.5035
01-01-03-01-01-01-08.mp4	AV	Speech	Happy	Normal	Kids	R1	A8	1	0.716858	4	3.8	0.788811	3.5	3.6	1.17379	7.4	2.51472	1.14939	1.7636	1.50001	0.621963	0.487728	3.5035
01-01-03-01-01-01-09.mp4	AV	Speech	Happy	Normal	Kids	R1	A9	0.8	0.573486	3.5	3.6	0.966092	4	4.3	0.674949	6.32	2.30522	1.55586	1.25358	0.597966	0.941877	0.944292	3.33667
01-01-03-01-01-01-10.mp4	AV	Speech	Happy	Normal	Kids	R1	A10	0.9	0.645172	4	4	1.05409	4	4	1.24722	7.2	2.16126	0.980159	1.71269	1.04806	0.898481	0.930861	3.5035
01-01-03-01-01-01-11.mp4	AV	Speech	Happy	Normal	Kids	R1	A11	0.4	0.286743	3	3.3	1.41814	4.5	4.2	1.0328	3	2.59796	2.61145	1.21236	0.809758	1.10747	1.13955	3.1031
01-01-03-01-01-01-12.mp4	AV	Speech	Happy	Normal	Kids	R1	A12	1	0.716858	3	3.1	0.737865	2.5	2.8	1.22927	5.9	2.64392	2.19976	1.58085	1.50507	1.24693	1.13009	3.70371
01-01-03-01-01-01-13.mp4	AV	Speech	Happy	Normal	Kids	R1	A13	0.9	0.645172	3	2.7	0.674949	3	3.5	1.43372	5.58	2.26618	0.724831	2.16841	1.53809	0.98325	0.514436	3.23656
01-01-03-01-01-01-14.mp4	AV	Speech	Happy	Normal	Kids	R1	A14	0.8	0.573486	4	3.9	1.1005	3	3.4	1.07497	5.84	2.00849	0.413103	1.49449	1.3172	1.23917	1.11251	3.70371
01-01-03-01-01-01-15.mp4	AV	Speech	Happy	Normal	Kids	R1	A15	0.9	0.645172	3	2.8	0.788811	3.5	3.3	0.948683	5.49	2.29703	1.57939	1.78081	1.40292	1.11252	0.717074	3.4034
01-01-03-01-01-01-16.mp4	AV	Speech	Happy	Normal	Kids	R1	A16	0.9	0.645172	4	3.6	0.843274	3.5	3.5	1.35401	6.39	1.57882	1.45007	1.32246	0.816985	0.623838	0.61226	3.70371
01-01-03-01-01-01-17.mp4	AV	Speech	Happy	Normal	Kids	R1	A17	0.5	0.358429	3	3.1	0.875595	3.5	3.4	1.26491	3.25	2.39853	1.26176	1.62095	0.999659	1.26506	0.776128	3.47012
01-01-03-01-01-01-18.mp4	AV	Speech	Happy	Normal	Kids	R1	A18	0.9	0.645172	4	3.9	0.994429	3.5	3.2	1.39841	6.39	1.5795	0.640608	1.95132	0.336694	0.828037	0.636989	3.4034
01-01-03-01-01-01-19.mp4	AV	Speech	Happy	Normal	Kids	R1	A19	0.3	0.215057	3	3.4	0.843274	3.5	3.4	0.966092	2.04	3.39478	2.67308	1.3548	0.913754	0.548604	0.349305	3.63696
01-01-03-01-01-01-20.mp4	AV	Speech	Happy	Normal	Kids	R1	A20	0.7	0.5018	4	4	0.666667	4	3.9	0.737865	5.53	1.95653	1.39542	2.22265	1.2906	0.536573	0.413586	3.53688
01-01-03-01-01-01-21.mp4	AV	Speech	Happy	Normal	Kids	R1	A21	0.7	0.5018	3	3.1	0.994429	3.5	2.9	1.28668	4.2	2.38298	1.19616	1.24163	0.614196	1.09715	0.870695	3.83717
01-01-03-01-01-01-22.mp4	AV	Speech	Happy	Normal	Kids	R1	A22	0.8	0.573486	3	2.6	0.699206	3	2.7	0.674949	4.24	2.54648	1.65335	1.29716	0.782925	0.629139	0.373775	3.53688
01-01-03-01-01-01-23.mp4	AV	Speech	Happy	Normal	Kids	R1	A23	0.2	0.143372	4	3.7	0.948683	3.5	3.6	1.26491	1.46	2.93152	1.77209	1.82953	1.30681	1.39895	1.25652	3.33667
01-01-03-01-01-01-24.mp4	AV	Speech	Happy	Normal	Kids	R1	A24	0.9	0.645172	4	3.8	0.918937	4	3.9	0.994429	6.93	2.14268	1.09061	1.7385	1.5509	0.617216	0.463487	3.6036
01-01-03-01-01-02-01.mp4	AV	Speech	Happy	Normal	Kids	R2	A1	0.9	0.645172	3.5	3.6	0.966092	4	3.6	1.07497	6.48	1.85743	0.811362	1.83965	1.60423	1.56	1.51019	3.47012
01-01-03-01-01-02-02.mp4	AV	Speech	Happy	Normal	Kids	R2	A2	0.9	0.645172	3	3.3	0.674949	4	3.8	1.0328	6.39	2.54189	1.70622	0.996991	0.680325	0.861966	0.890348	3.70369
01-01-03-01-01-02-03.mp4	AV	Speech	Happy	Normal	Kids	R2	A3	0.7	0.5018	3	3.6	0.843274	3	3	1.1547	4.62	2.9109	1.57466	2.35173	1.98107	0.882473	0.64056	3.60358
01-01-03-01-01-02-04.mp4	AV	Speech	Happy	Normal	Kids	R2	A4	1	0.716858	4	3.8	0.918937	3	3.1	1.1005	6.9	1.96739	1.05902	1.26379	0.784676	1.15493	0.769398	3.53685
01-01-03-01-01-02-05.mp4	AV	Speech	Happy	Normal	Kids	R2	A5	0.9	0.645172	4	3.8	1.13529	4	3.9	0.875595	6.93	1.66452	0.642808	1.86657	1.06812	1.23737	0.899022	3.23656
01-01-03-01-01-02-06.mp4	AV	Speech	Happy	Normal	Kids	R2	A6	1	0.716858	4.5	4.2	0.918937	4.5	4.1	1.19722	8.3	1.79683	1.14946	1.57809	1.05422	0.908313	0.686622	3.6036
01-01-03-01-01-02-07.mp4	AV	Speech	Happy	Normal	Kids	R2	A7	0.7	0.5018	3	3.3	0.948683	3	3.4	0.843274	4.69	1.97844	1.29914	1.86889	1.07874	1.05943	0.803266	3.47012
01-01-03-01-01-02-08.mp4	AV	Speech	Happy	Normal	Kids	R2	A8	0.9	0.645172	5	4.3	1.05935	5	4.4	1.3499	7.83	1.74611	1.05422	1.84044	1.1486	0.690358	0.961098	3.43675
01-01-03-01-01-02-09.mp4	AV	Speech	Happy	Normal	Kids	R2	A9	0.9	0.645172	3.5	3.7	1.05935	4	4.2	0.788811	7.11	2.90197	2.74447	2.34164	1.91058	0.759106	0.689199	3.53685
01-01-03-01-01-02-10.mp4	AV	Speech	Happy	Normal	Kids	R2	A10	0.9	0.645172	3.5	3.6	0.966092	3.5	3.8	1.13529	6.66	2.44967	1.41222	1.76266	1.4538	0.925241	0.733064	3.47012
01-01-03-01-01-02-11.mp4	AV	Speech	Happy	Normal	Kids	R2	A11	0.7	0.5018	3	3.1	0.994429	3.5	3.4	1.17379	4.55	2.82275	1.17585	1.61495	1.66902	0.684838	0.523155	3.20321
01-01-03-01-01-02-12.mp4	AV	Speech	Happy	Normal	Kids	R2	A12	0.8	0.573486	3	3.5	0.971825	4	3.5	0.971825	5.6	2.0162	1.13642	1.45085	0.699361	1.20009	0.743037	3.73706
01-01-03-01-01-02-13.mp4	AV	Speech	Happy	Normal	Kids	R2	A13	0.7	0.5018	3	2.9	1.1005	3	3.3	0.674949	4.34	1.74467	0.503257	1.81954	0.878203	1.3556	0.828442	3.20321
01-01-03-01-01-02-14.mp4	AV	Speech	Happy	Normal	Kids	R2	A14	0.8	0.573486	4	4.2	0.632456	4	3.8	1.0328	6.4	2.89832	1.91394	1.62512	0.842155	0.883098	0.818521	3.67033
01-01-03-01-01-02-15.mp4	AV	Speech	Happy	Normal	Kids	R2	A15	0.5	0.358429	3.5	3.5	1.08012	4	4	0.816497	3.75	3.24054	1.89261	2.2452	1.35247	0.820942	0.862397	3.33667
01-01-03-01-01-02-16.mp4	AV	Speech	Happy	Normal	Kids	R2	A16	0.9	0.645172	3	3.7	0.948683	4	4.1	0.875595	7.02	2.07198	1.46857	1.84137	1.5193	0.750868	0.620614	3.67033
01-01-03-01-01-02-17.mp4	AV	Speech	Happy	Normal	Kids	R2	A17	0.3	0.215057	3	3	0.816497	3	2.8	0.918937	1.74	2.19009	0.730161	1.89669	1.85334	1.36356	1.36925	3.53688
01-01-03-01-01-02-18.mp4	AV	Speech	Happy	Normal	Kids	R2	A18	1	0.716858	4	4.1	0.875595	3	3	1.56347	7.1	2.10292	1.00789	2.09082	1.39246	1.06907	1.17357	3.37002
01-01-03-01-01-02-19.mp4	AV	Speech	Happy	Normal	Kids	R2	A19	0.6	0.430115	4	3.9	0.737865	4	3.2	1.0328	4.26	2.84569	1.77955	1.41655	0.669388	1.01151	0.878791	3.70371
01-01-03-01-01-02-20.mp4	AV	Speech	Happy	Normal	Kids	R2	A20	0.8	0.573486	3.5	3.5	0.849837	4	3.7	1.56702	5.76	2.44412	1.48896	2.53683	1.61547	1.25933	1.07598	3.70369
01-01-03-01-01-02-21.mp4	AV	Speech	Happy	Normal	Kids	R2	A21	0.6	0.430115	4.5	4.1	1.1005	3	3.2	1.13529	4.38	1.77374	0.79538	1.52675	1.15648	1.55732	1.29302	3.80379
01-01-03-01-01-02-22.mp4	AV	Speech	Happy	Normal	Kids	R2	A22	0.9	0.645172	3	3.5	0.707107	3	3	1.05409	5.85	2.50962	1.28367	1.15568	0.705798	0.871217	0.683625	3.43677
01-01-03-01-01-02-23.mp4	AV	Speech	Happy	Normal	Kids	R2	A23	0.7	0.5018	3	3.3	0.674949	3.5	3.6	0.966092	4.83	2.16861	1.45241	1.59787	1.1168	0.731155	0.451644	3.26994
01-01-03-01-01-02-24.mp4	AV	Speech	Happy	Normal	Kids	R2	A24	0.8	0.573486	4	3.6	0.843274	3	3.3	1.1595	5.52	1.82976	1.07582	2.24833	1.79369	1.18803	0.998605	3.9039
01-01-03-01-02-01-01.mp4	AV	Speech	Happy	Normal	Dogs	R1	A1	1	0.716858	3	3.3	0.823273	4	3.9	0.737865	7.2	2.19422	1.2937	2.99183	2.20826	1.40332	1.0153	3.53685
01-01-03-01-02-01-02.mp4	AV	Speech	Happy	Normal	Dogs	R1	A2	0.7	0.5018	3	2.9	0.875595	4	3.5	1.35401	4.48	1.77055	1.14264	1.85004	1.23338	1.32317	0.880999	3.77044
01-01-03-01-02-01-03.mp4	AV	Speech	Happy	Normal	Dogs	R1	A3	0.7	0.5018	4	3.8	1.0328	3.5	3.2	1.47573	4.9	3.08778	1.38373	1.73511	0.822678	0.681159	0.586689	3.5035
01-01-03-01-02-01-04.mp4	AV	Speech	Happy	Normal	Dogs	R1	A4	1	0.716858	4	3.7	1.1595	3.5	3.6	1.42984	7.3	2.04149	2.08881	1.44144	1.84551	0.518223	0.302121	3.5035
01-01-03-01-02-01-05.mp4	AV	Speech	Happy	Normal	Dogs	R1	A5	1	0.716858	4	4	0.816497	4	3.7	1.05935	7.7	1.98156	0.912108	1.82893	1.55567	1.4701	0.83154	3.37002
01-01-03-01-02-01-06.mp4	AV	Speech	Happy	Normal	Dogs	R1	A6	0.9	0.645172	4	3.9	0.994429	5	4.2	1.13529	7.29	2.58306	1.72894	2.89706	1.75094	1.03727	1.18203	3.47012
01-01-03-01-02-01-07.mp4	AV	Speech	Happy	Normal	Dogs	R1	A7	1	0.716858	3.5	3.5	0.849837	3.5	3.3	0.823273	6.8	1.97497	0.975	2.41628	1.77859	1.02199	0.694739	3.4034
01-01-03-01-02-01-08.mp4	AV	Speech	Happy	Normal	Dogs	R1	A8	0.9	0.645172	4.5	4.5	0.527046	4.5	4.4	0.699206	8.01	2.14729	1.32556	1.97818	1.39519	0.830091	0.729238	3.47012
01-01-03-01-02-01-09.mp4	AV	Speech	Happy	Normal	Dogs	R1	A9	0.8	0.573486	2	2.5	1.17851	3	3.1	1.37032	4.48	2.32937	1.45581	1.5715	0.905361	1.00782	0.670008	3.30329
01-01-03-01-02-01-10.mp4	AV	Speech	Happy	Normal	Dogs	R1	A10	0.9	0.645172	5	4.5	0.707107	4	4	1.05409	7.65	2.0113	0.809555	1.28056	0.684987	0.384629	0.263337	3.30329
01-01-03-01-02-01-11.mp4	AV	Speech	Happy	Normal	Dogs	R1	A11	0.8	0.573486	4	3.5	1.35401	4	3.4	1.07497	5.52	1.8735	0.941131	1.65009	0.888575	0.822724	0.56534	3.16983
01-01-03-01-02-01-12.mp4	AV	Speech	Happy	Normal	Dogs	R1	A12	0.8	0.573486	3	3.3	1.05935	4	4	0.942809	5.84	1.95321	0.530808	1.62776	1.10144	1.38674	0.549802	3.5035
01-01-03-01-02-01-13.mp4	AV	Speech	Happy	Normal	Dogs	R1	A13	0.9	0.645172	3	2.9	0.994429	3	3.2	1.0328	5.49	2.00691	1.05765	1.64864	0.613752	0.95319	0.693194	3.13648
01-01-03-01-02-01-14.mp4	AV	Speech	Happy	Normal	Dogs	R1	A14	0.6	0.430115	3	3.1	0.994429	3.5	3.5	0.849837	3.96	2.80367	1.79241	1.60709	0.966066	1.02797	0.84483	3.4034
01-01-03-01-02-01-15.mp4	AV	Speech	Happy	Normal	Dogs	R1	A15	0.6	0.430115	3	3	1.1547	4	3.7	0.948683	4.02	2.37009	0.883928	2.29719	1.53044	1.09369	0.498618	3.33667
01-01-03-01-02-01-16.mp4	AV	Speech	Happy	Normal	Dogs	R1	A16	1	0.716858	4	3.8	0.788811	4	3.9	0.875595	7.7	2.6917	1.73888	2.27026	1.76502	1.58011	1.26644	3.73706
01-01-03-01-02-01-17.mp4	AV	Speech	Happy	Normal	Dogs	R1	A17	0.6	0.430115	3	3.2	0.918937	3.5	3.7	0.823273	4.14	2.89716	1.14651	1.94168	1.00909	1.08123	0.794494	3.47015
01-01-03-01-02-01-18.mp4	AV	Speech	Happy	Normal	Dogs	R1	A18	0.8	0.573486	3.5	3.4	0.699206	4	3.9	0.737865	5.84	2.53605	1.38725	2.25665	1.74037	1.12765	0.483737	3.43675
01-01-03-01-02-01-19.mp4	AV	Speech	Happy	Normal	Dogs	R1	A19	0.7	0.5018	4	3.8	0.788811	3	3.8	1.0328	5.32	2.17068	0.886245	1.04331	0.494339	0.919663	0.67843	3.26994
01-01-03-01-02-01-20.mp4	AV	Speech	Happy	Normal	Dogs	R1	A20	0.6	0.430115	3	3.2	1.0328	3.5	3.5	0.849837	4.02	3.19878	1.78734	1.70256	1.04264	1.04094	1.10474	3.47012
01-01-03-01-02-01-21.mp4	AV	Speech	Happy	Normal	Dogs	R1	A21	0.5	0.358429	3.5	3.4	1.26491	3.5	3.2	1.47573	3.3	2.8791	2.27886	1.10429	0.673641	0.82015	0.978567	3.70371
01-01-03-01-02-01-22.mp4	AV	Speech	Happy	Normal	Dogs	R1	A22	1	0.716858	3	2.7	0.948683	3.5	3.3	1.05935	6	2.51079	1.16407	2.43726	1.33546	1.89751	1.31123	3.5035
01-01-03-01-02-01-23.mp4	AV	Speech	Happy	Normal	Dogs	R1	A23	0.8	0.573486	3	3.1	0.994429	3	3.1	1.19722	4.96	3.17671	2.02007	1.48221	0.549319	0.895494	0.656058	3.23656
01-01-03-01-02-01-24.mp4	AV	Speech	Happy	Normal	Dogs	R1	A24	0.7	0.5018	3	3.1	1.44914	4	3.6	1.42984	4.69	3.15161	2.17505	2.07381	1.33305	0.933109	0.764755	3.5035
01-01-03-01-02-02-01.mp4	AV	Speech	Happy	Normal	Dogs	R2	A1	1	0.716858	3	3.3	1.05935	3	3.1	1.44914	6.4	1.93246	1.46846	2.28857	2.17135	0.767509	0.66194	3.70371
01-01-03-01-02-02-02.mp4	AV	Speech	Happy	Normal	Dogs	R2	A2	0.7	0.5018	3	3	1.1547	3.5	3.1	1.37032	4.27	3.14514	2.08766	1.82304	1.54567	1.1904	1.0235	3.73708
01-01-03-01-02-02-03.mp4	AV	Speech	Happy	Normal	Dogs	R2	A3	0.7	0.5018	4	3.6	0.843274	4	3.4	0.966092	4.9	1.62106	0.760213	1.68907	1.48144	1.22176	1.03082	3.5035
01-01-03-01-02-02-04.mp4	AV	Speech	Happy	Normal	Dogs	R2	A4	1	0.716858	4	3.8	0.788811	3.5	3.5	0.849837	7.3	1.91102	1.18442	2.1523	0.69608	0.86195	0.655757	3.43677
01-01-03-01-02-02-05.mp4	AV	Speech	Happy	Normal	Dogs	R2	A5	0.8	0.573486	5	4.6	0.699206	4	3.8	1.39841	6.72	2.62517	1.16506	2.25277	1.86707	1.42983	1.25011	3.77044
01-01-03-01-02-02-06.mp4	AV	Speech	Happy	Normal	Dogs	R2	A6	1	0.716858	4	4.1	0.737865	4.5	4	1.33333	8.1	2.12914	0.603256	2.05618	1.94419	0.928835	0.616579	3.43677
01-01-03-01-02-02-07.mp4	AV	Speech	Happy	Normal	Dogs	R2	A7	1	0.716858	3.5	3.6	0.699206	4	3.4	1.42984	7	2.00726	2.00557	2.11637	1.5536	0.946401	0.928673	3.4034
01-01-03-01-02-02-08.mp4	AV	Speech	Happy	Normal	Dogs	R2	A8	0.9	0.645172	4	3.9	0.737865	4	4.2	0.788811	7.29	2.08592	1.24649	1.63095	0.627149	1.09357	0.711631	3.43677
01-01-03-01-02-02-09.mp4	AV	Speech	Happy	Normal	Dogs	R2	A9	1	0.716858	3	3	0.816497	3.5	3.2	1.13529	6.2	1.96713	1.12324	2.00164	2.00587	0.924559	0.950531	3.47015
01-01-03-01-02-02-10.mp4	AV	Speech	Happy	Normal	Dogs	R2	A10	0.7	0.5018	3.5	3.2	1.0328	3	3.1	0.875595	4.41	2.00352	0.741042	2.07022	1.38151	1.09802	1.25075	3.33667
01-01-03-01-02-02-11.mp4	AV	Speech	Happy	Normal	Dogs	R2	A11	0.6	0.430115	3.5	3.5	1.08012	4	3.9	0.994429	4.44	1.52811	0.643324	1.54893	1.57911	0.763657	0.54578	3.23658
01-01-03-01-02-02-12.mp4	AV	Speech	Happy	Normal	Dogs	R2	A12	0.9	0.645172	3.5	3.8	0.918937	4	3.7	1.25167	6.75	1.96169	1.14903	2.15263	1.72156	1.1377	1.07006	3.73708
01-01-03-01-02-02-13.mp4	AV	Speech	Happy	Normal	Dogs	R2	A13	1	0.716858	3	3.3	0.674949	4	3.5	1.35401	6.8	1.87637	0.851302	1.56504	1.44935	0.973639	0.699981	3.20321
01-01-03-01-02-02-14.mp4	AV	Speech	Happy	Normal	Dogs	R2	A14	1	0.716858	4	3.9	0.737865	4	3.6	1.17379	7.5	1.47305	0.720468	1.27046	1.22137	0.907097	0.763834	3.47012
01-01-03-01-02-02-15.mp4	AV	Speech	Happy	Normal	Dogs	R2	A15	0.8	0.573486	3	3	0.666667	3	3.4	0.699206	5.12	1.88638	1.08018	1.6937	1.69	0.996161	0.774354	3.43677
01-01-03-01-02-02-16.mp4	AV	Speech	Happy	Normal	Dogs	R2	A16	1	0.716858	4	3.8	0.421637	4	4.3	0.483046	8.1	1.82604	1.1588	1.54782	1.18181	1.01805	0.78708	3.67033
01-01-03-01-02-02-17.mp4	AV	Speech	Happy	Normal	Dogs	R2	A17	0.5	0.358429	3	3.1	1.1005	3	3	0.942809	3.05	3.06788	2.21992	1.1885	0.780707	0.667485	0.357932	3.53685
01-01-03-01-02-02-18.mp4	AV	Speech	Happy	Normal	Dogs	R2	A18	1	0.716858	3	3.2	0.918937	4	3.8	1.22927	7	1.74902	0.63504	1.90755	1.18576	1.28503	1.25999	3.5035
01-01-03-01-02-02-19.mp4	AV	Speech	Happy	Normal	Dogs	R2	A19	0.9	0.645172	3.5	3.6	1.3499	4.5	4.3	0.823273	7.11	2.06072	0.727918	1.45833	0.638891	0.491811	0.339972	3.30331
01-01-03-01-02-02-20.mp4	AV	Speech	Happy	Normal	Dogs	R2	A20	0.7	0.5018	3	3	0.816497	3	2.9	0.875595	4.13	2.66837	1.85632	1.61622	0.98663	0.865172	0.655497	3.4034
01-01-03-01-02-02-21.mp4	AV	Speech	Happy	Normal	Dogs	R2	A21	0.6	0.430115	3	3.1	0.737865	3	3.1	0.567646	3.72	2.04994	1.27325	1.95069	1.44908	1.12957	0.862341	3.83717
01-01-03-01-02-02-22.mp4	AV	Speech	Happy	Normal	Dogs	R2	A22	0.8	0.573486	3	3.2	0.632456	3.5	3.3	1.56702	5.2	3.03353	2.07129	2.37684	1.29389	1.21074	0.560196	3.5035
01-01-03-01-02-02-23.mp4	AV	Speech	Happy	Normal	Dogs	R2	A23	0.8	0.573486	3	3.3	0.948683	4	3.8	1.0328	5.68	2.43265	1.6477	2.2707	1.65058	1.10528	0.835732	3.26994
01-01-03-01-02-02-24.mp4	AV	Speech	Happy	Normal	Dogs	R2	A24	0.9	0.645172	3.5	3.5	1.2693	4	3.6	1.3499	6.39	1.95149	0.595993	2.2597	1.15914	0.698133	0.499539	3.73706
01-01-03-02-01-01-01.mp4	AV	Speech	Happy	Strong	Kids	R1	A1	0.7	0.5018	4	3.9	0.994429	4.5	3.9	1.44914	5.46	1.70946	0.96385	1.57593	1.07821	0.579126	0.619563	3.67033
01-01-03-02-01-01-02.mp4	AV	Speech	Happy	Strong	Kids	R1	A2	1	0.716858	4	4.1	0.737865	3	3.3	1.49443	7.4	1.82607	1.29562	2.67648	1.78044	1.26787	0.943871	3.70371
01-01-03-02-01-01-03.mp4	AV	Speech	Happy	Strong	Kids	R1	A3	0.7	0.5018	3	3.3	1.25167	3	2.9	1.1005	4.34	2.56459	2.29763	1.54623	0.724018	1.14627	0.914683	4.30431
01-01-03-02-01-01-04.mp4	AV	Speech	Happy	Strong	Kids	R1	A4	0.9	0.645172	4.5	4.4	0.699206	3	3.2	1.31656	6.84	1.69191	0.920625	1.76215	1.27214	0.880144	0.826074	3.87054
01-01-03-02-01-01-05.mp4	AV	Speech	Happy	Strong	Kids	R1	A5	0.9	0.645172	4	3.6	1.3499	3	3.2	1.22927	6.12	4.2421	2.25532	2.46973	1.47433	1.2619	1.00049	4.13748
01-01-03-02-01-01-06.mp4	AV	Speech	Happy	Strong	Kids	R1	A6	1	0.716858	5	4.9	0.316228	4	3.6	1.3499	8.5	3.19811	2.18264	2.18075	1.77559	1.21784	0.916876	3.5035
01-01-03-02-01-01-07.mp4	AV	Speech	Happy	Strong	Kids	R1	A7	0.7	0.5018	3.5	3.7	1.05935	2.5	2.7	1.05935	4.48	1.93311	0.811082	1.93324	1.87258	1.70965	1.24716	4.1041
01-01-03-02-01-01-08.mp4	AV	Speech	Happy	Strong	Kids	R1	A8	0.9	0.645172	4	4.1	0.737865	4	3.6	1.42984	6.93	1.81009	1.68292	1.66392	1.49977	0.735118	0.658388	3.77042
01-01-03-02-01-01-09.mp4	AV	Speech	Happy	Strong	Kids	R1	A9	0.8	0.573486	4.5	4.5	0.527046	4	3.8	1.0328	6.64	2.82055	1.45461	1.98714	1.57934	0.787794	0.613051	3.77044
01-01-03-02-01-01-10.mp4	AV	Speech	Happy	Strong	Kids	R1	A10	0.8	0.573486	5	4.6	0.516398	4	4	1.05409	6.88	2.40986	1.65626	1.7138	1.64664	1.23087	0.827003	3.83717
01-01-03-02-01-01-11.mp4	AV	Speech	Happy	Strong	Kids	R1	A11	1	0.716858	4	4.2	0.788811	4	4.3	0.674949	8.5	1.5787	0.672217	1.08375	0.663452	0.78433	0.751847	4.03737
01-01-03-02-01-01-12.mp4	AV	Speech	Happy	Strong	Kids	R1	A12	0.9	0.645172	4	4.1	0.737865	3	3.1	1.19722	6.48	2.57568	1.8146	2.09593	1.79315	1.35008	1.48918	4.20421
01-01-03-02-01-01-13.mp4	AV	Speech	Happy	Strong	Kids	R1	A13	0.7	0.5018	4	3.7	0.948683	3	2.9	1.44914	4.62	1.84695	1.29056	1.6432	0.985358	0.815842	0.879165	3.43677
01-01-03-02-01-01-14.mp4	AV	Speech	Happy	Strong	Kids	R1	A14	0.9	0.645172	5	4.5	0.707107	4	3.9	1.19722	7.56	2.09752	1.00234	1.74801	0.867777	0.874633	0.803103	3.77042
01-01-03-02-01-01-15.mp4	AV	Speech	Happy	Strong	Kids	R1	A15	0.9	0.645172	3	3.4	1.26491	3	3	1.24722	5.76	2.30003	0.816595	1.31245	0.765862	0.623405	0.563472	3.57023
01-01-03-02-01-01-16.mp4	AV	Speech	Happy	Strong	Kids	R1	A16	0.9	0.645172	4	3.8	0.632456	3	2.8	0.788811	5.94	2.40041	1.36527	2.88041	1.94746	1.06833	0.823456	3.77044
01-01-03-02-01-01-17.mp4	AV	Speech	Happy	Strong	Kids	R1	A17	0.4	0.286743	4	3.9	1.28668	3.5	3.3	1.1595	2.88	1.61155	0.929131	1.78576	1.35989	0.83823	0.470987	3.73706
01-01-03-02-01-01-18.mp4	AV	Speech	Happy	Strong	Kids	R1	A18	0.9	0.645172	5	4.7	0.483046	4	3.8	1.39841	7.65	2.08406	1.13754	1.98157	1.93888	1.12467	1.23639	3.77044
01-01-03-02-01-01-19.mp4	AV	Speech	Happy	Strong	Kids	R1	A19	0.7	0.5018	3	3	0.816497	3.5	3.3	1.56702	4.41	1.81985	0.872188	1.56717	0.800071	0.576091	0.40847	3.77044
01-01-03-02-01-01-20.mp4	AV	Speech	Happy	Strong	Kids	R1	A20	1	0.716858	4	4.3	0.674949	2	2.1	1.19722	6.4	2.65132	1.836	2.03922	1.26828	1.02252	0.744041	3.67033
01-01-03-02-01-01-21.mp4	AV	Speech	Happy	Strong	Kids	R1	A21	1	0.716858	3	3.5	0.707107	2	2.3	1.41814	5.8	1.92992	1.4573	2.01775	1.14177	0.920043	0.365959	3.80379
01-01-03-02-01-01-22.mp4	AV	Speech	Happy	Strong	Kids	R1	A22	0.9	0.645172	4	3.8	0.788811	3	3.2	1.0328	6.3	2.84955	2.47601	1.99533	1.54482	1.68117	1.16075	3.73708
01-01-03-02-01-01-23.mp4	AV	Speech	Happy	Strong	Kids	R1	A23	0.5	0.358429	4	4	0.942809	3.5	3.3	1.49443	3.65	2.80175	2.14793	1.86149	1.25874	0.973984	0.851814	3.23658
01-01-03-02-01-01-24.mp4	AV	Speech	Happy	Strong	Kids	R1	A24	0.9	0.645172	3.5	3.7	0.823273	4	3.5	1.43372	6.48	1.94875	1.13828	2.32118	2.08979	1.32537	1.15583	4.004
01-01-03-02-01-02-01.mp4	AV	Speech	Happy	Strong	Kids	R2	A1	1	0.716858	4	3.9	0.567646	4	3.8	1.0328	7.7	2.31604	2.1305	2.11523	2.06097	1.24011	1.14491	3.63696
01-01-03-02-01-02-02.mp4	AV	Speech	Happy	Strong	Kids	R2	A2	1	0.716858	4	4	0.666667	4	3.9	0.737865	7.9	1.98212	0.959856	1.73979	1.40833	0.932714	0.840061	3.67033
01-01-03-02-01-02-03.mp4	AV	Speech	Happy	Strong	Kids	R2	A3	0.5	0.358429	4	3.6	1.26491	2	2.3	1.41814	2.95	3.30118	1.6209	1.49543	0.525668	1.65952	1.40899	4.4044
01-01-03-02-01-02-04.mp4	AV	Speech	Happy	Strong	Kids	R2	A4	0.9	0.645172	4.5	4.3	0.823273	4.5	4.4	0.699206	7.83	1.67009	0.49805	1.63324	1.85078	0.378726	0.230381	3.57023
01-01-03-02-01-02-05.mp4	AV	Speech	Happy	Strong	Kids	R2	A5	1	0.716858	4	4.2	0.918937	4	3.8	1.13529	8	2.35693	1.45006	1.72401	0.817132	0.920341	0.709943	3.87054
01-01-03-02-01-02-06.mp4	AV	Speech	Happy	Strong	Kids	R2	A6	0.9	0.645172	5	4.6	0.699206	4	3.4	1.17379	7.2	2.47973	1.62463	1.30481	0.741491	0.785085	0.545818	3.47012
01-01-03-02-01-02-07.mp4	AV	Speech	Happy	Strong	Kids	R2	A7	0.7	0.5018	4	4.1	0.567646	3.5	3	1.41421	4.97	2.90815	1.36219	2.11394	0.729349	1.28821	1.02045	4.03735
01-01-03-02-01-02-08.mp4	AV	Speech	Happy	Strong	Kids	R2	A8	0.9	0.645172	4	4.2	0.632456	4	3.6	1.07497	7.02	1.70226	0.438408	2.0646	1.39158	0.92945	0.614304	3.9039
01-01-03-02-01-02-09.mp4	AV	Speech	Happy	Strong	Kids	R2	A9	0.8	0.573486	4.5	4.3	0.823273	5	4	1.63299	6.64	3.19562	1.79577	2.20409	0.870901	0.748422	0.357276	4.17083
01-01-03-02-01-02-10.mp4	AV	Speech	Happy	Strong	Kids	R2	A10	0.9	0.645172	5	4.6	0.516398	4	3.9	0.737865	7.65	2.40101	0.851941	1.25842	1.31413	0.980716	1.1256	3.5035
01-01-03-02-01-02-11.mp4	AV	Speech	Happy	Strong	Kids	R2	A11	1	0.716858	4	4.2	0.918937	4	4.1	0.994429	8.3	1.84513	1.344	0.966471	0.698465	1.02792	0.90398	3.63698
01-01-03-02-01-02-12.mp4	AV	Speech	Happy	Strong	Kids	R2	A12	1	0.716858	5	4.8	0.421637	4	3.7	1.05935	8.5	1.86123	1.34566	1.98076	1.28863	0.988981	0.639696	4.13746
01-01-03-02-01-02-13.mp4	AV	Speech	Happy	Strong	Kids	R2	A13	1	0.716858	4	3.8	0.918937	4	3.7	1.41814	7.5	1.55731	0.52347	1.895	0.803778	0.948585	0.425468	3.6036
01-01-03-02-01-02-14.mp4	AV	Speech	Happy	Strong	Kids	R2	A14	1	0.716858	5	4.7	0.483046	3	2.9	1.1005	7.6	2.12846	0.535965	1.25653	1.25622	0.666244	0.63779	3.73706
01-01-03-02-01-02-15.mp4	AV	Speech	Happy	Strong	Kids	R2	A15	0.9	0.645172	3	3.5	0.707107	3	3.5	0.707107	6.3	2.54368	1.43665	1.81378	1.12031	1.61879	1.33693	3.47012
01-01-03-02-01-02-16.mp4	AV	Speech	Happy	Strong	Kids	R2	A16	0.9	0.645172	5	4.7	0.483046	4	3.4	1.3499	7.29	1.86919	1.63913	1.16879	0.392423	0.576738	0.25298	3.57023
01-01-03-02-01-02-17.mp4	AV	Speech	Happy	Strong	Kids	R2	A17	0.5	0.358429	4	4	1.05409	2.5	2.9	1.59513	3.45	2.84485	2.2649	2.15532	1.12018	1.20595	0.836107	4.1041
01-01-03-02-01-02-18.mp4	AV	Speech	Happy	Strong	Kids	R2	A18	0.8	0.573486	5	4.8	0.421637	5	4.4	1.26491	7.36	1.62663	1.36002	1.10827	0.83549	1.22133	1.51737	3.93725
01-01-03-02-01-02-19.mp4	AV	Speech	Happy	Strong	Kids	R2	A19	0.7	0.5018	5	4.3	0.948683	3.5	3.6	1.42984	5.53	2.95031	1.90926	1.55467	1.22123	1.06881	1.1717	3.80379
01-01-03-02-01-02-20.mp4	AV	Speech	Happy	Strong	Kids	R2	A20	0.9	0.645172	4	4.3	0.674949	5	4.2	1.31656	7.65	2.29579	0.939724	1.49088	0.840674	1.09765	1.29959	4.30429
01-01-03-02-01-02-21.mp4	AV	Speech	Happy	Strong	Kids	R2	A21	0.8	0.573486	4	3.9	1.37032	1.5	2	1.41421	4.72	1.61	0.711419	2.11904	1.51021	0.742547	0.608848	3.93727
01-01-03-02-01-02-22.mp4	AV	Speech	Happy	Strong	Kids	R2	A22	0.7	0.5018	4	3.6	0.843274	3	3.2	0.788811	4.76	3.24377	2.29247	1.41113	0.835	1.5766	1.20165	3.83717
01-01-03-02-01-02-23.mp4	AV	Speech	Happy	Strong	Kids	R2	A23	0.4	0.286743	4	3.6	1.07497	4	3.9	0.875595	3	2.21538	1.65184	2.82877	2.36614	1.08046	0.643693	3.20319
01-01-03-02-01-02-24.mp4	AV	Speech	Happy	Strong	Kids	R2	A24	1	0.716858	4	3.9	0.875595	4	3.4	0.843274	7.3	1.88328	1.10145	1.31059	0.806738	0.660827	0.394515	3.77044
01-01-03-02-02-01-01.mp4	AV	Speech	Happy	Strong	Dogs	R1	A1	1	0.716858	4	4.3	0.674949	4.5	3.9	1.44914	8.2	1.54933	1.07417	0.979089	0.825949	0.807078	0.705325	3.93725
01-01-03-02-02-01-02.mp4	AV	Speech	Happy	Strong	Dogs	R1	A2	1	0.716858	4	3.5	0.971825	3.5	3.3	1.41814	6.8	1.99655	1.70045	1.41542	1.14515	0.694923	0.451282	3.70371
01-01-03-02-02-01-03.mp4	AV	Speech	Happy	Strong	Dogs	R1	A3	0.8	0.573486	5	4.9	0.316228	4.5	4	1.1547	7.12	2.31476	1.33267	2.16166	2.08277	1.32607	1.20313	4.13746
01-01-03-02-02-01-04.mp4	AV	Speech	Happy	Strong	Dogs	R1	A4	0.8	0.573486	4	3.9	1.1005	4	3.4	1.50555	5.84	2.73452	1.4577	2.20712	0.989136	0.920239	0.588464	3.6036
01-01-03-02-02-01-05.mp4	AV	Speech	Happy	Strong	Dogs	R1	A5	1	0.716858	5	4.6	0.516398	4	3.9	1.37032	8.5	1.39293	0.99912	1.68908	1.1738	0.605671	0.357524	3.60358
01-01-03-02-02-01-06.mp4	AV	Speech	Happy	Strong	Dogs	R1	A6	0.8	0.573486	5	4.6	0.843274	5	4.3	1.05935	7.12	2.11315	0.899581	1.85319	1.38914	0.759297	0.835141	3.57023
01-01-03-02-02-01-07.mp4	AV	Speech	Happy	Strong	Dogs	R1	A7	1	0.716858	4.5	4.2	0.918937	3	3.3	1.25167	7.5	2.60614	0.861257	1.39305	0.842272	1.33444	0.698509	4.03737
01-01-03-02-02-01-08.mp4	AV	Speech	Happy	Strong	Dogs	R1	A8	0.9	0.645172	5	4.5	0.707107	4.5	4.1	1.1005	7.74	1.68809	1.05699	1.44748	0.990549	1.09533	0.881701	3.83717
01-01-03-02-02-01-09.mp4	AV	Speech	Happy	Strong	Dogs	R1	A9	0.6	0.430115	4	3.6	1.07497	3	3.2	1.13529	4.08	2.28816	1.65128	1.44775	1.18638	0.911939	0.956073	3.57025
01-01-03-02-02-01-10.mp4	AV	Speech	Happy	Strong	Dogs	R1	A10	0.8	0.573486	5	4.5	0.707107	5	4.6	0.516398	7.28	2.05447	1.60658	1.3143	0.792397	0.704003	0.716109	3.73706
01-01-03-02-02-01-11.mp4	AV	Speech	Happy	Strong	Dogs	R1	A11	0.8	0.573486	4	4	0.816497	2.5	2.9	1.37032	5.52	1.64014	1.31631	2.1085	1.22489	0.737203	0.497146	3.87052
01-01-03-02-02-01-12.mp4	AV	Speech	Happy	Strong	Dogs	R1	A12	1	0.716858	3.5	3.7	0.823273	4.5	3.7	1.63639	7.4	1.97689	0.607664	1.41279	1.08058	0.752685	0.586868	3.90392
01-01-03-02-02-01-13.mp4	AV	Speech	Happy	Strong	Dogs	R1	A13	0.4	0.286743	4	3.4	1.50555	4	3.6	1.17379	2.8	2.68164	1.60089	2.16846	0.984792	0.956006	0.455222	3.37002
01-01-03-02-02-01-14.mp4	AV	Speech	Happy	Strong	Dogs	R1	A14	0.7	0.5018	5	4.5	0.707107	3	3.5	1.43372	5.6	1.80782	0.986756	1.5525	0.558775	0.911169	0.59686	3.83717
01-01-03-02-02-01-15.mp4	AV	Speech	Happy	Strong	Dogs	R1	A15	0.9	0.645172	3	3.3	1.25167	4.5	4	1.24722	6.57	2.54445	2.02909	1.94356	1.12097	1.1181	0.693529	3.80379
01-01-03-02-02-01-16.mp4	AV	Speech	Happy	Strong	Dogs	R1	A16	1	0.716858	4	4.2	0.788811	4.5	4	1.24722	8.2	1.73328	0.45238	2.78193	1.06207	1.22018	0.96845	3.77042
01-01-03-02-02-01-17.mp4	AV	Speech	Happy	Strong	Dogs	R1	A17	0.8	0.573486	5	4.6	0.516398	4	3.9	1.19722	6.8	2.43685	1.52023	2.15359	1.64127	1.39761	1.33262	3.73706
01-01-03-02-02-01-18.mp4	AV	Speech	Happy	Strong	Dogs	R1	A18	0.9	0.645172	5	4.9	0.316228	5	4.6	0.699206	8.55	2.16964	1.48868	1.95255	1.94884	1.16681	1.12338	3.77044
01-01-03-02-02-01-19.mp4	AV	Speech	Happy	Strong	Dogs	R1	A19	0.9	0.645172	4	4.1	0.875595	3.5	3.5	1.08012	6.84	2.22402	1.26388	1.3263	1.134	0.604867	0.538126	4.4044
01-01-03-02-02-01-20.mp4	AV	Speech	Happy	Strong	Dogs	R1	A20	0.8	0.573486	5	4.6	0.699206	4	4	1.24722	6.88	2.65348	1.34399	1.56939	1.39586	0.606493	0.529927	3.57025
01-01-03-02-02-01-21.mp4	AV	Speech	Happy	Strong	Dogs	R1	A21	0.9	0.645172	3.5	3.4	1.07497	2	2.2	1.31656	5.04	2.40313	1.0364	2.37652	1.74394	1.05152	0.69756	3.67033
01-01-03-02-02-01-22.mp4	AV	Speech	Happy	Strong	Dogs	R1	A22	0.8	0.573486	4	3.8	0.632456	3	2.9	1.44914	5.36	2.48079	0.87438	1.99594	0.98381	1.11778	0.707138	3.67033
01-01-03-02-02-01-23.mp4	AV	Speech	Happy	Strong	Dogs	R1	A23	0.3	0.215057	4.5	4.3	0.823273	3.5	3.1	1.52388	2.22	2.28164	1.85676	1.29838	1.00575	0.664109	0.483492	3.23656
01-01-03-02-02-01-24.mp4	AV	Speech	Happy	Strong	Dogs	R1	A24	0.9	0.645172	4	4.2	0.918937	4	3.7	1.33749	7.11	2.00439	0.790295	1.30746	0.99551	1.31641	1.26222	3.87054
01-01-03-02-02-02-01.mp4	AV	Speech	Happy	Strong	Dogs	R2	A1	1	0.716858	4	4.2	0.788811	4	3.9	0.994429	8.1	2.48731	1.2936	2.22748	1.12674	1.09186	0.702655	3.93727
01-01-03-02-02-02-02.mp4	AV	Speech	Happy	Strong	Dogs	R2	A2	1	0.716858	4	3.8	1.22927	3.5	3.5	1.35401	7.3	1.41394	0.725964	1.34237	0.926138	0.980042	0.51219	3.87052
01-01-03-02-02-02-03.mp4	AV	Speech	Happy	Strong	Dogs	R2	A3	1	0.716858	4.5	3.9	1.37032	2.5	2.9	1.59513	6.8	1.96059	1.03071	1.67769	1.74526	1.05624	0.843832	3.83717
01-01-03-02-02-02-04.mp4	AV	Speech	Happy	Strong	Dogs	R2	A4	0.8	0.573486	5	4.6	0.516398	4	3.8	1.0328	6.72	2.7965	2.01164	1.30514	0.947459	0.508287	0.245796	3.77042
01-01-03-02-02-02-05.mp4	AV	Speech	Happy	Strong	Dogs	R2	A5	0.8	0.573486	4.5	4.5	0.527046	4	3.8	0.918937	6.64	2.96175	2.36285	2.86193	1.64293	1.02451	0.683482	3.4034
01-01-03-02-02-02-06.mp4	AV	Speech	Happy	Strong	Dogs	R2	A6	0.9	0.645172	5	4.6	0.699206	4	3.7	1.33749	7.47	2.11661	1.07576	1.65954	1.16607	0.931406	0.347138	3.60358
01-01-03-02-02-02-07.mp4	AV	Speech	Happy	Strong	Dogs	R2	A7	1	0.716858	5	4.4	0.843274	4	3.7	1.25167	8.1	2.43822	2.40677	1.70022	0.856413	0.783656	0.877636	3.83717
01-01-03-02-02-02-08.mp4	AV	Speech	Happy	Strong	Dogs	R2	A8	1	0.716858	5	4.5	0.707107	4	3.8	1.54919	8.3	1.64661	1.29504	1.60023	0.705184	0.758408	0.425689	3.93727
01-01-03-02-02-02-09.mp4	AV	Speech	Happy	Strong	Dogs	R2	A9	0.8	0.573486	4	4	1.24722	4.5	3.8	1.47573	6.24	2.6761	1.58345	1.49635	1.3933	0.860786	0.888058	3.57023
01-01-03-02-02-02-10.mp4	AV	Speech	Happy	Strong	Dogs	R2	A10	0.4	0.286743	5	4.4	1.07497	3	3.2	1.68655	3.04	2.758	1.2132	1.80072	0.858238	1.06329	0.58359	3.97065
01-01-03-02-02-02-11.mp4	AV	Speech	Happy	Strong	Dogs	R2	A11	0.9	0.645172	3	3.1	0.737865	3.5	3.6	1.17379	6.03	1.52705	0.607754	1.42486	0.910093	1.20012	0.694171	3.5035
01-01-03-02-02-02-12.mp4	AV	Speech	Happy	Strong	Dogs	R2	A12	1	0.716858	5	4.4	0.843274	4	3.3	1.63639	7.7	2.63016	1.56105	1.94369	0.521055	0.926238	0.517628	3.97063
01-01-03-02-02-02-13.mp4	AV	Speech	Happy	Strong	Dogs	R2	A13	0.8	0.573486	4	3.9	0.567646	4	3.6	0.843274	6	2.38759	1.92002	2.91405	1.49322	1.27635	1.28836	3.33667
01-01-03-02-02-02-14.mp4	AV	Speech	Happy	Strong	Dogs	R2	A14	0.9	0.645172	5	4.8	0.421637	4	3.4	1.57762	7.38	2.065	0.850577	1.16107	0.584486	0.63713	0.48887	3.73706
01-01-03-02-02-02-15.mp4	AV	Speech	Happy	Strong	Dogs	R2	A15	1	0.716858	3	2.9	0.567646	3	3.2	1.13529	6.1	2.30757	1.42271	1.76355	0.958552	0.916432	0.793252	3.37004
01-01-03-02-02-02-16.mp4	AV	Speech	Happy	Strong	Dogs	R2	A16	1	0.716858	5	4.5	0.971825	4.5	3.7	1.70294	8.2	2.25857	0.766238	1.41499	0.704877	0.824797	0.518602	3.80381
01-01-03-02-02-02-17.mp4	AV	Speech	Happy	Strong	Dogs	R2	A17	0.7	0.5018	4	4	0.666667	3	3.1	0.994429	4.97	1.74763	1.38904	1.13897	0.821088	1.00501	0.782192	3.80379
01-01-03-02-02-02-18.mp4	AV	Speech	Happy	Strong	Dogs	R2	A18	0.8	0.573486	5	4.7	0.483046	4.5	4.3	0.948683	7.2	1.87539	0.926883	0.857634	0.475037	0.503741	0.364981	3.83717
01-01-03-02-02-02-19.mp4	AV	Speech	Happy	Strong	Dogs	R2	A19	0.9	0.645172	3	3.2	1.13529	3.5	2.8	1.39841	5.4	1.85573	0.585027	1.6411	0.788627	0.874276	0.608983	4.004
01-01-03-02-02-02-20.mp4	AV	Speech	Happy	Strong	Dogs	R2	A20	0.8	0.573486	5	4.7	0.483046	4	3.7	1.41814	6.72	2.07098	0.543938	1.56171	0.989863	0.421608	0.286745	3.70371
01-01-03-02-02-02-21.mp4	AV	Speech	Happy	Strong	Dogs	R2	A21	1	0.716858	4	4	0.816497	2.5	2.5	1.58114	6.5	1.8031	0.72709	1.85851	0.912115	1.06337	0.990293	3.80379
01-01-03-02-02-02-22.mp4	AV	Speech	Happy	Strong	Dogs	R2	A22	0.6	0.430115	4	3.7	1.1595	3.5	3.3	1.56702	4.2	2.03727	1.34432	1.89803	1.22088	0.662789	0.434026	3.93727
01-01-03-02-02-02-23.mp4	AV	Speech	Happy	Strong	Dogs	R2	A23	0.6	0.430115	5	4.7	0.483046	4.5	3.8	1.61933	5.1	2.23686	1.42985	1.43457	1.94079	0.622426	0.515667	3.23656
01-01-03-02-02-02-24.mp4	AV	Speech	Happy	Strong	Dogs	R2	A24	0.7	0.5018	4	4.4	0.516398	3.5	3.2	1.22927	5.32	2.40769	1.85109	1.64833	0.809549	0.601631	0.30557	3.87054
01-01-04-01-01-01-01.mp4	AV	Speech	Sad	Normal	Kids	R1	A1	0.7	0.481078	3	3.2	0.918937	4	3.7	1.1595	4.83	2.00217	1.70674	1.97988	1.34009	1.24841	0.719711	3.83717
01-01-04-01-01-01-02.mp4	AV	Speech	Sad	Normal	Kids	R1	A2	0.8	0.549804	2.5	2.7	1.33749	2.5	2.8	1.22927	4.4	2.69802	1.27471	1.46365	0.887888	1.32161	0.911781	3.83717
01-01-04-01-01-01-03.mp4	AV	Speech	Sad	Normal	Kids	R1	A3	1	0.687255	4	3.9	0.737865	3	3.2	1.13529	7.1	1.76368	1.04899	1.42333	0.737863	1.12884	0.965876	3.6036
01-01-04-01-01-01-04.mp4	AV	Speech	Sad	Normal	Kids	R1	A4	0.5	0.343627	1	1.9	1.44914	3	3	1.33333	2.45	2.57216	2.42836	1.6075	1.59789	1.02448	0.838135	3.37004
01-01-04-01-01-01-05.mp4	AV	Speech	Sad	Normal	Kids	R1	A5	0.5	0.343627	2.5	3	1.1547	3.5	3.3	1.1595	3.15	2.24616	1.06404	1.83578	1.20871	0.912428	0.763492	3.26994
01-01-04-01-01-01-06.mp4	AV	Speech	Sad	Normal	Kids	R1	A6	1	0.687255	3.5	3.3	1.33749	4	3.5	1.08012	6.8	0.996007	0.653438	1.15912	0.831104	0.784919	0.556195	3.57023
01-01-04-01-01-01-07.mp4	AV	Speech	Sad	Normal	Kids	R1	A7	1	0.687255	4	3.6	1.26491	4	3.6	1.50555	7.2	1.59913	1.40206	1.54364	0.988994	0.898496	0.569247	3.53688
01-01-04-01-01-01-08.mp4	AV	Speech	Sad	Normal	Kids	R1	A8	0.8	0.549804	2.5	2.6	1.50555	4	3.8	1.0328	5.12	2.66036	1.9932	1.81996	1.17724	0.875678	0.617094	4.20421
01-01-04-01-01-01-09.mp4	AV	Speech	Sad	Normal	Kids	R1	A9	0.7	0.481078	3.5	3.5	1.50923	3.5	3.7	1.33749	5.04	2.69639	1.76867	1.75529	1.02187	1.00178	0.844494	3.26994
01-01-04-01-01-01-10.mp4	AV	Speech	Sad	Normal	Kids	R1	A10	0.9	0.618529	3	3.1	1.19722	3	3.6	1.07497	6.03	1.87691	0.958278	1.86734	0.859057	1.11191	0.925522	3.30329
01-01-04-01-01-01-11.mp4	AV	Speech	Sad	Normal	Kids	R1	A11	0.1	0.0687255	3.5	3.4	1.26491	3	3.1	1.1005	0.65	2.81772	2.16699	1.68268	1.40179	0.881804	0.689293	3.33667
01-01-04-01-01-01-12.mp4	AV	Speech	Sad	Normal	Kids	R1	A12	0.8	0.549804	3.5	3.5	0.849837	4	3.8	0.918937	5.84	2.71061	1.5351	2.13684	1.60049	0.75173	0.654204	3.67033
01-01-04-01-01-01-13.mp4	AV	Speech	Sad	Normal	Kids	R1	A13	0.3	0.206176	2.5	3	1.41421	3.5	3	1.41421	1.8	2.90257	2.4294	2.04201	1.1795	1.48031	1.07406	3.57023
01-01-04-01-01-01-14.mp4	AV	Speech	Sad	Normal	Kids	R1	A14	0.1	0.0687255	3	2.8	1.31656	3	3.3	0.823273	0.61	3.78314	2.23618	1.62835	0.759275	1.3493	1.27737	3.73706
01-01-04-01-01-01-15.mp4	AV	Speech	Sad	Normal	Kids	R1	A15	0.1	0.0687255	2.5	2.6	1.26491	3	2.9	1.28668	0.55	2.64899	1.77792	0.89087	0.47172	1.0951	0.829772	3.5035
01-01-04-01-01-01-16.mp4	AV	Speech	Sad	Normal	Kids	R1	A16	0.1	0.0687255	3	2.7	0.948683	3	2.7	1.25167	0.54	2.07845	1.45439	1.40704	1.3184	0.91548	0.668257	3.57023
01-01-04-01-01-01-17.mp4	AV	Speech	Sad	Normal	Kids	R1	A17	0.5	0.343627	3	2.9	1.28668	3.5	3.5	1.35401	3.2	2.96	2.23828	1.21592	0.972097	0.871828	0.66564	3.67033
01-01-04-01-01-01-18.mp4	AV	Speech	Sad	Normal	Kids	R1	A18	0.8	0.549804	3	2.6	0.966092	3	3.4	0.699206	4.8	2.36563	1.78366	1.73941	1.40364	1.14353	1.31797	3.57023
01-01-04-01-01-01-19.mp4	AV	Speech	Sad	Normal	Kids	R1	A19	0.5	0.343627	3	3	1.1547	3	3.4	1.07497	3.2	2.89931	1.51693	2.0081	1.70562	1.31291	1.02478	3.43677
01-01-04-01-01-01-20.mp4	AV	Speech	Sad	Normal	Kids	R1	A20	0.3	0.206176	4	3.4	1.07497	3	3.3	1.33749	2.01	1.53873	0.800187	1.66911	0.898206	0.847928	1.12076	3.60358
01-01-04-01-01-01-21.mp4	AV	Speech	Sad	Normal	Kids	R1	A21	0.1	0.0687255	3	3	0.942809	2.5	2.4	1.17379	0.54	3.35144	1.71216	1.98694	1.20874	1.13938	0.658653	4.30429
01-01-04-01-01-01-22.mp4	AV	Speech	Sad	Normal	Kids	R1	A22	0.1	0.0687255	2	1.9	0.875595	2	2.5	1.2693	0.44	2.50434	1.64989	1.49443	0.920806	1.24378	0.82011	3.6036
01-01-04-01-01-01-23.mp4	AV	Speech	Sad	Normal	Kids	R1	A23	0.7	0.481078	2	2.3	0.948683	3	3.1	0.737865	3.78	3.29767	2.45616	1.44256	0.996715	0.871619	0.590178	3.6036
01-01-04-01-01-01-24.mp4	AV	Speech	Sad	Normal	Kids	R1	A24	0.9	0.618529	3	3.1	1.19722	2	2.8	1.39841	5.31	2.55618	1.98789	1.87376	0.975342	1.20506	0.580531	4.1041
01-01-04-01-01-02-01.mp4	AV	Speech	Sad	Normal	Kids	R2	A1	0.9	0.618529	4	3.5	1.08012	4	3.5	1.08012	6.3	2.0899	1.73322	1.63281	1.2391	1.17876	0.621841	3.57023
01-01-04-01-01-02-02.mp4	AV	Speech	Sad	Normal	Kids	R2	A2	0.7	0.481078	3	3.1	1.28668	4	3.6	0.516398	4.69	3.12144	2.08411	1.96312	1.03175	1.45313	1.01242	3.77044
01-01-04-01-01-02-03.mp4	AV	Speech	Sad	Normal	Kids	R2	A3	0.9	0.618529	3.5	3.6	1.17379	3	3.1	1.19722	6.03	2.34417	2.17125	2.01846	0.932228	1.49864	0.898129	3.57023
01-01-04-01-01-02-04.mp4	AV	Speech	Sad	Normal	Kids	R2	A4	0.8	0.549804	3	3.5	0.707107	3	2.8	1.13529	5.04	2.15238	1.19964	2.36282	1.11025	1.83281	1.16081	3.4034
01-01-04-01-01-02-05.mp4	AV	Speech	Sad	Normal	Kids	R2	A5	0.6	0.412353	3	3.1	1.28668	3	3.1	1.19722	3.72	2.53059	1.82011	1.58344	0.657418	1.56074	1.07942	3.63696
01-01-04-01-01-02-06.mp4	AV	Speech	Sad	Normal	Kids	R2	A6	0.9	0.618529	4	3.9	0.994429	4	3.9	0.994429	7.02	1.65221	0.43985	1.72354	1.77109	0.842246	0.464361	3.6036
01-01-04-01-01-02-07.mp4	AV	Speech	Sad	Normal	Kids	R2	A7	0.9	0.618529	3	3.6	0.843274	4	4.1	0.737865	6.93	1.73165	0.767654	2.03283	1.38074	1.12479	1.2368	3.60358
01-01-04-01-01-02-08.mp4	AV	Speech	Sad	Normal	Kids	R2	A8	0.7	0.481078	3	3.1	1.19722	3	3.3	0.674949	4.48	3.27456	1.83877	1.4516	0.828909	1.23364	0.63512	3.87052
01-01-04-01-01-02-09.mp4	AV	Speech	Sad	Normal	Kids	R2	A9	0.9	0.618529	4	3.6	0.516398	4	4.3	0.674949	7.11	1.71899	0.532046	2.06283	1.39115	1.28338	0.775614	3.43675
01-01-04-01-01-02-10.mp4	AV	Speech	Sad	Normal	Kids	R2	A10	1	0.687255	4	3.4	1.3499	3.5	3.4	1.50555	6.8	2.47745	2.14442	2.2297	1.56699	0.918057	0.866103	3.47012
01-01-04-01-01-02-11.mp4	AV	Speech	Sad	Normal	Kids	R2	A11	0.2	0.137451	3	3.3	1.63639	4	3.6	1.3499	1.38	2.85225	1.9364	1.71595	1.95102	0.866053	0.514807	3.6036
01-01-04-01-01-02-12.mp4	AV	Speech	Sad	Normal	Kids	R2	A12	0.6	0.412353	3	2.9	0.875595	3	3.3	0.948683	3.72	2.13136	1.1872	2.26186	1.80924	1.22771	1.23767	3.60358
01-01-04-01-01-02-13.mp4	AV	Speech	Sad	Normal	Kids	R2	A13	0	0	3	3	0	3	3.1	0.316228	0	2.37767	1.69684	1.55776	0.946253	0.862019	0.948509	3.53685
01-01-04-01-01-02-14.mp4	AV	Speech	Sad	Normal	Kids	R2	A14	0.2	0.137451	2.5	2.9	1.1005	3.5	3.3	0.823273	1.24	2.71735	2.32104	1.52871	1.19065	0.812557	0.817998	3.6036
01-01-04-01-01-02-15.mp4	AV	Speech	Sad	Normal	Kids	R2	A15	0.4	0.274902	3	3.1	1.19722	3	3.1	0.994429	2.48	2.1622	1.63329	2.77811	1.92021	1.27936	1.09444	3.30329
01-01-04-01-01-02-16.mp4	AV	Speech	Sad	Normal	Kids	R2	A16	0.4	0.274902	3	2.4	1.26491	2.5	2.8	1.61933	2.08	3.2597	2.10269	1.26692	1.14004	0.838697	0.729887	3.63696
01-01-04-01-01-02-17.mp4	AV	Speech	Sad	Normal	Kids	R2	A17	0.3	0.206176	2	2.6	1.07497	3	3.3	0.823273	1.77	1.68033	1.07942	2.08194	1.27229	1.25187	1.18695	3.5035
01-01-04-01-01-02-18.mp4	AV	Speech	Sad	Normal	Kids	R2	A18	0.6	0.412353	3	3.2	1.13529	3	2.8	1.0328	3.6	2.25495	1.38144	2.33148	1.5913	1.336	1.36701	3.63696
01-01-04-01-01-02-19.mp4	AV	Speech	Sad	Normal	Kids	R2	A19	0.5	0.343627	3	2.9	0.737865	3	3.1	1.28668	3	3.65744	1.21744	1.85492	1.33713	1.52303	1.60339	3.67033
01-01-04-01-01-02-20.mp4	AV	Speech	Sad	Normal	Kids	R2	A20	0.4	0.274902	3	2.6	0.843274	3	2.9	0.737865	2.2	2.92717	1.22767	1.54549	1.17263	1.23943	1.199	3.5035
01-01-04-01-01-02-21.mp4	AV	Speech	Sad	Normal	Kids	R2	A21	0.2	0.137451	3	2.7	1.1595	2.5	2.8	1.61933	1.1	3.21954	2.1663	1.67016	1.10856	1.03789	0.673307	4.6046
01-01-04-01-01-02-22.mp4	AV	Speech	Sad	Normal	Kids	R2	A22	0.5	0.343627	2	2.5	1.08012	3.5	3.6	0.966092	3.05	1.81696	1.65901	1.29546	0.687583	0.801609	0.630331	3.70371
01-01-04-01-01-02-23.mp4	AV	Speech	Sad	Normal	Kids	R2	A23	0.2	0.137451	3	3.2	1.31656	4	3.4	1.17379	1.32	2.82355	2.47602	1.57728	0.549677	1.30954	1.01988	3.87054
01-01-04-01-01-02-24.mp4	AV	Speech	Sad	Normal	Kids	R2	A24	1	0.687255	4	3.9	1.19722	4	3.9	0.994429	7.8	1.30846	0.68063	1.36878	1.35468	0.894947	0.975851	3.97063
01-01-04-01-02-01-01.mp4	AV	Speech	Sad	Normal	Dogs	R1	A1	0.4	0.274902	4	3.7	1.25167	4	3.8	0.918937	3	1.57564	1.05613	1.57514	1.43163	0.89886	1.00362	3.5035
01-01-04-01-02-01-02.mp4	AV	Speech	Sad	Normal	Dogs	R1	A2	0.4	0.274902	3	2.5	1.17851	3	2.8	1.31656	2.12	1.7298	0.991329	1.61612	0.75682	1.29564	0.604005	3.73706
01-01-04-01-02-01-03.mp4	AV	Speech	Sad	Normal	Dogs	R1	A3	1	0.687255	4	3.9	0.737865	4	3.6	0.843274	7.5	1.06901	0.461056	0.935224	0.755935	0.946489	1.10815	3.57023
01-01-04-01-02-01-04.mp4	AV	Speech	Sad	Normal	Dogs	R1	A4	0.8	0.549804	3.5	3.5	0.527046	3	3.2	0.632456	5.36	2.83358	1.9422	2.21852	1.57725	1.16265	1.24942	3.43677
01-01-04-01-02-01-05.mp4	AV	Speech	Sad	Normal	Dogs	R1	A5	0.3	0.206176	3	2.7	1.33749	3	3.2	0.788811	1.77	2.42898	1.32654	2.08682	1.69991	1.19453	0.619792	3.1031
01-01-04-01-02-01-06.mp4	AV	Speech	Sad	Normal	Dogs	R1	A6	0.7	0.481078	3	2.7	1.05935	3	2.8	0.918937	3.85	1.53893	0.974644	1.8082	1.6377	1.51513	1.2022	3.47015
01-01-04-01-02-01-07.mp4	AV	Speech	Sad	Normal	Dogs	R1	A7	0.5	0.343627	3	3	1.41421	3.5	3.2	1.22927	3.1	2.08362	0.973163	2.5263	1.41357	1.56411	0.975939	3.53688
01-01-04-01-02-01-08.mp4	AV	Speech	Sad	Normal	Dogs	R1	A8	0.6	0.412353	3	3	1.1547	4	3.9	1.1005	4.14	3.17685	1.52511	2.33368	1.89557	1.62688	1.38566	3.57025
01-01-04-01-02-01-09.mp4	AV	Speech	Sad	Normal	Dogs	R1	A9	1	0.687255	2.5	2.8	1.0328	3	2.8	1.31656	5.6	2.29994	0.837884	2.14638	1.39515	1.38265	1.12122	3.4034
01-01-04-01-02-01-10.mp4	AV	Speech	Sad	Normal	Dogs	R1	A10	0.7	0.481078	3	2.7	0.674949	3	3.1	0.994429	4.06	2.07859	1.62883	2.02487	1.2683	1.18729	0.971555	3.53688
01-01-04-01-02-01-11.mp4	AV	Speech	Sad	Normal	Dogs	R1	A11	0.2	0.137451	2.5	2.4	1.17379	3	3	0.942809	1.08	2.80597	2.49031	2.06845	1.46881	1.18576	0.43889	3.53685
01-01-04-01-02-01-12.mp4	AV	Speech	Sad	Normal	Dogs	R1	A12	0.9	0.618529	3	2.9	1.1005	3	3.2	0.918937	5.49	1.69163	1.02886	1.94676	1.65427	1.13057	1.12335	3.67033
01-01-04-01-02-01-13.mp4	AV	Speech	Sad	Normal	Dogs	R1	A13	0.3	0.206176	3	2.7	0.948683	3	3.3	1.25167	1.8	3.22349	1.6058	2.08928	0.769575	1.05799	0.447952	3.43677
01-01-04-01-02-01-14.mp4	AV	Speech	Sad	Normal	Dogs	R1	A14	0.3	0.206176	3	2.9	1.19722	4	3.6	1.07497	1.95	2.19493	1.16426	1.51229	1.20848	0.975937	1.0243	3.6036
01-01-04-01-02-01-15.mp4	AV	Speech	Sad	Normal	Dogs	R1	A15	0.3	0.206176	2	2.4	1.07497	3	3.3	1.41814	1.71	2.2486	1.07251	1.44858	0.850533	1.15457	0.618607	3.30331
01-01-04-01-02-01-16.mp4	AV	Speech	Sad	Normal	Dogs	R1	A16	0.1	0.0687255	2	2.3	0.948683	2.5	2.5	1.2693	0.48	2.38454	1.60948	2.01494	1.79953	1.06306	0.83688	3.40342
01-01-04-01-02-01-17.mp4	AV	Speech	Sad	Normal	Dogs	R1	A17	0.8	0.549804	3.5	3	1.41421	4	3.7	0.948683	5.36	1.99722	1.94945	1.8853	1.88794	1.64278	0.966096	3.57023
01-01-04-01-02-01-18.mp4	AV	Speech	Sad	Normal	Dogs	R1	A18	0.9	0.618529	4	3.8	0.918937	4	4	1.24722	7.02	1.98909	2.28602	1.826	1.35006	0.99281	0.589373	3.53688
01-01-04-01-02-01-19.mp4	AV	Speech	Sad	Normal	Dogs	R1	A19	0.5	0.343627	3	2.9	1.44914	4	3.5	1.2693	3.2	3.56118	1.25924	1.87248	1.64956	1.09704	1.1672	3.16983
01-01-04-01-02-01-20.mp4	AV	Speech	Sad	Normal	Dogs	R1	A20	0.5	0.343627	4	3.6	0.843274	4	4	0.816497	3.8	4.27986	2.29179	1.61184	0.744274	1.57625	1.16931	3.47012
01-01-04-01-02-01-21.mp4	AV	Speech	Sad	Normal	Dogs	R1	A21	0	0	3	3.4	0.843274	3	3.2	1.0328	0	3.61433	2.21991	2.37114	1.70565	1.30713	1.194	4.07075
01-01-04-01-02-01-22.mp4	AV	Speech	Sad	Normal	Dogs	R1	A22	0.7	0.481078	2	2.6	1.17379	3	3	1.05409	3.92	2.86103	1.79927	2.04545	1.56889	1.52268	0.850815	3.67033
01-01-04-01-02-01-23.mp4	AV	Speech	Sad	Normal	Dogs	R1	A23	0.1	0.0687255	3	2.9	1.44914	4	3.7	1.1595	0.66	2.49876	1.13721	1.66061	0.900017	0.782416	0.637663	3.57023
01-01-04-01-02-01-24.mp4	AV	Speech	Sad	Normal	Dogs	R1	A24	0.7	0.481078	3.5	3.1	1.52388	4	3.2	1.75119	4.41	1.90734	0.719677	1.65187	1.1311	0.892413	0.799928	3.53688
01-01-04-01-02-02-01.mp4	AV	Speech	Sad	Normal	Dogs	R2	A1	0.7	0.481078	3	2.9	1.19722	3.5	3.7	1.05935	4.62	2.83375	1.3896	1.78417	1.14895	1.65063	1.47214	3.37004
01-01-04-01-02-02-02.mp4	AV	Speech	Sad	Normal	Dogs	R2	A2	0.4	0.274902	2.5	2.4	1.26491	2.5	2.6	0.966092	2	2.55179	2.08108	1.57018	0.767959	0.853095	0.50181	3.77044
01-01-04-01-02-02-03.mp4	AV	Speech	Sad	Normal	Dogs	R2	A3	1	0.687255	3	3.4	0.843274	3	3.3	1.25167	6.7	3.13416	2.60845	1.99524	0.888605	0.837216	0.398786	3.53688
01-01-04-01-02-02-04.mp4	AV	Speech	Sad	Normal	Dogs	R2	A4	0.6	0.412353	3.5	3.4	1.26491	3.5	3.5	1.35401	4.14	3.9154	2.2764	1.6242	0.639867	0.886728	0.561679	3.47012
01-01-04-01-02-02-05.mp4	AV	Speech	Sad	Normal	Dogs	R2	A5	0.5	0.343627	3	2.9	1.37032	4	3.2	1.54919	3.05	2.8825	1.75321	1.30234	0.622571	0.511889	0.369707	3.70369
01-01-04-01-02-02-06.mp4	AV	Speech	Sad	Normal	Dogs	R2	A6	0.9	0.618529	3	3	0.816497	3	3.1	0.994429	5.49	2.46285	2.13174	2.30488	2.33181	1.02831	0.857376	3.43677
01-01-04-01-02-02-07.mp4	AV	Speech	Sad	Normal	Dogs	R2	A7	0.8	0.549804	2.5	2.8	1.31656	4	3.7	0.948683	5.2	2.43311	2.44647	1.94733	1.33623	0.782242	0.712929	3.87052
01-01-04-01-02-02-08.mp4	AV	Speech	Sad	Normal	Dogs	R2	A8	0.8	0.549804	3	2.9	1.19722	4	3.7	0.948683	5.28	2.38894	2.00227	1.40272	0.566656	0.999936	0.461899	3.6036
01-01-04-01-02-02-09.mp4	AV	Speech	Sad	Normal	Dogs	R2	A9	0.9	0.618529	2	2.9	1.44914	3	3	1.41421	5.31	2.41812	2.06097	2.25749	1.81514	0.984828	0.642976	3.40342
01-01-04-01-02-02-10.mp4	AV	Speech	Sad	Normal	Dogs	R2	A10	0.7	0.481078	3.5	3.5	1.2693	4	3.8	1.39841	5.11	2.03838	1.02585	1.47995	1.26772	1.09024	1.13111	3.80379
01-01-04-01-02-02-11.mp4	AV	Speech	Sad	Normal	Dogs	R2	A11	0.4	0.274902	3	3	0.816497	4	3.6	1.3499	2.64	2.75416	0.889767	2.63372	1.62319	1.40091	1.05536	3.43677
01-01-04-01-02-02-12.mp4	AV	Speech	Sad	Normal	Dogs	R2	A12	0.9	0.618529	3	3.2	0.788811	3	3.4	1.3499	5.94	2.46233	0.926311	1.93899	1.77094	1.20461	1.10947	3.57023
01-01-04-01-02-02-13.mp4	AV	Speech	Sad	Normal	Dogs	R2	A13	0.1	0.0687255	2.5	2.8	1.0328	3	2.9	0.994429	0.57	2.6194	1.51041	1.52057	0.68232	1.07332	1.29052	3.37004
01-01-04-01-02-02-14.mp4	AV	Speech	Sad	Normal	Dogs	R2	A14	0.4	0.274902	3.5	3.3	1.1595	3	3.3	0.948683	2.64	2.06885	1.31706	1.0321	0.839543	0.864445	0.741887	3.53688
01-01-04-01-02-02-15.mp4	AV	Speech	Sad	Normal	Dogs	R2	A15	0.3	0.206176	3.5	3.4	0.699206	2.5	3	1.41421	1.92	1.80024	1.08798	1.4775	0.902774	1.07974	0.748407	3.37002
01-01-04-01-02-02-16.mp4	AV	Speech	Sad	Normal	Dogs	R2	A16	0.4	0.274902	3	3.4	0.843274	3	3.3	0.948683	2.68	1.94154	0.571653	2.25052	1.32912	1.25677	0.98105	3.5035
01-01-04-01-02-02-17.mp4	AV	Speech	Sad	Normal	Dogs	R2	A17	0.7	0.481078	3	3	1.41421	3	3	1.05409	4.2	2.26717	1.39331	1.5421	0.934075	1.12834	1.10444	3.6036
01-01-04-01-02-02-18.mp4	AV	Speech	Sad	Normal	Dogs	R2	A18	0.9	0.618529	3.5	3.3	1.05935	3	2.9	1.44914	5.58	1.61384	0.918378	1.32448	0.853038	0.907646	0.708468	3.63696
01-01-04-01-02-02-19.mp4	AV	Speech	Sad	Normal	Dogs	R2	A19	0.6	0.412353	3	3.3	0.674949	3	3.3	0.948683	3.96	2.81441	1.59792	1.77574	0.743585	0.85115	0.694546	3.67033
01-01-04-01-02-02-20.mp4	AV	Speech	Sad	Normal	Dogs	R2	A20	0.3	0.206176	4	3.3	1.49443	4	4.2	0.632456	2.25	2.87074	1.94177	1.55946	0.884383	0.684645	0.634744	3.37004
01-01-04-01-02-02-21.mp4	AV	Speech	Sad	Normal	Dogs	R2	A21	0.1	0.0687255	3	2.9	1.37032	4	3.7	1.05935	0.66	2.83837	2.03971	2.96444	1.97492	1.67604	1.25355	4.20419
01-01-04-01-02-02-22.mp4	AV	Speech	Sad	Normal	Dogs	R2	A22	0.5	0.343627	3	3	1.1547	3.5	3.2	1.39841	3.1	1.35511	0.826925	1.0436	0.901601	0.713486	0.705918	3.70371
01-01-04-01-02-02-23.mp4	AV	Speech	Sad	Normal	Dogs	R2	A23	0.7	0.481078	2	2.2	1.39841	3	3.2	1.22927	3.78	2.95617	1.92409	1.07971	0.724424	1.62126	0.893296	3.67033
01-01-04-01-02-02-24.mp4	AV	Speech	Sad	Normal	Dogs	R2	A24	0.4	0.274902	3.5	3.5	0.849837	3	3.1	1.28668	2.64	2.64836	1.622	1.58337	1.46103	1.02952	1.2258	3.83717
01-01-04-02-01-01-01.mp4	AV	Speech	Sad	Strong	Kids	R1	A1	0.6	0.412353	3	3.3	0.823273	4	3.7	0.674949	4.2	2.23259	1.59598	1.81427	1.45213	0.729637	0.443895	3.80379
01-01-04-02-01-01-02.mp4	AV	Speech	Sad	Strong	Kids	R1	A2	0.8	0.549804	4	3.6	1.17379	3.5	3.6	0.966092	5.76	1.3602	0.542473	2.31309	1.55453	0.986024	0.81793	3.73708
01-01-04-02-01-01-03.mp4	AV	Speech	Sad	Strong	Kids	R1	A3	0.7	0.481078	4	3.5	1.50923	4	3.2	1.39841	4.69	2.29982	1.28647	1.6394	0.861708	0.846836	0.913259	3.77044
01-01-04-02-01-01-04.mp4	AV	Speech	Sad	Strong	Kids	R1	A4	0.9	0.618529	4	3.9	0.737865	3	3.3	1.25167	6.48	2.003	1.4689	1.81196	1.08052	1.36326	0.973274	3.67033
01-01-04-02-01-01-05.mp4	AV	Speech	Sad	Strong	Kids	R1	A5	1	0.687255	4	4.2	0.788811	3.5	3.4	1.26491	7.6	1.61934	0.612226	1.65493	1.84382	0.94611	0.65369	3.53685
01-01-04-02-01-01-06.mp4	AV	Speech	Sad	Strong	Kids	R1	A6	1	0.687255	5	5	0	4	4.1	1.19722	9.1	1.84751	0.629677	1.37173	0.558673	1.46354	1.08342	4.20419
01-01-04-02-01-01-07.mp4	AV	Speech	Sad	Strong	Kids	R1	A7	0.9	0.618529	4	4.2	0.788811	4	3.9	1.19722	7.29	2.0214	0.616959	2.04332	1.50159	1.48442	1.31184	3.93725
01-01-04-02-01-01-08.mp4	AV	Speech	Sad	Strong	Kids	R1	A8	0.7	0.481078	4	4.1	0.567646	4	3.6	1.3499	5.39	2.41786	1.91473	2.2613	1.41198	1.35142	0.891957	3.77042
01-01-04-02-01-01-09.mp4	AV	Speech	Sad	Strong	Kids	R1	A9	1	0.687255	4.5	4.5	0.527046	4	3.9	1.1005	8.4	1.56347	0.861746	1.83897	0.977224	1.11698	0.655945	3.93727
01-01-04-02-01-01-10.mp4	AV	Speech	Sad	Strong	Kids	R1	A10	1	0.687255	4	3.9	1.1005	3	3.5	1.43372	7.4	1.40528	0.696548	1.7882	1.05613	0.901554	0.939373	3.5035
01-01-04-02-01-01-11.mp4	AV	Speech	Sad	Strong	Kids	R1	A11	1	0.687255	4	4.3	0.674949	4	4.2	0.788811	8.5	2.14795	1.40821	1.90934	1.13364	1.19487	1.4127	3.33667
01-01-04-02-01-01-12.mp4	AV	Speech	Sad	Strong	Kids	R1	A12	0.5	0.343627	4	3.6	1.07497	3.5	3.4	1.07497	3.5	2.99524	1.57375	1.7599	1.12766	0.713181	0.864021	3.87052
01-01-04-02-01-01-13.mp4	AV	Speech	Sad	Strong	Kids	R1	A13	0.6	0.412353	3	3.3	0.483046	4	3.5	0.707107	4.08	2.96346	1.29447	1.82421	1.61279	0.725854	0.656076	3.33667
01-01-04-02-01-01-14.mp4	AV	Speech	Sad	Strong	Kids	R1	A14	0.9	0.618529	3.5	3.7	0.823273	4	3.8	0.788811	6.75	1.73284	0.459983	1.84026	1.85879	0.976941	0.827479	3.87052
01-01-04-02-01-01-15.mp4	AV	Speech	Sad	Strong	Kids	R1	A15	0.7	0.481078	3	3	1.1547	3.5	3.6	0.966092	4.62	2.94675	1.73005	2.37871	1.62354	1.41227	0.984632	3.26992
01-01-04-02-01-01-16.mp4	AV	Speech	Sad	Strong	Kids	R1	A16	0.9	0.618529	3.5	3.8	1.13529	4	3.8	1.13529	6.84	1.85345	0.688304	1.14587	0.748838	0.956362	0.503892	3.73706
01-01-04-02-01-01-17.mp4	AV	Speech	Sad	Strong	Kids	R1	A17	0.2	0.137451	4	3.8	0.421637	3	3.2	1.13529	1.4	2.20862	1.07363	2.58633	1.62651	0.924147	0.641036	3.67033
01-01-04-02-01-01-18.mp4	AV	Speech	Sad	Strong	Kids	R1	A18	1	0.687255	4	4.2	0.788811	4	4	0.942809	8.2	1.37292	0.833677	2.04939	1.07746	1.04089	0.766826	3.80379
01-01-04-02-01-01-19.mp4	AV	Speech	Sad	Strong	Kids	R1	A19	1	0.687255	5	4.6	0.516398	4.5	4.1	1.1005	8.7	1.75172	0.898522	1.71214	1.50892	1.11028	1.07845	4.004
01-01-04-02-01-01-20.mp4	AV	Speech	Sad	Strong	Kids	R1	A20	1	0.687255	4	4	0.666667	4	3.7	1.33749	7.7	2.41974	2.01097	1.80339	0.600214	0.842691	0.532098	3.77044
01-01-04-02-01-01-21.mp4	AV	Speech	Sad	Strong	Kids	R1	A21	0.9	0.618529	4	3.8	1.22927	2	2.5	1.43372	5.67	2.66677	1.98202	2.06266	0.836605	1.21993	0.645324	4.17083
01-01-04-02-01-01-22.mp4	AV	Speech	Sad	Strong	Kids	R1	A22	0.4	0.274902	3	2.9	0.994429	2.5	2.6	0.966092	2.2	2.97141	2.20723	1.99155	1.74571	0.757394	0.523	3.73706
01-01-04-02-01-01-23.mp4	AV	Speech	Sad	Strong	Kids	R1	A23	0.8	0.549804	3.5	3.4	0.966092	3.5	3.5	1.17851	5.52	2.66318	1.45919	2.77666	1.71492	1.42004	0.82169	4.27094
01-01-04-02-01-01-24.mp4	AV	Speech	Sad	Strong	Kids	R1	A24	0.9	0.618529	3	3.6	0.843274	3	3.1	1.28668	6.03	2.30837	1.32303	1.71217	1.04391	0.638969	0.40906	4.4044
01-01-04-02-01-02-01.mp4	AV	Speech	Sad	Strong	Kids	R2	A1	0.9	0.618529	4	3.8	1.39841	4	3.6	1.50555	6.66	2.31072	1.07423	1.76873	0.802786	1.02626	1.01107	3.70371
01-01-04-02-01-02-02.mp4	AV	Speech	Sad	Strong	Kids	R2	A2	0.5	0.343627	3	2.9	0.994429	3.5	3.6	0.966092	3.25	2.58664	1.39968	2.3457	1.56492	1.13526	1.05691	3.77042
01-01-04-02-01-02-03.mp4	AV	Speech	Sad	Strong	Kids	R2	A3	1	0.687255	4	4.3	0.674949	4	3.9	1.19722	8.2	1.59822	1.09812	1.16093	0.641928	0.850762	1.00376	3.83717
01-01-04-02-01-02-04.mp4	AV	Speech	Sad	Strong	Kids	R2	A4	1	0.687255	3.5	3.5	1.08012	2.5	2.5	1.35401	6	1.77892	1.3923	1.63377	1.24929	0.985453	0.891596	3.77044
01-01-04-02-01-02-05.mp4	AV	Speech	Sad	Strong	Kids	R2	A5	0.9	0.618529	4.5	4.2	0.918937	4.5	3.9	1.44914	7.29	2.30405	1.77457	2.14724	1.75036	1.23091	1.3369	3.26994
01-01-04-02-01-02-06.mp4	AV	Speech	Sad	Strong	Kids	R2	A6	1	0.687255	5	4.6	0.699206	4	4	1.05409	8.6	2.67286	2.32824	1.56621	1.11974	1.86718	1.34171	4.1041
01-01-04-02-01-02-07.mp4	AV	Speech	Sad	Strong	Kids	R2	A7	0.9	0.618529	4	4.2	0.788811	4	3.9	0.875595	7.29	2.10848	1.27617	2.34499	1.58795	1.69999	1.53169	3.83717
01-01-04-02-01-02-08.mp4	AV	Speech	Sad	Strong	Kids	R2	A8	1	0.687255	4	4.2	0.632456	4	3.9	1.19722	8.1	1.44838	0.5586	1.6038	0.584485	0.793074	0.628726	3.93727
01-01-04-02-01-02-09.mp4	AV	Speech	Sad	Strong	Kids	R2	A9	1	0.687255	5	4.3	1.05935	4	3.7	1.41814	8	1.76739	0.829251	1.21835	0.691613	1.23179	0.87508	3.9039
01-01-04-02-01-02-10.mp4	AV	Speech	Sad	Strong	Kids	R2	A10	1	0.687255	4	3.8	1.31656	3.5	3.7	1.05935	7.5	2.20516	1.01762	2.06523	1.9898	0.564471	0.452129	3.57023
01-01-04-02-01-02-11.mp4	AV	Speech	Sad	Strong	Kids	R2	A11	0.7	0.481078	4	4.1	0.994429	3	2.9	0.994429	4.9	1.78306	0.709162	1.88798	1.09431	1.19404	1.08897	3.6036
01-01-04-02-01-02-12.mp4	AV	Speech	Sad	Strong	Kids	R2	A12	0.5	0.343627	4	4.1	0.875595	4	3.9	0.875595	4	2.42468	1.67776	2.34521	2.02542	0.730312	0.728463	3.77044
01-01-04-02-01-02-13.mp4	AV	Speech	Sad	Strong	Kids	R2	A13	0.4	0.274902	3	2.7	0.948683	3	3	0.942809	2.28	2.87596	2.4772	1.91997	1.11878	1.15677	0.922355	3.30329
01-01-04-02-01-02-14.mp4	AV	Speech	Sad	Strong	Kids	R2	A14	0.9	0.618529	4	4	0.666667	4	3.9	0.567646	7.11	1.29046	0.807573	2.47402	1.78624	1.81058	1.7291	3.67033
01-01-04-02-01-02-15.mp4	AV	Speech	Sad	Strong	Kids	R2	A15	0.8	0.549804	3.5	3.5	1.17851	4	3.7	1.33749	5.76	1.39529	0.721339	1.27532	1.08779	1.13009	0.691427	3.4034
01-01-04-02-01-02-16.mp4	AV	Speech	Sad	Strong	Kids	R2	A16	0.9	0.618529	4	3.7	0.674949	3	3.1	1.1005	6.12	2.84038	2.26854	2.39993	1.19691	1.42485	1.14257	3.80381
01-01-04-02-01-02-17.mp4	AV	Speech	Sad	Strong	Kids	R2	A17	0.8	0.549804	3	3.4	0.516398	4	3.9	0.737865	5.84	1.79826	1.16719	1.45328	1.50232	0.673746	0.475843	3.70371
01-01-04-02-01-02-18.mp4	AV	Speech	Sad	Strong	Kids	R2	A18	1	0.687255	5	4.2	1.31656	3	2.9	1.44914	7.1	2.39553	1.88024	1.46285	1.00253	1.50908	1.19372	3.83717
01-01-04-02-01-02-19.mp4	AV	Speech	Sad	Strong	Kids	R2	A19	1	0.687255	4	4.2	0.788811	4	3.7	1.49443	7.9	1.45537	0.670491	2.23136	1.61594	0.769179	0.730672	3.70371
01-01-04-02-01-02-20.mp4	AV	Speech	Sad	Strong	Kids	R2	A20	0.8	0.549804	4	4.1	0.875595	4	3.6	0.843274	6.16	3.01593	1.37053	1.72556	1.12903	0.71256	0.431951	4.23756
01-01-04-02-01-02-21.mp4	AV	Speech	Sad	Strong	Kids	R2	A21	0.9	0.618529	4	3.4	1.07497	2	2	1.05409	4.86	2.54101	1.45235	2.06903	0.739106	1.18383	0.929857	4.27092
01-01-04-02-01-02-22.mp4	AV	Speech	Sad	Strong	Kids	R2	A22	0.5	0.343627	3	3.1	1.1005	2	2.5	1.17851	2.8	2.77581	1.14441	1.80015	1.49376	0.94299	0.825293	3.63698
01-01-04-02-01-02-23.mp4	AV	Speech	Sad	Strong	Kids	R2	A23	0.7	0.481078	4	3.6	1.07497	3	2.7	1.25167	4.41	2.43524	2.02968	1.51708	1.13828	0.996567	1.04269	4.37102
01-01-04-02-01-02-24.mp4	AV	Speech	Sad	Strong	Kids	R2	A24	0.9	0.618529	4	3.9	1.1005	2.5	2.8	1.0328	6.03	2.61093	1.52723	1.56022	1.17742	1.42412	1.1411	4.57125
01-01-04-02-02-01-01.mp4	AV	Speech	Sad	Strong	Dogs	R1	A1	1	0.687255	3.5	3.3	1.1595	2.5	3	1.24722	6.3	2.15195	1.03527	1.72881	1.10724	1.37556	1.25592	3.73708
01-01-04-02-02-01-02.mp4	AV	Speech	Sad	Strong	Dogs	R1	A2	1	0.687255	3	3.2	0.421637	4	3.6	0.699206	6.8	3.04308	2.70636	2.12835	1.57485	1.2182	1.13605	3.70369
01-01-04-02-02-01-03.mp4	AV	Speech	Sad	Strong	Dogs	R1	A3	1	0.687255	5	4.8	0.421637	3	3	1.24722	7.8	1.38839	0.611223	2.18603	1.20863	1.46521	1.5147	3.47012
01-01-04-02-02-01-04.mp4	AV	Speech	Sad	Strong	Dogs	R1	A4	0.9	0.618529	4	4.3	0.674949	4	3.6	1.07497	7.11	1.81883	0.753769	1.85987	0.896445	1.57125	1.24445	3.77044
01-01-04-02-02-01-05.mp4	AV	Speech	Sad	Strong	Dogs	R1	A5	0.8	0.549804	5	4.4	0.843274	5	4.5	0.707107	7.12	1.96204	1.38863	1.26022	0.942234	0.920469	0.972416	3.26992
01-01-04-02-02-01-06.mp4	AV	Speech	Sad	Strong	Dogs	R1	A6	0.9	0.618529	5	4.6	0.699206	5	4.1	1.52388	7.83	2.41844	1.49225	0.932123	0.609605	0.786301	0.798013	4.60458
01-01-04-02-02-01-07.mp4	AV	Speech	Sad	Strong	Dogs	R1	A7	1	0.687255	4.5	4.4	0.699206	4.5	4.2	1.0328	8.6	2.14427	1.51287	1.38654	0.999528	1.11076	1.044	3.63698
01-01-04-02-02-01-08.mp4	AV	Speech	Sad	Strong	Dogs	R1	A8	0.9	0.618529	4	3.8	0.632456	4	4	1.05409	7.02	1.93751	0.923162	1.95564	0.840578	1.04833	0.651471	3.67033
01-01-04-02-02-01-09.mp4	AV	Speech	Sad	Strong	Dogs	R1	A9	1	0.687255	4.5	4.3	0.823273	4	3.6	1.26491	7.9	1.49915	0.521274	0.905394	0.438646	0.636762	0.383927	3.63698
01-01-04-02-02-01-10.mp4	AV	Speech	Sad	Strong	Dogs	R1	A10	0.7	0.481078	4	4.1	0.737865	3	3	1.24722	4.97	1.76504	0.881065	1.61224	1.03481	0.911125	0.682114	3.67033
01-01-04-02-02-01-11.mp4	AV	Speech	Sad	Strong	Dogs	R1	A11	1	0.687255	3.5	3.8	0.918937	4	3.6	0.843274	7.4	1.98795	1.31428	2.51103	1.05829	1.4525	0.541021	3.37004
01-01-04-02-02-01-12.mp4	AV	Speech	Sad	Strong	Dogs	R1	A12	0.6	0.412353	3.5	3.6	1.17379	3	3.3	1.41814	4.14	2.58656	1.78849	1.45689	0.927574	0.607682	0.399323	3.80379
01-01-04-02-02-01-13.mp4	AV	Speech	Sad	Strong	Dogs	R1	A13	0.6	0.412353	4	3.6	1.3499	4	3.8	1.39841	4.44	2.33457	1.30012	1.39155	1.46507	0.606779	0.622791	3.43677
01-01-04-02-02-01-14.mp4	AV	Speech	Sad	Strong	Dogs	R1	A14	0.7	0.481078	3	3.4	0.516398	4	3.7	1.25167	4.97	2.56942	1.48616	2.41049	1.50353	0.988695	0.914815	3.67033
01-01-04-02-02-01-15.mp4	AV	Speech	Sad	Strong	Dogs	R1	A15	0.6	0.412353	3	3.1	0.875595	3	3.4	0.966092	3.9	1.92107	1.55196	1.24302	0.818419	1.02007	1.10033	3.53688
01-01-04-02-02-01-16.mp4	AV	Speech	Sad	Strong	Dogs	R1	A16	0.6	0.412353	5	4.2	1.31656	4	4	1.24722	4.92	1.60782	0.687225	1.10629	0.868865	0.826111	0.488991	3.87054
01-01-04-02-02-01-17.mp4	AV	Speech	Sad	Strong	Dogs	R1	A17	0.3	0.206176	3	2.9	1.1005	4	3.7	0.948683	1.98	3.10377	1.9883	2.01633	2.04963	1.22705	0.767419	3.6036
01-01-04-02-02-01-18.mp4	AV	Speech	Sad	Strong	Dogs	R1	A18	0.8	0.549804	4	3.8	1.0328	3.5	3.3	1.56702	5.68	2.0075	1.0522	2.4007	1.61855	1.09293	1.16258	4.13748
01-01-04-02-02-01-19.mp4	AV	Speech	Sad	Strong	Dogs	R1	A19	0.9	0.618529	4	4.1	0.737865	4	3.8	1.0328	7.11	1.97715	0.819316	1.39075	0.553758	1.36792	1.09021	3.40342
01-01-04-02-02-01-20.mp4	AV	Speech	Sad	Strong	Dogs	R1	A20	1	0.687255	3.5	3.4	1.26491	3.5	3.2	1.61933	6.6	1.65857	0.856288	2.07107	1.8006	1.21258	1.34219	3.80381
01-01-04-02-02-01-21.mp4	AV	Speech	Sad	Strong	Dogs	R1	A21	0.8	0.549804	3	2.8	1.13529	2	2.3	1.41814	4.08	2.76257	1.86063	1.69499	0.693339	0.885683	0.675115	4.27094
01-01-04-02-02-01-22.mp4	AV	Speech	Sad	Strong	Dogs	R1	A22	0.6	0.412353	3	3.3	1.05935	4	3.7	1.33749	4.2	2.00005	1.26015	1.78427	1.35091	0.748576	0.50494	3.73708
01-01-04-02-02-01-23.mp4	AV	Speech	Sad	Strong	Dogs	R1	A23	0.5	0.343627	3	2.9	1.1005	3	2.9	0.875595	2.9	2.60854	1.70043	1.67649	1.24031	0.757645	0.584216	3.93727
01-01-04-02-02-01-24.mp4	AV	Speech	Sad	Strong	Dogs	R1	A24	1	0.687255	4	3.9	0.875595	4	3.5	1.17851	7.4	2.1663	1.1682	2.24292	1.62899	1.19959	1.42589	4.20421
01-01-04-02-02-02-01.mp4	AV	Speech	Sad	Strong	Dogs	R2	A1	0.9	0.618529	4	4.1	0.994429	4.5	4.1	1.1005	7.38	2.33629	2.25688	1.38035	0.624634	0.966636	0.83133	3.73706
01-01-04-02-02-02-02.mp4	AV	Speech	Sad	Strong	Dogs	R2	A2	0.8	0.549804	4	3.6	0.843274	3.5	3.7	0.823273	5.84	1.5368	0.584671	1.58993	1.09977	1.22022	0.852933	3.67033
01-01-04-02-02-02-03.mp4	AV	Speech	Sad	Strong	Dogs	R2	A3	1	0.687255	5	4.7	0.483046	4.5	4.3	0.823273	9	2.22121	1.5121	1.09698	0.843535	0.715569	0.746971	3.70369
01-01-04-02-02-02-04.mp4	AV	Speech	Sad	Strong	Dogs	R2	A4	1	0.687255	4.5	4.3	0.823273	5	4.5	0.707107	8.8	1.40868	0.775715	0.97771	1.03593	0.527342	0.526763	3.77044
01-01-04-02-02-02-05.mp4	AV	Speech	Sad	Strong	Dogs	R2	A5	1	0.687255	4	4.3	0.674949	4	3.7	0.948683	8	1.69737	0.914952	1.20691	0.591709	1.49787	0.932413	3.13648
01-01-04-02-02-02-06.mp4	AV	Speech	Sad	Strong	Dogs	R2	A6	1	0.687255	5	4.5	0.971825	4	4	0.471405	8.5	2.11608	0.912297	1.74802	0.851497	0.778413	0.548598	4.03735
01-01-04-02-02-02-07.mp4	AV	Speech	Sad	Strong	Dogs	R2	A7	1	0.687255	4	4.1	0.316228	3	3.3	0.948683	7.4	1.61717	1.14663	1.44294	0.874319	0.693459	0.416114	3.83717
01-01-04-02-02-02-08.mp4	AV	Speech	Sad	Strong	Dogs	R2	A8	0.6	0.412353	3.5	3.7	0.823273	4.5	4	1.1547	4.62	1.96466	0.772828	1.7665	0.735439	1.59269	1.23834	3.70371
01-01-04-02-02-02-09.mp4	AV	Speech	Sad	Strong	Dogs	R2	A9	1	0.687255	5	4.6	0.699206	4	3.9	1.28668	8.5	1.39391	0.913747	1.79376	1.11509	0.780004	0.571057	3.87054
01-01-04-02-02-02-10.mp4	AV	Speech	Sad	Strong	Dogs	R2	A10	0.9	0.618529	3.5	3.5	0.527046	3	3.1	0.875595	5.94	1.77264	0.887339	2.36233	1.79836	1.3548	1.12099	3.57023
01-01-04-02-02-02-11.mp4	AV	Speech	Sad	Strong	Dogs	R2	A11	1	0.687255	4.5	4.4	0.699206	3.5	3.3	1.41814	7.7	1.43605	1.0772	1.77159	0.995356	0.941977	0.455311	3.33667
01-01-04-02-02-02-12.mp4	AV	Speech	Sad	Strong	Dogs	R2	A12	0.2	0.137451	4	4.1	0.567646	3	3.1	0.737865	1.44	4.28759	1.9443	1.94682	1.39538	1.47811	1.28456	3.87054
01-01-04-02-02-02-13.mp4	AV	Speech	Sad	Strong	Dogs	R2	A13	0.4	0.274902	3	2.8	1.22927	3.5	3	1.1547	2.32	3.21005	2.28272	1.78261	1.60492	1.23436	1.13895	3.20319
01-01-04-02-02-02-14.mp4	AV	Speech	Sad	Strong	Dogs	R2	A14	0.8	0.549804	4	3.5	1.2693	3.5	3.4	1.17379	5.52	1.98866	1.14632	1.94533	1.24832	0.846772	0.794901	3.90392
01-01-04-02-02-02-15.mp4	AV	Speech	Sad	Strong	Dogs	R2	A15	0.8	0.549804	3.5	3.7	0.823273	3.5	3.3	1.41814	5.6	2.23775	1.17345	1.9922	1.47116	1.12152	0.474679	3.43677
01-01-04-02-02-02-16.mp4	AV	Speech	Sad	Strong	Dogs	R2	A16	0.7	0.481078	3	3.4	1.17379	3.5	3.2	1.0328	4.62	2.86836	1.54861	2.25941	1.65363	1.33815	0.988494	3.73706
01-01-04-02-02-02-17.mp4	AV	Speech	Sad	Strong	Dogs	R2	A17	0.2	0.137451	3	3.2	1.13529	3	3.2	0.918937	1.28	2.45145	1.4904	1.59275	0.72244	0.703089	0.545214	3.57023
01-01-04-02-02-02-18.mp4	AV	Speech	Sad	Strong	Dogs	R2	A18	1	0.687255	4	4.2	0.632456	4	4	1.1547	8.2	2.61241	1.83537	1.47866	0.878351	1.45809	1.63192	3.83717
01-01-04-02-02-02-19.mp4	AV	Speech	Sad	Strong	Dogs	R2	A19	1	0.687255	4	4.2	0.788811	3	3	0.942809	7.2	1.76571	1.38304	1.34707	2.08489	1.13607	1.08184	3.73708
01-01-04-02-02-02-20.mp4	AV	Speech	Sad	Strong	Dogs	R2	A20	0.9	0.618529	5	4.7	0.483046	3.5	3.5	1.35401	7.38	1.64185	0.843878	1.477	0.980721	1.05887	1.01474	3.97063
01-01-04-02-02-02-21.mp4	AV	Speech	Sad	Strong	Dogs	R2	A21	0.8	0.549804	3	3.3	1.05935	2	2.4	1.3499	4.56	2.29585	1.29456	2.00378	1.4938	0.780086	0.557549	4.13748
01-01-04-02-02-02-22.mp4	AV	Speech	Sad	Strong	Dogs	R2	A22	0.3	0.206176	2.5	2.5	0.849837	2	2	1.05409	1.35	2.48973	1.40618	2.45551	1.97538	0.78624	0.548551	3.83717
01-01-04-02-02-02-23.mp4	AV	Speech	Sad	Strong	Dogs	R2	A23	0.6	0.412353	4	3.5	0.971825	4	3.6	1.50555	4.26	2.04258	0.800975	1.77023	0.959632	1.2737	0.826507	4.73806
01-01-04-02-02-02-24.mp4	AV	Speech	Sad	Strong	Dogs	R2	A24	0.8	0.549804	3	3	0.816497	3	2.7	0.948683	4.56	2.5809	1.76487	1.21065	0.789217	0.684069	0.472565	4.67133
01-01-05-01-01-01-01.mp4	AV	Speech	Angry	Normal	Kids	R1	A1	0.9	0.710654	3.5	3.5	0.849837	4	3.7	0.948683	6.48	1.66895	0.745349	1.71973	1.76852	1.28697	1.04931	3.87054
01-01-05-01-01-01-02.mp4	AV	Speech	Angry	Normal	Kids	R1	A2	0.5	0.394808	3.5	3.2	1.22927	3.5	3.1	1.19722	3.15	3.04967	2.66732	1.69268	0.865965	1.17927	0.8471	3.67033
01-01-05-01-01-01-03.mp4	AV	Speech	Angry	Normal	Kids	R1	A3	0.9	0.710654	3.5	3.4	1.26491	4.5	4.2	1.22927	6.84	1.97232	1.46914	0.990447	0.677933	0.830057	0.839919	4.004
01-01-05-01-01-01-04.mp4	AV	Speech	Angry	Normal	Kids	R1	A4	0.8	0.631693	3	3.4	1.07497	3	3	1.24722	5.12	2.0854	1.46191	1.95971	1.40886	1.31539	0.906515	3.70371
01-01-05-01-01-01-05.mp4	AV	Speech	Angry	Normal	Kids	R1	A5	0.9	0.710654	3	3.3	1.49443	3	3.1	1.44914	5.76	2.40172	1.59547	2.22027	2.26819	1.22723	0.790055	3.87054
01-01-05-01-01-01-06.mp4	AV	Speech	Angry	Normal	Kids	R1	A6	0.8	0.631693	4	4.4	0.516398	4	3.9	0.994429	6.64	2.21594	1.92514	1.51965	1.03342	1.13121	0.795391	3.77044
01-01-05-01-01-01-07.mp4	AV	Speech	Angry	Normal	Kids	R1	A7	0.9	0.710654	4.5	4.4	0.699206	3.5	3.6	0.699206	7.2	2.16608	1.0431	1.75466	1.08462	1.25181	1.17465	4.004
01-01-05-01-01-01-08.mp4	AV	Speech	Angry	Normal	Kids	R1	A8	0.1	0.0789616	5	4.5	0.707107	4	4.3	0.674949	0.88	2.7379	1.63203	2.17351	1.87675	1.60857	1.18662	3.70371
01-01-05-01-01-01-09.mp4	AV	Speech	Angry	Normal	Kids	R1	A9	0.9	0.710654	4	4	1.05409	4	3.6	1.57762	6.84	2.16789	1.2153	1.27374	0.830597	0.819914	0.723233	3.57023
01-01-05-01-01-01-10.mp4	AV	Speech	Angry	Normal	Kids	R1	A10	0.5	0.394808	4	3.6	1.07497	4	3.7	0.948683	3.65	2.42463	0.986048	1.25144	0.906476	1.10979	0.635741	3.9039
01-01-05-01-01-01-11.mp4	AV	Speech	Angry	Normal	Kids	R1	A11	0.8	0.631693	3	2.8	1.13529	4	3.5	1.08012	5.04	1.5957	0.643783	1.63354	1.43159	1.04767	1.08234	3.6036
01-01-05-01-01-01-12.mp4	AV	Speech	Angry	Normal	Kids	R1	A12	1	0.789616	4	3.7	0.674949	4	3.9	1.1005	7.6	2.11508	0.947769	1.49614	0.672244	1.06909	0.850207	4.27094
01-01-05-01-01-01-13.mp4	AV	Speech	Angry	Normal	Kids	R1	A13	0.9	0.710654	3	2.9	0.875595	3	3.4	1.26491	5.67	2.77668	1.99781	1.71949	1.14816	1.3325	1.10903	3.43677
01-01-05-01-01-01-14.mp4	AV	Speech	Angry	Normal	Kids	R1	A14	0.8	0.631693	4	4.2	0.632456	4	3.6	1.26491	6.24	2.09185	1.8565	2.24377	1.52855	0.869633	0.759622	3.60358
01-01-05-01-01-01-15.mp4	AV	Speech	Angry	Normal	Kids	R1	A15	0.8	0.631693	3	3.1	1.44914	4	3.7	1.25167	5.44	2.44225	2.05443	1.90519	1.60523	1.20853	0.867709	3.63698
01-01-05-01-01-01-16.mp4	AV	Speech	Angry	Normal	Kids	R1	A16	0.9	0.710654	4	4.2	0.632456	4	3.4	1.17379	6.84	1.27662	0.76195	1.26709	0.731206	0.815204	0.463006	3.97065
01-01-05-01-01-01-17.mp4	AV	Speech	Angry	Normal	Kids	R1	A17	0.4	0.315846	3	3.1	1.1005	3.5	3.2	0.918937	2.52	3.73606	2.15956	2.0467	1.28831	1.04455	0.444592	3.47015
01-01-05-01-01-01-18.mp4	AV	Speech	Angry	Normal	Kids	R1	A18	1	0.789616	5	4.8	0.421637	4	3.4	1.57762	8.2	2.20142	1.86002	1.99282	1.46465	0.799089	0.730702	3.9039
01-01-05-01-01-01-19.mp4	AV	Speech	Angry	Normal	Kids	R1	A19	0.8	0.631693	4	3.4	0.843274	3	2.8	1.47573	4.96	1.72329	1.34069	1.72403	0.940065	1.23056	1.02692	3.77044
01-01-05-01-01-01-20.mp4	AV	Speech	Angry	Normal	Kids	R1	A20	0.7	0.552731	4	3.2	1.31656	3	3.4	1.07497	4.62	3.55184	1.54137	1.86809	1.55123	1.02104	0.848151	3.23658
01-01-05-01-01-01-21.mp4	AV	Speech	Angry	Normal	Kids	R1	A21	1	0.789616	3.5	3.6	0.966092	3.5	2.9	1.52388	6.5	2.45975	1.15401	1.2156	0.707855	0.570804	0.343357	4.13748
01-01-05-01-01-01-22.mp4	AV	Speech	Angry	Normal	Kids	R1	A22	0.7	0.552731	2.5	2.5	0.849837	2.5	2.7	1.49443	3.64	2.27756	1.34436	1.20217	0.688387	0.916595	0.704822	3.70371
01-01-05-01-01-01-23.mp4	AV	Speech	Angry	Normal	Kids	R1	A23	0.2	0.157923	3	3.2	1.13529	3.5	3.3	1.05935	1.3	2.2089	0.80976	1.34383	1.14959	0.874339	0.594269	3.30331
01-01-05-01-01-01-24.mp4	AV	Speech	Angry	Normal	Kids	R1	A24	1	0.789616	3.5	3.5	1.08012	3	2.8	1.47573	6.3	2.59196	1.89324	1.65946	0.655773	1.16003	0.738621	4.1041
01-01-05-01-01-02-01.mp4	AV	Speech	Angry	Normal	Kids	R2	A1	0.9	0.710654	3.5	3.6	0.699206	4	3.7	1.25167	6.57	2.41638	1.7995	1.49456	1.58125	0.525941	0.433582	3.93727
01-01-05-01-01-02-02.mp4	AV	Speech	Angry	Normal	Kids	R2	A2	0.9	0.710654	4	3.8	0.788811	3	3.4	0.843274	6.48	2.77801	2.04115	1.64679	1.7514	0.790578	0.518628	3.67033
01-01-05-01-01-02-03.mp4	AV	Speech	Angry	Normal	Kids	R2	A3	1	0.789616	4.5	4.4	0.699206	4	4	1.24722	8.4	2.60912	1.46117	1.24118	0.770098	1.19262	1.37672	4.07073
01-01-05-01-01-02-04.mp4	AV	Speech	Angry	Normal	Kids	R2	A4	0.8	0.631693	4.5	4.5	0.527046	4	3.9	0.875595	6.72	1.80214	0.826641	1.1365	0.639025	0.908115	0.921896	3.6036
01-01-05-01-01-02-05.mp4	AV	Speech	Angry	Normal	Kids	R2	A5	0.9	0.710654	4.5	4.4	0.699206	4.5	3.7	1.56702	7.29	1.94155	0.658767	1.91288	1.85732	0.647569	0.492386	3.80379
01-01-05-01-01-02-06.mp4	AV	Speech	Angry	Normal	Kids	R2	A6	0.8	0.631693	4	3.7	0.823273	4	3.6	1.17379	5.84	3.1249	2.16586	2.77876	1.5859	1.97077	1.19654	3.97063
01-01-05-01-01-02-07.mp4	AV	Speech	Angry	Normal	Kids	R2	A7	0.9	0.710654	4	4.3	0.483046	4.5	4.4	0.699206	7.83	1.66827	0.952773	1.39896	0.771423	0.919186	0.547391	3.97065
01-01-05-01-01-02-08.mp4	AV	Speech	Angry	Normal	Kids	R2	A8	0.5	0.394808	4	3.8	0.788811	4	3.8	0.788811	3.8	3.28035	1.48043	2.27945	1.90855	1.04648	0.787799	3.6036
01-01-05-01-01-02-09.mp4	AV	Speech	Angry	Normal	Kids	R2	A9	0.9	0.710654	4	4	1.1547	4	3.5	1.64992	6.75	1.35086	0.718	1.01045	0.584687	1.17255	1.04404	3.57025
01-01-05-01-01-02-10.mp4	AV	Speech	Angry	Normal	Kids	R2	A10	0.9	0.710654	4	4.2	0.632456	3.5	3.1	1.37032	6.57	1.53354	0.763519	2.17621	1.44839	1.16371	0.806081	4.004
01-01-05-01-01-02-11.mp4	AV	Speech	Angry	Normal	Kids	R2	A11	0.8	0.631693	3	3.1	0.567646	4	3.7	0.823273	5.44	2.1499	1.79061	1.86128	1.51267	0.777369	0.468689	3.47015
01-01-05-01-01-02-12.mp4	AV	Speech	Angry	Normal	Kids	R2	A12	0.7	0.552731	4	3.9	0.737865	3	3.3	0.674949	5.04	2.30924	1.6375	1.57212	0.725949	1.25414	0.891723	3.97063
01-01-05-01-01-02-13.mp4	AV	Speech	Angry	Normal	Kids	R2	A13	0.8	0.631693	4	3.5	1.2693	4	3.8	1.22927	5.84	2.4313	1.31322	1.49334	1.40499	0.583067	0.528546	3.53685
01-01-05-01-01-02-14.mp4	AV	Speech	Angry	Normal	Kids	R2	A14	0.9	0.710654	4	4	0.666667	4	3.7	1.25167	6.93	2.04876	1.02161	1.43765	0.887878	0.778312	0.537064	3.70371
01-01-05-01-01-02-15.mp4	AV	Speech	Angry	Normal	Kids	R2	A15	0.7	0.552731	3	3.5	1.17851	4.5	3.9	1.37032	5.18	1.8203	0.852158	1.92575	1.87536	0.831786	0.501551	3.6036
01-01-05-01-01-02-16.mp4	AV	Speech	Angry	Normal	Kids	R2	A16	0.9	0.710654	4	4.3	0.674949	5	4.7	0.483046	8.1	1.36917	0.684386	1.34474	1.09872	0.556718	0.391784	4.004
01-01-05-01-01-02-17.mp4	AV	Speech	Angry	Normal	Kids	R2	A17	0.7	0.552731	4	3.7	0.948683	4	4.2	0.788811	5.53	2.37951	0.961001	1.72492	1.05501	0.949071	0.473399	3.70371
01-01-05-01-01-02-18.mp4	AV	Speech	Angry	Normal	Kids	R2	A18	0.9	0.710654	4	3.9	1.28668	4	3.7	1.33749	6.84	2.50195	1.99499	1.54629	0.765266	0.847487	0.643909	4.17083
01-01-05-01-01-02-19.mp4	AV	Speech	Angry	Normal	Kids	R2	A19	0.9	0.710654	4	3.4	1.07497	4	3.6	1.17379	6.3	1.49797	0.831556	1.27381	0.770798	0.697895	0.524312	3.70371
01-01-05-01-01-02-20.mp4	AV	Speech	Angry	Normal	Kids	R2	A20	0.8	0.631693	3.5	3.6	0.699206	4	3.8	1.13529	5.92	2.84156	2.01039	1.36693	0.812773	0.889158	0.866924	3.73706
01-01-05-01-01-02-21.mp4	AV	Speech	Angry	Normal	Kids	R2	A21	0.8	0.631693	4	3.5	1.43372	3	3	1.41421	5.2	2.87625	1.60033	1.98067	1.6554	1.03725	0.788863	4.004
01-01-05-01-01-02-22.mp4	AV	Speech	Angry	Normal	Kids	R2	A22	0.5	0.394808	2.5	2.6	0.966092	3	2.9	0.994429	2.75	1.97312	1.48618	1.47463	0.555614	1.4914	0.993815	3.73706
01-01-05-01-01-02-23.mp4	AV	Speech	Angry	Normal	Kids	R2	A23	0.4	0.315846	3	3.1	0.994429	3	3.3	1.05935	2.56	2.80185	1.31568	1.22325	0.893145	0.772948	0.341711	3.30331
01-01-05-01-01-02-24.mp4	AV	Speech	Angry	Normal	Kids	R2	A24	0.7	0.552731	3.5	3.4	1.07497	3	2.9	1.1005	4.41	3.22138	1.8081	3.54754	1.81355	2.09089	1.29486	3.73706
01-01-05-01-02-01-01.mp4	AV	Speech	Angry	Normal	Dogs	R1	A1	0	0	2.5	2.8	1.39841	4	3.9	0.316228	0	2.43882	1.87861	1.63223	0.91083	1.03513	0.954767	3.5035
01-01-05-01-02-01-02.mp4	AV	Speech	Angry	Normal	Dogs	R1	A2	0.3	0.236885	4	3.4	1.3499	3	3.1	1.19722	1.95	3.03133	1.86691	1.69281	1.12664	0.912415	0.492018	3.77042
01-01-05-01-02-01-03.mp4	AV	Speech	Angry	Normal	Dogs	R1	A3	0.9	0.710654	4	3.7	1.25167	4.5	4	1.33333	6.93	2.12037	1.17803	1.54186	1.03254	0.864392	0.552262	3.80381
01-01-05-01-02-01-04.mp4	AV	Speech	Angry	Normal	Dogs	R1	A4	0.9	0.710654	4	4.3	0.674949	4	3.6	1.17379	7.11	1.65447	0.659511	0.937173	0.370852	0.645933	0.527796	3.47012
01-01-05-01-02-01-05.mp4	AV	Speech	Angry	Normal	Dogs	R1	A5	0.4	0.315846	3	3	1.49071	4.5	4	1.41421	2.8	1.88618	1.38712	1.88763	1.28883	1.38712	0.848032	4.07073
01-01-05-01-02-01-06.mp4	AV	Speech	Angry	Normal	Dogs	R1	A6	0.9	0.710654	4	4.4	0.516398	4	3.7	1.41814	7.29	1.30498	0.58246	0.945783	0.656785	0.617158	0.498372	4.20419
01-01-05-01-02-01-07.mp4	AV	Speech	Angry	Normal	Dogs	R1	A7	0.9	0.710654	4	3.8	1.0328	3	3.3	1.1595	6.39	2.08593	1.05091	1.64026	1.45241	0.952715	0.730966	4.004
01-01-05-01-02-01-08.mp4	AV	Speech	Angry	Normal	Dogs	R1	A8	0.4	0.315846	3	3.5	0.849837	4	3.8	0.788811	2.92	2.65694	1.47053	2.79102	1.72142	0.957192	0.992942	3.53688
01-01-05-01-02-01-09.mp4	AV	Speech	Angry	Normal	Dogs	R1	A9	1	0.789616	4	3.8	1.0328	4	3.5	1.2693	7.3	1.4546	0.801418	1.63049	1.26869	0.933823	0.644251	3.73706
01-01-05-01-02-01-10.mp4	AV	Speech	Angry	Normal	Dogs	R1	A10	1	0.789616	4	3.9	0.994429	4	3.9	0.994429	7.8	1.85912	0.979148	1.61799	1.10312	0.627987	0.473674	4.1041
01-01-05-01-02-01-11.mp4	AV	Speech	Angry	Normal	Dogs	R1	A11	0.7	0.552731	3	2.8	0.632456	3	3	0.816497	4.06	3.28894	1.80118	1.49792	0.838277	1.33418	0.736162	3.47012
01-01-05-01-02-01-12.mp4	AV	Speech	Angry	Normal	Dogs	R1	A12	0.6	0.473769	4	3.9	0.737865	4	4.2	0.788811	4.86	2.25092	1.81992	1.44067	1.15346	1.00125	0.76467	3.73708
01-01-05-01-02-01-13.mp4	AV	Speech	Angry	Normal	Dogs	R1	A13	0.8	0.631693	4	3.7	1.1595	4	3.7	1.25167	5.92	2.14907	1.20762	1.92851	1.41283	1.28837	1.3165	3.6036
01-01-05-01-02-01-14.mp4	AV	Speech	Angry	Normal	Dogs	R1	A14	0.9	0.710654	4	4.1	0.994429	4	3.9	0.994429	7.2	1.9004	0.687128	1.19476	0.994033	0.765511	0.518613	3.73706
01-01-05-01-02-01-15.mp4	AV	Speech	Angry	Normal	Dogs	R1	A15	0.9	0.710654	3.5	3.5	1.2693	3.5	3.6	1.17379	6.39	2.28674	1.04308	1.21081	0.612547	0.495404	0.398255	3.70371
01-01-05-01-02-01-16.mp4	AV	Speech	Angry	Normal	Dogs	R1	A16	0.5	0.394808	5	4.5	0.707107	5	4.7	0.483046	4.6	1.84203	0.942965	1.53825	1.18811	0.584086	0.63499	3.9039
01-01-05-01-02-01-17.mp4	AV	Speech	Angry	Normal	Dogs	R1	A17	0.5	0.394808	2	2.7	1.41814	3	3.4	0.843274	3.05	3.16175	2.07351	1.61347	1.33259	1.15122	0.702141	3.6036
01-01-05-01-02-01-18.mp4	AV	Speech	Angry	Normal	Dogs	R1	A18	0.9	0.710654	4	4.2	0.788811	3.5	3.5	1.08012	6.93	1.87047	1.38124	1.54973	0.855322	1.55106	1.31016	3.57023
01-01-05-01-02-01-19.mp4	AV	Speech	Angry	Normal	Dogs	R1	A19	0.2	0.157923	3.5	3.5	1.35401	4	4.1	0.316228	1.52	2.89337	1.23847	1.39802	0.533727	1.10078	0.921361	3.30331
01-01-05-01-02-01-20.mp4	AV	Speech	Angry	Normal	Dogs	R1	A20	0.9	0.710654	4	3.7	0.948683	4	3.9	1.19722	6.84	1.76237	1.2821	1.44361	0.749022	1.01605	1.21137	3.67033
01-01-05-01-02-01-21.mp4	AV	Speech	Angry	Normal	Dogs	R1	A21	0.7	0.552731	3.5	3.3	0.823273	2.5	2.2	1.13529	3.85	2.14259	0.942958	2.32074	1.01961	1.3955	0.945238	4.07073
01-01-05-01-02-01-22.mp4	AV	Speech	Angry	Normal	Dogs	R1	A22	0.6	0.473769	3.5	3.3	1.05935	3	3.1	1.28668	3.84	3.65815	2.20682	1.69296	0.822425	1.05768	0.699912	3.87052
01-01-05-01-02-01-23.mp4	AV	Speech	Angry	Normal	Dogs	R1	A23	0.3	0.236885	3	3.2	0.918937	4	3.9	0.737865	2.13	2.49879	0.703037	1.89074	1.20974	1.20525	1.28001	3.26994
01-01-05-01-02-01-24.mp4	AV	Speech	Angry	Normal	Dogs	R1	A24	0.7	0.552731	3	2.9	0.994429	4	3.6	1.26491	4.55	3.52128	2.14674	1.84489	1.01699	1.50384	1.14014	3.67033
01-01-05-01-02-02-01.mp4	AV	Speech	Angry	Normal	Dogs	R2	A1	0.9	0.710654	3	2.8	1.0328	2.5	2.6	1.17379	4.86	2.58531	1.5739	2.11271	1.14561	0.978246	0.369245	3.73706
01-01-05-01-02-02-02.mp4	AV	Speech	Angry	Normal	Dogs	R2	A2	0.4	0.315846	4	3.5	0.971825	3.5	3.2	1.0328	2.68	3.81022	2.60974	2.90355	1.77911	1.36866	1.29943	3.80379
01-01-05-01-02-02-03.mp4	AV	Speech	Angry	Normal	Dogs	R2	A3	0.9	0.710654	4	3.9	0.567646	4	3.6	1.07497	6.75	2.15163	1.44228	1.49282	1.178	0.934295	0.631481	3.83717
01-01-05-01-02-02-04.mp4	AV	Speech	Angry	Normal	Dogs	R2	A4	0.6	0.473769	4	3.7	0.948683	4	3.7	0.948683	4.44	2.83362	2.09842	2.62801	2.46355	1.47665	1.52179	3.73706
01-01-05-01-02-02-05.mp4	AV	Speech	Angry	Normal	Dogs	R2	A5	1	0.789616	4.5	4.3	0.823273	3.5	3.7	1.33749	8	1.60613	0.747045	1.47288	1.22244	0.699632	0.585645	4.4044
01-01-05-01-02-02-06.mp4	AV	Speech	Angry	Normal	Dogs	R2	A6	0.8	0.631693	3.5	3.4	1.42984	4	3.9	0.737865	5.84	2.72498	1.97078	1.34911	0.867601	0.574017	0.469706	3.9039
01-01-05-01-02-02-07.mp4	AV	Speech	Angry	Normal	Dogs	R2	A7	1	0.789616	4	4.2	0.632456	4	4.3	0.674949	8.5	1.78827	0.567475	1.80563	1.21008	1.46333	0.920849	4.004
01-01-05-01-02-02-08.mp4	AV	Speech	Angry	Normal	Dogs	R2	A8	0.6	0.473769	3.5	3.4	1.17379	4	4	1.05409	4.44	2.29358	1.42209	2.04322	0.534076	1.16559	1.0357	3.57023
01-01-05-01-02-02-09.mp4	AV	Speech	Angry	Normal	Dogs	R2	A9	0.8	0.631693	4.5	4.3	0.823273	4	4	0.942809	6.64	2.20306	1.47654	1.74045	1.11012	1.03642	0.576075	3.53688
01-01-05-01-02-02-10.mp4	AV	Speech	Angry	Normal	Dogs	R2	A10	0.8	0.631693	4	4.2	0.788811	4.5	4.1	1.19722	6.64	3.19816	2.46441	2.85617	2.07272	1.31641	0.727659	4.13748
01-01-05-01-02-02-11.mp4	AV	Speech	Angry	Normal	Dogs	R2	A11	1	0.789616	3.5	3.4	0.966092	4	3.6	1.17379	7	1.82412	0.963303	2.1767	1.40992	1.16016	0.971373	3.73708
01-01-05-01-02-02-12.mp4	AV	Speech	Angry	Normal	Dogs	R2	A12	0.9	0.710654	3	3	0.942809	4.5	4	1.24722	6.3	1.86299	1.01524	0.991668	0.533713	0.716025	0.32598	4.13746
01-01-05-01-02-02-13.mp4	AV	Speech	Angry	Normal	Dogs	R2	A13	0.9	0.710654	4	3.9	0.737865	3.5	3.6	0.966092	6.75	2.21526	0.967237	2.18248	1.8282	0.800659	0.517519	3.37002
01-01-05-01-02-02-14.mp4	AV	Speech	Angry	Normal	Dogs	R2	A14	1	0.789616	4	4.2	0.788811	4	3.7	1.49443	7.9	2.32962	1.73872	1.65144	0.918385	0.826104	0.416442	3.90392
01-01-05-01-02-02-15.mp4	AV	Speech	Angry	Normal	Dogs	R2	A15	0.8	0.631693	3	3.1	0.737865	3	3.1	1.28668	4.96	3.15531	1.94223	1.5199	0.833075	1.16262	0.898441	3.53688
01-01-05-01-02-02-16.mp4	AV	Speech	Angry	Normal	Dogs	R2	A16	1	0.789616	4.5	4.4	0.699206	5	4.4	0.966092	8.8	1.47533	0.498854	1.82338	1.5917	0.80103	0.751671	3.9039
01-01-05-01-02-02-17.mp4	AV	Speech	Angry	Normal	Dogs	R2	A17	0.9	0.710654	2	2.4	1.07497	3	3.4	0.843274	5.22	1.58436	1.25067	1.41052	0.650854	1.36397	1.07938	3.53688
01-01-05-01-02-02-18.mp4	AV	Speech	Angry	Normal	Dogs	R2	A18	1	0.789616	4	4.2	0.788811	4.5	4	1.1547	8.2	2.04821	0.644529	2.02243	1.4902	1.14681	0.867436	3.63698
01-01-05-01-02-02-19.mp4	AV	Speech	Angry	Normal	Dogs	R2	A19	0.7	0.552731	4	3.7	0.674949	4	4.2	0.632456	5.53	2.18973	1.23903	1.7798	1.42543	0.922239	1.28418	3.57023
01-01-05-01-02-02-20.mp4	AV	Speech	Angry	Normal	Dogs	R2	A20	0.6	0.473769	3	3.1	0.875595	3.5	3.5	1.17851	3.96	2.73145	2.44934	1.50778	0.822738	0.926859	0.549774	3.80379
01-01-05-01-02-02-21.mp4	AV	Speech	Angry	Normal	Dogs	R2	A21	0.4	0.315846	4	4	0.816497	4	3.7	1.56702	3.08	2.50443	1.77131	2.2548	1.32363	0.778655	0.434886	3.93727
01-01-05-01-02-02-22.mp4	AV	Speech	Angry	Normal	Dogs	R2	A22	0.6	0.473769	2.5	2.7	1.05935	3	3	0.942809	3.42	3.30487	2.27642	1.42162	0.72455	0.920696	0.900743	4.03735
01-01-05-01-02-02-23.mp4	AV	Speech	Angry	Normal	Dogs	R2	A23	0.5	0.394808	4	3.8	0.788811	3	2.8	1.13529	3.3	2.89395	2.77185	1.53347	0.692012	1.34147	1.27274	3.33667
01-01-05-01-02-02-24.mp4	AV	Speech	Angry	Normal	Dogs	R2	A24	0.8	0.631693	3.5	3.3	1.33749	3	3	1.33333	5.04	2.71616	1.21906	1.87704	1.08428	1.02665	0.642225	4.20419
01-01-05-02-01-01-01.mp4	AV	Speech	Angry	Strong	Kids	R1	A1	1	0.789616	5	5	0	4	3.5	1.2693	8.5	1.80148	0.751627	1.29058	1.40862	0.818703	0.66955	4.1041
01-01-05-02-01-01-02.mp4	AV	Speech	Angry	Strong	Kids	R1	A2	1	0.789616	4	4	0.471405	4	4	0.816497	8	1.73307	0.717096	1.56239	1.06565	1.23856	0.945371	3.90392
01-01-05-02-01-01-03.mp4	AV	Speech	Angry	Strong	Kids	R1	A3	0.9	0.710654	5	4.8	0.421637	5	4.3	1.05935	8.19	1.96441	1.14159	1.80495	0.778594	1.05706	1.02656	4.4044
01-01-05-02-01-01-04.mp4	AV	Speech	Angry	Strong	Kids	R1	A4	1	0.789616	5	4.4	0.843274	4.5	4	1.41421	8.4	2.14012	1.04717	2.07489	1.62043	0.782631	0.644498	3.77044
01-01-05-02-01-01-05.mp4	AV	Speech	Angry	Strong	Kids	R1	A5	0.8	0.631693	5	4.4	1.3499	5	4.1	1.52388	6.8	1.91517	0.851706	1.32476	1.14447	0.901204	0.669763	3.4034
01-01-05-02-01-01-06.mp4	AV	Speech	Angry	Strong	Kids	R1	A6	1	0.789616	5	4.8	0.421637	4.5	4.1	1.28668	8.9	1.96527	1.2138	0.971419	0.389081	0.777787	0.612107	4.1041
01-01-05-02-01-01-07.mp4	AV	Speech	Angry	Strong	Kids	R1	A7	1	0.789616	5	4.6	0.516398	5	4.2	1.22927	8.8	1.78954	1.27163	0.847999	0.400201	0.793238	0.51515	3.6036
01-01-05-02-01-01-08.mp4	AV	Speech	Angry	Strong	Kids	R1	A8	0.6	0.473769	4.5	4.4	0.699206	5	4.1	1.28668	5.1	2.25411	1.87508	1.62183	1.25732	0.687559	0.58468	3.97063
01-01-05-02-01-01-09.mp4	AV	Speech	Angry	Strong	Kids	R1	A9	0.9	0.710654	5	4.9	0.316228	5	4.5	1.2693	8.46	1.93291	0.788926	1.32645	0.764779	0.50939	0.396683	3.80381
01-01-05-02-01-01-10.mp4	AV	Speech	Angry	Strong	Kids	R1	A10	0.8	0.631693	5	4.4	0.843274	4	3.7	0.823273	6.48	1.8569	1.14917	2.54983	1.63986	1.07372	0.764507	4.17083
01-01-05-02-01-01-11.mp4	AV	Speech	Angry	Strong	Kids	R1	A11	1	0.789616	4	3.9	0.994429	4.5	4.1	1.19722	8	1.86062	0.688586	1.83127	1.16526	1.26538	1.1623	3.53688
01-01-05-02-01-01-12.mp4	AV	Speech	Angry	Strong	Kids	R1	A12	1	0.789616	5	4.6	0.516398	4	3.8	1.13529	8.4	1.99467	0.99593	1.82222	1.39543	1.85621	1.10028	3.63696
01-01-05-02-01-01-13.mp4	AV	Speech	Angry	Strong	Kids	R1	A13	1	0.789616	5	4.6	0.843274	5	4.8	0.421637	9.4	1.36066	0.480895	1.50282	1.20057	0.577561	0.475583	3.67033
01-01-05-02-01-01-14.mp4	AV	Speech	Angry	Strong	Kids	R1	A14	1	0.789616	5	4.7	0.674949	3.5	3.3	1.41814	8	2.0249	0.881261	1.89684	1.91268	0.71682	0.424167	4.27094
01-01-05-02-01-01-15.mp4	AV	Speech	Angry	Strong	Kids	R1	A15	1	0.789616	4	4.1	0.567646	4	3.8	1.31656	7.9	1.71931	0.588693	1.8549	0.999394	0.818399	0.585104	3.53688
01-01-05-02-01-01-16.mp4	AV	Speech	Angry	Strong	Kids	R1	A16	0.8	0.631693	4	4.2	0.788811	4	4.2	0.632456	6.72	1.57875	1.37182	1.29488	0.923281	1.37062	1.44568	3.97065
01-01-05-02-01-01-17.mp4	AV	Speech	Angry	Strong	Kids	R1	A17	1	0.789616	5	4.4	0.843274	5	4.8	0.421637	9.2	2.84055	2.4816	1.56317	0.847756	0.713579	0.602676	3.5035
01-01-05-02-01-01-18.mp4	AV	Speech	Angry	Strong	Kids	R1	A18	0.9	0.710654	5	5	0	4.5	4.3	0.948683	8.37	2.40636	1.22087	1.90182	1.3544	0.926139	0.71873	3.70371
01-01-05-02-01-01-19.mp4	AV	Speech	Angry	Strong	Kids	R1	A19	1	0.789616	5	4.5	0.707107	4.5	4.1	1.1005	8.6	2.31846	1.05178	2.43685	1.46287	0.922411	0.579061	3.97065
01-01-05-02-01-01-20.mp4	AV	Speech	Angry	Strong	Kids	R1	A20	1	0.789616	5	4.9	0.316228	5	4	1.49071	8.9	2.82376	1.60725	2.44137	1.70967	1.4881	1.33092	4.13748
01-01-05-02-01-01-21.mp4	AV	Speech	Angry	Strong	Kids	R1	A21	0.9	0.710654	4	3.5	0.707107	2	2.1	1.1005	5.04	1.9008	1.23716	1.73867	1.03841	0.89506	0.411583	4.37104
01-01-05-02-01-01-22.mp4	AV	Speech	Angry	Strong	Kids	R1	A22	0.9	0.710654	5	4.1	1.19722	3	3.1	1.66333	6.48	2.20586	1.60715	2.01506	1.74064	1.16306	1.2076	3.87054
01-01-05-02-01-01-23.mp4	AV	Speech	Angry	Strong	Kids	R1	A23	1	0.789616	4	3.7	1.1595	2	2	0.942809	5.7	1.68631	0.368255	1.53882	0.798477	0.90165	0.323821	3.4034
01-01-05-02-01-01-24.mp4	AV	Speech	Angry	Strong	Kids	R1	A24	0.9	0.710654	4.5	4.3	0.823273	4	3.9	0.994429	7.38	2.15655	1.09122	1.33648	0.93824	0.658653	0.46513	4.37104
01-01-05-02-01-02-01.mp4	AV	Speech	Angry	Strong	Kids	R2	A1	0.9	0.710654	5	4.4	0.966092	3.5	3.6	1.42984	7.2	1.58277	0.636638	1.69779	1.15209	1.30724	1.56128	4.37104
01-01-05-02-01-02-02.mp4	AV	Speech	Angry	Strong	Kids	R2	A2	1	0.789616	4	4.3	0.674949	4	4	0.816497	8.3	2.39235	1.40711	2.28674	1.32565	1.01403	0.919737	4.004
01-01-05-02-01-02-03.mp4	AV	Speech	Angry	Strong	Kids	R2	A3	0.9	0.710654	5	4.9	0.316228	4.5	4	1.33333	8.01	1.29412	0.576638	1.05545	0.550561	1.20618	1.268	4.40442
01-01-05-02-01-02-04.mp4	AV	Speech	Angry	Strong	Kids	R2	A4	0.8	0.631693	4.5	4.4	0.699206	5	4.4	0.843274	7.04	1.79853	1.61598	1.49033	0.897579	0.699567	0.682694	3.87052
01-01-05-02-01-02-05.mp4	AV	Speech	Angry	Strong	Kids	R2	A5	1	0.789616	5	4.6	0.699206	4.5	3.8	1.47573	8.4	2.41595	1.70844	1.38426	0.908635	1.02243	1.15088	3.57023
01-01-05-02-01-02-06.mp4	AV	Speech	Angry	Strong	Kids	R2	A6	1	0.789616	5	4.8	0.421637	5	4.9	0.316228	9.7	1.93529	0.644069	1.60899	0.986501	1.217	1.41838	4.20419
01-01-05-02-01-02-07.mp4	AV	Speech	Angry	Strong	Kids	R2	A7	1	0.789616	5	4.6	0.699206	5	4.7	0.483046	9.3	1.5339	0.762858	1.0733	0.949588	0.64553	0.594024	4.004
01-01-05-02-01-02-08.mp4	AV	Speech	Angry	Strong	Kids	R2	A8	0.9	0.710654	5	4.7	0.674949	5	4.7	0.483046	8.46	2.11983	1.06349	1.25956	0.690573	0.696876	0.460303	3.77044
01-01-05-02-01-02-09.mp4	AV	Speech	Angry	Strong	Kids	R2	A9	1	0.789616	5	4.9	0.316228	5	4.5	1.2693	9.4	2.61972	1.4708	2.05664	1.62206	1.01949	0.890073	3.77044
01-01-05-02-01-02-10.mp4	AV	Speech	Angry	Strong	Kids	R2	A10	0.9	0.710654	5	4.3	1.05935	4	4	1.05409	7.47	2.01872	1.78912	0.967715	0.782571	0.836142	0.826838	4.47112
01-01-05-02-01-02-11.mp4	AV	Speech	Angry	Strong	Kids	R2	A11	0.9	0.710654	4	4.4	0.516398	4	3.9	1.37032	7.47	1.66526	1.06827	1.61847	0.96955	0.82685	0.491085	3.97063
01-01-05-02-01-02-12.mp4	AV	Speech	Angry	Strong	Kids	R2	A12	0.9	0.710654	5	4.8	0.421637	4	4	1.24722	7.92	2.17846	1.86659	1.39968	0.754698	0.754905	0.546001	3.67033
01-01-05-02-01-02-13.mp4	AV	Speech	Angry	Strong	Kids	R2	A13	1	0.789616	5	4.8	0.632456	5	4.7	0.483046	9.5	1.75864	0.992526	2.51305	1.89135	1.09914	0.59691	4.27094
01-01-05-02-01-02-14.mp4	AV	Speech	Angry	Strong	Kids	R2	A14	1	0.789616	5	4.7	0.483046	4	3.7	1.49443	8.4	2.16802	1.00286	1.31234	1.14178	0.877718	0.987901	4.37102
01-01-05-02-01-02-15.mp4	AV	Speech	Angry	Strong	Kids	R2	A15	1	0.789616	4	4	0.816497	4	3.8	1.0328	7.8	2.33994	1.72497	1.36861	0.980428	0.573018	0.375005	3.73708
01-01-05-02-01-02-16.mp4	AV	Speech	Angry	Strong	Kids	R2	A16	1	0.789616	5	4.8	0.421637	5	4.8	0.421637	9.6	2.20086	1.69851	1.77165	1.9264	0.660191	0.737044	3.73706
01-01-05-02-01-02-17.mp4	AV	Speech	Angry	Strong	Kids	R2	A17	1	0.789616	5	4.7	0.483046	4	4.4	0.516398	9.1	2.07011	0.867063	1.82935	0.760146	1.10953	0.766978	3.73706
01-01-05-02-01-02-18.mp4	AV	Speech	Angry	Strong	Kids	R2	A18	0.9	0.710654	5	4.8	0.421637	3.5	3.2	1.68655	7.2	2.04946	0.943837	1.4109	0.932735	0.575671	0.374128	3.77044
01-01-05-02-01-02-19.mp4	AV	Speech	Angry	Strong	Kids	R2	A19	1	0.789616	5	4.8	0.421637	5	4.3	1.05935	9.1	2.02098	0.901665	1.43694	1.71732	0.538188	0.434025	4.80479
01-01-05-02-01-02-20.mp4	AV	Speech	Angry	Strong	Kids	R2	A20	1	0.789616	5	4.9	0.316228	4	3.9	1.37032	8.8	1.92527	0.560783	2.58158	1.10505	1.36385	0.739632	4.07073
01-01-05-02-01-02-21.mp4	AV	Speech	Angry	Strong	Kids	R2	A21	0.6	0.473769	4	3.3	1.63639	1	1.9	1.28668	3.12	3.95539	1.28895	2.7074	1.38933	1.05225	0.513992	4.47112
01-01-05-02-01-02-22.mp4	AV	Speech	Angry	Strong	Kids	R2	A22	0.8	0.631693	4	3.6	1.17379	2.5	2.8	1.39841	5.12	2.0457	1.54717	0.99783	0.76079	0.752497	0.88411	3.9039
01-01-05-02-01-02-23.mp4	AV	Speech	Angry	Strong	Kids	R2	A23	0.9	0.710654	4	3.9	0.567646	3	2.8	1.22927	6.03	2.4278	1.9538	1.20229	0.783244	0.923753	1.08378	3.33667
01-01-05-02-01-02-24.mp4	AV	Speech	Angry	Strong	Kids	R2	A24	0.8	0.631693	4	4	0.666667	3	3.2	1.13529	5.76	2.16802	1.5005	1.60133	1.02881	1.10795	1.07846	4.37104
01-01-05-02-02-01-01.mp4	AV	Speech	Angry	Strong	Dogs	R1	A1	1	0.789616	5	4.7	0.483046	5	4.8	0.421637	9.5	1.7368	1.06133	1.53373	1.38022	0.771487	0.669794	4.13746
01-01-05-02-02-01-02.mp4	AV	Speech	Angry	Strong	Dogs	R1	A2	0.9	0.710654	5	4.7	0.483046	4	4.2	0.918937	8.01	2.99379	1.71854	1.95411	0.962275	1.1948	0.906408	4.004
01-01-05-02-02-01-03.mp4	AV	Speech	Angry	Strong	Dogs	R1	A3	1	0.789616	5	5	0	5	4.4	0.843274	9.4	2.27285	1.03509	1.65253	1.14855	1.1341	0.558116	4.23756
01-01-05-02-02-01-04.mp4	AV	Speech	Angry	Strong	Dogs	R1	A4	0.8	0.631693	5	4.6	0.699206	4	4	0.942809	6.88	2.10264	1.85524	1.27344	0.72516	1.57324	1.13268	3.70369
01-01-05-02-02-01-05.mp4	AV	Speech	Angry	Strong	Dogs	R1	A5	0.9	0.710654	5	5	0	5	4.3	1.25167	8.37	2.13757	1.28312	1.03505	0.677184	0.868197	0.754424	3.63696
01-01-05-02-02-01-06.mp4	AV	Speech	Angry	Strong	Dogs	R1	A6	0.9	0.710654	5	5	0	4.5	4.4	0.699206	8.46	1.81489	0.69031	1.22259	0.690252	0.65012	0.574516	4.43777
01-01-05-02-02-01-07.mp4	AV	Speech	Angry	Strong	Dogs	R1	A7	1	0.789616	5	4.9	0.316228	5	4.7	0.674949	9.6	1.71964	1.17329	0.874808	0.624561	0.690673	0.690604	3.83717
01-01-05-02-02-01-08.mp4	AV	Speech	Angry	Strong	Dogs	R1	A8	1	0.789616	4	4.2	0.632456	4	4	0.666667	8.2	2.37975	2.05559	1.26779	0.832318	0.965264	0.717717	3.6036
01-01-05-02-02-01-09.mp4	AV	Speech	Angry	Strong	Dogs	R1	A9	0.9	0.710654	5	4.8	0.632456	4.5	4.3	0.948683	8.19	2.3287	1.48289	0.664805	0.385946	0.822064	0.997963	4.37104
01-01-05-02-02-01-10.mp4	AV	Speech	Angry	Strong	Dogs	R1	A10	0.8	0.631693	5	4.6	0.516398	5	4.5	0.971825	7.28	1.85876	1.00535	1.59674	0.944383	0.89075	0.790644	3.87052
01-01-05-02-02-01-11.mp4	AV	Speech	Angry	Strong	Dogs	R1	A11	1	0.789616	4.5	4.4	0.699206	4.5	4.4	0.699206	8.8	2.27466	1.03292	1.34488	0.804667	1.42926	1.22877	3.93727
01-01-05-02-02-01-12.mp4	AV	Speech	Angry	Strong	Dogs	R1	A12	1	0.789616	5	4.9	0.316228	4	3.6	1.57762	8.5	1.98521	1.16528	1.5625	0.837696	1.10604	0.64826	3.80381
01-01-05-02-02-01-13.mp4	AV	Speech	Angry	Strong	Dogs	R1	A13	1	0.789616	5	4.7	0.674949	5	4.6	0.699206	9.3	1.71958	0.949184	1.25802	0.911486	1.00299	1.05113	3.57023
01-01-05-02-02-01-14.mp4	AV	Speech	Angry	Strong	Dogs	R1	A14	1	0.789616	4.5	4.3	0.948683	4	3.7	1.33749	8	2.0467	1.16078	1.07702	0.806013	0.538856	0.391935	4.17083
01-01-05-02-02-01-15.mp4	AV	Speech	Angry	Strong	Dogs	R1	A15	1	0.789616	4	3.3	1.25167	4	4.1	0.567646	7.4	2.05116	1.30968	1.57912	1.2865	0.648247	0.420334	3.47015
01-01-05-02-02-01-16.mp4	AV	Speech	Angry	Strong	Dogs	R1	A16	1	0.789616	4.5	4.4	0.699206	5	4.5	0.707107	8.9	1.82646	1.25394	2.26448	1.52476	0.793291	0.642416	3.80379
01-01-05-02-02-01-17.mp4	AV	Speech	Angry	Strong	Dogs	R1	A17	0.9	0.710654	4	3.8	1.22927	3.5	3.4	1.07497	6.48	1.49309	0.849867	1.35627	0.931678	0.909167	0.59597	3.63698
01-01-05-02-02-01-18.mp4	AV	Speech	Angry	Strong	Dogs	R1	A18	0.9	0.710654	5	4.5	0.971825	4	3.8	1.22927	7.47	2.66624	1.42698	1.49849	0.894364	1.19511	0.99184	3.83717
01-01-05-02-02-01-19.mp4	AV	Speech	Angry	Strong	Dogs	R1	A19	0.8	0.631693	5	4.9	0.316228	5	4.3	1.05935	7.36	2.23604	1.19418	1.75214	0.855859	0.986153	0.911091	4.33767
01-01-05-02-02-01-20.mp4	AV	Speech	Angry	Strong	Dogs	R1	A20	1	0.789616	5	5	0	4.5	4.3	0.948683	9.3	1.84013	1.00997	1.52751	0.989987	0.955052	0.477301	4.40442
01-01-05-02-02-01-21.mp4	AV	Speech	Angry	Strong	Dogs	R1	A21	0.9	0.710654	4	4.2	0.421637	3	3.2	1.54919	6.66	2.16803	1.73103	1.75405	0.883064	1.17527	0.849695	4.10408
01-01-05-02-02-01-22.mp4	AV	Speech	Angry	Strong	Dogs	R1	A22	1	0.789616	4	4.3	0.483046	2.5	2.8	1.39841	7.1	2.7008	1.52865	1.94187	1.363	1.47881	1.4862	4.23758
01-01-05-02-02-01-23.mp4	AV	Speech	Angry	Strong	Dogs	R1	A23	1	0.789616	4.5	4.2	1.0328	3	2.9	1.28668	7.1	1.87297	0.672194	1.5378	1.11534	1.07533	0.641271	3.23656
01-01-05-02-02-01-24.mp4	AV	Speech	Angry	Strong	Dogs	R1	A24	0.9	0.710654	4	3.6	1.07497	3	3.5	0.971825	6.39	2.66935	2.30689	1.22601	0.913947	1.11833	1.08891	4.17083
01-01-05-02-02-02-01.mp4	AV	Speech	Angry	Strong	Dogs	R2	A1	1	0.789616	5	4.9	0.316228	4.5	4.2	1.0328	9.1	2.33649	2.05568	1.46187	1.15939	1.34511	1.45936	4.43777
01-01-05-02-02-02-02.mp4	AV	Speech	Angry	Strong	Dogs	R2	A2	1	0.789616	4.5	4.2	0.918937	3	3.2	1.22927	7.4	1.7633	1.26411	1.11281	0.662844	0.676841	0.577247	4.004
01-01-05-02-02-02-03.mp4	AV	Speech	Angry	Strong	Dogs	R2	A3	1	0.789616	5	4.9	0.316228	5	4.7	0.674949	9.6	1.62879	0.635124	1.64826	1.91207	0.555314	0.597671	4.5045
01-01-05-02-02-02-04.mp4	AV	Speech	Angry	Strong	Dogs	R2	A4	0.7	0.552731	4.5	4.2	1.0328	4	3.8	1.31656	5.6	2.31726	1.40476	1.09392	1.29585	0.69593	0.750224	3.83717
01-01-05-02-02-02-05.mp4	AV	Speech	Angry	Strong	Dogs	R2	A5	0.9	0.710654	5	5	0	4.5	3.9	1.44914	8.01	1.87511	0.817543	0.910085	0.642549	0.738914	0.451912	3.63698
01-01-05-02-02-02-06.mp4	AV	Speech	Angry	Strong	Dogs	R2	A6	1	0.789616	5	4.9	0.316228	5	4.5	0.707107	9.4	1.9602	1.00005	1.12476	0.838004	0.818881	0.919002	4.47112
01-01-05-02-02-02-07.mp4	AV	Speech	Angry	Strong	Dogs	R2	A7	1	0.789616	5	4.8	0.421637	4.5	4.3	0.948683	9.1	2.05999	1.49415	1.03099	0.907801	1.21064	1.29659	4.33767
01-01-05-02-02-02-08.mp4	AV	Speech	Angry	Strong	Dogs	R2	A8	0.9	0.710654	4	4.2	0.788811	4	4.3	0.674949	7.65	2.34891	0.981661	1.72094	1.96112	0.903349	0.712643	3.63696
01-01-05-02-02-02-09.mp4	AV	Speech	Angry	Strong	Dogs	R2	A9	1	0.789616	5	4.9	0.316228	5	4.7	0.483046	9.6	2.26976	1.08956	1.93724	1.74402	1.2276	0.971468	3.97065
01-01-05-02-02-02-10.mp4	AV	Speech	Angry	Strong	Dogs	R2	A10	0.8	0.631693	4.5	4.3	0.948683	4	3.6	1.50555	6.32	2.82373	1.88396	1.82928	1.58717	1.02184	0.908383	4.13746
01-01-05-02-02-02-11.mp4	AV	Speech	Angry	Strong	Dogs	R2	A11	0.9	0.710654	5	4.6	0.699206	4	3.9	1.19722	7.65	1.8675	1.38959	1.58683	1.22886	1.03258	0.731964	3.77044
01-01-05-02-02-02-12.mp4	AV	Speech	Angry	Strong	Dogs	R2	A12	1	0.789616	5	4.8	0.421637	4	4.2	0.788811	9	1.73165	0.710547	1.89844	1.10882	1.37781	1.24216	3.83717
01-01-05-02-02-02-13.mp4	AV	Speech	Angry	Strong	Dogs	R2	A13	1	0.789616	5	4.7	0.483046	5	4.6	0.966092	9.3	1.86612	0.851345	1.32831	0.984167	0.879727	0.797799	4.17083
01-01-05-02-02-02-14.mp4	AV	Speech	Angry	Strong	Dogs	R2	A14	1	0.789616	5	4.6	0.699206	4	3.7	1.25167	8.3	1.99072	1.1833	1.4058	1.04753	0.869943	0.501791	4.40442
01-01-05-02-02-02-15.mp4	AV	Speech	Angry	Strong	Dogs	R2	A15	0.8	0.631693	4	4.2	0.918937	4	3.8	0.918937	6.4	2.64982	1.71381	2.80982	2.13247	1.29693	0.860379	3.6036
01-01-05-02-02-02-16.mp4	AV	Speech	Angry	Strong	Dogs	R2	A16	0.9	0.710654	5	4.6	0.516398	4.5	3.9	1.44914	7.65	1.55191	0.473576	0.937228	0.629417	0.646184	0.504668	4.07075
01-01-05-02-02-02-17.mp4	AV	Speech	Angry	Strong	Dogs	R2	A17	1	0.789616	4.5	4.3	0.823273	4	3.7	1.1595	8	1.87755	0.510688	3.09189	1.97804	1.10843	1.19249	3.80381
01-01-05-02-02-02-18.mp4	AV	Speech	Angry	Strong	Dogs	R2	A18	0.9	0.710654	5	5	0	3	2.7	1.63639	6.93	1.72823	0.450884	1.98026	1.03525	1.56427	1.23578	4.23756
01-01-05-02-02-02-19.mp4	AV	Speech	Angry	Strong	Dogs	R2	A19	1	0.789616	5	4.7	0.674949	4.5	3.9	1.28668	8.6	3.03942	1.86161	1.3321	0.909311	0.643058	0.610298	4.1041
01-01-05-02-02-02-20.mp4	AV	Speech	Angry	Strong	Dogs	R2	A20	0.9	0.710654	5	4.8	0.421637	4	4.1	0.994429	8.01	2.51021	1.71334	1.30875	0.535141	0.728452	0.396463	3.53685
01-01-05-02-02-02-21.mp4	AV	Speech	Angry	Strong	Dogs	R2	A21	1	0.789616	4.5	3.9	1.44914	2	1.9	1.19722	5.8	2.89076	2.03217	1.75912	0.840638	0.713629	0.440238	4.23756
01-01-05-02-02-02-22.mp4	AV	Speech	Angry	Strong	Dogs	R2	A22	1	0.789616	4.5	4.5	0.527046	4	3.9	0.875595	8.4	2.12781	0.901678	1.84081	1.32925	0.537154	0.592033	4.20421
01-01-05-02-02-02-23.mp4	AV	Speech	Angry	Strong	Dogs	R2	A23	1	0.789616	5	4.7	0.483046	4	3.9	1.28668	8.6	1.54501	0.780978	1.87134	1.13917	1.14344	1.39185	3.30329
01-01-05-02-02-02-24.mp4	AV	Speech	Angry	Strong	Dogs	R2	A24	1	0.789616	4	4.3	0.674949	4	3.7	1.25167	8	2.53228	0.961811	1.00425	0.720966	0.817617	0.814044	5.1051
01-01-06-01-01-01-01.mp4	AV	Speech	Fearful	Normal	Kids	R1	A1	0.8	0.636282	4	3.5	1.2693	4	3.9	1.1005	5.92	2.81031	0.920662	1.66025	1.07248	0.922195	0.571986	3.67033
01-01-06-01-01-01-02.mp4	AV	Speech	Fearful	Normal	Kids	R1	A2	0.9	0.715817	3.5	3.4	1.17379	3	3.1	1.1005	5.85	2.30157	0.843865	2.12802	1.40755	1.02421	0.839331	3.63698
01-01-06-01-01-01-03.mp4	AV	Speech	Fearful	Normal	Kids	R1	A3	0.5	0.397676	4	4.1	0.875595	3.5	3.6	1.3499	3.85	3.3163	1.75709	1.98099	0.953876	1.57317	1.2427	3.73708
01-01-06-01-01-01-04.mp4	AV	Speech	Fearful	Normal	Kids	R1	A4	0.7	0.556747	4	3.9	0.994429	3.5	3.1	1.19722	4.9	2.07209	0.674501	1.70729	0.631802	0.596867	0.441322	3.30329
01-01-06-01-01-01-05.mp4	AV	Speech	Fearful	Normal	Kids	R1	A5	0.9	0.715817	4	4	0.816497	3.5	3.7	0.823273	6.93	3.10382	2.11334	2.54635	1.4645	1.33579	1.13898	3.13648
01-01-06-01-01-01-06.mp4	AV	Speech	Fearful	Normal	Kids	R1	A6	0.9	0.715817	4	4	1.05409	3.5	3.4	1.17379	6.66	1.87209	0.967234	1.53639	0.601108	0.545067	0.419727	3.63696
01-01-06-01-01-01-07.mp4	AV	Speech	Fearful	Normal	Kids	R1	A7	1	0.795352	4	3.9	0.875595	4	4	0.816497	7.9	2.0406	0.706285	2.39325	2.07825	1.27018	1.16169	3.43677
01-01-06-01-01-01-08.mp4	AV	Speech	Fearful	Normal	Kids	R1	A8	0.9	0.715817	4	3.8	0.788811	4	3.4	1.07497	6.48	3.04776	1.36424	1.50133	1.10079	0.965018	0.601909	3.97065
01-01-06-01-01-01-09.mp4	AV	Speech	Fearful	Normal	Kids	R1	A9	0.9	0.715817	2.5	2.8	1.39841	3	2.9	1.59513	5.13	2.82362	1.8621	1.93776	1.04044	1.33047	0.82665	3.16983
01-01-06-01-01-01-10.mp4	AV	Speech	Fearful	Normal	Kids	R1	A10	0.8	0.636282	4	4.1	0.994429	3.5	3.6	1.26491	6.16	1.70812	0.859574	1.66133	0.929397	0.7796	0.686886	3.40342
01-01-06-01-01-01-11.mp4	AV	Speech	Fearful	Normal	Kids	R1	A11	0.5	0.397676	3.5	3.3	1.1595	3	3.1	1.28668	3.2	2.36768	1.54091	1.31766	0.531403	1.08041	0.647502	3.47012
01-01-06-01-01-01-12.mp4	AV	Speech	Fearful	Normal	Kids	R1	A12	0.9	0.715817	4	4.1	1.19722	4	3.9	1.19722	7.2	2.5179	1.88938	1.44482	1.03158	0.834191	0.90839	3.40342
01-01-06-01-01-01-13.mp4	AV	Speech	Fearful	Normal	Kids	R1	A13	0.2	0.15907	3	2.8	1.13529	3	3.1	1.37032	1.18	2.9627	2.53348	1.76654	1.38888	0.813535	0.60107	3.13648
01-01-06-01-01-01-14.mp4	AV	Speech	Fearful	Normal	Kids	R1	A14	1	0.795352	3.5	3.8	1.13529	4	4.1	0.737865	7.9	1.96822	0.934781	1.14993	0.949349	0.794974	0.630676	3.37002
01-01-06-01-01-01-15.mp4	AV	Speech	Fearful	Normal	Kids	R1	A15	0.7	0.556747	3	3.1	1.1005	3	3	0.942809	4.27	2.43326	2.21052	2.07853	2.02216	0.758528	0.446976	3.30329
01-01-06-01-01-01-16.mp4	AV	Speech	Fearful	Normal	Kids	R1	A16	1	0.795352	4	3.8	0.788811	3.5	3.4	1.07497	7.2	1.91203	1.03033	1.38874	0.916175	1.24484	0.950961	3.70369
01-01-06-01-01-01-17.mp4	AV	Speech	Fearful	Normal	Kids	R1	A17	0.8	0.636282	3.5	3.2	1.31656	3	2.8	1.54919	4.8	1.93815	1.46808	1.7563	1.98746	0.75177	0.79732	3.47012
01-01-06-01-01-01-18.mp4	AV	Speech	Fearful	Normal	Kids	R1	A18	1	0.795352	3.5	3.5	0.849837	3	3.3	1.05935	6.8	1.78417	0.671899	1.92006	1.48862	0.629884	0.460142	3.43677
01-01-06-01-01-01-19.mp4	AV	Speech	Fearful	Normal	Kids	R1	A19	0.7	0.556747	3.5	3.2	1.22927	3	3.4	0.843274	4.62	3.46185	2.7653	1.3269	1.1026	0.805789	0.624978	3.70369
01-01-06-01-01-01-20.mp4	AV	Speech	Fearful	Normal	Kids	R1	A20	0.8	0.636282	4	3.9	1.19722	4	3.5	1.2693	5.92	2.65559	1.29107	2.03854	1.22767	0.995406	1.12527	3.80381
01-01-06-01-01-01-21.mp4	AV	Speech	Fearful	Normal	Kids	R1	A21	0.9	0.715817	3	3.4	1.17379	3	3	1.1547	5.76	2.00293	1.02698	1.13987	1.13144	1.10749	0.674425	3.67033
01-01-06-01-01-01-22.mp4	AV	Speech	Fearful	Normal	Kids	R1	A22	0.9	0.715817	3	3.1	0.875595	2.5	2.9	1.1005	5.4	1.92031	1.12641	1.30245	1.03351	0.779339	0.461125	3.57025
01-01-06-01-01-01-23.mp4	AV	Speech	Fearful	Normal	Kids	R1	A23	0.7	0.556747	3	2.7	1.05935	3	3.3	1.1595	4.2	2.81791	1.94927	2.26755	1.4224	0.958517	0.966698	3.43677
01-01-06-01-01-01-24.mp4	AV	Speech	Fearful	Normal	Kids	R1	A24	1	0.795352	4	3.8	1.0328	2.5	2.8	1.22927	6.6	2.04185	1.02847	1.90696	1.49023	1.1429	1.19834	4.1041
01-01-06-01-01-02-01.mp4	AV	Speech	Fearful	Normal	Kids	R2	A1	0.5	0.397676	3	2.8	1.0328	2.5	2.8	1.22927	2.8	2.92706	1.7002	1.89788	0.985546	0.93773	0.799253	3.63698
01-01-06-01-01-02-02.mp4	AV	Speech	Fearful	Normal	Kids	R2	A2	0.8	0.636282	3.5	3.8	1.13529	3.5	3.1	1.1005	5.52	2.82359	1.72947	1.40992	0.837166	0.775193	0.721031	3.73706
01-01-06-01-01-02-03.mp4	AV	Speech	Fearful	Normal	Kids	R2	A3	0.6	0.477211	4	3.9	1.1005	4	3.6	1.07497	4.5	2.98324	2.40173	2.10817	1.68382	1.03946	0.780216	3.83717
01-01-06-01-01-02-04.mp4	AV	Speech	Fearful	Normal	Kids	R2	A4	0.8	0.636282	4	4.1	0.737865	3.5	3.3	1.05935	5.92	3.41568	2.13837	2.0852	1.3816	1.49349	0.805908	3.23658
01-01-06-01-01-02-05.mp4	AV	Speech	Fearful	Normal	Kids	R2	A5	0.7	0.556747	3	3.1	1.19722	4	3.6	1.17379	4.69	2.12581	1.04597	1.71226	1.23224	1.47283	0.746752	3.37002
01-01-06-01-01-02-06.mp4	AV	Speech	Fearful	Normal	Kids	R2	A6	0.7	0.556747	3	3.6	1.07497	5	4.1	1.37032	5.39	1.81424	0.621588	1.45264	0.677847	1.3169	0.98068	3.43677
01-01-06-01-01-02-07.mp4	AV	Speech	Fearful	Normal	Kids	R2	A7	0.8	0.636282	4	3.8	0.918937	3	3.1	1.1005	5.52	2.06613	0.703163	2.73006	1.58032	1.43562	1.53633	3.5035
01-01-06-01-01-02-08.mp4	AV	Speech	Fearful	Normal	Kids	R2	A8	1	0.795352	4	4	0.942809	4	3.6	1.17379	7.6	2.07482	1.11879	1.63991	0.936942	0.703315	0.592265	3.67033
01-01-06-01-01-02-09.mp4	AV	Speech	Fearful	Normal	Kids	R2	A9	0.8	0.636282	4	4	0.816497	4.5	4	1.1547	6.4	2.02504	0.674251	1.88738	1.07566	1.38535	1.19074	3.16983
01-01-06-01-01-02-10.mp4	AV	Speech	Fearful	Normal	Kids	R2	A10	0.8	0.636282	4	3.9	0.875595	3.5	3.8	0.918937	6.16	1.87197	0.834224	2.31588	1.74865	0.562721	0.531711	3.30331
01-01-06-01-01-02-11.mp4	AV	Speech	Fearful	Normal	Kids	R2	A11	0.4	0.318141	3	3	1.24722	3	3	1.1547	2.4	2.82778	1.40166	1.47016	0.972578	1.13563	0.548478	3.5035
01-01-06-01-01-02-12.mp4	AV	Speech	Fearful	Normal	Kids	R2	A12	0.9	0.715817	4	3.9	0.737865	4	3.8	1.0328	6.93	2.33516	0.85741	2.18038	1.49492	1.502	1.2402	3.5035
01-01-06-01-01-02-13.mp4	AV	Speech	Fearful	Normal	Kids	R2	A13	0.2	0.15907	3	3.1	0.994429	4	3.6	0.699206	1.34	3.10949	1.90205	1.47305	0.921928	0.871312	1.12291	3.16983
01-01-06-01-01-02-14.mp4	AV	Speech	Fearful	Normal	Kids	R2	A14	0.5	0.397676	3.5	3.5	1.08012	4	3.9	0.875595	3.7	2.67604	1.57659	1.66995	0.821642	1.29795	0.945101	3.57023
01-01-06-01-01-02-15.mp4	AV	Speech	Fearful	Normal	Kids	R2	A15	0.7	0.556747	3	3.1	1.1005	3.5	3.4	0.699206	4.55	3.66412	2.30457	1.96962	0.904194	1.08994	1.0425	3.30331
01-01-06-01-01-02-16.mp4	AV	Speech	Fearful	Normal	Kids	R2	A16	0.9	0.715817	4	3.8	0.632456	4	3.5	1.35401	6.57	1.82873	0.881841	2.17566	1.18143	1.07996	0.969935	3.5035
01-01-06-01-01-02-17.mp4	AV	Speech	Fearful	Normal	Kids	R2	A17	1	0.795352	4	3.8	1.0328	3.5	3.6	0.966092	7.4	1.72329	0.775023	1.7612	1.41952	0.678326	0.461674	3.5035
01-01-06-01-01-02-18.mp4	AV	Speech	Fearful	Normal	Kids	R2	A18	0.8	0.636282	4	4.1	0.737865	3.5	3.1	1.19722	5.76	2.39814	1.48003	2.57398	1.99197	1.37488	1.14993	3.4034
01-01-06-01-01-02-19.mp4	AV	Speech	Fearful	Normal	Kids	R2	A19	0.4	0.318141	3.5	3.5	1.08012	3	3.3	0.948683	2.72	2.56347	2.15278	2.19947	0.647181	1.16499	1.25973	3.5035
01-01-06-01-01-02-20.mp4	AV	Speech	Fearful	Normal	Kids	R2	A20	1	0.795352	5	4.2	1.13529	5	4.1	1.37032	8.3	2.48133	1.38472	1.5752	1.10699	0.676771	0.498047	4.37102
01-01-06-01-01-02-21.mp4	AV	Speech	Fearful	Normal	Kids	R2	A21	0.7	0.556747	3	2.6	1.07497	3	2.7	1.41814	3.71	2.82886	1.55806	2.51503	1.71359	1.16078	0.812635	3.77042
01-01-06-01-01-02-22.mp4	AV	Speech	Fearful	Normal	Kids	R2	A22	0.6	0.477211	3	2.5	0.849837	3	3	1.24722	3.3	2.18948	1.39905	1.44721	0.776926	0.717232	0.627108	3.6036
01-01-06-01-01-02-23.mp4	AV	Speech	Fearful	Normal	Kids	R2	A23	0.8	0.636282	3	3.5	1.17851	3.5	3.2	1.47573	5.36	2.25729	1.4716	2.25541	0.898635	1.5496	0.89175	3.23656
01-01-06-01-01-02-24.mp4	AV	Speech	Fearful	Normal	Kids	R2	A24	1	0.795352	4	3.9	0.737865	3.5	3.4	0.966092	7.3	2.74022	1.02898	2.2464	0.844133	0.943994	0.790108	4.07073
01-01-06-01-02-01-01.mp4	AV	Speech	Fearful	Normal	Dogs	R1	A1	0.8	0.636282	2.5	2.6	0.966092	4	3.1	1.28668	4.56	2.70279	1.65924	0.930276	0.549191	1.0346	0.966838	3.43677
01-01-06-01-02-01-02.mp4	AV	Speech	Fearful	Normal	Dogs	R1	A2	0.8	0.636282	3	2.9	0.875595	3	3	1.1547	4.72	1.99876	1.44518	1.82699	1.5844	1.39709	0.897554	3.67033
01-01-06-01-02-01-03.mp4	AV	Speech	Fearful	Normal	Dogs	R1	A3	1	0.795352	5	4.6	0.516398	3	3.1	0.994429	7.7	1.81897	0.641357	2.27705	1.55235	0.956905	0.711572	3.5035
01-01-06-01-02-01-04.mp4	AV	Speech	Fearful	Normal	Dogs	R1	A4	0.6	0.477211	4	3.8	0.918937	4	3.9	1.1005	4.62	2.64645	2.13454	1.40558	0.829749	0.83261	0.99156	3.47012
01-01-06-01-02-01-05.mp4	AV	Speech	Fearful	Normal	Dogs	R1	A5	0.4	0.318141	3	3.4	0.966092	4	3.6	1.3499	2.8	2.42964	2.1834	1.32061	1.17986	0.533962	0.345632	3.13646
01-01-06-01-02-01-06.mp4	AV	Speech	Fearful	Normal	Dogs	R1	A6	1	0.795352	4	3.8	1.13529	4	3.6	1.07497	7.4	2.63018	1.36399	2.4002	1.19917	1.76536	1.15233	3.57025
01-01-06-01-02-01-07.mp4	AV	Speech	Fearful	Normal	Dogs	R1	A7	0.6	0.477211	4	4	0.666667	4	3.7	0.948683	4.62	2.40216	1.04381	2.06888	1.84952	1.02567	0.835098	3.43677
01-01-06-01-02-01-08.mp4	AV	Speech	Fearful	Normal	Dogs	R1	A8	0.9	0.715817	4	4	0.942809	4.5	4.1	1.28668	7.29	2.10519	1.31005	1.90036	1.30562	0.790001	0.62797	3.77044
01-01-06-01-02-01-09.mp4	AV	Speech	Fearful	Normal	Dogs	R1	A9	0.8	0.636282	4.5	4.2	0.918937	5	4.2	1.31656	6.72	2.31939	2.14644	1.48795	1.02945	0.979916	0.834666	3.13648
01-01-06-01-02-01-10.mp4	AV	Speech	Fearful	Normal	Dogs	R1	A10	1	0.795352	4	3.5	0.971825	4	4	1.24722	7.5	2.00616	1.3707	2.05012	1.36422	1.13803	0.753446	3.53685
01-01-06-01-02-01-11.mp4	AV	Speech	Fearful	Normal	Dogs	R1	A11	0.7	0.556747	3	2.7	0.948683	3	3.4	1.07497	4.27	2.83025	1.9085	2.051	1.61038	1.25458	0.712945	3.16983
01-01-06-01-02-01-12.mp4	AV	Speech	Fearful	Normal	Dogs	R1	A12	0.8	0.636282	4	3.7	0.948683	4	3.6	0.843274	5.84	2.91272	1.18399	1.66637	1.87403	0.538413	0.319179	3.37002
01-01-06-01-02-01-13.mp4	AV	Speech	Fearful	Normal	Dogs	R1	A13	0.3	0.238606	3	2.9	0.994429	3	3.2	1.0328	1.83	2.45528	1.58876	1.00385	0.840464	1.20354	0.73028	3.20321
01-01-06-01-02-01-14.mp4	AV	Speech	Fearful	Normal	Dogs	R1	A14	0.9	0.715817	4	3.7	0.948683	3.5	3.6	0.966092	6.57	1.8082	1.16021	2.1515	1.53728	0.892634	0.384441	3.37004
01-01-06-01-02-01-15.mp4	AV	Speech	Fearful	Normal	Dogs	R1	A15	0.8	0.636282	3	3.4	0.516398	4	3.9	0.737865	5.84	2.52057	1.44706	2.56073	2.08663	0.784965	0.691424	3.26994
01-01-06-01-02-01-16.mp4	AV	Speech	Fearful	Normal	Dogs	R1	A16	0.9	0.715817	4	3.9	0.875595	3	3	1.56347	6.21	1.75947	0.636359	2.5736	1.98134	1.14086	0.845011	3.63696
01-01-06-01-02-01-17.mp4	AV	Speech	Fearful	Normal	Dogs	R1	A17	1	0.795352	3	3.3	1.05935	3	3.3	1.25167	6.6	2.70339	2.30985	1.51462	0.932417	1.03451	1.13265	3.53688
01-01-06-01-02-01-18.mp4	AV	Speech	Fearful	Normal	Dogs	R1	A18	0.9	0.715817	3.5	3.6	0.966092	4	4.1	0.567646	6.93	2.7563	1.55634	1.32057	0.733105	0.880385	1.09314	3.47012
01-01-06-01-02-01-19.mp4	AV	Speech	Fearful	Normal	Dogs	R1	A19	1	0.795352	3.5	3.4	0.699206	3	2.9	1.1005	6.3	1.89505	1.15933	1.54087	1.15809	0.912731	0.626288	3.77044
01-01-06-01-02-01-20.mp4	AV	Speech	Fearful	Normal	Dogs	R1	A20	1	0.795352	5	4.4	0.843274	4	3.9	1.1005	8.3	1.58678	0.916545	1.20802	0.648661	0.470247	0.368138	3.93727
01-01-06-01-02-01-21.mp4	AV	Speech	Fearful	Normal	Dogs	R1	A21	0.8	0.636282	3.5	3.4	1.07497	3.5	3.3	1.33749	5.36	2.77678	2.20271	2.36787	1.51805	1.16036	0.855029	3.97063
01-01-06-01-02-01-22.mp4	AV	Speech	Fearful	Normal	Dogs	R1	A22	0.4	0.318141	3	2.6	1.07497	2	2.1	0.994429	1.88	3.73871	1.883	2.206	1.02809	0.871476	0.934531	3.67033
01-01-06-01-02-01-23.mp4	AV	Speech	Fearful	Normal	Dogs	R1	A23	0.5	0.397676	3	2.8	1.0328	3	3.5	0.707107	3.15	3.00964	1.54799	1.22596	0.601531	1.07161	1.08843	3.13646
01-01-06-01-02-01-24.mp4	AV	Speech	Fearful	Normal	Dogs	R1	A24	0.9	0.715817	4	4.1	0.737865	4	3.8	1.31656	7.11	1.87824	0.698773	2.13052	1.59404	0.790266	0.675762	3.93725
01-01-06-01-02-02-01.mp4	AV	Speech	Fearful	Normal	Dogs	R2	A1	0.6	0.477211	3	3.4	0.843274	2.5	2.5	1.2693	3.54	3.63522	2.27716	1.88713	1.77312	0.93027	0.770588	3.70369
01-01-06-01-02-02-02.mp4	AV	Speech	Fearful	Normal	Dogs	R2	A2	0.8	0.636282	4	3.9	0.875595	3	3	1.76383	5.52	1.66992	1.09509	2.06488	1.66277	1.14026	1.1876	3.73706
01-01-06-01-02-02-03.mp4	AV	Speech	Fearful	Normal	Dogs	R2	A3	0.8	0.636282	4.5	4.5	0.527046	4	3.8	1.31656	6.64	1.98454	0.849554	1.83803	0.627221	1.34611	1.30978	3.20321
01-01-06-01-02-02-04.mp4	AV	Speech	Fearful	Normal	Dogs	R2	A4	0.6	0.477211	4	4.1	0.737865	3.5	3.1	1.37032	4.32	2.13189	1.62227	1.67987	0.880708	1.08597	0.689752	3.47012
01-01-06-01-02-02-05.mp4	AV	Speech	Fearful	Normal	Dogs	R2	A5	0.8	0.636282	4	3.9	0.737865	4	3.8	0.632456	6.16	2.44329	0.848292	3.15744	2.21895	1.39346	1.28926	3.06973
01-01-06-01-02-02-06.mp4	AV	Speech	Fearful	Normal	Dogs	R2	A6	1	0.795352	3.5	3.6	0.699206	4	3.7	1.1595	7.3	2.11055	0.873937	1.71171	1.00874	1.17697	0.95621	3.5035
01-01-06-01-02-02-07.mp4	AV	Speech	Fearful	Normal	Dogs	R2	A7	0.7	0.556747	4	3.8	1.0328	3	3.4	1.07497	5.04	1.98667	0.672315	2.27415	1.72382	1.07634	0.931565	3.37004
01-01-06-01-02-02-08.mp4	AV	Speech	Fearful	Normal	Dogs	R2	A8	0.9	0.715817	4	4.1	0.875595	4	4	0.816497	7.29	2.56059	2.19862	1.78628	1.1147	1.22347	1.15589	3.67033
01-01-06-01-02-02-09.mp4	AV	Speech	Fearful	Normal	Dogs	R2	A9	0.9	0.715817	3.5	3.7	0.823273	4	4	1.05409	6.93	2.33499	1.49569	2.04272	1.88114	1.07589	0.900882	3.13646
01-01-06-01-02-02-10.mp4	AV	Speech	Fearful	Normal	Dogs	R2	A10	1	0.795352	4	4	0.816497	4	4	0.942809	8	2.15837	1.24016	2.04304	1.75245	0.652001	0.427469	3.43677
01-01-06-01-02-02-11.mp4	AV	Speech	Fearful	Normal	Dogs	R2	A11	0.8	0.636282	3	2.6	0.843274	3	3	0.942809	4.48	3.52723	2.33937	1.33863	0.652309	0.606913	0.393233	3.20321
01-01-06-01-02-02-12.mp4	AV	Speech	Fearful	Normal	Dogs	R2	A12	0.4	0.318141	4	3.8	0.788811	3	3	1.1547	2.72	2.42282	1.39433	1.35299	0.735661	0.79606	0.636434	3.20321
01-01-06-01-02-02-13.mp4	AV	Speech	Fearful	Normal	Dogs	R2	A13	0.1	0.0795352	2.5	2.9	1.1005	4	3.9	0.875595	0.68	2.17071	1.39159	1.38775	0.88908	1.00232	0.634433	3.23656
01-01-06-01-02-02-14.mp4	AV	Speech	Fearful	Normal	Dogs	R2	A14	1	0.795352	4	3.7	1.25167	3.5	3.3	1.33749	7	2.64661	1.2928	2.52536	1.61866	0.970447	0.646613	3.37002
01-01-06-01-02-02-15.mp4	AV	Speech	Fearful	Normal	Dogs	R2	A15	0.9	0.715817	3	3.4	1.17379	4	3.8	1.0328	6.48	2.4525	1.58793	1.71259	0.919661	1.66894	1.27651	3.30329
01-01-06-01-02-02-16.mp4	AV	Speech	Fearful	Normal	Dogs	R2	A16	1	0.795352	4	4.3	0.674949	4	4	0.816497	8.3	2.49762	1.26681	1.51422	0.945889	0.627387	0.666516	3.57023
01-01-06-01-02-02-17.mp4	AV	Speech	Fearful	Normal	Dogs	R2	A17	0.5	0.397676	4	4.1	0.567646	3	3.1	1.66333	3.6	2.38649	0.871141	1.98344	0.939982	1.07	0.67276	3.63696
01-01-06-01-02-02-18.mp4	AV	Speech	Fearful	Normal	Dogs	R2	A18	0.8	0.636282	4	4.1	0.737865	4	3.6	1.57762	6.16	2.65708	1.75101	2.10213	1.07243	0.639326	0.429024	3.47015
01-01-06-01-02-02-19.mp4	AV	Speech	Fearful	Normal	Dogs	R2	A19	0.8	0.636282	4	4	1.24722	4	4	1.24722	6.4	1.57455	0.805151	1.62329	0.767341	1.09563	1.04401	3.53688
01-01-06-01-02-02-20.mp4	AV	Speech	Fearful	Normal	Dogs	R2	A20	1	0.795352	5	4.5	0.849837	4.5	4.1	1.1005	8.6	1.99345	0.518356	2.07664	1.96458	0.863991	0.667806	3.30329
01-01-06-01-02-02-21.mp4	AV	Speech	Fearful	Normal	Dogs	R2	A21	0.9	0.715817	3	3.2	1.31656	3	3.3	1.33749	5.85	1.53032	0.69401	2.51786	1.76441	0.875257	0.924862	4.07073
01-01-06-01-02-02-22.mp4	AV	Speech	Fearful	Normal	Dogs	R2	A22	0.4	0.318141	2	2.2	0.918937	2	2.2	1.0328	1.76	3.24971	2.04009	1.44566	0.809946	0.929157	0.69214	3.53688
01-01-06-01-02-02-23.mp4	AV	Speech	Fearful	Normal	Dogs	R2	A23	0.9	0.715817	3	3.2	0.788811	3	3.1	0.875595	5.67	2.22902	1.25783	1.96226	1.76323	0.879931	0.976261	3.1031
01-01-06-01-02-02-24.mp4	AV	Speech	Fearful	Normal	Dogs	R2	A24	0.9	0.715817	4	4.3	0.483046	4	3.4	1.3499	6.93	2.13306	1.71576	2.3033	1.62652	1.26506	1.2629	4.004
01-01-06-02-01-01-01.mp4	AV	Speech	Fearful	Strong	Kids	R1	A1	1	0.795352	4	3.8	0.788811	3	3	1.1547	6.8	2.32437	1.52107	1.36815	1.17597	1.26292	1.4158	5.005
01-01-06-02-01-01-02.mp4	AV	Speech	Fearful	Strong	Kids	R1	A2	0.9	0.715817	4	4	0.666667	4	4.2	0.632456	7.38	2.56794	1.44436	1.93077	1.36813	1.03831	1.34309	3.80379
01-01-06-02-01-01-03.mp4	AV	Speech	Fearful	Strong	Kids	R1	A3	0.9	0.715817	5	4.8	0.421637	4.5	4.1	1.28668	8.01	2.00106	0.668815	2.11923	1.60229	0.918564	0.661321	3.30331
01-01-06-02-01-01-04.mp4	AV	Speech	Fearful	Strong	Kids	R1	A4	0.6	0.477211	5	4.6	0.699206	3	3.2	1.54919	4.68	2.52549	1.24091	1.8013	1.0025	1.23285	0.845715	3.93727
01-01-06-02-01-01-05.mp4	AV	Speech	Fearful	Strong	Kids	R1	A5	0.9	0.715817	5	5	0	5	4.5	0.971825	8.55	2.70703	1.60109	1.30127	0.62558	1.26211	1.10347	3.23656
01-01-06-02-01-01-06.mp4	AV	Speech	Fearful	Strong	Kids	R1	A6	0.4	0.318141	5	4.7	0.674949	4	3.3	1.70294	3.2	3.22406	2.31853	1.33421	0.745229	1.57237	0.813119	3.63698
01-01-06-02-01-01-07.mp4	AV	Speech	Fearful	Strong	Kids	R1	A7	1	0.795352	4	4.3	0.674949	4	3.8	1.0328	8.1	2.03555	1.30777	1.3322	0.619304	0.988089	1.04892	3.63698
01-01-06-02-01-01-08.mp4	AV	Speech	Fearful	Strong	Kids	R1	A8	1	0.795352	5	4.9	0.316228	4.5	4	1.41421	8.9	1.45305	0.707046	1.39931	0.740445	0.545262	0.614906	3.97063
01-01-06-02-01-01-09.mp4	AV	Speech	Fearful	Strong	Kids	R1	A9	1	0.795352	5	4.7	0.483046	3.5	3.2	1.47573	7.9	2.20775	1.38565	2.09528	1.41906	0.95844	0.783377	3.23656
01-01-06-02-01-01-10.mp4	AV	Speech	Fearful	Strong	Kids	R1	A10	1	0.795352	4.5	4.2	0.918937	4	3.3	1.41814	7.5	2.15868	1.23512	2.08849	1.33227	1.31644	1.10884	3.5035
01-01-06-02-01-01-11.mp4	AV	Speech	Fearful	Strong	Kids	R1	A11	1	0.795352	5	4.4	0.966092	4	3.9	1.37032	8.3	2.00079	0.6839	1.77241	1.10489	0.752323	0.655015	3.20321
01-01-06-02-01-01-12.mp4	AV	Speech	Fearful	Strong	Kids	R1	A12	0.7	0.556747	4	4	0.942809	3	3.5	0.971825	5.25	1.93133	0.871969	2.19899	1.3711	0.760675	0.4318	3.73708
01-01-06-02-01-01-13.mp4	AV	Speech	Fearful	Strong	Kids	R1	A13	0.2	0.15907	2.5	2.9	1.28668	2.5	2.8	1.13529	1.14	3.07567	1.68461	1.75595	1.34699	1.1855	0.776862	3.37004
01-01-06-02-01-01-14.mp4	AV	Speech	Fearful	Strong	Kids	R1	A14	0.9	0.715817	5	4.6	0.516398	4	3.7	1.1595	7.47	2.49479	1.55184	1.38137	0.767045	1.34744	0.745259	3.37002
01-01-06-02-01-01-15.mp4	AV	Speech	Fearful	Strong	Kids	R1	A15	1	0.795352	4	3.8	1.13529	3	3.4	1.07497	7.2	2.63108	2.09074	1.32878	0.962107	0.7878	0.750816	3.33667
01-01-06-02-01-01-16.mp4	AV	Speech	Fearful	Strong	Kids	R1	A16	0.8	0.636282	4.5	4.4	0.699206	4	3.7	0.948683	6.48	2.07059	0.727824	2.03735	1.10641	0.886156	0.481101	3.73706
01-01-06-02-01-01-17.mp4	AV	Speech	Fearful	Strong	Kids	R1	A17	0.4	0.318141	4	3.7	1.25167	3	3.1	1.44914	2.72	3.61539	2.19694	1.51749	0.940322	0.77441	0.48121	3.70371
01-01-06-02-01-01-18.mp4	AV	Speech	Fearful	Strong	Kids	R1	A18	0.8	0.636282	5	4.5	0.707107	5	4.5	0.849837	7.2	2.47679	1.48773	1.35042	0.916852	0.497798	0.485952	3.73708
01-01-06-02-01-01-19.mp4	AV	Speech	Fearful	Strong	Kids	R1	A19	0.2	0.15907	5	4.6	0.699206	5	4.3	1.05935	1.78	2.23304	0.981812	2.29507	1.92363	0.586463	0.540948	3.83717
01-01-06-02-01-01-20.mp4	AV	Speech	Fearful	Strong	Kids	R1	A20	0.9	0.715817	5	4.7	0.483046	4.5	4.2	1.0328	8.01	2.06705	1.50774	1.94237	1.60103	1.19387	1.10798	4.23756
01-01-06-02-01-01-21.mp4	AV	Speech	Fearful	Strong	Kids	R1	A21	0.9	0.715817	4.5	4.2	1.0328	3	2.9	1.85293	6.39	2.10754	0.759402	1.19262	0.700413	1.04447	1.07782	3.97063
01-01-06-02-01-01-22.mp4	AV	Speech	Fearful	Strong	Kids	R1	A22	0.9	0.715817	3.5	3.5	1.08012	3	2.6	1.3499	5.49	2.756	1.34696	2.80168	1.64194	1.33023	0.622566	3.57023
01-01-06-02-01-01-23.mp4	AV	Speech	Fearful	Strong	Kids	R1	A23	1	0.795352	4	3.9	0.737865	3.5	3.2	1.0328	7.1	1.82408	0.374744	1.74502	0.649464	1.12774	0.88474	3.57023
01-01-06-02-01-01-24.mp4	AV	Speech	Fearful	Strong	Kids	R1	A24	0.7	0.556747	5	4.6	0.516398	1	1.5	0.971825	4.27	1.58874	0.404757	1.82664	1.14637	1.08853	0.68153	3.83717
01-01-06-02-01-02-01.mp4	AV	Speech	Fearful	Strong	Kids	R2	A1	0.8	0.636282	4	4	0.816497	4.5	3.5	1.84089	6	2.25781	1.23174	1.89413	1.21638	0.870039	0.636167	4.23756
01-01-06-02-01-02-02.mp4	AV	Speech	Fearful	Strong	Kids	R2	A2	0.8	0.636282	4	4.1	0.737865	4.5	4	1.24722	6.48	3.18045	2.11532	1.62629	1.10244	1.33391	1.2574	3.63698
01-01-06-02-01-02-03.mp4	AV	Speech	Fearful	Strong	Kids	R2	A3	0.9	0.715817	5	4.8	0.421637	5	4.3	1.1595	8.19	3.18541	2.711	1.86335	0.988482	1.13848	0.896763	3.9039
01-01-06-02-01-02-04.mp4	AV	Speech	Fearful	Strong	Kids	R2	A4	0.7	0.556747	5	4.6	0.516398	4	3.8	1.39841	5.88	1.50925	0.831815	2.03281	1.9468	0.708964	0.554945	3.4034
01-01-06-02-01-02-05.mp4	AV	Speech	Fearful	Strong	Kids	R2	A5	1	0.795352	5	4.6	0.516398	4	3.6	0.966092	8.2	1.88606	0.983383	1.64987	1.41024	0.940845	0.636301	3.57023
01-01-06-02-01-02-06.mp4	AV	Speech	Fearful	Strong	Kids	R2	A6	0.7	0.556747	5	4.7	0.483046	4	4	1.05409	6.09	3.20418	1.49397	1.27631	0.808269	0.713703	0.635736	3.6036
01-01-06-02-01-02-07.mp4	AV	Speech	Fearful	Strong	Kids	R2	A7	0.9	0.715817	4	3.8	0.632456	4	3.8	0.918937	6.84	2.21269	1.89767	1.66335	1.35412	0.781299	0.585783	3.47012
01-01-06-02-01-02-08.mp4	AV	Speech	Fearful	Strong	Kids	R2	A8	1	0.795352	4	4.1	0.737865	4	3.9	0.875595	8	2.83363	1.72286	1.41201	0.820808	0.837988	0.782437	3.9039
01-01-06-02-01-02-09.mp4	AV	Speech	Fearful	Strong	Kids	R2	A9	0.9	0.715817	4	4	0.942809	3.5	3.3	1.56702	6.57	2.18126	0.729271	2.00584	1.44928	1.57491	1.47002	3.26994
01-01-06-02-01-02-10.mp4	AV	Speech	Fearful	Strong	Kids	R2	A10	0.9	0.715817	4	4.2	0.788811	4	3.9	0.737865	7.29	2.59532	1.94465	2.8257	2.17448	1.45804	1.12313	3.70371
01-01-06-02-01-02-11.mp4	AV	Speech	Fearful	Strong	Kids	R2	A11	1	0.795352	4	3.6	0.843274	3	3.3	0.823273	6.9	2.5044	1.26651	2.29576	1.19385	1.11844	0.75466	3.20321
01-01-06-02-01-02-12.mp4	AV	Speech	Fearful	Strong	Kids	R2	A12	0.5	0.397676	5	4.7	0.483046	3	3.2	1.31656	3.95	2.73954	1.65349	1.24638	0.733716	1.42183	1.26864	3.70371
01-01-06-02-01-02-13.mp4	AV	Speech	Fearful	Strong	Kids	R2	A13	0.2	0.15907	3.5	3.5	0.849837	3.5	3.2	1.31656	1.34	2.49333	1.37747	1.70744	0.74603	0.787233	0.587153	3.26994
01-01-06-02-01-02-14.mp4	AV	Speech	Fearful	Strong	Kids	R2	A14	0.9	0.715817	5	4.7	0.483046	4	3.6	1.07497	7.47	2.20094	1.27121	1.90068	2.0781	1.3149	1.23144	3.4034
01-01-06-02-01-02-15.mp4	AV	Speech	Fearful	Strong	Kids	R2	A15	0.9	0.715817	3	3.6	0.843274	3	3	1.24722	5.94	2.84963	1.79954	1.74835	1.24791	0.910257	0.680394	3.47015
01-01-06-02-01-02-16.mp4	AV	Speech	Fearful	Strong	Kids	R2	A16	1	0.795352	5	4.6	0.516398	5	4.3	1.05935	8.9	2.47348	2.23434	2.40506	2.2587	0.728743	0.62046	3.73706
01-01-06-02-01-02-17.mp4	AV	Speech	Fearful	Strong	Kids	R2	A17	0.6	0.477211	4	3.9	0.316228	3.5	3	1.1547	4.14	2.09384	1.53967	1.59286	1.31905	0.87096	1.3506	3.73706
01-01-06-02-01-02-18.mp4	AV	Speech	Fearful	Strong	Kids	R2	A18	1	0.795352	5	4.5	0.849837	3	3	1.76383	7.5	2.95541	1.58481	2.3936	1.19216	1.09224	0.515382	4.17083
01-01-06-02-01-02-19.mp4	AV	Speech	Fearful	Strong	Kids	R2	A19	0.5	0.397676	4.5	4.2	1.0328	3.5	3.1	1.72884	3.65	2.409	1.9163	1.74025	1.37221	0.502385	0.514247	4.37102
01-01-06-02-01-02-20.mp4	AV	Speech	Fearful	Strong	Kids	R2	A20	1	0.795352	5	4.9	0.316228	3.5	3.3	1.70294	8.2	2.27699	1.1626	1.72697	1.07214	1.49863	1.09681	4.17083
01-01-06-02-01-02-21.mp4	AV	Speech	Fearful	Strong	Kids	R2	A21	0.9	0.715817	4.5	4.1	1.28668	3.5	3.6	1.42984	6.93	2.61648	1.7412	2.77527	1.73227	0.970735	0.912552	3.83717
01-01-06-02-01-02-22.mp4	AV	Speech	Fearful	Strong	Kids	R2	A22	0.6	0.477211	3.5	3.7	0.823273	3	3.2	1.13529	4.14	2.01589	1.17273	1.45833	1.18372	0.992555	0.805647	3.57023
01-01-06-02-01-02-23.mp4	AV	Speech	Fearful	Strong	Kids	R2	A23	0.5	0.397676	3	2.9	1.19722	3	3	1.41421	2.95	2.5663	1.27471	1.75252	0.802085	0.825855	0.456647	3.43677
01-01-06-02-01-02-24.mp4	AV	Speech	Fearful	Strong	Kids	R2	A24	0.7	0.556747	5	4.7	0.483046	4	3.6	1.50555	5.81	2.31768	1.44668	1.64248	1.04513	0.42836	0.151094	4.07073
01-01-06-02-02-01-01.mp4	AV	Speech	Fearful	Strong	Dogs	R1	A1	0.9	0.715817	5	4.6	0.516398	4	3.8	1.39841	7.56	2.62773	1.7741	1.55739	0.712405	0.685808	0.457213	3.97063
01-01-06-02-02-01-02.mp4	AV	Speech	Fearful	Strong	Dogs	R1	A2	0.7	0.556747	4	4.2	0.632456	4	3.8	1.0328	5.6	2.27327	1.30582	2.06953	1.38296	1.60008	1.3745	3.6036
01-01-06-02-02-01-03.mp4	AV	Speech	Fearful	Strong	Dogs	R1	A3	0.8	0.636282	5	4.6	0.699206	4	3.6	1.50555	6.56	2.11436	1.27452	1.7874	0.934911	0.934529	0.677839	3.30331
01-01-06-02-02-01-04.mp4	AV	Speech	Fearful	Strong	Dogs	R1	A4	0.8	0.636282	5	4.7	0.483046	4	3.7	1.1595	6.72	2.41966	1.97919	1.71044	1.23228	0.726645	0.443395	3.6036
01-01-06-02-02-01-05.mp4	AV	Speech	Fearful	Strong	Dogs	R1	A5	0.9	0.715817	5	4.9	0.316228	4.5	4.1	1.28668	8.1	2.17308	1.25594	1.65904	1.38539	0.984056	0.665278	3.23656
01-01-06-02-02-01-06.mp4	AV	Speech	Fearful	Strong	Dogs	R1	A6	0.9	0.715817	5	4.3	1.33749	4.5	3.6	1.7127	7.11	2.15048	1.62023	1.28508	1.2106	0.616598	0.426338	3.73706
01-01-06-02-02-01-07.mp4	AV	Speech	Fearful	Strong	Dogs	R1	A7	0.7	0.556747	4.5	4.5	0.527046	4	4.1	1.19722	6.02	1.63085	1.18649	2.03894	1.29512	0.702272	0.7652	3.4034
01-01-06-02-02-01-08.mp4	AV	Speech	Fearful	Strong	Dogs	R1	A8	0.9	0.715817	5	4.6	0.516398	4	4.1	0.994429	7.83	2.10269	0.512496	2.25996	1.8527	0.873389	0.591471	3.87052
01-01-06-02-02-01-09.mp4	AV	Speech	Fearful	Strong	Dogs	R1	A9	1	0.795352	5	4.7	0.674949	4.5	4.1	1.1005	8.8	1.95013	1.21678	0.993416	0.662515	0.618101	0.546464	3.23656
01-01-06-02-02-01-10.mp4	AV	Speech	Fearful	Strong	Dogs	R1	A10	0.7	0.556747	4	4	0.816497	4	3.7	1.33749	5.39	2.76662	1.25587	1.88925	1.33562	1.4517	1.27647	3.80379
01-01-06-02-02-01-11.mp4	AV	Speech	Fearful	Strong	Dogs	R1	A11	0.9	0.715817	5	4.5	0.707107	4	3.8	1.13529	7.47	1.68686	1.30746	1.46573	0.962789	0.982681	0.821629	3.06975
01-01-06-02-02-01-12.mp4	AV	Speech	Fearful	Strong	Dogs	R1	A12	0.6	0.477211	5	4.8	0.421637	4	3.7	0.948683	5.1	2.34576	1.84644	1.88425	0.999637	1.26879	0.73962	3.47015
01-01-06-02-02-01-13.mp4	AV	Speech	Fearful	Strong	Dogs	R1	A13	0.1	0.0795352	4	3.6	1.3499	3.5	3.7	0.823273	0.73	3.50365	2.31583	1.31216	0.850138	1.36452	1.0497	3.5035
01-01-06-02-02-01-14.mp4	AV	Speech	Fearful	Strong	Dogs	R1	A14	1	0.795352	4	4.2	0.421637	4	3.6	1.07497	7.8	2.09868	1.17887	1.55434	1.08374	1.19385	0.854428	3.5035
01-01-06-02-02-01-15.mp4	AV	Speech	Fearful	Strong	Dogs	R1	A15	0.8	0.636282	3.5	3.5	0.849837	4	3.7	0.948683	5.76	1.75016	1.08745	1.52334	1.12846	0.988651	0.918918	3.37002
01-01-06-02-02-01-16.mp4	AV	Speech	Fearful	Strong	Dogs	R1	A16	0.9	0.715817	5	4.6	0.699206	4.5	3.9	1.59513	7.65	2.04257	0.847201	1.41187	0.929211	0.925837	0.550989	3.53685
01-01-06-02-02-01-17.mp4	AV	Speech	Fearful	Strong	Dogs	R1	A17	0.7	0.556747	4	4	0.816497	3	2.9	1.37032	4.83	3.11811	0.792657	1.52295	1.44167	0.695903	0.72501	3.67033
01-01-06-02-02-01-18.mp4	AV	Speech	Fearful	Strong	Dogs	R1	A18	1	0.795352	5	4.6	0.699206	4	4.1	0.737865	8.7	1.50827	0.562071	1.80485	1.63408	0.736799	0.676884	3.80381
01-01-06-02-02-01-19.mp4	AV	Speech	Fearful	Strong	Dogs	R1	A19	0.9	0.715817	5	4.7	0.674949	4.5	4.3	0.823273	8.1	2.24111	1.71586	2.41106	1.47347	1.37511	0.890452	3.57023
01-01-06-02-02-01-20.mp4	AV	Speech	Fearful	Strong	Dogs	R1	A20	0.9	0.715817	5	4.9	0.316228	5	4.1	1.28668	8.1	2.57999	1.15621	1.35817	0.933106	1.30552	1.35415	3.87054
01-01-06-02-02-01-21.mp4	AV	Speech	Fearful	Strong	Dogs	R1	A21	0.9	0.715817	4	3.9	0.737865	3	3.1	1.28668	6.3	1.80267	0.811853	2.11317	1.83633	0.984988	0.701103	3.77044
01-01-06-02-02-01-22.mp4	AV	Speech	Fearful	Strong	Dogs	R1	A22	0.9	0.715817	4	3.9	0.875595	4	3.6	1.3499	6.75	1.72936	0.990852	1.59377	1.26206	1.1418	1.34494	3.67033
01-01-06-02-02-01-23.mp4	AV	Speech	Fearful	Strong	Dogs	R1	A23	0.7	0.556747	3	3.4	0.843274	4	3.5	1.17851	4.83	2.6435	2.20046	1.73649	1.09318	0.973392	0.883962	3.57025
01-01-06-02-02-01-24.mp4	AV	Speech	Fearful	Strong	Dogs	R1	A24	0.8	0.636282	5	4.3	1.1595	3	3	1.49071	5.84	2.11095	1.43235	1.86923	1.28386	1.20469	0.693659	3.60358
01-01-06-02-02-02-01.mp4	AV	Speech	Fearful	Strong	Dogs	R2	A1	0.9	0.715817	5	4.4	0.966092	4.5	3.8	1.54919	7.38	2.05101	1.02022	1.09047	0.538908	0.538515	0.41009	3.90392
01-01-06-02-02-02-02.mp4	AV	Speech	Fearful	Strong	Dogs	R2	A2	1	0.795352	4	4	0.666667	4	3.8	0.918937	7.8	1.88671	1.22365	1.73541	0.871729	0.731143	0.627983	3.6036
01-01-06-02-02-02-03.mp4	AV	Speech	Fearful	Strong	Dogs	R2	A3	1	0.795352	5	5	0	5	4.5	0.707107	9.5	1.69502	0.804534	1.39906	1.06408	0.597471	0.461068	3.43677
01-01-06-02-02-02-04.mp4	AV	Speech	Fearful	Strong	Dogs	R2	A4	0.6	0.477211	4	4.3	0.674949	3	3	1.33333	4.38	1.63325	0.67415	1.28754	0.855475	1.00588	0.850286	3.57023
01-01-06-02-02-02-05.mp4	AV	Speech	Fearful	Strong	Dogs	R2	A5	0.9	0.715817	5	4.4	0.843274	3.5	3.3	1.33749	6.93	1.89013	0.790377	1.00374	0.612024	0.801457	0.533069	3.1031
01-01-06-02-02-02-06.mp4	AV	Speech	Fearful	Strong	Dogs	R2	A6	0.6	0.477211	5	4.7	0.674949	4	3.7	1.49443	5.04	2.44147	1.32998	1.8399	1.04248	1.06028	1.27409	3.73706
01-01-06-02-02-02-07.mp4	AV	Speech	Fearful	Strong	Dogs	R2	A7	0.8	0.636282	4	3.9	0.567646	4	3.9	0.875595	6.24	2.96902	1.11422	1.641	0.607932	1.09649	0.641312	3.5035
01-01-06-02-02-02-08.mp4	AV	Speech	Fearful	Strong	Dogs	R2	A8	0.9	0.715817	4	4.3	0.674949	4.5	4.1	1.28668	7.56	1.54532	0.863076	1.60311	1.74321	0.679107	0.526635	3.93727
01-01-06-02-02-02-09.mp4	AV	Speech	Fearful	Strong	Dogs	R2	A9	1	0.795352	4	4	1.24722	3	2.9	1.44914	6.9	1.99802	0.412678	1.86318	0.5262	0.662228	0.340814	3.23656
01-01-06-02-02-02-10.mp4	AV	Speech	Fearful	Strong	Dogs	R2	A10	0.2	0.15907	4	3.8	0.918937	3	3.2	1.13529	1.4	1.60254	0.737336	1.49546	1.6033	0.86583	0.627254	3.87054
01-01-06-02-02-02-11.mp4	AV	Speech	Fearful	Strong	Dogs	R2	A11	0.8	0.636282	4.5	4.1	1.28668	4	3.8	0.788811	6.32	3.19288	1.30597	1.89145	1.34238	1.32262	0.6028	3.13646
01-01-06-02-02-02-12.mp4	AV	Speech	Fearful	Strong	Dogs	R2	A12	0.6	0.477211	5	4.4	0.966092	3.5	3.2	1.61933	4.56	3.19608	2.15784	1.86778	1.38016	0.758636	0.350195	3.67033
01-01-06-02-02-02-13.mp4	AV	Speech	Fearful	Strong	Dogs	R2	A13	0.5	0.397676	2	2.3	0.483046	4	3.6	0.843274	2.95	2.91748	2.02332	1.9685	0.93302	1.36296	0.337807	3.20321
01-01-06-02-02-02-14.mp4	AV	Speech	Fearful	Strong	Dogs	R2	A14	0.9	0.715817	4.5	4.3	0.823273	4	4.2	0.788811	7.65	2.49406	1.69218	1.10741	1.06295	0.377818	0.333709	3.47012
01-01-06-02-02-02-15.mp4	AV	Speech	Fearful	Strong	Dogs	R2	A15	1	0.795352	4	3.8	0.632456	4	3.5	1.17851	7.3	2.40795	1.79757	2.26365	1.39428	1.42939	1.38201	3.5035
01-01-06-02-02-02-16.mp4	AV	Speech	Fearful	Strong	Dogs	R2	A16	0.8	0.636282	5	4.9	0.316228	5	4.4	1.26491	7.44	2.49623	2.15905	1.81727	1.48859	1.30947	1.36448	3.5035
01-01-06-02-02-02-17.mp4	AV	Speech	Fearful	Strong	Dogs	R2	A17	0.5	0.397676	4	4.1	0.567646	3	3.3	0.948683	3.7	3.06884	1.61139	2.28328	1.70116	1.16222	0.920983	3.83717
01-01-06-02-02-02-18.mp4	AV	Speech	Fearful	Strong	Dogs	R2	A18	0.8	0.636282	4	4.4	0.516398	3.5	3	1.82574	5.92	2.18037	1.45124	2.21426	1.70541	1.53679	1.09434	3.80379
01-01-06-02-02-02-19.mp4	AV	Speech	Fearful	Strong	Dogs	R2	A19	0.9	0.715817	5	4.6	0.699206	3.5	3.6	0.966092	7.38	2.19601	1.42739	2.03118	1.4936	0.769454	0.447665	4.03735
01-01-06-02-02-02-20.mp4	AV	Speech	Fearful	Strong	Dogs	R2	A20	0.9	0.715817	5	4.9	0.316228	3.5	3.5	1.2693	7.56	1.96446	1.93112	1.54399	1.70868	0.903952	0.875968	3.90392
01-01-06-02-02-02-21.mp4	AV	Speech	Fearful	Strong	Dogs	R2	A21	0.7	0.556747	3	3.2	1.13529	2	2.2	1.13529	3.78	1.78206	2.05248	1.59516	0.964877	0.967722	0.923123	3.63696
01-01-06-02-02-02-22.mp4	AV	Speech	Fearful	Strong	Dogs	R2	A22	0.5	0.397676	3.5	3.3	1.05935	3	3	1.24722	3.15	2.22123	0.759194	1.8622	1.11395	0.676168	0.537927	3.6036
01-01-06-02-02-02-23.mp4	AV	Speech	Fearful	Strong	Dogs	R2	A23	1	0.795352	4	3.8	0.632456	3.5	3.3	1.33749	7.1	2.78388	2.03957	2.53321	1.94388	1.34045	1.05728	3.53688
01-01-06-02-02-02-24.mp4	AV	Speech	Fearful	Strong	Dogs	R2	A24	0.9	0.715817	4	3.6	1.3499	2.5	2.6	1.17379	5.58	3.06981	1.89711	1.82261	1.18237	0.94549	0.375506	3.83717
01-01-07-01-01-01-01.mp4	AV	Speech	Disgust	Normal	Kids	R1	A1	0.8	0.626256	4	3.7	1.41814	4	3.7	1.33749	5.92	1.64887	0.687021	2.43537	1.55063	0.786349	0.659337	3.87052
01-01-07-01-01-01-02.mp4	AV	Speech	Disgust	Normal	Kids	R1	A2	0.8	0.626256	3	3.1	0.875595	3	3.1	1.59513	4.96	2.16919	1.10611	1.79134	1.6956	1.10729	1.25353	3.67033
01-01-07-01-01-01-03.mp4	AV	Speech	Disgust	Normal	Kids	R1	A3	1	0.78282	4	3.9	0.737865	3.5	3.5	1.2693	7.4	2.12509	1.12136	1.7851	1.00888	1.21061	1.16706	4.03737
01-01-07-01-01-01-04.mp4	AV	Speech	Disgust	Normal	Kids	R1	A4	1	0.78282	4.5	4.4	0.699206	4	4	1.05409	8.4	1.9312	0.486529	1.45668	1.29193	0.897903	0.766605	3.90392
01-01-07-01-01-01-05.mp4	AV	Speech	Disgust	Normal	Kids	R1	A5	1	0.78282	4	3.9	0.994429	4	3.9	0.875595	7.8	1.90275	1.37007	2.48666	1.4483	1.1877	0.79582	4.33767
01-01-07-01-01-01-06.mp4	AV	Speech	Disgust	Normal	Kids	R1	A6	1	0.78282	5	4.6	0.699206	4.5	4.5	0.527046	9.1	1.27934	0.577119	1.65514	0.770603	0.770615	0.528317	3.5035
01-01-07-01-01-01-07.mp4	AV	Speech	Disgust	Normal	Kids	R1	A7	0.9	0.704538	4	3.7	0.948683	3	2.9	1.44914	5.94	1.68183	0.873973	2.148	1.41705	1.28778	1.44119	3.53685
01-01-07-01-01-01-08.mp4	AV	Speech	Disgust	Normal	Kids	R1	A8	1	0.78282	3.5	3.5	1.2693	2.5	3	1.41421	6.5	1.85635	1.83317	1.19646	0.736388	1.14247	1.08098	3.9039
01-01-07-01-01-01-09.mp4	AV	Speech	Disgust	Normal	Kids	R1	A9	1	0.78282	3	3.6	1.07497	4	3.8	1.0328	7.4	1.99538	2.14237	1.89751	1.85573	1.04434	0.845834	3.4034
01-01-07-01-01-01-10.mp4	AV	Speech	Disgust	Normal	Kids	R1	A10	0.9	0.704538	4	3.9	0.994429	3.5	3.5	1.08012	6.66	2.42287	1.96752	1.27077	0.879904	1.10684	1.35231	3.70371
01-01-07-01-01-01-11.mp4	AV	Speech	Disgust	Normal	Kids	R1	A11	0.9	0.704538	4	3.6	1.07497	3	3.2	1.31656	6.12	1.86842	0.927403	1.66028	0.991404	0.91897	0.601061	3.67033
01-01-07-01-01-01-12.mp4	AV	Speech	Disgust	Normal	Kids	R1	A12	0.8	0.626256	4	3.7	0.948683	3.5	3.6	1.26491	5.84	1.93608	0.370612	2.18049	1.21544	0.971148	0.540201	3.73706
01-01-07-01-01-01-13.mp4	AV	Speech	Disgust	Normal	Kids	R1	A13	0.8	0.626256	3	3.3	1.1595	4	3.7	1.25167	5.6	2.0087	1.35524	1.25435	0.581013	1.11228	0.668233	3.13646
01-01-07-01-01-01-14.mp4	AV	Speech	Disgust	Normal	Kids	R1	A14	1	0.78282	4	4.2	0.788811	3.5	3.1	1.37032	7.3	2.70006	1.4783	2.44105	1.62159	1.23759	0.914461	3.77042
01-01-07-01-01-01-15.mp4	AV	Speech	Disgust	Normal	Kids	R1	A15	0.6	0.469692	3	3.4	0.516398	4	3.3	1.25167	4.02	2.43843	1.07753	2.06965	1.06096	1.05164	1.05239	3.73706
01-01-07-01-01-01-16.mp4	AV	Speech	Disgust	Normal	Kids	R1	A16	1	0.78282	4	4.1	0.737865	4.5	4.2	1.0328	8.3	2.34741	2.18586	1.92323	1.18427	1.65264	1.2537	3.77044
01-01-07-01-01-01-17.mp4	AV	Speech	Disgust	Normal	Kids	R1	A17	1	0.78282	4	4	0.666667	4	3.8	1.13529	7.8	1.35361	0.652407	2.75583	1.79269	0.986755	0.742096	3.83717
01-01-07-01-01-01-18.mp4	AV	Speech	Disgust	Normal	Kids	R1	A18	1	0.78282	4	4.3	0.483046	4	3.9	1.28668	8.2	2.31462	1.63368	1.75833	0.930849	1.1455	1.09287	4.30431
01-01-07-01-01-01-19.mp4	AV	Speech	Disgust	Normal	Kids	R1	A19	1	0.78282	4	4.3	0.674949	4	3.8	1.22927	8.1	1.79909	0.682045	2.03866	1.51218	0.980362	0.900355	4.30431
01-01-07-01-01-01-20.mp4	AV	Speech	Disgust	Normal	Kids	R1	A20	0.7	0.547974	4	3.8	0.421637	4	3.6	1.17379	5.18	2.97967	1.26285	2.18906	0.97596	1.39553	1.37136	3.87052
01-01-07-01-01-01-21.mp4	AV	Speech	Disgust	Normal	Kids	R1	A21	0.9	0.704538	3.5	3.6	0.966092	3	2.9	0.994429	5.85	2.17087	0.753004	2.04402	1.66372	0.889531	0.707297	3.80379
01-01-07-01-01-01-22.mp4	AV	Speech	Disgust	Normal	Kids	R1	A22	0.8	0.626256	2.5	2.8	0.918937	2.5	2.6	0.966092	4.32	3.40341	2.16209	1.95759	1.43586	1.40706	1.081	3.70369
01-01-07-01-01-01-23.mp4	AV	Speech	Disgust	Normal	Kids	R1	A23	0.8	0.626256	3.5	3.7	0.823273	3.5	3.2	1.0328	5.52	2.10731	2.09292	1.52416	0.990606	0.527253	0.435553	3.57023
01-01-07-01-01-01-24.mp4	AV	Speech	Disgust	Normal	Kids	R1	A24	0.7	0.547974	4	4	0.816497	3.5	3.2	1.47573	5.04	1.49761	0.533953	1.90246	0.947164	1.28601	1.05888	4.30429
01-01-07-01-01-02-01.mp4	AV	Speech	Disgust	Normal	Kids	R2	A1	0.9	0.704538	4	3.9	0.994429	4	4.1	0.737865	7.2	3.38374	2.26362	1.68535	1.26699	0.857213	0.682012	3.9039
01-01-07-01-01-02-02.mp4	AV	Speech	Disgust	Normal	Kids	R2	A2	1	0.78282	3.5	3.8	0.918937	4	4.2	0.918937	8	1.65964	0.512107	1.84943	1.69995	1.01359	0.537405	3.63698
01-01-07-01-01-02-03.mp4	AV	Speech	Disgust	Normal	Kids	R2	A3	0.9	0.704538	4	4.1	0.875595	3	3.2	1.13529	6.57	2.80483	1.59482	1.90869	0.800044	0.99672	0.694314	3.97065
01-01-07-01-01-02-04.mp4	AV	Speech	Disgust	Normal	Kids	R2	A4	1	0.78282	4	3.8	0.788811	4	3.7	0.948683	7.5	1.91851	1.06316	2.57966	1.67393	0.896969	0.806133	3.9039
01-01-07-01-01-02-05.mp4	AV	Speech	Disgust	Normal	Kids	R2	A5	0.9	0.704538	4	3.8	0.788811	3.5	3.7	1.25167	6.75	2.122	0.704898	2.40572	1.47934	1.09004	1.04523	4.1041
01-01-07-01-01-02-06.mp4	AV	Speech	Disgust	Normal	Kids	R2	A6	1	0.78282	4	4.1	0.875595	5	4.2	1.13529	8.3	1.85997	1.12192	1.87149	1.34723	0.943172	0.782021	4.27094
01-01-07-01-01-02-07.mp4	AV	Speech	Disgust	Normal	Kids	R2	A7	1	0.78282	4	3.5	1.08012	3.5	3.6	1.42984	7.1	2.06256	1.1594	1.85926	1.48771	0.805409	0.628417	3.5035
01-01-07-01-01-02-08.mp4	AV	Speech	Disgust	Normal	Kids	R2	A8	0.9	0.704538	5	4.2	1.22927	3	3.1	1.79196	6.57	1.86463	1.01946	1.10948	0.717815	0.529913	0.351583	3.67033
01-01-07-01-01-02-09.mp4	AV	Speech	Disgust	Normal	Kids	R2	A9	0.8	0.626256	4	3.6	0.843274	4	3.8	0.788811	5.92	2.01027	1.90448	1.54499	1.1702	0.650244	0.432087	3.5035
01-01-07-01-01-02-10.mp4	AV	Speech	Disgust	Normal	Kids	R2	A10	0.9	0.704538	4	3.7	0.674949	3	3.6	1.07497	6.57	1.74263	0.751326	1.58441	0.839542	0.734152	0.430621	4.20419
01-01-07-01-01-02-11.mp4	AV	Speech	Disgust	Normal	Kids	R2	A11	1	0.78282	4	4.2	0.632456	4	3.8	1.13529	8	2.08028	0.764148	2.86642	1.57086	0.673263	0.375053	3.6036
01-01-07-01-01-02-12.mp4	AV	Speech	Disgust	Normal	Kids	R2	A12	0.9	0.704538	4	4.2	0.788811	4	4.4	0.516398	7.74	1.84635	0.469578	1.52912	1.43693	0.810925	0.603479	3.70371
01-01-07-01-01-02-13.mp4	AV	Speech	Disgust	Normal	Kids	R2	A13	0.8	0.626256	3	3.3	0.674949	3.5	3.5	0.849837	5.44	2.67366	1.71184	2.05004	1.62975	0.884842	0.465883	3.16983
01-01-07-01-01-02-14.mp4	AV	Speech	Disgust	Normal	Kids	R2	A14	0.9	0.704538	4	3.7	1.1595	2.5	2.9	2.02485	5.94	2.4612	1.52224	2.27363	1.52089	0.650637	0.378015	3.63696
01-01-07-01-01-02-15.mp4	AV	Speech	Disgust	Normal	Kids	R2	A15	0.5	0.39141	3.5	3.5	0.849837	3	2.8	1.0328	3.15	3.06798	1.77929	1.80591	1.06469	1.18288	1.16393	3.63696
01-01-07-01-01-02-16.mp4	AV	Speech	Disgust	Normal	Kids	R2	A16	0.9	0.704538	5	4.6	0.516398	4	3.6	1.3499	7.38	1.64103	0.23153	1.93549	1.41467	1.10313	1.21228	3.73706
01-01-07-01-01-02-17.mp4	AV	Speech	Disgust	Normal	Kids	R2	A17	0.7	0.547974	4	4.2	0.632456	4	3.5	1.08012	5.39	2.16551	2.10548	1.98005	0.760375	0.86581	0.644723	3.70371
01-01-07-01-01-02-18.mp4	AV	Speech	Disgust	Normal	Kids	R2	A18	0.9	0.704538	4	3.9	1.19722	5	4	1.33333	7.11	1.54414	0.427362	2.00562	1.8886	0.730833	0.715649	4.07075
01-01-07-01-01-02-19.mp4	AV	Speech	Disgust	Normal	Kids	R2	A19	1	0.78282	4	4.1	0.737865	4	3.7	1.49443	7.8	1.70772	1.09925	1.61203	0.767786	0.931539	0.717532	4.83817
01-01-07-01-01-02-20.mp4	AV	Speech	Disgust	Normal	Kids	R2	A20	1	0.78282	4	4.1	0.737865	3.5	3.7	1.05935	7.8	1.59146	0.590636	1.74275	1.13161	1.3906	1.27487	3.73706
01-01-07-01-01-02-21.mp4	AV	Speech	Disgust	Normal	Kids	R2	A21	0.9	0.704538	4	3.8	1.22927	3.5	3.1	1.72884	6.21	2.13553	1.49985	1.46213	1.135	0.842867	0.534106	4.07075
01-01-07-01-01-02-22.mp4	AV	Speech	Disgust	Normal	Kids	R2	A22	0.6	0.469692	3	2.9	0.567646	3	2.8	1.0328	3.42	1.84992	1.23735	1.51452	0.970185	1.14218	1.01139	3.9039
01-01-07-01-01-02-23.mp4	AV	Speech	Disgust	Normal	Kids	R2	A23	1	0.78282	3.5	3.2	1.39841	3.5	3.5	1.58114	6.7	3.13928	1.54239	1.94261	1.15119	0.941789	0.578046	3.57023
01-01-07-01-01-02-24.mp4	AV	Speech	Disgust	Normal	Kids	R2	A24	0.9	0.704538	3.5	3.6	1.17379	3	3.2	1.68655	6.12	2.32483	0.902377	2.43026	1.87152	1.15837	1.26438	4.1041
01-01-07-01-02-01-01.mp4	AV	Speech	Disgust	Normal	Dogs	R1	A1	1	0.78282	4	4.1	0.994429	3.5	3.6	1.17379	7.7	1.83774	1.16336	1.71974	1.63629	1.48867	1.24169	3.9039
01-01-07-01-02-01-02.mp4	AV	Speech	Disgust	Normal	Dogs	R1	A2	1	0.78282	4	4.2	0.788811	4	3.8	1.13529	8	1.42256	0.644998	2.02942	1.29266	1.05605	0.751592	3.87054
01-01-07-01-02-01-03.mp4	AV	Speech	Disgust	Normal	Dogs	R1	A3	1	0.78282	5	4.4	0.843274	4	3.6	1.26491	8	1.71912	1.29197	1.44989	1.4774	1.65548	1.06092	3.6036
01-01-07-01-02-01-04.mp4	AV	Speech	Disgust	Normal	Dogs	R1	A4	1	0.78282	4	4.2	0.632456	3	3.1	1.37032	7.3	1.58756	0.481683	2.00432	1.2846	0.727321	0.61142	3.77044
01-01-07-01-02-01-05.mp4	AV	Speech	Disgust	Normal	Dogs	R1	A5	0.9	0.704538	3	3	0.816497	4	3.7	0.948683	6.03	1.81271	0.778685	1.67208	0.816832	0.649323	0.393898	3.9039
01-01-07-01-02-01-06.mp4	AV	Speech	Disgust	Normal	Dogs	R1	A6	1	0.78282	4	4.2	0.788811	4	4.3	0.674949	8.5	2.43312	1.05511	3.33987	2.0087	1.10255	0.738106	3.73706
01-01-07-01-02-01-07.mp4	AV	Speech	Disgust	Normal	Dogs	R1	A7	0.9	0.704538	4	3.6	1.07497	4	3.9	1.1005	6.75	1.87841	1.1482	2.54468	1.97153	1.04998	0.612385	3.43677
01-01-07-01-02-01-08.mp4	AV	Speech	Disgust	Normal	Dogs	R1	A8	1	0.78282	4.5	4.2	0.918937	5	4.3	1.05935	8.5	1.38528	0.618486	1.538	0.77551	0.916395	1.0986	3.93727
01-01-07-01-02-01-09.mp4	AV	Speech	Disgust	Normal	Dogs	R1	A9	0.8	0.626256	4	3.8	1.22927	3.5	3.3	1.56702	5.68	2.19494	1.09035	2.23434	1.61493	1.20495	0.903754	3.47012
01-01-07-01-02-01-10.mp4	AV	Speech	Disgust	Normal	Dogs	R1	A10	0.7	0.547974	4	4.1	0.875595	3.5	3.4	0.966092	5.25	2.13975	1.87995	1.69814	1.3472	0.58911	0.590555	3.87054
01-01-07-01-02-01-11.mp4	AV	Speech	Disgust	Normal	Dogs	R1	A11	1	0.78282	4	4	0.942809	4.5	4.2	1.0328	8.2	1.50258	0.48402	1.72522	1.20857	0.841747	0.892762	3.47012
01-01-07-01-02-01-12.mp4	AV	Speech	Disgust	Normal	Dogs	R1	A12	0.8	0.626256	3	3.1	0.567646	3	3	0.942809	4.88	2.53293	1.81285	2.00442	1.66587	0.969845	0.754017	3.6036
01-01-07-01-02-01-13.mp4	AV	Speech	Disgust	Normal	Dogs	R1	A13	0.9	0.704538	4	3.4	1.17379	4	3.7	0.823273	6.39	1.73713	0.516246	1.13212	0.800657	0.855238	1.14345	3.26994
01-01-07-01-02-01-14.mp4	AV	Speech	Disgust	Normal	Dogs	R1	A14	0.9	0.704538	4.5	4.4	0.699206	4.5	4	1.33333	7.56	2.00508	1.03609	1.66936	1.02403	1.09915	1.11196	3.73706
01-01-07-01-02-01-15.mp4	AV	Speech	Disgust	Normal	Dogs	R1	A15	1	0.78282	4	4	0.942809	4	4.1	0.737865	8.1	1.55968	0.542624	1.7316	1.05989	0.414446	0.130567	3.67033
01-01-07-01-02-01-16.mp4	AV	Speech	Disgust	Normal	Dogs	R1	A16	0.9	0.704538	4	4.4	0.516398	4	3.9	0.994429	7.47	1.49	0.360576	2.13642	1.45194	0.972199	0.840505	3.47012
01-01-07-01-02-01-17.mp4	AV	Speech	Disgust	Normal	Dogs	R1	A17	0.7	0.547974	3	3.2	1.13529	4	3.4	1.26491	4.62	3.10537	1.66946	2.03475	1.74221	0.680241	0.500728	3.57023
01-01-07-01-02-01-18.mp4	AV	Speech	Disgust	Normal	Dogs	R1	A18	1	0.78282	5	4.5	0.707107	4.5	3.9	1.44914	8.4	1.44824	0.558639	2.0045	1.98927	1.10144	1.04826	3.67033
01-01-07-01-02-01-19.mp4	AV	Speech	Disgust	Normal	Dogs	R1	A19	1	0.78282	4	4.2	0.918937	4	3.6	1.3499	7.8	1.99187	0.800421	1.89806	1.54681	1.08888	0.977112	4.17083
01-01-07-01-02-01-20.mp4	AV	Speech	Disgust	Normal	Dogs	R1	A20	0.8	0.626256	4.5	4.2	0.918937	5	4.4	1.26491	6.88	2.58632	1.79904	1.62245	1.14548	0.711216	0.439131	3.63696
01-01-07-01-02-01-21.mp4	AV	Speech	Disgust	Normal	Dogs	R1	A21	0.5	0.39141	4	3.8	0.788811	3.5	3.4	0.966092	3.6	2.21158	1.16489	1.80642	1.24421	0.754185	0.689311	3.63698
01-01-07-01-02-01-22.mp4	AV	Speech	Disgust	Normal	Dogs	R1	A22	1	0.78282	3	3.2	1.31656	3	3	1.24722	6.2	1.55975	0.752037	1.58242	1.69103	1.08484	0.732601	3.80379
01-01-07-01-02-01-23.mp4	AV	Speech	Disgust	Normal	Dogs	R1	A23	0.9	0.704538	3	2.9	0.994429	3	3.3	0.948683	5.58	2.73421	2.14507	2.00567	0.477925	1.34714	1.0245	3.47012
01-01-07-01-02-01-24.mp4	AV	Speech	Disgust	Normal	Dogs	R1	A24	0.9	0.704538	4	3.7	0.674949	4	3.4	1.17379	6.39	1.16165	0.434776	1.60922	1.11772	0.778318	0.464556	4.004
01-01-07-01-02-02-01.mp4	AV	Speech	Disgust	Normal	Dogs	R2	A1	1	0.78282	4	3.5	1.35401	4	3.4	1.57762	6.9	1.68933	0.590668	2.87073	1.4907	0.957128	0.841943	3.83717
01-01-07-01-02-02-02.mp4	AV	Speech	Disgust	Normal	Dogs	R2	A2	1	0.78282	3.5	3.7	0.823273	3.5	3.5	1.17851	7.2	2.26986	0.976777	1.9028	1.54115	1.04036	1.04527	3.83717
01-01-07-01-02-02-03.mp4	AV	Speech	Disgust	Normal	Dogs	R2	A3	1	0.78282	4.5	4.5	0.527046	4	3.7	1.56702	8.2	1.653	1.25491	0.932006	0.440798	0.437326	0.418586	3.77044
01-01-07-01-02-02-04.mp4	AV	Speech	Disgust	Normal	Dogs	R2	A4	1	0.78282	4	3.9	0.737865	4	3.7	0.948683	7.6	2.81142	2.22102	2.17246	1.90224	1.41671	1.10906	3.80381
01-01-07-01-02-02-05.mp4	AV	Speech	Disgust	Normal	Dogs	R2	A5	0.7	0.547974	3	2.9	0.994429	4	3.4	1.17379	4.41	1.78306	0.754422	1.18812	1.23389	1.15774	1.11045	3.73706
01-01-07-01-02-02-06.mp4	AV	Speech	Disgust	Normal	Dogs	R2	A6	1	0.78282	5	4.4	0.843274	4	3.8	1.13529	8.2	2.73116	1.4303	2.44147	1.42992	1.48852	1.32853	3.93727
01-01-07-01-02-02-07.mp4	AV	Speech	Disgust	Normal	Dogs	R2	A7	1	0.78282	4	3.5	0.707107	3	3.2	1.0328	6.7	1.63179	0.571584	1.0921	0.842531	0.805654	0.585557	3.53685
01-01-07-01-02-02-08.mp4	AV	Speech	Disgust	Normal	Dogs	R2	A8	0.9	0.704538	4.5	4.1	1.1005	4	3.9	0.875595	7.2	1.81867	0.756067	1.25929	0.549366	1.12119	0.84165	3.83717
01-01-07-01-02-02-09.mp4	AV	Speech	Disgust	Normal	Dogs	R2	A9	1	0.78282	3	2.9	0.737865	4	3.7	1.1595	6.6	2.76787	1.70942	2.09996	1.2843	0.809299	0.609698	3.4034
01-01-07-01-02-02-10.mp4	AV	Speech	Disgust	Normal	Dogs	R2	A10	0.9	0.704538	4	4.1	0.737865	5	4.2	1.31656	7.47	2.52978	1.54212	1.86787	1.01294	0.84134	0.98509	4.27094
01-01-07-01-02-02-11.mp4	AV	Speech	Disgust	Normal	Dogs	R2	A11	1	0.78282	4	4.1	0.737865	3.5	3.6	0.966092	7.7	2.15727	1.09866	2.43097	1.54514	1.35148	1.06562	3.67033
01-01-07-01-02-02-12.mp4	AV	Speech	Disgust	Normal	Dogs	R2	A12	0.9	0.704538	4	3.9	0.875595	4	4	1.1547	7.11	2.02645	1.11644	1.79313	0.780413	0.887903	1.08944	3.70371
01-01-07-01-02-02-13.mp4	AV	Speech	Disgust	Normal	Dogs	R2	A13	0.6	0.469692	4	3.9	0.994429	3.5	3.4	1.26491	4.38	2.19795	1.23605	1.40082	1.19847	0.40179	0.276819	3.23656
01-01-07-01-02-02-14.mp4	AV	Speech	Disgust	Normal	Dogs	R2	A14	0.6	0.469692	5	4.6	0.516398	4.5	4.2	1.0328	5.28	1.97053	1.16997	2.14071	1.65536	0.646939	0.704181	3.77044
01-01-07-01-02-02-15.mp4	AV	Speech	Disgust	Normal	Dogs	R2	A15	0.8	0.626256	3.5	3.5	1.08012	3.5	3.2	1.22927	5.36	1.64753	0.765649	1.35843	0.594089	1.34781	0.686774	4.07073
01-01-07-01-02-02-16.mp4	AV	Speech	Disgust	Normal	Dogs	R2	A16	1	0.78282	4	4.1	0.875595	4	3.9	0.737865	8	1.71517	0.789528	1.46317	0.713365	0.732897	0.622646	3.57023
01-01-07-01-02-02-17.mp4	AV	Speech	Disgust	Normal	Dogs	R2	A17	0.9	0.704538	4	3.8	0.788811	4	4	0.816497	7.02	1.2156	0.604392	2.14083	1.79186	0.908332	0.699791	3.5035
01-01-07-01-02-02-18.mp4	AV	Speech	Disgust	Normal	Dogs	R2	A18	0.9	0.704538	4	4.2	0.788811	3.5	3.3	1.33749	6.75	2.02292	1.77878	2.42995	1.54251	0.969762	0.67694	4.37104
01-01-07-01-02-02-19.mp4	AV	Speech	Disgust	Normal	Dogs	R2	A19	0.9	0.704538	4	4.3	0.674949	5	4.4	0.966092	7.83	1.37607	0.780082	1.21262	0.88731	0.496493	0.527944	3.93727
01-01-07-01-02-02-20.mp4	AV	Speech	Disgust	Normal	Dogs	R2	A20	1	0.78282	4	3.5	0.707107	3.5	3.3	1.1595	6.8	1.97962	0.733193	2.07194	0.910489	1.05935	0.847413	3.83717
01-01-07-01-02-02-21.mp4	AV	Speech	Disgust	Normal	Dogs	R2	A21	0.7	0.547974	4	3.9	0.737865	4	3.6	0.699206	5.25	2.58318	2.04399	2.3731	1.64191	1.06688	0.526132	3.6036
01-01-07-01-02-02-22.mp4	AV	Speech	Disgust	Normal	Dogs	R2	A22	0.9	0.704538	3	2.7	0.674949	3	3	1.05409	5.13	1.73422	0.83496	2.16382	1.56565	1.10449	0.484914	3.83717
01-01-07-01-02-02-23.mp4	AV	Speech	Disgust	Normal	Dogs	R2	A23	0.9	0.704538	3	3.4	1.07497	3.5	3.4	1.17379	6.12	1.88545	1.50134	1.7517	1.25629	0.935596	0.885393	3.33667
01-01-07-01-02-02-24.mp4	AV	Speech	Disgust	Normal	Dogs	R2	A24	0.9	0.704538	3	3.5	0.707107	3	3.3	0.948683	6.12	2.24634	1.3344	1.59718	1.42424	1.1551	1.10974	4.07073
01-01-07-02-01-01-01.mp4	AV	Speech	Disgust	Strong	Kids	R1	A1	0.7	0.547974	4	4.3	0.674949	3.5	3.8	1.13529	5.67	1.72632	1.52499	1.86981	1.75937	1.0328	1.39601	4.30429
01-01-07-02-01-01-02.mp4	AV	Speech	Disgust	Strong	Kids	R1	A2	1	0.78282	4.5	4.2	1.0328	4	3.9	1.19722	8.1	2.31215	1.43922	1.35971	0.814286	0.527254	0.257408	4.13746
01-01-07-02-01-01-03.mp4	AV	Speech	Disgust	Strong	Kids	R1	A3	1	0.78282	5	4.5	0.707107	4	3.3	1.88856	7.8	1.58557	0.566401	1.6958	1.23481	1.00359	0.906354	4.1041
01-01-07-02-01-01-04.mp4	AV	Speech	Disgust	Strong	Kids	R1	A4	0.9	0.704538	4.5	4.2	0.918937	4	4	1.24722	7.38	2.41497	1.92929	1.76419	1.10686	1.27331	1.09167	4.004
01-01-07-02-01-01-05.mp4	AV	Speech	Disgust	Strong	Kids	R1	A5	0.8	0.626256	4.5	4.5	0.527046	4	3.7	1.1595	6.56	2.22216	1.15028	2.35381	1.78137	0.845575	0.710025	4.33767
01-01-07-02-01-01-06.mp4	AV	Speech	Disgust	Strong	Kids	R1	A6	0.8	0.626256	5	4.5	0.707107	4	3.2	1.75119	6.16	2.30877	2.13755	1.3006	0.649775	0.422511	0.212655	4.30431
01-01-07-02-01-01-07.mp4	AV	Speech	Disgust	Strong	Kids	R1	A7	0.9	0.704538	5	4.9	0.316228	4.5	3.8	1.54919	7.83	2.54642	1.12708	1.80329	1.61081	0.560413	0.472075	4.13748
01-01-07-02-01-01-08.mp4	AV	Speech	Disgust	Strong	Kids	R1	A8	1	0.78282	4.5	4.3	0.823273	4.5	4.2	1.22927	8.5	1.7857	0.748647	1.75763	1.4265	0.654597	0.80482	4.07073
01-01-07-02-01-01-09.mp4	AV	Speech	Disgust	Strong	Kids	R1	A9	0.3	0.234846	4	3.8	1.0328	4	3.9	1.37032	2.31	1.99609	0.928665	1.60052	0.891453	1.18406	1.25001	3.63698
01-01-07-02-01-01-10.mp4	AV	Speech	Disgust	Strong	Kids	R1	A10	1	0.78282	4.5	4.1	0.994429	4.5	4.3	0.948683	8.4	2.03207	1.96744	1.25796	0.674269	0.502593	0.346967	4.67133
01-01-07-02-01-01-11.mp4	AV	Speech	Disgust	Strong	Kids	R1	A11	1	0.78282	4.5	4.3	0.823273	4	4	0.666667	8.3	1.83429	0.916884	2.26416	1.73667	1.19694	0.695453	3.80381
01-01-07-02-01-01-12.mp4	AV	Speech	Disgust	Strong	Kids	R1	A12	1	0.78282	4	4.4	0.516398	3	3.1	0.875595	7.5	1.70266	0.475974	1.57192	0.763418	1.13348	1.28293	3.97065
01-01-07-02-01-01-13.mp4	AV	Speech	Disgust	Strong	Kids	R1	A13	0.9	0.704538	3	3	0.816497	4	3.5	0.971825	5.85	2.13694	0.793017	2.03532	1.96196	0.970344	0.637704	3.4034
01-01-07-02-01-01-14.mp4	AV	Speech	Disgust	Strong	Kids	R1	A14	0.5	0.39141	4	4.2	0.788811	3	2.8	1.0328	3.5	2.51704	1.64401	2.20243	1.22738	1.29126	0.902863	3.93725
01-01-07-02-01-01-15.mp4	AV	Speech	Disgust	Strong	Kids	R1	A15	0.4	0.313128	3.5	3.4	0.966092	4	3.9	0.875595	2.92	2.23848	1.44279	1.70522	0.994575	1.24932	0.79194	3.70369
01-01-07-02-01-01-16.mp4	AV	Speech	Disgust	Strong	Kids	R1	A16	1	0.78282	4	4.1	0.567646	3.5	3.4	1.26491	7.5	2.17125	1.21118	2.29354	1.58471	1.35832	1.35027	4.27092
01-01-07-02-01-01-17.mp4	AV	Speech	Disgust	Strong	Kids	R1	A17	1	0.78282	4	4.3	0.674949	4	4	1.05409	8.3	1.70114	0.700727	2.5124	2.02386	1.1488	1.04505	4.20421
01-01-07-02-01-01-18.mp4	AV	Speech	Disgust	Strong	Kids	R1	A18	0.9	0.704538	4.5	4.2	1.22927	3	3	1.56347	6.48	2.01712	0.86604	1.4445	0.975355	0.805989	0.601536	4.77142
01-01-07-02-01-01-19.mp4	AV	Speech	Disgust	Strong	Kids	R1	A19	0.9	0.704538	5	4.5	1.2693	5	3.9	1.52388	7.56	1.76219	1.0869	1.46106	1.21577	0.874676	0.907368	4.80481
01-01-07-02-01-01-20.mp4	AV	Speech	Disgust	Strong	Kids	R1	A20	0.9	0.704538	4	4	0.471405	3	3.2	1.39841	6.48	1.67936	0.342594	1.92657	0.920692	1.3139	1.24308	4.1041
01-01-07-02-01-01-21.mp4	AV	Speech	Disgust	Strong	Kids	R1	A21	0.7	0.547974	3.5	3.5	1.08012	2	2.7	1.63639	4.34	1.99891	0.561267	2.18842	1.00249	1.22666	1.31183	4.07073
01-01-07-02-01-01-22.mp4	AV	Speech	Disgust	Strong	Kids	R1	A22	0.9	0.704538	3	3.3	1.25167	3.5	3.3	1.56702	5.94	2.02554	1.9031	0.846847	0.511065	0.701089	0.951306	4.23756
01-01-07-02-01-01-23.mp4	AV	Speech	Disgust	Strong	Kids	R1	A23	0.9	0.704538	4	4.2	0.632456	4	3.6	1.57762	7.02	1.77121	0.712161	1.3554	0.649877	0.9482	1.11324	4.07073
01-01-07-02-01-01-24.mp4	AV	Speech	Disgust	Strong	Kids	R1	A24	0.6	0.469692	3	2.8	1.22927	1.5	2.2	1.39841	3	3.39913	2.43827	1.646	0.712483	0.796503	1.00138	4.33767
01-01-07-02-01-02-01.mp4	AV	Speech	Disgust	Strong	Kids	R2	A1	0.7	0.547974	4	4	0.816497	4	3.5	1.17851	5.25	2.36132	1.51382	1.214	0.457837	0.624969	0.408912	4.1041
01-01-07-02-01-02-02.mp4	AV	Speech	Disgust	Strong	Kids	R2	A2	0.9	0.704538	4.5	4.2	0.918937	4	3.9	1.28668	7.29	2.38168	1.83562	1.84429	1.06912	0.833028	0.951428	4.13746
01-01-07-02-01-02-03.mp4	AV	Speech	Disgust	Strong	Kids	R2	A3	1	0.78282	5	4.7	0.483046	3	3	1.05409	7.7	1.57493	0.665192	1.45946	0.922323	0.73966	0.48663	4.1041
01-01-07-02-01-02-04.mp4	AV	Speech	Disgust	Strong	Kids	R2	A4	0.9	0.704538	4.5	4.3	0.948683	3.5	3.4	1.42984	6.93	1.23861	0.358619	1.38851	1.2243	0.483652	0.448004	4.03737
01-01-07-02-01-02-05.mp4	AV	Speech	Disgust	Strong	Kids	R2	A5	1	0.78282	4.5	4.5	0.527046	3	3.4	1.3499	7.9	2.61931	1.77686	2.24281	1.6398	1.12568	0.872298	3.9039
01-01-07-02-01-02-06.mp4	AV	Speech	Disgust	Strong	Kids	R2	A6	0.9	0.704538	4	4.3	0.483046	4	4.1	0.737865	7.56	2.48534	1.25565	2.04663	1.0067	1.09608	0.904477	3.93727
01-01-07-02-01-02-07.mp4	AV	Speech	Disgust	Strong	Kids	R2	A7	0.9	0.704538	4.5	4.3	0.948683	5	4.5	0.707107	7.92	1.29931	0.530974	1.16891	0.904408	0.378608	0.249777	4.4044
01-01-07-02-01-02-08.mp4	AV	Speech	Disgust	Strong	Kids	R2	A8	1	0.78282	4	3.9	1.1005	4	3.8	1.31656	7.7	2.07119	1.60498	2.98023	1.50536	1.11439	0.881622	3.77044
01-01-07-02-01-02-09.mp4	AV	Speech	Disgust	Strong	Kids	R2	A9	0.8	0.626256	4	3.9	0.737865	4	3.6	1.07497	6	3.3104	2.33878	2.32882	1.01541	1.5816	0.98345	3.53685
01-01-07-02-01-02-10.mp4	AV	Speech	Disgust	Strong	Kids	R2	A10	0.9	0.704538	4	3.9	1.37032	2.5	2.8	1.47573	6.03	2.36992	1.66579	2.23779	1.53378	1.35284	1.04329	4.53787
01-01-07-02-01-02-11.mp4	AV	Speech	Disgust	Strong	Kids	R2	A11	1	0.78282	4	3.8	1.22927	4	3.7	1.25167	7.5	1.75429	0.971064	1.62487	1.22249	0.64418	0.574088	3.80381
01-01-07-02-01-02-12.mp4	AV	Speech	Disgust	Strong	Kids	R2	A12	1	0.78282	4	4.1	0.737865	3	2.9	1.37032	7	1.98716	1.30183	1.43452	0.60597	0.860422	1.0835	4.53785
01-01-07-02-01-02-13.mp4	AV	Speech	Disgust	Strong	Kids	R2	A13	0.5	0.39141	3.5	3.4	0.699206	3	3.4	0.843274	3.4	3.06461	2.08532	1.83415	0.939393	0.74001	0.346351	3.70371
01-01-07-02-01-02-14.mp4	AV	Speech	Disgust	Strong	Kids	R2	A14	0.4	0.313128	4	3.8	0.632456	3	2.9	1.19722	2.68	2.40709	0.754332	2.29586	1.61974	1.15985	0.90092	3.73706
01-01-07-02-01-02-15.mp4	AV	Speech	Disgust	Strong	Kids	R2	A15	0.9	0.704538	4	4.1	0.737865	4	4	0.942809	7.29	2.57539	2.45917	1.36685	0.774799	1.06221	0.750705	3.37004
01-01-07-02-01-02-16.mp4	AV	Speech	Disgust	Strong	Kids	R2	A16	1	0.78282	5	4.6	0.516398	4.5	4	1.33333	8.6	1.6585	0.419431	2.57298	2.01643	0.991925	0.58205	4.23758
01-01-07-02-01-02-17.mp4	AV	Speech	Disgust	Strong	Kids	R2	A17	1	0.78282	5	4.4	0.843274	4	3.5	1.71594	7.9	1.24315	0.491763	1.22159	0.823589	0.741598	0.390884	4.17083
01-01-07-02-01-02-18.mp4	AV	Speech	Disgust	Strong	Kids	R2	A18	1	0.78282	5	4.3	1.25167	2	2.2	1.31656	6.5	2.24668	1.40898	2.06046	1.39707	1.34593	0.823215	4.47115
01-01-07-02-01-02-19.mp4	AV	Speech	Disgust	Strong	Kids	R2	A19	0.9	0.704538	5	4.6	0.699206	4	3.9	1.28668	7.65	2.3595	1.13645	1.60624	0.688218	1.15873	0.748152	5.27194
01-01-07-02-01-02-20.mp4	AV	Speech	Disgust	Strong	Kids	R2	A20	0.9	0.704538	5	4.4	1.07497	4.5	4.1	1.19722	7.65	1.97736	0.396573	1.91567	1.16612	1.0015	0.967918	4.10408
01-01-07-02-01-02-21.mp4	AV	Speech	Disgust	Strong	Kids	R2	A21	0.7	0.547974	4	3.9	1.1005	3.5	3	1.24722	4.83	1.91573	1.10293	2.10653	1.53836	1.25233	1.13179	4.03735
01-01-07-02-01-02-22.mp4	AV	Speech	Disgust	Strong	Kids	R2	A22	0.8	0.626256	4	3.5	1.08012	3	3.4	1.07497	5.52	2.49947	2.08266	1.35473	0.40085	0.464966	0.586833	4.17083
01-01-07-02-01-02-23.mp4	AV	Speech	Disgust	Strong	Kids	R2	A23	0.9	0.704538	4	3.9	0.994429	2.5	2.6	1.17379	5.85	1.6758	0.383685	1.22015	0.699385	0.712561	0.492011	3.87052
01-01-07-02-01-02-24.mp4	AV	Speech	Disgust	Strong	Kids	R2	A24	1	0.78282	4	4	1.1547	2.5	3	1.41421	7	2.74009	2.106	1.44867	0.799615	1.16133	0.769726	4.63796
01-01-07-02-02-01-01.mp4	AV	Speech	Disgust	Strong	Dogs	R1	A1	1	0.78282	4	4.3	0.674949	4	3.8	0.918937	8.1	1.97869	1.65438	2.08053	0.94834	0.946796	0.885676	4.03737
01-01-07-02-02-01-02.mp4	AV	Speech	Disgust	Strong	Dogs	R1	A2	1	0.78282	5	4.5	0.849837	4	3.5	1.08012	8	1.52096	0.351877	1.40075	0.808488	0.78115	0.687845	4.004
01-01-07-02-02-01-03.mp4	AV	Speech	Disgust	Strong	Dogs	R1	A3	0.9	0.704538	5	4.6	1.26491	5	4	1.63299	7.74	1.65518	0.603734	2.19617	1.80214	0.85375	1.1791	3.83717
01-01-07-02-02-01-04.mp4	AV	Speech	Disgust	Strong	Dogs	R1	A4	0.9	0.704538	4	4.2	0.788811	4.5	4	1.41421	7.38	1.8953	1.03858	2.14728	1.47992	0.682114	0.548536	3.87054
01-01-07-02-02-01-05.mp4	AV	Speech	Disgust	Strong	Dogs	R1	A5	0.9	0.704538	4.5	4.3	0.823273	4	3.5	1.43372	7.02	2.07519	0.706685	2.32031	1.87703	1.23369	0.910577	4.27094
01-01-07-02-02-01-06.mp4	AV	Speech	Disgust	Strong	Dogs	R1	A6	1	0.78282	5	4.4	0.843274	4	3.5	1.35401	7.9	1.67685	1.24112	1.21394	0.704407	0.673225	0.562589	4.03735
01-01-07-02-02-01-07.mp4	AV	Speech	Disgust	Strong	Dogs	R1	A7	0.9	0.704538	5	4.7	0.674949	5	4.3	1.25167	8.1	1.74103	0.767462	1.56387	1.97064	0.560927	0.492485	4.13746
01-01-07-02-02-01-08.mp4	AV	Speech	Disgust	Strong	Dogs	R1	A8	1	0.78282	5	4.1	1.52388	5	4.6	0.699206	8.7	1.94976	0.992411	2.226	1.44886	1.99759	1.29561	3.73708
01-01-07-02-02-01-09.mp4	AV	Speech	Disgust	Strong	Dogs	R1	A9	0.8	0.626256	4	4.3	0.674949	3	2.9	1.59513	5.76	1.81631	0.762114	1.77117	1.41299	1.10311	0.795358	3.57023
01-01-07-02-02-01-10.mp4	AV	Speech	Disgust	Strong	Dogs	R1	A10	1	0.78282	4	4.4	0.516398	4	3.9	1.19722	8.3	2.11344	0.954231	1.81092	1.88795	0.710782	0.420226	4.20419
01-01-07-02-02-01-11.mp4	AV	Speech	Disgust	Strong	Dogs	R1	A11	0.7	0.547974	4	3.7	0.948683	4	3.8	0.918937	5.25	2.83135	1.6549	2.44649	1.95814	1.22639	0.911595	3.73706
01-01-07-02-02-01-12.mp4	AV	Speech	Disgust	Strong	Dogs	R1	A12	0.9	0.704538	4	4.4	0.516398	3	3.1	1.19722	6.75	1.47303	0.572439	2.03151	1.2208	0.975707	0.592145	4.20421
01-01-07-02-02-01-13.mp4	AV	Speech	Disgust	Strong	Dogs	R1	A13	0.9	0.704538	3	3.3	0.823273	4	3.9	0.567646	6.48	1.96332	1.08206	2.18784	2.41653	0.869567	0.610193	3.4034
01-01-07-02-02-01-14.mp4	AV	Speech	Disgust	Strong	Dogs	R1	A14	0.9	0.704538	3	3.1	1.28668	2	2.4	1.57762	4.95	1.616	0.542892	1.79955	0.797313	0.794997	0.446378	3.67033
01-01-07-02-02-01-15.mp4	AV	Speech	Disgust	Strong	Dogs	R1	A15	0.7	0.547974	3.5	3.2	1.22927	4	3.4	1.17379	4.62	2.82193	1.44138	1.93584	1.65542	1.30079	0.813105	3.30331
01-01-07-02-02-01-16.mp4	AV	Speech	Disgust	Strong	Dogs	R1	A16	1	0.78282	5	4.6	0.516398	5	4.3	0.948683	8.9	1.59179	0.43302	1.75106	1.22474	0.806627	0.678851	4.13746
01-01-07-02-02-01-17.mp4	AV	Speech	Disgust	Strong	Dogs	R1	A17	0.9	0.704538	5	4.8	0.421637	4	3.6	1.3499	7.56	2.60775	1.86835	1.2398	0.67573	0.976054	0.964852	4.47115
01-01-07-02-02-01-18.mp4	AV	Speech	Disgust	Strong	Dogs	R1	A18	1	0.78282	5	4.7	0.674949	4.5	3.7	1.63639	8.4	2.01602	1.39685	1.31621	0.66235	1.11666	1.34974	4.63796
01-01-07-02-02-01-19.mp4	AV	Speech	Disgust	Strong	Dogs	R1	A19	0.9	0.704538	5	4.8	0.421637	4	4	0.942809	7.92	2.22306	0.909907	2.2537	2.09069	0.621881	0.403676	4.9049
01-01-07-02-02-01-20.mp4	AV	Speech	Disgust	Strong	Dogs	R1	A20	0.8	0.626256	5	4.5	0.707107	5	4.4	0.843274	7.12	2.12748	1.56419	1.28056	0.421869	0.693175	0.363478	4.73806
01-01-07-02-02-01-21.mp4	AV	Speech	Disgust	Strong	Dogs	R1	A21	1	0.78282	4	4	1.05409	3	3.1	1.66333	7.1	2.06494	0.946114	1.96406	1.40808	0.931991	0.806247	4.17083
01-01-07-02-02-01-22.mp4	AV	Speech	Disgust	Strong	Dogs	R1	A22	0.9	0.704538	3	3.5	0.707107	3.5	3.3	1.1595	6.12	2.57904	2.37312	2.14357	1.16524	1.04667	1.06501	4.20421
01-01-07-02-02-01-23.mp4	AV	Speech	Disgust	Strong	Dogs	R1	A23	1	0.78282	4	4	0.471405	3	3.2	1.0328	7.2	2.0201	1.26287	2.14425	1.56049	1.47256	0.848242	3.73706
01-01-07-02-02-01-24.mp4	AV	Speech	Disgust	Strong	Dogs	R1	A24	1	0.78282	3	3.2	0.788811	2	2.3	1.05935	5.5	2.53763	1.26934	2.03311	1.92521	1.04343	0.555499	4.23756
01-01-07-02-02-02-01.mp4	AV	Speech	Disgust	Strong	Dogs	R2	A1	0.9	0.704538	4	4.1	0.875595	4	4.3	0.674949	7.56	2.01656	1.31363	1.68523	0.539605	0.70365	0.711146	4.37102
01-01-07-02-02-02-02.mp4	AV	Speech	Disgust	Strong	Dogs	R2	A2	1	0.78282	4	4	0.942809	4	3.7	0.483046	7.7	1.44859	0.525737	1.79985	1.44619	1.2215	0.913697	4.03737
01-01-07-02-02-02-03.mp4	AV	Speech	Disgust	Strong	Dogs	R2	A3	0.9	0.704538	5	4.7	0.483046	4.5	3.7	1.63639	7.56	1.57255	1.01704	1.15781	0.547864	0.521101	0.301836	3.93727
01-01-07-02-02-02-04.mp4	AV	Speech	Disgust	Strong	Dogs	R2	A4	1	0.78282	4.5	4.1	1.19722	3.5	3.4	1.17379	7.5	1.96028	0.700774	1.87047	1.08753	1.2958	1.07251	3.93727
01-01-07-02-02-02-05.mp4	AV	Speech	Disgust	Strong	Dogs	R2	A5	1	0.78282	5	4.9	0.316228	5	4.1	1.44914	9	1.65259	0.721941	1.25957	0.559218	0.810112	0.56173	4.53787
01-01-07-02-02-02-06.mp4	AV	Speech	Disgust	Strong	Dogs	R2	A6	1	0.78282	4.5	4.3	0.823273	4	4	1.05409	8.3	1.97194	0.907483	1.47909	1.16594	1.02244	1.02122	3.97063
01-01-07-02-02-02-07.mp4	AV	Speech	Disgust	Strong	Dogs	R2	A7	1	0.78282	4.5	4.4	0.699206	4.5	4.2	1.0328	8.6	1.64039	0.69729	2.32356	1.43023	1.41376	1.23104	4.77142
01-01-07-02-02-02-08.mp4	AV	Speech	Disgust	Strong	Dogs	R2	A8	1	0.78282	4.5	4.5	0.527046	4	3.7	1.25167	8.2	1.62413	0.741403	1.67846	1.28215	0.756809	0.649816	3.87052
01-01-07-02-02-02-09.mp4	AV	Speech	Disgust	Strong	Dogs	R2	A9	0.6	0.469692	4	4	0.666667	3	3.1	1.44914	4.26	2.12532	1.26477	1.56105	0.965996	1.00888	0.739576	3.60358
01-01-07-02-02-02-10.mp4	AV	Speech	Disgust	Strong	Dogs	R2	A10	0.6	0.469692	4.5	4.3	0.948683	3.5	3.5	1.35401	4.68	3.28313	1.74506	2.01015	1.78593	0.546011	0.407291	4.87154
01-01-07-02-02-02-11.mp4	AV	Speech	Disgust	Strong	Dogs	R2	A11	0.9	0.704538	4.5	4.1	1.19722	4	3.6	1.3499	6.93	1.7045	0.738098	1.86058	1.0356	0.853373	0.673734	3.73706
01-01-07-02-02-02-12.mp4	AV	Speech	Disgust	Strong	Dogs	R2	A12	1	0.78282	4	3.9	0.875595	3	3.1	1.28668	7	1.66391	0.718042	1.57171	1.22833	1.1686	0.886832	3.97065
01-01-07-02-02-02-13.mp4	AV	Speech	Disgust	Strong	Dogs	R2	A13	0.9	0.704538	3	3.2	0.918937	3	3.3	0.948683	5.85	1.37179	1.29942	1.8139	1.70545	0.845579	0.816159	3.43677
01-01-07-02-02-02-14.mp4	AV	Speech	Disgust	Strong	Dogs	R2	A14	0.9	0.704538	4	3.9	1.28668	2	2.8	1.54919	6.03	1.58209	0.63883	2.38011	1.87692	0.848836	0.62006	3.80379
01-01-07-02-02-02-15.mp4	AV	Speech	Disgust	Strong	Dogs	R2	A15	0.8	0.626256	4	3.8	0.918937	2.5	2.7	1.33749	5.2	1.62821	1.10544	1.78329	1.04377	0.840232	0.981948	3.47015
01-01-07-02-02-02-16.mp4	AV	Speech	Disgust	Strong	Dogs	R2	A16	0.9	0.704538	4.5	4.3	0.823273	4	3.5	1.58114	7.02	1.80298	1.33203	1.96237	1.71416	1.14123	0.897381	4.13748
01-01-07-02-02-02-17.mp4	AV	Speech	Disgust	Strong	Dogs	R2	A17	1	0.78282	4.5	4.5	0.527046	3.5	3.2	1.61933	7.7	1.22279	0.627216	2.69806	1.63401	0.511412	0.333631	4.6046
01-01-07-02-02-02-18.mp4	AV	Speech	Disgust	Strong	Dogs	R2	A18	0.9	0.704538	5	5	0	4.5	4.3	0.823273	8.37	2.08648	1.63326	1.51586	1.4253	0.835462	0.598016	4.57123
01-01-07-02-02-02-19.mp4	AV	Speech	Disgust	Strong	Dogs	R2	A19	0.9	0.704538	5	4.6	0.516398	3	3	1.69967	6.84	2.30005	0.881281	1.54704	0.890759	0.914567	0.66746	4.93827
01-01-07-02-02-02-20.mp4	AV	Speech	Disgust	Strong	Dogs	R2	A20	0.9	0.704538	4	3.9	0.875595	4	4.1	0.875595	7.2	1.87199	0.877683	1.25781	0.557115	0.84672	0.650705	3.87052
01-01-07-02-02-02-21.mp4	AV	Speech	Disgust	Strong	Dogs	R2	A21	0.9	0.704538	3.5	3.3	1.56702	2.5	2.8	1.68655	5.49	1.79994	0.798443	1.25733	0.614535	0.609492	0.719472	3.97063
01-01-07-02-02-02-22.mp4	AV	Speech	Disgust	Strong	Dogs	R2	A22	1	0.78282	3.5	3.2	1.39841	3	3.1	1.37032	6.3	1.25548	0.497909	1.79796	1.35679	0.775144	0.539486	4.10408
01-01-07-02-02-02-23.mp4	AV	Speech	Disgust	Strong	Dogs	R2	A23	0.9	0.704538	4	3.7	1.1595	3	3.3	0.674949	6.3	1.63812	0.582443	2.06651	1.32795	1.37998	1.03771	3.87052
01-01-07-02-02-02-24.mp4	AV	Speech	Disgust	Strong	Dogs	R2	A24	1	0.78282	4	4.1	0.994429	4	3.8	1.0328	7.9	1.80745	0.723088	2.11531	1.63827	0.821913	0.593434	4.43777
01-01-08-01-01-01-01.mp4	AV	Speech	Surprise	Normal	Kids	R1	A1	0.5	0.382791	2	2.2	1.13529	3	3	1.33333	2.6	1.59764	0.974905	1.43594	1.13114	1.16216	0.887212	3.4034
01-01-08-01-01-01-02.mp4	AV	Speech	Surprise	Normal	Kids	R1	A2	0.9	0.689024	4	4	0.666667	4	3.8	0.788811	7.02	1.51715	1.34845	2.26577	1.39558	0.856237	0.583393	3.53685
01-01-08-01-01-01-03.mp4	AV	Speech	Surprise	Normal	Kids	R1	A3	0.2	0.153116	3	2.7	0.823273	3	2.5	1.17851	1.04	3.87186	1.78229	1.57711	0.904057	1.46977	1.26119	3.23656
01-01-08-01-01-01-04.mp4	AV	Speech	Surprise	Normal	Kids	R1	A4	1	0.765582	3	3.4	1.07497	4	3.5	1.50923	6.9	2.33483	1.20572	2.71022	1.24296	0.948969	0.478316	3.23658
01-01-08-01-01-01-05.mp4	AV	Speech	Surprise	Normal	Kids	R1	A5	0.8	0.612466	4	4	0.942809	3.5	3.3	1.33749	5.84	1.41255	0.560077	1.42846	0.653649	0.657571	0.462594	3.73706
01-01-08-01-01-01-06.mp4	AV	Speech	Surprise	Normal	Kids	R1	A6	1	0.765582	3.5	3.7	0.823273	4	3.9	1.19722	7.6	1.6379	0.782868	1.73238	1.12091	0.918574	1.01822	3.23656
01-01-08-01-01-01-07.mp4	AV	Speech	Surprise	Normal	Kids	R1	A7	0.8	0.612466	3	3.1	1.1005	4	3.6	1.07497	5.36	1.64071	0.997089	1.70524	1.20653	0.794259	0.672403	3.47012
01-01-08-01-01-01-08.mp4	AV	Speech	Surprise	Normal	Kids	R1	A8	0.9	0.689024	4	3.8	1.0328	3	3.1	1.28668	6.21	2.24185	1.43967	2.18753	1.86226	1.41321	1.38962	3.70371
01-01-08-01-01-01-09.mp4	AV	Speech	Surprise	Normal	Kids	R1	A9	0.8	0.612466	3.5	3.6	1.26491	4	4	0.816497	6.08	2.06656	0.942722	2.08783	1.84608	0.658017	0.430015	3.06973
01-01-08-01-01-01-10.mp4	AV	Speech	Surprise	Normal	Kids	R1	A10	1	0.765582	4	3.8	0.632456	4	3.9	1.19722	7.7	1.41944	0.758271	1.79746	1.20696	1.55114	0.991343	3.23656
01-01-08-01-01-01-11.mp4	AV	Speech	Surprise	Normal	Kids	R1	A11	0.9	0.689024	3	3.1	0.994429	4	3.6	0.843274	6.03	1.72248	0.661313	2.20165	1.68612	1.24253	0.83784	3.06973
01-01-08-01-01-01-12.mp4	AV	Speech	Surprise	Normal	Kids	R1	A12	1	0.765582	3.5	3.6	0.966092	3	3.4	1.3499	7	1.51793	0.916651	1.30495	0.883821	0.7486	0.419844	3.53688
01-01-08-01-01-01-13.mp4	AV	Speech	Surprise	Normal	Kids	R1	A13	0.7	0.535907	3	3.4	0.843274	4	3.6	1.17379	4.9	2.10154	1.93198	1.8817	1.69391	0.849191	0.756339	3.4034
01-01-08-01-01-01-14.mp4	AV	Speech	Surprise	Normal	Kids	R1	A14	1	0.765582	3	2.6	0.843274	4	3.4	1.17379	6	2.39372	2.3466	1.84503	1.26084	0.752033	0.793467	3.63698
01-01-08-01-01-01-15.mp4	AV	Speech	Surprise	Normal	Kids	R1	A15	0.3	0.229675	2	2.4	1.3499	3	2.8	1.22927	1.56	2.2661	1.23062	1.87826	0.978025	1.10554	0.792211	3.63698
01-01-08-01-01-01-16.mp4	AV	Speech	Surprise	Normal	Kids	R1	A16	0.5	0.382791	2.5	2.7	1.25167	4	3.7	0.948683	3.2	2.85724	1.14837	1.34983	0.857726	1.51043	0.894671	3.53688
01-01-08-01-01-01-17.mp4	AV	Speech	Surprise	Normal	Kids	R1	A17	0.7	0.535907	3.5	3.7	0.823273	3	3	1.05409	4.69	2.83869	1.8658	2.80897	1.69826	1.49421	0.982989	3.4034
01-01-08-01-01-01-18.mp4	AV	Speech	Surprise	Normal	Kids	R1	A18	0.7	0.535907	4	3.8	1.13529	3	3.1	1.19722	4.83	2.75253	1.52756	2.06463	1.03915	1.01137	0.619657	3.37002
01-01-08-01-01-01-19.mp4	AV	Speech	Surprise	Normal	Kids	R1	A19	0.8	0.612466	3	3.2	0.632456	4.5	4.4	0.699206	6.08	2.06042	1.17286	1.7641	1.02301	1.28901	0.739494	3.73706
01-01-08-01-01-01-20.mp4	AV	Speech	Surprise	Normal	Kids	R1	A20	0.9	0.689024	4	3.7	0.948683	4	3.8	1.39841	6.75	2.56273	1.97855	1.77311	0.855218	1.34709	1.08208	3.23658
01-01-08-01-01-01-21.mp4	AV	Speech	Surprise	Normal	Kids	R1	A21	0.7	0.535907	2.5	2.9	1.72884	3	3.1	1.66333	4.2	2.64408	1.48615	1.5713	0.998283	0.659842	0.48104	3.5035
01-01-08-01-01-01-22.mp4	AV	Speech	Surprise	Normal	Kids	R1	A22	0.9	0.689024	3	3.2	1.13529	3	3.2	1.13529	5.76	1.87549	0.953882	1.63466	1.76762	0.834051	0.862322	3.53688
01-01-08-01-01-01-23.mp4	AV	Speech	Surprise	Normal	Kids	R1	A23	0.4	0.306233	4	3.4	1.17379	4	3.8	1.31656	2.88	2.94556	1.71335	1.67692	1.13155	0.955687	0.677891	3.26994
01-01-08-01-01-01-24.mp4	AV	Speech	Surprise	Normal	Kids	R1	A24	0.8	0.612466	3.5	3.4	1.07497	3.5	3.4	1.07497	5.44	2.7897	0.748784	2.4326	1.57648	1.43942	1.0016	3.30331
01-01-08-01-01-02-01.mp4	AV	Speech	Surprise	Normal	Kids	R2	A1	0.7	0.535907	2.5	2.5	0.527046	4	4.1	0.994429	4.62	2.14332	1.10047	3.08732	1.55187	1.5911	1.06607	3.26992
01-01-08-01-01-02-02.mp4	AV	Speech	Surprise	Normal	Kids	R2	A2	1	0.765582	4	4.2	0.788811	4	3.8	1.39841	8	2.03358	1.23572	2.38275	2.0749	0.762975	0.523033	3.53685
01-01-08-01-01-02-03.mp4	AV	Speech	Surprise	Normal	Kids	R2	A3	0.6	0.459349	3.5	3.7	1.05935	4	3.6	1.07497	4.38	3.92165	1.78278	2.42518	1.60444	1.12701	0.599675	3.37004
01-01-08-01-01-02-04.mp4	AV	Speech	Surprise	Normal	Kids	R2	A4	1	0.765582	4	3.7	0.674949	3	2.8	1.31656	6.5	2.27283	1.31097	1.35783	0.859002	1.45398	1.13186	3.33667
01-01-08-01-01-02-05.mp4	AV	Speech	Surprise	Normal	Kids	R2	A5	0.7	0.535907	4	3.3	1.25167	4	3.5	1.2693	4.76	2.56201	2.98545	1.46131	0.769026	1.13662	1.15355	3.67033
01-01-08-01-01-02-06.mp4	AV	Speech	Surprise	Normal	Kids	R2	A6	1	0.765582	3	3.1	0.994429	3.5	3.8	1.13529	6.9	2.08648	1.11695	2.11565	0.94109	0.979392	0.818553	3.23656
01-01-08-01-01-02-07.mp4	AV	Speech	Surprise	Normal	Kids	R2	A7	0.9	0.689024	3	3.2	1.0328	3	2.8	0.918937	5.4	1.82766	0.936812	1.44564	1.56794	0.68697	0.601655	3.53688
01-01-08-01-01-02-08.mp4	AV	Speech	Surprise	Normal	Kids	R2	A8	1	0.765582	4	3.4	1.07497	4	3.7	0.823273	7.1	1.65348	1.31179	1.98813	1.21761	1.71116	1.46934	3.80379
01-01-08-01-01-02-09.mp4	AV	Speech	Surprise	Normal	Kids	R2	A9	0.8	0.612466	3.5	3.5	0.849837	4	3.7	1.49443	5.76	2.92316	1.56731	1.88616	0.937196	1.44273	1.40819	3.33667
01-01-08-01-01-02-10.mp4	AV	Speech	Surprise	Normal	Kids	R2	A10	0.9	0.689024	3	3.4	0.843274	4	3.6	0.516398	6.3	2.60405	0.805649	2.36746	1.68273	1.78061	1.55699	3.40342
01-01-08-01-01-02-11.mp4	AV	Speech	Surprise	Normal	Kids	R2	A11	0.8	0.612466	4	3.9	0.875595	4	3.8	1.0328	6.16	2.23834	1.87712	1.21788	0.62547	0.611246	0.342891	3.13646
01-01-08-01-01-02-12.mp4	AV	Speech	Surprise	Normal	Kids	R2	A12	1	0.765582	3	3.2	1.22927	4	3.9	0.994429	7.1	1.7875	0.634996	2.23762	1.57346	1.2487	1.08387	3.63696
01-01-08-01-01-02-13.mp4	AV	Speech	Surprise	Normal	Kids	R2	A13	0.9	0.689024	4	3.7	1.25167	4.5	4.2	1.0328	7.11	1.58921	0.498172	1.92354	0.827646	0.761279	0.732137	3.13646
01-01-08-01-01-02-14.mp4	AV	Speech	Surprise	Normal	Kids	R2	A14	1	0.765582	3	3.3	1.1595	4	3.6	1.07497	6.9	1.83096	0.854215	2.37995	1.71973	1.21247	0.984749	3.57025
01-01-08-01-01-02-15.mp4	AV	Speech	Surprise	Normal	Kids	R2	A15	0.4	0.306233	2	2.5	1.50923	4	3.5	1.2693	2.4	2.55962	1.28585	1.57424	1.17453	0.886358	0.571892	3.43677
01-01-08-01-01-02-16.mp4	AV	Speech	Surprise	Normal	Kids	R2	A16	0.9	0.689024	4	4.2	0.788811	4	3.6	1.07497	7.02	1.85524	1.01419	1.88517	1.94859	0.65731	0.521015	3.43675
01-01-08-01-01-02-17.mp4	AV	Speech	Surprise	Normal	Kids	R2	A17	0.5	0.382791	3	3.4	0.516398	3	2.9	0.994429	3.15	3.72267	2.12424	1.76886	1.04878	0.753596	0.480024	3.63696
01-01-08-01-01-02-18.mp4	AV	Speech	Surprise	Normal	Kids	R2	A18	1	0.765582	3.5	3.5	0.527046	4	3.5	1.50923	7	1.52066	1.00937	1.93259	1.1086	1.15236	1.14801	3.5035
01-01-08-01-01-02-19.mp4	AV	Speech	Surprise	Normal	Kids	R2	A19	0.4	0.306233	3.5	3.6	0.699206	4.5	4.2	1.0328	3.12	3.55188	1.8776	2.73545	1.5285	1.05061	0.616141	3.53685
01-01-08-01-01-02-20.mp4	AV	Speech	Surprise	Normal	Kids	R2	A20	0.8	0.612466	4	3.9	0.737865	4	3.7	1.25167	6.08	1.55838	0.95401	2.25659	1.76184	1.08859	0.67119	3.57025
01-01-08-01-01-02-21.mp4	AV	Speech	Surprise	Normal	Kids	R2	A21	1	0.765582	4	3.5	0.971825	3.5	3.1	1.59513	6.6	2.54904	1.18648	2.78672	1.5234	1.61926	1.14058	3.47012
01-01-08-01-01-02-22.mp4	AV	Speech	Surprise	Normal	Kids	R2	A22	0.9	0.689024	2.5	2.5	1.2693	2	2.1	0.737865	4.14	2.55961	1.72242	1.69125	1.33077	0.850144	0.532362	3.57023
01-01-08-01-01-02-23.mp4	AV	Speech	Surprise	Normal	Kids	R2	A23	0.6	0.459349	3.5	3.2	1.47573	3	3.3	0.823273	3.9	2.59476	1.91627	1.63157	0.679231	0.786426	0.53417	3.23656
01-01-08-01-01-02-24.mp4	AV	Speech	Surprise	Normal	Kids	R2	A24	1	0.765582	4	3.8	1.0328	3.5	3.6	0.966092	7.4	1.49758	0.717464	1.66953	1.68397	0.438712	0.394562	3.47015
01-01-08-01-02-01-01.mp4	AV	Speech	Surprise	Normal	Dogs	R1	A1	0.9	0.689024	4	3.8	1.22927	4	4.2	0.918937	7.2	1.97671	1.04096	1.82435	0.712786	0.758036	0.606924	3.53688
01-01-08-01-02-01-02.mp4	AV	Speech	Surprise	Normal	Dogs	R1	A2	1	0.765582	4	3.8	0.918937	3.5	3.8	1.13529	7.6	1.76511	1.10402	2.64467	2.08636	1.38177	1.42541	3.6036
01-01-08-01-02-01-03.mp4	AV	Speech	Surprise	Normal	Dogs	R1	A3	0.8	0.612466	2.5	2.9	1.37032	3.5	3.6	1.17379	5.2	2.51349	1.78096	1.54804	0.712562	0.737968	0.579796	3.20321
01-01-08-01-02-01-04.mp4	AV	Speech	Surprise	Normal	Dogs	R1	A4	0.7	0.535907	4	3.9	1.1005	4	3.9	1.1005	5.46	2.07565	0.803915	1.55466	1.15397	0.603928	0.393896	3.63696
01-01-08-01-02-01-05.mp4	AV	Speech	Surprise	Normal	Dogs	R1	A5	0.6	0.459349	3	2.9	0.875595	4	3.6	1.17379	3.9	2.39513	1.50556	1.53437	1.2129	1.1875	0.555672	3.06973
01-01-08-01-02-01-06.mp4	AV	Speech	Surprise	Normal	Dogs	R1	A6	1	0.765582	3	3.4	0.843274	3.5	3.4	1.50555	6.8	1.60771	0.485108	1.80623	1.43906	0.736295	0.527668	3.20321
01-01-08-01-02-01-07.mp4	AV	Speech	Surprise	Normal	Dogs	R1	A7	0.9	0.689024	3.5	3.6	0.966092	3	3.2	1.22927	6.12	2.03421	0.975056	2.37986	1.52169	1.12838	0.796983	3.43677
01-01-08-01-02-01-08.mp4	AV	Speech	Surprise	Normal	Dogs	R1	A8	1	0.765582	4	3.8	0.788811	4	4	0.666667	7.8	2.54491	1.34572	2.1893	1.91579	0.801501	0.806121	3.77044
01-01-08-01-02-01-09.mp4	AV	Speech	Surprise	Normal	Dogs	R1	A9	0.9	0.689024	3.5	3.4	1.26491	4	4	0.666667	6.66	3.04493	2.14034	1.65321	1.27428	0.724286	0.84959	3.43677
01-01-08-01-02-01-10.mp4	AV	Speech	Surprise	Normal	Dogs	R1	A10	0.9	0.689024	4	4.1	0.875595	4	3.8	1.31656	7.11	1.51808	0.945127	1.86325	1.1174	0.628706	0.425188	3.5035
01-01-08-01-02-01-11.mp4	AV	Speech	Surprise	Normal	Dogs	R1	A11	0.9	0.689024	3.5	3.7	1.05935	4	4	0.942809	6.93	2.48217	1.41249	1.84869	1.24462	0.952077	0.535227	3.16983
01-01-08-01-02-01-12.mp4	AV	Speech	Surprise	Normal	Dogs	R1	A12	0.8	0.612466	4	3.5	0.971825	4	3.5	1.2693	5.6	2.78076	1.61858	1.57471	1.42985	0.730942	0.597383	3.5035
01-01-08-01-02-01-13.mp4	AV	Speech	Surprise	Normal	Dogs	R1	A13	0.7	0.535907	3.5	3.6	0.699206	3	3.4	0.966092	4.9	1.38537	0.926357	1.73837	1.10516	0.877617	0.677348	3.13648
01-01-08-01-02-01-14.mp4	AV	Speech	Surprise	Normal	Dogs	R1	A14	1	0.765582	3.5	3.3	0.823273	4	4.1	0.737865	7.4	1.7869	0.674543	2.23936	1.48901	1.57089	1.22039	3.20321
01-01-08-01-02-01-15.mp4	AV	Speech	Surprise	Normal	Dogs	R1	A15	0.7	0.535907	4	3.8	0.918937	4	4	0.666667	5.46	2.27156	1.45868	2.38934	1.52991	0.870995	0.693711	3.70371
01-01-08-01-02-01-16.mp4	AV	Speech	Surprise	Normal	Dogs	R1	A16	0.8	0.612466	4	3.7	0.948683	3	3.2	0.918937	5.52	2.82233	1.91836	1.92813	0.84597	1.39953	1.10061	3.5035
01-01-08-01-02-01-17.mp4	AV	Speech	Surprise	Normal	Dogs	R1	A17	0.9	0.689024	3	3.2	0.788811	3	3.1	1.19722	5.67	1.55436	0.809219	1.54291	0.786794	1.1025	0.708399	3.37004
01-01-08-01-02-01-18.mp4	AV	Speech	Surprise	Normal	Dogs	R1	A18	0.9	0.689024	4	4.1	0.994429	3.5	3.8	0.918937	7.11	1.91803	0.993496	1.91801	1.08465	0.797509	0.356752	3.5035
01-01-08-01-02-01-19.mp4	AV	Speech	Surprise	Normal	Dogs	R1	A19	0.9	0.689024	4	3.5	1.08012	3.5	3.7	1.05935	6.48	1.62301	1.02449	1.67212	0.991676	0.93162	0.729109	4.10408
01-01-08-01-02-01-20.mp4	AV	Speech	Surprise	Normal	Dogs	R1	A20	0.9	0.689024	3	3.3	0.948683	3	3.1	1.37032	5.76	1.45681	0.635617	1.32844	1.00563	0.801789	0.639757	3.13648
01-01-08-01-02-01-21.mp4	AV	Speech	Surprise	Normal	Dogs	R1	A21	0.9	0.689024	3.5	3.4	0.966092	4	3.1	1.28668	5.85	2.96057	2.0067	1.70961	1.10746	0.86614	0.551412	3.47015
01-01-08-01-02-01-22.mp4	AV	Speech	Surprise	Normal	Dogs	R1	A22	1	0.765582	3.5	3.4	0.966092	4	3.6	1.26491	7	1.78647	0.879292	1.4842	1.28284	0.840044	0.528086	3.43677
01-01-08-01-02-01-23.mp4	AV	Speech	Surprise	Normal	Dogs	R1	A23	0.9	0.689024	3	3.3	1.05935	3.5	3.1	1.52388	5.76	1.86427	0.947832	1.51015	0.657512	1.23569	0.879046	3.30329
01-01-08-01-02-01-24.mp4	AV	Speech	Surprise	Normal	Dogs	R1	A24	0.7	0.535907	3	2.7	1.1595	2.5	2.4	1.17379	3.57	3.10781	1.4866	2.15112	1.77796	0.875169	0.813879	3.37004
01-01-08-01-02-02-01.mp4	AV	Speech	Surprise	Normal	Dogs	R2	A1	0.8	0.612466	3.5	3.3	0.948683	3.5	3.3	1.33749	5.28	1.928	1.44341	1.90606	1.64222	1.36565	0.990785	3.26992
01-01-08-01-02-02-02.mp4	AV	Speech	Surprise	Normal	Dogs	R2	A2	1	0.765582	4	3.9	0.875595	4	3.6	1.3499	7.5	2.21839	1.5659	2.10989	1.18029	1.24423	0.777383	3.53688
01-01-08-01-02-02-03.mp4	AV	Speech	Surprise	Normal	Dogs	R2	A3	0.7	0.535907	4.5	4.1	1.1005	4.5	3.8	1.39841	5.53	2.54193	1.52424	1.6776	1.08389	1.31862	0.974765	3.57023
01-01-08-01-02-02-04.mp4	AV	Speech	Surprise	Normal	Dogs	R2	A4	1	0.765582	4	3.9	0.737865	2.5	2.7	1.56702	6.6	2.04352	0.795129	2.06511	0.895399	1.40057	0.850389	3.43675
01-01-08-01-02-02-05.mp4	AV	Speech	Surprise	Normal	Dogs	R2	A5	0.6	0.459349	3.5	3.6	0.699206	4.5	4.3	0.948683	4.74	2.44301	2.26089	1.9883	1.49485	0.680683	0.473564	3.70369
01-01-08-01-02-02-06.mp4	AV	Speech	Surprise	Normal	Dogs	R2	A6	1	0.765582	4	4.3	0.674949	4.5	4.4	0.699206	8.7	1.82468	0.975084	1.80648	1.45077	0.942259	0.448929	3.13646
01-01-08-01-02-02-07.mp4	AV	Speech	Surprise	Normal	Dogs	R2	A7	0.8	0.612466	3	3.1	0.994429	3.5	3.5	0.849837	5.28	1.70938	1.11324	2.12498	1.62799	1.05389	1.11133	3.43677
01-01-08-01-02-02-08.mp4	AV	Speech	Surprise	Normal	Dogs	R2	A8	1	0.765582	3.5	3.6	0.966092	3	3.5	1.35401	7.1	1.96207	0.631886	2.51056	1.41687	1.00603	1.11198	3.53688
01-01-08-01-02-02-09.mp4	AV	Speech	Surprise	Normal	Dogs	R2	A9	0.8	0.612466	3	3	1.1547	4	3.8	0.788811	5.44	2.70088	1.749	1.9438	1.18843	1.40338	1.2674	3.43675
01-01-08-01-02-02-10.mp4	AV	Speech	Surprise	Normal	Dogs	R2	A10	1	0.765582	4.5	4.1	0.994429	4.5	3.9	1.44914	8	1.26338	0.638018	1.63409	0.997621	0.869572	0.845257	3.47012
01-01-08-01-02-02-11.mp4	AV	Speech	Surprise	Normal	Dogs	R2	A11	1	0.765582	3	3	0.816497	4	3.5	0.971825	6.5	1.54338	0.476501	1.85237	1.51454	0.886713	0.538184	2.96963
01-01-08-01-02-02-12.mp4	AV	Speech	Surprise	Normal	Dogs	R2	A12	0.4	0.306233	2.5	2.7	1.33749	3	3.3	1.05935	2.4	2.54561	1.92195	1.05555	0.54853	0.994232	0.698438	3.6036
01-01-08-01-02-02-13.mp4	AV	Speech	Surprise	Normal	Dogs	R2	A13	0.8	0.612466	3	3.4	0.843274	3.5	3.7	0.823273	5.68	1.79903	0.812545	2.67913	1.29901	1.52815	1.33155	3.03638
01-01-08-01-02-02-14.mp4	AV	Speech	Surprise	Normal	Dogs	R2	A14	0.9	0.689024	3	2.8	0.632456	3	3.4	1.50555	5.58	2.3055	1.73213	2.25338	1.39689	1.1596	1.10142	3.30329
01-01-08-01-02-02-15.mp4	AV	Speech	Surprise	Normal	Dogs	R2	A15	0.9	0.689024	3	2.9	1.19722	4	3.8	1.0328	6.03	2.42617	1.96806	2.7691	1.53638	1.08701	0.836747	3.37004
01-01-08-01-02-02-16.mp4	AV	Speech	Surprise	Normal	Dogs	R2	A16	0.8	0.612466	3.5	3.8	0.918937	4	3.9	1.1005	6.16	1.4714	0.693468	1.16034	0.672085	0.663954	0.496019	3.43677
01-01-08-01-02-02-17.mp4	AV	Speech	Surprise	Normal	Dogs	R2	A17	0.8	0.612466	3	3.3	1.05935	2.5	2.8	1.61933	4.88	2.10827	0.725041	1.31344	0.815522	0.792696	1.16884	3.43677
01-01-08-01-02-02-18.mp4	AV	Speech	Surprise	Normal	Dogs	R2	A18	0.8	0.612466	3	3.2	1.22927	4	3.4	1.57762	5.28	2.13015	1.90255	1.99	0.876252	0.820303	0.359185	3.5035
01-01-08-01-02-02-19.mp4	AV	Speech	Surprise	Normal	Dogs	R2	A19	0.8	0.612466	4	3.8	1.13529	4	4	1.1547	6.24	1.3908	0.632767	2.05005	1.6391	0.382352	0.314824	3.06975
01-01-08-01-02-02-20.mp4	AV	Speech	Surprise	Normal	Dogs	R2	A20	0.7	0.535907	4	3.8	1.0328	4.5	4.3	0.823273	5.67	2.50993	2.21129	1.59485	0.561418	0.899683	0.673294	3.20319
01-01-08-01-02-02-21.mp4	AV	Speech	Surprise	Normal	Dogs	R2	A21	0.8	0.612466	3	3.3	0.483046	3	2.4	1.07497	4.56	3.74599	1.84208	2.5829	0.732241	2.43298	1.62473	3.57023
01-01-08-01-02-02-22.mp4	AV	Speech	Surprise	Normal	Dogs	R2	A22	1	0.765582	3.5	3.4	0.699206	4	3.7	0.823273	7.1	2.41289	2.08823	1.95008	0.851106	0.914658	0.709112	3.6036
01-01-08-01-02-02-23.mp4	AV	Speech	Surprise	Normal	Dogs	R2	A23	0.9	0.689024	4	3.8	0.632456	3.5	3.7	0.823273	6.75	2.09733	1.29541	2.37038	1.00551	1.1069	0.66879	3.30331
01-01-08-01-02-02-24.mp4	AV	Speech	Surprise	Normal	Dogs	R2	A24	0.3	0.229675	4	3.5	0.707107	2.5	2.8	1.0328	1.89	2.87338	2.31989	2.89957	2.41078	1.04834	0.859004	3.4034
01-01-08-02-01-01-01.mp4	AV	Speech	Surprise	Strong	Kids	R1	A1	1	0.765582	3	2.9	1.37032	3.5	3.1	1.37032	6	1.87964	1.04695	1.77131	1.04431	0.664416	0.488687	3.43675
01-01-08-02-01-01-02.mp4	AV	Speech	Surprise	Strong	Kids	R1	A2	0.9	0.689024	4	4	0.666667	4	4	0.666667	7.2	2.94576	2.24206	2.24817	1.3383	1.11524	1.27317	3.73706
01-01-08-02-01-01-03.mp4	AV	Speech	Surprise	Strong	Kids	R1	A3	0.9	0.689024	3.5	3.6	0.699206	4	3.4	1.7127	6.3	1.53594	0.629108	2.10802	1.69175	0.77638	0.510612	3.26994
01-01-08-02-01-01-04.mp4	AV	Speech	Surprise	Strong	Kids	R1	A4	1	0.765582	4	4.3	0.674949	4.5	4.2	0.918937	8.5	1.78186	0.790048	1.90635	1.75218	0.99418	1.04074	3.67033
01-01-08-02-01-01-05.mp4	AV	Speech	Surprise	Strong	Kids	R1	A5	1	0.765582	4	4	1.05409	3	3.2	1.54919	7.2	2.13164	1.1753	1.94001	1.12704	1.16086	0.617938	4.13748
01-01-08-02-01-01-06.mp4	AV	Speech	Surprise	Strong	Kids	R1	A6	1	0.765582	2.5	2.5	0.849837	3	2.4	1.07497	4.9	2.58726	2.19728	2.00412	1.44235	1.18967	1.2071	3.23656
01-01-08-02-01-01-07.mp4	AV	Speech	Surprise	Strong	Kids	R1	A7	0.9	0.689024	4	4	0.666667	4	3.4	1.17379	6.66	2.50158	1.49632	2.09905	1.07896	1.18431	0.544943	3.87054
01-01-08-02-01-01-08.mp4	AV	Speech	Surprise	Strong	Kids	R1	A8	0.9	0.689024	4	4.4	0.516398	4	3.6	1.26491	7.2	1.6995	0.872285	2.7208	1.82842	1.17004	0.844186	3.83717
01-01-08-02-01-01-09.mp4	AV	Speech	Surprise	Strong	Kids	R1	A9	0.9	0.689024	4	4.3	0.674949	4	3.7	0.948683	7.2	2.92965	2.47983	2.14864	1.52292	0.637673	0.549129	3.30329
01-01-08-02-01-01-10.mp4	AV	Speech	Surprise	Strong	Kids	R1	A10	1	0.765582	4	3.9	0.567646	4.5	4.4	0.699206	8.3	2.21951	1.35927	3.07299	1.65004	1.42187	1.18958	3.5035
01-01-08-02-01-01-11.mp4	AV	Speech	Surprise	Strong	Kids	R1	A11	1	0.765582	4	4	0.816497	4	3.6	1.3499	7.6	1.5949	0.715406	2.14015	1.48492	0.75602	0.620428	3.06973
01-01-08-02-01-01-12.mp4	AV	Speech	Surprise	Strong	Kids	R1	A12	1	0.765582	4	3.9	0.737865	4	3.6	1.57762	7.5	2.42247	1.25581	1.73119	1.72224	0.918257	0.974778	3.70369
01-01-08-02-01-01-13.mp4	AV	Speech	Surprise	Strong	Kids	R1	A13	0.9	0.689024	4	3.5	0.707107	4	4.1	0.567646	6.84	2.05564	1.07525	2.65053	1.06545	1.09233	0.709425	3.33667
01-01-08-02-01-01-14.mp4	AV	Speech	Surprise	Strong	Kids	R1	A14	0.9	0.689024	4.5	4.3	0.823273	4	3.6	1.17379	7.11	1.55428	0.370765	1.75314	1.84306	0.887743	1.30901	3.97063
01-01-08-02-01-01-15.mp4	AV	Speech	Surprise	Strong	Kids	R1	A15	0.5	0.382791	4	3.8	0.421637	3	3.3	0.948683	3.55	1.99852	0.753479	2.33636	1.68491	1.14979	0.859329	3.37002
01-01-08-02-01-01-16.mp4	AV	Speech	Surprise	Strong	Kids	R1	A16	0.8	0.612466	3.5	3.5	1.2693	3.5	3.6	1.42984	5.68	2.9729	1.56908	2.00821	1.20338	1.47512	1.18624	3.53688
01-01-08-02-01-01-17.mp4	AV	Speech	Surprise	Strong	Kids	R1	A17	1	0.765582	4.5	4.4	0.699206	3.5	3.1	1.37032	7.5	2.10379	1.4697	3.05072	1.22525	1.59439	0.788798	3.53688
01-01-08-02-01-01-18.mp4	AV	Speech	Surprise	Strong	Kids	R1	A18	1	0.765582	4.5	4.3	0.823273	4.5	3.9	1.44914	8.2	2.2089	1.41838	1.64804	0.818542	0.706011	0.545983	3.63698
01-01-08-02-01-01-19.mp4	AV	Speech	Surprise	Strong	Kids	R1	A19	1	0.765582	5	4.4	0.966092	3.5	3.7	1.33749	8.1	1.79777	0.489174	1.43329	1.10121	1.0382	0.894366	4.1041
01-01-08-02-01-01-20.mp4	AV	Speech	Surprise	Strong	Kids	R1	A20	0.9	0.689024	5	4.6	0.699206	4.5	4.4	0.699206	8.1	2.22619	1.30276	1.45326	1.24063	0.511318	0.501297	3.73706
01-01-08-02-01-01-21.mp4	AV	Speech	Surprise	Strong	Kids	R1	A21	1	0.765582	3.5	3.4	0.699206	3	2.5	1.35401	5.9	1.74746	0.877415	2.06778	1.10423	0.836217	0.48394	3.63696
01-01-08-02-01-01-22.mp4	AV	Speech	Surprise	Strong	Kids	R1	A22	1	0.765582	3.5	3.6	1.17379	3.5	3.4	1.07497	7	2.58602	2.23013	1.96145	1.19506	1.22804	0.8251	3.57023
01-01-08-02-01-01-23.mp4	AV	Speech	Surprise	Strong	Kids	R1	A23	0.9	0.689024	4	3.9	0.875595	4.5	3.9	1.44914	7.02	2.09897	1.8337	1.71331	1.30222	0.492651	0.387411	3.5035
01-01-08-02-01-01-24.mp4	AV	Speech	Surprise	Strong	Kids	R1	A24	1	0.765582	4	4.1	0.994429	2.5	2.4	1.42984	6.5	1.84985	0.448046	1.57942	0.848431	0.863792	0.492865	3.93727
01-01-08-02-01-02-01.mp4	AV	Speech	Surprise	Strong	Kids	R2	A1	0.6	0.459349	4	3.7	0.674949	4	4	1.1547	4.62	2.31763	0.937852	2.2288	1.09245	0.800474	0.651744	3.57023
01-01-08-02-01-02-02.mp4	AV	Speech	Surprise	Strong	Kids	R2	A2	1	0.765582	3.5	3.5	0.849837	4	2.9	1.44914	6.4	1.73491	0.636714	2.14481	0.922877	0.742946	0.34988	3.77044
01-01-08-02-01-02-03.mp4	AV	Speech	Surprise	Strong	Kids	R2	A3	0.9	0.689024	4	3.8	1.0328	4.5	3.7	1.56702	6.75	1.95967	1.12398	1.89347	1.61513	0.7462	0.765885	3.6036
01-01-08-02-01-02-04.mp4	AV	Speech	Surprise	Strong	Kids	R2	A4	1	0.765582	4	4	1.1547	2	2.6	1.42984	6.6	1.73068	0.501071	2.08415	1.30095	1.4556	1.07441	3.57023
01-01-08-02-01-02-05.mp4	AV	Speech	Surprise	Strong	Kids	R2	A5	0.8	0.612466	4	3.7	1.33749	3	3.2	1.68655	5.52	2.69549	1.87328	1.63624	1.32577	0.885286	0.718997	4.1041
01-01-08-02-01-02-06.mp4	AV	Speech	Surprise	Strong	Kids	R2	A6	0.9	0.689024	4	4.3	0.483046	3	3.1	1.19722	6.66	2.65212	1.00565	2.72243	1.91788	1.23861	0.99516	3.37004
01-01-08-02-01-02-07.mp4	AV	Speech	Surprise	Strong	Kids	R2	A7	1	0.765582	4	3.9	0.567646	4	3.8	0.918937	7.7	1.76484	1.02313	2.05506	1.4025	0.884157	0.628273	3.63696
01-01-08-02-01-02-08.mp4	AV	Speech	Surprise	Strong	Kids	R2	A8	1	0.765582	4	3.7	0.948683	4	3.6	1.17379	7.3	2.44115	1.72786	1.73125	1.59732	0.691149	0.420319	3.70369
01-01-08-02-01-02-09.mp4	AV	Speech	Surprise	Strong	Kids	R2	A9	0.9	0.689024	3	3	1.1547	4	3.9	0.567646	6.21	2.56267	1.8543	1.47001	1.17292	1.07319	0.836732	3.26994
01-01-08-02-01-02-10.mp4	AV	Speech	Surprise	Strong	Kids	R2	A10	0.9	0.689024	4	4	0.942809	5	4.6	0.516398	7.74	1.91084	1.90871	2.07534	1.22437	0.624116	0.545283	3.4034
01-01-08-02-01-02-11.mp4	AV	Speech	Surprise	Strong	Kids	R2	A11	1	0.765582	4	4.1	0.737865	5	4.6	0.699206	8.7	1.40043	0.810383	1.68505	0.864675	0.345194	0.0922916	3.1031
01-01-08-02-01-02-12.mp4	AV	Speech	Surprise	Strong	Kids	R2	A12	0.8	0.612466	3	3.1	1.1005	2.5	2.8	1.47573	4.72	1.97219	1.91141	1.97042	1.9913	0.641239	0.564661	3.73706
01-01-08-02-01-02-13.mp4	AV	Speech	Surprise	Strong	Kids	R2	A13	0.5	0.382791	3	3.3	0.674949	3	3.4	0.843274	3.35	3.31575	2.41615	1.73422	0.937109	0.767673	0.633201	3.30329
01-01-08-02-01-02-14.mp4	AV	Speech	Surprise	Strong	Kids	R2	A14	1	0.765582	3.5	3.2	0.918937	3	2.7	1.05935	5.9	1.93808	0.512888	2.85463	1.49837	1.2238	0.572614	3.70371
01-01-08-02-01-02-15.mp4	AV	Speech	Surprise	Strong	Kids	R2	A15	0.1	0.0765582	4	3.6	0.843274	4	3.9	1.19722	0.75	1.81769	0.991788	1.86354	1.34174	0.79984	0.617309	3.30329
01-01-08-02-01-02-16.mp4	AV	Speech	Surprise	Strong	Kids	R2	A16	0.9	0.689024	4.5	4.4	0.699206	4.5	4.4	0.699206	7.92	2.11947	1.10316	1.78974	1.4697	1.18917	1.23105	3.53685
01-01-08-02-01-02-17.mp4	AV	Speech	Surprise	Strong	Kids	R2	A17	0.8	0.612466	4	3.8	1.22927	4	3.6	1.3499	5.92	2.33391	1.45908	1.05786	0.858182	0.920747	0.705444	3.67033
01-01-08-02-01-02-18.mp4	AV	Speech	Surprise	Strong	Kids	R2	A18	0.9	0.689024	4	4.2	0.632456	3.5	3.5	1.35401	6.93	1.27798	0.539048	1.78676	0.871521	0.854984	0.574989	3.53688
01-01-08-02-01-02-19.mp4	AV	Speech	Surprise	Strong	Kids	R2	A19	0.8	0.612466	5	4.3	0.948683	3.5	3.4	1.64655	6.16	2.19366	1.29068	2.23372	1.62971	0.945118	0.837081	4.63798
01-01-08-02-01-02-20.mp4	AV	Speech	Surprise	Strong	Kids	R2	A20	0.9	0.689024	4.5	4.2	0.918937	4	3.9	0.875595	7.29	1.74415	1.05619	2.19459	1.38449	0.659543	0.465951	3.23658
01-01-08-02-01-02-21.mp4	AV	Speech	Surprise	Strong	Kids	R2	A21	0.8	0.612466	3	3.1	1.1005	3	2.8	1.47573	4.72	2.01969	2.05433	1.82566	1.41061	1.05228	0.925552	3.63698
01-01-08-02-01-02-22.mp4	AV	Speech	Surprise	Strong	Kids	R2	A22	1	0.765582	3.5	3.2	1.0328	3	3.2	1.13529	6.4	2.22466	1.54215	2.5916	1.33876	0.980472	0.791472	3.73708
01-01-08-02-01-02-23.mp4	AV	Speech	Surprise	Strong	Kids	R2	A23	0.7	0.535907	3.5	3.4	0.966092	4	3.6	1.07497	4.9	2.49626	0.861662	1.80276	1.04289	0.568075	0.357281	3.37002
01-01-08-02-01-02-24.mp4	AV	Speech	Surprise	Strong	Kids	R2	A24	0.8	0.612466	4	4	0.942809	3.5	3.4	1.50555	5.92	2.14696	1.26184	1.35763	0.832556	0.710953	0.872881	3.97063
01-01-08-02-02-01-01.mp4	AV	Speech	Surprise	Strong	Dogs	R1	A1	0.6	0.459349	3.5	3.5	0.849837	3.5	3.4	0.966092	4.14	2.86071	1.50279	2.90321	2.02238	0.932625	0.329631	3.5035
01-01-08-02-02-01-02.mp4	AV	Speech	Surprise	Strong	Dogs	R1	A2	1	0.765582	4	4	0.816497	5	4.5	0.707107	8.5	2.11391	1.0156	2.13722	1.21834	0.733348	0.534863	3.73708
01-01-08-02-02-01-03.mp4	AV	Speech	Surprise	Strong	Dogs	R1	A3	0.8	0.612466	4	3.8	1.39841	3	3.4	1.26491	5.76	1.93466	1.57127	1.71494	1.23498	0.502709	0.362536	3.5035
01-01-08-02-02-01-04.mp4	AV	Speech	Surprise	Strong	Dogs	R1	A4	1	0.765582	5	4.7	0.483046	3	3.3	1.25167	8	1.67991	0.77903	1.98994	1.22595	0.899994	0.505948	3.47012
01-01-08-02-02-01-05.mp4	AV	Speech	Surprise	Strong	Dogs	R1	A5	0.9	0.689024	4	3.7	0.674949	3	3.3	0.674949	6.3	1.69579	1.11901	2.00173	1.73963	1.09025	0.961125	3.67033
01-01-08-02-02-01-06.mp4	AV	Speech	Surprise	Strong	Dogs	R1	A6	0.7	0.535907	4	4.1	0.875595	4	3.3	1.70294	5.18	2.56507	1.58122	1.69827	0.895737	1.10381	0.807043	3.30331
01-01-08-02-02-01-07.mp4	AV	Speech	Surprise	Strong	Dogs	R1	A7	0.9	0.689024	4	4.1	0.737865	4	3.4	1.50555	6.75	1.48495	1.05058	2.15138	1.19975	1.68277	1.47577	3.43677
01-01-08-02-02-01-08.mp4	AV	Speech	Surprise	Strong	Dogs	R1	A8	1	0.765582	4	3.9	0.737865	3	3.1	1.1005	7	1.65199	0.683819	2.26291	1.90258	0.647329	0.516588	3.80379
01-01-08-02-02-01-09.mp4	AV	Speech	Surprise	Strong	Dogs	R1	A9	0.9	0.689024	3.5	3.4	1.07497	4.5	4.2	1.22927	6.84	1.69761	0.950594	1.24143	0.550326	0.82719	0.450749	3.4034
01-01-08-02-02-01-10.mp4	AV	Speech	Surprise	Strong	Dogs	R1	A10	0.9	0.689024	5	4.5	0.707107	4.5	3.9	1.44914	7.56	1.74919	0.775129	1.26009	0.802724	0.737776	0.516475	3.63696
01-01-08-02-02-01-11.mp4	AV	Speech	Surprise	Strong	Dogs	R1	A11	1	0.765582	4	4.1	0.875595	5	4.4	0.843274	8.5	1.7167	0.627479	1.8185	1.00837	0.947289	0.731829	3.06973
01-01-08-02-02-01-12.mp4	AV	Speech	Surprise	Strong	Dogs	R1	A12	1	0.765582	5	4.5	0.707107	3.5	3.4	1.3499	7.9	1.38848	0.560571	2.22131	1.77047	0.754178	0.768452	3.73706
01-01-08-02-02-01-13.mp4	AV	Speech	Surprise	Strong	Dogs	R1	A13	0.6	0.459349	3.5	3.6	0.699206	4	4.1	0.875595	4.62	1.21508	0.8722	1.6274	0.748295	0.833215	0.52566	3.33667
01-01-08-02-02-01-14.mp4	AV	Speech	Surprise	Strong	Dogs	R1	A14	0.9	0.689024	4	3.8	1.0328	4	3.4	1.3499	6.48	2.07205	0.777016	2.40242	1.85769	0.773012	0.698952	3.70371
01-01-08-02-02-01-15.mp4	AV	Speech	Surprise	Strong	Dogs	R1	A15	0.4	0.306233	2.5	2.7	1.05935	3	2.9	1.1005	2.24	2.99056	2.18256	1.76972	2.03213	1.10885	0.984594	3.20321
01-01-08-02-02-01-16.mp4	AV	Speech	Surprise	Strong	Dogs	R1	A16	0.8	0.612466	4	4.3	0.674949	4	3.5	1.43372	6.24	1.63999	0.743543	1.7449	1.74666	0.891666	0.613121	3.57025
01-01-08-02-02-01-17.mp4	AV	Speech	Surprise	Strong	Dogs	R1	A17	0.7	0.535907	4	3.9	1.1005	4	3.6	1.57762	5.25	1.97069	0.894175	1.7549	1.35569	0.69824	0.680663	3.43677
01-01-08-02-02-01-18.mp4	AV	Speech	Surprise	Strong	Dogs	R1	A18	0.7	0.535907	4	4.3	0.483046	4	3.7	1.25167	5.6	2.39626	1.27082	1.58706	0.546084	1.24775	1.33557	3.87054
01-01-08-02-02-01-19.mp4	AV	Speech	Surprise	Strong	Dogs	R1	A19	1	0.765582	4.5	4.3	0.823273	5	4.5	0.849837	8.8	1.96351	1.17609	1.66226	1.28849	0.668531	1.11403	3.23658
01-01-08-02-02-01-20.mp4	AV	Speech	Surprise	Strong	Dogs	R1	A20	0.7	0.535907	3.5	3.8	0.918937	3.5	3.6	0.699206	5.18	3.49244	2.45877	2.09866	1.52319	0.807471	0.466222	3.53685
01-01-08-02-02-01-21.mp4	AV	Speech	Surprise	Strong	Dogs	R1	A21	1	0.765582	3.5	3.5	1.35401	2.5	3	1.63299	6.5	2.20413	1.3868	3.00501	1.6492	0.929653	0.764266	3.47015
01-01-08-02-02-01-22.mp4	AV	Speech	Surprise	Strong	Dogs	R1	A22	0.7	0.535907	4	3.1	1.28668	2	2.3	1.1595	3.78	2.40891	1.15964	2.10948	1.819	0.686269	0.846591	3.70371
01-01-08-02-02-01-23.mp4	AV	Speech	Surprise	Strong	Dogs	R1	A23	0.8	0.612466	4	3.8	0.632456	4	3.4	1.3499	5.76	2.26996	1.70843	1.50831	0.948722	0.459372	0.302724	3.33667
01-01-08-02-02-01-24.mp4	AV	Speech	Surprise	Strong	Dogs	R1	A24	0.7	0.535907	3	2.7	0.823273	2	1.7	0.674949	3.08	1.50028	0.701394	2.13156	1.26034	1.24159	0.683465	3.67033
01-01-08-02-02-02-01.mp4	AV	Speech	Surprise	Strong	Dogs	R2	A1	0.8	0.612466	4	3.5	0.971825	3	3.3	1.25167	5.44	1.90127	1.80134	1.64252	1.17749	0.809765	0.724686	3.26994
01-01-08-02-02-02-02.mp4	AV	Speech	Surprise	Strong	Dogs	R2	A2	1	0.765582	4	4.2	0.788811	4	3.6	1.50555	7.8	1.64853	0.646202	1.64118	0.846876	0.854255	0.875724	3.80381
01-01-08-02-02-02-03.mp4	AV	Speech	Surprise	Strong	Dogs	R2	A3	0.9	0.689024	3	3.2	0.918937	3	3.1	1.19722	5.67	1.6612	0.607935	1.52572	0.953773	1.09775	0.404439	3.23656
01-01-08-02-02-02-04.mp4	AV	Speech	Surprise	Strong	Dogs	R2	A4	0.9	0.689024	4	4.2	0.788811	3	3	1.56347	6.48	2.49063	1.05181	2.11375	1.20615	0.985003	0.30813	3.53685
01-01-08-02-02-02-05.mp4	AV	Speech	Surprise	Strong	Dogs	R2	A5	0.9	0.689024	4	3.6	1.07497	4	3.9	0.737865	6.75	1.81353	0.749738	1.59214	0.909908	0.917794	0.685077	3.53688
01-01-08-02-02-02-06.mp4	AV	Speech	Surprise	Strong	Dogs	R2	A6	1	0.765582	4	4.1	0.737865	3.5	3.4	1.26491	7.5	2.34386	1.58373	1.53883	0.850271	1.10878	0.91861	3.20321
01-01-08-02-02-02-07.mp4	AV	Speech	Surprise	Strong	Dogs	R2	A7	0.9	0.689024	4	4	0.666667	4	3.6	0.966092	6.84	1.99967	1.32682	2.59321	1.47251	1.52643	1.19845	3.47012
01-01-08-02-02-02-08.mp4	AV	Speech	Surprise	Strong	Dogs	R2	A8	0.7	0.535907	4	3.7	1.1595	5	4.7	0.483046	5.88	1.48527	1.1986	1.89179	1.32963	0.928525	0.770959	3.87054
01-01-08-02-02-02-09.mp4	AV	Speech	Surprise	Strong	Dogs	R2	A9	0.9	0.689024	4	3.8	1.22927	4	3.6	1.3499	6.66	2.14558	1.06735	2.2908	1.53256	0.949797	0.58031	3.43675
01-01-08-02-02-02-10.mp4	AV	Speech	Surprise	Strong	Dogs	R2	A10	1	0.765582	4	3.9	1.19722	3.5	3.2	1.0328	7.1	1.74417	1.74862	1.69027	1.07073	0.828048	0.343764	3.5035
01-01-08-02-02-02-11.mp4	AV	Speech	Surprise	Strong	Dogs	R2	A11	0.8	0.612466	3	3.5	0.971825	3	3.4	1.26491	5.52	1.73039	0.909147	1.80069	1.17519	1.01628	0.768444	3.06973
01-01-08-02-02-02-12.mp4	AV	Speech	Surprise	Strong	Dogs	R2	A12	0.9	0.689024	4	3.7	0.948683	4	3.7	0.948683	6.66	1.56326	0.915333	1.49366	0.41444	0.867778	0.372563	3.67033
01-01-08-02-02-02-13.mp4	AV	Speech	Surprise	Strong	Dogs	R2	A13	0.8	0.612466	4	3.7	0.948683	4	3.4	1.07497	5.68	1.8059	0.552702	1.50859	0.888457	0.846299	0.61078	3.30329
01-01-08-02-02-02-14.mp4	AV	Speech	Surprise	Strong	Dogs	R2	A14	0.9	0.689024	4	4.2	0.788811	4.5	4	1.24722	7.38	1.78015	1.18458	2.12161	1.29921	0.504089	0.41641	3.73706
01-01-08-02-02-02-15.mp4	AV	Speech	Surprise	Strong	Dogs	R2	A15	0.1	0.0765582	3.5	3.8	0.918937	3	3.5	1.17851	0.73	2.74305	1.97008	1.22697	0.784964	0.781241	0.470747	3.33667
01-01-08-02-02-02-16.mp4	AV	Speech	Surprise	Strong	Dogs	R2	A16	0.9	0.689024	4	3.9	0.737865	4	3.9	1.19722	7.02	2.43911	1.89628	1.49942	1.36965	0.952345	0.481067	3.57023
01-01-08-02-02-02-17.mp4	AV	Speech	Surprise	Strong	Dogs	R2	A17	1	0.765582	4	3.9	1.19722	3	3.3	1.49443	7.2	1.98553	1.43433	2.0773	1.32044	0.511533	0.418269	3.53685
01-01-08-02-02-02-18.mp4	AV	Speech	Surprise	Strong	Dogs	R2	A18	0.8	0.612466	4	4.1	0.875595	4	3.4	1.42984	6	2.55168	0.985343	2.55481	1.91033	1.27124	0.756953	3.63696
01-01-08-02-02-02-19.mp4	AV	Speech	Surprise	Strong	Dogs	R2	A19	0.9	0.689024	5	4.6	0.699206	4	4.1	0.994429	7.83	1.97491	1.21427	2.09364	1.3924	0.956677	0.714061	3.26994
01-01-08-02-02-02-20.mp4	AV	Speech	Surprise	Strong	Dogs	R2	A20	0.9	0.689024	4	3.9	1.1005	4	4.3	0.674949	7.38	1.70817	0.370769	2.53985	1.68803	1.10587	0.942177	3.43677
01-01-08-02-02-02-21.mp4	AV	Speech	Surprise	Strong	Dogs	R2	A21	1	0.765582	5	4	1.33333	4	3.5	1.64992	7.5	2.06412	1.02526	2.16212	1.20742	0.773268	0.34415	3.53688
01-01-08-02-02-02-22.mp4	AV	Speech	Surprise	Strong	Dogs	R2	A22	0.9	0.689024	3	3.2	1.0328	2	2.6	1.7127	5.22	2.07246	1.72498	1.635	0.883268	1.14225	1.20869	3.63696
01-01-08-02-02-02-23.mp4	AV	Speech	Surprise	Strong	Dogs	R2	A23	0.8	0.612466	4	3.6	1.07497	3	3.3	1.05935	5.52	1.34592	0.474752	1.76066	1.24302	0.6191	0.38786	3.30329
01-01-08-02-02-02-24.mp4	AV	Speech	Surprise	Strong	Dogs	R2	A24	0.6	0.459349	3	3.4	0.843274	2.5	2.6	1.64655	3.6	2.85008	1.37251	1.68283	0.691315	1.08766	0.754073	3.63696
02-01-01-01-01-01-01.mp4	VO	Speech	Neutral	Normal	Kids	R1	A1	1	0.688199	4.5	3.8	1.39841	4	3.9	1.28668	10	1.71932	1.18094	1.65739	1.24631	1.08063	0.75578	3.30329
02-01-01-01-01-01-02.mp4	VO	Speech	Neutral	Normal	Kids	R1	A2	0.6	0.41292	3	3.3	0.948683	3	3.1	1.19722	6	2.10831	2.17348	1.46626	1.15233	0.953007	1.075	3.63696
02-01-01-01-01-01-03.mp4	VO	Speech	Neutral	Normal	Kids	R1	A3	0.5	0.3441	3.5	3.4	1.42984	4	3.8	1.0328	5	2.33274	0.945171	1.49912	1.25451	1.1534	0.976666	3.43677
02-01-01-01-01-01-04.mp4	VO	Speech	Neutral	Normal	Kids	R1	A4	0.8	0.550559	2	2.9	1.85293	4	3.4	1.3499	8	2.12878	1.51669	1.07013	0.573993	0.894242	0.79799	3.30329
02-01-01-01-01-01-05.mp4	VO	Speech	Neutral	Normal	Kids	R1	A5	0.9	0.619379	4	3.4	1.57762	4	3.7	1.1595	9	1.16995	0.61715	1.60925	1.45966	0.805944	0.553639	3.6036
02-01-01-01-01-01-06.mp4	VO	Speech	Neutral	Normal	Kids	R1	A6	0.6	0.41292	3	3.1	1.37032	3.5	3.2	1.47573	6	1.93505	2.21487	1.30194	1.25417	0.888796	0.97855	3.33667
02-01-01-01-01-01-07.mp4	VO	Speech	Neutral	Normal	Kids	R1	A7	0.9	0.619379	3	2.8	1.22927	4	3.5	1.2693	9	1.39005	0.829746	1.09457	0.92621	0.826617	0.697129	3.90392
02-01-01-01-01-01-08.mp4	VO	Speech	Neutral	Normal	Kids	R1	A8	0.9	0.619379	3.5	3.5	0.849837	3	3.3	0.823273	9	2.3076	1.97394	0.835833	0.584023	0.71286	0.6986	3.5035
02-01-01-01-01-01-09.mp4	VO	Speech	Neutral	Normal	Kids	R1	A9	0.7	0.481739	2	2.5	1.2693	4	3.6	1.26491	7	2.53082	1.94093	1.01317	0.609708	1.0717	1.03455	3.26994
02-01-01-01-01-01-10.mp4	VO	Speech	Neutral	Normal	Kids	R1	A10	0.7	0.481739	2	2.3	1.25167	2	2.6	1.42984	7	2.03355	1.13851	1.93112	1.05501	1.03767	0.644528	3.53688
02-01-01-01-01-01-11.mp4	VO	Speech	Neutral	Normal	Kids	R1	A11	1	0.688199	3.5	3.7	1.05935	3.5	3.6	1.26491	10	2.62713	2.12829	1.31567	0.877484	1.36841	1.03294	3.13648
02-01-01-01-01-01-12.mp4	VO	Speech	Neutral	Normal	Kids	R1	A12	1	0.688199	3	3.1	1.66333	3.5	3.5	1.17851	10	1.5494	0.646365	2.07842	1.34234	1.20124	1.05413	3.63696
02-01-01-01-01-01-13.mp4	VO	Speech	Neutral	Normal	Kids	R1	A13	0.7	0.481739	3.5	3.3	1.56702	3	3.3	1.05935	7	2.10208	1.8697	1.78923	1.66351	0.728122	0.453864	3.16983
02-01-01-01-01-01-14.mp4	VO	Speech	Neutral	Normal	Kids	R1	A14	0.8	0.550559	3	2.9	1.1005	3.5	3.7	1.05935	8	2.99264	2.4868	2.7817	1.47851	1.43091	0.615656	3.47012
02-01-01-01-01-01-15.mp4	VO	Speech	Neutral	Normal	Kids	R1	A15	1	0.688199	3.5	3.6	1.42984	3.5	3.6	1.42984	10	1.35855	1.47784	1.32381	0.978866	0.739428	0.858453	3.37004
02-01-01-01-01-01-16.mp4	VO	Speech	Neutral	Normal	Kids	R1	A16	0.3	0.20646	3	3.3	1.05935	3.5	3.4	1.07497	3	2.50477	1.73942	1.53902	1.0466	0.908152	0.693854	3.73706
02-01-01-01-01-01-17.mp4	VO	Speech	Neutral	Normal	Kids	R1	A17	0.8	0.550559	3	3	1.33333	3	3.1	1.1005	8	1.62649	0.743607	1.28658	0.797441	0.582475	0.31401	3.83717
02-01-01-01-01-01-18.mp4	VO	Speech	Neutral	Normal	Kids	R1	A18	0.8	0.550559	3.5	3.1	1.37032	4	3.7	1.25167	8	2.7502	2.15835	2.31945	1.54551	1.06738	0.979639	3.47015
02-01-01-01-01-01-19.mp4	VO	Speech	Neutral	Normal	Kids	R1	A19	0.9	0.619379	3	2.8	1.22927	3	2.9	1.28668	9	1.74353	1.35629	1.5723	0.83849	0.774989	0.487033	3.37004
02-01-01-01-01-01-20.mp4	VO	Speech	Neutral	Normal	Kids	R1	A20	0.9	0.619379	2	2.4	1.3499	3	2.8	1.31656	9	1.91239	1.98157	1.40852	0.960752	0.907717	0.547415	3.47012
02-01-01-01-01-01-21.mp4	VO	Speech	Neutral	Normal	Kids	R1	A21	0.7	0.481739	3	3.4	1.26491	3.5	3.5	1.35401	7	2.20167	2.21393	2.13553	2.04771	0.84136	0.837237	3.83717
02-01-01-01-01-01-22.mp4	VO	Speech	Neutral	Normal	Kids	R1	A22	0.7	0.481739	4	4.2	0.788811	4	3.8	1.0328	7	1.71742	1.41454	1.52236	1.25378	0.976588	1.19844	3.63698
02-01-01-01-01-01-23.mp4	VO	Speech	Neutral	Normal	Kids	R1	A23	0.8	0.550559	3	2.6	1.07497	3	2.7	0.948683	8	2.53806	1.90364	1.51672	0.778318	0.938053	0.796906	3.80379
02-01-01-01-01-01-24.mp4	VO	Speech	Neutral	Normal	Kids	R1	A24	1	0.688199	3	3.3	1.49443	3	3.2	0.918937	10	1.30072	0.547111	1.90954	1.83883	0.767663	0.637292	3.70371
02-01-01-01-01-02-01.mp4	VO	Speech	Neutral	Normal	Kids	R2	A1	1	0.688199	4	3.6	1.26491	4.5	3.9	1.37032	10	1.79839	1.53453	1.46192	0.585003	1.14267	0.707768	3.33667
02-01-01-01-01-02-02.mp4	VO	Speech	Neutral	Normal	Kids	R2	A2	0.8	0.550559	4	3.4	1.42984	4	4.1	1.19722	8	1.97379	1.03471	1.08779	0.840906	0.904111	0.946414	3.6036
02-01-01-01-01-02-03.mp4	VO	Speech	Neutral	Normal	Kids	R2	A3	0.4	0.27528	3	3.1	0.994429	3	3.4	0.516398	4	1.65265	0.846312	1.90212	1.10705	0.798995	0.67855	3.5035
02-01-01-01-01-02-04.mp4	VO	Speech	Neutral	Normal	Kids	R2	A4	0.8	0.550559	2.5	2.3	1.25167	3.5	3.4	1.07497	8	2.1242	1.97971	1.62125	0.666779	1.15954	0.630262	3.37004
02-01-01-01-01-02-05.mp4	VO	Speech	Neutral	Normal	Kids	R2	A5	0.9	0.619379	3.5	3.8	0.918937	4	4.1	0.994429	9	1.23166	1.01716	2.11531	1.92185	1.21973	0.941676	3.63698
02-01-01-01-01-02-06.mp4	VO	Speech	Neutral	Normal	Kids	R2	A6	1	0.688199	2.5	2.9	1.37032	3.5	3.4	1.26491	10	1.7701	1.72809	1.55955	0.576349	1.02418	0.730048	3.6036
02-01-01-01-01-02-07.mp4	VO	Speech	Neutral	Normal	Kids	R2	A7	0.9	0.619379	3	3.2	1.39841	3	3.1	1.1005	9	1.45499	0.884933	1.63421	0.939443	1.1262	0.960121	3.80381
02-01-01-01-01-02-08.mp4	VO	Speech	Neutral	Normal	Kids	R2	A8	0.9	0.619379	3	3.5	1.17851	3	3.6	1.07497	9	2.64196	2.3241	1.94336	1.19935	1.19475	1.00286	3.63698
02-01-01-01-01-02-09.mp4	VO	Speech	Neutral	Normal	Kids	R2	A9	0.7	0.481739	2	2.1	0.994429	2.5	2.7	1.33749	7	1.39516	1.15881	1.86064	1.48653	1.09344	0.713137	3.20321
02-01-01-01-01-02-10.mp4	VO	Speech	Neutral	Normal	Kids	R2	A10	0.6	0.41292	4	3.6	1.07497	4	4	0.816497	6	1.11724	0.562128	1.5584	1.40938	1.0141	0.805395	3.83717
02-01-01-01-01-02-11.mp4	VO	Speech	Neutral	Normal	Kids	R2	A11	1	0.688199	3	3.2	1.13529	3.5	3.7	1.05935	10	2.17105	1.776	1.84404	1.14696	0.748957	0.732841	3.1031
02-01-01-01-01-02-12.mp4	VO	Speech	Neutral	Normal	Kids	R2	A12	1	0.688199	3	3.4	1.07497	3.5	3.4	0.966092	10	1.37335	0.598965	1.97835	2.07342	1.02822	1.15121	3.53688
02-01-01-01-01-02-13.mp4	VO	Speech	Neutral	Normal	Kids	R2	A13	1	0.688199	3	2.8	1.47573	3.5	3.1	1.37032	10	1.98563	2.2468	1.64419	1.74306	1.24805	1.2356	3.20319
02-01-01-01-01-02-14.mp4	VO	Speech	Neutral	Normal	Kids	R2	A14	0.3	0.20646	3	2.8	1.31656	3	3.2	1.13529	3	2.50554	1.10562	1.98981	1.69737	0.679604	0.788932	3.33667
02-01-01-01-01-02-15.mp4	VO	Speech	Neutral	Normal	Kids	R2	A15	0.8	0.550559	3	3.4	0.843274	4	3.6	1.26491	8	1.7526	1.61531	1.80062	0.905997	0.785183	0.641586	3.43677
02-01-01-01-01-02-16.mp4	VO	Speech	Neutral	Normal	Kids	R2	A16	0.4	0.27528	3	2.7	1.25167	4	3.6	1.07497	4	2.00436	1.0807	1.78595	1.46998	1.43232	1.31263	3.73708
02-01-01-01-01-02-17.mp4	VO	Speech	Neutral	Normal	Kids	R2	A17	0.7	0.481739	3	2.9	1.28668	4	3.6	1.17379	7	1.8332	1.0087	1.96	1.13679	1.05359	0.763089	3.5035
02-01-01-01-01-02-18.mp4	VO	Speech	Neutral	Normal	Kids	R2	A18	1	0.688199	4	3.8	1.31656	4	4	1.24722	10	1.32981	0.885281	1.66647	1.16581	1.11974	0.973677	3.53688
02-01-01-01-01-02-19.mp4	VO	Speech	Neutral	Normal	Kids	R2	A19	0.8	0.550559	3	3.3	1.25167	4	3.8	1.31656	8	1.73179	1.31812	1.22433	1.03856	1.11294	1.14309	3.23656
02-01-01-01-01-02-20.mp4	VO	Speech	Neutral	Normal	Kids	R2	A20	0.9	0.619379	4	3.6	1.07497	4	3.8	1.0328	9	1.73688	1.43835	1.41845	0.963596	1.15029	0.945563	3.57023
02-01-01-01-01-02-21.mp4	VO	Speech	Neutral	Normal	Kids	R2	A21	0.9	0.619379	3.5	3.2	1.22927	4	3.5	0.971825	9	2.11389	1.90125	2.16768	1.05824	1.43809	0.844962	3.97063
02-01-01-01-01-02-22.mp4	VO	Speech	Neutral	Normal	Kids	R2	A22	1	0.688199	3	3.5	1.17851	3	2.8	1.31656	10	1.65418	1.3524	1.61012	1.70389	0.86768	0.569316	3.43677
02-01-01-01-01-02-23.mp4	VO	Speech	Neutral	Normal	Kids	R2	A23	1	0.688199	3.5	3.4	1.42984	4.5	4.1	1.19722	10	1.34116	0.794236	2.09543	1.47615	1.28507	0.744993	3.73706
02-01-01-01-01-02-24.mp4	VO	Speech	Neutral	Normal	Kids	R2	A24	0.7	0.481739	3	2.5	0.971825	3	2.7	1.25167	7	1.54434	1.4869	1.58292	1.33721	0.80972	0.452647	3.63696
02-01-01-01-02-01-01.mp4	VO	Speech	Neutral	Normal	Dogs	R1	A1	0.8	0.550559	3	3.2	1.47573	3	3.2	1.31656	8	1.26688	0.622819	2.29573	1.70104	1.34986	1.16354	3.26992
02-01-01-01-02-01-02.mp4	VO	Speech	Neutral	Normal	Dogs	R1	A2	0.9	0.619379	3.5	3.6	0.966092	4	3.9	0.737865	9	1.76499	1.94087	1.06888	0.670658	1.06944	1.06899	3.77042
02-01-01-01-02-01-03.mp4	VO	Speech	Neutral	Normal	Dogs	R1	A3	0.2	0.13764	4	3.2	1.13529	3.5	3.1	1.1005	2	2.79319	1.32023	2.56676	2.29172	1.32678	0.800156	3.5035
02-01-01-01-02-01-04.mp4	VO	Speech	Neutral	Normal	Dogs	R1	A4	0.7	0.481739	3.5	3.8	1.13529	4	3.9	1.28668	7	1.38391	0.896577	1.0904	0.870918	0.955659	0.652239	3.26994
02-01-01-01-02-01-05.mp4	VO	Speech	Neutral	Normal	Dogs	R1	A5	0.6	0.41292	3	3.2	1.13529	3.5	3.2	1.0328	6	3.30959	2.25221	1.34888	0.75885	1.09767	1.12622	3.10308
02-01-01-01-02-01-06.mp4	VO	Speech	Neutral	Normal	Dogs	R1	A6	0.8	0.550559	2.5	2.8	1.81353	3	3.1	1.79196	8	1.73112	1.91356	1.12719	1.024	0.3958	0.187233	3.4034
02-01-01-01-02-01-07.mp4	VO	Speech	Neutral	Normal	Dogs	R1	A7	0.8	0.550559	4	3.8	1.22927	4	3.9	1.19722	8	1.79241	2.02377	2.08189	1.42363	0.946648	0.9391	4.13746
02-01-01-01-02-01-08.mp4	VO	Speech	Neutral	Normal	Dogs	R1	A8	0.9	0.619379	3	2.9	1.28668	3	2.9	1.28668	9	1.56512	0.959715	1.8549	1.04225	0.870307	0.789648	3.53685
02-01-01-01-02-01-09.mp4	VO	Speech	Neutral	Normal	Dogs	R1	A9	0.6	0.41292	3	3.2	1.47573	3	3.4	1.17379	6	1.41808	1.25596	1.97836	1.60224	1.17629	1.23175	3.33667
02-01-01-01-02-01-10.mp4	VO	Speech	Neutral	Normal	Dogs	R1	A10	0.9	0.619379	2.5	2.6	1.17379	3	3	1.1547	9	1.769	1.40799	1.20846	0.796429	1.31721	1.45389	3.73706
02-01-01-01-02-01-11.mp4	VO	Speech	Neutral	Normal	Dogs	R1	A11	1	0.688199	3	3.3	1.33749	4	3.9	0.875595	10	1.56371	1.06271	1.20258	0.872998	0.931463	0.73103	3.20321
02-01-01-01-02-01-12.mp4	VO	Speech	Neutral	Normal	Dogs	R1	A12	0.9	0.619379	4	3.5	1.2693	3.5	3.5	1.17851	9	1.0958	0.589794	2.11405	1.56796	1.286	0.812293	3.6036
02-01-01-01-02-01-13.mp4	VO	Speech	Neutral	Normal	Dogs	R1	A13	0.9	0.619379	2.5	2.6	1.50555	3	3	1.1547	9	1.65152	0.984043	1.97126	1.20337	1.48705	1.1304	3.06973
02-01-01-01-02-01-14.mp4	VO	Speech	Neutral	Normal	Dogs	R1	A14	0.7	0.481739	3.5	3.2	1.22927	4	3.4	1.3499	7	3.60339	2.63263	1.37886	0.907741	0.617698	0.56367	3.47015
02-01-01-01-02-01-15.mp4	VO	Speech	Neutral	Normal	Dogs	R1	A15	1	0.688199	4	3.6	1.26491	3.5	3	1.41421	10	2.78619	2.5971	1.87323	1.30229	1.15708	0.913453	3.43675
02-01-01-01-02-01-16.mp4	VO	Speech	Neutral	Normal	Dogs	R1	A16	0.8	0.550559	3	3.2	1.47573	3	3.3	0.948683	8	2.699	1.79482	1.54433	1.33594	1.19412	0.803526	3.6036
02-01-01-01-02-01-17.mp4	VO	Speech	Neutral	Normal	Dogs	R1	A17	1	0.688199	4.5	3.9	1.59513	4	3.3	1.63639	10	1.65973	0.845373	1.98079	0.978446	0.882387	0.86987	3.5035
02-01-01-01-02-01-18.mp4	VO	Speech	Neutral	Normal	Dogs	R1	A18	0.8	0.550559	2.5	2.8	1.68655	3	2.7	1.63639	8	2.12164	1.52631	1.21114	1.07005	1.11892	0.9699	3.47012
02-01-01-01-02-01-19.mp4	VO	Speech	Neutral	Normal	Dogs	R1	A19	0.8	0.550559	4.5	4	1.24722	4	3.8	1.0328	8	1.61741	1.50188	1.2933	0.598653	1.15102	1.21754	3.33667
02-01-01-01-02-01-20.mp4	VO	Speech	Neutral	Normal	Dogs	R1	A20	0.7	0.481739	2.5	2.8	1.68655	3	2.8	1.68655	7	2.48411	2.4577	1.17203	1.01622	1.24264	1.54314	3.43677
02-01-01-01-02-01-21.mp4	VO	Speech	Neutral	Normal	Dogs	R1	A21	0.8	0.550559	3	3.1	1.59513	1.5	2.2	1.61933	8	1.70401	1.29807	2.00625	1.40706	1.05765	1.25455	3.6036
02-01-01-01-02-01-22.mp4	VO	Speech	Neutral	Normal	Dogs	R1	A22	1	0.688199	2.5	2.9	1.72884	3.5	3.4	1.42984	10	1.51956	1.19091	2.23888	2.08267	0.863244	0.774766	3.60358
02-01-01-01-02-01-23.mp4	VO	Speech	Neutral	Normal	Dogs	R1	A23	1	0.688199	3.5	3.2	1.47573	3	3	1.24722	10	1.32648	0.767567	1.43412	1.68112	0.791842	0.595856	3.67033
02-01-01-01-02-01-24.mp4	VO	Speech	Neutral	Normal	Dogs	R1	A24	0.6	0.41292	2.5	2.4	1.17379	3	3.1	0.567646	6	2.79999	1.944	2.36511	1.97858	1.32336	0.653212	3.63698
02-01-01-01-02-02-01.mp4	VO	Speech	Neutral	Normal	Dogs	R2	A1	1	0.688199	3	3	1.24722	4	3.5	0.971825	10	1.33021	0.732549	1.64715	1.61213	0.976553	0.754071	3.16983
02-01-01-01-02-02-02.mp4	VO	Speech	Neutral	Normal	Dogs	R2	A2	1	0.688199	3	2.8	1.47573	3	3	1.33333	10	1.73022	1.71866	1.91095	1.32752	1.01135	0.966928	3.60358
02-01-01-01-02-02-03.mp4	VO	Speech	Neutral	Normal	Dogs	R2	A3	0.6	0.41292	3	3	1.33333	3	2.9	1.59513	6	2.14836	1.42474	1.54245	0.658248	0.698154	0.511797	3.47015
02-01-01-01-02-02-04.mp4	VO	Speech	Neutral	Normal	Dogs	R2	A4	0.9	0.619379	3	3	1.24722	3	2.9	1.1005	9	2.00864	1.55394	1.32693	0.847953	0.679009	0.692525	3.23656
02-01-01-01-02-02-05.mp4	VO	Speech	Neutral	Normal	Dogs	R2	A5	0.9	0.619379	2.5	2.7	1.70294	4	3.3	1.49443	9	1.10995	0.840955	1.46677	1.3381	1.09641	0.943691	3.6036
02-01-01-01-02-02-06.mp4	VO	Speech	Neutral	Normal	Dogs	R2	A6	0.9	0.619379	3	2.7	0.823273	3.5	3.4	1.07497	9	1.84227	1.53144	1.90922	1.88879	0.926962	0.936467	3.43677
02-01-01-01-02-02-07.mp4	VO	Speech	Neutral	Normal	Dogs	R2	A7	1	0.688199	5	4.4	0.843274	5	4.3	1.33749	10	1.34972	0.529711	2.41988	1.65268	1.12075	0.636557	3.73706
02-01-01-01-02-02-08.mp4	VO	Speech	Neutral	Normal	Dogs	R2	A8	0.9	0.619379	3	3	1.41421	3	3.3	1.49443	9	1.46408	1.24328	1.6715	1.41081	0.876698	1.26062	3.5035
02-01-01-01-02-02-09.mp4	VO	Speech	Neutral	Normal	Dogs	R2	A9	0.7	0.481739	3	2.8	0.788811	3	2.9	0.875595	7	2.03067	1.44744	1.06075	0.559869	0.82242	0.731891	3.23658
02-01-01-01-02-02-10.mp4	VO	Speech	Neutral	Normal	Dogs	R2	A10	0.5	0.3441	2.5	2.6	1.26491	3	3	1.05409	5	2.03993	1.74833	1.45251	1.22089	1.22871	0.909702	3.67033
02-01-01-01-02-02-11.mp4	VO	Speech	Neutral	Normal	Dogs	R2	A11	0.9	0.619379	4	3.7	1.33749	4	4	0.816497	9	1.1627	1.17855	0.975112	0.668198	0.733989	0.662154	3.16983
02-01-01-01-02-02-12.mp4	VO	Speech	Neutral	Normal	Dogs	R2	A12	0.5	0.3441	2	2.4	1.07497	3.5	3.2	1.13529	5	1.8678	2.04979	1.81398	0.9608	1.86895	1.21763	3.63698
02-01-01-01-02-02-13.mp4	VO	Speech	Neutral	Normal	Dogs	R2	A13	0.9	0.619379	4	3.6	1.17379	4	4	0.816497	9	1.21101	0.815608	1.38229	1.40466	1.09734	1.22781	3.13646
02-01-01-01-02-02-14.mp4	VO	Speech	Neutral	Normal	Dogs	R2	A14	1	0.688199	2.5	2.5	1.08012	2.5	2.6	0.699206	10	2.2411	1.78525	2.34765	1.3668	1.63473	1.3908	3.57023
02-01-01-01-02-02-15.mp4	VO	Speech	Neutral	Normal	Dogs	R2	A15	0.8	0.550559	2	2.5	1.64992	3.5	3.4	1.64655	8	1.85649	1.51757	1.69999	1.18239	0.966795	0.504172	3.4034
02-01-01-01-02-02-16.mp4	VO	Speech	Neutral	Normal	Dogs	R2	A16	0.6	0.41292	2.5	2.7	1.33749	3.5	3.4	1.26491	6	1.46368	0.851517	1.41297	1.04178	0.587068	0.38039	3.57023
02-01-01-01-02-02-17.mp4	VO	Speech	Neutral	Normal	Dogs	R2	A17	0.8	0.550559	4	3.9	1.19722	4.5	4.2	1.0328	8	1.50772	1.00564	2.27893	1.71944	1.3163	0.975987	3.47012
02-01-01-01-02-02-18.mp4	VO	Speech	Neutral	Normal	Dogs	R2	A18	0.8	0.550559	3	3.3	1.49443	3	3.3	1.49443	8	2.2185	1.69356	1.25697	0.735591	0.85905	0.768859	3.47015
02-01-01-01-02-02-19.mp4	VO	Speech	Neutral	Normal	Dogs	R2	A19	0.9	0.619379	3.5	3.3	1.41814	3	3.1	1.44914	9	1.56656	0.979799	1.80625	1.12477	1.14195	0.44283	3.30329
02-01-01-01-02-02-20.mp4	VO	Speech	Neutral	Normal	Dogs	R2	A20	0.8	0.550559	3	2.9	1.1005	3	3.1	0.875595	8	2.21635	2.00292	1.51323	0.767389	1.36824	1.12977	3.53688
02-01-01-01-02-02-21.mp4	VO	Speech	Neutral	Normal	Dogs	R2	A21	0.8	0.550559	3.5	3.3	1.70294	3.5	3.4	1.64655	8	2.10415	2.65629	1.17963	0.975022	1.07195	0.890208	3.67033
02-01-01-01-02-02-22.mp4	VO	Speech	Neutral	Normal	Dogs	R2	A22	1	0.688199	3	3.1	1.59513	4	3.7	1.49443	10	1.28876	0.959481	0.937971	0.463137	0.61274	0.573766	3.53685
02-01-01-01-02-02-23.mp4	VO	Speech	Neutral	Normal	Dogs	R2	A23	1	0.688199	3	3	1.41421	3	2.9	1.52388	10	1.23233	0.77992	1.93958	1.80574	0.950697	0.965087	3.83717
02-01-01-01-02-02-24.mp4	VO	Speech	Neutral	Normal	Dogs	R2	A24	0.7	0.481739	2	2.2	1.39841	3	3.1	1.44914	7	2.53666	1.45521	1.96676	2.00541	1.105	1.01662	3.6036
02-01-02-01-01-01-01.mp4	VO	Speech	Calm	Normal	Kids	R1	A1	0.8	0.550559	3	2.9	1.37032	4	4	0.816497	5.52	2.82519	2.46667	1.74977	0.937628	1.19806	1.04641	3.53685
02-01-02-01-01-01-02.mp4	VO	Speech	Calm	Normal	Kids	R1	A2	0.7	0.481739	2.5	2.9	1.28668	3	3.2	1.13529	4.27	1.91041	1.37332	1.94201	1.88097	0.56221	0.681306	3.83717
02-01-02-01-01-01-03.mp4	VO	Speech	Calm	Normal	Kids	R1	A3	0.2	0.13764	4	3.8	0.788811	4	3.8	0.918937	1.52	2.38458	2.14256	2.2568	1.8516	0.792004	0.766759	3.83717
02-01-02-01-01-01-04.mp4	VO	Speech	Calm	Normal	Kids	R1	A4	0	0	3.5	3.4	0.699206	3	2.8	1.47573	0	2.25596	1.91201	1.16797	0.89917	0.821085	0.773903	3.80379
02-01-02-01-01-01-05.mp4	VO	Speech	Calm	Normal	Kids	R1	A5	0.1	0.0688199	3.5	3.4	0.699206	4	3.4	1.17379	0.68	1.78047	0.680227	1.43674	0.938043	1.08136	0.913255	4.03735
02-01-02-01-01-01-06.mp4	VO	Speech	Calm	Normal	Kids	R1	A6	0.8	0.550559	3	3.1	0.875595	3	2.9	1.1005	4.8	2.11763	0.808787	2.6157	1.48131	1.54772	1.3005	4.03735
02-01-02-01-01-01-07.mp4	VO	Speech	Calm	Normal	Kids	R1	A7	0.5	0.3441	3.5	3.5	1.08012	4	3.6	1.26491	3.55	1.77393	0.949051	1.03762	0.563727	1.01802	1.00093	3.47012
02-01-02-01-01-01-08.mp4	VO	Speech	Calm	Normal	Kids	R1	A8	0.5	0.3441	3	3.3	1.05935	3.5	3.4	0.966092	3.35	2.252	1.65338	2.3186	1.94359	1.0617	0.864834	3.6036
02-01-02-01-01-01-09.mp4	VO	Speech	Calm	Normal	Kids	R1	A9	0.7	0.481739	4	3.8	1.31656	4	3.6	0.843274	5.18	1.73474	1.46465	1.64721	0.692251	1.10619	0.898953	3.33667
02-01-02-01-01-01-10.mp4	VO	Speech	Calm	Normal	Kids	R1	A10	0.6	0.41292	3	2.6	0.843274	3	3.1	0.567646	3.42	2.62859	1.47424	2.40687	1.15046	1.1722	0.795679	3.57023
02-01-02-01-01-01-11.mp4	VO	Speech	Calm	Normal	Kids	R1	A11	0.7	0.481739	3	3.4	1.07497	4	3.8	0.788811	5.04	2.07319	1.32801	1.35388	1.04447	0.483657	0.287839	3.26992
02-01-02-01-01-01-12.mp4	VO	Speech	Calm	Normal	Kids	R1	A12	0.9	0.619379	3	3.2	1.31656	4	3.7	0.674949	6.21	2.77902	1.92837	2.60562	2.58457	0.967223	0.61674	3.87052
02-01-02-01-01-01-13.mp4	VO	Speech	Calm	Normal	Kids	R1	A13	0.7	0.481739	3	2.8	1.54919	3.5	3.1	1.1005	4.13	2.84295	2.25488	1.46818	0.666284	1.01914	0.651586	3.30329
02-01-02-01-01-01-14.mp4	VO	Speech	Calm	Normal	Kids	R1	A14	0.6	0.41292	4	3.4	1.26491	4	3.8	0.918937	4.32	2.78367	2.42493	1.65429	1.0585	1.09717	0.783828	3.73706
02-01-02-01-01-01-15.mp4	VO	Speech	Calm	Normal	Kids	R1	A15	0.8	0.550559	3	2.8	1.22927	3	3.6	1.07497	5.12	2.08713	1.09041	1.86342	1.47828	0.780077	0.616966	3.57025
02-01-02-01-01-01-16.mp4	VO	Speech	Calm	Normal	Kids	R1	A16	0.2	0.13764	3.5	3.5	1.2693	4	3.9	0.737865	1.48	2.15532	1.53295	1.21976	0.604558	0.876073	0.769152	3.70369
02-01-02-01-01-01-17.mp4	VO	Speech	Calm	Normal	Kids	R1	A17	0.8	0.550559	3	3.1	1.28668	3.5	3.8	0.918937	5.52	2.30391	1.99862	1.68271	1.02727	1.20981	0.89043	3.5035
02-01-02-01-01-01-18.mp4	VO	Speech	Calm	Normal	Kids	R1	A18	0.6	0.41292	3	2.9	1.1005	3	3.2	0.918937	3.66	1.58031	0.940866	1.34093	0.616718	0.96878	0.53159	3.47012
02-01-02-01-01-01-19.mp4	VO	Speech	Calm	Normal	Kids	R1	A19	0.6	0.41292	4	3.9	0.737865	3	3.4	0.699206	4.38	2.22327	2.14457	2.10173	0.923281	0.872757	0.52182	3.67033
02-01-02-01-01-01-20.mp4	VO	Speech	Calm	Normal	Kids	R1	A20	0.8	0.550559	4	3.6	1.07497	3.5	3.2	1.47573	5.44	2.29524	1.30543	2.01161	1.51588	0.645156	0.297618	3.63696
02-01-02-01-01-01-21.mp4	VO	Speech	Calm	Normal	Kids	R1	A21	0.5	0.3441	3	2.7	0.823273	3	2.9	1.19722	2.8	2.73409	1.91871	1.82101	0.992619	1.15514	0.705219	4.03737
02-01-02-01-01-01-22.mp4	VO	Speech	Calm	Normal	Kids	R1	A22	0.9	0.619379	3.5	3.4	1.07497	3	3.4	0.966092	6.12	2.1447	1.50757	2.01664	1.41689	1.10038	0.926436	3.53685
02-01-02-01-01-01-23.mp4	VO	Speech	Calm	Normal	Kids	R1	A23	1	0.688199	4	3.7	0.674949	4	3.7	0.674949	7.4	2.16775	1.43356	1.95189	1.09912	1.27708	1.11565	3.97063
02-01-02-01-01-01-24.mp4	VO	Speech	Calm	Normal	Kids	R1	A24	0.6	0.41292	3	3.3	1.05935	3	3.2	1.13529	3.9	1.85941	0.720015	1.54231	0.575691	1.20048	1.27683	3.57023
02-01-02-01-01-02-01.mp4	VO	Speech	Calm	Normal	Kids	R2	A1	0.9	0.619379	3	3	1.05409	4	3.9	0.994429	6.21	1.04024	0.525729	1.33317	1.04484	0.766616	0.535449	3.60358
02-01-02-01-01-02-02.mp4	VO	Speech	Calm	Normal	Kids	R2	A2	0.9	0.619379	3.5	3.3	1.33749	4	3.7	0.948683	6.3	2.07885	1.783	1.46942	0.676644	1.23377	0.965484	4.004
02-01-02-01-01-02-03.mp4	VO	Speech	Calm	Normal	Kids	R2	A3	0.2	0.13764	3	3.1	0.875595	3	3	1.1547	1.22	2.00239	0.697571	1.77056	1.19687	0.815725	0.703353	3.73706
02-01-02-01-01-02-04.mp4	VO	Speech	Calm	Normal	Kids	R2	A4	0.5	0.3441	3.5	3.4	1.17379	3.5	3.8	1.13529	3.6	1.75561	1.41012	1.40985	0.785334	0.700168	0.414385	3.73706
02-01-02-01-01-02-05.mp4	VO	Speech	Calm	Normal	Kids	R2	A5	0.8	0.550559	3	3.8	1.0328	3	3.2	1.22927	5.6	2.82623	2.19189	2.14888	1.64525	1.13423	1.38034	4.1041
02-01-02-01-01-02-06.mp4	VO	Speech	Calm	Normal	Kids	R2	A6	0.8	0.550559	3	2.8	1.47573	4	3.5	1.50923	5.04	1.59697	1.06516	1.10395	0.772759	0.687849	0.534046	4.1041
02-01-02-01-01-02-07.mp4	VO	Speech	Calm	Normal	Kids	R2	A7	0.6	0.41292	3	3.1	0.994429	3	3.4	1.17379	3.9	1.77396	1.41408	1.68414	0.720978	1.00501	0.693626	3.73706
02-01-02-01-01-02-08.mp4	VO	Speech	Calm	Normal	Kids	R2	A8	0.5	0.3441	3.5	3.2	1.31656	3.5	3.6	0.966092	3.4	1.7159	1.34567	1.30003	0.576557	0.736834	0.717639	3.40342
02-01-02-01-01-02-09.mp4	VO	Speech	Calm	Normal	Kids	R2	A9	0.8	0.550559	3.5	3.3	1.1595	4	3.7	1.05935	5.6	1.72695	0.817482	1.74128	0.740769	0.770535	0.602314	3.33667
02-01-02-01-01-02-10.mp4	VO	Speech	Calm	Normal	Kids	R2	A10	0.3	0.20646	3.5	3.3	1.05935	3.5	3.6	0.699206	2.07	2.37447	1.50044	2.06087	1.12894	1.3275	0.595186	3.60358
02-01-02-01-01-02-11.mp4	VO	Speech	Calm	Normal	Kids	R2	A11	0.2	0.13764	2.5	2.7	1.05935	4	3.7	0.948683	1.28	2.97205	1.61646	0.948439	0.861611	0.963968	0.949777	3.33667
02-01-02-01-01-02-12.mp4	VO	Speech	Calm	Normal	Kids	R2	A12	1	0.688199	3.5	3.3	1.56702	3.5	3.6	1.42984	6.9	2.24969	1.87944	1.24728	0.834401	0.942004	1.00856	3.77042
02-01-02-01-01-02-13.mp4	VO	Speech	Calm	Normal	Kids	R2	A13	0.8	0.550559	3	2.7	0.948683	3.5	3.7	0.823273	5.12	2.45059	1.71421	0.932664	0.635849	1.09667	0.801067	3.16983
02-01-02-01-01-02-14.mp4	VO	Speech	Calm	Normal	Kids	R2	A14	0.7	0.481739	3	3.2	0.788811	3	3.3	1.1595	4.55	3.15776	2.29059	2.38017	1.38106	0.806752	0.555932	3.57023
02-01-02-01-01-02-15.mp4	VO	Speech	Calm	Normal	Kids	R2	A15	0.7	0.481739	3	2.6	1.07497	3	2.6	1.26491	3.64	2.18269	0.898652	1.34167	1.53614	0.893459	0.573969	3.57023
02-01-02-01-01-02-16.mp4	VO	Speech	Calm	Normal	Kids	R2	A16	0.4	0.27528	3.5	3.3	1.33749	4	3.5	1.35401	2.72	1.45533	0.786366	1.62411	0.814867	1.08183	1.08646	3.87052
02-01-02-01-01-02-17.mp4	VO	Speech	Calm	Normal	Kids	R2	A17	1	0.688199	2.5	2.6	1.17379	3	3.2	1.0328	5.8	2.19058	2.54715	1.65924	0.804855	1.02102	1.07682	3.53688
02-01-02-01-01-02-18.mp4	VO	Speech	Calm	Normal	Kids	R2	A18	0.1	0.0688199	3	3.1	0.994429	3	2.7	1.33749	0.58	2.01853	1.09768	1.19801	1.3023	0.656579	0.68286	3.40342
02-01-02-01-01-02-19.mp4	VO	Speech	Calm	Normal	Kids	R2	A19	0.3	0.20646	4	3.6	1.07497	4	3.7	0.948683	2.19	1.89728	1.01514	2.11669	2.21429	0.490107	0.46265	3.67033
02-01-02-01-01-02-20.mp4	VO	Speech	Calm	Normal	Kids	R2	A20	0.4	0.27528	3	3.2	1.47573	3.5	3.7	1.05935	2.76	1.90921	0.624473	1.2515	0.755291	1.08614	0.642783	3.57023
02-01-02-01-01-02-21.mp4	VO	Speech	Calm	Normal	Kids	R2	A21	0.6	0.41292	3	3.1	1.1005	3	3.2	0.918937	3.78	1.66302	0.92369	1.16905	1.1498	0.792062	0.633778	4.004
02-01-02-01-01-02-22.mp4	VO	Speech	Calm	Normal	Kids	R2	A22	0.9	0.619379	2	2.6	1.17379	3	3	1.49071	5.04	2.05912	1.34728	1.92205	1.45585	1.00917	0.625983	3.57023
02-01-02-01-01-02-23.mp4	VO	Speech	Calm	Normal	Kids	R2	A23	0.9	0.619379	3	3.5	0.971825	3	3.5	1.2693	6.3	2.0634	1.17449	1.94255	1.55517	1.11231	0.906008	4.07073
02-01-02-01-01-02-24.mp4	VO	Speech	Calm	Normal	Kids	R2	A24	0.4	0.27528	3	2.7	0.823273	3	3	1.33333	2.28	1.89592	1.15366	1.67278	1.00066	0.877188	0.830065	3.5035
02-01-02-01-02-01-01.mp4	VO	Speech	Calm	Normal	Dogs	R1	A1	0.8	0.550559	2.5	2.9	1.59513	4	3.7	1.41814	5.28	1.98861	1.93074	2.17789	1.8907	0.891546	0.74403	3.5035
02-01-02-01-02-01-02.mp4	VO	Speech	Calm	Normal	Dogs	R1	A2	0.7	0.481739	3	3	1.05409	3	2.9	1.1005	4.13	2.1727	1.10065	1.93698	1.89974	1.11938	0.944208	3.83717
02-01-02-01-02-01-03.mp4	VO	Speech	Calm	Normal	Dogs	R1	A3	0.1	0.0688199	3	2.9	1.1005	3	3	0.666667	0.59	3.23233	1.52299	2.00426	1.44094	1.73927	0.916768	3.83717
02-01-02-01-02-01-04.mp4	VO	Speech	Calm	Normal	Dogs	R1	A4	0.2	0.13764	4	3.5	0.971825	4	3.7	0.674949	1.44	2.47923	1.65768	1.63199	0.99679	1.62332	1.37309	3.63698
02-01-02-01-02-01-05.mp4	VO	Speech	Calm	Normal	Dogs	R1	A5	0.2	0.13764	3	3.4	1.3499	4	3.7	0.948683	1.42	1.47734	0.49756	1.47017	0.384694	1.1015	1.01036	4.13748
02-01-02-01-02-01-06.mp4	VO	Speech	Calm	Normal	Dogs	R1	A6	0.8	0.550559	3	2.9	1.1005	3	2.7	1.1595	4.48	2.88072	2.39864	1.49866	1.19207	0.860592	0.720048	3.97063
02-01-02-01-02-01-07.mp4	VO	Speech	Calm	Normal	Dogs	R1	A7	0.8	0.550559	3	2.8	1.47573	3	3.2	1.13529	4.8	1.33509	0.769307	1.81243	1.39855	0.747682	0.543222	3.5035
02-01-02-01-02-01-08.mp4	VO	Speech	Calm	Normal	Dogs	R1	A8	0.7	0.481739	4	3.6	1.3499	4	4	0.666667	5.32	2.05903	1.23139	1.42188	0.807475	0.629612	0.35177	3.47012
02-01-02-01-02-01-09.mp4	VO	Speech	Calm	Normal	Dogs	R1	A9	0.8	0.550559	3	3.2	1.47573	3	2.8	1.13529	4.8	1.98398	1.18871	1.35962	0.838219	0.767913	0.563469	3.47015
02-01-02-01-02-01-10.mp4	VO	Speech	Calm	Normal	Dogs	R1	A10	0.2	0.13764	3	3.4	0.966092	4	3.7	0.948683	1.42	2.96676	1.57803	1.31782	0.58428	1.16564	1.17641	3.63696
02-01-02-01-02-01-11.mp4	VO	Speech	Calm	Normal	Dogs	R1	A11	0.6	0.41292	3	3.2	1.31656	3	3.1	0.567646	3.78	1.19802	0.580227	1.70062	1.79166	1.07712	0.903578	3.33667
02-01-02-01-02-01-12.mp4	VO	Speech	Calm	Normal	Dogs	R1	A12	0.7	0.481739	3.5	3.6	1.17379	4	3.9	0.994429	5.25	1.69685	1.15713	1.07673	0.774063	0.989941	1.09253	3.77044
02-01-02-01-02-01-13.mp4	VO	Speech	Calm	Normal	Dogs	R1	A13	0.5	0.3441	3	3	1.05409	3	3.4	1.17379	3.2	2.15069	1.46578	1.19818	0.923708	0.602934	0.477626	3.13646
02-01-02-01-02-01-14.mp4	VO	Speech	Calm	Normal	Dogs	R1	A14	0.8	0.550559	4	3.7	1.1595	4	3.8	1.13529	6	1.82238	1.0452	1.78967	0.9906	1.12322	0.922029	3.40342
02-01-02-01-02-01-15.mp4	VO	Speech	Calm	Normal	Dogs	R1	A15	1	0.688199	3	3.2	1.39841	3.5	3.2	1.39841	6.4	1.65098	0.912094	1.40109	0.571361	0.425331	0.260825	3.73706
02-01-02-01-02-01-16.mp4	VO	Speech	Calm	Normal	Dogs	R1	A16	0.5	0.3441	3	3.1	1.19722	4	4	1.05409	3.55	1.87499	0.980849	1.42721	0.959145	1.00359	0.810952	3.80379
02-01-02-01-02-01-17.mp4	VO	Speech	Calm	Normal	Dogs	R1	A17	0.8	0.550559	3	2.7	0.948683	3	3	1.1547	4.56	2.33798	1.77721	1.53081	1.16794	0.816455	0.637082	3.73708
02-01-02-01-02-01-18.mp4	VO	Speech	Calm	Normal	Dogs	R1	A18	0.4	0.27528	3	3.3	1.1595	4	3.5	1.17851	2.72	2.18143	1.35275	1.65992	1.42908	0.8357	0.852856	3.63698
02-01-02-01-02-01-19.mp4	VO	Speech	Calm	Normal	Dogs	R1	A19	0.5	0.3441	3.5	3.2	1.13529	3.5	3.5	0.849837	3.35	2.82273	1.76472	1.74218	0.898335	1.24357	0.891218	3.33667
02-01-02-01-02-01-20.mp4	VO	Speech	Calm	Normal	Dogs	R1	A20	0.7	0.481739	3	3.2	1.0328	4	4.2	0.918937	5.18	2.08398	1.78206	1.9844	1.87913	0.565845	0.431123	3.33667
02-01-02-01-02-01-21.mp4	VO	Speech	Calm	Normal	Dogs	R1	A21	0.6	0.41292	2.5	2.6	0.699206	3	2.9	0.875595	3.3	2.5747	2.20357	2.02903	1.43567	0.621624	0.546408	3.80381
02-01-02-01-02-01-22.mp4	VO	Speech	Calm	Normal	Dogs	R1	A22	0.5	0.3441	2.5	2.5	0.849837	2	2.6	1.42984	2.55	2.00473	1.04657	1.6024	1.05905	1.22235	0.793025	3.57023
02-01-02-01-02-01-23.mp4	VO	Speech	Calm	Normal	Dogs	R1	A23	0.9	0.619379	4	4.1	0.875595	4	4	1.1547	7.29	1.46436	0.607266	1.69048	1.73691	0.670287	0.316323	4.17083
02-01-02-01-02-01-24.mp4	VO	Speech	Calm	Normal	Dogs	R1	A24	1	0.688199	3	3.3	0.483046	3	3.4	0.843274	6.7	1.86183	1.75276	1.77512	1.43132	1.33679	1.04971	3.87054
02-01-02-01-02-02-01.mp4	VO	Speech	Calm	Normal	Dogs	R2	A1	0.7	0.481739	3	3.1	1.28668	4	4.2	0.788811	5.11	2.71138	1.429	1.98837	1.11156	1.0757	0.672569	3.47015
02-01-02-01-02-02-02.mp4	VO	Speech	Calm	Normal	Dogs	R2	A2	0.9	0.619379	3.5	3.3	0.823273	4	3.6	0.843274	6.21	1.78323	0.717831	1.50192	1.05387	0.790728	0.510653	3.97063
02-01-02-01-02-02-03.mp4	VO	Speech	Calm	Normal	Dogs	R2	A3	0.3	0.20646	3	2.7	0.823273	3	2.7	0.823273	1.62	2.12309	1.16555	1.00517	0.803593	0.395911	0.258771	3.97063
02-01-02-01-02-02-04.mp4	VO	Speech	Calm	Normal	Dogs	R2	A4	0.5	0.3441	4	3.6	1.07497	3	3.5	0.971825	3.55	2.52635	1.04208	2.34633	1.74177	0.823464	0.709055	3.57025
02-01-02-01-02-02-05.mp4	VO	Speech	Calm	Normal	Dogs	R2	A5	0.2	0.13764	3	3.3	0.823273	4	3.9	0.567646	1.44	1.80911	0.625815	1.51526	0.938099	1.01433	0.707095	4.23756
02-01-02-01-02-02-06.mp4	VO	Speech	Calm	Normal	Dogs	R2	A6	0.9	0.619379	3	3.1	1.44914	3	3.1	0.994429	5.58	1.52532	1.04215	2.08958	2.15905	0.786191	0.471217	4.20419
02-01-02-01-02-02-07.mp4	VO	Speech	Calm	Normal	Dogs	R2	A7	0.7	0.481739	3.5	3.5	0.849837	3.5	3.5	1.17851	4.9	1.6718	0.659615	1.93781	1.45184	1.10138	0.992786	3.53688
02-01-02-01-02-02-08.mp4	VO	Speech	Calm	Normal	Dogs	R2	A8	0.3	0.20646	3.5	3.3	1.33749	4	3.9	0.875595	2.16	1.1992	0.447638	2.14531	1.77471	0.936577	0.433046	3.47012
02-01-02-01-02-02-09.mp4	VO	Speech	Calm	Normal	Dogs	R2	A9	0.7	0.481739	1.5	1.9	1.1005	3.5	3.1	1.52388	3.5	2.63912	1.1226	2.04102	1.68418	1.30515	0.615711	3.57023
02-01-02-01-02-02-10.mp4	VO	Speech	Calm	Normal	Dogs	R2	A10	0.5	0.3441	3.5	3.5	1.08012	3	3.2	1.22927	3.35	2.49638	1.57561	1.70958	1.35853	1.36463	1.24244	3.70371
02-01-02-01-02-02-11.mp4	VO	Speech	Calm	Normal	Dogs	R2	A11	0.9	0.619379	3.5	3.7	0.823273	4	3.8	0.788811	6.75	2.09108	2.23177	1.88815	1.41453	1.09159	0.744592	3.67033
02-01-02-01-02-02-12.mp4	VO	Speech	Calm	Normal	Dogs	R2	A12	1	0.688199	3	3.4	1.07497	3	3.4	1.07497	6.8	2.88342	1.78042	1.59029	1.26575	0.698381	0.605912	3.67033
02-01-02-01-02-02-13.mp4	VO	Speech	Calm	Normal	Dogs	R2	A13	0.7	0.481739	1.5	2.1	1.37032	2.5	2.9	1.59513	3.5	2.00958	1.67838	1.17976	0.81747	1.36166	1.00452	2.93627
02-01-02-01-02-02-14.mp4	VO	Speech	Calm	Normal	Dogs	R2	A14	0.6	0.41292	3	3.4	0.516398	3.5	3.3	1.1595	4.02	3.34148	1.61652	1.30472	0.573694	0.796433	0.724994	3.5035
02-01-02-01-02-02-15.mp4	VO	Speech	Calm	Normal	Dogs	R2	A15	1	0.688199	3	2.9	0.875595	4	3.7	0.674949	6.6	1.78924	0.583273	2.61325	1.94553	1.86142	1.41908	3.57023
02-01-02-01-02-02-16.mp4	VO	Speech	Calm	Normal	Dogs	R2	A16	0.5	0.3441	3	3.1	0.567646	4.5	4.1	0.994429	3.6	1.78592	0.825162	1.61014	0.938214	0.99917	1.01381	3.67033
02-01-02-01-02-02-17.mp4	VO	Speech	Calm	Normal	Dogs	R2	A17	1	0.688199	3	3.2	1.39841	3	3.1	1.28668	6.3	1.36402	1.25644	1.25357	0.700452	0.848794	0.66056	3.77044
02-01-02-01-02-02-18.mp4	VO	Speech	Calm	Normal	Dogs	R2	A18	0.4	0.27528	2.5	3	1.1547	4	3.6	1.17379	2.64	1.61612	0.596064	1.03136	0.523035	0.817235	0.402462	3.5035
02-01-02-01-02-02-19.mp4	VO	Speech	Calm	Normal	Dogs	R2	A19	0.2	0.13764	3.5	3.7	1.05935	4.5	3.9	1.28668	1.52	2.0323	0.803231	1.94577	1.59986	1.23422	0.91359	3.47012
02-01-02-01-02-02-20.mp4	VO	Speech	Calm	Normal	Dogs	R2	A20	1	0.688199	3	3.2	1.13529	4	3.9	0.994429	7.1	3.28918	1.7872	1.93558	1.24842	1.4387	1.12076	3.5035
02-01-02-01-02-02-21.mp4	VO	Speech	Calm	Normal	Dogs	R2	A21	0.4	0.27528	3	3.1	0.875595	3	3.2	0.788811	2.52	1.50386	1.47061	1.10375	0.596428	1.1194	1.06569	4.07073
02-01-02-01-02-02-22.mp4	VO	Speech	Calm	Normal	Dogs	R2	A22	0.4	0.27528	3	2.7	0.948683	3	3.3	1.25167	2.4	2.894	2.58899	1.17402	1.01255	0.768396	0.715724	3.53688
02-01-02-01-02-02-23.mp4	VO	Speech	Calm	Normal	Dogs	R2	A23	1	0.688199	3	3.1	1.44914	4	3.6	1.17379	6.7	1.16818	0.650247	1.08831	0.842206	0.809225	0.693502	4.004
02-01-02-01-02-02-24.mp4	VO	Speech	Calm	Normal	Dogs	R2	A24	0.2	0.13764	2.5	2.7	1.05935	3	3.1	1.28668	1.16	2.27099	1.25796	1.89821	1.11039	1.14354	0.676335	3.70369
02-01-02-02-01-01-01.mp4	VO	Speech	Calm	Strong	Kids	R1	A1	0.7	0.481739	3.5	3.2	1.22927	4	3.8	0.918937	4.9	2.37731	1.31691	1.61059	1.15827	1.48627	1.27168	3.70371
02-01-02-02-01-01-02.mp4	VO	Speech	Calm	Strong	Kids	R1	A2	0.7	0.481739	2	2.4	0.843274	3	2.9	0.737865	3.71	1.84895	0.686501	1.88037	0.593333	0.988071	0.964814	4.13748
02-01-02-02-01-01-03.mp4	VO	Speech	Calm	Strong	Kids	R1	A3	0.4	0.27528	3	3.2	1.0328	2.5	2.8	1.22927	2.4	1.94637	0.97316	1.94617	0.976119	1.25403	0.890405	4.03737
02-01-02-02-01-01-04.mp4	VO	Speech	Calm	Strong	Kids	R1	A4	0.8	0.550559	4	4	0.942809	3.5	3.5	1.35401	6	2.90634	1.93972	2.44584	1.95887	1.98493	1.52329	3.97063
02-01-02-02-01-01-05.mp4	VO	Speech	Calm	Strong	Kids	R1	A5	0.2	0.13764	3.5	3.7	1.05935	3.5	3.5	1.35401	1.44	2.62389	2.47748	1.79015	1.42206	0.897443	0.765877	4.73806
02-01-02-02-01-01-06.mp4	VO	Speech	Calm	Strong	Kids	R1	A6	0.8	0.550559	3	3.2	0.788811	3.5	3.7	1.05935	5.52	1.63456	0.879584	1.40684	1.16629	0.762549	0.732289	4.5045
02-01-02-02-01-01-07.mp4	VO	Speech	Calm	Strong	Kids	R1	A7	0.8	0.550559	4	3.7	1.05935	4	3.9	0.567646	6.08	1.79329	1.06163	1.70043	1.28985	1.01076	0.564373	4.004
02-01-02-02-01-01-08.mp4	VO	Speech	Calm	Strong	Kids	R1	A8	0.5	0.3441	4	4.1	0.875595	4	3.9	1.19722	4	2.4979	1.94364	1.47547	0.798883	0.779529	0.978988	3.63696
02-01-02-02-01-01-09.mp4	VO	Speech	Calm	Strong	Kids	R1	A9	0.8	0.550559	3	2.9	1.1005	4	3.7	1.1595	5.28	3.0178	2.20487	1.69891	1.2697	1.08753	0.821535	3.33667
02-01-02-02-01-01-10.mp4	VO	Speech	Calm	Strong	Kids	R1	A10	0.7	0.481739	3	2.8	0.788811	3	3.4	0.843274	4.34	3.08732	1.7297	2.65934	2.06117	1.82536	1.38004	3.73706
02-01-02-02-01-01-11.mp4	VO	Speech	Calm	Strong	Kids	R1	A11	0.9	0.619379	3	3.2	1.47573	3	2.8	1.54919	5.4	2.02205	1.97541	1.23128	0.824523	0.8249	0.479696	3.83717
02-01-02-02-01-01-12.mp4	VO	Speech	Calm	Strong	Kids	R1	A12	0.8	0.550559	3.5	3.3	1.70294	4	3.6	1.26491	5.52	2.21815	1.5553	1.69805	1.16719	0.875573	0.681255	3.97063
02-01-02-02-01-01-13.mp4	VO	Speech	Calm	Strong	Kids	R1	A13	0.4	0.27528	2	2.6	1.07497	3	3.3	0.948683	2.36	3.36127	2.65789	1.74377	1.23769	0.758068	0.405208	3.13648
02-01-02-02-01-01-14.mp4	VO	Speech	Calm	Strong	Kids	R1	A14	0.9	0.619379	3	3.3	1.25167	4	3.5	1.2693	6.12	2.19774	1.38637	1.68542	1.16685	0.761924	0.51991	3.87052
02-01-02-02-01-01-15.mp4	VO	Speech	Calm	Strong	Kids	R1	A15	0.8	0.550559	3	2.9	1.19722	3	3.2	1.13529	4.88	2.27333	1.54646	1.16273	0.713524	1.06375	1.09255	3.67033
02-01-02-02-01-01-16.mp4	VO	Speech	Calm	Strong	Kids	R1	A16	0.2	0.13764	3	3.1	0.994429	3	2.9	1.19722	1.2	2.87035	1.32696	2.25958	1.42465	1.08382	0.822969	3.87052
02-01-02-02-01-01-17.mp4	VO	Speech	Calm	Strong	Kids	R1	A17	0.6	0.41292	2.5	2.8	0.918937	3	3	1.05409	3.48	2.63019	2.02924	2.2427	1.38467	0.832827	0.534305	3.87054
02-01-02-02-01-01-18.mp4	VO	Speech	Calm	Strong	Kids	R1	A18	0.4	0.27528	3.5	3.1	1.37032	3.5	3.4	1.17379	2.6	2.78713	1.51199	2.35005	1.21427	1.04352	0.400405	3.6036
02-01-02-02-01-01-19.mp4	VO	Speech	Calm	Strong	Kids	R1	A19	0.3	0.20646	3	3.4	0.843274	4	3.6	1.3499	2.1	2.19063	1.02088	1.79303	1.04156	1.54683	1.11829	4.47115
02-01-02-02-01-01-20.mp4	VO	Speech	Calm	Strong	Kids	R1	A20	0.5	0.3441	3	3.4	1.3499	4	3.6	1.26491	3.5	2.27216	2.22509	1.47414	0.780292	0.973134	0.657841	3.87054
02-01-02-02-01-01-21.mp4	VO	Speech	Calm	Strong	Kids	R1	A21	0.5	0.3441	3	2.8	0.918937	3	3	1.1547	2.9	1.97998	0.952087	2.11563	1.87441	0.945647	1.0742	4.004
02-01-02-02-01-01-22.mp4	VO	Speech	Calm	Strong	Kids	R1	A22	0.4	0.27528	3	3.2	0.632456	3	3	0.942809	2.48	1.57999	0.810972	1.57493	1.29669	0.694052	0.33309	3.70371
02-01-02-02-01-01-23.mp4	VO	Speech	Calm	Strong	Kids	R1	A23	0.9	0.619379	4	3.9	0.994429	4	3.6	1.07497	6.75	1.67068	0.753248	1.44705	0.975762	0.648181	0.53288	4.6046
02-01-02-02-01-01-24.mp4	VO	Speech	Calm	Strong	Kids	R1	A24	0.4	0.27528	3	3.5	0.971825	3.5	3.6	0.966092	2.84	1.76504	0.919316	1.48657	0.525986	0.923243	0.616189	4.1041
02-01-02-02-01-02-01.mp4	VO	Speech	Calm	Strong	Kids	R2	A1	0.8	0.550559	3	3.4	0.843274	3.5	3.2	1.22927	5.28	3.05517	1.91044	1.95358	1.2815	0.896048	0.833442	4.004
02-01-02-02-01-02-02.mp4	VO	Speech	Calm	Strong	Kids	R2	A2	0.8	0.550559	4	3.6	1.07497	4	3.2	1.39841	5.44	1.40648	0.889233	1.2047	0.908877	0.592108	0.481939	4.03737
02-01-02-02-01-02-03.mp4	VO	Speech	Calm	Strong	Kids	R2	A3	0	0	2.5	2.9	0.994429	3	3.2	1.13529	0	1.68783	0.754187	1.38815	1.31514	1.06368	1.1133	3.97065
02-01-02-02-01-02-04.mp4	VO	Speech	Calm	Strong	Kids	R2	A4	0.4	0.27528	3	3.1	0.994429	4	3.6	1.17379	2.68	1.66046	0.7903	1.86783	1.1603	1.29281	1.32799	3.80381
02-01-02-02-01-02-05.mp4	VO	Speech	Calm	Strong	Kids	R2	A5	0.5	0.3441	3	3.3	0.823273	4	3.9	0.875595	3.6	2.57648	1.70046	1.91548	2.2224	0.861912	0.99167	4.5045
02-01-02-02-01-02-06.mp4	VO	Speech	Calm	Strong	Kids	R2	A6	0.7	0.481739	3	3	0.942809	3	3	0.942809	4.2	1.43358	0.756351	1.77826	1.27209	1.20523	0.959178	4.63798
02-01-02-02-01-02-07.mp4	VO	Speech	Calm	Strong	Kids	R2	A7	0.9	0.619379	3	3.3	1.1595	3	3.4	0.843274	6.03	1.41073	0.539441	1.69715	0.794855	1.20407	0.72853	3.87054
02-01-02-02-01-02-08.mp4	VO	Speech	Calm	Strong	Kids	R2	A8	0.6	0.41292	3	3.4	1.26491	4	3.9	0.737865	4.38	2.46063	1.16194	1.62135	0.850426	0.933118	0.697328	3.73706
02-01-02-02-01-02-09.mp4	VO	Speech	Calm	Strong	Kids	R2	A9	0.7	0.481739	4	3.9	1.1005	3	3.1	1.37032	4.9	2.3449	1.63929	1.44572	0.990031	1.29034	1.31954	3.43677
02-01-02-02-01-02-10.mp4	VO	Speech	Calm	Strong	Kids	R2	A10	0.8	0.550559	4	3.4	0.843274	4	3.6	0.843274	5.6	2.1956	1.12975	1.71801	1.20618	0.622218	0.611415	3.73706
02-01-02-02-01-02-11.mp4	VO	Speech	Calm	Strong	Kids	R2	A11	0.5	0.3441	3.5	3.3	0.823273	3.5	3.3	1.33749	3.3	2.57486	2.28943	1.89221	1.19439	1.08969	0.948401	3.73708
02-01-02-02-01-02-12.mp4	VO	Speech	Calm	Strong	Kids	R2	A12	0.5	0.3441	2.5	2.4	0.966092	3	2.6	1.3499	2.5	2.60534	2.08601	1.63921	1.06898	0.911108	0.551282	3.77044
02-01-02-02-01-02-13.mp4	VO	Speech	Calm	Strong	Kids	R2	A13	0.7	0.481739	3.5	3.1	1.19722	3	3	1.33333	4.27	3.18756	2.04005	2.00127	1.88605	1.19076	1.03382	3.20321
02-01-02-02-01-02-14.mp4	VO	Speech	Calm	Strong	Kids	R2	A14	0.7	0.481739	3	3.4	1.50555	4	4	1.05409	5.18	1.67179	0.743858	1.37064	0.744595	0.876381	0.863429	3.9039
02-01-02-02-01-02-15.mp4	VO	Speech	Calm	Strong	Kids	R2	A15	0.7	0.481739	3	2.8	1.0328	3	2.7	0.823273	3.85	3.03251	1.74376	1.33335	1.10905	1.5476	1.15231	3.80381
02-01-02-02-01-02-16.mp4	VO	Speech	Calm	Strong	Kids	R2	A16	0.3	0.20646	3	3.4	0.843274	3	3.1	0.875595	1.95	1.60002	0.818307	1.87301	1.3084	0.809587	0.709153	3.93727
02-01-02-02-01-02-17.mp4	VO	Speech	Calm	Strong	Kids	R2	A17	0.8	0.550559	3.5	3.4	0.966092	4	3.7	1.05935	5.68	2.56987	2.5475	1.70084	1.85225	1.17326	1.38266	3.6036
02-01-02-02-01-02-18.mp4	VO	Speech	Calm	Strong	Kids	R2	A18	0.7	0.481739	2.5	2.8	1.22927	3.5	3.4	1.26491	4.34	2.21492	1.66982	1.13066	1.1439	1.13801	1.14696	3.6036
02-01-02-02-01-02-19.mp4	VO	Speech	Calm	Strong	Kids	R2	A19	0.2	0.13764	4	3.9	1.1005	3	3.2	1.22927	1.42	2.00774	0.902488	1.18605	0.589492	1.00826	0.953607	4.03737
02-01-02-02-01-02-20.mp4	VO	Speech	Calm	Strong	Kids	R2	A20	0.6	0.41292	4	3.7	0.674949	3	3.3	0.823273	4.2	3.02181	1.93778	1.9868	1.34592	1.11661	1.33413	4.07075
02-01-02-02-01-02-21.mp4	VO	Speech	Calm	Strong	Kids	R2	A21	0.5	0.3441	3	3.2	1.0328	3	3	1.24722	3.1	2.3331	2.31968	1.44391	1.07474	1.68013	1.48446	4.17083
02-01-02-02-01-02-22.mp4	VO	Speech	Calm	Strong	Kids	R2	A22	0.5	0.3441	3	3.6	1.07497	4	3.9	0.875595	3.75	1.39085	0.451999	1.4332	0.872934	1.0179	0.579565	3.83717
02-01-02-02-01-02-23.mp4	VO	Speech	Calm	Strong	Kids	R2	A23	1	0.688199	3	3.3	0.823273	3	3	1.56347	6.3	1.76903	1.0414	1.42506	0.973476	1.51668	1.18157	4.60458
02-01-02-02-01-02-24.mp4	VO	Speech	Calm	Strong	Kids	R2	A24	0.8	0.550559	3	3.2	0.788811	3	3.2	0.918937	5.12	3.18761	1.90604	2.00876	1.2958	1.0866	1.04416	4.07073
02-01-02-02-02-01-01.mp4	VO	Speech	Calm	Strong	Dogs	R1	A1	0.4	0.27528	3	3.1	1.19722	4	3.8	1.0328	2.76	1.84139	1.00355	2.16658	1.30774	1.65903	1.27905	4.20421
02-01-02-02-02-01-02.mp4	VO	Speech	Calm	Strong	Dogs	R1	A2	0.7	0.481739	3.5	2.8	1.39841	2.5	2.7	1.49443	3.85	3.03671	1.81328	2.4774	1.47039	1.05074	0.854998	4.1041
02-01-02-02-02-01-03.mp4	VO	Speech	Calm	Strong	Dogs	R1	A3	0	0	3	3.1	1.28668	3.5	3.1	1.52388	0	2.62726	1.08922	1.84293	1.08478	0.712484	0.669931	4.13746
02-01-02-02-02-01-04.mp4	VO	Speech	Calm	Strong	Dogs	R1	A4	0.2	0.13764	4	3.7	1.1595	4	4	1.1547	1.54	1.82544	1.1905	1.29934	0.928933	0.601624	0.387969	3.80379
02-01-02-02-02-01-05.mp4	VO	Speech	Calm	Strong	Dogs	R1	A5	0.5	0.3441	3	3.2	0.918937	3	2.9	1.52388	3.05	2.17403	1.23573	2.14391	1.33034	0.616678	0.405326	4.77144
02-01-02-02-02-01-06.mp4	VO	Speech	Calm	Strong	Dogs	R1	A6	0.8	0.550559	3	3.2	1.22927	3	3.1	1.1005	5.04	2.19626	1.54062	1.51659	1.19826	1.56989	1.03889	4.33767
02-01-02-02-02-01-07.mp4	VO	Speech	Calm	Strong	Dogs	R1	A7	0.5	0.3441	3	3.4	1.07497	4	3.7	1.1595	3.55	2.19255	1.00767	2.18406	1.48852	0.785334	0.736976	4.27094
02-01-02-02-02-01-08.mp4	VO	Speech	Calm	Strong	Dogs	R1	A8	0.4	0.27528	3.5	3.2	1.22927	3.5	3.8	1.13529	2.8	2.12254	1.62519	1.66949	1.71547	1.07252	0.814607	3.67033
02-01-02-02-02-01-09.mp4	VO	Speech	Calm	Strong	Dogs	R1	A9	1	0.688199	3.5	3.3	1.33749	3	3.4	0.966092	6.7	2.00226	1.2914	2.17117	2.11512	0.809391	0.714653	3.80379
02-01-02-02-02-01-10.mp4	VO	Speech	Calm	Strong	Dogs	R1	A10	0.4	0.27528	4	3.6	0.966092	4	4	1.05409	3.04	2.45596	1.92485	1.33702	1.34711	1.02369	0.662771	3.80379
02-01-02-02-02-01-11.mp4	VO	Speech	Calm	Strong	Dogs	R1	A11	0.9	0.619379	3.5	3.5	1.50923	3.5	3.8	1.13529	6.57	1.41946	0.706606	1.53228	1.07283	1.32062	1.09522	3.77044
02-01-02-02-02-01-12.mp4	VO	Speech	Calm	Strong	Dogs	R1	A12	0.8	0.550559	3	3.4	1.07497	3.5	3.6	0.699206	5.6	1.5542	0.758311	1.18284	0.66696	0.554711	0.430589	3.73708
02-01-02-02-02-01-13.mp4	VO	Speech	Calm	Strong	Dogs	R1	A13	0.9	0.619379	2	2.7	1.25167	4	3.7	0.948683	5.76	1.82224	1.06801	1.7043	1.02938	1.24291	0.936756	3.003
02-01-02-02-02-01-14.mp4	VO	Speech	Calm	Strong	Dogs	R1	A14	0.5	0.3441	2.5	2.8	1.39841	4	3.8	0.788811	3.3	2.21145	1.68193	1.43494	0.920066	1.27472	0.920857	3.73706
02-01-02-02-02-01-15.mp4	VO	Speech	Calm	Strong	Dogs	R1	A15	0.8	0.550559	3	2.9	1.19722	3	3.1	0.737865	4.8	2.14502	0.816511	2.41516	1.34765	1.91039	1.06214	3.93727
02-01-02-02-02-01-16.mp4	VO	Speech	Calm	Strong	Dogs	R1	A16	0.3	0.20646	4	3.7	0.823273	4	3.6	1.07497	2.19	1.85503	1.24915	1.55993	1.91095	0.657385	0.717572	3.80381
02-01-02-02-02-01-17.mp4	VO	Speech	Calm	Strong	Dogs	R1	A17	0.7	0.481739	4	3.6	0.843274	3.5	3.7	0.823273	5.11	2.00726	0.891658	1.1419	0.593974	0.914318	0.830233	3.83717
02-01-02-02-02-01-18.mp4	VO	Speech	Calm	Strong	Dogs	R1	A18	0.3	0.20646	4	3.6	1.07497	3	3.2	1.13529	2.04	1.4025	0.794136	1.79808	1.46577	1.03587	0.727987	3.60358
02-01-02-02-02-01-19.mp4	VO	Speech	Calm	Strong	Dogs	R1	A19	0.4	0.27528	4	3.7	1.56702	4.5	4.2	1.0328	3.16	3.11683	2.20288	1.65545	0.380753	1.40874	0.696353	4.6046
02-01-02-02-02-01-20.mp4	VO	Speech	Calm	Strong	Dogs	R1	A20	0.3	0.20646	3	2.7	0.823273	3	3.1	0.875595	1.74	1.94681	0.930433	1.61719	0.743478	1.248	0.850454	3.63696
02-01-02-02-02-01-21.mp4	VO	Speech	Calm	Strong	Dogs	R1	A21	0.1	0.0688199	3	3.2	1.22927	3	2.8	1.31656	0.6	2.52397	1.64458	1.43438	1.30081	0.875228	1.23682	4.13748
02-01-02-02-02-01-22.mp4	VO	Speech	Calm	Strong	Dogs	R1	A22	0.6	0.41292	3	3.3	1.05935	3.5	3.6	1.26491	4.14	2.09267	1.09412	1.35961	1.14898	0.687261	0.634287	3.63696
02-01-02-02-02-01-23.mp4	VO	Speech	Calm	Strong	Dogs	R1	A23	1	0.688199	3	3.1	0.994429	3	3	0.816497	6.1	1.67633	0.731943	1.60093	1.20625	1.68021	1.1206	4.1041
02-01-02-02-02-01-24.mp4	VO	Speech	Calm	Strong	Dogs	R1	A24	0.3	0.20646	3	2.9	1.1005	3	3.1	0.994429	1.8	1.70847	1.048	1.97669	1.50365	1.11407	1.2241	4.03737
02-01-02-02-02-02-01.mp4	VO	Speech	Calm	Strong	Dogs	R2	A1	0.6	0.41292	3	2.7	1.05935	3	3.1	0.567646	3.48	1.83016	0.903124	1.55234	0.929505	1.06197	0.895597	4.004
02-01-02-02-02-02-02.mp4	VO	Speech	Calm	Strong	Dogs	R2	A2	0.6	0.41292	2	2.4	1.07497	3	3	1.05409	3.24	1.58515	0.958352	1.35186	0.825932	1.07538	0.851929	4.1041
02-01-02-02-02-02-03.mp4	VO	Speech	Calm	Strong	Dogs	R2	A3	0.2	0.13764	3	3.1	1.19722	3	2.9	1.37032	1.2	1.31321	0.606621	1.39957	1.25156	0.488971	0.379822	4.004
02-01-02-02-02-02-04.mp4	VO	Speech	Calm	Strong	Dogs	R2	A4	0.2	0.13764	3	3.3	0.483046	4	3.8	1.13529	1.42	1.7066	1.06819	1.22165	0.663319	0.815409	0.705231	4.03737
02-01-02-02-02-02-05.mp4	VO	Speech	Calm	Strong	Dogs	R2	A5	0.6	0.41292	3	3	1.24722	3	3.1	0.994429	3.66	2.35595	1.55899	2.08901	1.26753	1.51945	0.635508	4.30429
02-01-02-02-02-02-06.mp4	VO	Speech	Calm	Strong	Dogs	R2	A6	0.9	0.619379	3.5	3.2	1.13529	3	2.8	0.918937	5.4	1.8759	1.32762	1.73157	1.03847	1.0744	0.768918	4.77144
02-01-02-02-02-02-07.mp4	VO	Speech	Calm	Strong	Dogs	R2	A7	0.6	0.41292	4	3.8	0.788811	3	3.3	0.948683	4.26	1.39668	0.635765	1.76574	1.87658	0.792018	0.482284	4.1041
02-01-02-02-02-02-08.mp4	VO	Speech	Calm	Strong	Dogs	R2	A8	0.8	0.550559	3.5	3.1	1.1005	4	3.3	1.05935	5.12	3.08496	2.22316	2.0194	1.634	1.48601	1.46737	3.80381
02-01-02-02-02-02-09.mp4	VO	Speech	Calm	Strong	Dogs	R2	A9	0.8	0.550559	3	2.9	0.994429	3	3.1	1.1005	4.8	3.28894	2.06605	2.76468	1.89262	0.842559	0.560333	3.63698
02-01-02-02-02-02-10.mp4	VO	Speech	Calm	Strong	Dogs	R2	A10	0.5	0.3441	3	2.8	0.632456	3.5	3.5	1.17851	3.15	2.23058	1.98667	2.4582	1.02717	0.844814	0.541187	3.83717
02-01-02-02-02-02-11.mp4	VO	Speech	Calm	Strong	Dogs	R2	A11	0.7	0.481739	3.5	3.3	1.05935	3.5	3.4	0.966092	4.69	1.68741	0.815984	1.71335	1.83497	1.48862	1.52603	3.83717
02-01-02-02-02-02-12.mp4	VO	Speech	Calm	Strong	Dogs	R2	A12	0.6	0.41292	3	3.2	1.39841	3	3.7	0.948683	4.14	2.45479	2.02368	1.15003	1.00106	0.784206	0.721088	3.80381
02-01-02-02-02-02-13.mp4	VO	Speech	Calm	Strong	Dogs	R2	A13	0.9	0.619379	3	3.3	0.823273	3	2.7	0.948683	5.4	1.37808	0.624763	1.19662	0.557852	0.666079	0.501884	3.03635
02-01-02-02-02-02-14.mp4	VO	Speech	Calm	Strong	Dogs	R2	A14	0.7	0.481739	3	3	1.05409	3	3.1	1.28668	4.27	1.86396	1.1838	2.0201	1.36745	1.14814	0.436001	3.77044
02-01-02-02-02-02-15.mp4	VO	Speech	Calm	Strong	Dogs	R2	A15	1	0.688199	3.5	3.5	1.2693	3	3.4	1.26491	6.9	2.18137	1.14074	1.57747	1.18885	0.95238	0.830701	3.60358
02-01-02-02-02-02-16.mp4	VO	Speech	Calm	Strong	Dogs	R2	A16	0.4	0.27528	3	3.4	1.07497	4	3.4	1.17379	2.72	2.20054	1.13479	1.81737	0.976004	0.705088	0.508437	3.80379
02-01-02-02-02-02-17.mp4	VO	Speech	Calm	Strong	Dogs	R2	A17	0.6	0.41292	3	2.5	0.971825	3	3.1	0.737865	3.36	2.15262	1.45066	1.39963	0.878464	1.02	1.094	3.53688
02-01-02-02-02-02-18.mp4	VO	Speech	Calm	Strong	Dogs	R2	A18	0.5	0.3441	3.5	3.6	1.26491	3	3	1.33333	3.3	1.37376	0.687007	1.16346	0.948017	1.03942	0.81251	3.6036
02-01-02-02-02-02-19.mp4	VO	Speech	Calm	Strong	Dogs	R2	A19	0.3	0.20646	4	3.6	0.699206	3	3.2	1.0328	2.04	1.92482	0.973915	1.97663	0.95393	1.01467	0.707555	4.30429
02-01-02-02-02-02-20.mp4	VO	Speech	Calm	Strong	Dogs	R2	A20	0.9	0.619379	3.5	3.5	0.849837	3.5	3.6	1.17379	6.39	2.16837	0.991975	1.44577	0.641571	0.86894	0.731229	3.63698
02-01-02-02-02-02-21.mp4	VO	Speech	Calm	Strong	Dogs	R2	A21	0.3	0.20646	3	3.3	0.948683	3	3	1.05409	1.89	2.27087	1.8866	1.42435	1.25894	0.815883	0.766532	3.97063
02-01-02-02-02-02-22.mp4	VO	Speech	Calm	Strong	Dogs	R2	A22	0.4	0.27528	3	3	1.33333	3	3.3	1.33749	2.52	1.96721	1.23729	1.79544	2.08433	1.359	1.03996	3.77044
02-01-02-02-02-02-23.mp4	VO	Speech	Calm	Strong	Dogs	R2	A23	0.9	0.619379	3	3.3	0.948683	4	3.7	0.948683	6.3	1.96081	1.76443	1.35005	0.834435	1.05503	1.13667	4.57123
02-01-02-02-02-02-24.mp4	VO	Speech	Calm	Strong	Dogs	R2	A24	0.2	0.13764	3.5	3.6	1.26491	3.5	3.4	1.26491	1.4	3.40709	2.16345	2.03122	1.14366	1.88763	1.2952	4.1041
02-01-03-01-01-01-01.mp4	VO	Speech	Happy	Normal	Kids	R1	A1	0.9	0.645172	4	3.7	1.1595	4	3.8	0.918937	6.75	1.61396	1.27793	0.963504	0.831341	0.845331	0.831188	3.47015
02-01-03-01-01-01-02.mp4	VO	Speech	Happy	Normal	Kids	R1	A2	0.9	0.645172	3	3.2	0.788811	4	3.7	1.05935	6.21	1.49192	0.875579	1.25379	1.11646	0.876892	0.501608	3.6036
02-01-03-01-01-01-03.mp4	VO	Speech	Happy	Normal	Kids	R1	A3	0.2	0.143372	3	3.1	1.44914	3.5	3.3	1.56702	1.28	2.53416	1.16085	1.65416	1.31096	1.02791	1.03357	3.77042
02-01-03-01-01-01-04.mp4	VO	Speech	Happy	Normal	Kids	R1	A4	0.7	0.5018	3	3.4	1.07497	4	3.6	1.07497	4.9	2.39024	1.56845	2.29682	1.57582	1.00603	0.61347	3.5035
02-01-03-01-01-01-05.mp4	VO	Speech	Happy	Normal	Kids	R1	A5	0.9	0.645172	3.5	3.9	0.994429	3.5	3.8	0.918937	6.93	3.51938	1.9003	1.95771	1.44193	0.694808	0.686619	4.004
02-01-03-01-01-01-06.mp4	VO	Speech	Happy	Normal	Kids	R1	A6	1	0.716858	4.5	4.5	0.527046	4	3.9	1.1005	8.4	1.84382	0.855109	1.17177	0.735068	0.806027	0.581969	3.53685
02-01-03-01-01-01-07.mp4	VO	Speech	Happy	Normal	Kids	R1	A7	0.9	0.645172	3	2.9	0.567646	3.5	3.3	0.823273	5.58	1.39573	0.712988	1.47031	1.44647	0.718844	0.648345	3.5035
02-01-03-01-01-01-08.mp4	VO	Speech	Happy	Normal	Kids	R1	A8	0.9	0.645172	4	3.8	0.632456	4	3.8	0.788811	6.84	2.154	1.68319	1.47641	1.05806	0.949766	0.966464	3.5035
02-01-03-01-01-01-09.mp4	VO	Speech	Happy	Normal	Kids	R1	A9	0.9	0.645172	4	3.8	1.13529	4	3.9	1.28668	6.93	2.72885	2.10966	1.8151	0.968689	0.845099	0.925092	3.33667
02-01-03-01-01-01-10.mp4	VO	Speech	Happy	Normal	Kids	R1	A10	1	0.716858	3	3.5	0.707107	4	3.8	0.632456	7.3	1.66348	0.995991	1.36172	1.04587	0.972807	0.586072	3.5035
02-01-03-01-01-01-11.mp4	VO	Speech	Happy	Normal	Kids	R1	A11	0.5	0.358429	3	2.9	1.19722	3.5	3.6	1.17379	3.25	2.57536	1.50208	1.56105	0.785695	1.33646	0.762906	3.1031
02-01-03-01-01-01-12.mp4	VO	Speech	Happy	Normal	Kids	R1	A12	0.9	0.645172	3.5	3.4	0.966092	4	3.9	0.994429	6.57	2.06218	1.48207	2.2503	1.25101	1.07435	0.910337	3.70371
02-01-03-01-01-01-13.mp4	VO	Speech	Happy	Normal	Kids	R1	A13	0.9	0.645172	3	3.4	0.516398	3.5	3.6	0.966092	6.3	1.62995	1.00165	1.33995	1.01051	0.610895	0.534801	3.23656
02-01-03-01-01-01-14.mp4	VO	Speech	Happy	Normal	Kids	R1	A14	0.9	0.645172	3.5	3.6	0.699206	3	2.5	1.17851	5.49	2.49551	1.47218	1.80396	1.48201	0.971299	0.946337	3.70371
02-01-03-01-01-01-15.mp4	VO	Speech	Happy	Normal	Kids	R1	A15	0.9	0.645172	3	3.4	0.843274	3	3.2	0.632456	5.94	2.13098	1.72724	2.59383	1.89883	1.11321	0.609387	3.4034
02-01-03-01-01-01-16.mp4	VO	Speech	Happy	Normal	Kids	R1	A16	0.8	0.573486	4.5	4.1	1.1005	3.5	3.8	0.918937	6.32	1.71328	0.893454	1.84694	1.109	0.84187	0.71052	3.70371
02-01-03-01-01-01-17.mp4	VO	Speech	Happy	Normal	Kids	R1	A17	0.9	0.645172	3	3	1.05409	3	2.5	0.971825	4.95	2.06791	0.878383	1.43445	0.504398	1.39608	1.02548	3.47012
02-01-03-01-01-01-18.mp4	VO	Speech	Happy	Normal	Kids	R1	A18	0.9	0.645172	4	4	0.816497	3.5	3.4	1.26491	6.66	2.99267	1.59494	2.23556	1.56444	1.29121	1.18399	3.4034
02-01-03-01-01-01-19.mp4	VO	Speech	Happy	Normal	Kids	R1	A19	0.8	0.573486	4	3.6	0.966092	4	3.9	0.737865	6	1.50583	0.79759	2.1831	1.88623	1.27136	1.14381	3.63696
02-01-03-01-01-01-20.mp4	VO	Speech	Happy	Normal	Kids	R1	A20	0.9	0.645172	5	4.4	0.843274	4	4.2	0.788811	7.74	2.68145	1.76776	1.09632	0.889535	0.604196	0.562663	3.53688
02-01-03-01-01-01-21.mp4	VO	Speech	Happy	Normal	Kids	R1	A21	0.9	0.645172	3	3.3	0.483046	3	3.4	1.17379	6.03	2.60264	1.21558	2.53574	1.92236	0.877988	0.693347	3.83717
02-01-03-01-01-01-22.mp4	VO	Speech	Happy	Normal	Kids	R1	A22	0.9	0.645172	2	2.4	0.966092	3	3.4	1.07497	5.22	1.50743	0.639327	1.15962	0.878727	1.34705	0.957856	3.53688
02-01-03-01-01-01-23.mp4	VO	Speech	Happy	Normal	Kids	R1	A23	0.3	0.215057	3.5	3.2	1.0328	4	3.9	0.875595	2.13	2.48677	1.94883	1.72117	1.59728	0.858577	0.613469	3.33667
02-01-03-01-01-01-24.mp4	VO	Speech	Happy	Normal	Kids	R1	A24	1	0.716858	4	3.9	0.737865	4	3.9	1.1005	7.8	1.74811	1.13958	2.05977	1.82555	1.30089	1.03366	3.6036
02-01-03-01-01-02-01.mp4	VO	Speech	Happy	Normal	Kids	R2	A1	0.9	0.645172	3.5	3.7	0.823273	3	3.6	0.843274	6.57	1.81628	1.12523	1.94422	1.95104	0.610872	0.586654	3.47012
02-01-03-01-01-02-02.mp4	VO	Speech	Happy	Normal	Kids	R2	A2	0.6	0.430115	3.5	3.4	0.966092	3	3.2	1.31656	3.96	2.26524	0.971977	2.36794	1.24844	0.821974	0.593261	3.70369
02-01-03-01-01-02-03.mp4	VO	Speech	Happy	Normal	Kids	R2	A3	0.6	0.430115	4	3.6	1.17379	3	3.2	1.31656	4.08	2.41539	1.57302	1.99193	1.61647	0.56579	0.651244	3.60358
02-01-03-01-01-02-04.mp4	VO	Speech	Happy	Normal	Kids	R2	A4	1	0.716858	4.5	4.2	1.0328	3.5	3.4	1.50555	7.6	2.99788	2.03123	1.96318	1.37291	1.10583	0.924396	3.53685
02-01-03-01-01-02-05.mp4	VO	Speech	Happy	Normal	Kids	R2	A5	0.8	0.573486	4	3.7	0.483046	4	3.6	1.17379	5.84	2.17325	0.848691	2.41038	1.66905	1.62058	0.759699	3.23656
02-01-03-01-01-02-06.mp4	VO	Speech	Happy	Normal	Kids	R2	A6	1	0.716858	4.5	4.2	0.918937	4	3.6	1.07497	7.8	1.67765	0.391705	1.21433	0.575569	1.13588	0.67806	3.6036
02-01-03-01-01-02-07.mp4	VO	Speech	Happy	Normal	Kids	R2	A7	1	0.716858	4	3.5	1.17851	4	3.4	1.17379	6.9	1.54763	0.629726	1.1639	0.76435	0.745816	0.645877	3.47012
02-01-03-01-01-02-08.mp4	VO	Speech	Happy	Normal	Kids	R2	A8	1	0.716858	4	4	0.816497	5	4.4	1.3499	8.4	2.1352	1.08859	1.77071	0.952661	1.13903	1.07518	3.43675
02-01-03-01-01-02-09.mp4	VO	Speech	Happy	Normal	Kids	R2	A9	0.9	0.645172	3	3.5	0.707107	3	3.3	0.948683	6.12	2.22756	0.947623	1.67537	0.83409	1.12075	0.566662	3.53685
02-01-03-01-01-02-10.mp4	VO	Speech	Happy	Normal	Kids	R2	A10	0.9	0.645172	4	3.9	1.19722	4.5	3.9	1.28668	7.02	1.9428	0.853751	1.82016	1.2499	0.688808	0.370867	3.47012
02-01-03-01-01-02-11.mp4	VO	Speech	Happy	Normal	Kids	R2	A11	0.7	0.5018	4	3.7	0.823273	4	4	0.816497	5.39	1.7602	0.762528	2.07402	1.35966	1.23719	0.946832	3.20321
02-01-03-01-01-02-12.mp4	VO	Speech	Happy	Normal	Kids	R2	A12	0.9	0.645172	4	4.2	0.788811	4.5	4.4	0.699206	7.74	1.58982	0.999568	0.982567	0.828482	0.505882	0.42524	3.73706
02-01-03-01-01-02-13.mp4	VO	Speech	Happy	Normal	Kids	R2	A13	0.8	0.573486	3	3	0.666667	3	3.4	1.17379	5.12	1.85174	0.984761	2.33286	1.52795	0.80775	0.45988	3.20321
02-01-03-01-01-02-14.mp4	VO	Speech	Happy	Normal	Kids	R2	A14	1	0.716858	4	4.1	0.875595	5	4.2	1.13529	8.3	2.18038	0.841157	1.95312	2.00718	0.847332	0.653511	3.67033
02-01-03-01-01-02-15.mp4	VO	Speech	Happy	Normal	Kids	R2	A15	0.4	0.286743	2.5	2.5	1.08012	3	3.1	0.875595	2.24	2.72644	1.52195	1.16833	0.710175	0.881603	0.428221	3.33667
02-01-03-01-01-02-16.mp4	VO	Speech	Happy	Normal	Kids	R2	A16	1	0.716858	4	4.1	0.737865	3	3.4	1.3499	7.5	1.62822	0.794654	1.24871	0.520751	0.909512	0.601247	3.67033
02-01-03-01-01-02-17.mp4	VO	Speech	Happy	Normal	Kids	R2	A17	0.6	0.430115	3	2.8	1.0328	3	2.8	1.22927	3.36	2.72759	1.88783	1.67487	0.998513	0.65473	0.419287	3.53688
02-01-03-01-01-02-18.mp4	VO	Speech	Happy	Normal	Kids	R2	A18	0.8	0.573486	4	3.8	1.39841	3.5	3.4	1.26491	5.76	2.58081	1.3288	2.45696	1.57981	0.91375	0.550099	3.37002
02-01-03-01-01-02-19.mp4	VO	Speech	Happy	Normal	Kids	R2	A19	0.9	0.645172	4	3.7	1.25167	4	3.8	1.0328	6.75	2.4231	2.15897	2.0231	1.69691	1.09972	1.19999	3.70371
02-01-03-01-01-02-20.mp4	VO	Speech	Happy	Normal	Kids	R2	A20	0.7	0.5018	3	3.2	1.22927	3	3.3	1.41814	4.55	1.82321	1.04746	1.47675	0.880616	1.15231	0.552877	3.70369
02-01-03-01-01-02-21.mp4	VO	Speech	Happy	Normal	Kids	R2	A21	0.9	0.645172	4	3.5	1.08012	4	3.8	1.22927	6.57	1.29469	0.528581	1.97683	1.24271	1.13873	0.920377	3.80379
02-01-03-01-01-02-22.mp4	VO	Speech	Happy	Normal	Kids	R2	A22	0.9	0.645172	3	3.2	0.632456	4	3.4	1.3499	5.94	2.17692	0.823205	1.71503	1.1471	1.87114	1.41323	3.43677
02-01-03-01-01-02-23.mp4	VO	Speech	Happy	Normal	Kids	R2	A23	0.7	0.5018	3	2.9	0.994429	3	3.4	0.843274	4.41	2.44273	2.09658	1.82739	1.75777	1.35047	0.858271	3.26994
02-01-03-01-01-02-24.mp4	VO	Speech	Happy	Normal	Kids	R2	A24	1	0.716858	4	4	0.816497	4	3.7	1.1595	7.7	2.38217	0.874318	1.69863	1.39581	0.95999	0.680656	3.9039
02-01-03-01-02-01-01.mp4	VO	Speech	Happy	Normal	Dogs	R1	A1	1	0.716858	4	3.7	0.948683	4	4.2	0.632456	7.9	1.93211	1.12504	1.76764	0.71172	0.754978	0.419801	3.53685
02-01-03-01-02-01-02.mp4	VO	Speech	Happy	Normal	Dogs	R1	A2	0.8	0.573486	3.5	3.3	1.05935	3.5	3.5	1.50923	5.44	1.42182	0.536214	1.85015	1.11249	0.789896	0.60721	3.77044
02-01-03-01-02-01-03.mp4	VO	Speech	Happy	Normal	Dogs	R1	A3	0.5	0.358429	3	3.1	1.19722	3	2.8	1.31656	2.95	3.26416	2.39065	1.74377	1.17398	1.02027	0.98358	3.5035
02-01-03-01-02-01-04.mp4	VO	Speech	Happy	Normal	Dogs	R1	A4	1	0.716858	4.5	4.4	0.699206	4.5	3.8	1.47573	8.2	1.54616	0.629139	1.34887	0.933965	0.688528	0.544531	3.5035
02-01-03-01-02-01-05.mp4	VO	Speech	Happy	Normal	Dogs	R1	A5	0.9	0.645172	5	4.2	1.0328	3	3.5	1.35401	6.93	2.64028	1.6473	1.51549	1.06895	0.929159	0.650993	3.37002
02-01-03-01-02-01-06.mp4	VO	Speech	Happy	Normal	Dogs	R1	A6	1	0.716858	4	4.2	0.788811	4	4	0.666667	8.2	2.00573	0.868064	1.19569	0.709366	0.501725	0.383333	3.47012
02-01-03-01-02-01-07.mp4	VO	Speech	Happy	Normal	Dogs	R1	A7	0.9	0.645172	4	4	0.666667	3.5	3.6	0.966092	6.84	1.13468	0.82616	1.45179	1.35625	1.16992	0.897496	3.4034
02-01-03-01-02-01-08.mp4	VO	Speech	Happy	Normal	Dogs	R1	A8	1	0.716858	4	3.9	1.19722	4	3.9	1.37032	7.8	1.77054	1.14646	2.70121	1.62855	1.27591	0.912887	3.47012
02-01-03-01-02-01-09.mp4	VO	Speech	Happy	Normal	Dogs	R1	A9	0.8	0.573486	3	2.8	1.0328	3.5	3.2	1.31656	4.8	2.18043	1.52361	1.54574	0.797544	1.27334	0.837597	3.30329
02-01-03-01-02-01-10.mp4	VO	Speech	Happy	Normal	Dogs	R1	A10	0.9	0.645172	4	3.9	0.875595	4.5	4.1	1.28668	7.2	3.0564	1.6261	2.48752	1.82781	0.816467	0.802502	3.30329
02-01-03-01-02-01-11.mp4	VO	Speech	Happy	Normal	Dogs	R1	A11	0.7	0.5018	3	2.9	0.994429	4	3.8	0.788811	4.69	2.95672	2.41583	1.81621	2.12157	1.14347	1.24708	3.16983
02-01-03-01-02-01-12.mp4	VO	Speech	Happy	Normal	Dogs	R1	A12	1	0.716858	3.5	3.7	0.823273	4.5	4.2	1.0328	7.9	2.02526	1.30245	2.47546	1.98903	1.16517	0.655256	3.5035
02-01-03-01-02-01-13.mp4	VO	Speech	Happy	Normal	Dogs	R1	A13	1	0.716858	3	3	1.1547	4	3.5	1.08012	6.5	1.96232	1.01824	1.13854	0.79106	0.695023	0.60124	3.13648
02-01-03-01-02-01-14.mp4	VO	Speech	Happy	Normal	Dogs	R1	A14	1	0.716858	3	3.1	0.737865	3	3.3	0.948683	6.4	1.83061	0.50407	1.46623	0.741455	0.916762	0.543023	3.4034
02-01-03-01-02-01-15.mp4	VO	Speech	Happy	Normal	Dogs	R1	A15	0.8	0.573486	3	2.7	0.948683	3	2.9	1.37032	4.48	1.92842	0.78066	1.08302	0.82382	1.12998	0.636638	3.33667
02-01-03-01-02-01-16.mp4	VO	Speech	Happy	Normal	Dogs	R1	A16	1	0.716858	3.5	3.7	0.823273	4	4	0.666667	7.7	1.81673	1.08662	1.66463	1.56112	0.732996	0.635069	3.73706
02-01-03-01-02-01-17.mp4	VO	Speech	Happy	Normal	Dogs	R1	A17	0.8	0.573486	3	3	0.942809	4	3.4	1.42984	5.12	2.78229	1.99866	1.56259	1.01369	1.17332	1.10805	3.47015
02-01-03-01-02-01-18.mp4	VO	Speech	Happy	Normal	Dogs	R1	A18	1	0.716858	3	3.2	0.632456	3	3.1	1.28668	6.3	1.85425	1.18909	1.41805	1.07923	0.617676	0.45251	3.43675
02-01-03-01-02-01-19.mp4	VO	Speech	Happy	Normal	Dogs	R1	A19	0.8	0.573486	4	3.6	0.843274	3.5	3.7	1.05935	5.84	1.73065	1.43203	1.33404	0.997983	1.01971	1.03615	3.26994
02-01-03-01-02-01-20.mp4	VO	Speech	Happy	Normal	Dogs	R1	A20	1	0.716858	3.5	3.6	0.966092	4	3.9	0.737865	7.5	1.85447	1.08914	1.78775	1.19625	0.893776	0.479438	3.47012
02-01-03-01-02-01-21.mp4	VO	Speech	Happy	Normal	Dogs	R1	A21	1	0.716858	4.5	4.4	0.699206	3.5	3.3	1.56702	7.7	1.88189	1.01978	1.83275	1.45859	1.08121	0.785323	3.70371
02-01-03-01-02-01-22.mp4	VO	Speech	Happy	Normal	Dogs	R1	A22	0.7	0.5018	3	3.1	0.875595	3	2.6	0.699206	3.99	2.75372	2.36391	1.17815	1.00557	0.691294	0.46466	3.5035
02-01-03-01-02-01-23.mp4	VO	Speech	Happy	Normal	Dogs	R1	A23	0.7	0.5018	3	2.9	0.737865	3.5	3.3	1.33749	4.34	2.70428	2.4121	1.50155	1.30984	0.539098	0.566893	3.23656
02-01-03-01-02-01-24.mp4	VO	Speech	Happy	Normal	Dogs	R1	A24	1	0.716858	3.5	3.5	0.849837	3	3.4	1.17379	6.9	2.20038	1.33611	1.84025	1.25708	1.47099	1.09741	3.5035
02-01-03-01-02-02-01.mp4	VO	Speech	Happy	Normal	Dogs	R2	A1	0.8	0.573486	4	4.1	0.737865	4	3.9	1.28668	6.4	2.40177	1.82471	2.60066	2.12275	0.644598	0.485177	3.70371
02-01-03-01-02-02-02.mp4	VO	Speech	Happy	Normal	Dogs	R2	A2	0.6	0.430115	3	3.4	1.26491	3.5	3.4	1.64655	4.08	2.67193	1.54369	2.3909	1.59458	1.11984	0.796208	3.73708
02-01-03-01-02-02-03.mp4	VO	Speech	Happy	Normal	Dogs	R2	A3	0.4	0.286743	3	3	1.24722	2.5	2.6	1.42984	2.24	2.16348	1.65349	0.898298	0.516288	1.02346	0.551592	3.5035
02-01-03-01-02-02-04.mp4	VO	Speech	Happy	Normal	Dogs	R2	A4	0.9	0.645172	5	4.5	0.707107	4	3.6	1.17379	7.29	1.92926	1.58761	1.17898	0.813711	0.795282	0.73358	3.43677
02-01-03-01-02-02-05.mp4	VO	Speech	Happy	Normal	Dogs	R2	A5	0.9	0.645172	4	4	1.1547	4	3.6	1.57762	6.84	2.51744	1.36188	1.57595	0.782118	1.15862	0.753846	3.77044
02-01-03-01-02-02-06.mp4	VO	Speech	Happy	Normal	Dogs	R2	A6	0.9	0.645172	4	4.1	0.737865	4	4	1.05409	7.29	1.61554	0.50659	1.38858	1.13455	1.11862	1.15416	3.43677
02-01-03-01-02-02-07.mp4	VO	Speech	Happy	Normal	Dogs	R2	A7	1	0.716858	4	3.9	1.1005	5	4.1	1.52388	8	1.8302	1.00895	1.15012	0.788727	0.53518	0.463842	3.4034
02-01-03-01-02-02-08.mp4	VO	Speech	Happy	Normal	Dogs	R2	A8	1	0.716858	4	4.4	0.516398	5	4.3	1.25167	8.7	1.42365	0.643888	1.04945	0.55574	0.986241	0.790298	3.43677
02-01-03-01-02-02-09.mp4	VO	Speech	Happy	Normal	Dogs	R2	A9	0.8	0.573486	4	3.8	0.788811	4	3.6	0.699206	5.92	2.00739	1.22698	1.7047	0.796609	0.931217	0.910602	3.47015
02-01-03-01-02-02-10.mp4	VO	Speech	Happy	Normal	Dogs	R2	A10	0.9	0.645172	4	3.9	0.737865	4	4	1.05409	7.11	2.09404	1.03778	1.56129	1.05509	0.923775	0.675815	3.33667
02-01-03-01-02-02-11.mp4	VO	Speech	Happy	Normal	Dogs	R2	A11	0.6	0.430115	3	2.7	0.948683	3.5	3.5	0.849837	3.72	2.58861	1.93944	1.69089	1.27072	0.680606	0.686748	3.23658
02-01-03-01-02-02-12.mp4	VO	Speech	Happy	Normal	Dogs	R2	A12	1	0.716858	3	3.5	0.707107	4.5	4	1.24722	7.5	1.69964	0.769402	1.85374	1.10402	0.732265	0.360058	3.73708
02-01-03-01-02-02-13.mp4	VO	Speech	Happy	Normal	Dogs	R2	A13	1	0.716858	3.5	3.7	0.823273	4	3.9	1.1005	7.6	1.7531	0.977183	1.5215	1.22306	0.745751	0.72263	3.20321
02-01-03-01-02-02-14.mp4	VO	Speech	Happy	Normal	Dogs	R2	A14	0.9	0.645172	4	3.6	0.843274	4	3.8	1.31656	6.66	2.1103	1.2142	1.76879	1.45781	1.40163	1.25359	3.47012
02-01-03-01-02-02-15.mp4	VO	Speech	Happy	Normal	Dogs	R2	A15	0.8	0.573486	3	3.5	1.17851	3	3.1	0.737865	5.28	2.87001	1.73093	1.99321	1.27385	1.27533	1.01378	3.43677
02-01-03-01-02-02-16.mp4	VO	Speech	Happy	Normal	Dogs	R2	A16	1	0.716858	4	3.9	0.875595	4	3.9	1.1005	7.8	1.49349	0.436135	1.13443	0.723557	0.459466	0.462531	3.67033
02-01-03-01-02-02-17.mp4	VO	Speech	Happy	Normal	Dogs	R2	A17	0.7	0.5018	3	3	0.471405	4	4	0.666667	4.9	2.47464	1.91881	1.79806	0.847804	0.900702	1.34456	3.53685
02-01-03-01-02-02-18.mp4	VO	Speech	Happy	Normal	Dogs	R2	A18	1	0.716858	4	4.1	0.567646	4	3.9	1.28668	8	2.1403	0.594406	1.86983	1.32225	0.627441	0.511682	3.5035
02-01-03-01-02-02-19.mp4	VO	Speech	Happy	Normal	Dogs	R2	A19	0.8	0.573486	4	3.8	0.788811	4	3.9	0.875595	6.16	1.25246	0.556006	1.64318	1.42931	0.908981	0.895061	3.30331
02-01-03-01-02-02-20.mp4	VO	Speech	Happy	Normal	Dogs	R2	A20	0.9	0.645172	3	3.1	0.994429	3	3.2	0.632456	5.67	1.62671	0.562414	2.11917	1.18923	1.3003	1.05066	3.4034
02-01-03-01-02-02-21.mp4	VO	Speech	Happy	Normal	Dogs	R2	A21	1	0.716858	3	3.3	1.05935	3	2.8	1.13529	6.1	1.83464	0.462087	1.87754	1.44083	0.933721	0.90264	3.83717
02-01-03-01-02-02-22.mp4	VO	Speech	Happy	Normal	Dogs	R2	A22	0.8	0.573486	4	3.9	0.737865	4.5	4.3	0.823273	6.56	2.22076	1.72685	1.88888	1.05503	0.610825	0.422851	3.5035
02-01-03-01-02-02-23.mp4	VO	Speech	Happy	Normal	Dogs	R2	A23	1	0.716858	3	3.6	0.843274	4	3.8	0.918937	7.4	2.34593	1.15401	2.04239	1.17594	0.629244	0.506459	3.26994
02-01-03-01-02-02-24.mp4	VO	Speech	Happy	Normal	Dogs	R2	A24	1	0.716858	4	4.2	0.632456	4	4	0.942809	8.2	1.57755	0.837924	2.0693	1.57749	1.10544	1.25604	3.73706
02-01-03-02-01-01-01.mp4	VO	Speech	Happy	Strong	Kids	R1	A1	1	0.716858	4	4	1.05409	4.5	3.8	1.54919	7.8	2.62832	1.62391	1.33491	0.934306	1.15879	1.08371	3.67033
02-01-03-02-01-01-02.mp4	VO	Speech	Happy	Strong	Kids	R1	A2	1	0.716858	4	4.3	0.483046	3.5	3.6	1.17379	7.9	2.01614	1.11238	1.72442	1.21513	1.02442	0.622526	3.70371
02-01-03-02-01-01-03.mp4	VO	Speech	Happy	Strong	Kids	R1	A3	0.5	0.358429	3.5	3.6	0.966092	3	2.8	1.13529	3.2	3.17227	2.28158	2.02982	0.925546	0.85704	0.739554	4.30431
02-01-03-02-01-01-04.mp4	VO	Speech	Happy	Strong	Kids	R1	A4	1	0.716858	5	4.6	0.516398	4	4.1	0.737865	8.7	1.93867	1.00834	1.23287	0.732983	0.774743	0.883206	3.87054
02-01-03-02-01-01-05.mp4	VO	Speech	Happy	Strong	Kids	R1	A5	0.9	0.645172	4	4.2	0.788811	3	3.3	1.49443	6.75	2.5542	0.59106	2.17864	1.33989	1.34828	1.40542	4.13748
02-01-03-02-01-01-06.mp4	VO	Speech	Happy	Strong	Kids	R1	A6	0.9	0.645172	5	4.8	0.421637	4	4	1.05409	7.92	2.11889	1.29697	1.045	0.508047	0.750083	0.590464	3.5035
02-01-03-02-01-01-07.mp4	VO	Speech	Happy	Strong	Kids	R1	A7	0.7	0.5018	4	3.8	1.13529	3.5	3.5	1.2693	5.11	2.08286	0.97683	1.9731	0.939966	1.37334	1.28588	4.1041
02-01-03-02-01-01-08.mp4	VO	Speech	Happy	Strong	Kids	R1	A8	1	0.716858	4.5	4.4	0.699206	4	4	1.24722	8.4	1.95426	0.814536	2.0478	1.56618	0.6697	0.480991	3.77042
02-01-03-02-01-01-09.mp4	VO	Speech	Happy	Strong	Kids	R1	A9	1	0.716858	5	4.7	0.483046	5	4.1	1.28668	8.8	2.07239	0.599026	1.82264	1.0526	1.12516	0.938382	3.77044
02-01-03-02-01-01-10.mp4	VO	Speech	Happy	Strong	Kids	R1	A10	0.9	0.645172	4	3.9	0.875595	4	3.7	1.05935	6.84	2.44588	2.15446	1.74017	1.16415	1.07845	0.785815	3.83717
02-01-03-02-01-01-11.mp4	VO	Speech	Happy	Strong	Kids	R1	A11	0.9	0.645172	4	3.9	0.875595	4	3.8	1.39841	6.93	2.69535	1.75612	1.57375	1.29738	0.922586	0.787218	4.03737
02-01-03-02-01-01-12.mp4	VO	Speech	Happy	Strong	Kids	R1	A12	1	0.716858	5	4.5	0.971825	3.5	3.6	1.42984	8.1	2.22753	1.01945	2.41713	2.04229	0.84648	0.843944	4.20421
02-01-03-02-01-01-13.mp4	VO	Speech	Happy	Strong	Kids	R1	A13	1	0.716858	4	3.8	0.788811	4.5	3.9	1.44914	7.7	1.62647	0.990357	1.73151	0.932871	0.618214	0.407896	3.43677
02-01-03-02-01-01-14.mp4	VO	Speech	Happy	Strong	Kids	R1	A14	0.9	0.645172	5	4.5	0.849837	4	4.1	0.875595	7.74	2.01323	1.59882	1.72769	1.0261	1.2392	0.764337	3.77042
02-01-03-02-01-01-15.mp4	VO	Speech	Happy	Strong	Kids	R1	A15	0.9	0.645172	3	3.2	0.918937	3.5	3.3	1.1595	5.85	2.2193	1.87613	2.85972	1.83911	1.06907	0.819463	3.57023
02-01-03-02-01-01-16.mp4	VO	Speech	Happy	Strong	Kids	R1	A16	0.9	0.645172	5	4.6	0.699206	3.5	3.7	1.05935	7.47	2.13382	0.860492	1.69972	1.31119	0.987612	1.09092	3.77044
02-01-03-02-01-01-17.mp4	VO	Speech	Happy	Strong	Kids	R1	A17	0.6	0.430115	3.5	3.3	0.823273	2.5	3.1	1.28668	3.84	2.34688	1.4168	3.023	1.80148	0.700663	0.467126	3.73706
02-01-03-02-01-01-18.mp4	VO	Speech	Happy	Strong	Kids	R1	A18	1	0.716858	5	5	0	5	4.3	1.25167	9.3	1.70652	0.727536	1.3392	0.601258	0.550371	0.345474	3.77044
02-01-03-02-01-01-19.mp4	VO	Speech	Happy	Strong	Kids	R1	A19	1	0.716858	3.5	3.3	0.823273	2.5	2.5	1.08012	5.8	2.48306	1.27853	1.13543	0.679274	0.678186	0.398077	3.77044
02-01-03-02-01-01-20.mp4	VO	Speech	Happy	Strong	Kids	R1	A20	0.9	0.645172	4.5	4	1.24722	3	3.3	1.25167	6.57	2.22778	1.63084	2.76596	1.96374	0.972142	0.904292	3.67033
02-01-03-02-01-01-21.mp4	VO	Speech	Happy	Strong	Kids	R1	A21	0.9	0.645172	4	3.7	0.483046	4	3.1	1.66333	6.12	2.74421	1.73475	2.1747	1.18247	0.962829	0.588073	3.80379
02-01-03-02-01-01-22.mp4	VO	Speech	Happy	Strong	Kids	R1	A22	1	0.716858	4	3.8	0.918937	4	3.7	1.49443	7.5	1.88875	0.872492	1.54364	1.11796	0.835093	0.683042	3.73708
02-01-03-02-01-01-23.mp4	VO	Speech	Happy	Strong	Kids	R1	A23	0.6	0.430115	4	3.9	0.994429	4	4.1	0.994429	4.8	2.5885	1.59179	2.14622	1.59813	1.27946	0.845428	3.23658
02-01-03-02-01-01-24.mp4	VO	Speech	Happy	Strong	Kids	R1	A24	0.8	0.573486	4	3.8	1.13529	3.5	3.6	1.42984	5.92	1.81186	1.0448	1.8632	1.88529	0.989945	0.489702	4.004
02-01-03-02-01-02-01.mp4	VO	Speech	Happy	Strong	Kids	R2	A1	1	0.716858	4	3.9	0.567646	4	3.7	0.948683	7.6	2.19169	0.843084	1.89951	0.818764	0.968041	0.766573	3.63696
02-01-03-02-01-02-02.mp4	VO	Speech	Happy	Strong	Kids	R2	A2	1	0.716858	4	4.1	0.737865	3.5	3.2	1.22927	7.3	1.74035	0.910537	1.91564	1.33258	1.0917	0.736653	3.67033
02-01-03-02-01-02-03.mp4	VO	Speech	Happy	Strong	Kids	R2	A3	0.4	0.286743	4	4	0.816497	3	3.4	0.966092	2.96	2.90513	2.29153	1.321	1.30995	0.579345	0.657309	4.4044
02-01-03-02-01-02-04.mp4	VO	Speech	Happy	Strong	Kids	R2	A4	0.7	0.5018	4	4.2	0.788811	4	4.1	0.737865	5.81	3.32619	1.6459	1.4954	0.764231	1.23676	0.843993	3.57023
02-01-03-02-01-02-05.mp4	VO	Speech	Happy	Strong	Kids	R2	A5	0.9	0.645172	4.5	4.1	0.994429	3.5	3.3	1.05935	6.66	2.50949	1.72799	1.49096	1.0091	0.703276	0.369484	3.87054
02-01-03-02-01-02-06.mp4	VO	Speech	Happy	Strong	Kids	R2	A6	0.9	0.645172	5	4.4	0.843274	4	3.8	1.39841	7.38	1.65603	0.615068	1.80064	1.00438	0.591341	0.453033	3.47012
02-01-03-02-01-02-07.mp4	VO	Speech	Happy	Strong	Kids	R2	A7	0.7	0.5018	4	3.8	0.788811	3.5	3.3	1.1595	4.97	2.33688	1.38549	1.48784	0.54426	0.989112	1.15422	4.03735
02-01-03-02-01-02-08.mp4	VO	Speech	Happy	Strong	Kids	R2	A8	1	0.716858	5	4.7	0.483046	4	4	1.1547	8.7	2.19089	0.801909	1.58784	1.07833	0.931913	0.754341	3.9039
02-01-03-02-01-02-09.mp4	VO	Speech	Happy	Strong	Kids	R2	A9	1	0.716858	5	4.4	0.843274	4.5	3.9	1.28668	8.3	2.23968	2.03237	1.33963	0.831154	1.016	0.697641	4.17083
02-01-03-02-01-02-10.mp4	VO	Speech	Happy	Strong	Kids	R2	A10	1	0.716858	4	4.3	0.483046	4	3.9	1.28668	8.2	1.37322	0.659279	1.18075	0.792987	0.713425	0.67299	3.5035
02-01-03-02-01-02-11.mp4	VO	Speech	Happy	Strong	Kids	R2	A11	0.9	0.645172	3	3.1	1.19722	3.5	3.2	1.39841	5.67	2.07156	1.1664	1.8754	1.37446	0.703595	0.586492	3.63698
02-01-03-02-01-02-12.mp4	VO	Speech	Happy	Strong	Kids	R2	A12	0.9	0.645172	4	4	0.816497	4	3.6	0.843274	6.84	2.31404	1.35965	1.36369	0.689036	1.09418	0.775676	4.13746
02-01-03-02-01-02-13.mp4	VO	Speech	Happy	Strong	Kids	R2	A13	1	0.716858	4	4.2	0.632456	4	3.6	1.17379	7.8	1.86725	0.568698	1.80608	1.49786	1.4198	1.27768	3.6036
02-01-03-02-01-02-14.mp4	VO	Speech	Happy	Strong	Kids	R2	A14	0.9	0.645172	5	4.2	1.22927	3.5	3.1	1.52388	6.57	2.37248	1.77003	1.48682	0.734119	1.15035	1.00853	3.73706
02-01-03-02-01-02-15.mp4	VO	Speech	Happy	Strong	Kids	R2	A15	1	0.716858	4	3.9	0.567646	5	4.3	0.948683	8.2	2.03412	0.981991	2.91298	1.97979	1.62818	1.17795	3.47012
02-01-03-02-01-02-16.mp4	VO	Speech	Happy	Strong	Kids	R2	A16	1	0.716858	5	4.6	0.516398	4	3.6	1.50555	8.2	1.7473	1.0428	1.33347	0.73389	1.10938	0.802377	3.57023
02-01-03-02-01-02-17.mp4	VO	Speech	Happy	Strong	Kids	R2	A17	0.9	0.645172	4.5	4.3	0.823273	3.5	3.3	1.33749	6.84	1.96054	1.29017	1.33393	1.39233	0.721242	0.531352	4.1041
02-01-03-02-01-02-18.mp4	VO	Speech	Happy	Strong	Kids	R2	A18	0.9	0.645172	5	4.8	0.421637	5	4.2	1.47573	8.1	1.44825	0.680936	0.987732	0.652478	0.920992	0.748652	3.93725
02-01-03-02-01-02-19.mp4	VO	Speech	Happy	Strong	Kids	R2	A19	1	0.716858	4	4.3	0.674949	3	3.3	0.948683	7.6	2.50211	0.732758	2.50093	1.65268	1.42421	1.09038	3.80379
02-01-03-02-01-02-20.mp4	VO	Speech	Happy	Strong	Kids	R2	A20	1	0.716858	5	4.7	0.483046	4	3.7	1.33749	8.4	1.6703	0.751259	1.80061	1.66144	0.997167	0.542358	4.30429
02-01-03-02-01-02-21.mp4	VO	Speech	Happy	Strong	Kids	R2	A21	1	0.716858	5	4.2	1.13529	3	3.3	1.25167	7.5	1.51841	0.644693	1.78707	1.56434	0.794426	0.756176	3.93727
02-01-03-02-01-02-22.mp4	VO	Speech	Happy	Strong	Kids	R2	A22	0.9	0.645172	3.5	3.5	0.849837	3	3.2	0.788811	6.03	2.32769	1.42176	2.12555	1.21592	1.16114	0.53969	3.83717
02-01-03-02-01-02-23.mp4	VO	Speech	Happy	Strong	Kids	R2	A23	0.8	0.573486	3	3	1.05409	3	3.3	1.05935	5.04	2.06722	1.40315	0.927788	0.567866	0.409104	0.277959	3.20319
02-01-03-02-01-02-24.mp4	VO	Speech	Happy	Strong	Kids	R2	A24	1	0.716858	5	4.4	0.843274	4	3.6	1.3499	8	1.28941	0.557452	1.88325	0.772066	1.50003	1.07924	3.77044
02-01-03-02-02-01-01.mp4	VO	Speech	Happy	Strong	Dogs	R1	A1	1	0.716858	4.5	4.2	1.0328	4	3.9	1.19722	8.1	2.56456	0.860406	1.96676	1.91319	0.795926	0.461584	3.93725
02-01-03-02-02-01-02.mp4	VO	Speech	Happy	Strong	Dogs	R1	A2	0.8	0.573486	4	3.7	1.1595	3	3.3	1.49443	5.6	2.01241	0.831509	1.35076	1.17073	0.922936	0.833858	3.70371
02-01-03-02-02-01-03.mp4	VO	Speech	Happy	Strong	Dogs	R1	A3	0.4	0.286743	4	4.1	0.737865	4	3.7	1.1595	3.12	3.75424	2.15534	1.9646	0.991913	0.821188	0.697406	4.13746
02-01-03-02-02-01-04.mp4	VO	Speech	Happy	Strong	Dogs	R1	A4	0.8	0.573486	4	4	0.942809	3	3.3	1.41814	5.84	1.83285	0.590766	1.56747	1.58558	0.768088	0.513776	3.6036
02-01-03-02-02-01-05.mp4	VO	Speech	Happy	Strong	Dogs	R1	A5	0.9	0.645172	5	4.6	0.516398	3.5	3.3	1.33749	7.11	1.77977	0.693409	2.03219	1.28242	0.97529	0.474334	3.60358
02-01-03-02-02-01-06.mp4	VO	Speech	Happy	Strong	Dogs	R1	A6	1	0.716858	5	5	0	5	4.2	1.31656	9.2	2.37862	0.708673	1.48842	0.919072	0.985619	0.897092	3.57023
02-01-03-02-02-01-07.mp4	VO	Speech	Happy	Strong	Dogs	R1	A7	0.8	0.573486	4	4	1.05409	2.5	2.9	1.52388	5.52	2.28523	1.16435	1.80116	1.91669	0.486905	0.396435	4.03737
02-01-03-02-02-01-08.mp4	VO	Speech	Happy	Strong	Dogs	R1	A8	1	0.716858	4	4.3	0.674949	4	4.2	0.788811	8.5	2.05912	1.07835	1.55269	0.977006	0.864779	0.409072	3.83717
02-01-03-02-02-01-09.mp4	VO	Speech	Happy	Strong	Dogs	R1	A9	0.8	0.573486	4	4.1	0.994429	3.5	3.6	0.966092	6.16	2.67684	1.11646	1.96837	1.43157	1.16748	0.761389	3.57025
02-01-03-02-02-01-10.mp4	VO	Speech	Happy	Strong	Dogs	R1	A10	1	0.716858	4	3.9	1.19722	4	3.9	0.994429	7.8	2.91712	1.89328	1.69231	1.42183	1.48602	1.3524	3.73706
02-01-03-02-02-01-11.mp4	VO	Speech	Happy	Strong	Dogs	R1	A11	0.9	0.645172	3	3.3	1.41814	3.5	2.9	1.72884	5.58	3.17947	1.38109	2.56499	1.69774	1.06924	0.809055	3.87052
02-01-03-02-02-01-12.mp4	VO	Speech	Happy	Strong	Dogs	R1	A12	1	0.716858	5	4.6	0.516398	5	4.4	1.26491	9	1.838	0.799635	1.4089	1.2064	0.605899	0.487422	3.90392
02-01-03-02-02-01-13.mp4	VO	Speech	Happy	Strong	Dogs	R1	A13	1	0.716858	3.5	3.9	0.994429	2.5	2.9	1.37032	6.8	2.94074	1.83168	1.46613	1.1579	0.513307	0.501793	3.37002
02-01-03-02-02-01-14.mp4	VO	Speech	Happy	Strong	Dogs	R1	A14	0.9	0.645172	5	4.4	0.966092	4	4	1.24722	7.56	2.65933	1.53454	1.40503	1.05761	0.900198	0.92647	3.83717
02-01-03-02-02-01-15.mp4	VO	Speech	Happy	Strong	Dogs	R1	A15	0.9	0.645172	4	4	0.942809	4	4.3	0.674949	7.47	1.79822	1.10722	1.46969	1.34334	0.427539	0.319332	3.80379
02-01-03-02-02-01-16.mp4	VO	Speech	Happy	Strong	Dogs	R1	A16	0.9	0.645172	4.5	4.2	1.22927	4	3.7	1.41814	7.11	1.90796	0.864503	1.93065	1.36982	1.33791	1.05042	3.77042
02-01-03-02-02-01-17.mp4	VO	Speech	Happy	Strong	Dogs	R1	A17	0.7	0.5018	3	3.1	0.994429	3	3.1	1.19722	4.34	1.86212	1.47924	1.78572	1.4547	0.71557	0.64459	3.73706
02-01-03-02-02-01-18.mp4	VO	Speech	Happy	Strong	Dogs	R1	A18	1	0.716858	5	5	0	4.5	4.2	0.918937	9.2	1.59818	0.594214	1.78401	1.28139	1.10732	0.848692	3.77044
02-01-03-02-02-01-19.mp4	VO	Speech	Happy	Strong	Dogs	R1	A19	1	0.716858	4	4.3	0.674949	4	3.9	0.875595	8.2	1.80149	0.820302	1.90662	1.11348	0.832838	0.742322	4.4044
02-01-03-02-02-01-20.mp4	VO	Speech	Happy	Strong	Dogs	R1	A20	0.5	0.358429	4.5	4.4	0.699206	4	3.5	0.971825	3.95	2.74648	1.37702	1.7366	1.40581	1.16111	1.16052	3.57025
02-01-03-02-02-01-21.mp4	VO	Speech	Happy	Strong	Dogs	R1	A21	1	0.716858	4	3.7	0.674949	4.5	4.3	0.823273	8	1.75741	0.580321	1.84481	1.79765	1.02768	0.883102	3.67033
02-01-03-02-02-01-22.mp4	VO	Speech	Happy	Strong	Dogs	R1	A22	0.8	0.573486	4	4.3	0.674949	4	3.9	0.875595	6.56	1.9272	1.97541	1.56683	0.889994	1.16222	0.965544	3.67033
02-01-03-02-02-01-23.mp4	VO	Speech	Happy	Strong	Dogs	R1	A23	0.3	0.215057	4	3.8	0.918937	3.5	3.4	1.26491	2.16	1.95244	0.660597	1.87855	1.36247	0.647333	0.475898	3.23656
02-01-03-02-02-01-24.mp4	VO	Speech	Happy	Strong	Dogs	R1	A24	0.9	0.645172	5	4.7	0.483046	3.5	3.7	1.05935	7.56	2.4846	1.04977	1.57967	0.842358	1.06539	0.70075	3.87054
02-01-03-02-02-02-01.mp4	VO	Speech	Happy	Strong	Dogs	R2	A1	0.9	0.645172	5	4.6	0.516398	4	4	0.942809	7.74	1.65134	1.05618	1.24569	1.08292	0.481833	0.276913	3.93727
02-01-03-02-02-02-02.mp4	VO	Speech	Happy	Strong	Dogs	R2	A2	1	0.716858	4	3.9	0.737865	3.5	3.4	1.26491	7.3	1.69208	1.11885	1.83761	1.31591	1.31494	1.07643	3.87052
02-01-03-02-02-02-03.mp4	VO	Speech	Happy	Strong	Dogs	R2	A3	0.9	0.645172	4	3.7	1.1595	2.5	2.7	1.70294	5.76	2.27999	1.50473	1.33496	0.504888	1.10611	0.823375	3.83717
02-01-03-02-02-02-04.mp4	VO	Speech	Happy	Strong	Dogs	R2	A4	0.9	0.645172	4	4.3	0.674949	3	3.3	1.41814	6.84	1.58094	0.693832	1.48863	1.6621	0.769542	0.738513	3.77042
02-01-03-02-02-02-05.mp4	VO	Speech	Happy	Strong	Dogs	R2	A5	0.9	0.645172	4.5	4.4	0.699206	4	3.5	1.50923	7.11	1.53844	0.982743	1.2781	1.34543	0.851922	1.05134	3.4034
02-01-03-02-02-02-06.mp4	VO	Speech	Happy	Strong	Dogs	R2	A6	1	0.716858	5	4.6	0.516398	4	4	1.05409	8.6	2.34287	1.86076	1.50697	0.82102	1.06999	0.73114	3.60358
02-01-03-02-02-02-07.mp4	VO	Speech	Happy	Strong	Dogs	R2	A7	0.8	0.573486	4	3.6	1.50555	3	2.7	1.56702	5.04	1.45118	0.785339	1.18934	1.11287	0.467594	0.349876	3.83717
02-01-03-02-02-02-08.mp4	VO	Speech	Happy	Strong	Dogs	R2	A8	0.9	0.645172	4.5	4.4	0.699206	4.5	4	1.33333	7.56	1.69642	0.843274	1.29646	0.546311	1.08267	0.784648	3.93727
02-01-03-02-02-02-09.mp4	VO	Speech	Happy	Strong	Dogs	R2	A9	0.9	0.645172	4	4.4	0.516398	4	3.8	1.13529	7.38	2.23832	1.14132	1.5005	1.27592	0.749623	0.615927	3.57023
02-01-03-02-02-02-10.mp4	VO	Speech	Happy	Strong	Dogs	R2	A10	0.9	0.645172	4	4.1	0.994429	4	4	0.942809	7.29	1.62483	0.965947	1.06815	0.995659	0.691489	0.853939	3.97065
02-01-03-02-02-02-11.mp4	VO	Speech	Happy	Strong	Dogs	R2	A11	1	0.716858	4	3.5	0.849837	4	3.6	0.966092	7.1	1.33062	0.625717	2.56552	1.76694	1.09373	0.680759	3.5035
02-01-03-02-02-02-12.mp4	VO	Speech	Happy	Strong	Dogs	R2	A12	1	0.716858	4.5	4.5	0.527046	4.5	4.2	0.918937	8.7	1.95145	0.727635	1.89365	1.00043	1.15211	1.12518	3.97063
02-01-03-02-02-02-13.mp4	VO	Speech	Happy	Strong	Dogs	R2	A13	0.8	0.573486	4	4.1	0.737865	3.5	3	1.63299	5.68	1.512	0.598464	1.70361	1.59477	0.874333	0.516896	3.33667
02-01-03-02-02-02-14.mp4	VO	Speech	Happy	Strong	Dogs	R2	A14	0.9	0.645172	5	4.5	0.707107	4	3.9	1.19722	7.56	2.56736	1.67034	1.42929	1.47242	0.997979	0.716191	3.73706
02-01-03-02-02-02-15.mp4	VO	Speech	Happy	Strong	Dogs	R2	A15	1	0.716858	4	3.8	0.632456	4	3.7	1.1595	7.5	2.1383	1.17049	1.90555	1.41639	0.744283	0.425232	3.37004
02-01-03-02-02-02-16.mp4	VO	Speech	Happy	Strong	Dogs	R2	A16	1	0.716858	5	4.4	0.966092	4	3.7	1.49443	8.1	2.38201	1.16294	1.31061	0.802824	0.659155	0.684893	3.80381
02-01-03-02-02-02-17.mp4	VO	Speech	Happy	Strong	Dogs	R2	A17	0.8	0.573486	3	3	0.816497	3	2.6	1.07497	4.48	3.00811	1.91424	2.23818	1.46191	1.30736	1.32785	3.80379
02-01-03-02-02-02-18.mp4	VO	Speech	Happy	Strong	Dogs	R2	A18	0.9	0.645172	5	4.9	0.316228	4.5	4.1	1.1005	8.1	2.3006	1.51459	2.84502	1.92248	1.66418	1.35823	3.83717
02-01-03-02-02-02-19.mp4	VO	Speech	Happy	Strong	Dogs	R2	A19	0.9	0.645172	3	3.5	0.971825	4	3.6	0.843274	6.39	2.94315	1.90604	1.54991	1.29508	1.04232	0.952195	4.004
02-01-03-02-02-02-20.mp4	VO	Speech	Happy	Strong	Dogs	R2	A20	1	0.716858	5	4.7	0.674949	5	4.4	1.07497	9.1	1.79768	0.896574	0.965529	0.36715	0.479825	0.234737	3.70371
02-01-03-02-02-02-21.mp4	VO	Speech	Happy	Strong	Dogs	R2	A21	1	0.716858	4	3.9	0.994429	3	3.1	1.37032	7	1.94103	1.24053	1.88146	1.54547	0.856365	0.785769	3.80379
02-01-03-02-02-02-22.mp4	VO	Speech	Happy	Strong	Dogs	R2	A22	1	0.716858	4	3.7	0.823273	3	3	1.49071	6.7	1.53663	1.05206	1.65551	1.22326	0.753431	0.58418	3.93727
02-01-03-02-02-02-23.mp4	VO	Speech	Happy	Strong	Dogs	R2	A23	0.6	0.430115	4	4	0.666667	3	3.4	0.699206	4.44	1.73314	0.880854	1.43372	1.01506	1.04607	0.840808	3.23656
02-01-03-02-02-02-24.mp4	VO	Speech	Happy	Strong	Dogs	R2	A24	0.9	0.645172	5	4.6	0.699206	4	3.7	1.33749	7.47	2.65023	1.40505	1.61572	1.51114	0.735917	0.468215	3.87054
02-01-04-01-01-01-01.mp4	VO	Speech	Sad	Normal	Kids	R1	A1	0.7	0.481078	3	2.2	1.0328	3.5	3.5	0.849837	3.99	1.82196	0.888062	1.55277	1.07118	1.29182	0.888986	3.83717
02-01-04-01-01-01-02.mp4	VO	Speech	Sad	Normal	Kids	R1	A2	0.6	0.412353	2.5	2.5	1.50923	3	3	1.1547	3.3	2.39519	1.08553	0.999083	0.825067	0.754017	0.690105	3.83717
02-01-04-01-01-01-03.mp4	VO	Speech	Sad	Normal	Kids	R1	A3	1	0.687255	4	4.1	0.737865	4	3.9	1.37032	8	2.2509	1.46864	1.30064	0.986206	1.37452	1.14788	3.6036
02-01-04-01-01-01-04.mp4	VO	Speech	Sad	Normal	Kids	R1	A4	0.1	0.0687255	2.5	2.5	1.17851	2.5	2.7	1.1595	0.52	2.79505	1.59463	1.47895	0.860261	1.02059	0.716366	3.37004
02-01-04-01-01-01-05.mp4	VO	Speech	Sad	Normal	Kids	R1	A5	0.3	0.206176	3	3.2	1.54919	3	2.7	0.483046	1.77	2.68628	2.06954	1.36068	1.70521	1.19855	1.36822	3.26994
02-01-04-01-01-01-06.mp4	VO	Speech	Sad	Normal	Kids	R1	A6	1	0.687255	4	3.6	1.07497	3	3.4	0.843274	7	1.8343	0.828907	1.89338	0.885982	1.06718	1.02412	3.57023
02-01-04-01-01-01-07.mp4	VO	Speech	Sad	Normal	Kids	R1	A7	0.8	0.549804	3	3.4	0.516398	3	3.2	1.0328	5.28	1.76318	1.18037	1.53286	1.13261	0.773654	0.463519	3.53688
02-01-04-01-01-01-08.mp4	VO	Speech	Sad	Normal	Kids	R1	A8	0.8	0.549804	2.5	2.7	1.25167	3	2.9	1.19722	4.48	2.88456	1.79561	1.1943	0.572661	0.80077	0.486449	4.20421
02-01-04-01-01-01-09.mp4	VO	Speech	Sad	Normal	Kids	R1	A9	0.8	0.549804	3.5	3.4	0.699206	4	4	0.816497	5.92	3.11166	1.12421	1.66528	0.703326	1.10102	0.781773	3.26994
02-01-04-01-01-01-10.mp4	VO	Speech	Sad	Normal	Kids	R1	A10	0.9	0.618529	3.5	3.4	0.699206	3	3.2	0.788811	5.94	2.52731	1.51455	1.81166	1.47422	1.07918	1.37849	3.30329
02-01-04-01-01-01-11.mp4	VO	Speech	Sad	Normal	Kids	R1	A11	0.1	0.0687255	2.5	2.5	1.35401	3.5	3.1	1.37032	0.56	2.50315	2.04903	1.48452	1.08516	0.828685	0.84769	3.33667
02-01-04-01-01-01-12.mp4	VO	Speech	Sad	Normal	Kids	R1	A12	0.9	0.618529	3	3.1	0.875595	3.5	3.5	0.849837	5.94	3.09917	2.41554	1.67643	1.48074	0.64373	0.419274	3.67033
02-01-04-01-01-01-13.mp4	VO	Speech	Sad	Normal	Kids	R1	A13	0.2	0.137451	2.5	2.5	1.08012	3	2.9	0.875595	1.08	3.59855	2.0866	1.9748	0.599898	1.44121	0.88443	3.57023
02-01-04-01-01-01-14.mp4	VO	Speech	Sad	Normal	Kids	R1	A14	0.4	0.274902	3	3	1.33333	3	3.1	0.875595	2.44	1.72843	0.751279	1.89231	1.15006	0.789277	0.415229	3.73706
02-01-04-01-01-01-15.mp4	VO	Speech	Sad	Normal	Kids	R1	A15	0.4	0.274902	3	3.1	1.28668	3.5	3.3	1.33749	2.56	2.07468	1.5214	1.69368	0.975117	1.2669	0.803187	3.5035
02-01-04-01-01-01-16.mp4	VO	Speech	Sad	Normal	Kids	R1	A16	0.1	0.0687255	3	3	1.05409	3	3.4	0.966092	0.64	2.90649	2.19667	1.96649	1.92536	1.13105	0.882782	3.57023
02-01-04-01-01-01-17.mp4	VO	Speech	Sad	Normal	Kids	R1	A17	0.7	0.481078	3	3.2	0.632456	3.5	3.4	0.966092	4.62	1.87213	1.12946	2.43517	1.55304	1.28172	0.880442	3.67033
02-01-04-01-01-01-18.mp4	VO	Speech	Sad	Normal	Kids	R1	A18	0.8	0.549804	3	2.9	0.737865	3	2.8	1.0328	4.56	1.89422	1.65524	1.84635	0.813119	0.854061	0.574674	3.57023
02-01-04-01-01-01-19.mp4	VO	Speech	Sad	Normal	Kids	R1	A19	0.6	0.412353	3	2.9	0.994429	3	3.4	1.17379	3.78	2.94798	1.15262	1.65517	0.842911	0.794926	0.508773	3.43677
02-01-04-01-01-01-20.mp4	VO	Speech	Sad	Normal	Kids	R1	A20	0.4	0.274902	3	2.9	1.37032	3	3.2	1.39841	2.44	2.92626	1.03458	2.32761	1.88924	1.31053	0.971581	3.60358
02-01-04-01-01-01-21.mp4	VO	Speech	Sad	Normal	Kids	R1	A21	0.1	0.0687255	2	2.5	0.971825	2.5	2.6	1.17379	0.51	2.26375	1.54864	1.94581	2.1348	0.756614	0.858506	4.30429
02-01-04-01-01-01-22.mp4	VO	Speech	Sad	Normal	Kids	R1	A22	0.4	0.274902	3	3.1	1.37032	3	3.2	1.47573	2.52	2.16164	1.74221	1.35619	1.00959	0.570137	0.443822	3.6036
02-01-04-01-01-01-23.mp4	VO	Speech	Sad	Normal	Kids	R1	A23	0.3	0.206176	2	2	0.666667	3	2.7	0.483046	1.41	4.57692	1.83676	2.07501	1.03406	1.63882	1.2066	3.6036
02-01-04-01-01-01-24.mp4	VO	Speech	Sad	Normal	Kids	R1	A24	0.9	0.618529	4	3.7	1.05935	3.5	3.4	1.26491	6.39	1.63849	1.15754	1.85796	1.34258	1.08836	0.952225	4.1041
02-01-04-01-01-02-01.mp4	VO	Speech	Sad	Normal	Kids	R2	A1	0.9	0.618529	3	3.4	1.17379	3.5	3.6	1.42984	6.3	2.36805	1.34573	2.444	1.75196	0.88408	0.704633	3.57023
02-01-04-01-01-02-02.mp4	VO	Speech	Sad	Normal	Kids	R2	A2	0.7	0.481078	3	2.8	1.13529	4	3.6	1.17379	4.48	3.00734	1.84168	1.80807	1.14355	0.787995	0.577841	3.77044
02-01-04-01-01-02-03.mp4	VO	Speech	Sad	Normal	Kids	R2	A3	0.8	0.549804	4	4	0.942809	3.5	3.5	1.35401	6	2.17318	1.45171	2.09571	1.29476	1.01727	0.811965	3.57023
02-01-04-01-01-02-04.mp4	VO	Speech	Sad	Normal	Kids	R2	A4	0.7	0.481078	3	3.3	1.33749	3	3	1.1547	4.41	2.19464	1.33086	1.48157	0.917204	0.824093	0.806888	3.4034
02-01-04-01-01-02-05.mp4	VO	Speech	Sad	Normal	Kids	R2	A5	0.6	0.412353	2	2.6	1.3499	3	3.2	1.22927	3.48	2.22675	1.17581	1.78442	1.03988	1.40025	0.752056	3.63696
02-01-04-01-01-02-06.mp4	VO	Speech	Sad	Normal	Kids	R2	A6	1	0.687255	4	4.1	0.737865	4	4	0.942809	8.1	2.20208	0.937475	2.3266	1.26702	1.18316	0.772342	3.6036
02-01-04-01-01-02-07.mp4	VO	Speech	Sad	Normal	Kids	R2	A7	0.9	0.618529	3	3	1.1547	4	3.7	1.33749	6.03	2.21416	1.51344	2.34273	1.72419	1.59017	0.9456	3.60358
02-01-04-01-01-02-08.mp4	VO	Speech	Sad	Normal	Kids	R2	A8	0.7	0.481078	2.5	2.5	1.2693	3.5	3	1.24722	3.85	1.96141	0.663931	1.4921	1.3837	0.878134	0.60629	3.87052
02-01-04-01-01-02-09.mp4	VO	Speech	Sad	Normal	Kids	R2	A9	0.7	0.481078	3	3.2	0.632456	3	3.5	0.971825	4.69	2.67933	1.94322	1.77562	0.901643	1.24087	1.04696	3.43675
02-01-04-01-01-02-10.mp4	VO	Speech	Sad	Normal	Kids	R2	A10	0.9	0.618529	3	3.2	1.0328	3.5	3.7	1.05935	6.21	1.87544	0.858909	1.70201	0.951268	1.0501	0.84775	3.47012
02-01-04-01-01-02-11.mp4	VO	Speech	Sad	Normal	Kids	R2	A11	0.1	0.0687255	3	3	1.33333	4	3.2	1.39841	0.62	2.24227	1.61747	1.92891	1.6871	1.35353	1.34695	3.6036
02-01-04-01-01-02-12.mp4	VO	Speech	Sad	Normal	Kids	R2	A12	0.9	0.618529	3.5	3.6	0.699206	4	3.6	1.3499	6.48	1.73738	0.605143	1.58042	0.943856	0.987494	0.890155	3.60358
02-01-04-01-01-02-13.mp4	VO	Speech	Sad	Normal	Kids	R2	A13	0.2	0.137451	2	2.4	1.50555	3	3.4	1.3499	1.16	2.42079	1.42816	1.45478	0.851457	1.40636	0.930864	3.53685
02-01-04-01-01-02-14.mp4	VO	Speech	Sad	Normal	Kids	R2	A14	0.6	0.412353	3	2.7	0.674949	4	3.5	1.2693	3.72	2.33576	1.4347	1.28154	0.816602	1.01017	0.907323	3.6036
02-01-04-01-01-02-15.mp4	VO	Speech	Sad	Normal	Kids	R2	A15	0.3	0.206176	2.5	2.8	1.39841	3	2.8	1.13529	1.68	2.32529	1.65263	1.66075	1.45159	0.930186	0.549022	3.30329
02-01-04-01-01-02-16.mp4	VO	Speech	Sad	Normal	Kids	R2	A16	0.7	0.481078	3	2.7	0.948683	2.5	2.6	0.966092	3.71	1.5992	0.752988	1.65158	0.98648	0.901968	0.806312	3.63696
02-01-04-01-01-02-17.mp4	VO	Speech	Sad	Normal	Kids	R2	A17	0.7	0.481078	3	2.7	0.823273	3.5	3.3	0.823273	4.2	2.05571	1.76145	0.9589	0.666734	0.747314	0.770706	3.5035
02-01-04-01-01-02-18.mp4	VO	Speech	Sad	Normal	Kids	R2	A18	0.8	0.549804	3	3.5	0.707107	3	2.9	1.44914	5.12	1.57114	1.46382	1.7112	1.76882	1.22021	1.35717	3.63696
02-01-04-01-01-02-19.mp4	VO	Speech	Sad	Normal	Kids	R2	A19	0.4	0.274902	2	2.4	0.843274	3	2.7	1.05935	2.04	2.32568	0.932939	1.63313	1.82339	1.34406	1.0834	3.67033
02-01-04-01-01-02-20.mp4	VO	Speech	Sad	Normal	Kids	R2	A20	0	0	3	3.1	1.19722	2.5	2.9	1.37032	0	2.98293	1.48587	2.36722	1.88542	1.28489	1.21833	3.5035
02-01-04-01-01-02-21.mp4	VO	Speech	Sad	Normal	Kids	R2	A21	0.1	0.0687255	3	3	1.05409	3	2.8	1.31656	0.58	2.89789	1.85112	2.00486	1.54504	1.1023	0.680514	4.6046
02-01-04-01-01-02-22.mp4	VO	Speech	Sad	Normal	Kids	R2	A22	0.1	0.0687255	3	3.4	1.3499	3.5	3.6	1.26491	0.7	2.69311	1.91922	1.71076	0.840135	1.24504	0.896716	3.70371
02-01-04-01-01-02-23.mp4	VO	Speech	Sad	Normal	Kids	R2	A23	0.2	0.137451	2	2.2	1.0328	3	2.8	1.22927	1	3.24385	1.8832	2.16005	0.823517	1.67275	1.08282	3.87054
02-01-04-01-01-02-24.mp4	VO	Speech	Sad	Normal	Kids	R2	A24	0.9	0.618529	3	3.3	1.05935	3.5	3.2	1.39841	5.85	2.57929	1.24118	1.86007	0.955229	1.05044	0.832012	3.97063
02-01-04-01-02-01-01.mp4	VO	Speech	Sad	Normal	Dogs	R1	A1	0.2	0.137451	3	2.9	0.994429	3	3.1	0.994429	1.2	2.19789	1.71342	1.49788	0.912743	0.66009	0.547918	3.5035
02-01-04-01-02-01-02.mp4	VO	Speech	Sad	Normal	Dogs	R1	A2	0.2	0.137451	2.5	2.4	1.26491	3.5	3.3	1.1595	1.14	2.09257	1.07164	0.797412	0.67989	1.35619	0.910647	3.73706
02-01-04-01-02-01-03.mp4	VO	Speech	Sad	Normal	Dogs	R1	A3	0.9	0.618529	4	3.8	0.918937	4	3.7	0.948683	6.75	2.11307	1.4997	1.79077	1.76948	1.1971	1.24498	3.57023
02-01-04-01-02-01-04.mp4	VO	Speech	Sad	Normal	Dogs	R1	A4	0.5	0.343627	3	3.1	1.19722	4	4	0.942809	3.55	2.65328	1.6832	0.999594	1.01484	0.537572	0.388009	3.43677
02-01-04-01-02-01-05.mp4	VO	Speech	Sad	Normal	Dogs	R1	A5	0.4	0.274902	3.5	3.2	1.39841	3.5	3.5	1.35401	2.68	1.75475	1.16606	1.38184	0.92788	0.67624	0.684378	3.1031
02-01-04-01-02-01-06.mp4	VO	Speech	Sad	Normal	Dogs	R1	A6	0.8	0.549804	3.5	3.5	1.2693	2.5	2.8	1.47573	5.04	1.67194	0.779507	1.99281	1.66202	1.06892	0.673131	3.47015
02-01-04-01-02-01-07.mp4	VO	Speech	Sad	Normal	Dogs	R1	A7	0.7	0.481078	4	3.7	1.1595	4	3.8	1.13529	5.25	2.20265	2.5477	1.78245	0.93712	0.676706	0.590295	3.53688
02-01-04-01-02-01-08.mp4	VO	Speech	Sad	Normal	Dogs	R1	A8	0.1	0.0687255	3	2.9	0.875595	3	2.6	1.26491	0.55	3.47858	2.164	1.47383	1.12801	1.02308	0.552045	3.57025
02-01-04-01-02-01-09.mp4	VO	Speech	Sad	Normal	Dogs	R1	A9	0.6	0.412353	3	3.2	1.22927	3	3.3	1.25167	3.9	2.08334	1.60565	1.56764	0.835144	0.938049	1.03922	3.4034
02-01-04-01-02-01-10.mp4	VO	Speech	Sad	Normal	Dogs	R1	A10	0.9	0.618529	3	3.2	1.31656	3	3	1.49071	5.58	1.49899	1.26347	1.83484	1.54767	0.759941	0.615931	3.53688
02-01-04-01-02-01-11.mp4	VO	Speech	Sad	Normal	Dogs	R1	A11	0.1	0.0687255	3	2.7	1.05935	1.5	2	1.24722	0.47	1.99705	1.77062	1.68943	1.75981	1.10531	1.25307	3.53685
02-01-04-01-02-01-12.mp4	VO	Speech	Sad	Normal	Dogs	R1	A12	0.8	0.549804	3	2.7	0.948683	3.5	3.3	1.05935	4.8	1.87182	0.89317	1.31931	0.538302	1.00228	0.658863	3.67033
02-01-04-01-02-01-13.mp4	VO	Speech	Sad	Normal	Dogs	R1	A13	0.3	0.206176	3.5	3.5	0.849837	3	3.3	1.25167	2.04	2.64416	1.07603	2.14424	1.92256	0.863321	0.680716	3.43677
02-01-04-01-02-01-14.mp4	VO	Speech	Sad	Normal	Dogs	R1	A14	0.5	0.343627	2.5	2.6	0.966092	3	3	1.05409	2.8	1.84689	1.2516	1.11332	0.795075	0.901459	0.665308	3.6036
02-01-04-01-02-01-15.mp4	VO	Speech	Sad	Normal	Dogs	R1	A15	0.5	0.343627	3	2.8	0.788811	3.5	3.4	1.07497	3.1	2.71299	2.43999	2.20083	1.82929	0.696129	0.588562	3.30331
02-01-04-01-02-01-16.mp4	VO	Speech	Sad	Normal	Dogs	R1	A16	0.5	0.343627	3	2.9	0.737865	3.5	3.4	0.699206	3.15	2.53337	1.9271	1.22453	0.944323	1.27228	0.777355	3.40342
02-01-04-01-02-01-17.mp4	VO	Speech	Sad	Normal	Dogs	R1	A17	0.4	0.274902	3	2.9	0.994429	3	3.5	0.971825	2.56	1.39747	0.735924	1.4316	1.42845	0.750725	0.711767	3.57023
02-01-04-01-02-01-18.mp4	VO	Speech	Sad	Normal	Dogs	R1	A18	1	0.687255	2.5	2.3	0.823273	3	2.8	1.0328	5.1	2.25591	1.24689	2.84816	2.13056	1.16445	0.534895	3.53688
02-01-04-01-02-01-19.mp4	VO	Speech	Sad	Normal	Dogs	R1	A19	0.7	0.481078	3	3.2	1.22927	4	3.9	1.1005	4.97	2.39433	1.7167	1.20879	0.933313	1.28838	0.74989	3.16983
02-01-04-01-02-01-20.mp4	VO	Speech	Sad	Normal	Dogs	R1	A20	0.4	0.274902	3	3.4	0.966092	4	3.8	1.0328	2.88	2.96581	1.87128	2.09109	1.40054	1.76415	1.32607	3.47012
02-01-04-01-02-01-21.mp4	VO	Speech	Sad	Normal	Dogs	R1	A21	0.1	0.0687255	1.5	2.2	1.47573	2.5	2.2	1.13529	0.44	2.81999	2.12653	1.26657	0.45733	0.915646	0.495433	4.07075
02-01-04-01-02-01-22.mp4	VO	Speech	Sad	Normal	Dogs	R1	A22	0.4	0.274902	2	2.2	1.0328	3	3	1.1547	2.08	3.44191	2.46887	1.25089	1.09086	1.012	0.819412	3.67033
02-01-04-01-02-01-23.mp4	VO	Speech	Sad	Normal	Dogs	R1	A23	0.2	0.137451	3	3.2	0.788811	3	3	1.1547	1.24	3.42931	1.69442	2.5926	2.12146	1.19164	0.797339	3.57023
02-01-04-01-02-01-24.mp4	VO	Speech	Sad	Normal	Dogs	R1	A24	0.8	0.549804	3	2.9	1.37032	3	3.1	1.19722	4.8	2.18687	1.17534	1.57318	0.731548	1.65854	1.2415	3.53688
02-01-04-01-02-02-01.mp4	VO	Speech	Sad	Normal	Dogs	R2	A1	0.5	0.343627	2	2.7	1.25167	3	3.2	1.13529	2.95	2.32764	1.83958	2.03892	1.42199	1.14898	0.742182	3.37004
02-01-04-01-02-02-02.mp4	VO	Speech	Sad	Normal	Dogs	R2	A2	0.6	0.412353	2	2.4	1.07497	3	2.8	1.47573	3.12	2.34956	1.79259	1.80026	1.21998	1.25288	0.683168	3.77044
02-01-04-01-02-02-03.mp4	VO	Speech	Sad	Normal	Dogs	R2	A3	1	0.687255	5	4.3	0.948683	4	4	1.1547	8.3	1.28201	0.652201	1.77018	1.47075	0.700837	0.583687	3.53688
02-01-04-01-02-02-04.mp4	VO	Speech	Sad	Normal	Dogs	R2	A4	0.4	0.274902	4	3.9	0.737865	4	3.8	0.918937	3.08	2.2236	0.82872	1.70035	1.21815	1.85595	1.50086	3.47012
02-01-04-01-02-02-05.mp4	VO	Speech	Sad	Normal	Dogs	R2	A5	0.3	0.206176	3.5	3.4	1.07497	3	3.3	1.25167	2.01	2.50842	1.63013	1.86463	1.19972	1.19596	0.618782	3.70369
02-01-04-01-02-02-06.mp4	VO	Speech	Sad	Normal	Dogs	R2	A6	0.8	0.549804	3.5	3.4	1.42984	3.5	3.5	1.08012	5.52	1.73333	0.635311	1.52742	1.16958	0.769002	0.653533	3.43677
[truncated: 2,322 more rows]

## Sheet: Song
	Independent Variables							Dependent Variables
Filename	Modality	Channel	Emotion	Intensity	Statement	Repetition	Actor	PropCorr	UHR	Intensity(Med)	Intensity(M)	Intensity(SD)	Genuineness(Med)	Genuineness(M)	Genuineness(SD)	Goodness	EmoCategoryRespTime(M, Sec)	EmoCategoryRespTime(SD)	IntensityRespTime(M, Sec)	IntensityRespTime(SD)	GenuinenessRespTime(M, Sec)	GenuinenessRespTime(SD)	FileDuration(Sec)
01-02-01-01-01-01-01.mp4	AV	Song	Neutral	Normal	Kids	R1	A1	0.8	0.54763	2.5	2.6	1.26491	3	3.1	1.44914	8	2.41059	1.5119	1.33057	0.897035	0.898688	0.758672	4.23758
01-02-01-01-01-01-02.mp4	AV	Song	Neutral	Normal	Kids	R1	A2	0.8	0.54763	2.5	2.5	1.08012	3.5	3.3	1.33749	8	1.68246	1.24479	1.43723	0.975659	0.87915	0.687781	4.83817
01-02-01-01-01-01-03.mp4	AV	Song	Neutral	Normal	Kids	R1	A3	0.5	0.342269	3.5	3.5	1.50923	3.5	3.7	1.25167	5	1.83222	1.31083	1.74176	1.45859	0.900295	0.911713	4.47115
01-02-01-01-01-01-04.mp4	AV	Song	Neutral	Normal	Kids	R1	A4	1	0.684538	3.5	3.7	0.823273	3.5	3.8	1.13529	10	1.9216	2.14763	1.58784	1.35658	0.904976	0.674514	4.37104
01-02-01-01-01-01-05.mp4	AV	Song	Neutral	Normal	Kids	R1	A5	1	0.684538	4	3.5	1.17851	4	3.6	1.17379	10	1.49631	1.11212	1.9335	1.66046	0.978435	0.859871	4.63796
01-02-01-01-01-01-06.mp4	AV	Song	Neutral	Normal	Kids	R1	A6	0.6	0.410723	3	3.3	1.05935	3.5	3.5	1.17851	6	2.12701	1.14145	2.70428	1.17921	1.59349	1.34134	4.67133
01-02-01-01-01-01-07.mp4	AV	Song	Neutral	Normal	Kids	R1	A7	0.8	0.54763	3	3.1	1.19722	3	3.2	1.47573	8	3.11284	1.79972	2.31591	1.153	1.50639	0.883453	4.30429
01-02-01-01-01-01-08.mp4	AV	Song	Neutral	Normal	Kids	R1	A8	1	0.684538	3	2.9	1.28668	3.5	3.6	1.26491	10	1.1693	0.723594	1.23736	0.634609	1.11659	0.878165	4.67133
01-02-01-01-01-01-09.mp4	AV	Song	Neutral	Normal	Kids	R1	A9	0.9	0.616084	3.5	3.2	1.47573	3.5	3.3	1.56702	9	1.3582	1.48241	1.28625	1.29626	1.04591	0.928842	4.1041
01-02-01-01-01-01-10.mp4	AV	Song	Neutral	Normal	Kids	R1	A10	0.8	0.54763	4	3.9	0.875595	3	3.3	1.05935	8	1.2447	0.543268	1.0762	0.779425	0.817519	0.584402	4.93827
01-02-01-01-01-01-11.mp4	AV	Song	Neutral	Normal	Kids	R1	A11	0.7	0.479176	3.5	3.3	1.49443	4.5	3.9	1.28668	7	1.4775	0.652876	1.41297	1.62315	0.582347	0.589493	4.07073
01-02-01-01-01-01-12.mp4	AV	Song	Neutral	Normal	Kids	R1	A12	0.8	0.54763	3	3.2	1.0328	3	2.6	1.07497	8	2.80584	2.63434	1.75169	1.13886	1.38445	1.15956	4.17083
01-02-01-01-01-01-13.mp4	AV	Song	Neutral	Normal	Kids	R1	A13	0.9	0.616084	3	3	1.1547	3	3	0.666667	9	1.69116	1.64545	1.70853	0.746811	1.29464	1.16151	4.33767
01-02-01-01-01-01-14.mp4	AV	Song	Neutral	Normal	Kids	R1	A14	0.8	0.54763	2	2.4	1.3499	2.5	3	1.24722	8	2.34525	1.44003	2.66196	1.34761	1.37279	1.16085	4.30431
01-02-01-01-01-01-15.mp4	AV	Song	Neutral	Normal	Kids	R1	A15	0.8	0.54763	3	3	1.56347	4	3.5	1.64992	8	1.83394	1.54155	1.50672	1.07366	0.89952	0.498523	4.47115
01-02-01-01-01-01-16.mp4	AV	Song	Neutral	Normal	Kids	R1	A16	0.8	0.54763	3	3	1.41421	2.5	2.6	1.64655	8	1.93135	1.11584	1.82289	1.13948	1.12899	0.775668	4.87152
01-02-01-01-01-01-17.mp4	AV	Song	Neutral	Normal	Kids	R1	A17	0.9	0.616084	3	3	1.41421	3	2.8	1.22927	9	2.19472	2.0098	1.55049	1.23103	0.871034	0.83284	5.03835
01-02-01-01-01-01-19.mp4	AV	Song	Neutral	Normal	Kids	R1	A19	1	0.684538	3	2.8	1.22927	3	2.8	1.22927	10	1.65078	1.34623	1.48989	0.996441	1.34864	0.897835	4.53787
01-02-01-01-01-01-20.mp4	AV	Song	Neutral	Normal	Kids	R1	A20	0.9	0.616084	3.5	3.5	1.08012	3	3.4	0.843274	9	2.50407	1.7571	1.36913	0.817239	1.07632	0.720313	4.80481
01-02-01-01-01-01-21.mp4	AV	Song	Neutral	Normal	Kids	R1	A21	0.8	0.54763	1.5	2.4	1.7127	2.5	2.4	1.42984	8	1.83078	1.45998	1.59519	2.03934	1.04576	1.27972	4.30429
01-02-01-01-01-01-22.mp4	AV	Song	Neutral	Normal	Kids	R1	A22	0.7	0.479176	3.5	3.6	1.42984	4	3.9	0.994429	7	1.66396	1.41902	2.2024	2.01071	0.779316	0.596883	4.73806
01-02-01-01-01-01-23.mp4	AV	Song	Neutral	Normal	Kids	R1	A23	0.9	0.616084	3	2.9	1.44914	3	3	1.49071	9	1.20361	0.342109	1.60926	1.09418	0.760893	0.69595	4.4044
01-02-01-01-01-01-24.mp4	AV	Song	Neutral	Normal	Kids	R1	A24	0.7	0.479176	3	3.2	1.0328	3	3.1	1.28668	7	1.95619	1.23154	1.62586	0.799686	1.01483	1.15192	4.77144
01-02-01-01-01-02-01.mp4	AV	Song	Neutral	Normal	Kids	R2	A1	1	0.684538	3.5	3.1	1.37032	4	3.4	1.17379	10	1.32699	0.574109	1.92878	1.24688	1.12401	0.511889	4.27092
01-02-01-01-01-02-02.mp4	AV	Song	Neutral	Normal	Kids	R2	A2	0.9	0.616084	3	3.3	1.25167	4	4.1	0.875595	9	1.6615	1.00521	1.2759	0.824848	0.68452	0.608672	5.1051
01-02-01-01-01-02-03.mp4	AV	Song	Neutral	Normal	Kids	R2	A3	0.5	0.342269	2.5	2.3	1.05935	2.5	2.6	1.3499	5	2.79706	1.97169	1.95192	2.04394	0.972527	1.08252	4.43775
01-02-01-01-01-02-04.mp4	AV	Song	Neutral	Normal	Kids	R2	A4	1	0.684538	3.5	3.4	1.42984	4	3.8	1.39841	10	1.35974	0.691006	1.50265	1.1696	0.836173	0.492116	4.27092
01-02-01-01-01-02-05.mp4	AV	Song	Neutral	Normal	Kids	R2	A5	0.9	0.616084	4	3.6	1.3499	3.5	3.2	1.47573	9	1.3242	0.99406	1.33311	0.981578	0.876267	0.71633	4.6046
01-02-01-01-01-02-06.mp4	AV	Song	Neutral	Normal	Kids	R2	A6	0.9	0.616084	3	3.7	0.948683	4	3.9	0.994429	9	1.68386	1.09111	1.29298	1.23194	0.82877	0.784993	4.80481
01-02-01-01-01-02-07.mp4	AV	Song	Neutral	Normal	Kids	R2	A7	0.7	0.479176	3	2.8	1.0328	3	3	1.05409	7	2.06821	1.58438	2.56422	1.60068	1.0704	0.529653	4.27094
01-02-01-01-01-02-08.mp4	AV	Song	Neutral	Normal	Kids	R2	A8	0.8	0.54763	4	3.4	0.843274	3	3.1	0.875595	8	1.85168	1.31091	1.75953	1.21173	1.13113	1.04769	4.73806
01-02-01-01-01-02-09.mp4	AV	Song	Neutral	Normal	Kids	R2	A9	1	0.684538	3	3.3	1.25167	3	2.8	1.31656	10	2.11763	1.44998	2.00358	0.564301	1.28789	1.35065	4.37102
01-02-01-01-01-02-10.mp4	AV	Song	Neutral	Normal	Kids	R2	A10	0.5	0.342269	4	3.7	0.948683	4	3.7	0.948683	5	2.19797	1.28631	1.76906	0.735282	0.792406	0.420085	4.90492
01-02-01-01-01-02-11.mp4	AV	Song	Neutral	Normal	Kids	R2	A11	0.8	0.54763	3	3	1.33333	3	3	1.49071	8	1.37383	0.936066	1.06437	1.27976	1.05551	0.947128	4.03737
01-02-01-01-01-02-12.mp4	AV	Song	Neutral	Normal	Kids	R2	A12	0.6	0.410723	3	3.2	0.788811	3	3.2	1.13529	6	1.94448	0.709402	2.10859	1.90552	1.23192	0.907363	4.70471
01-02-01-01-01-02-13.mp4	AV	Song	Neutral	Normal	Kids	R2	A13	0.8	0.54763	3	2.7	1.1595	3	3.2	1.31656	8	2.0614	1.65473	1.70526	1.6452	1.27331	1.4235	4.33767
01-02-01-01-01-02-14.mp4	AV	Song	Neutral	Normal	Kids	R2	A14	1	0.684538	3	2.8	1.0328	3	3.1	0.994429	10	1.87783	1.1731	1.12165	0.644873	0.833539	0.649528	4.4044
01-02-01-01-01-02-15.mp4	AV	Song	Neutral	Normal	Kids	R2	A15	0.8	0.54763	3	2.9	1.28668	4	3.4	1.17379	8	1.98917	1.66341	1.46955	0.817855	1.00104	1.14023	4.23756
01-02-01-01-01-02-16.mp4	AV	Song	Neutral	Normal	Kids	R2	A16	0.8	0.54763	3	2.6	1.07497	2.5	2.5	0.527046	8	2.61209	1.7239	2.04229	1.61471	1.35384	1.36453	4.57125
01-02-01-01-01-02-17.mp4	AV	Song	Neutral	Normal	Kids	R2	A17	1	0.684538	3	3.3	0.823273	3.5	3.7	1.05935	10	1.32836	0.831969	1.75846	0.955085	0.855849	0.729435	4.80479
01-02-01-01-01-02-19.mp4	AV	Song	Neutral	Normal	Kids	R2	A19	0.9	0.616084	3	2.7	1.05935	3	2.6	1.26491	9	1.64389	1.896	2.30493	1.43784	1.71	1.24733	4.33767
01-02-01-01-01-02-20.mp4	AV	Song	Neutral	Normal	Kids	R2	A20	1	0.684538	4	3.7	0.674949	4	3.6	0.843274	10	2.44793	1.91676	1.24828	0.746904	0.701238	0.464526	4.67133
01-02-01-01-01-02-21.mp4	AV	Song	Neutral	Normal	Kids	R2	A21	1	0.684538	3	3	1.05409	3.5	3.3	1.1595	10	2.03957	1.53344	2.49623	1.93715	1.5417	0.997127	4.37102
01-02-01-01-01-02-22.mp4	AV	Song	Neutral	Normal	Kids	R2	A22	0.8	0.54763	3	3	1.24722	3	3.3	1.25167	8	2.97463	2.24598	1.7629	0.756268	1.73448	0.736083	4.67133
01-02-01-01-01-02-23.mp4	AV	Song	Neutral	Normal	Kids	R2	A23	1	0.684538	4	3.6	1.50555	4	3.9	0.875595	10	1.19865	0.306669	2.17328	1.21229	1.75673	1.19305	4.43777
01-02-01-01-01-02-24.mp4	AV	Song	Neutral	Normal	Kids	R2	A24	0.5	0.342269	2	2.3	1.49443	2.5	2.7	1.49443	5	2.69489	1.82009	1.0132	0.578044	1.44074	1.27297	4.73806
01-02-01-01-02-01-01.mp4	AV	Song	Neutral	Normal	Dogs	R1	A1	0.8	0.54763	3	2.8	1.22927	3	2.7	1.25167	8	1.96397	1.46248	1.37093	0.897327	0.748338	0.541087	4.17083
01-02-01-01-02-01-02.mp4	AV	Song	Neutral	Normal	Dogs	R1	A2	0.8	0.54763	2.5	2.6	0.966092	3	3.3	1.05935	8	2.23205	1.31805	1.87606	1.00747	1.47723	1.14526	4.87154
01-02-01-01-02-01-03.mp4	AV	Song	Neutral	Normal	Dogs	R1	A3	0.8	0.54763	3	2.6	1.17379	3	2.8	1.22927	8	2.49077	2.10217	1.67621	1.27802	1.06073	1.22018	4.37104
01-02-01-01-02-01-04.mp4	AV	Song	Neutral	Normal	Dogs	R1	A4	1	0.684538	3	3.2	1.31656	4	3.7	1.41814	10	1.68227	1.50507	1.91805	0.922007	1.06655	1.11728	4.30429
01-02-01-01-02-01-05.mp4	AV	Song	Neutral	Normal	Dogs	R1	A5	0.9	0.616084	3.5	3.3	1.05935	3	3	1.05409	9	1.29373	0.586468	1.1285	1.03973	0.730213	0.811651	4.67133
01-02-01-01-02-01-06.mp4	AV	Song	Neutral	Normal	Dogs	R1	A6	0.7	0.479176	3	2.8	0.918937	4	3.7	0.948683	7	1.87829	1.22957	1.83692	1.11882	0.98071	0.626497	4.63796
01-02-01-01-02-01-07.mp4	AV	Song	Neutral	Normal	Dogs	R1	A7	1	0.684538	3.5	3.5	1.35401	3	2.9	1.66333	10	1.60875	1.17386	1.92971	1.72332	1.11377	1.01285	4.4044
01-02-01-01-02-01-08.mp4	AV	Song	Neutral	Normal	Dogs	R1	A8	1	0.684538	3	2.7	1.33749	3	2.8	1.22927	10	1.54266	0.945216	2.30175	1.37104	1.91132	1.16676	4.70469
01-02-01-01-02-01-09.mp4	AV	Song	Neutral	Normal	Dogs	R1	A9	1	0.684538	3	2.7	1.05935	3	3.3	0.674949	10	1.0188	0.627916	1.89495	1.3654	0.93995	0.616157	4.23756
01-02-01-01-02-01-10.mp4	AV	Song	Neutral	Normal	Dogs	R1	A10	0.6	0.410723	3	3.2	0.788811	3	3.2	0.788811	6	2.0065	1.6736	1.88925	1.3083	1.3301	0.916643	4.77142
01-02-01-01-02-01-11.mp4	AV	Song	Neutral	Normal	Dogs	R1	A11	1	0.684538	3	2.6	1.50555	3	3.1	1.37032	10	1.92331	1.44467	1.60963	0.575489	1.72671	1.28895	4.07073
01-02-01-01-02-01-12.mp4	AV	Song	Neutral	Normal	Dogs	R1	A12	0.5	0.342269	2.5	2.8	1.13529	3	3	1.24722	5	2.62862	2.71838	2.14328	1.69027	0.702995	0.414641	4.37102
01-02-01-01-02-01-13.mp4	AV	Song	Neutral	Normal	Dogs	R1	A13	0.7	0.479176	3	3.2	1.54919	4	3.4	1.77639	7	2.64718	1.85944	2.39218	1.26017	1.26567	0.85475	4.33767
01-02-01-01-02-01-14.mp4	AV	Song	Neutral	Normal	Dogs	R1	A14	0.9	0.616084	3	3	0.942809	3	3.1	1.1005	9	3.08007	2.22726	2.19155	1.48691	1.40983	1.3425	4.43777
01-02-01-01-02-01-15.mp4	AV	Song	Neutral	Normal	Dogs	R1	A15	0.9	0.616084	3	3	1.49071	4	4.1	0.994429	9	1.80541	1.22369	1.32526	1.03469	1.36143	0.827	4.37104
01-02-01-01-02-01-16.mp4	AV	Song	Neutral	Normal	Dogs	R1	A16	1	0.684538	3.5	3.3	1.41814	3.5	3.6	1.26491	10	1.30548	0.797845	1.48108	0.96703	0.63496	0.640833	4.67133
01-02-01-01-02-01-17.mp4	AV	Song	Neutral	Normal	Dogs	R1	A17	0.5	0.342269	2.5	2.8	1.47573	3	3.1	1.37032	5	1.59106	0.531874	2.34192	1.80877	1.42032	1.14265	5.03838
01-02-01-01-02-01-19.mp4	AV	Song	Neutral	Normal	Dogs	R1	A19	0.9	0.616084	2.5	2.8	1.61933	3	3.1	1.52388	9	2.41013	2.60451	1.70932	1.7302	1.17963	1.13617	4.30429
01-02-01-01-02-01-20.mp4	AV	Song	Neutral	Normal	Dogs	R1	A20	1	0.684538	3	2.7	1.25167	3	2.9	1.19722	10	1.14727	0.486481	1.7403	0.969842	0.9926	0.610643	4.70471
01-02-01-01-02-01-21.mp4	AV	Song	Neutral	Normal	Dogs	R1	A21	0.9	0.616084	3	3.3	1.1595	3	3	1.41421	9	1.64909	1.47967	1.11836	0.436555	1.01254	0.847442	4.37102
01-02-01-01-02-01-22.mp4	AV	Song	Neutral	Normal	Dogs	R1	A22	0.8	0.54763	3	2.5	0.971825	3.5	3.1	1.19722	8	2.07815	1.57266	1.69358	1.27313	1.28108	1.09901	4.87154
01-02-01-01-02-01-23.mp4	AV	Song	Neutral	Normal	Dogs	R1	A23	1	0.684538	3	2.9	1.28668	3	3	1.24722	10	1.05026	0.533548	1.16078	0.530678	0.44284	0.317773	4.5045
01-02-01-01-02-01-24.mp4	AV	Song	Neutral	Normal	Dogs	R1	A24	0.5	0.342269	3	2.8	1.31656	3	3.2	1.22927	5	2.75407	1.74672	1.90871	0.937636	1.68703	0.723552	4.57123
01-02-01-01-02-02-01.mp4	AV	Song	Neutral	Normal	Dogs	R2	A1	0.9	0.616084	3.5	3	1.49071	3	2.8	1.31656	9	2.01069	1.51492	2.29875	1.64266	1.48074	0.90503	4.13748
01-02-01-01-02-02-02.mp4	AV	Song	Neutral	Normal	Dogs	R2	A2	0.9	0.616084	3	3.3	0.948683	3	3.3	0.948683	9	1.86335	1.45112	2.05424	2.11204	1.0003	0.766562	5.03838
01-02-01-01-02-02-03.mp4	AV	Song	Neutral	Normal	Dogs	R2	A3	0.7	0.479176	3	2.8	1.31656	3.5	3.2	1.61933	7	1.54948	1.03181	1.87823	1.64761	1.33409	0.877495	4.47115
01-02-01-01-02-02-04.mp4	AV	Song	Neutral	Normal	Dogs	R2	A4	0.7	0.479176	3	3	1.41421	3.5	3.2	1.47573	7	1.96443	1.64942	1.84928	1.63975	0.847693	0.691787	4.30431
01-02-01-01-02-02-05.mp4	AV	Song	Neutral	Normal	Dogs	R2	A5	1	0.684538	3	3.5	0.707107	3	3.4	0.843274	10	1.79443	0.536315	1.86064	1.51174	1.28952	0.968605	4.57123
01-02-01-01-02-02-06.mp4	AV	Song	Neutral	Normal	Dogs	R2	A6	0.8	0.54763	2.5	2.7	1.05935	3	3.1	1.44914	8	2.50614	1.79888	1.89374	1.04669	1.25802	1.22489	4.53787
01-02-01-01-02-02-07.mp4	AV	Song	Neutral	Normal	Dogs	R2	A7	0.9	0.616084	4	3.6	0.843274	3	3.1	1.28668	9	1.8689	1.38579	1.95801	1.1755	0.790008	0.929248	4.4044
01-02-01-01-02-02-08.mp4	AV	Song	Neutral	Normal	Dogs	R2	A8	0.9	0.616084	3	3.3	1.05935	4	3.7	1.1595	9	1.77822	1.62124	1.41089	0.796462	0.564702	0.247494	4.70471
01-02-01-01-02-02-09.mp4	AV	Song	Neutral	Normal	Dogs	R2	A9	0.7	0.479176	3	2.9	0.994429	3	2.9	1.19722	7	2.01656	1.31892	2.38581	2.0551	1.00785	0.858844	4.17083
01-02-01-01-02-02-10.mp4	AV	Song	Neutral	Normal	Dogs	R2	A10	0.7	0.479176	3	2.8	1.0328	3	3.3	0.674949	7	1.37691	1.03594	1.88177	1.63112	1.19575	1.21726	4.87152
01-02-01-01-02-02-11.mp4	AV	Song	Neutral	Normal	Dogs	R2	A11	1	0.684538	3	3.3	1.56702	3	3.2	1.68655	10	1.38139	1.10074	1.14155	0.70538	0.714497	0.510481	4.10408
01-02-01-01-02-02-12.mp4	AV	Song	Neutral	Normal	Dogs	R2	A12	0.7	0.479176	2.5	2.7	1.56702	3.5	3.5	1.17851	7	1.69696	1.70346	1.50399	1.16673	0.901307	0.706572	4.43777
01-02-01-01-02-02-13.mp4	AV	Song	Neutral	Normal	Dogs	R2	A13	1	0.684538	3.5	3.5	1.08012	4	3.9	0.875595	10	1.29976	1.33976	1.49633	1.24608	1.02997	0.914149	4.27094
01-02-01-01-02-02-14.mp4	AV	Song	Neutral	Normal	Dogs	R2	A14	0.9	0.616084	3	3.4	1.26491	3	3.1	0.994429	9	1.61186	1.04003	2.32381	1.404	1.3018	1.216	4.4044
01-02-01-01-02-02-15.mp4	AV	Song	Neutral	Normal	Dogs	R2	A15	0.9	0.616084	3	3.1	1.19722	3	2.7	1.25167	9	1.19593	0.803055	1.36904	0.541003	0.942459	0.96545	4.30431
01-02-01-01-02-02-16.mp4	AV	Song	Neutral	Normal	Dogs	R2	A16	0.6	0.410723	3	2.9	1.19722	3	3.1	0.994429	6	2.40197	1.96519	1.45124	1.07711	0.628075	0.473858	4.57123
01-02-01-01-02-02-17.mp4	AV	Song	Neutral	Normal	Dogs	R2	A17	0.6	0.410723	3	3.2	1.22927	4	3.6	1.07497	6	2.59782	1.93263	2.05113	1.71596	0.885079	0.755596	4.87152
01-02-01-01-02-02-19.mp4	AV	Song	Neutral	Normal	Dogs	R2	A19	0.6	0.410723	3.5	3.2	1.47573	4	3.6	1.26491	6	1.95388	1.48635	1.7912	1.71264	1.31795	1.01742	4.47115
01-02-01-01-02-02-20.mp4	AV	Song	Neutral	Normal	Dogs	R2	A20	1	0.684538	3	2.8	1.31656	3	3.1	1.28668	10	1.36543	0.893949	1.93049	1.31567	0.890526	0.628722	4.70471
01-02-01-01-02-02-21.mp4	AV	Song	Neutral	Normal	Dogs	R2	A21	0.8	0.54763	3	3.1	1.59513	3	3.4	1.07497	8	2.50167	2.33908	2.19098	1.37053	1.19974	1.01356	4.4044
01-02-01-01-02-02-22.mp4	AV	Song	Neutral	Normal	Dogs	R2	A22	0.7	0.479176	3	2.7	1.25167	3	2.8	1.13529	7	2.36579	1.6032	1.46656	0.781927	1.5753	1.43968	4.77144
01-02-01-01-02-02-23.mp4	AV	Song	Neutral	Normal	Dogs	R2	A23	0.9	0.616084	3	3	1.33333	3	2.8	1.47573	9	2.02233	2.35778	1.66689	0.761678	1.27125	1.25422	4.5045
01-02-01-01-02-02-24.mp4	AV	Song	Neutral	Normal	Dogs	R2	A24	0.9	0.616084	3.5	3.3	0.823273	3	3.1	0.737865	9	2.76778	2.09045	1.80646	1.0327	0.768115	0.340388	4.57123
01-02-02-01-01-01-01.mp4	AV	Song	Calm	Normal	Kids	R1	A1	0.7	0.479176	3	3.5	0.707107	3	3.6	1.07497	4.97	2.535	1.85094	1.62898	0.925725	0.879912	1.08628	4.37104
01-02-02-01-01-01-02.mp4	AV	Song	Calm	Normal	Kids	R1	A2	1	0.684538	4	3.8	0.918937	4	4.3	0.674949	8.1	1.23134	0.841751	1.30558	0.966678	0.797711	0.638772	5.70569
01-02-02-01-01-01-03.mp4	AV	Song	Calm	Normal	Kids	R1	A3	0.1	0.0684538	3	2.7	1.33749	2	2.3	1.33749	0.5	3.555	1.92434	2.00987	1.30072	1.06138	0.644219	4.67133
01-02-02-01-01-01-04.mp4	AV	Song	Calm	Normal	Kids	R1	A4	0.8	0.54763	3	3.5	0.707107	3	3	0.816497	5.2	1.53234	1.38235	1.52459	1.50404	0.914113	0.895392	4.5045
01-02-02-01-01-01-05.mp4	AV	Song	Calm	Normal	Kids	R1	A5	0.5	0.342269	3.5	3.6	1.17379	4	3.7	1.1595	3.65	2.28675	1.47777	2.58162	1.99554	1.24241	0.687274	5.4054
01-02-02-01-01-01-06.mp4	AV	Song	Calm	Normal	Kids	R1	A6	0.7	0.479176	3	3.2	0.788811	3	2.8	0.632456	4.2	1.97063	1.38813	1.00795	0.571525	0.920613	0.66654	5.17183
01-02-02-01-01-01-07.mp4	AV	Song	Calm	Normal	Kids	R1	A7	0.9	0.616084	3	3.1	1.1005	4	4.1	0.737865	6.48	1.50782	0.811206	2.05136	1.97701	1.44519	1.50448	4.63798
01-02-02-01-01-01-08.mp4	AV	Song	Calm	Normal	Kids	R1	A8	0.1	0.0684538	4	4	0.816497	4	3.9	0.875595	0.79	2.21475	1.38629	1.82001	0.782427	0.907745	0.439402	4.70471
01-02-02-01-01-01-09.mp4	AV	Song	Calm	Normal	Kids	R1	A9	0.4	0.273815	3	2.7	0.674949	3	2.9	1.19722	2.24	1.85182	0.744767	1.83275	1.09757	1.58614	1.14641	5.33867
01-02-02-01-01-01-10.mp4	AV	Song	Calm	Normal	Kids	R1	A10	0.2	0.136908	4.5	4	1.24722	5	4.6	0.516398	1.72	1.92489	1.14033	1.00538	0.964301	0.689523	0.923112	4.93825
01-02-02-01-01-01-11.mp4	AV	Song	Calm	Normal	Kids	R1	A11	0.8	0.54763	3	2.9	1.19722	3.5	3.4	1.07497	5.04	1.49507	0.904478	1.73959	1.23861	1.17329	0.998064	4.53787
01-02-02-01-01-01-12.mp4	AV	Song	Calm	Normal	Kids	R1	A12	0.6	0.410723	3.5	3.7	1.05935	3	3.3	0.948683	4.2	1.838	1.13851	1.37202	1.19378	1.10796	1.01922	4.83817
01-02-02-01-01-01-13.mp4	AV	Song	Calm	Normal	Kids	R1	A13	0.7	0.479176	3.5	3.5	1.08012	3	3	0.942809	4.55	2.67494	1.40631	1.35673	0.943105	1.49971	0.937078	4.33767
01-02-02-01-01-01-14.mp4	AV	Song	Calm	Normal	Kids	R1	A14	0.4	0.273815	3.5	3.5	0.849837	3.5	3.5	0.849837	2.8	1.6406	0.62326	2.20772	1.91828	1.28242	1.39796	4.67133
01-02-02-01-01-01-15.mp4	AV	Song	Calm	Normal	Kids	R1	A15	0.9	0.616084	4	4.2	0.632456	5	4.4	0.843274	7.74	2.54248	1.78851	2.17978	0.832003	1.64333	1.38309	4.5045
01-02-02-01-01-01-16.mp4	AV	Song	Calm	Normal	Kids	R1	A16	0.7	0.479176	3	3.1	0.994429	3.5	3.5	0.527046	4.62	3.33296	2.47876	1.72457	1.70807	1.1202	1.08344	5.17183
01-02-02-01-01-01-17.mp4	AV	Song	Calm	Normal	Kids	R1	A17	0.6	0.410723	3	3.1	1.1005	3	3.1	0.567646	3.72	1.92493	1.5558	1.40901	0.952111	0.934841	0.806687	5.13846
01-02-02-01-01-01-19.mp4	AV	Song	Calm	Normal	Kids	R1	A19	0.8	0.54763	3	2.9	0.737865	3	3.1	0.567646	4.8	2.99251	2.03252	1.93715	1.11731	1.52042	0.845693	4.5045
01-02-02-01-01-01-20.mp4	AV	Song	Calm	Normal	Kids	R1	A20	0.6	0.410723	4.5	4.1	1.1005	4	4	1.1547	4.86	1.66177	0.702633	0.853485	0.60783	0.652599	0.831398	4.93825
01-02-02-01-01-01-21.mp4	AV	Song	Calm	Normal	Kids	R1	A21	0.8	0.54763	3	3	1.1547	4	3.4	1.3499	5.12	1.82148	1.41955	2.16197	2.00655	1.03207	0.997777	4.63796
01-02-02-01-01-01-22.mp4	AV	Song	Calm	Normal	Kids	R1	A22	0.5	0.342269	3.5	3.5	1.08012	3.5	3.7	1.05935	3.6	2.20982	1.73465	1.71319	0.74915	1.26244	0.920497	4.9049
01-02-02-01-01-01-23.mp4	AV	Song	Calm	Normal	Kids	R1	A23	0.7	0.479176	4	3.7	0.948683	3.5	3.5	1.17851	5.04	2.29636	1.58232	2.6075	1.73918	0.863405	0.874396	4.70471
01-02-02-01-01-01-24.mp4	AV	Song	Calm	Normal	Kids	R1	A24	0.2	0.136908	3	3.2	1.0328	3	2.8	1.0328	1.2	2.16872	0.743449	2.18339	1.64089	1.49711	1.13102	5.53887
01-02-02-01-01-02-01.mp4	AV	Song	Calm	Normal	Kids	R2	A1	0.9	0.616084	3	2.9	0.994429	3	2.8	1.31656	5.13	2.49176	1.38957	2.47633	1.4425	1.00426	1.03197	4.40442
01-02-02-01-01-02-02.mp4	AV	Song	Calm	Normal	Kids	R2	A2	0.9	0.616084	3.5	3.7	1.33749	5	4.3	0.948683	7.2	1.55453	0.684757	2.13105	1.42983	0.953619	0.748322	5.60558
01-02-02-01-01-02-03.mp4	AV	Song	Calm	Normal	Kids	R2	A3	0.5	0.342269	3	3	0.666667	3.5	3.3	1.05935	3.15	1.8034	0.805282	1.80283	1.25271	1.09681	0.968434	4.77142
01-02-02-01-01-02-04.mp4	AV	Song	Calm	Normal	Kids	R2	A4	0.6	0.410723	3.5	3.3	0.948683	4	3.7	0.948683	4.2	1.86128	1.06501	1.56691	1.52671	0.883123	0.665188	4.6046
01-02-02-01-01-02-05.mp4	AV	Song	Calm	Normal	Kids	R2	A5	0.2	0.136908	3	3.5	0.971825	3.5	3.6	0.966092	1.42	1.85981	1.10207	1.69987	1.20702	0.934256	1.22682	5.83917
01-02-02-01-01-02-06.mp4	AV	Song	Calm	Normal	Kids	R2	A6	0.7	0.479176	3.5	3.7	0.823273	3.5	3.4	0.966092	4.97	1.58731	0.962438	1.12506	0.776265	0.906153	0.706652	5.4054
01-02-02-01-01-02-07.mp4	AV	Song	Calm	Normal	Kids	R2	A7	0.7	0.479176	2.5	2.9	1.28668	2.5	2.8	1.47573	3.99	3.75833	2.30265	1.57886	0.924799	1.32234	0.787076	4.97163
01-02-02-01-01-02-08.mp4	AV	Song	Calm	Normal	Kids	R2	A8	0.3	0.205361	3	3.2	1.0328	4	3.8	1.13529	2.1	1.31455	0.973148	1.71254	1.05916	0.657202	0.605816	4.80479
01-02-02-01-01-02-09.mp4	AV	Song	Calm	Normal	Kids	R2	A9	0.7	0.479176	4	3.6	1.17379	4	3.7	0.674949	5.11	1.81538	1.15099	1.76437	1.56224	1.01778	0.624682	6.03935
01-02-02-01-01-02-10.mp4	AV	Song	Calm	Normal	Kids	R2	A10	0.5	0.342269	3.5	3.3	0.823273	3	3.4	0.843274	3.35	1.88673	1.24213	2.10081	1.85742	1.07352	0.815684	4.97165
01-02-02-01-01-02-11.mp4	AV	Song	Calm	Normal	Kids	R2	A11	0.8	0.54763	3	3	1.33333	3	3.2	1.31656	4.96	3.31509	2.33692	1.80305	0.89873	1.15059	0.587829	4.27092
01-02-02-01-01-02-12.mp4	AV	Song	Calm	Normal	Kids	R2	A12	0.7	0.479176	4	3.7	1.1595	3	3.2	0.918937	4.83	3.23253	2.49693	1.58151	0.735794	1.04786	1.19436	4.83817
01-02-02-01-01-02-13.mp4	AV	Song	Calm	Normal	Kids	R2	A13	1	0.684538	3.5	3.4	1.07497	4	3.2	1.31656	6.6	1.66047	0.892267	1.38539	0.97764	0.992418	0.542286	5.03835
01-02-02-01-01-02-14.mp4	AV	Song	Calm	Normal	Kids	R2	A14	0.7	0.479176	3	3.1	0.875595	3	3.1	0.994429	4.34	2.12923	1.6373	1.64169	1.0924	0.666563	0.464548	4.57123
01-02-02-01-01-02-15.mp4	AV	Song	Calm	Normal	Kids	R2	A15	0.9	0.616084	3	3.1	1.19722	4	3.8	0.788811	6.21	1.5834	1.03878	1.58427	1.64471	0.934874	1.27973	4.63796
01-02-02-01-01-02-16.mp4	AV	Song	Calm	Normal	Kids	R2	A16	0.7	0.479176	3	3.5	0.971825	4	3.5	0.971825	4.9	2.4084	1.33168	2.03726	1.74491	1.04833	1.08332	4.73806
01-02-02-01-01-02-17.mp4	AV	Song	Calm	Normal	Kids	R2	A17	1	0.684538	2	2	1.05409	1.5	2	1.24722	4	1.92298	2.05623	1.41678	0.886322	1.10568	1.018	5.17183
01-02-02-01-01-02-19.mp4	AV	Song	Calm	Normal	Kids	R2	A19	0.6	0.410723	4	3.5	0.971825	3	3.1	1.19722	3.96	1.92521	1.59113	1.16082	0.869393	0.612388	0.471677	4.33767
01-02-02-01-01-02-20.mp4	AV	Song	Calm	Normal	Kids	R2	A20	0.6	0.410723	4	3.5	0.971825	4	3.9	0.994429	4.44	3.30647	2.02577	2.37712	1.77534	1.21194	0.686963	5.23856
01-02-02-01-01-02-21.mp4	AV	Song	Calm	Normal	Kids	R2	A21	0.5	0.342269	3	3.1	1.37032	3	3.1	1.1005	3.1	1.95061	1.21174	1.21942	0.690622	0.969368	0.627544	4.57123
01-02-02-01-01-02-22.mp4	AV	Song	Calm	Normal	Kids	R2	A22	0.3	0.205361	4	3.7	0.674949	3	3.2	0.788811	2.07	2.6958	0.957282	2.16281	1.65929	1.11777	0.9034	5.23856
01-02-02-01-01-02-23.mp4	AV	Song	Calm	Normal	Kids	R2	A23	0.7	0.479176	4	3.7	1.33749	4	3.6	1.26491	5.11	2.33574	1.83357	0.669291	0.331457	0.717657	0.44651	4.53787
01-02-02-01-01-02-24.mp4	AV	Song	Calm	Normal	Kids	R2	A24	0.5	0.342269	3.5	3	1.24722	3	2.8	1.39841	2.9	2.52917	2.25993	1.63493	1.14824	0.877953	0.51978	5.77242
01-02-02-01-02-01-01.mp4	AV	Song	Calm	Normal	Dogs	R1	A1	0.6	0.410723	2	2.8	1.75119	4	3.4	1.83787	3.72	2.29971	1.5302	1.30719	0.76822	0.658992	0.699915	4.5045
01-02-02-01-02-01-02.mp4	AV	Song	Calm	Normal	Dogs	R1	A2	0.5	0.342269	4	3.6	0.843274	4	3.5	0.707107	3.55	3.46926	2.25045	1.20431	0.801947	0.909515	0.790577	5.53885
01-02-02-01-02-01-03.mp4	AV	Song	Calm	Normal	Dogs	R1	A3	0.2	0.136908	3.5	3.5	1.08012	3	3.4	0.843274	1.38	3.47689	2.10661	1.14648	0.688856	0.802838	0.499941	4.23756
01-02-02-01-02-01-04.mp4	AV	Song	Calm	Normal	Dogs	R1	A4	0.8	0.54763	3.5	3.5	1.2693	4	3.8	1.0328	5.84	2.64847	1.57702	1.68059	1.1977	1.08818	0.705138	4.5045
01-02-02-01-02-01-05.mp4	AV	Song	Calm	Normal	Dogs	R1	A5	0.5	0.342269	4	3.6	1.07497	4	3.8	1.22927	3.7	1.52406	0.316923	1.75524	1.25513	1.37786	0.892557	5.07173
01-02-02-01-02-01-06.mp4	AV	Song	Calm	Normal	Dogs	R1	A6	0.7	0.479176	4	3.9	0.875595	4	4.1	0.994429	5.6	1.74066	1.65012	2.11637	0.864372	1.61974	1.03143	5.37204
01-02-02-01-02-01-07.mp4	AV	Song	Calm	Normal	Dogs	R1	A7	0.8	0.54763	2	2.3	1.1595	3.5	3.1	1.52388	4.32	2.31557	1.483	2.57853	1.97054	1.8069	1.08536	4.73806
01-02-02-01-02-01-08.mp4	AV	Song	Calm	Normal	Dogs	R1	A8	0	0	3.5	3.5	1.08012	4	3.7	1.41814	0	1.63632	1.26127	1.62571	1.39302	1.15303	0.935906	4.80479
01-02-02-01-02-01-09.mp4	AV	Song	Calm	Normal	Dogs	R1	A9	0.6	0.410723	2.5	2.6	0.699206	3	3.1	0.994429	3.42	1.54584	0.609433	1.17487	1.55137	0.931861	0.864655	4.63798
01-02-02-01-02-01-10.mp4	AV	Song	Calm	Normal	Dogs	R1	A10	0.2	0.136908	3.5	3.4	0.699206	3	3.3	0.823273	1.34	2.11687	1.63482	1.634	1.23137	0.693587	0.681433	5.07173
01-02-02-01-02-01-11.mp4	AV	Song	Calm	Normal	Dogs	R1	A11	0.4	0.273815	4	3.6	1.26491	4	4.3	0.483046	3.16	1.16473	0.584175	1.11934	0.818901	0.971508	1.01575	4.5045
01-02-02-01-02-01-12.mp4	AV	Song	Calm	Normal	Dogs	R1	A12	0.5	0.342269	3.5	3.5	1.35401	3.5	3.7	1.33749	3.6	2.37026	1.95748	1.86382	1.14101	1.07685	1.08622	4.57123
01-02-02-01-02-01-13.mp4	AV	Song	Calm	Normal	Dogs	R1	A13	0.8	0.54763	3	3.2	0.632456	3	3.2	1.13529	5.12	1.42333	0.621051	1.60461	0.950255	1.02325	0.688685	4.83817
01-02-02-01-02-01-14.mp4	AV	Song	Calm	Normal	Dogs	R1	A14	0.7	0.479176	3.5	3.5	1.35401	4	3.6	1.07497	4.97	1.65114	0.874294	1.52677	0.743753	1.27231	0.784597	4.40442
01-02-02-01-02-01-15.mp4	AV	Song	Calm	Normal	Dogs	R1	A15	0.8	0.54763	3	2.9	1.1005	3	3.3	1.25167	4.96	1.72423	1.50271	1.51447	1.11623	1.11018	0.930522	4.43777
01-02-02-01-02-01-16.mp4	AV	Song	Calm	Normal	Dogs	R1	A16	0.3	0.205361	4	3.4	1.3499	4	4	0.816497	2.22	1.538	0.485112	1.53167	0.852212	0.866934	0.367561	5.07173
01-02-02-01-02-01-17.mp4	AV	Song	Calm	Normal	Dogs	R1	A17	0.9	0.616084	3	3.3	0.674949	3.5	3.6	0.966092	6.21	1.53562	0.74135	2.21752	1.46073	1.12005	0.997616	5.17183
01-02-02-01-02-01-19.mp4	AV	Song	Calm	Normal	Dogs	R1	A19	0.7	0.479176	3	2.6	1.07497	3	2.7	1.1595	3.71	2.31969	1.84279	1.71513	1.19957	0.413079	0.222733	4.57123
01-02-02-01-02-01-20.mp4	AV	Song	Calm	Normal	Dogs	R1	A20	0.4	0.273815	3	3.2	0.918937	3	3.1	0.994429	2.52	1.88058	0.962186	2.15201	1.50548	1.89072	1.41981	4.97163
01-02-02-01-02-01-21.mp4	AV	Song	Calm	Normal	Dogs	R1	A21	0.9	0.616084	3.5	3.6	0.966092	3.5	3.3	1.41814	6.21	2.53973	2.28132	1.73904	1.15379	0.774573	0.701878	4.83817
01-02-02-01-02-01-22.mp4	AV	Song	Calm	Normal	Dogs	R1	A22	0.8	0.54763	3	3.5	0.707107	3	3.4	0.843274	5.52	2.37165	1.83563	1.40822	0.773475	1.02053	0.991917	5.17183
01-02-02-01-02-01-23.mp4	AV	Song	Calm	Normal	Dogs	R1	A23	0.8	0.54763	3.5	3	1.41421	3	3	1.41421	4.8	1.55334	0.752324	1.45294	0.741564	1.30612	0.952576	4.57125
01-02-02-01-02-01-24.mp4	AV	Song	Calm	Normal	Dogs	R1	A24	0.7	0.479176	3	3	0.471405	3	2.7	1.05935	3.99	2.22751	0.646823	2.04744	1.63594	0.504823	0.361316	5.1051
01-02-02-01-02-02-01.mp4	AV	Song	Calm	Normal	Dogs	R2	A1	0.9	0.616084	4	3.7	1.33749	4	3.9	1.1005	6.84	1.59349	0.959528	1.4185	1.17298	1.36551	1.4482	4.43777
01-02-02-01-02-02-02.mp4	AV	Song	Calm	Normal	Dogs	R2	A2	0.6	0.410723	3	3.1	0.567646	3	3	0.942809	3.66	2.07634	1.79273	2.54021	1.62011	1.44653	1.29958	5.6056
01-02-02-01-02-02-03.mp4	AV	Song	Calm	Normal	Dogs	R2	A3	0.6	0.410723	3	3.1	1.1005	3	2.9	1.19722	3.6	3.95275	2.08167	1.85957	1.63948	1.16891	0.976177	4.6046
01-02-02-01-02-02-04.mp4	AV	Song	Calm	Normal	Dogs	R2	A4	0.7	0.479176	3.5	3.3	0.948683	4	3.7	1.25167	4.9	2.11213	1.21829	1.29982	0.719454	0.83166	0.686271	4.57123
01-02-02-01-02-02-05.mp4	AV	Song	Calm	Normal	Dogs	R2	A5	0.3	0.205361	4	3.6	1.07497	4	3.6	1.42984	2.16	2.0525	1.18021	1.99514	1.05015	0.454462	0.327638	5.13846
01-02-02-01-02-02-06.mp4	AV	Song	Calm	Normal	Dogs	R2	A6	0.8	0.54763	3	2.7	1.05935	3	2.9	1.1005	4.48	2.37651	1.59249	1.40107	0.788372	0.943946	0.887686	5.33867
01-02-02-01-02-02-07.mp4	AV	Song	Calm	Normal	Dogs	R2	A7	0.8	0.54763	3	2.5	1.43372	2.5	2.3	1.25167	3.84	1.6675	0.864869	2.59856	1.86316	0.93883	0.544391	4.70471
01-02-02-01-02-02-08.mp4	AV	Song	Calm	Normal	Dogs	R2	A8	0.1	0.0684538	3.5	3.5	0.849837	4	3.9	0.737865	0.74	1.96433	1.40137	1.36528	1.48179	0.814055	0.883276	4.87154
01-02-02-01-02-02-09.mp4	AV	Song	Calm	Normal	Dogs	R2	A9	0.6	0.410723	3	3.4	0.966092	3.5	3.6	0.966092	4.2	2.48475	2.12661	1.3153	0.883878	0.996403	1.0116	4.9049
01-02-02-01-02-02-10.mp4	AV	Song	Calm	Normal	Dogs	R2	A10	0	0	3	2.9	0.994429	3.5	3.3	1.1595	0	2.57269	1.89909	0.917487	0.561067	0.980136	0.728663	5.005
01-02-02-01-02-02-11.mp4	AV	Song	Calm	Normal	Dogs	R2	A11	1	0.684538	4	3.7	0.948683	4	3.9	0.994429	7.6	0.809087	0.440236	0.825429	0.911817	0.524279	0.535904	4.47115
01-02-02-01-02-02-12.mp4	AV	Song	Calm	Normal	Dogs	R2	A12	0.6	0.410723	3.5	3.2	1.0328	3.5	3.5	0.849837	4.02	2.24294	1.27333	1.80421	0.845805	1.30866	0.698913	4.87154
01-02-02-01-02-02-13.mp4	AV	Song	Calm	Normal	Dogs	R2	A13	0.9	0.616084	3	2.9	1.44914	3	3.3	0.948683	5.58	2.58341	1.84132	1.84597	1.04974	1.44161	0.856275	5.20521
01-02-02-01-02-02-14.mp4	AV	Song	Calm	Normal	Dogs	R2	A14	0.4	0.273815	3	3	0.471405	3	3.1	0.737865	2.44	1.57107	1.42039	1.35823	0.937815	1.15014	1.03284	4.5045
01-02-02-01-02-02-15.mp4	AV	Song	Calm	Normal	Dogs	R2	A15	1	0.684538	3.5	3.7	1.05935	3	3.3	1.41814	7	2.24943	1.53425	1.96153	1.65469	1.00836	0.837886	4.5045
01-02-02-01-02-02-16.mp4	AV	Song	Calm	Normal	Dogs	R2	A16	0.4	0.273815	3	3.3	0.948683	4	4.1	0.567646	2.96	1.59185	0.819987	1.58115	1.30192	0.696787	0.499338	5.005
01-02-02-01-02-02-17.mp4	AV	Song	Calm	Normal	Dogs	R2	A17	0.6	0.410723	3	3	0.816497	3	3.2	0.918937	3.72	2.71427	1.59325	1.62144	0.957655	1.21625	0.823736	5.27194
01-02-02-01-02-02-19.mp4	AV	Song	Calm	Normal	Dogs	R2	A19	0.8	0.54763	3	3	1.24722	4	3.7	1.1595	5.36	2.41534	1.21942	2.38745	0.852358	1.83322	1.08716	4.17083
01-02-02-01-02-02-20.mp4	AV	Song	Calm	Normal	Dogs	R2	A20	0.3	0.205361	4	3.6	1.07497	4	3.8	0.918937	2.22	2.03807	1.46561	1.32284	1.0417	1.05621	0.981115	5.1051
01-02-02-01-02-02-21.mp4	AV	Song	Calm	Normal	Dogs	R2	A21	1	0.684538	3	2.9	1.44914	3	2.8	1.22927	5.7	1.72726	1.14668	2.44357	1.00794	0.975454	0.719837	4.70471
01-02-02-01-02-02-22.mp4	AV	Song	Calm	Normal	Dogs	R2	A22	0.6	0.410723	3	2.7	0.948683	3	3.2	0.918937	3.54	2.9787	1.91403	1.09811	0.716034	1.00726	0.651805	5.13848
01-02-02-01-02-02-23.mp4	AV	Song	Calm	Normal	Dogs	R2	A23	1	0.684538	4	3.9	0.737865	4	4.1	0.737865	8	2.25179	1.53049	2.44989	1.9083	0.859743	1.03045	4.5045
01-02-02-01-02-02-24.mp4	AV	Song	Calm	Normal	Dogs	R2	A24	0.2	0.136908	3	3	0.816497	3	2.9	1.37032	1.18	1.64397	1.62303	2.06424	1.49988	0.714119	0.513382	4.63796
01-02-02-02-01-01-01.mp4	AV	Song	Calm	Strong	Kids	R1	A1	0.9	0.616084	3.5	3.8	0.918937	3	3.4	0.843274	6.48	2.49555	1.10968	1.89518	1.33489	1.02738	0.873642	4.70469
01-02-02-02-01-01-02.mp4	AV	Song	Calm	Strong	Kids	R1	A2	0.8	0.54763	3.5	3.4	1.17379	4	3.5	0.707107	5.52	1.92113	1.32683	1.58759	0.588849	1.20347	1.3407	5.63896
01-02-02-02-01-01-03.mp4	AV	Song	Calm	Strong	Kids	R1	A3	0	0	3.5	3.1	1.1005	3.5	3.5	0.527046	0	2.93808	2.2428	2.00936	1.69415	1.62815	0.881386	4.87152
01-02-02-02-01-01-04.mp4	AV	Song	Calm	Strong	Kids	R1	A4	0.6	0.410723	3	3.2	1.31656	3.5	3.7	0.823273	4.14	1.55118	1.05106	1.37681	1.05516	0.991957	0.531979	5.30529
01-02-02-02-01-01-05.mp4	AV	Song	Calm	Strong	Kids	R1	A5	0.4	0.273815	3	3.6	1.07497	3	3.2	1.47573	2.72	2.08828	2.27157	1.39376	0.965801	1.04355	0.700584	6.1061
01-02-02-02-01-01-06.mp4	AV	Song	Calm	Strong	Kids	R1	A6	0.7	0.479176	3	3	0.942809	3	2.9	1.1005	4.13	1.36475	0.674126	1.55519	1.56849	1.14756	1.32087	5.60558
01-02-02-02-01-01-07.mp4	AV	Song	Calm	Strong	Kids	R1	A7	0.7	0.479176	3	3	1.1547	3	2.7	0.823273	3.99	2.16287	1.90621	1.56822	0.99733	0.914713	0.82282	4.9049
01-02-02-02-01-01-08.mp4	AV	Song	Calm	Strong	Kids	R1	A8	0.9	0.616084	3.5	3.8	1.13529	4	4	0.942809	7.02	1.72289	0.828121	1.51166	1.39691	0.648557	0.503632	5.4054
01-02-02-02-01-01-09.mp4	AV	Song	Calm	Strong	Kids	R1	A9	0.4	0.273815	3	3	1.1547	3	2.9	1.1005	2.36	1.99733	1.55133	1.69624	1.68803	1.27734	1.2063	5.43877
01-02-02-02-01-01-10.mp4	AV	Song	Calm	Strong	Kids	R1	A10	0.4	0.273815	2.5	2.8	0.918937	3	3.1	0.994429	2.36	2.49009	0.927058	2.04435	0.938431	1.13549	0.616538	5.13846
01-02-02-02-01-01-11.mp4	AV	Song	Calm	Strong	Kids	R1	A11	0.7	0.479176	4	3.5	0.971825	3.5	3.4	1.17379	4.83	1.56167	1.10745	1.64573	1.68022	0.948619	1.03812	5.1051
01-02-02-02-01-01-12.mp4	AV	Song	Calm	Strong	Kids	R1	A12	0.7	0.479176	3.5	3.5	0.849837	3	2.9	1.1005	4.48	2.52383	2.35304	1.53236	1.50774	1.17597	0.930796	4.73806
01-02-02-02-01-01-13.mp4	AV	Song	Calm	Strong	Kids	R1	A13	0.9	0.616084	3	3	1.33333	4	3.7	0.948683	6.03	2.46585	1.91921	1.90447	1.06727	0.987665	0.556976	5.27192
01-02-02-02-01-01-14.mp4	AV	Song	Calm	Strong	Kids	R1	A14	0.4	0.273815	4	3.4	1.3499	2.5	2.8	1.39841	2.48	2.30703	0.961558	1.73792	0.93145	1.3088	0.573835	5.03838
01-02-02-02-01-01-15.mp4	AV	Song	Calm	Strong	Kids	R1	A15	0.7	0.479176	4	3.6	0.843274	4	3.5	0.971825	4.97	1.94268	1.39675	2.01043	1.86983	1.1019	0.952485	4.5045
01-02-02-02-01-01-16.mp4	AV	Song	Calm	Strong	Kids	R1	A16	0.5	0.342269	3	3.3	1.25167	3	3.2	1.31656	3.25	2.17373	1.25981	1.67905	1.33217	0.816363	0.759174	5.07175
01-02-02-02-01-01-17.mp4	AV	Song	Calm	Strong	Kids	R1	A17	0.8	0.54763	3	3.1	0.737865	3	3.4	0.966092	5.2	1.09904	0.649716	1.19174	0.770817	0.746929	0.425045	5.23856
01-02-02-02-01-01-19.mp4	AV	Song	Calm	Strong	Kids	R1	A19	0.3	0.205361	3	3.4	0.843274	4	3.6	1.17379	2.1	2.86329	1.88882	1.93051	1.69583	1.09734	0.838784	4.80481
01-02-02-02-01-01-20.mp4	AV	Song	Calm	Strong	Kids	R1	A20	0.6	0.410723	3.5	3.6	1.17379	4	3.8	1.0328	4.44	1.73238	0.750889	1.00314	0.664142	1.00821	1.30558	5.63896
01-02-02-02-01-01-21.mp4	AV	Song	Calm	Strong	Kids	R1	A21	0.9	0.616084	3	3	1.33333	3.5	3.2	1.22927	5.58	1.89913	0.6785	1.3382	1.06322	0.855895	0.704639	4.97163
01-02-02-02-01-01-22.mp4	AV	Song	Calm	Strong	Kids	R1	A22	1	0.684538	3	3	1.33333	2.5	2.6	1.07497	5.6	1.07292	0.592294	1.11949	0.780857	0.714001	0.844364	5.37202
01-02-02-02-01-01-23.mp4	AV	Song	Calm	Strong	Kids	R1	A23	0.8	0.54763	4	3.6	1.17379	3	3	1.56347	5.28	1.79329	1.06267	1.67945	1.59457	0.955213	0.864889	5.33867
01-02-02-02-01-01-24.mp4	AV	Song	Calm	Strong	Kids	R1	A24	0.4	0.273815	3	3.2	1.22927	3	2.9	0.994429	2.44	2.25467	1.09036	1.89423	1.05105	1.15866	1.02533	5.37202
01-02-02-02-01-02-01.mp4	AV	Song	Calm	Strong	Kids	R2	A1	0.8	0.54763	4.5	4.4	0.699206	4	3.7	1.33749	6.48	2.04331	1.96917	2.49662	1.84187	0.748175	0.526334	4.5045
01-02-02-02-01-02-02.mp4	AV	Song	Calm	Strong	Kids	R2	A2	0.9	0.616084	4.5	4	1.24722	4	3.9	1.19722	7.11	2.58021	2.00462	1.36821	1.2334	1.01213	0.663245	6.07275
01-02-02-02-01-02-03.mp4	AV	Song	Calm	Strong	Kids	R2	A3	0.2	0.136908	3.5	3.3	1.1595	3	3	1.41421	1.26	2.54683	1.35614	2.27338	1.86091	1.70483	1.22494	4.73806
01-02-02-02-01-02-04.mp4	AV	Song	Calm	Strong	Kids	R2	A4	0.8	0.54763	3.5	3.3	1.1595	4	3.5	1.2693	5.44	2.03637	2.0869	1.47274	1.05342	1.15227	0.999726	5.20521
01-02-02-02-01-02-05.mp4	AV	Song	Calm	Strong	Kids	R2	A5	0.7	0.479176	4	3.9	0.875595	3.5	3.4	1.50555	5.11	1.55733	0.970447	1.85528	1.74903	0.557438	0.430035	6.17283
01-02-02-02-01-02-06.mp4	AV	Song	Calm	Strong	Kids	R2	A6	1	0.684538	4	3.6	1.07497	4	3.8	1.31656	7.4	1.75875	1.36822	1.66746	1.41635	0.871934	1.00103	6.33967
01-02-02-02-01-02-07.mp4	AV	Song	Calm	Strong	Kids	R2	A7	0.9	0.616084	4	3.6	1.07497	4	3.2	1.13529	6.12	2.07425	1.32696	1.98634	1.43446	1.40235	0.854802	4.93827
01-02-02-02-01-02-08.mp4	AV	Song	Calm	Strong	Kids	R2	A8	0.3	0.205361	3	3.1	1.59513	3	3.1	1.44914	1.86	2.96522	2.03506	1.47826	1.69976	1.15089	1.06442	5.33867
01-02-02-02-01-02-09.mp4	AV	Song	Calm	Strong	Kids	R2	A9	0.5	0.342269	3	3	0.816497	4	3.6	0.843274	3.3	2.98586	1.94231	1.98681	1.66643	0.984635	0.707214	5.40542
01-02-02-02-01-02-10.mp4	AV	Song	Calm	Strong	Kids	R2	A10	0.4	0.273815	3	3.2	0.918937	3	3.5	1.17851	2.68	2.00181	1.0583	3.24057	2.51105	1.08288	1.13608	5.37204
01-02-02-02-01-02-11.mp4	AV	Song	Calm	Strong	Kids	R2	A11	0.8	0.54763	3	3.2	0.632456	3.5	3.6	1.17379	5.44	1.40218	0.681991	2.47208	2.38903	1.14687	0.67153	4.93827
01-02-02-02-01-02-12.mp4	AV	Song	Calm	Strong	Kids	R2	A12	0.6	0.410723	3	3.2	0.632456	4	3.9	0.994429	4.26	2.60094	1.38088	1.9676	0.981155	1.76197	0.916172	4.67133
01-02-02-02-01-02-13.mp4	AV	Song	Calm	Strong	Kids	R2	A13	0.8	0.54763	4	3.5	0.971825	4	3.6	0.843274	5.68	1.80032	1.15982	1.6947	0.984909	1.01082	1.18759	4.87154
01-02-02-02-01-02-14.mp4	AV	Song	Calm	Strong	Kids	R2	A14	0.9	0.616084	4	3.5	1.08012	3.5	3	1.49071	5.85	2.23905	1.83342	2.13873	1.84476	0.993076	1.23616	5.40542
01-02-02-02-01-02-15.mp4	AV	Song	Calm	Strong	Kids	R2	A15	0.9	0.616084	3.5	3.3	1.1595	4	4	0.666667	6.57	1.46336	0.668023	1.4417	0.941235	0.787416	0.657974	4.6046
01-02-02-02-01-02-16.mp4	AV	Song	Calm	Strong	Kids	R2	A16	0.4	0.273815	4	3.4	0.843274	4	3.6	0.966092	2.8	2.15169	1.35993	1.8413	0.973742	1.33394	0.841684	5.27194
01-02-02-02-01-02-17.mp4	AV	Song	Calm	Strong	Kids	R2	A17	0.9	0.616084	3	3	0.816497	3	3.3	1.05935	5.67	2.06425	1.54733	2.53345	1.70531	1.20389	0.650615	5.23856
01-02-02-02-01-02-19.mp4	AV	Song	Calm	Strong	Kids	R2	A19	0.2	0.136908	4	4	0.666667	4	4.2	0.632456	1.64	1.07547	0.462847	1.25942	0.707919	0.85573	0.50883	5.005
01-02-02-02-01-02-20.mp4	AV	Song	Calm	Strong	Kids	R2	A20	0.3	0.205361	4	3.4	1.3499	4	3.4	1.17379	2.04	1.92698	1.09909	1.9918	1.01654	1.25297	0.992031	5.37202
01-02-02-02-01-02-21.mp4	AV	Song	Calm	Strong	Kids	R2	A21	1	0.684538	3	3.2	1.22927	3	2.8	1.31656	6	1.75085	0.925891	1.8684	0.897519	2.12664	1.63746	4.9049
01-02-02-02-01-02-22.mp4	AV	Song	Calm	Strong	Kids	R2	A22	0.8	0.54763	4	3.7	1.1595	4	4.1	0.994429	6.24	1.94307	1.32733	1.88803	1.74665	1.14069	0.814655	5.5055
01-02-02-02-01-02-23.mp4	AV	Song	Calm	Strong	Kids	R2	A23	1	0.684538	3	3.1	1.1005	3.5	3.3	1.1595	6.4	1.45731	0.951834	1.27847	0.867442	1.10386	1.04991	4.77144
01-02-02-02-01-02-24.mp4	AV	Song	Calm	Strong	Kids	R2	A24	0.7	0.479176	3.5	3.6	1.42984	3	3.4	1.3499	4.9	1.98745	0.934635	1.14052	1.38542	0.64091	0.550403	5.63898
01-02-02-02-02-01-01.mp4	AV	Song	Calm	Strong	Dogs	R1	A1	0.4	0.273815	3.5	3.4	0.966092	3	3.5	0.971825	2.76	1.95037	1.16761	2.52463	1.75519	0.843024	0.551409	4.73806
01-02-02-02-02-01-02.mp4	AV	Song	Calm	Strong	Dogs	R1	A2	0.7	0.479176	3	3.1	1.19722	3	3.4	1.07497	4.55	3.16823	2.10944	1.7759	1.15091	1.03612	1.27955	6.006
01-02-02-02-02-01-03.mp4	AV	Song	Calm	Strong	Dogs	R1	A3	0.1	0.0684538	4	4.1	0.567646	3	3.2	1.0328	0.73	1.91186	1.326	1.90538	1.29874	0.748148	0.469035	4.97165
01-02-02-02-02-01-04.mp4	AV	Song	Calm	Strong	Dogs	R1	A4	0.6	0.410723	4.5	4.4	0.699206	4	4.3	0.483046	5.22	1.26514	0.764123	2.32245	1.99723	0.712103	0.352609	5.9059
01-02-02-02-02-01-05.mp4	AV	Song	Calm	Strong	Dogs	R1	A5	0.8	0.54763	4	4	0.942809	3.5	3.6	1.17379	6.08	1.23207	0.405165	1.2566	1.05084	0.619132	0.326693	5.83917
01-02-02-02-02-01-06.mp4	AV	Song	Calm	Strong	Dogs	R1	A6	0.9	0.616084	3	3	0.942809	2.5	3	1.41421	5.4	1.48221	1.19481	2.5659	1.94294	1.69404	1.31966	5.40542
01-02-02-02-02-01-07.mp4	AV	Song	Calm	Strong	Dogs	R1	A7	1	0.684538	4	3.7	0.674949	3.5	3.7	0.823273	7.4	1.95761	1.77014	1.95649	1.3857	1.16442	1.1682	4.70471
01-02-02-02-02-01-08.mp4	AV	Song	Calm	Strong	Dogs	R1	A8	0.7	0.479176	3.5	3.5	1.08012	4	4	1.05409	5.25	3.20148	2.36994	1.2684	0.990605	0.828447	0.932077	5.23856
01-02-02-02-02-01-09.mp4	AV	Song	Calm	Strong	Dogs	R1	A9	0.4	0.273815	3	2.9	0.737865	3	2.9	0.875595	2.32	2.73498	1.82329	1.8383	1.70561	0.897721	0.845992	5.37204
01-02-02-02-02-01-10.mp4	AV	Song	Calm	Strong	Dogs	R1	A10	0.3	0.205361	4	3.3	1.05935	3.5	3.3	0.948683	1.98	1.90855	1.06437	1.88817	1.96938	0.772528	0.737223	4.97165
01-02-02-02-02-01-11.mp4	AV	Song	Calm	Strong	Dogs	R1	A11	1	0.684538	4	3.7	0.674949	4	3.9	0.875595	7.6	1.87149	1.36345	1.7878	1.55678	0.619968	0.39794	4.9049
01-02-02-02-02-01-12.mp4	AV	Song	Calm	Strong	Dogs	R1	A12	0.5	0.342269	3.5	3.6	0.966092	3.5	3.6	0.699206	3.6	2.31798	1.36857	1.96426	1.46895	1.77601	1.2718	4.67133
01-02-02-02-02-01-13.mp4	AV	Song	Calm	Strong	Dogs	R1	A13	1	0.684538	3	2.9	1.19722	3	3.1	0.994429	6	1.81406	1.6571	1.86082	1.45684	0.972707	0.766708	4.83817
01-02-02-02-02-01-14.mp4	AV	Song	Calm	Strong	Dogs	R1	A14	0.3	0.205361	3	3.1	0.875595	3	3.2	1.13529	1.89	1.37411	0.642312	2.45416	2.05781	0.643727	0.546091	4.80481
01-02-02-02-02-01-15.mp4	AV	Song	Calm	Strong	Dogs	R1	A15	0.7	0.479176	3	3.1	1.44914	3	3	1.56347	4.27	2.03178	1.74725	1.8099	1.45745	1.29205	1.09783	4.57123
01-02-02-02-02-01-16.mp4	AV	Song	Calm	Strong	Dogs	R1	A16	0.6	0.410723	4	3.5	1.08012	4	3.6	1.3499	4.26	1.77048	1.02481	1.52526	0.661033	1.43768	1.24547	5.20521
01-02-02-02-02-01-17.mp4	AV	Song	Calm	Strong	Dogs	R1	A17	0.9	0.616084	4	3.8	0.788811	3.5	3.6	1.26491	6.66	1.12322	0.877783	1.15009	0.688793	1.08786	1.2541	5.20519
01-02-02-02-02-01-19.mp4	AV	Song	Calm	Strong	Dogs	R1	A19	0.8	0.54763	3	3.4	0.699206	4	3.6	0.843274	5.6	2.28321	1.28564	1.52217	0.90271	1.21045	0.821282	4.93827
01-02-02-02-02-01-20.mp4	AV	Song	Calm	Strong	Dogs	R1	A20	0.8	0.54763	4	3.6	1.3499	3.5	3.9	0.994429	6	2.03291	2.25794	1.16985	0.672032	0.513581	0.329393	5.17183
01-02-02-02-02-01-21.mp4	AV	Song	Calm	Strong	Dogs	R1	A21	0.9	0.616084	3.5	3.7	0.823273	3	3.5	1.17851	6.48	2.05774	0.870176	1.89445	0.806705	0.728535	0.434452	5.005
01-02-02-02-02-01-22.mp4	AV	Song	Calm	Strong	Dogs	R1	A22	1	0.684538	3.5	3.7	0.823273	3.5	3.6	0.966092	7.3	2.10225	1.39313	1.97729	1.45282	1.34696	1.16146	6.37304
01-02-02-02-02-01-23.mp4	AV	Song	Calm	Strong	Dogs	R1	A23	1	0.684538	3	3.2	1.0328	3.5	3.3	1.49443	6.5	2.08419	0.970129	2.81956	1.96648	1.3917	1.17162	5.83917
01-02-02-02-02-01-24.mp4	AV	Song	Calm	Strong	Dogs	R1	A24	0.5	0.342269	3	2.7	1.1595	3	2.8	1.22927	2.75	1.95022	0.980759	2.04314	1.79539	1.42552	0.998068	5.4054
01-02-02-02-02-02-01.mp4	AV	Song	Calm	Strong	Dogs	R2	A1	0.8	0.54763	3.5	3.3	1.1595	3	3.3	0.674949	5.28	2.15249	1.3516	1.55158	0.667946	1.29206	1.05233	4.93827
01-02-02-02-02-02-02.mp4	AV	Song	Calm	Strong	Dogs	R2	A2	0.6	0.410723	3	3.2	0.918937	3	3.6	1.07497	4.08	2.00244	1.16331	2.09605	1.21099	0.950876	0.785551	6.1061
01-02-02-02-02-02-03.mp4	AV	Song	Calm	Strong	Dogs	R2	A3	0.1	0.0684538	3	3.3	1.05935	4	3.9	1.1005	0.72	2.33728	1.17999	2.38171	1.44008	0.974687	0.663771	5.17183
01-02-02-02-02-02-04.mp4	AV	Song	Calm	Strong	Dogs	R2	A4	0.8	0.54763	4	3.7	0.948683	3.5	3.7	1.05935	5.92	1.79097	1.12221	2.02139	1.96029	1.09285	1.00253	4.83817
01-02-02-02-02-02-05.mp4	AV	Song	Calm	Strong	Dogs	R2	A5	0.5	0.342269	3.5	3.6	0.966092	4	3.7	1.05935	3.65	2.39531	1.58087	2.15968	1.84826	1.32996	1.32427	6.006
01-02-02-02-02-02-06.mp4	AV	Song	Calm	Strong	Dogs	R2	A6	0.6	0.410723	3.5	3.2	0.918937	4	3.6	0.843274	4.08	1.86033	1.11719	1.43514	0.843134	0.843566	0.689205	5.57223
01-02-02-02-02-02-07.mp4	AV	Song	Calm	Strong	Dogs	R2	A7	0.9	0.616084	3.5	3.2	1.61933	2.5	2.8	1.47573	5.4	2.13353	1.42866	1.88888	1.25619	0.976375	0.708824	5.1051
01-02-02-02-02-02-08.mp4	AV	Song	Calm	Strong	Dogs	R2	A8	0.6	0.410723	4	3.7	0.948683	3.5	3.4	1.17379	4.26	1.97442	0.895521	2.26151	1.80329	0.981662	0.737114	5.1051
01-02-02-02-02-02-09.mp4	AV	Song	Calm	Strong	Dogs	R2	A9	0.4	0.273815	3	3.4	1.07497	3	3.3	1.05935	2.68	1.96655	1.24856	1.40517	1.3252	1.21157	1.07953	5.97265
01-02-02-02-02-02-10.mp4	AV	Song	Calm	Strong	Dogs	R2	A10	0.2	0.136908	3	3.3	0.823273	3.5	3.6	0.966092	1.38	2.81236	2.52951	2.03187	1.50438	1.10041	0.965845	5.37202
01-02-02-02-02-02-11.mp4	AV	Song	Calm	Strong	Dogs	R2	A11	0.9	0.616084	4	4.2	0.632456	4	3.9	0.567646	7.29	1.83116	1.07457	1.81882	1.42156	0.770835	0.524679	5.23856
01-02-02-02-02-02-12.mp4	AV	Song	Calm	Strong	Dogs	R2	A12	0.5	0.342269	2.5	2.6	0.966092	3	2.9	1.28668	2.75	2.42515	1.65305	2.05121	1.87566	1.0346	0.933723	4.63796
01-02-02-02-02-02-13.mp4	AV	Song	Calm	Strong	Dogs	R2	A13	0.9	0.616084	3	2.8	1.13529	3	3.3	1.33749	5.49	1.79328	1.17403	1.79435	1.15589	0.778095	0.436546	4.87152
01-02-02-02-02-02-14.mp4	AV	Song	Calm	Strong	Dogs	R2	A14	0.9	0.616084	3.5	3.3	1.1595	4.5	4.1	1.28668	6.66	2.19127	1.16267	1.6778	0.819988	0.652975	0.542287	4.77144
01-02-02-02-02-02-15.mp4	AV	Song	Calm	Strong	Dogs	R2	A15	1	0.684538	3	3.4	0.843274	4	3.9	0.737865	7.3	1.91269	1.92684	2.14179	2.48513	0.999566	1.27428	4.5045
01-02-02-02-02-02-16.mp4	AV	Song	Calm	Strong	Dogs	R2	A16	0.2	0.136908	2.5	2.6	0.699206	3	3.2	0.788811	1.16	1.78549	0.701882	1.73529	1.25456	1.00476	0.576743	5.13846
01-02-02-02-02-02-17.mp4	AV	Song	Calm	Strong	Dogs	R2	A17	0.8	0.54763	2	2.2	1.22927	3	2.7	1.41814	3.92	2.57414	2.28326	1.51791	1.3993	1.46275	0.801966	5.27194
01-02-02-02-02-02-19.mp4	AV	Song	Calm	Strong	Dogs	R2	A19	0	0	4	3.8	0.632456	4	3.8	1.31656	0	1.37201	0.56943	1.78357	1.29182	0.916636	0.788094	4.80481
01-02-02-02-02-02-20.mp4	AV	Song	Calm	Strong	Dogs	R2	A20	0.6	0.410723	3.5	3.7	1.05935	3.5	3.8	0.918937	4.5	1.74036	1.09383	1.4243	1.30119	0.843823	0.70746	5.37204
01-02-02-02-02-02-21.mp4	AV	Song	Calm	Strong	Dogs	R2	A21	1	0.684538	3.5	3.5	1.08012	4	3.8	0.788811	7.3	2.21575	1.34795	1.7459	0.967485	0.763963	0.777819	4.90492
01-02-02-02-02-02-22.mp4	AV	Song	Calm	Strong	Dogs	R2	A22	0.7	0.479176	2.5	2.7	0.823273	3	2.9	0.994429	3.92	2.01059	0.999463	1.69359	0.812965	1.05218	1.01511	5.30531
01-02-02-02-02-02-23.mp4	AV	Song	Calm	Strong	Dogs	R2	A23	0.9	0.616084	4	4	0.816497	4	3.8	1.31656	7.02	1.46517	0.967613	1.37005	1.02736	0.807188	0.666281	4.93827
01-02-02-02-02-02-24.mp4	AV	Song	Calm	Strong	Dogs	R2	A24	1	0.684538	3	3.4	0.699206	3	3.1	1.44914	6.5	1.37802	0.566214	1.39885	1.1713	0.574147	0.338769	4.97165
01-02-03-01-01-01-01.mp4	AV	Song	Happy	Normal	Kids	R1	A1	1	0.733832	4	3.9	1.1005	3.5	3.1	1.52388	7	1.95743	1.59024	1.48039	0.602904	0.962657	0.57302	4.57123
01-02-03-01-01-01-02.mp4	AV	Song	Happy	Normal	Kids	R1	A2	1	0.733832	4	4	0.666667	4	4	1.05409	8	2.07191	1.43128	2.50545	1.66938	1.35345	1.11343	5.23858
01-02-03-01-01-01-03.mp4	AV	Song	Happy	Normal	Kids	R1	A3	0.7	0.513683	4	3.5	1.08012	2.5	2.6	1.26491	4.27	1.91718	1.11472	2.37648	1.72407	0.729894	0.26493	4.80479
01-02-03-01-01-01-04.mp4	AV	Song	Happy	Normal	Kids	R1	A4	1	0.733832	3	3.1	0.875595	4	4	0.816497	7.1	2.09904	1.43948	1.89419	0.683145	1.18753	0.806484	4.40442
01-02-03-01-01-01-05.mp4	AV	Song	Happy	Normal	Kids	R1	A5	0.8	0.587066	4	3.4	1.42984	4	3.1	1.52388	5.2	3.92747	2.35559	2.20167	1.27698	1.28182	0.884551	3.97065
01-02-03-01-01-01-06.mp4	AV	Song	Happy	Normal	Kids	R1	A6	0.9	0.660449	3.5	3.3	0.823273	4	4	1.05409	6.57	1.55902	1.22227	1.74317	2.01228	1.02346	0.95761	4.83817
01-02-03-01-01-01-07.mp4	AV	Song	Happy	Normal	Kids	R1	A7	1	0.733832	4	3.7	0.674949	3	2.9	0.875595	6.6	2.30637	2.23988	2.42906	1.81263	1.24803	1.14077	4.27094
01-02-03-01-01-01-08.mp4	AV	Song	Happy	Normal	Kids	R1	A8	1	0.733832	5	4.5	0.707107	4	4	0.816497	8.5	1.48289	0.586034	1.39583	0.991916	1.33029	1.14868	4.60458
01-02-03-01-01-01-09.mp4	AV	Song	Happy	Normal	Kids	R1	A9	0.5	0.366916	3	3.1	0.737865	3	3.2	1.13529	3.15	2.6483	1.24589	2.38285	1.183	1.28433	1.16975	4.6046
01-02-03-01-01-01-10.mp4	AV	Song	Happy	Normal	Kids	R1	A10	1	0.733832	4.5	4.5	0.527046	4	3.7	1.41814	8.2	1.58564	0.839568	1.52977	0.922181	0.971364	0.537514	5.13846
01-02-03-01-01-01-11.mp4	AV	Song	Happy	Normal	Kids	R1	A11	0.9	0.660449	3.5	3.4	0.966092	4	3.7	0.823273	6.39	1.37935	0.682145	1.3404	0.762623	1.68302	1.32315	4.30431
01-02-03-01-01-01-12.mp4	AV	Song	Happy	Normal	Kids	R1	A12	1	0.733832	3.5	3.6	1.17379	4	3.8	1.22927	7.4	1.41975	0.777646	1.81337	1.87715	0.417992	0.198572	4.47112
01-02-03-01-01-01-13.mp4	AV	Song	Happy	Normal	Kids	R1	A13	0.9	0.660449	4	3.7	1.05935	4	3.5	1.2693	6.48	1.51471	0.944746	2.19314	1.75171	0.696886	0.468984	4.37104
01-02-03-01-01-01-14.mp4	AV	Song	Happy	Normal	Kids	R1	A14	0.9	0.660449	4	4	0.666667	4	4	0.942809	7.2	2.17053	1.66082	1.56191	1.06968	0.8801	0.583245	4.1041
01-02-03-01-01-01-15.mp4	AV	Song	Happy	Normal	Kids	R1	A15	0.8	0.587066	3	3.2	0.918937	3	3.2	1.13529	5.12	1.54869	0.527357	1.4901	0.711554	0.819045	0.454419	4.20419
01-02-03-01-01-01-16.mp4	AV	Song	Happy	Normal	Kids	R1	A16	0.7	0.513683	4	3.6	1.07497	4	3.8	1.22927	5.18	1.99575	1.06714	2.31862	1.28567	0.919275	0.467565	4.87154
01-02-03-01-01-01-17.mp4	AV	Song	Happy	Normal	Kids	R1	A17	0.5	0.366916	3	2.8	1.13529	3	3	1.24722	2.9	1.78234	0.645458	1.47168	0.723995	1.15138	1.06788	5.07175
01-02-03-01-01-01-19.mp4	AV	Song	Happy	Normal	Kids	R1	A19	1	0.733832	4	4.2	0.788811	4	3.7	1.41814	7.9	1.58732	0.758089	2.09829	1.56803	1.20466	0.775938	4.6046
01-02-03-01-01-01-20.mp4	AV	Song	Happy	Normal	Kids	R1	A20	1	0.733832	4	3.9	0.737865	3	3.1	1.52388	7	1.83122	0.935509	1.78059	1.31188	0.891418	0.639639	4.73806
01-02-03-01-01-01-21.mp4	AV	Song	Happy	Normal	Kids	R1	A21	0.9	0.660449	3	2.7	1.1595	3.5	3.3	1.1595	5.4	2.26034	2.0383	1.75127	0.942634	1.21774	0.804671	4.6046
01-02-03-01-01-01-22.mp4	AV	Song	Happy	Normal	Kids	R1	A22	0.9	0.660449	3	3.1	0.994429	3	2.8	0.788811	5.31	1.85245	0.882168	2.39921	1.55808	1.21079	0.934269	4.63796
01-02-03-01-01-01-23.mp4	AV	Song	Happy	Normal	Kids	R1	A23	0.9	0.660449	3	3.3	0.948683	3	3	1.05409	5.67	2.26167	1.89003	1.65844	1.18653	1.3412	0.85196	4.5045
01-02-03-01-01-01-24.mp4	AV	Song	Happy	Normal	Kids	R1	A24	1	0.733832	3.5	3.7	1.05935	3	2.8	1.13529	6.5	1.87231	1.18894	2.53243	1.95287	1.29336	1.13558	4.83817
01-02-03-01-01-02-01.mp4	AV	Song	Happy	Normal	Kids	R2	A1	1	0.733832	4	4.2	0.632456	4	3.7	1.25167	7.9	1.68744	0.535816	2.22714	1.70379	0.921356	0.907145	4.47112
01-02-03-01-01-02-02.mp4	AV	Song	Happy	Normal	Kids	R2	A2	0.9	0.660449	4	3.8	0.788811	4	3.4	1.42984	6.48	2.1851	0.944232	1.39676	0.959419	1.13856	1.06223	5.33867
01-02-03-01-01-02-03.mp4	AV	Song	Happy	Normal	Kids	R2	A3	0.6	0.440299	4	4	0.666667	3	2.9	1.28668	4.14	2.52476	1.32624	1.99115	1.33737	1.78064	0.891475	4.73808
01-02-03-01-01-02-04.mp4	AV	Song	Happy	Normal	Kids	R2	A4	0.9	0.660449	4	4.2	0.632456	4	3.8	0.918937	7.2	1.86376	0.891613	1.92476	0.959322	1.1659	0.812146	4.33767
01-02-03-01-01-02-05.mp4	AV	Song	Happy	Normal	Kids	R2	A5	1	0.733832	4.5	4.4	0.699206	3.5	3.3	1.25167	7.7	1.73564	0.756838	2.15501	0.729459	1.4815	0.926079	4.10408
01-02-03-01-01-02-06.mp4	AV	Song	Happy	Normal	Kids	R2	A6	0.8	0.587066	3	3.2	0.632456	3.5	3.4	0.699206	5.28	1.77356	0.564944	2.00239	1.63289	0.645168	0.551465	4.6046
01-02-03-01-01-02-07.mp4	AV	Song	Happy	Normal	Kids	R2	A7	0.8	0.587066	4	3.6	1.3499	3	3.2	1.22927	5.44	1.92402	1.17145	1.53261	1.91103	1.39437	1.40261	4.30431
01-02-03-01-01-02-08.mp4	AV	Song	Happy	Normal	Kids	R2	A8	1	0.733832	5	4.8	0.421637	4.5	4.1	1.1005	8.9	1.66609	0.876334	1.8236	1.06488	1.244	1.33624	4.53785
01-02-03-01-01-02-09.mp4	AV	Song	Happy	Normal	Kids	R2	A9	0.5	0.366916	3	2.8	0.632456	2.5	2.6	1.26491	2.7	2.43014	2.25328	1.32765	0.809332	1.00365	0.92618	4.77142
01-02-03-01-01-02-10.mp4	AV	Song	Happy	Normal	Kids	R2	A10	0.9	0.660449	5	4.5	0.707107	5	4.4	0.843274	8.01	2.21808	1.01296	1.52294	1.18533	0.863592	0.909686	5.03835
01-02-03-01-01-02-11.mp4	AV	Song	Happy	Normal	Kids	R2	A11	0.6	0.440299	4	3.6	1.07497	4	3.8	1.22927	4.44	2.36501	1.83929	1.66633	0.90166	1.37971	0.741475	4.33767
01-02-03-01-01-02-12.mp4	AV	Song	Happy	Normal	Kids	R2	A12	1	0.733832	5	4.3	0.948683	4	4.1	0.737865	8.4	2.03253	0.854797	1.4767	0.814506	0.485152	0.345763	4.47112
01-02-03-01-01-02-13.mp4	AV	Song	Happy	Normal	Kids	R2	A13	1	0.733832	3	3.1	0.567646	3.5	3.2	1.22927	6.3	1.8233	0.865669	2.13203	1.30139	0.655189	0.387189	4.4044
01-02-03-01-01-02-14.mp4	AV	Song	Happy	Normal	Kids	R2	A14	0.8	0.587066	4	3.8	1.39841	3	3.1	1.44914	5.52	2.54794	1.12888	1.4595	1.37221	1.01868	0.923673	4.23756
01-02-03-01-01-02-15.mp4	AV	Song	Happy	Normal	Kids	R2	A15	0.7	0.513683	3.5	3.2	1.0328	3.5	3.1	1.37032	4.41	1.7556	0.503848	2.03282	1.55293	0.958941	0.716532	4.13746
01-02-03-01-01-02-16.mp4	AV	Song	Happy	Normal	Kids	R2	A16	0.8	0.587066	4	3.9	1.1005	4	3.9	1.1005	6.24	1.09424	0.656431	1.96081	1.34698	1.02915	1.19714	4.70469
01-02-03-01-01-02-17.mp4	AV	Song	Happy	Normal	Kids	R2	A17	0.6	0.440299	3.5	3.4	0.966092	4	3.8	0.632456	4.32	1.62678	0.996895	1.53296	1.54911	1.11184	0.944945	5.005
01-02-03-01-01-02-19.mp4	AV	Song	Happy	Normal	Kids	R2	A19	1	0.733832	3.5	3.3	0.823273	3.5	3.6	0.699206	6.9	2.28995	2.21261	2.07141	1.70727	1.52299	1.43741	4.53785
01-02-03-01-01-02-20.mp4	AV	Song	Happy	Normal	Kids	R2	A20	1	0.733832	3.5	3.7	0.823273	4	3.5	1.08012	7.2	2.15506	0.644778	1.56638	0.976763	0.967045	0.823664	4.47115
01-02-03-01-01-02-21.mp4	AV	Song	Happy	Normal	Kids	R2	A21	0.8	0.587066	3	3.4	0.843274	4	3.6	0.843274	5.6	2.0034	1.87731	1.7408	0.948749	1.21953	0.864788	4.57123
01-02-03-01-01-02-22.mp4	AV	Song	Happy	Normal	Kids	R2	A22	0.8	0.587066	3.5	3.4	0.699206	3	3.1	0.737865	5.2	2.44688	1.27908	2.78406	1.70372	0.819175	0.493109	4.67133
01-02-03-01-01-02-23.mp4	AV	Song	Happy	Normal	Kids	R2	A23	0.7	0.513683	2.5	2.8	1.0328	3	3.2	1.31656	4.2	2.1713	0.969673	1.4566	0.950595	0.610728	0.384238	4.80479
01-02-03-01-01-02-24.mp4	AV	Song	Happy	Normal	Kids	R2	A24	0.8	0.587066	3.5	3.3	0.823273	3	2.8	1.47573	4.88	2.03311	1.8104	1.54769	1.54807	0.979775	0.858523	5.005
01-02-03-01-02-01-01.mp4	AV	Song	Happy	Normal	Dogs	R1	A1	1	0.733832	4	4	0.942809	3	3.3	1.41814	7.3	1.50654	0.636543	1.76873	1.01481	0.928934	1.14602	4.33767
01-02-03-01-02-01-02.mp4	AV	Song	Happy	Normal	Dogs	R1	A2	0.9	0.660449	3	3.4	0.699206	3	3	1.1547	5.76	1.82034	0.810406	1.94788	1.29896	0.834802	0.680572	4.63796
01-02-03-01-02-01-03.mp4	AV	Song	Happy	Normal	Dogs	R1	A3	0.4	0.293533	3	3.1	0.994429	2.5	2.4	1.26491	2.2	2.74208	1.44742	2.29467	2.0085	0.722137	0.428949	4.53787
01-02-03-01-02-01-04.mp4	AV	Song	Happy	Normal	Dogs	R1	A4	0.9	0.660449	5	4.7	0.483046	3	3.2	1.22927	7.11	2.29037	2.04607	1.69669	1.53372	1.21748	1.24993	4.37104
01-02-03-01-02-01-05.mp4	AV	Song	Happy	Normal	Dogs	R1	A5	0.9	0.660449	4	3.5	0.971825	3	3.3	1.1595	6.12	1.70334	0.94189	1.88355	1.11739	0.735173	0.370696	4.43777
01-02-03-01-02-01-06.mp4	AV	Song	Happy	Normal	Dogs	R1	A6	0.9	0.660449	4	3.9	0.737865	4	4.1	0.737865	7.2	1.52296	0.729911	1.46524	0.608689	1.69116	1.0374	4.47112
01-02-03-01-02-01-07.mp4	AV	Song	Happy	Normal	Dogs	R1	A7	1	0.733832	4	3.8	0.788811	2	2.3	1.33749	6.1	1.46936	0.848526	1.51469	1.10319	0.764888	0.29246	4.33767
01-02-03-01-02-01-08.mp4	AV	Song	Happy	Normal	Dogs	R1	A8	0.9	0.660449	4	3.7	1.1595	3.5	3.7	1.05935	6.66	1.98581	0.823877	1.5436	0.937836	0.978755	0.664483	4.6046
01-02-03-01-02-01-09.mp4	AV	Song	Happy	Normal	Dogs	R1	A9	0.8	0.587066	3	3.1	0.994429	2.5	2.5	1.35401	4.48	2.81524	1.77694	1.98986	1.38094	0.923361	0.580455	4.70471
01-02-03-01-02-01-10.mp4	AV	Song	Happy	Normal	Dogs	R1	A10	1	0.733832	4.5	4.1	1.1005	4	3.5	1.43372	7.6	1.96884	1.32534	1.28225	0.590568	0.720011	0.36226	5.4054
01-02-03-01-02-01-11.mp4	AV	Song	Happy	Normal	Dogs	R1	A11	0.8	0.587066	4	3.9	0.875595	4	4.3	0.674949	6.56	2.77388	2.01806	1.6573	0.706303	0.81385	0.699365	4.37104
01-02-03-01-02-01-12.mp4	AV	Song	Happy	Normal	Dogs	R1	A12	0.8	0.587066	3.5	3.6	0.966092	3	3.1	1.44914	5.36	1.40205	1.25361	1.91361	1.14229	0.900024	0.954281	4.60458
01-02-03-01-02-01-13.mp4	AV	Song	Happy	Normal	Dogs	R1	A13	1	0.733832	4	4.1	0.875595	4	4	0.666667	8.1	1.78511	1.0791	1.53319	0.761757	1.00851	0.67164	4.53787
01-02-03-01-02-01-14.mp4	AV	Song	Happy	Normal	Dogs	R1	A14	1	0.733832	3	3.5	0.707107	3	3.2	0.918937	6.7	2.84717	2.31877	1.63403	1.36363	1.4406	1.27397	4.13746
01-02-03-01-02-01-15.mp4	AV	Song	Happy	Normal	Dogs	R1	A15	0.9	0.660449	3	3.4	1.17379	3	3.2	1.0328	5.94	1.94451	0.727886	2.49371	1.61893	1.51272	1.29262	4.33767
01-02-03-01-02-01-16.mp4	AV	Song	Happy	Normal	Dogs	R1	A16	1	0.733832	4	3.6	0.843274	4	4.3	0.674949	7.9	1.97871	1.41637	2.91042	1.53442	1.29735	0.756164	4.73806
01-02-03-01-02-01-17.mp4	AV	Song	Happy	Normal	Dogs	R1	A17	0.7	0.513683	3	3.3	0.823273	3	2.9	0.994429	4.34	2.29732	0.776026	2.10593	1.41249	1.04063	0.823235	4.03737
01-02-03-01-02-01-19.mp4	AV	Song	Happy	Normal	Dogs	R1	A19	1	0.733832	4	3.9	0.875595	4	3.6	1.3499	7.5	1.62839	1.08323	2.29828	1.63466	1.22842	1.23495	4.47115
01-02-03-01-02-01-20.mp4	AV	Song	Happy	Normal	Dogs	R1	A20	1	0.733832	4	4	0.816497	4	3.6	0.699206	7.6	1.64385	1.265	1.89098	1.66847	0.7711	0.67243	4.87154
01-02-03-01-02-01-21.mp4	AV	Song	Happy	Normal	Dogs	R1	A21	0.6	0.440299	3	3.2	1.0328	3	2.8	0.918937	3.6	2.34183	1.86752	1.32144	0.802475	0.772707	0.478922	4.57123
01-02-03-01-02-01-22.mp4	AV	Song	Happy	Normal	Dogs	R1	A22	1	0.733832	3	3.4	0.843274	4	3.6	0.966092	7	1.99377	1.07456	1.09868	0.803691	1.48282	1.47741	4.63798
01-02-03-01-02-01-23.mp4	AV	Song	Happy	Normal	Dogs	R1	A23	0.7	0.513683	3	3.2	1.0328	4	3.6	1.17379	4.76	2.36802	2.07481	1.87696	1.25167	1.04221	0.562586	4.60458
01-02-03-01-02-01-24.mp4	AV	Song	Happy	Normal	Dogs	R1	A24	0.9	0.660449	4	4.1	0.994429	3	3.2	1.47573	6.57	1.61756	0.538028	2.01735	1.81556	0.942791	0.667031	4.27094
01-02-03-01-02-02-01.mp4	AV	Song	Happy	Normal	Dogs	R2	A1	0.9	0.660449	4	4	1.05409	4.5	4.3	0.823273	7.47	2.72088	1.9447	1.84093	1.58862	1.0774	0.918446	4.5045
01-02-03-01-02-02-02.mp4	AV	Song	Happy	Normal	Dogs	R2	A2	1	0.733832	4	3.5	0.707107	3.5	3.5	0.849837	7	2.89676	2.48787	2.2125	2.17777	1.07838	0.957992	4.63796
01-02-03-01-02-02-03.mp4	AV	Song	Happy	Normal	Dogs	R2	A3	0.6	0.440299	3.5	3.2	1.47573	1	1.7	1.25167	2.94	2.84681	1.85326	2.28092	1.52254	1.64288	1.07081	4.53787
01-02-03-01-02-02-04.mp4	AV	Song	Happy	Normal	Dogs	R2	A4	0.9	0.660449	3	3.1	0.994429	3	3.2	0.632456	5.67	1.68264	0.945342	1.40902	0.937509	1.14931	0.747677	4.47115
01-02-03-01-02-02-05.mp4	AV	Song	Happy	Normal	Dogs	R2	A5	0.8	0.587066	4	4.3	0.674949	4.5	4	1.33333	6.64	1.8297	1.57418	1.91985	1.43571	1.31677	1.22091	4.20421
01-02-03-01-02-02-06.mp4	AV	Song	Happy	Normal	Dogs	R2	A6	0.9	0.660449	3	3.5	0.971825	3.5	3.4	1.26491	6.21	2.13783	1.0455	1.54318	0.744648	0.668369	0.598646	4.53787
01-02-03-01-02-02-07.mp4	AV	Song	Happy	Normal	Dogs	R2	A7	0.9	0.660449	3	3	1.05409	2.5	2.8	1.39841	5.22	1.56294	0.757376	1.78873	1.36148	0.805483	0.447034	4.37104
01-02-03-01-02-02-08.mp4	AV	Song	Happy	Normal	Dogs	R2	A8	0.9	0.660449	4.5	4.5	0.527046	4	4	0.942809	7.65	1.32052	0.786251	1.43943	0.782964	1.03614	0.91684	4.6046
01-02-03-01-02-02-09.mp4	AV	Song	Happy	Normal	Dogs	R2	A9	0.8	0.587066	3	2.7	0.823273	4	3.7	1.41814	5.12	2.03274	0.948458	2.50408	1.525	1.62639	1.11283	4.6046
01-02-03-01-02-02-10.mp4	AV	Song	Happy	Normal	Dogs	R2	A10	0.9	0.660449	4.5	4.3	0.948683	3.5	3.4	1.64655	6.93	1.3876	0.715346	1.77922	1.69217	1.22294	0.790018	5.03835
01-02-03-01-02-02-11.mp4	AV	Song	Happy	Normal	Dogs	R2	A11	0.8	0.587066	3	2.8	0.788811	3	3.2	1.0328	4.8	1.90296	1.59981	1.67624	1.38147	0.562093	0.500837	4.43777
01-02-03-01-02-02-12.mp4	AV	Song	Happy	Normal	Dogs	R2	A12	0.9	0.660449	4.5	4.4	0.699206	3.5	3.3	1.1595	6.93	1.79968	0.718204	2.14776	1.00575	0.852904	0.639881	4.5045
01-02-03-01-02-02-13.mp4	AV	Song	Happy	Normal	Dogs	R2	A13	0.9	0.660449	3.5	3.5	0.527046	4	3.9	0.875595	6.66	1.50631	0.687287	2.28771	1.16512	0.861912	0.773194	4.53787
01-02-03-01-02-02-14.mp4	AV	Song	Happy	Normal	Dogs	R2	A14	0.7	0.513683	3	3.4	0.966092	2.5	2.7	1.1595	4.27	3.59816	2.22404	1.56369	0.802991	1.02406	0.86805	4.07073
01-02-03-01-02-02-15.mp4	AV	Song	Happy	Normal	Dogs	R2	A15	1	0.733832	4	3.8	1.13529	4	4	1.24722	7.8	1.74293	1.14616	1.21179	0.904878	0.70311	0.762985	4.17083
01-02-03-01-02-02-16.mp4	AV	Song	Happy	Normal	Dogs	R2	A16	1	0.733832	4	3.9	1.1005	4	3.4	1.50555	7.3	1.4469	0.870596	1.66787	1.01016	1.03734	0.875473	4.6046
01-02-03-01-02-02-17.mp4	AV	Song	Happy	Normal	Dogs	R2	A17	0.6	0.440299	3	3.1	1.19722	3.5	3.5	1.35401	3.96	1.96116	0.978132	1.00695	0.510194	0.91436	0.715541	5.005
01-02-03-01-02-02-19.mp4	AV	Song	Happy	Normal	Dogs	R2	A19	1	0.733832	3	3.4	1.26491	3	3.5	1.2693	6.9	1.83821	1.17338	2.24597	1.5464	1.18416	1.20534	4.43777
01-02-03-01-02-02-20.mp4	AV	Song	Happy	Normal	Dogs	R2	A20	1	0.733832	5	4.6	0.699206	4.5	3.6	1.7127	8.2	2.79209	1.68782	1.75261	1.19849	0.91565	1.18937	4.83817
01-02-03-01-02-02-21.mp4	AV	Song	Happy	Normal	Dogs	R2	A21	0.8	0.587066	3	2.6	1.07497	3.5	3.2	1.22927	4.64	2.03601	1.24912	1.73728	1.22941	0.821352	0.560881	4.5045
01-02-03-01-02-02-22.mp4	AV	Song	Happy	Normal	Dogs	R2	A22	1	0.733832	3	3.3	1.05935	4	3.6	0.843274	6.9	1.75994	0.583227	1.97761	1.66246	1.47609	1.3053	4.77144
01-02-03-01-02-02-23.mp4	AV	Song	Happy	Normal	Dogs	R2	A23	0.6	0.440299	3.5	3.4	0.699206	2.5	2.8	1.22927	3.72	2.73768	2.32119	2.34687	1.73168	0.909859	0.723805	4.47115
01-02-03-01-02-02-24.mp4	AV	Song	Happy	Normal	Dogs	R2	A24	1	0.733832	4	3.9	0.994429	2	2.7	1.41814	6.6	2.44751	1.38443	1.69136	1.5612	0.861888	0.524653	4.63796
01-02-03-02-01-01-01.mp4	AV	Song	Happy	Strong	Kids	R1	A1	1	0.733832	4.5	4.5	0.527046	4	3.4	1.57762	7.9	1.48144	0.808792	1.53608	0.930422	1.08973	0.963804	4.83817
01-02-03-02-01-01-02.mp4	AV	Song	Happy	Strong	Kids	R1	A2	1	0.733832	4	4.3	0.483046	4	3.4	1.57762	7.7	1.51132	0.689639	0.834634	0.537722	0.688631	0.887275	4.30429
01-02-03-02-01-01-03.mp4	AV	Song	Happy	Strong	Kids	R1	A3	0.7	0.513683	4.5	4.3	0.948683	2	2.5	1.64992	4.76	2.03319	0.481449	1.48538	0.979937	0.946735	0.765564	4.53787
01-02-03-02-01-01-04.mp4	AV	Song	Happy	Strong	Kids	R1	A4	1	0.733832	4.5	4.2	1.0328	5	3.9	1.66333	8.1	1.77804	1.1128	1.79283	1.17209	0.887975	0.684062	4.27094
01-02-03-02-01-01-05.mp4	AV	Song	Happy	Strong	Kids	R1	A5	0.8	0.587066	4	3.8	1.0328	3	3	1.24722	5.44	1.92823	1.45213	2.22649	1.46367	1.09341	0.547105	5.20519
01-02-03-02-01-01-06.mp4	AV	Song	Happy	Strong	Kids	R1	A6	1	0.733832	5	4.5	0.849837	3.5	3.7	1.05935	8.2	2.04262	0.700701	2.14455	1.78119	1.14332	0.654166	4.5045
01-02-03-02-01-01-07.mp4	AV	Song	Happy	Strong	Kids	R1	A7	0.9	0.660449	4.5	4.4	0.699206	4	3.4	1.77639	7.02	1.81967	0.958364	1.86052	2.04031	1.13667	1.30253	4.27094
01-02-03-02-01-01-08.mp4	AV	Song	Happy	Strong	Kids	R1	A8	1	0.733832	5	5	0	5	4.2	1.31656	9.2	1.28861	0.676008	1.14727	0.900378	0.593747	0.583587	4.63796
01-02-03-02-01-01-09.mp4	AV	Song	Happy	Strong	Kids	R1	A9	0.8	0.587066	4	3.8	0.918937	3.5	3.4	0.966092	5.76	1.83109	0.460811	2.52992	1.21543	1.55988	0.901524	5.03835
01-02-03-02-01-01-10.mp4	AV	Song	Happy	Strong	Kids	R1	A10	1	0.733832	4	3.7	1.49443	3.5	3.2	1.39841	6.9	1.82913	1.19172	1.98082	1.77214	0.802253	0.624967	4.97163
01-02-03-02-01-01-11.mp4	AV	Song	Happy	Strong	Kids	R1	A11	1	0.733832	3	3	0.471405	3	3.1	1.19722	6.1	1.75019	0.905091	1.54935	1.31006	0.766422	0.562326	4.27094
01-02-03-02-01-01-12.mp4	AV	Song	Happy	Strong	Kids	R1	A12	0.9	0.660449	5	4.6	0.516398	4	3.7	1.49443	7.47	2.06017	0.979989	1.77379	1.51569	0.751326	0.667354	4.4044
01-02-03-02-01-01-13.mp4	AV	Song	Happy	Strong	Kids	R1	A13	1	0.733832	4	3.8	0.788811	3	2.9	1.1005	6.7	1.79548	0.980117	1.40063	0.525643	0.750554	0.461479	4.4044
01-02-03-02-01-01-14.mp4	AV	Song	Happy	Strong	Kids	R1	A14	1	0.733832	5	4.2	1.13529	3.5	3.5	1.35401	7.7	1.58206	0.977809	2.21117	1.81833	1.30747	1.23864	4.004
01-02-03-02-01-01-15.mp4	AV	Song	Happy	Strong	Kids	R1	A15	1	0.733832	3	3.5	0.971825	4	3.6	1.3499	7.1	1.48094	0.883004	1.79392	0.842098	1.4111	0.958803	4.20421
01-02-03-02-01-01-16.mp4	AV	Song	Happy	Strong	Kids	R1	A16	0.9	0.660449	4.5	4.5	0.527046	4.5	4.3	0.948683	7.92	1.5802	0.599257	1.26305	0.981506	0.855373	1.01331	4.57123
01-02-03-02-01-01-17.mp4	AV	Song	Happy	Strong	Kids	R1	A17	1	0.733832	3.5	3.4	0.966092	3	3.3	1.05935	6.7	1.71398	0.787165	1.74991	1.57002	1.39613	1.10163	5.07173
01-02-03-02-01-01-19.mp4	AV	Song	Happy	Strong	Kids	R1	A19	0.9	0.660449	4	3.5	0.971825	3.5	3.5	0.849837	6.3	2.10803	1.41724	1.21359	0.70649	0.62864	0.493468	4.37104
01-02-03-02-01-01-20.mp4	AV	Song	Happy	Strong	Kids	R1	A20	1	0.733832	5	4.7	0.483046	4	3.8	1.0328	8.5	2.21538	1.43102	1.63674	1.84377	1.15773	0.680964	4.1041
01-02-03-02-01-01-21.mp4	AV	Song	Happy	Strong	Kids	R1	A21	1	0.733832	3.5	3.6	0.966092	3.5	3.6	0.966092	7.2	1.84593	1.07949	1.58814	1.06939	1.23421	1.29695	4.47115
01-02-03-02-01-01-22.mp4	AV	Song	Happy	Strong	Kids	R1	A22	0.8	0.587066	4	4	0.816497	3	3.2	1.0328	5.76	2.28628	1.40936	1.20943	0.892766	0.923152	0.66961	4.83817
01-02-03-02-01-01-23.mp4	AV	Song	Happy	Strong	Kids	R1	A23	1	0.733832	3.5	3.4	0.966092	1	2	1.63299	5.4	2.15268	1.30738	3.03699	1.75211	1.18869	0.797954	4.4044
01-02-03-02-01-01-24.mp4	AV	Song	Happy	Strong	Kids	R1	A24	1	0.733832	5	4.6	0.699206	4.5	3.5	1.77951	8.1	2.24246	1.47491	1.70431	0.88877	1.17593	0.775712	4.73808
01-02-03-02-01-02-01.mp4	AV	Song	Happy	Strong	Kids	R2	A1	1	0.733832	5	4.7	0.483046	4	3.6	1.64655	8.3	2.10607	1.37062	1.18812	0.871988	1.2264	0.917394	4.80479
01-02-03-02-01-02-02.mp4	AV	Song	Happy	Strong	Kids	R2	A2	0.9	0.660449	5	4.3	0.948683	4	3.8	1.22927	7.29	1.95644	1.1717	0.930192	0.479777	0.645363	0.473207	4.43777
01-02-03-02-01-02-03.mp4	AV	Song	Happy	Strong	Kids	R2	A3	0.5	0.366916	4	3.5	1.58114	1.5	2.4	1.7127	2.95	2.4549	1.2817	1.95089	1.48559	1.03902	0.503353	4.53787
01-02-03-02-01-02-04.mp4	AV	Song	Happy	Strong	Kids	R2	A4	0.8	0.587066	4	3.9	0.994429	3	3.2	1.0328	5.68	2.07491	1.44224	2.12998	1.12125	0.855972	0.63298	4.27092
01-02-03-02-01-02-05.mp4	AV	Song	Happy	Strong	Kids	R2	A5	1	0.733832	3.5	3.5	1.08012	3	2.7	1.1595	6.2	2.58655	1.86498	1.82582	1.339	1.21355	1.012	4.87152
01-02-03-02-01-02-06.mp4	AV	Song	Happy	Strong	Kids	R2	A6	1	0.733832	5	4.6	0.699206	5	4.1	1.37032	8.7	1.33961	0.580914	1.19009	1.18247	0.509987	0.240831	4.63798
01-02-03-02-01-02-07.mp4	AV	Song	Happy	Strong	Kids	R2	A7	0.9	0.660449	4	4.1	0.737865	4	3.5	1.43372	6.84	1.55459	1.01066	2.4124	2.17243	1.22446	0.682517	4.27094
01-02-03-02-01-02-08.mp4	AV	Song	Happy	Strong	Kids	R2	A8	0.9	0.660449	5	4.5	1.08012	5	3.8	1.61933	7.47	2.06474	1.7651	1.65276	0.791638	0.836384	0.735243	4.5045
01-02-03-02-01-02-09.mp4	AV	Song	Happy	Strong	Kids	R2	A9	0.8	0.587066	3	3.2	1.0328	3	3.3	1.25167	5.2	1.89918	0.699664	2.38543	2.16624	1.24013	1.0651	4.43777
01-02-03-02-01-02-10.mp4	AV	Song	Happy	Strong	Kids	R2	A10	1	0.733832	4	4.3	0.674949	3	3.4	0.843274	7.7	1.45242	0.820884	0.693445	0.590503	0.660647	0.608529	4.77142
01-02-03-02-01-02-11.mp4	AV	Song	Happy	Strong	Kids	R2	A11	1	0.733832	3	3.6	0.843274	3	3.5	0.971825	7.1	1.29355	0.441125	1.76663	0.798125	0.759887	0.515988	4.23758
01-02-03-02-01-02-12.mp4	AV	Song	Happy	Strong	Kids	R2	A12	1	0.733832	4	4.3	0.483046	4	3.5	1.50923	7.8	1.65533	0.685995	1.61966	1.02225	0.849669	0.569372	4.37102
01-02-03-02-01-02-13.mp4	AV	Song	Happy	Strong	Kids	R2	A13	1	0.733832	5	4.1	1.37032	4	4.1	0.875595	8.2	1.77605	0.868608	1.53084	1.59375	1.01413	0.730151	4.43777
01-02-03-02-01-02-14.mp4	AV	Song	Happy	Strong	Kids	R2	A14	0.8	0.587066	5	4.8	0.421637	4	3.9	1.28668	6.96	2.19564	1.00279	2.243	1.42655	0.913914	0.722227	4.13746
01-02-03-02-01-02-15.mp4	AV	Song	Happy	Strong	Kids	R2	A15	1	0.733832	4	3.4	0.966092	4	3	1.41421	6.4	1.87475	0.771426	1.88257	1.80066	0.947662	0.534917	4.1041
01-02-03-02-01-02-16.mp4	AV	Song	Happy	Strong	Kids	R2	A16	1	0.733832	4	3.9	0.737865	4.5	4.3	0.823273	8.2	1.9026	1.53955	1.88345	1.44677	1.2261	0.883157	4.83817
01-02-03-02-01-02-17.mp4	AV	Song	Happy	Strong	Kids	R2	A17	1	0.733832	4	4	0.666667	4	3.7	1.05935	7.7	1.71096	1.03856	1.45273	0.937731	0.590356	0.384382	4.80481
01-02-03-02-01-02-19.mp4	AV	Song	Happy	Strong	Kids	R2	A19	1	0.733832	4.5	4.3	0.823273	4	3.7	1.33749	8	1.55279	0.843115	1.71293	1.68627	1.07024	1.12987	4.4044
01-02-03-02-01-02-20.mp4	AV	Song	Happy	Strong	Kids	R2	A20	1	0.733832	5	4.6	0.516398	2.5	3	1.63299	7.6	2.6351	1.09028	2.25022	2.06429	1.16634	1.34086	4.33767
01-02-03-02-01-02-21.mp4	AV	Song	Happy	Strong	Kids	R2	A21	0.8	0.587066	4	3.6	1.07497	4	4.2	0.788811	6.24	2.00537	1.12447	1.06779	0.685677	0.860254	0.69499	4.47112
01-02-03-02-01-02-22.mp4	AV	Song	Happy	Strong	Kids	R2	A22	0.9	0.660449	3	3.5	0.971825	3	3.3	1.25167	6.12	1.67706	0.804267	1.84613	1.51497	1.01327	0.835242	4.83817
01-02-03-02-01-02-23.mp4	AV	Song	Happy	Strong	Kids	R2	A23	0.7	0.513683	3	3.2	0.788811	3	2.9	1.37032	4.27	2.54777	2.32031	1.34223	0.809206	1.22814	0.950968	4.63796
01-02-03-02-01-02-24.mp4	AV	Song	Happy	Strong	Kids	R2	A24	0.8	0.587066	4.5	4.2	0.918937	1.5	2.2	1.54919	5.12	2.70086	1.88602	1.90182	1.15753	0.913438	0.496938	4.93827
01-02-03-02-02-01-01.mp4	AV	Song	Happy	Strong	Dogs	R1	A1	1	0.733832	4.5	4.4	0.699206	4.5	3.7	1.70294	8.1	1.85256	0.807182	2.45484	1.46719	1.0147	0.679943	4.93827
01-02-03-02-02-01-02.mp4	AV	Song	Happy	Strong	Dogs	R1	A2	0.9	0.660449	4	4.3	0.674949	3.5	3.4	1.26491	6.93	1.50842	0.696985	2.20933	1.27426	1.04084	0.952668	4.5045
01-02-03-02-02-01-03.mp4	AV	Song	Happy	Strong	Dogs	R1	A3	0.8	0.587066	4	4.1	0.737865	3.5	3.5	1.08012	6.08	2.61249	1.59788	1.7728	1.19396	0.902031	0.635032	4.87154
01-02-03-02-02-01-04.mp4	AV	Song	Happy	Strong	Dogs	R1	A4	0.8	0.587066	4	4.2	0.918937	5	4.1	1.37032	6.64	2.1458	0.886169	1.44558	0.784873	1.03826	0.989612	4.27094
01-02-03-02-02-01-05.mp4	AV	Song	Happy	Strong	Dogs	R1	A5	0.9	0.660449	4	4.3	0.674949	3	3.2	1.54919	6.75	1.37691	0.792662	2.52099	1.37741	1.48	0.832317	4.63798
01-02-03-02-02-01-06.mp4	AV	Song	Happy	Strong	Dogs	R1	A6	0.9	0.660449	4	4.1	0.875595	3.5	3.4	1.64655	6.75	2.62586	1.8163	1.95404	1.46126	1.28718	1.50887	4.13746
01-02-03-02-02-01-07.mp4	AV	Song	Happy	Strong	Dogs	R1	A7	1	0.733832	5	4.1	1.19722	3	3.2	1.31656	7.3	1.7625	0.503613	2.05408	1.52479	0.982105	0.771508	4.13746
01-02-03-02-02-01-08.mp4	AV	Song	Happy	Strong	Dogs	R1	A8	1	0.733832	4.5	4.2	1.0328	5	4.3	1.05935	8.5	1.63808	0.657236	1.82566	1.56042	0.602499	0.612403	4.57123
01-02-03-02-02-01-09.mp4	AV	Song	Happy	Strong	Dogs	R1	A9	0.9	0.660449	4	4	0.942809	3	3.4	1.50555	6.66	2.14584	1.51009	2.83973	2.55122	1.11264	0.896567	4.63798
01-02-03-02-02-01-10.mp4	AV	Song	Happy	Strong	Dogs	R1	A10	1	0.733832	5	4.7	0.674949	4.5	3.6	1.7127	8.3	2.61487	1.86265	1.54148	0.873684	1.01662	0.476817	4.80481
01-02-03-02-02-01-11.mp4	AV	Song	Happy	Strong	Dogs	R1	A11	1	0.733832	3	3.3	0.483046	3.5	3.4	1.07497	6.7	1.7563	1.14326	1.39819	1.47279	1.01051	0.872565	3.9039
01-02-03-02-02-01-12.mp4	AV	Song	Happy	Strong	Dogs	R1	A12	1	0.733832	5	4.7	0.674949	3.5	3.6	1.42984	8.3	2.30935	1.52278	1.9637	0.93064	1.22612	1.13649	4.43777
01-02-03-02-02-01-13.mp4	AV	Song	Happy	Strong	Dogs	R1	A13	1	0.733832	4	3.9	0.737865	4	4.2	0.632456	8.1	1.9472	1.2304	2.59011	1.72328	0.961816	0.557238	4.47115
01-02-03-02-02-01-14.mp4	AV	Song	Happy	Strong	Dogs	R1	A14	0.7	0.513683	5	4.7	0.674949	4	3.6	1.3499	5.81	1.98523	1.08033	2.27083	1.65922	0.952548	0.838127	4.03735
01-02-03-02-02-01-15.mp4	AV	Song	Happy	Strong	Dogs	R1	A15	1	0.733832	4	4.2	0.918937	4	3.4	1.57762	7.6	1.26048	0.474888	1.16684	0.707044	0.996926	0.875016	4.13748
01-02-03-02-02-01-16.mp4	AV	Song	Happy	Strong	Dogs	R1	A16	1	0.733832	5	4.7	0.483046	5	4.4	0.843274	9.1	1.95021	1.10233	1.69488	1.38645	0.479593	0.44849	4.37104
01-02-03-02-02-01-17.mp4	AV	Song	Happy	Strong	Dogs	R1	A17	0.6	0.440299	3	3.1	1.66333	3	3.1	1.66333	3.72	2.06168	1.28002	1.30715	1.12626	0.734808	0.442403	5.005
01-02-03-02-02-01-19.mp4	AV	Song	Happy	Strong	Dogs	R1	A19	1	0.733832	4	3.9	0.994429	3	3.4	1.07497	7.3	1.65892	0.30004	1.10256	0.535545	0.875846	0.575737	4.17083
01-02-03-02-02-01-20.mp4	AV	Song	Happy	Strong	Dogs	R1	A20	1	0.733832	5	5	0	4	3.7	1.33749	8.7	2.01753	1.94057	1.5122	1.81564	1.34702	1.2989	4.1041
01-02-03-02-02-01-21.mp4	AV	Song	Happy	Strong	Dogs	R1	A21	1	0.733832	3	3.5	0.707107	3	3.2	0.788811	6.7	2.59119	1.01495	2.16847	1.80335	1.08045	0.477119	4.57123
01-02-03-02-02-01-22.mp4	AV	Song	Happy	Strong	Dogs	R1	A22	1	0.733832	4	3.6	1.26491	4.5	3.8	1.61933	7.4	1.8281	0.478308	1.38486	0.727309	1.06235	0.785048	4.67133
[truncated: 2,601 more rows]
