# Supplementary material for: The Ryerson Audio-Visual Database of Emotional Speech and Song (RAVDESS): A dynamic, multimodal set of facial and vocal expressions in North American English
Source: PLoS One. 2018 May 16;13(5):e0196391. doi: 10.1371/journal.pone.0196391 (PMC5955500; doi:10.1371/journal.pone.0196391)
Supplement: S2 Table — Mean scores by actor for proportion correct, unbiased hit rates, intensity, genuineness, response times, goodness, and file duration, separately for speech and song. (XLSX) [file pone.0196391.s005.xlsx]

## Sheet: Speech
Independent Variables	Dependent Variables
Actor	PropCorr	UHR	Intensity(Med)	Intensity(M)	Intensity(SD)	Genuineness(Med)	Genuineness(M)	Genuineness(SD)	Goodness	EmoCategoryRespTime(M, Sec)	EmoCategoryRespTime(SD)	IntensityRespTime(M, Sec)	IntensityRespTime(SD)	GenuinenessRespTime(M, Sec)	GenuinenessRespTime(SD)	FileDuration(Sec)
A1	0.68667	0.50879	3.5333	3.4706	0.95789	3.6361	3.5433	1.0838	5.1485	2.2363	1.4084	1.7731	1.2547	1.0011	0.81216	3.7499
A2	0.78778	0.58434	3.5583	3.51	0.98184	3.5944	3.5039	1.0761	5.7797	2.2041	1.3702	1.7606	1.1829	1.0451	0.8398	3.7877
A3	0.69611	0.52068	3.875	3.7822	0.88656	3.6389	3.4933	1.1406	5.3831	2.3657	1.4396	1.7237	1.1572	1.0023	0.81844	3.7571
A4	0.70833	0.53032	3.8056	3.7539	0.89492	3.6389	3.5139	1.1136	5.4441	2.2763	1.3213	1.7713	1.1945	1.0198	0.81131	3.6303
A5	0.69056	0.5141	3.8028	3.6989	0.95884	3.7	3.5728	1.1172	5.3695	2.2346	1.3653	1.7097	1.2068	1.033	0.83305	3.7354
A6	0.81167	0.60177	3.9222	3.8244	0.88519	3.7611	3.585	1.1298	6.3132	2.1934	1.328	1.709	1.1555	1.0001	0.78236	3.7854
A7	0.77556	0.57665	3.7472	3.6944	0.90556	3.6583	3.5478	1.0874	5.9062	2.1284	1.277	1.7302	1.2126	1.0321	0.84493	3.7493
A8	0.80556	0.5995	3.75	3.6772	0.9525	3.8	3.6844	1.0695	6.2097	2.1856	1.3184	1.7577	1.1808	0.97993	0.79255	3.7265
A9	0.72778	0.53988	3.6778	3.6133	0.96777	3.6639	3.5311	1.1537	5.5021	2.3174	1.4575	1.7246	1.1588	1.0198	0.81541	3.4885
A10	0.71778	0.53371	3.6306	3.5628	0.94906	3.5972	3.5139	1.0726	5.3682	2.2299	1.3541	1.7745	1.2151	1.0131	0.80409	3.7476
A11	0.68278	0.50753	3.5056	3.4528	1.0293	3.6111	3.5006	1.0772	5.0804	2.2906	1.4296	1.6863	1.1547	0.98294	0.76788	3.439
A12	0.765	0.56801	3.7556	3.6844	0.94404	3.6278	3.5522	1.1179	5.8078	2.2648	1.3719	1.7621	1.2388	1.0193	0.82074	3.7532
A13	0.61333	0.45386	3.2806	3.2694	1.0435	3.5194	3.4433	1.065	4.4959	2.2981	1.4299	1.7298	1.188	1.0207	0.78376	3.3283
A14	0.73556	0.54844	3.7	3.625	0.92611	3.6222	3.5139	1.0938	5.5346	2.2241	1.3526	1.7345	1.2029	0.98927	0.81696	3.6792
A15	0.62222	0.45962	3.2278	3.2467	1.0051	3.4194	3.3706	1.0439	4.3993	2.4945	1.5763	1.7511	1.2249	1.0416	0.817	3.4996
A16	0.70389	0.5286	3.7861	3.7122	0.91197	3.7222	3.5944	1.0621	5.4721	2.219	1.3073	1.7223	1.183	0.98799	0.80497	3.7304
A17	0.63111	0.46864	3.4417	3.4239	0.9931	3.3889	3.3217	1.0968	4.5352	2.3559	1.5519	1.7628	1.2008	0.98896	0.8045	3.6698
A18	0.80944	0.60305	3.9222	3.8544	0.89719	3.6111	3.48	1.2135	6.2057	2.1799	1.3401	1.7541	1.1554	1.0233	0.81154	3.7493
A19	0.69278	0.51651	3.8528	3.7756	0.90537	3.7083	3.585	1.1153	5.3859	2.2286	1.3117	1.7156	1.1477	0.96974	0.79302	3.8711
A20	0.72833	0.54245	3.8361	3.745	0.90787	3.7444	3.6128	1.1119	5.6591	2.3019	1.3685	1.7412	1.1686	1.0324	0.84662	3.7259
A21	0.70611	0.52808	3.4333	3.4067	1.0439	3.0694	3.0417	1.2377	4.8417	2.3446	1.4621	1.83	1.2243	1.0266	0.82294	3.9234
A22	0.65778	0.48916	3.1556	3.1244	0.98661	3.1444	3.1217	1.1325	4.4172	2.37	1.5001	1.7351	1.2082	1.01	0.79571	3.7215
A23	0.68278	0.50648	3.425	3.3983	1.0025	3.4	3.3406	1.111	4.8856	2.4225	1.4849	1.7595	1.19	1.0229	0.81701	3.6142
A24	0.73167	0.54418	3.5833	3.5461	0.9762	3.2944	3.235	1.1831	5.2173	2.3105	1.3975	1.7928	1.2267	1.0072	0.81619	3.9534

## Sheet: Song
Independent Variables	Dependent Variables
Actor	PropCorr	UHR	Intensity(Med)	Intensity(M)	Intensity(SD)	Genuineness(Med)	Genuineness(M)	Genuineness(SD)	Goodness	EmoCategoryRespTime(M, Sec)	EmoCategoryRespTime(SD)	IntensityRespTime(M, Sec)	IntensityRespTime(SD)	GenuinenessRespTime(M, Sec)	GenuinenessRespTime(SD)	FileDuration(Sec)
A1	0.71591	0.52793	3.6364	3.5955	0.95216	3.5076	3.4333	1.0793	5.4552	2.0643	1.2829	1.6842	1.1571	1.0469	0.84402	4.572
A2	0.73106	0.54225	3.6136	3.6008	0.92454	3.6023	3.5606	1.0345	5.5466	2.0309	1.2938	1.744	1.2161	1.0713	0.85599	5.0065
A3	0.64015	0.47837	3.9811	3.8508	0.85884	3.5455	3.4598	1.1191	5.0541	2.177	1.2961	1.6665	1.1605	1.0651	0.81158	4.5872
A4	0.75606	0.56409	3.5871	3.572	0.96629	3.5265	3.4197	1.0992	5.6435	2.2073	1.398	1.737	1.2011	1.0268	0.78373	4.3597
A5	0.70076	0.51817	3.6667	3.5932	0.96505	3.5341	3.4553	1.1104	5.2973	2.1589	1.2783	1.7309	1.2534	1.0489	0.79633	4.7904
A6	0.71894	0.53201	3.6894	3.6439	0.88895	3.6326	3.5485	1.0616	5.4861	2.07	1.2435	1.7522	1.2947	1.0695	0.8945	4.7017
A7	0.79091	0.58234	3.6477	3.5841	0.96211	3.4583	3.3712	1.1248	5.8395	2.0556	1.3157	1.7349	1.2237	1.0733	0.83657	4.5508
A8	0.79545	0.5915	3.7803	3.7273	0.89647	3.6477	3.547	1.1335	6.1046	1.9455	1.1995	1.71	1.1481	1.0374	0.82955	4.7494
A9	0.73106	0.54465	3.6553	3.5629	0.94129	3.4205	3.328	1.1359	5.4314	2.1214	1.3223	1.7896	1.3142	1.0502	0.81829	4.6001
A10	0.64318	0.47515	3.7955	3.6841	0.91377	3.6098	3.5568	1.0354	4.9904	2.0504	1.2684	1.6979	1.2128	1.0519	0.83553	4.9003
A11	0.68485	0.50561	3.2197	3.2038	1.0028	3.3977	3.3636	1.0508	4.8386	2.1472	1.3781	1.6623	1.2247	1.0454	0.81688	4.3574
A12	0.72576	0.54329	3.8295	3.7205	0.87741	3.6061	3.4682	1.1166	5.5458	2.1549	1.2977	1.7093	1.2047	1.0615	0.84215	4.4772
A13	0.67197	0.49782	3.3068	3.2652	1.0315	3.4091	3.3561	1.0694	4.8283	2.1137	1.3935	1.7585	1.2731	1.0446	0.82044	4.4605
A14	0.73788	0.55399	3.7311	3.6614	0.89044	3.5265	3.4492	1.0929	5.6587	2.1416	1.3058	1.701	1.1834	1.0438	0.82025	4.3308
A15	0.74924	0.55158	3.25	3.2727	1.0115	3.3447	3.328	1.0866	5.2767	2.0598	1.3358	1.7284	1.2231	1.0693	0.85114	4.2634
A16	0.74318	0.55621	3.6439	3.6	0.92552	3.6591	3.5735	0.99405	5.703	2.0296	1.2254	1.7314	1.2422	0.97788	0.76625	4.7434
A17	0.68636	0.50725	3.3636	3.3311	0.97891	3.2727	3.275	1.0763	4.8645	2.1128	1.3185	1.7217	1.2065	1.0452	0.82944	4.9625
A19	0.70076	0.51707	3.6174	3.5667	0.95578	3.5	3.4371	1.0927	5.2428	2.0801	1.2775	1.7036	1.1809	1.1029	0.85992	4.6198
A20	0.72045	0.53442	3.8864	3.7879	0.9097	3.6402	3.5295	1.1166	5.6209	2.1058	1.3125	1.6884	1.1913	1.0435	0.84713	4.8268
A21	0.74394	0.54486	3.25	3.2462	1.0483	2.9886	2.9902	1.1345	4.9756	2.1471	1.3626	1.7892	1.2035	1.0408	0.77012	4.5879
A22	0.64545	0.47515	3.1591	3.1545	1.0138	3.1061	3.0886	1.0678	4.3593	2.2609	1.4046	1.7172	1.2316	1.0793	0.84916	4.9421
A23	0.70379	0.52948	3.3788	3.3432	1.0244	3.1364	3.0848	1.1681	4.9069	2.1275	1.3626	1.7928	1.2769	1.0112	0.78346	4.7616
A24	0.69167	0.5133	3.5417	3.4455	0.95841	3.0114	3.0091	1.2062	4.7773	2.2885	1.4039	1.6883	1.1792	1.0302	0.7573	4.7805
