# Supplementary material for: The Ryerson Audio-Visual Database of Emotional Speech and Song (RAVDESS): A dynamic, multimodal set of facial and vocal expressions in North American English
Source: PLoS One. 2018 May 16;13(5):e0196391. doi: 10.1371/journal.pone.0196391 (PMC5955500; doi:10.1371/journal.pone.0196391)
Supplement: S3 Table — Confusion matrices showing the average proportion of target and non-target labels selected by raters for each intended emotional expression, for speech and song. (XLSX) [file pone.0196391.s006.xlsx]

## Sheet: Speech
		Actor intended emotion
		Neutral	Calm	Happy	Sad	Angry	Fearful	Disgust	Surprise
Rater chosen emotion	Neutral/Calm	86.6	69.9	14.25	17.12	4.03	4.5	4.36	7.03
	Happy	0.63	17.27	68.44	1.48	0.23	0.59	0.59	6.56
	Sad	4.65	6.06	2.29	60.85	1.02	6.58	8.65	0.76
	Angry	3.82	1.02	1.79	2.9	81.32	4.79	6.48	2.78
	Fearful	0.63	0.66	1.67	9.64	1.39	70.71	2.31	2.22
	Disgust	1.15	1.46	0.78	3.09	8.37	1.81	69.77	3.28
	Surprise	0.28	0.33	7.88	0.69	1.2	7.76	4.13	72.29
	None	2.26	3.3	2.9	4.24	2.45	3.26	3.72	5.07

## Sheet: Song
		Actor intended emotion
		Neutral	Calm	Happy	Sad	Angry	Fearful
Rater chosen emotion	Neutral/Calm	77.75	62.9	15	17.7	6.14	8.06
	Happy	3.7	21.23	74.62	1.87	1.2	0.92
	Sad	12.14	12.01	2.86	67.83	2.3	16.61
	Angry	2.57	0.71	2.21	1.72	83.48	5.72
	Fearful	1.88	1.47	2.86	8.82	3.99	65.16
	None	1.96	1.68	2.45	2.07	2.9	3.51
