# Supplementary material for: The Ryerson Audio-Visual Database of Emotional Speech and Song (RAVDESS): A dynamic, multimodal set of facial and vocal expressions in North American English
Source: PLoS One. 2018 May 16;13(5):e0196391. doi: 10.1371/journal.pone.0196391 (PMC5955500; doi:10.1371/journal.pone.0196391)
Supplement: S4 Table — Raw response data from the test-retest reliability task for all 7356 stimuli. Includes rater identified emotional category (neutral 1, calm 2, happy 3, sad 4, angry 5, fearful 6, surprise 7, disgust 8, none 9), and coded raw accuracy (incorrect 0, correct 1), for presentations at Time 1 and Time 2. (XLSX) [file pone.0196391.s007.xlsx]

## Sheet: Spech
	Independent Variables							Dependent Variables
Filename	Modality	Channel	Emotion	Intensity	Statement	Repetition	Actor	Category Time1	Category Time2	Correct Time1	Correct Time2
01-01-01-01-01-01-01.mp4	AV	Speech	Neutral	Normal	Kids	R1	A1	1	1	1	1
01-01-01-01-01-01-02.mp4	AV	Speech	Neutral	Normal	Kids	R1	A2	1	1	1	1
01-01-01-01-01-01-03.mp4	AV	Speech	Neutral	Normal	Kids	R1	A3	4	4	0	0
01-01-01-01-01-01-04.mp4	AV	Speech	Neutral	Normal	Kids	R1	A4	1	1	1	1
01-01-01-01-01-01-05.mp4	AV	Speech	Neutral	Normal	Kids	R1	A5	1	2	1	1
01-01-01-01-01-01-06.mp4	AV	Speech	Neutral	Normal	Kids	R1	A6	1	1	1	1
01-01-01-01-01-01-07.mp4	AV	Speech	Neutral	Normal	Kids	R1	A7	1	1	1	1
01-01-01-01-01-01-08.mp4	AV	Speech	Neutral	Normal	Kids	R1	A8	1	2	1	1
01-01-01-01-01-01-09.mp4	AV	Speech	Neutral	Normal	Kids	R1	A9	1	5	1	0
01-01-01-01-01-01-10.mp4	AV	Speech	Neutral	Normal	Kids	R1	A10	1	1	1	1
01-01-01-01-01-01-11.mp4	AV	Speech	Neutral	Normal	Kids	R1	A11	1	2	1	1
01-01-01-01-01-01-12.mp4	AV	Speech	Neutral	Normal	Kids	R1	A12	2	2	1	1
01-01-01-01-01-01-13.mp4	AV	Speech	Neutral	Normal	Kids	R1	A13	1	2	1	1
01-01-01-01-01-01-14.mp4	AV	Speech	Neutral	Normal	Kids	R1	A14	2	1	1	1
01-01-01-01-01-01-15.mp4	AV	Speech	Neutral	Normal	Kids	R1	A15	1	1	1	1
01-01-01-01-01-01-16.mp4	AV	Speech	Neutral	Normal	Kids	R1	A16	1	1	1	1
01-01-01-01-01-01-17.mp4	AV	Speech	Neutral	Normal	Kids	R1	A17	1	1	1	1
01-01-01-01-01-01-18.mp4	AV	Speech	Neutral	Normal	Kids	R1	A18	1	1	1	1
01-01-01-01-01-01-19.mp4	AV	Speech	Neutral	Normal	Kids	R1	A19	1	1	1	1
01-01-01-01-01-01-20.mp4	AV	Speech	Neutral	Normal	Kids	R1	A20	1	1	1	1
01-01-01-01-01-01-21.mp4	AV	Speech	Neutral	Normal	Kids	R1	A21	1	1	1	1
01-01-01-01-01-01-22.mp4	AV	Speech	Neutral	Normal	Kids	R1	A22	7	1	0	1
01-01-01-01-01-01-23.mp4	AV	Speech	Neutral	Normal	Kids	R1	A23	1	1	1	1
01-01-01-01-01-01-24.mp4	AV	Speech	Neutral	Normal	Kids	R1	A24	1	1	1	1
01-01-01-01-01-02-01.mp4	AV	Speech	Neutral	Normal	Kids	R2	A1	1	1	1	1
01-01-01-01-01-02-02.mp4	AV	Speech	Neutral	Normal	Kids	R2	A2	1	1	1	1
01-01-01-01-01-02-03.mp4	AV	Speech	Neutral	Normal	Kids	R2	A3	1	1	1	1
01-01-01-01-01-02-04.mp4	AV	Speech	Neutral	Normal	Kids	R2	A4	1	1	1	1
01-01-01-01-01-02-05.mp4	AV	Speech	Neutral	Normal	Kids	R2	A5	2	1	1	1
01-01-01-01-01-02-06.mp4	AV	Speech	Neutral	Normal	Kids	R2	A6	1	1	1	1
01-01-01-01-01-02-07.mp4	AV	Speech	Neutral	Normal	Kids	R2	A7	1	1	1	1
01-01-01-01-01-02-08.mp4	AV	Speech	Neutral	Normal	Kids	R2	A8	2	2	1	1
01-01-01-01-01-02-09.mp4	AV	Speech	Neutral	Normal	Kids	R2	A9	4	5	0	0
01-01-01-01-01-02-10.mp4	AV	Speech	Neutral	Normal	Kids	R2	A10	2	5	1	0
01-01-01-01-01-02-11.mp4	AV	Speech	Neutral	Normal	Kids	R2	A11	1	1	1	1
01-01-01-01-01-02-12.mp4	AV	Speech	Neutral	Normal	Kids	R2	A12	1	2	1	1
01-01-01-01-01-02-13.mp4	AV	Speech	Neutral	Normal	Kids	R2	A13	1	1	1	1
01-01-01-01-01-02-14.mp4	AV	Speech	Neutral	Normal	Kids	R2	A14	1	1	1	1
01-01-01-01-01-02-15.mp4	AV	Speech	Neutral	Normal	Kids	R2	A15	1	1	1	1
01-01-01-01-01-02-16.mp4	AV	Speech	Neutral	Normal	Kids	R2	A16	5	5	0	0
01-01-01-01-01-02-17.mp4	AV	Speech	Neutral	Normal	Kids	R2	A17	1	1	1	1
01-01-01-01-01-02-18.mp4	AV	Speech	Neutral	Normal	Kids	R2	A18	1	1	1	1
01-01-01-01-01-02-19.mp4	AV	Speech	Neutral	Normal	Kids	R2	A19	2	1	1	1
01-01-01-01-01-02-20.mp4	AV	Speech	Neutral	Normal	Kids	R2	A20	1	1	1	1
01-01-01-01-01-02-21.mp4	AV	Speech	Neutral	Normal	Kids	R2	A21	1	1	1	1
01-01-01-01-01-02-22.mp4	AV	Speech	Neutral	Normal	Kids	R2	A22	2	1	1	1
01-01-01-01-01-02-23.mp4	AV	Speech	Neutral	Normal	Kids	R2	A23	1	1	1	1
01-01-01-01-01-02-24.mp4	AV	Speech	Neutral	Normal	Kids	R2	A24	1	1	1	1
01-01-01-01-02-01-01.mp4	AV	Speech	Neutral	Normal	Dogs	R1	A1	1	2	1	1
01-01-01-01-02-01-02.mp4	AV	Speech	Neutral	Normal	Dogs	R1	A2	1	1	1	1
01-01-01-01-02-01-03.mp4	AV	Speech	Neutral	Normal	Dogs	R1	A3	1	2	1	1
01-01-01-01-02-01-04.mp4	AV	Speech	Neutral	Normal	Dogs	R1	A4	2	1	1	1
01-01-01-01-02-01-05.mp4	AV	Speech	Neutral	Normal	Dogs	R1	A5	1	1	1	1
01-01-01-01-02-01-06.mp4	AV	Speech	Neutral	Normal	Dogs	R1	A6	1	1	1	1
01-01-01-01-02-01-07.mp4	AV	Speech	Neutral	Normal	Dogs	R1	A7	1	1	1	1
01-01-01-01-02-01-08.mp4	AV	Speech	Neutral	Normal	Dogs	R1	A8	2	1	1	1
01-01-01-01-02-01-09.mp4	AV	Speech	Neutral	Normal	Dogs	R1	A9	1	1	1	1
01-01-01-01-02-01-10.mp4	AV	Speech	Neutral	Normal	Dogs	R1	A10	2	1	1	1
01-01-01-01-02-01-11.mp4	AV	Speech	Neutral	Normal	Dogs	R1	A11	2	2	1	1
01-01-01-01-02-01-12.mp4	AV	Speech	Neutral	Normal	Dogs	R1	A12	1	1	1	1
01-01-01-01-02-01-13.mp4	AV	Speech	Neutral	Normal	Dogs	R1	A13	1	1	1	1
01-01-01-01-02-01-14.mp4	AV	Speech	Neutral	Normal	Dogs	R1	A14	1	1	1	1
01-01-01-01-02-01-15.mp4	AV	Speech	Neutral	Normal	Dogs	R1	A15	1	1	1	1
01-01-01-01-02-01-16.mp4	AV	Speech	Neutral	Normal	Dogs	R1	A16	1	1	1	1
01-01-01-01-02-01-17.mp4	AV	Speech	Neutral	Normal	Dogs	R1	A17	1	1	1	1
01-01-01-01-02-01-18.mp4	AV	Speech	Neutral	Normal	Dogs	R1	A18	1	1	1	1
01-01-01-01-02-01-19.mp4	AV	Speech	Neutral	Normal	Dogs	R1	A19	2	4	1	0
01-01-01-01-02-01-20.mp4	AV	Speech	Neutral	Normal	Dogs	R1	A20	2	2	1	1
01-01-01-01-02-01-21.mp4	AV	Speech	Neutral	Normal	Dogs	R1	A21	1	1	1	1
01-01-01-01-02-01-22.mp4	AV	Speech	Neutral	Normal	Dogs	R1	A22	2	2	1	1
01-01-01-01-02-01-23.mp4	AV	Speech	Neutral	Normal	Dogs	R1	A23	1	1	1	1
01-01-01-01-02-01-24.mp4	AV	Speech	Neutral	Normal	Dogs	R1	A24	1	1	1	1
01-01-01-01-02-02-01.mp4	AV	Speech	Neutral	Normal	Dogs	R2	A1	1	1	1	1
01-01-01-01-02-02-02.mp4	AV	Speech	Neutral	Normal	Dogs	R2	A2	1	1	1	1
01-01-01-01-02-02-03.mp4	AV	Speech	Neutral	Normal	Dogs	R2	A3	1	1	1	1
01-01-01-01-02-02-04.mp4	AV	Speech	Neutral	Normal	Dogs	R2	A4	1	1	1	1
01-01-01-01-02-02-05.mp4	AV	Speech	Neutral	Normal	Dogs	R2	A5	1	1	1	1
01-01-01-01-02-02-06.mp4	AV	Speech	Neutral	Normal	Dogs	R2	A6	4	1	0	1
01-01-01-01-02-02-07.mp4	AV	Speech	Neutral	Normal	Dogs	R2	A7	1	1	1	1
01-01-01-01-02-02-08.mp4	AV	Speech	Neutral	Normal	Dogs	R2	A8	5	1	0	1
01-01-01-01-02-02-09.mp4	AV	Speech	Neutral	Normal	Dogs	R2	A9	1	1	1	1
01-01-01-01-02-02-10.mp4	AV	Speech	Neutral	Normal	Dogs	R2	A10	2	2	1	1
01-01-01-01-02-02-11.mp4	AV	Speech	Neutral	Normal	Dogs	R2	A11	1	1	1	1
01-01-01-01-02-02-12.mp4	AV	Speech	Neutral	Normal	Dogs	R2	A12	2	2	1	1
01-01-01-01-02-02-13.mp4	AV	Speech	Neutral	Normal	Dogs	R2	A13	1	1	1	1
01-01-01-01-02-02-14.mp4	AV	Speech	Neutral	Normal	Dogs	R2	A14	7	2	0	1
01-01-01-01-02-02-15.mp4	AV	Speech	Neutral	Normal	Dogs	R2	A15	1	1	1	1
01-01-01-01-02-02-16.mp4	AV	Speech	Neutral	Normal	Dogs	R2	A16	1	1	1	1
01-01-01-01-02-02-17.mp4	AV	Speech	Neutral	Normal	Dogs	R2	A17	1	4	1	0
01-01-01-01-02-02-18.mp4	AV	Speech	Neutral	Normal	Dogs	R2	A18	1	1	1	1
01-01-01-01-02-02-19.mp4	AV	Speech	Neutral	Normal	Dogs	R2	A19	1	1	1	1
01-01-01-01-02-02-20.mp4	AV	Speech	Neutral	Normal	Dogs	R2	A20	1	1	1	1
01-01-01-01-02-02-21.mp4	AV	Speech	Neutral	Normal	Dogs	R2	A21	5	5	0	0
01-01-01-01-02-02-22.mp4	AV	Speech	Neutral	Normal	Dogs	R2	A22	1	1	1	1
01-01-01-01-02-02-23.mp4	AV	Speech	Neutral	Normal	Dogs	R2	A23	1	1	1	1
01-01-01-01-02-02-24.mp4	AV	Speech	Neutral	Normal	Dogs	R2	A24	1	1	1	1
01-01-02-01-01-01-01.mp4	AV	Speech	Calm	Normal	Kids	R1	A1	1	1	1	1
01-01-02-01-01-01-02.mp4	AV	Speech	Calm	Normal	Kids	R1	A2	2	1	1	1
01-01-02-01-01-01-03.mp4	AV	Speech	Calm	Normal	Kids	R1	A3	3	3	0	0
01-01-02-01-01-01-04.mp4	AV	Speech	Calm	Normal	Kids	R1	A4	3	3	0	0
01-01-02-01-01-01-05.mp4	AV	Speech	Calm	Normal	Kids	R1	A5	3	3	0	0
01-01-02-01-01-01-06.mp4	AV	Speech	Calm	Normal	Kids	R1	A6	1	2	1	1
01-01-02-01-01-01-07.mp4	AV	Speech	Calm	Normal	Kids	R1	A7	1	3	1	0
01-01-02-01-01-01-08.mp4	AV	Speech	Calm	Normal	Kids	R1	A8	2	2	1	1
01-01-02-01-01-01-09.mp4	AV	Speech	Calm	Normal	Kids	R1	A9	2	2	1	1
01-01-02-01-01-01-10.mp4	AV	Speech	Calm	Normal	Kids	R1	A10	3	3	0	0
01-01-02-01-01-01-11.mp4	AV	Speech	Calm	Normal	Kids	R1	A11	2	2	1	1
01-01-02-01-01-01-12.mp4	AV	Speech	Calm	Normal	Kids	R1	A12	2	2	1	1
01-01-02-01-01-01-13.mp4	AV	Speech	Calm	Normal	Kids	R1	A13	2	1	1	1
01-01-02-01-01-01-14.mp4	AV	Speech	Calm	Normal	Kids	R1	A14	3	3	0	0
01-01-02-01-01-01-15.mp4	AV	Speech	Calm	Normal	Kids	R1	A15	2	2	1	1
01-01-02-01-01-01-16.mp4	AV	Speech	Calm	Normal	Kids	R1	A16	1	2	1	1
01-01-02-01-01-01-17.mp4	AV	Speech	Calm	Normal	Kids	R1	A17	3	3	0	0
01-01-02-01-01-01-18.mp4	AV	Speech	Calm	Normal	Kids	R1	A18	3	2	0	1
01-01-02-01-01-01-19.mp4	AV	Speech	Calm	Normal	Kids	R1	A19	2	3	1	0
01-01-02-01-01-01-20.mp4	AV	Speech	Calm	Normal	Kids	R1	A20	2	2	1	1
01-01-02-01-01-01-21.mp4	AV	Speech	Calm	Normal	Kids	R1	A21	2	2	1	1
01-01-02-01-01-01-22.mp4	AV	Speech	Calm	Normal	Kids	R1	A22	2	2	1	1
01-01-02-01-01-01-23.mp4	AV	Speech	Calm	Normal	Kids	R1	A23	2	2	1	1
01-01-02-01-01-01-24.mp4	AV	Speech	Calm	Normal	Kids	R1	A24	2	2	1	1
01-01-02-01-01-02-01.mp4	AV	Speech	Calm	Normal	Kids	R2	A1	1	2	1	1
01-01-02-01-01-02-02.mp4	AV	Speech	Calm	Normal	Kids	R2	A2	1	1	1	1
01-01-02-01-01-02-03.mp4	AV	Speech	Calm	Normal	Kids	R2	A3	4	4	0	0
01-01-02-01-01-02-04.mp4	AV	Speech	Calm	Normal	Kids	R2	A4	3	3	0	0
01-01-02-01-01-02-05.mp4	AV	Speech	Calm	Normal	Kids	R2	A5	3	2	0	1
01-01-02-01-01-02-06.mp4	AV	Speech	Calm	Normal	Kids	R2	A6	2	2	1	1
01-01-02-01-01-02-07.mp4	AV	Speech	Calm	Normal	Kids	R2	A7	2	3	1	0
01-01-02-01-01-02-08.mp4	AV	Speech	Calm	Normal	Kids	R2	A8	2	2	1	1
01-01-02-01-01-02-09.mp4	AV	Speech	Calm	Normal	Kids	R2	A9	2	2	1	1
01-01-02-01-01-02-10.mp4	AV	Speech	Calm	Normal	Kids	R2	A10	2	2	1	1
01-01-02-01-01-02-11.mp4	AV	Speech	Calm	Normal	Kids	R2	A11	3	2	0	1
01-01-02-01-01-02-12.mp4	AV	Speech	Calm	Normal	Kids	R2	A12	1	6	1	0
01-01-02-01-01-02-13.mp4	AV	Speech	Calm	Normal	Kids	R2	A13	1	2	1	1
01-01-02-01-01-02-14.mp4	AV	Speech	Calm	Normal	Kids	R2	A14	2	2	1	1
01-01-02-01-01-02-15.mp4	AV	Speech	Calm	Normal	Kids	R2	A15	2	2	1	1
01-01-02-01-01-02-16.mp4	AV	Speech	Calm	Normal	Kids	R2	A16	1	2	1	1
01-01-02-01-01-02-17.mp4	AV	Speech	Calm	Normal	Kids	R2	A17	5	5	0	0
01-01-02-01-01-02-18.mp4	AV	Speech	Calm	Normal	Kids	R2	A18	2	3	1	0
01-01-02-01-01-02-19.mp4	AV	Speech	Calm	Normal	Kids	R2	A19	3	3	0	0
01-01-02-01-01-02-20.mp4	AV	Speech	Calm	Normal	Kids	R2	A20	2	2	1	1
01-01-02-01-01-02-21.mp4	AV	Speech	Calm	Normal	Kids	R2	A21	9	1	0	1
01-01-02-01-01-02-22.mp4	AV	Speech	Calm	Normal	Kids	R2	A22	2	1	1	1
01-01-02-01-01-02-23.mp4	AV	Speech	Calm	Normal	Kids	R2	A23	2	2	1	1
01-01-02-01-01-02-24.mp4	AV	Speech	Calm	Normal	Kids	R2	A24	2	2	1	1
01-01-02-01-02-01-01.mp4	AV	Speech	Calm	Normal	Dogs	R1	A1	2	3	1	0
01-01-02-01-02-01-02.mp4	AV	Speech	Calm	Normal	Dogs	R1	A2	2	2	1	1
01-01-02-01-02-01-03.mp4	AV	Speech	Calm	Normal	Dogs	R1	A3	2	2	1	1
01-01-02-01-02-01-04.mp4	AV	Speech	Calm	Normal	Dogs	R1	A4	3	3	0	0
01-01-02-01-02-01-05.mp4	AV	Speech	Calm	Normal	Dogs	R1	A5	3	2	0	1
01-01-02-01-02-01-06.mp4	AV	Speech	Calm	Normal	Dogs	R1	A6	2	2	1	1
01-01-02-01-02-01-07.mp4	AV	Speech	Calm	Normal	Dogs	R1	A7	3	3	0	0
01-01-02-01-02-01-08.mp4	AV	Speech	Calm	Normal	Dogs	R1	A8	3	3	0	0
01-01-02-01-02-01-09.mp4	AV	Speech	Calm	Normal	Dogs	R1	A9	2	1	1	1
01-01-02-01-02-01-10.mp4	AV	Speech	Calm	Normal	Dogs	R1	A10	2	2	1	1
01-01-02-01-02-01-11.mp4	AV	Speech	Calm	Normal	Dogs	R1	A11	2	2	1	1
01-01-02-01-02-01-12.mp4	AV	Speech	Calm	Normal	Dogs	R1	A12	3	2	0	1
01-01-02-01-02-01-13.mp4	AV	Speech	Calm	Normal	Dogs	R1	A13	4	7	0	0
01-01-02-01-02-01-14.mp4	AV	Speech	Calm	Normal	Dogs	R1	A14	2	2	1	1
01-01-02-01-02-01-15.mp4	AV	Speech	Calm	Normal	Dogs	R1	A15	2	2	1	1
01-01-02-01-02-01-16.mp4	AV	Speech	Calm	Normal	Dogs	R1	A16	3	3	0	0
01-01-02-01-02-01-17.mp4	AV	Speech	Calm	Normal	Dogs	R1	A17	2	1	1	1
01-01-02-01-02-01-18.mp4	AV	Speech	Calm	Normal	Dogs	R1	A18	4	4	0	0
01-01-02-01-02-01-19.mp4	AV	Speech	Calm	Normal	Dogs	R1	A19	2	2	1	1
01-01-02-01-02-01-20.mp4	AV	Speech	Calm	Normal	Dogs	R1	A20	2	9	1	0
01-01-02-01-02-01-21.mp4	AV	Speech	Calm	Normal	Dogs	R1	A21	1	1	1	1
01-01-02-01-02-01-22.mp4	AV	Speech	Calm	Normal	Dogs	R1	A22	1	1	1	1
01-01-02-01-02-01-23.mp4	AV	Speech	Calm	Normal	Dogs	R1	A23	2	2	1	1
01-01-02-01-02-01-24.mp4	AV	Speech	Calm	Normal	Dogs	R1	A24	1	1	1	1
01-01-02-01-02-02-01.mp4	AV	Speech	Calm	Normal	Dogs	R2	A1	2	2	1	1
01-01-02-01-02-02-02.mp4	AV	Speech	Calm	Normal	Dogs	R2	A2	1	2	1	1
01-01-02-01-02-02-03.mp4	AV	Speech	Calm	Normal	Dogs	R2	A3	3	4	0	0
01-01-02-01-02-02-04.mp4	AV	Speech	Calm	Normal	Dogs	R2	A4	3	2	0	1
01-01-02-01-02-02-05.mp4	AV	Speech	Calm	Normal	Dogs	R2	A5	2	2	1	1
01-01-02-01-02-02-06.mp4	AV	Speech	Calm	Normal	Dogs	R2	A6	2	2	1	1
01-01-02-01-02-02-07.mp4	AV	Speech	Calm	Normal	Dogs	R2	A7	9	2	0	1
01-01-02-01-02-02-08.mp4	AV	Speech	Calm	Normal	Dogs	R2	A8	3	2	0	1
01-01-02-01-02-02-09.mp4	AV	Speech	Calm	Normal	Dogs	R2	A9	1	1	1	1
01-01-02-01-02-02-10.mp4	AV	Speech	Calm	Normal	Dogs	R2	A10	1	2	1	1
01-01-02-01-02-02-11.mp4	AV	Speech	Calm	Normal	Dogs	R2	A11	1	2	1	1
01-01-02-01-02-02-12.mp4	AV	Speech	Calm	Normal	Dogs	R2	A12	3	2	0	1
01-01-02-01-02-02-13.mp4	AV	Speech	Calm	Normal	Dogs	R2	A13	9	9	0	0
01-01-02-01-02-02-14.mp4	AV	Speech	Calm	Normal	Dogs	R2	A14	2	2	1	1
01-01-02-01-02-02-15.mp4	AV	Speech	Calm	Normal	Dogs	R2	A15	2	2	1	1
01-01-02-01-02-02-16.mp4	AV	Speech	Calm	Normal	Dogs	R2	A16	2	5	1	0
01-01-02-01-02-02-17.mp4	AV	Speech	Calm	Normal	Dogs	R2	A17	1	1	1	1
01-01-02-01-02-02-18.mp4	AV	Speech	Calm	Normal	Dogs	R2	A18	2	2	1	1
01-01-02-01-02-02-19.mp4	AV	Speech	Calm	Normal	Dogs	R2	A19	3	3	0	0
01-01-02-01-02-02-20.mp4	AV	Speech	Calm	Normal	Dogs	R2	A20	2	2	1	1
01-01-02-01-02-02-21.mp4	AV	Speech	Calm	Normal	Dogs	R2	A21	4	2	0	1
01-01-02-01-02-02-22.mp4	AV	Speech	Calm	Normal	Dogs	R2	A22	2	2	1	1
01-01-02-01-02-02-23.mp4	AV	Speech	Calm	Normal	Dogs	R2	A23	2	2	1	1
01-01-02-01-02-02-24.mp4	AV	Speech	Calm	Normal	Dogs	R2	A24	1	2	1	1
01-01-02-02-01-01-01.mp4	AV	Speech	Calm	Strong	Kids	R1	A1	2	2	1	1
01-01-02-02-01-01-02.mp4	AV	Speech	Calm	Strong	Kids	R1	A2	2	2	1	1
01-01-02-02-01-01-03.mp4	AV	Speech	Calm	Strong	Kids	R1	A3	7	7	0	0
01-01-02-02-01-01-04.mp4	AV	Speech	Calm	Strong	Kids	R1	A4	2	2	1	1
01-01-02-02-01-01-05.mp4	AV	Speech	Calm	Strong	Kids	R1	A5	3	3	0	0
01-01-02-02-01-01-06.mp4	AV	Speech	Calm	Strong	Kids	R1	A6	2	2	1	1
01-01-02-02-01-01-07.mp4	AV	Speech	Calm	Strong	Kids	R1	A7	2	3	1	0
01-01-02-02-01-01-08.mp4	AV	Speech	Calm	Strong	Kids	R1	A8	3	3	0	0
01-01-02-02-01-01-09.mp4	AV	Speech	Calm	Strong	Kids	R1	A9	2	2	1	1
01-01-02-02-01-01-10.mp4	AV	Speech	Calm	Strong	Kids	R1	A10	2	2	1	1
01-01-02-02-01-01-11.mp4	AV	Speech	Calm	Strong	Kids	R1	A11	2	2	1	1
01-01-02-02-01-01-12.mp4	AV	Speech	Calm	Strong	Kids	R1	A12	2	2	1	1
01-01-02-02-01-01-13.mp4	AV	Speech	Calm	Strong	Kids	R1	A13	2	2	1	1
01-01-02-02-01-01-14.mp4	AV	Speech	Calm	Strong	Kids	R1	A14	2	2	1	1
01-01-02-02-01-01-15.mp4	AV	Speech	Calm	Strong	Kids	R1	A15	2	2	1	1
01-01-02-02-01-01-16.mp4	AV	Speech	Calm	Strong	Kids	R1	A16	2	2	1	1
01-01-02-02-01-01-17.mp4	AV	Speech	Calm	Strong	Kids	R1	A17	2	8	1	0
01-01-02-02-01-01-18.mp4	AV	Speech	Calm	Strong	Kids	R1	A18	4	1	0	1
01-01-02-02-01-01-19.mp4	AV	Speech	Calm	Strong	Kids	R1	A19	3	3	0	0
01-01-02-02-01-01-20.mp4	AV	Speech	Calm	Strong	Kids	R1	A20	3	2	0	1
01-01-02-02-01-01-21.mp4	AV	Speech	Calm	Strong	Kids	R1	A21	1	2	1	1
01-01-02-02-01-01-22.mp4	AV	Speech	Calm	Strong	Kids	R1	A22	2	2	1	1
01-01-02-02-01-01-23.mp4	AV	Speech	Calm	Strong	Kids	R1	A23	2	2	1	1
01-01-02-02-01-01-24.mp4	AV	Speech	Calm	Strong	Kids	R1	A24	2	3	1	0
01-01-02-02-01-02-01.mp4	AV	Speech	Calm	Strong	Kids	R2	A1	2	2	1	1
01-01-02-02-01-02-02.mp4	AV	Speech	Calm	Strong	Kids	R2	A2	2	2	1	1
01-01-02-02-01-02-03.mp4	AV	Speech	Calm	Strong	Kids	R2	A3	1	2	1	1
01-01-02-02-01-02-04.mp4	AV	Speech	Calm	Strong	Kids	R2	A4	9	9	0	0
01-01-02-02-01-02-05.mp4	AV	Speech	Calm	Strong	Kids	R2	A5	2	2	1	1
01-01-02-02-01-02-06.mp4	AV	Speech	Calm	Strong	Kids	R2	A6	2	2	1	1
01-01-02-02-01-02-07.mp4	AV	Speech	Calm	Strong	Kids	R2	A7	2	2	1	1
01-01-02-02-01-02-08.mp4	AV	Speech	Calm	Strong	Kids	R2	A8	2	2	1	1
01-01-02-02-01-02-09.mp4	AV	Speech	Calm	Strong	Kids	R2	A9	9	9	0	0
01-01-02-02-01-02-10.mp4	AV	Speech	Calm	Strong	Kids	R2	A10	2	5	1	0
01-01-02-02-01-02-11.mp4	AV	Speech	Calm	Strong	Kids	R2	A11	2	2	1	1
01-01-02-02-01-02-12.mp4	AV	Speech	Calm	Strong	Kids	R2	A12	2	2	1	1
01-01-02-02-01-02-13.mp4	AV	Speech	Calm	Strong	Kids	R2	A13	1	1	1	1
01-01-02-02-01-02-14.mp4	AV	Speech	Calm	Strong	Kids	R2	A14	2	3	1	0
01-01-02-02-01-02-15.mp4	AV	Speech	Calm	Strong	Kids	R2	A15	2	2	1	1
01-01-02-02-01-02-16.mp4	AV	Speech	Calm	Strong	Kids	R2	A16	2	2	1	1
01-01-02-02-01-02-17.mp4	AV	Speech	Calm	Strong	Kids	R2	A17	2	2	1	1
01-01-02-02-01-02-18.mp4	AV	Speech	Calm	Strong	Kids	R2	A18	2	2	1	1
01-01-02-02-01-02-19.mp4	AV	Speech	Calm	Strong	Kids	R2	A19	2	2	1	1
01-01-02-02-01-02-20.mp4	AV	Speech	Calm	Strong	Kids	R2	A20	3	3	0	0
01-01-02-02-01-02-21.mp4	AV	Speech	Calm	Strong	Kids	R2	A21	7	7	0	0
01-01-02-02-01-02-22.mp4	AV	Speech	Calm	Strong	Kids	R2	A22	2	2	1	1
01-01-02-02-01-02-23.mp4	AV	Speech	Calm	Strong	Kids	R2	A23	2	2	1	1
01-01-02-02-01-02-24.mp4	AV	Speech	Calm	Strong	Kids	R2	A24	2	1	1	1
01-01-02-02-02-01-01.mp4	AV	Speech	Calm	Strong	Dogs	R1	A1	3	2	0	1
01-01-02-02-02-01-02.mp4	AV	Speech	Calm	Strong	Dogs	R1	A2	1	2	1	1
01-01-02-02-02-01-03.mp4	AV	Speech	Calm	Strong	Dogs	R1	A3	4	4	0	0
01-01-02-02-02-01-04.mp4	AV	Speech	Calm	Strong	Dogs	R1	A4	3	3	0	0
01-01-02-02-02-01-05.mp4	AV	Speech	Calm	Strong	Dogs	R1	A5	2	2	1	1
01-01-02-02-02-01-06.mp4	AV	Speech	Calm	Strong	Dogs	R1	A6	2	2	1	1
01-01-02-02-02-01-07.mp4	AV	Speech	Calm	Strong	Dogs	R1	A7	3	2	0	1
01-01-02-02-02-01-08.mp4	AV	Speech	Calm	Strong	Dogs	R1	A8	4	2	0	1
01-01-02-02-02-01-09.mp4	AV	Speech	Calm	Strong	Dogs	R1	A9	1	2	1	1
01-01-02-02-02-01-10.mp4	AV	Speech	Calm	Strong	Dogs	R1	A10	2	2	1	1
01-01-02-02-02-01-11.mp4	AV	Speech	Calm	Strong	Dogs	R1	A11	2	2	1	1
01-01-02-02-02-01-12.mp4	AV	Speech	Calm	Strong	Dogs	R1	A12	2	2	1	1
01-01-02-02-02-01-13.mp4	AV	Speech	Calm	Strong	Dogs	R1	A13	2	2	1	1
01-01-02-02-02-01-14.mp4	AV	Speech	Calm	Strong	Dogs	R1	A14	2	3	1	0
01-01-02-02-02-01-15.mp4	AV	Speech	Calm	Strong	Dogs	R1	A15	2	2	1	1
01-01-02-02-02-01-16.mp4	AV	Speech	Calm	Strong	Dogs	R1	A16	3	3	0	0
01-01-02-02-02-01-17.mp4	AV	Speech	Calm	Strong	Dogs	R1	A17	2	1	1	1
01-01-02-02-02-01-18.mp4	AV	Speech	Calm	Strong	Dogs	R1	A18	2	2	1	1
01-01-02-02-02-01-19.mp4	AV	Speech	Calm	Strong	Dogs	R1	A19	2	2	1	1
01-01-02-02-02-01-20.mp4	AV	Speech	Calm	Strong	Dogs	R1	A20	2	2	1	1
01-01-02-02-02-01-21.mp4	AV	Speech	Calm	Strong	Dogs	R1	A21	2	2	1	1
01-01-02-02-02-01-22.mp4	AV	Speech	Calm	Strong	Dogs	R1	A22	2	2	1	1
01-01-02-02-02-01-23.mp4	AV	Speech	Calm	Strong	Dogs	R1	A23	2	2	1	1
01-01-02-02-02-01-24.mp4	AV	Speech	Calm	Strong	Dogs	R1	A24	1	1	1	1
01-01-02-02-02-02-01.mp4	AV	Speech	Calm	Strong	Dogs	R2	A1	2	2	1	1
01-01-02-02-02-02-02.mp4	AV	Speech	Calm	Strong	Dogs	R2	A2	1	1	1	1
01-01-02-02-02-02-03.mp4	AV	Speech	Calm	Strong	Dogs	R2	A3	4	4	0	0
01-01-02-02-02-02-04.mp4	AV	Speech	Calm	Strong	Dogs	R2	A4	2	3	1	0
01-01-02-02-02-02-05.mp4	AV	Speech	Calm	Strong	Dogs	R2	A5	2	2	1	1
01-01-02-02-02-02-06.mp4	AV	Speech	Calm	Strong	Dogs	R2	A6	2	2	1	1
01-01-02-02-02-02-07.mp4	AV	Speech	Calm	Strong	Dogs	R2	A7	1	1	1	1
01-01-02-02-02-02-08.mp4	AV	Speech	Calm	Strong	Dogs	R2	A8	2	3	1	0
01-01-02-02-02-02-09.mp4	AV	Speech	Calm	Strong	Dogs	R2	A9	2	1	1	1
01-01-02-02-02-02-10.mp4	AV	Speech	Calm	Strong	Dogs	R2	A10	2	2	1	1
01-01-02-02-02-02-11.mp4	AV	Speech	Calm	Strong	Dogs	R2	A11	2	2	1	1
01-01-02-02-02-02-12.mp4	AV	Speech	Calm	Strong	Dogs	R2	A12	2	2	1	1
01-01-02-02-02-02-13.mp4	AV	Speech	Calm	Strong	Dogs	R2	A13	1	1	1	1
01-01-02-02-02-02-14.mp4	AV	Speech	Calm	Strong	Dogs	R2	A14	3	3	0	0
01-01-02-02-02-02-15.mp4	AV	Speech	Calm	Strong	Dogs	R2	A15	1	2	1	1
01-01-02-02-02-02-16.mp4	AV	Speech	Calm	Strong	Dogs	R2	A16	3	3	0	0
01-01-02-02-02-02-17.mp4	AV	Speech	Calm	Strong	Dogs	R2	A17	9	1	0	1
01-01-02-02-02-02-18.mp4	AV	Speech	Calm	Strong	Dogs	R2	A18	2	2	1	1
01-01-02-02-02-02-19.mp4	AV	Speech	Calm	Strong	Dogs	R2	A19	2	2	1	1
01-01-02-02-02-02-20.mp4	AV	Speech	Calm	Strong	Dogs	R2	A20	2	2	1	1
01-01-02-02-02-02-21.mp4	AV	Speech	Calm	Strong	Dogs	R2	A21	2	2	1	1
01-01-02-02-02-02-22.mp4	AV	Speech	Calm	Strong	Dogs	R2	A22	2	2	1	1
01-01-02-02-02-02-23.mp4	AV	Speech	Calm	Strong	Dogs	R2	A23	2	2	1	1
01-01-02-02-02-02-24.mp4	AV	Speech	Calm	Strong	Dogs	R2	A24	2	3	1	0
01-01-03-01-01-01-01.mp4	AV	Speech	Happy	Normal	Kids	R1	A1	3	3	1	1
01-01-03-01-01-01-02.mp4	AV	Speech	Happy	Normal	Kids	R1	A2	3	3	1	1
01-01-03-01-01-01-03.mp4	AV	Speech	Happy	Normal	Kids	R1	A3	3	3	1	1
01-01-03-01-01-01-04.mp4	AV	Speech	Happy	Normal	Kids	R1	A4	3	2	1	0
01-01-03-01-01-01-05.mp4	AV	Speech	Happy	Normal	Kids	R1	A5	3	3	1	1
01-01-03-01-01-01-06.mp4	AV	Speech	Happy	Normal	Kids	R1	A6	3	3	1	1
01-01-03-01-01-01-07.mp4	AV	Speech	Happy	Normal	Kids	R1	A7	1	1	0	0
01-01-03-01-01-01-08.mp4	AV	Speech	Happy	Normal	Kids	R1	A8	3	3	1	1
01-01-03-01-01-01-09.mp4	AV	Speech	Happy	Normal	Kids	R1	A9	3	3	1	1
01-01-03-01-01-01-10.mp4	AV	Speech	Happy	Normal	Kids	R1	A10	3	3	1	1
01-01-03-01-01-01-11.mp4	AV	Speech	Happy	Normal	Kids	R1	A11	2	2	0	0
01-01-03-01-01-01-12.mp4	AV	Speech	Happy	Normal	Kids	R1	A12	3	3	1	1
01-01-03-01-01-01-13.mp4	AV	Speech	Happy	Normal	Kids	R1	A13	2	3	0	1
01-01-03-01-01-01-14.mp4	AV	Speech	Happy	Normal	Kids	R1	A14	3	3	1	1
01-01-03-01-01-01-15.mp4	AV	Speech	Happy	Normal	Kids	R1	A15	3	3	1	1
01-01-03-01-01-01-16.mp4	AV	Speech	Happy	Normal	Kids	R1	A16	3	3	1	1
01-01-03-01-01-01-17.mp4	AV	Speech	Happy	Normal	Kids	R1	A17	1	2	0	0
01-01-03-01-01-01-18.mp4	AV	Speech	Happy	Normal	Kids	R1	A18	3	3	1	1
01-01-03-01-01-01-19.mp4	AV	Speech	Happy	Normal	Kids	R1	A19	3	3	1	1
01-01-03-01-01-01-20.mp4	AV	Speech	Happy	Normal	Kids	R1	A20	3	8	1	0
01-01-03-01-01-01-21.mp4	AV	Speech	Happy	Normal	Kids	R1	A21	3	3	1	1
01-01-03-01-01-01-22.mp4	AV	Speech	Happy	Normal	Kids	R1	A22	3	3	1	1
01-01-03-01-01-01-23.mp4	AV	Speech	Happy	Normal	Kids	R1	A23	2	2	0	0
01-01-03-01-01-01-24.mp4	AV	Speech	Happy	Normal	Kids	R1	A24	3	3	1	1
01-01-03-01-01-02-01.mp4	AV	Speech	Happy	Normal	Kids	R2	A1	3	3	1	1
01-01-03-01-01-02-02.mp4	AV	Speech	Happy	Normal	Kids	R2	A2	3	2	1	0
01-01-03-01-01-02-03.mp4	AV	Speech	Happy	Normal	Kids	R2	A3	9	3	0	1
01-01-03-01-01-02-04.mp4	AV	Speech	Happy	Normal	Kids	R2	A4	3	3	1	1
01-01-03-01-01-02-05.mp4	AV	Speech	Happy	Normal	Kids	R2	A5	3	3	1	1
01-01-03-01-01-02-06.mp4	AV	Speech	Happy	Normal	Kids	R2	A6	3	3	1	1
01-01-03-01-01-02-07.mp4	AV	Speech	Happy	Normal	Kids	R2	A7	3	3	1	1
01-01-03-01-01-02-08.mp4	AV	Speech	Happy	Normal	Kids	R2	A8	3	3	1	1
01-01-03-01-01-02-09.mp4	AV	Speech	Happy	Normal	Kids	R2	A9	3	3	1	1
01-01-03-01-01-02-10.mp4	AV	Speech	Happy	Normal	Kids	R2	A10	3	8	1	0
01-01-03-01-01-02-11.mp4	AV	Speech	Happy	Normal	Kids	R2	A11	3	3	1	1
01-01-03-01-01-02-12.mp4	AV	Speech	Happy	Normal	Kids	R2	A12	3	2	1	0
01-01-03-01-01-02-13.mp4	AV	Speech	Happy	Normal	Kids	R2	A13	3	3	1	1
01-01-03-01-01-02-14.mp4	AV	Speech	Happy	Normal	Kids	R2	A14	3	3	1	1
01-01-03-01-01-02-15.mp4	AV	Speech	Happy	Normal	Kids	R2	A15	3	3	1	1
01-01-03-01-01-02-16.mp4	AV	Speech	Happy	Normal	Kids	R2	A16	3	3	1	1
01-01-03-01-01-02-17.mp4	AV	Speech	Happy	Normal	Kids	R2	A17	3	3	1	1
01-01-03-01-01-02-18.mp4	AV	Speech	Happy	Normal	Kids	R2	A18	4	4	0	0
01-01-03-01-01-02-19.mp4	AV	Speech	Happy	Normal	Kids	R2	A19	7	3	0	1
01-01-03-01-01-02-20.mp4	AV	Speech	Happy	Normal	Kids	R2	A20	3	3	1	1
01-01-03-01-01-02-21.mp4	AV	Speech	Happy	Normal	Kids	R2	A21	3	3	1	1
01-01-03-01-01-02-22.mp4	AV	Speech	Happy	Normal	Kids	R2	A22	9	1	0	0
01-01-03-01-01-02-23.mp4	AV	Speech	Happy	Normal	Kids	R2	A23	3	3	1	1
01-01-03-01-01-02-24.mp4	AV	Speech	Happy	Normal	Kids	R2	A24	3	3	1	1
01-01-03-01-02-01-01.mp4	AV	Speech	Happy	Normal	Dogs	R1	A1	3	3	1	1
01-01-03-01-02-01-02.mp4	AV	Speech	Happy	Normal	Dogs	R1	A2	3	3	1	1
01-01-03-01-02-01-03.mp4	AV	Speech	Happy	Normal	Dogs	R1	A3	7	7	0	0
01-01-03-01-02-01-04.mp4	AV	Speech	Happy	Normal	Dogs	R1	A4	3	3	1	1
01-01-03-01-02-01-05.mp4	AV	Speech	Happy	Normal	Dogs	R1	A5	3	3	1	1
01-01-03-01-02-01-06.mp4	AV	Speech	Happy	Normal	Dogs	R1	A6	3	2	1	0
01-01-03-01-02-01-07.mp4	AV	Speech	Happy	Normal	Dogs	R1	A7	3	3	1	1
01-01-03-01-02-01-08.mp4	AV	Speech	Happy	Normal	Dogs	R1	A8	3	3	1	1
01-01-03-01-02-01-09.mp4	AV	Speech	Happy	Normal	Dogs	R1	A9	1	3	0	1
01-01-03-01-02-01-10.mp4	AV	Speech	Happy	Normal	Dogs	R1	A10	3	3	1	1
01-01-03-01-02-01-11.mp4	AV	Speech	Happy	Normal	Dogs	R1	A11	3	1	1	0
01-01-03-01-02-01-12.mp4	AV	Speech	Happy	Normal	Dogs	R1	A12	2	3	0	1
01-01-03-01-02-01-13.mp4	AV	Speech	Happy	Normal	Dogs	R1	A13	1	3	0	1
01-01-03-01-02-01-14.mp4	AV	Speech	Happy	Normal	Dogs	R1	A14	8	9	0	0
01-01-03-01-02-01-15.mp4	AV	Speech	Happy	Normal	Dogs	R1	A15	1	1	0	0
01-01-03-01-02-01-16.mp4	AV	Speech	Happy	Normal	Dogs	R1	A16	7	7	0	0
01-01-03-01-02-01-17.mp4	AV	Speech	Happy	Normal	Dogs	R1	A17	3	3	1	1
01-01-03-01-02-01-18.mp4	AV	Speech	Happy	Normal	Dogs	R1	A18	3	3	1	1
01-01-03-01-02-01-19.mp4	AV	Speech	Happy	Normal	Dogs	R1	A19	2	3	0	1
01-01-03-01-02-01-20.mp4	AV	Speech	Happy	Normal	Dogs	R1	A20	9	9	0	0
01-01-03-01-02-01-21.mp4	AV	Speech	Happy	Normal	Dogs	R1	A21	3	1	1	0
01-01-03-01-02-01-22.mp4	AV	Speech	Happy	Normal	Dogs	R1	A22	3	3	1	1
01-01-03-01-02-01-23.mp4	AV	Speech	Happy	Normal	Dogs	R1	A23	3	3	1	1
01-01-03-01-02-01-24.mp4	AV	Speech	Happy	Normal	Dogs	R1	A24	3	3	1	1
01-01-03-01-02-02-01.mp4	AV	Speech	Happy	Normal	Dogs	R2	A1	3	3	1	1
01-01-03-01-02-02-02.mp4	AV	Speech	Happy	Normal	Dogs	R2	A2	3	3	1	1
01-01-03-01-02-02-03.mp4	AV	Speech	Happy	Normal	Dogs	R2	A3	3	3	1	1
01-01-03-01-02-02-04.mp4	AV	Speech	Happy	Normal	Dogs	R2	A4	3	3	1	1
01-01-03-01-02-02-05.mp4	AV	Speech	Happy	Normal	Dogs	R2	A5	3	3	1	1
01-01-03-01-02-02-06.mp4	AV	Speech	Happy	Normal	Dogs	R2	A6	3	3	1	1
01-01-03-01-02-02-07.mp4	AV	Speech	Happy	Normal	Dogs	R2	A7	3	3	1	1
01-01-03-01-02-02-08.mp4	AV	Speech	Happy	Normal	Dogs	R2	A8	3	3	1	1
01-01-03-01-02-02-09.mp4	AV	Speech	Happy	Normal	Dogs	R2	A9	3	3	1	1
01-01-03-01-02-02-10.mp4	AV	Speech	Happy	Normal	Dogs	R2	A10	3	3	1	1
01-01-03-01-02-02-11.mp4	AV	Speech	Happy	Normal	Dogs	R2	A11	3	3	1	1
01-01-03-01-02-02-12.mp4	AV	Speech	Happy	Normal	Dogs	R2	A12	3	3	1	1
01-01-03-01-02-02-13.mp4	AV	Speech	Happy	Normal	Dogs	R2	A13	3	3	1	1
01-01-03-01-02-02-14.mp4	AV	Speech	Happy	Normal	Dogs	R2	A14	3	3	1	1
01-01-03-01-02-02-15.mp4	AV	Speech	Happy	Normal	Dogs	R2	A15	3	3	1	1
01-01-03-01-02-02-16.mp4	AV	Speech	Happy	Normal	Dogs	R2	A16	3	3	1	1
01-01-03-01-02-02-17.mp4	AV	Speech	Happy	Normal	Dogs	R2	A17	2	3	0	1
01-01-03-01-02-02-18.mp4	AV	Speech	Happy	Normal	Dogs	R2	A18	3	3	1	1
01-01-03-01-02-02-19.mp4	AV	Speech	Happy	Normal	Dogs	R2	A19	1	3	0	1
01-01-03-01-02-02-20.mp4	AV	Speech	Happy	Normal	Dogs	R2	A20	9	9	0	0
01-01-03-01-02-02-21.mp4	AV	Speech	Happy	Normal	Dogs	R2	A21	1	3	0	1
01-01-03-01-02-02-22.mp4	AV	Speech	Happy	Normal	Dogs	R2	A22	1	3	0	1
01-01-03-01-02-02-23.mp4	AV	Speech	Happy	Normal	Dogs	R2	A23	3	2	1	0
01-01-03-01-02-02-24.mp4	AV	Speech	Happy	Normal	Dogs	R2	A24	3	3	1	1
01-01-03-02-01-01-01.mp4	AV	Speech	Happy	Strong	Kids	R1	A1	3	3	1	1
01-01-03-02-01-01-02.mp4	AV	Speech	Happy	Strong	Kids	R1	A2	3	3	1	1
01-01-03-02-01-01-03.mp4	AV	Speech	Happy	Strong	Kids	R1	A3	3	3	1	1
01-01-03-02-01-01-04.mp4	AV	Speech	Happy	Strong	Kids	R1	A4	3	3	1	1
01-01-03-02-01-01-05.mp4	AV	Speech	Happy	Strong	Kids	R1	A5	3	8	1	0
01-01-03-02-01-01-06.mp4	AV	Speech	Happy	Strong	Kids	R1	A6	3	3	1	1
01-01-03-02-01-01-07.mp4	AV	Speech	Happy	Strong	Kids	R1	A7	3	3	1	1
01-01-03-02-01-01-08.mp4	AV	Speech	Happy	Strong	Kids	R1	A8	3	3	1	1
01-01-03-02-01-01-09.mp4	AV	Speech	Happy	Strong	Kids	R1	A9	3	3	1	1
01-01-03-02-01-01-10.mp4	AV	Speech	Happy	Strong	Kids	R1	A10	3	3	1	1
01-01-03-02-01-01-11.mp4	AV	Speech	Happy	Strong	Kids	R1	A11	3	3	1	1
01-01-03-02-01-01-12.mp4	AV	Speech	Happy	Strong	Kids	R1	A12	3	3	1	1
01-01-03-02-01-01-13.mp4	AV	Speech	Happy	Strong	Kids	R1	A13	3	3	1	1
01-01-03-02-01-01-14.mp4	AV	Speech	Happy	Strong	Kids	R1	A14	3	3	1	1
01-01-03-02-01-01-15.mp4	AV	Speech	Happy	Strong	Kids	R1	A15	3	3	1	1
01-01-03-02-01-01-16.mp4	AV	Speech	Happy	Strong	Kids	R1	A16	7	3	0	1
01-01-03-02-01-01-17.mp4	AV	Speech	Happy	Strong	Kids	R1	A17	8	9	0	0
01-01-03-02-01-01-18.mp4	AV	Speech	Happy	Strong	Kids	R1	A18	3	3	1	1
01-01-03-02-01-01-19.mp4	AV	Speech	Happy	Strong	Kids	R1	A19	3	3	1	1
01-01-03-02-01-01-20.mp4	AV	Speech	Happy	Strong	Kids	R1	A20	3	3	1	1
01-01-03-02-01-01-21.mp4	AV	Speech	Happy	Strong	Kids	R1	A21	3	3	1	1
01-01-03-02-01-01-22.mp4	AV	Speech	Happy	Strong	Kids	R1	A22	3	3	1	1
01-01-03-02-01-01-23.mp4	AV	Speech	Happy	Strong	Kids	R1	A23	3	3	1	1
01-01-03-02-01-01-24.mp4	AV	Speech	Happy	Strong	Kids	R1	A24	3	3	1	1
01-01-03-02-01-02-01.mp4	AV	Speech	Happy	Strong	Kids	R2	A1	3	3	1	1
01-01-03-02-01-02-02.mp4	AV	Speech	Happy	Strong	Kids	R2	A2	3	3	1	1
01-01-03-02-01-02-03.mp4	AV	Speech	Happy	Strong	Kids	R2	A3	8	4	0	0
01-01-03-02-01-02-04.mp4	AV	Speech	Happy	Strong	Kids	R2	A4	3	3	1	1
01-01-03-02-01-02-05.mp4	AV	Speech	Happy	Strong	Kids	R2	A5	3	3	1	1
01-01-03-02-01-02-06.mp4	AV	Speech	Happy	Strong	Kids	R2	A6	9	9	0	0
01-01-03-02-01-02-07.mp4	AV	Speech	Happy	Strong	Kids	R2	A7	3	3	1	1
01-01-03-02-01-02-08.mp4	AV	Speech	Happy	Strong	Kids	R2	A8	3	3	1	1
01-01-03-02-01-02-09.mp4	AV	Speech	Happy	Strong	Kids	R2	A9	3	3	1	1
01-01-03-02-01-02-10.mp4	AV	Speech	Happy	Strong	Kids	R2	A10	3	3	1	1
01-01-03-02-01-02-11.mp4	AV	Speech	Happy	Strong	Kids	R2	A11	3	3	1	1
01-01-03-02-01-02-12.mp4	AV	Speech	Happy	Strong	Kids	R2	A12	3	3	1	1
01-01-03-02-01-02-13.mp4	AV	Speech	Happy	Strong	Kids	R2	A13	3	3	1	1
01-01-03-02-01-02-14.mp4	AV	Speech	Happy	Strong	Kids	R2	A14	3	3	1	1
01-01-03-02-01-02-15.mp4	AV	Speech	Happy	Strong	Kids	R2	A15	3	3	1	1
01-01-03-02-01-02-16.mp4	AV	Speech	Happy	Strong	Kids	R2	A16	9	3	0	1
01-01-03-02-01-02-17.mp4	AV	Speech	Happy	Strong	Kids	R2	A17	7	9	0	0
01-01-03-02-01-02-18.mp4	AV	Speech	Happy	Strong	Kids	R2	A18	3	3	1	1
01-01-03-02-01-02-19.mp4	AV	Speech	Happy	Strong	Kids	R2	A19	3	3	1	1
01-01-03-02-01-02-20.mp4	AV	Speech	Happy	Strong	Kids	R2	A20	3	3	1	1
01-01-03-02-01-02-21.mp4	AV	Speech	Happy	Strong	Kids	R2	A21	3	3	1	1
01-01-03-02-01-02-22.mp4	AV	Speech	Happy	Strong	Kids	R2	A22	3	3	1	1
01-01-03-02-01-02-23.mp4	AV	Speech	Happy	Strong	Kids	R2	A23	8	8	0	0
01-01-03-02-01-02-24.mp4	AV	Speech	Happy	Strong	Kids	R2	A24	3	3	1	1
01-01-03-02-02-01-01.mp4	AV	Speech	Happy	Strong	Dogs	R1	A1	3	3	1	1
01-01-03-02-02-01-02.mp4	AV	Speech	Happy	Strong	Dogs	R1	A2	3	3	1	1
01-01-03-02-02-01-03.mp4	AV	Speech	Happy	Strong	Dogs	R1	A3	3	3	1	1
01-01-03-02-02-01-04.mp4	AV	Speech	Happy	Strong	Dogs	R1	A4	8	8	0	0
01-01-03-02-02-01-05.mp4	AV	Speech	Happy	Strong	Dogs	R1	A5	3	3	1	1
01-01-03-02-02-01-06.mp4	AV	Speech	Happy	Strong	Dogs	R1	A6	3	3	1	1
01-01-03-02-02-01-07.mp4	AV	Speech	Happy	Strong	Dogs	R1	A7	3	3	1	1
01-01-03-02-02-01-08.mp4	AV	Speech	Happy	Strong	Dogs	R1	A8	3	3	1	1
01-01-03-02-02-01-09.mp4	AV	Speech	Happy	Strong	Dogs	R1	A9	8	3	0	1
01-01-03-02-02-01-10.mp4	AV	Speech	Happy	Strong	Dogs	R1	A10	3	3	1	1
01-01-03-02-02-01-11.mp4	AV	Speech	Happy	Strong	Dogs	R1	A11	3	3	1	1
01-01-03-02-02-01-12.mp4	AV	Speech	Happy	Strong	Dogs	R1	A12	3	3	1	1
01-01-03-02-02-01-13.mp4	AV	Speech	Happy	Strong	Dogs	R1	A13	3	3	1	1
01-01-03-02-02-01-14.mp4	AV	Speech	Happy	Strong	Dogs	R1	A14	3	3	1	1
01-01-03-02-02-01-15.mp4	AV	Speech	Happy	Strong	Dogs	R1	A15	3	8	1	0
01-01-03-02-02-01-16.mp4	AV	Speech	Happy	Strong	Dogs	R1	A16	3	3	1	1
01-01-03-02-02-01-17.mp4	AV	Speech	Happy	Strong	Dogs	R1	A17	8	8	0	0
01-01-03-02-02-01-18.mp4	AV	Speech	Happy	Strong	Dogs	R1	A18	3	3	1	1
01-01-03-02-02-01-19.mp4	AV	Speech	Happy	Strong	Dogs	R1	A19	8	8	0	0
01-01-03-02-02-01-20.mp4	AV	Speech	Happy	Strong	Dogs	R1	A20	3	3	1	1
01-01-03-02-02-01-21.mp4	AV	Speech	Happy	Strong	Dogs	R1	A21	3	1	1	0
01-01-03-02-02-01-22.mp4	AV	Speech	Happy	Strong	Dogs	R1	A22	8	8	0	0
01-01-03-02-02-01-23.mp4	AV	Speech	Happy	Strong	Dogs	R1	A23	8	8	0	0
01-01-03-02-02-01-24.mp4	AV	Speech	Happy	Strong	Dogs	R1	A24	3	3	1	1
01-01-03-02-02-02-01.mp4	AV	Speech	Happy	Strong	Dogs	R2	A1	3	3	1	1
01-01-03-02-02-02-02.mp4	AV	Speech	Happy	Strong	Dogs	R2	A2	3	2	1	0
01-01-03-02-02-02-03.mp4	AV	Speech	Happy	Strong	Dogs	R2	A3	3	3	1	1
01-01-03-02-02-02-04.mp4	AV	Speech	Happy	Strong	Dogs	R2	A4	3	3	1	1
01-01-03-02-02-02-05.mp4	AV	Speech	Happy	Strong	Dogs	R2	A5	3	3	1	1
01-01-03-02-02-02-06.mp4	AV	Speech	Happy	Strong	Dogs	R2	A6	3	3	1	1
01-01-03-02-02-02-07.mp4	AV	Speech	Happy	Strong	Dogs	R2	A7	3	3	1	1
01-01-03-02-02-02-08.mp4	AV	Speech	Happy	Strong	Dogs	R2	A8	3	3	1	1
01-01-03-02-02-02-09.mp4	AV	Speech	Happy	Strong	Dogs	R2	A9	3	3	1	1
01-01-03-02-02-02-10.mp4	AV	Speech	Happy	Strong	Dogs	R2	A10	3	3	1	1
01-01-03-02-02-02-11.mp4	AV	Speech	Happy	Strong	Dogs	R2	A11	3	3	1	1
01-01-03-02-02-02-12.mp4	AV	Speech	Happy	Strong	Dogs	R2	A12	3	3	1	1
01-01-03-02-02-02-13.mp4	AV	Speech	Happy	Strong	Dogs	R2	A13	3	3	1	1
01-01-03-02-02-02-14.mp4	AV	Speech	Happy	Strong	Dogs	R2	A14	3	3	1	1
01-01-03-02-02-02-15.mp4	AV	Speech	Happy	Strong	Dogs	R2	A15	3	3	1	1
01-01-03-02-02-02-16.mp4	AV	Speech	Happy	Strong	Dogs	R2	A16	3	3	1	1
01-01-03-02-02-02-17.mp4	AV	Speech	Happy	Strong	Dogs	R2	A17	8	3	0	1
01-01-03-02-02-02-18.mp4	AV	Speech	Happy	Strong	Dogs	R2	A18	3	3	1	1
01-01-03-02-02-02-19.mp4	AV	Speech	Happy	Strong	Dogs	R2	A19	3	3	1	1
01-01-03-02-02-02-20.mp4	AV	Speech	Happy	Strong	Dogs	R2	A20	3	8	1	0
01-01-03-02-02-02-21.mp4	AV	Speech	Happy	Strong	Dogs	R2	A21	3	3	1	1
01-01-03-02-02-02-22.mp4	AV	Speech	Happy	Strong	Dogs	R2	A22	3	8	1	0
01-01-03-02-02-02-23.mp4	AV	Speech	Happy	Strong	Dogs	R2	A23	4	3	0	1
01-01-03-02-02-02-24.mp4	AV	Speech	Happy	Strong	Dogs	R2	A24	3	3	1	1
01-01-04-01-01-01-01.mp4	AV	Speech	Sad	Normal	Kids	R1	A1	4	4	1	1
01-01-04-01-01-01-02.mp4	AV	Speech	Sad	Normal	Kids	R1	A2	1	4	0	1
01-01-04-01-01-01-03.mp4	AV	Speech	Sad	Normal	Kids	R1	A3	4	4	1	1
01-01-04-01-01-01-04.mp4	AV	Speech	Sad	Normal	Kids	R1	A4	5	5	0	0
01-01-04-01-01-01-05.mp4	AV	Speech	Sad	Normal	Kids	R1	A5	2	4	0	1
01-01-04-01-01-01-06.mp4	AV	Speech	Sad	Normal	Kids	R1	A6	4	4	1	1
01-01-04-01-01-01-07.mp4	AV	Speech	Sad	Normal	Kids	R1	A7	4	4	1	1
01-01-04-01-01-01-08.mp4	AV	Speech	Sad	Normal	Kids	R1	A8	4	4	1	1
01-01-04-01-01-01-09.mp4	AV	Speech	Sad	Normal	Kids	R1	A9	4	4	1	1
01-01-04-01-01-01-10.mp4	AV	Speech	Sad	Normal	Kids	R1	A10	4	4	1	1
01-01-04-01-01-01-11.mp4	AV	Speech	Sad	Normal	Kids	R1	A11	2	2	0	0
01-01-04-01-01-01-12.mp4	AV	Speech	Sad	Normal	Kids	R1	A12	4	6	1	0
01-01-04-01-01-01-13.mp4	AV	Speech	Sad	Normal	Kids	R1	A13	1	2	0	0
01-01-04-01-01-01-14.mp4	AV	Speech	Sad	Normal	Kids	R1	A14	9	1	0	0
01-01-04-01-01-01-15.mp4	AV	Speech	Sad	Normal	Kids	R1	A15	4	1	1	0
01-01-04-01-01-01-16.mp4	AV	Speech	Sad	Normal	Kids	R1	A16	3	3	0	0
01-01-04-01-01-01-17.mp4	AV	Speech	Sad	Normal	Kids	R1	A17	4	4	1	1
01-01-04-01-01-01-18.mp4	AV	Speech	Sad	Normal	Kids	R1	A18	4	4	1	1
01-01-04-01-01-01-19.mp4	AV	Speech	Sad	Normal	Kids	R1	A19	4	8	1	0
01-01-04-01-01-01-20.mp4	AV	Speech	Sad	Normal	Kids	R1	A20	1	9	0	0
01-01-04-01-01-01-21.mp4	AV	Speech	Sad	Normal	Kids	R1	A21	7	1	0	0
01-01-04-01-01-01-22.mp4	AV	Speech	Sad	Normal	Kids	R1	A22	1	1	0	0
01-01-04-01-01-01-23.mp4	AV	Speech	Sad	Normal	Kids	R1	A23	1	1	0	0
01-01-04-01-01-01-24.mp4	AV	Speech	Sad	Normal	Kids	R1	A24	4	4	1	1
01-01-04-01-01-02-01.mp4	AV	Speech	Sad	Normal	Kids	R2	A1	4	4	1	1
01-01-04-01-01-02-02.mp4	AV	Speech	Sad	Normal	Kids	R2	A2	4	4	1	1
01-01-04-01-01-02-03.mp4	AV	Speech	Sad	Normal	Kids	R2	A3	4	4	1	1
01-01-04-01-01-02-04.mp4	AV	Speech	Sad	Normal	Kids	R2	A4	4	4	1	1
01-01-04-01-01-02-05.mp4	AV	Speech	Sad	Normal	Kids	R2	A5	4	4	1	1
01-01-04-01-01-02-06.mp4	AV	Speech	Sad	Normal	Kids	R2	A6	4	1	1	0
01-01-04-01-01-02-07.mp4	AV	Speech	Sad	Normal	Kids	R2	A7	7	4	0	1
01-01-04-01-01-02-08.mp4	AV	Speech	Sad	Normal	Kids	R2	A8	4	7	1	0
01-01-04-01-01-02-09.mp4	AV	Speech	Sad	Normal	Kids	R2	A9	4	4	1	1
01-01-04-01-01-02-10.mp4	AV	Speech	Sad	Normal	Kids	R2	A10	4	4	1	1
01-01-04-01-01-02-11.mp4	AV	Speech	Sad	Normal	Kids	R2	A11	3	1	0	0
01-01-04-01-01-02-12.mp4	AV	Speech	Sad	Normal	Kids	R2	A12	6	4	0	1
01-01-04-01-01-02-13.mp4	AV	Speech	Sad	Normal	Kids	R2	A13	2	1	0	0
01-01-04-01-01-02-14.mp4	AV	Speech	Sad	Normal	Kids	R2	A14	5	4	0	1
01-01-04-01-01-02-15.mp4	AV	Speech	Sad	Normal	Kids	R2	A15	4	1	1	0
01-01-04-01-01-02-16.mp4	AV	Speech	Sad	Normal	Kids	R2	A16	4	4	1	1
01-01-04-01-01-02-17.mp4	AV	Speech	Sad	Normal	Kids	R2	A17	1	4	0	1
01-01-04-01-01-02-18.mp4	AV	Speech	Sad	Normal	Kids	R2	A18	4	4	1	1
01-01-04-01-01-02-19.mp4	AV	Speech	Sad	Normal	Kids	R2	A19	7	7	0	0
01-01-04-01-01-02-20.mp4	AV	Speech	Sad	Normal	Kids	R2	A20	4	4	1	1
01-01-04-01-01-02-21.mp4	AV	Speech	Sad	Normal	Kids	R2	A21	1	1	0	0
01-01-04-01-01-02-22.mp4	AV	Speech	Sad	Normal	Kids	R2	A22	4	4	1	1
01-01-04-01-01-02-23.mp4	AV	Speech	Sad	Normal	Kids	R2	A23	9	9	0	0
01-01-04-01-01-02-24.mp4	AV	Speech	Sad	Normal	Kids	R2	A24	4	4	1	1
01-01-04-01-02-01-01.mp4	AV	Speech	Sad	Normal	Dogs	R1	A1	4	4	1	1
01-01-04-01-02-01-02.mp4	AV	Speech	Sad	Normal	Dogs	R1	A2	4	5	1	0
01-01-04-01-02-01-03.mp4	AV	Speech	Sad	Normal	Dogs	R1	A3	4	4	1	1
01-01-04-01-02-01-04.mp4	AV	Speech	Sad	Normal	Dogs	R1	A4	4	4	1	1
01-01-04-01-02-01-05.mp4	AV	Speech	Sad	Normal	Dogs	R1	A5	9	1	0	0
01-01-04-01-02-01-06.mp4	AV	Speech	Sad	Normal	Dogs	R1	A6	4	4	1	1
01-01-04-01-02-01-07.mp4	AV	Speech	Sad	Normal	Dogs	R1	A7	4	4	1	1
01-01-04-01-02-01-08.mp4	AV	Speech	Sad	Normal	Dogs	R1	A8	4	4	1	1
01-01-04-01-02-01-09.mp4	AV	Speech	Sad	Normal	Dogs	R1	A9	4	4	1	1
01-01-04-01-02-01-10.mp4	AV	Speech	Sad	Normal	Dogs	R1	A10	4	4	1	1
01-01-04-01-02-01-11.mp4	AV	Speech	Sad	Normal	Dogs	R1	A11	1	1	0	0
01-01-04-01-02-01-12.mp4	AV	Speech	Sad	Normal	Dogs	R1	A12	4	4	1	1
01-01-04-01-02-01-13.mp4	AV	Speech	Sad	Normal	Dogs	R1	A13	5	5	0	0
01-01-04-01-02-01-14.mp4	AV	Speech	Sad	Normal	Dogs	R1	A14	4	4	1	1
01-01-04-01-02-01-15.mp4	AV	Speech	Sad	Normal	Dogs	R1	A15	1	1	0	0
01-01-04-01-02-01-16.mp4	AV	Speech	Sad	Normal	Dogs	R1	A16	4	2	1	0
01-01-04-01-02-01-17.mp4	AV	Speech	Sad	Normal	Dogs	R1	A17	4	1	1	0
01-01-04-01-02-01-18.mp4	AV	Speech	Sad	Normal	Dogs	R1	A18	4	4	1	1
01-01-04-01-02-01-19.mp4	AV	Speech	Sad	Normal	Dogs	R1	A19	4	4	1	1
01-01-04-01-02-01-20.mp4	AV	Speech	Sad	Normal	Dogs	R1	A20	2	2	0	0
01-01-04-01-02-01-21.mp4	AV	Speech	Sad	Normal	Dogs	R1	A21	3	9	0	0
01-01-04-01-02-01-22.mp4	AV	Speech	Sad	Normal	Dogs	R1	A22	2	4	0	1
01-01-04-01-02-01-23.mp4	AV	Speech	Sad	Normal	Dogs	R1	A23	1	1	0	0
01-01-04-01-02-01-24.mp4	AV	Speech	Sad	Normal	Dogs	R1	A24	4	9	1	0
01-01-04-01-02-02-01.mp4	AV	Speech	Sad	Normal	Dogs	R2	A1	1	1	0	0
01-01-04-01-02-02-02.mp4	AV	Speech	Sad	Normal	Dogs	R2	A2	1	5	0	0
01-01-04-01-02-02-03.mp4	AV	Speech	Sad	Normal	Dogs	R2	A3	4	4	1	1
01-01-04-01-02-02-04.mp4	AV	Speech	Sad	Normal	Dogs	R2	A4	4	4	1	1
01-01-04-01-02-02-05.mp4	AV	Speech	Sad	Normal	Dogs	R2	A5	4	4	1	1
01-01-04-01-02-02-06.mp4	AV	Speech	Sad	Normal	Dogs	R2	A6	4	4	1	1
01-01-04-01-02-02-07.mp4	AV	Speech	Sad	Normal	Dogs	R2	A7	4	4	1	1
01-01-04-01-02-02-08.mp4	AV	Speech	Sad	Normal	Dogs	R2	A8	4	4	1	1
01-01-04-01-02-02-09.mp4	AV	Speech	Sad	Normal	Dogs	R2	A9	4	4	1	1
01-01-04-01-02-02-10.mp4	AV	Speech	Sad	Normal	Dogs	R2	A10	4	4	1	1
01-01-04-01-02-02-11.mp4	AV	Speech	Sad	Normal	Dogs	R2	A11	1	4	0	1
01-01-04-01-02-02-12.mp4	AV	Speech	Sad	Normal	Dogs	R2	A12	4	4	1	1
01-01-04-01-02-02-13.mp4	AV	Speech	Sad	Normal	Dogs	R2	A13	7	1	0	0
01-01-04-01-02-02-14.mp4	AV	Speech	Sad	Normal	Dogs	R2	A14	1	9	0	0
01-01-04-01-02-02-15.mp4	AV	Speech	Sad	Normal	Dogs	R2	A15	4	4	1	1
01-01-04-01-02-02-16.mp4	AV	Speech	Sad	Normal	Dogs	R2	A16	4	4	1	1
01-01-04-01-02-02-17.mp4	AV	Speech	Sad	Normal	Dogs	R2	A17	4	4	1	1
01-01-04-01-02-02-18.mp4	AV	Speech	Sad	Normal	Dogs	R2	A18	9	4	0	1
01-01-04-01-02-02-19.mp4	AV	Speech	Sad	Normal	Dogs	R2	A19	4	9	1	0
01-01-04-01-02-02-20.mp4	AV	Speech	Sad	Normal	Dogs	R2	A20	4	4	1	1
01-01-04-01-02-02-21.mp4	AV	Speech	Sad	Normal	Dogs	R2	A21	8	7	0	0
01-01-04-01-02-02-22.mp4	AV	Speech	Sad	Normal	Dogs	R2	A22	4	4	1	1
01-01-04-01-02-02-23.mp4	AV	Speech	Sad	Normal	Dogs	R2	A23	4	4	1	1
01-01-04-01-02-02-24.mp4	AV	Speech	Sad	Normal	Dogs	R2	A24	1	1	0	0
01-01-04-02-01-01-01.mp4	AV	Speech	Sad	Strong	Kids	R1	A1	4	4	1	1
01-01-04-02-01-01-02.mp4	AV	Speech	Sad	Strong	Kids	R1	A2	4	4	1	1
01-01-04-02-01-01-03.mp4	AV	Speech	Sad	Strong	Kids	R1	A3	4	4	1	1
01-01-04-02-01-01-04.mp4	AV	Speech	Sad	Strong	Kids	R1	A4	4	4	1	1
01-01-04-02-01-01-05.mp4	AV	Speech	Sad	Strong	Kids	R1	A5	4	4	1	1
01-01-04-02-01-01-06.mp4	AV	Speech	Sad	Strong	Kids	R1	A6	4	4	1	1
01-01-04-02-01-01-07.mp4	AV	Speech	Sad	Strong	Kids	R1	A7	4	4	1	1
01-01-04-02-01-01-08.mp4	AV	Speech	Sad	Strong	Kids	R1	A8	6	6	0	0
01-01-04-02-01-01-09.mp4	AV	Speech	Sad	Strong	Kids	R1	A9	4	4	1	1
01-01-04-02-01-01-10.mp4	AV	Speech	Sad	Strong	Kids	R1	A10	4	4	1	1
01-01-04-02-01-01-11.mp4	AV	Speech	Sad	Strong	Kids	R1	A11	6	7	0	0
01-01-04-02-01-01-12.mp4	AV	Speech	Sad	Strong	Kids	R1	A12	4	4	1	1
01-01-04-02-01-01-13.mp4	AV	Speech	Sad	Strong	Kids	R1	A13	4	4	1	1
01-01-04-02-01-01-14.mp4	AV	Speech	Sad	Strong	Kids	R1	A14	4	4	1	1
01-01-04-02-01-01-15.mp4	AV	Speech	Sad	Strong	Kids	R1	A15	4	8	1	0
01-01-04-02-01-01-16.mp4	AV	Speech	Sad	Strong	Kids	R1	A16	4	4	1	1
01-01-04-02-01-01-17.mp4	AV	Speech	Sad	Strong	Kids	R1	A17	6	6	0	0
01-01-04-02-01-01-18.mp4	AV	Speech	Sad	Strong	Kids	R1	A18	4	4	1	1
01-01-04-02-01-01-19.mp4	AV	Speech	Sad	Strong	Kids	R1	A19	4	4	1	1
01-01-04-02-01-01-20.mp4	AV	Speech	Sad	Strong	Kids	R1	A20	4	4	1	1
01-01-04-02-01-01-21.mp4	AV	Speech	Sad	Strong	Kids	R1	A21	4	9	1	0
01-01-04-02-01-01-22.mp4	AV	Speech	Sad	Strong	Kids	R1	A22	4	9	1	0
01-01-04-02-01-01-23.mp4	AV	Speech	Sad	Strong	Kids	R1	A23	9	9	0	0
01-01-04-02-01-01-24.mp4	AV	Speech	Sad	Strong	Kids	R1	A24	4	4	1	1
01-01-04-02-01-02-01.mp4	AV	Speech	Sad	Strong	Kids	R2	A1	4	6	1	0
01-01-04-02-01-02-02.mp4	AV	Speech	Sad	Strong	Kids	R2	A2	6	6	0	0
01-01-04-02-01-02-03.mp4	AV	Speech	Sad	Strong	Kids	R2	A3	4	4	1	1
01-01-04-02-01-02-04.mp4	AV	Speech	Sad	Strong	Kids	R2	A4	4	4	1	1
01-01-04-02-01-02-05.mp4	AV	Speech	Sad	Strong	Kids	R2	A5	4	4	1	1
01-01-04-02-01-02-06.mp4	AV	Speech	Sad	Strong	Kids	R2	A6	4	4	1	1
01-01-04-02-01-02-07.mp4	AV	Speech	Sad	Strong	Kids	R2	A7	4	4	1	1
01-01-04-02-01-02-08.mp4	AV	Speech	Sad	Strong	Kids	R2	A8	4	4	1	1
01-01-04-02-01-02-09.mp4	AV	Speech	Sad	Strong	Kids	R2	A9	4	4	1	1
01-01-04-02-01-02-10.mp4	AV	Speech	Sad	Strong	Kids	R2	A10	4	6	1	0
01-01-04-02-01-02-11.mp4	AV	Speech	Sad	Strong	Kids	R2	A11	4	9	1	0
01-01-04-02-01-02-12.mp4	AV	Speech	Sad	Strong	Kids	R2	A12	4	4	1	1
01-01-04-02-01-02-13.mp4	AV	Speech	Sad	Strong	Kids	R2	A13	6	4	0	1
01-01-04-02-01-02-14.mp4	AV	Speech	Sad	Strong	Kids	R2	A14	4	6	1	0
01-01-04-02-01-02-15.mp4	AV	Speech	Sad	Strong	Kids	R2	A15	3	3	0	0
01-01-04-02-01-02-16.mp4	AV	Speech	Sad	Strong	Kids	R2	A16	4	4	1	1
01-01-04-02-01-02-17.mp4	AV	Speech	Sad	Strong	Kids	R2	A17	4	6	1	0
01-01-04-02-01-02-18.mp4	AV	Speech	Sad	Strong	Kids	R2	A18	4	4	1	1
01-01-04-02-01-02-19.mp4	AV	Speech	Sad	Strong	Kids	R2	A19	4	4	1	1
01-01-04-02-01-02-20.mp4	AV	Speech	Sad	Strong	Kids	R2	A20	6	6	0	0
01-01-04-02-01-02-21.mp4	AV	Speech	Sad	Strong	Kids	R2	A21	4	4	1	1
01-01-04-02-01-02-22.mp4	AV	Speech	Sad	Strong	Kids	R2	A22	6	4	0	1
01-01-04-02-01-02-23.mp4	AV	Speech	Sad	Strong	Kids	R2	A23	4	4	1	1
01-01-04-02-01-02-24.mp4	AV	Speech	Sad	Strong	Kids	R2	A24	4	4	1	1
01-01-04-02-02-01-01.mp4	AV	Speech	Sad	Strong	Dogs	R1	A1	4	4	1	1
01-01-04-02-02-01-02.mp4	AV	Speech	Sad	Strong	Dogs	R1	A2	4	4	1	1
01-01-04-02-02-01-03.mp4	AV	Speech	Sad	Strong	Dogs	R1	A3	4	4	1	1
01-01-04-02-02-01-04.mp4	AV	Speech	Sad	Strong	Dogs	R1	A4	4	4	1	1
01-01-04-02-02-01-05.mp4	AV	Speech	Sad	Strong	Dogs	R1	A5	6	6	0	0
01-01-04-02-02-01-06.mp4	AV	Speech	Sad	Strong	Dogs	R1	A6	6	6	0	0
01-01-04-02-02-01-07.mp4	AV	Speech	Sad	Strong	Dogs	R1	A7	4	4	1	1
01-01-04-02-02-01-08.mp4	AV	Speech	Sad	Strong	Dogs	R1	A8	4	4	1	1
01-01-04-02-02-01-09.mp4	AV	Speech	Sad	Strong	Dogs	R1	A9	4	4	1	1
01-01-04-02-02-01-10.mp4	AV	Speech	Sad	Strong	Dogs	R1	A10	4	4	1	1
01-01-04-02-02-01-11.mp4	AV	Speech	Sad	Strong	Dogs	R1	A11	6	4	0	1
01-01-04-02-02-01-12.mp4	AV	Speech	Sad	Strong	Dogs	R1	A12	6	4	0	1
01-01-04-02-02-01-13.mp4	AV	Speech	Sad	Strong	Dogs	R1	A13	7	4	0	1
01-01-04-02-02-01-14.mp4	AV	Speech	Sad	Strong	Dogs	R1	A14	4	4	1	1
01-01-04-02-02-01-15.mp4	AV	Speech	Sad	Strong	Dogs	R1	A15	4	4	1	1
01-01-04-02-02-01-16.mp4	AV	Speech	Sad	Strong	Dogs	R1	A16	4	4	1	1
01-01-04-02-02-01-17.mp4	AV	Speech	Sad	Strong	Dogs	R1	A17	6	6	0	0
01-01-04-02-02-01-18.mp4	AV	Speech	Sad	Strong	Dogs	R1	A18	4	4	1	1
01-01-04-02-02-01-19.mp4	AV	Speech	Sad	Strong	Dogs	R1	A19	4	4	1	1
01-01-04-02-02-01-20.mp4	AV	Speech	Sad	Strong	Dogs	R1	A20	4	4	1	1
01-01-04-02-02-01-21.mp4	AV	Speech	Sad	Strong	Dogs	R1	A21	4	4	1	1
01-01-04-02-02-01-22.mp4	AV	Speech	Sad	Strong	Dogs	R1	A22	4	4	1	1
01-01-04-02-02-01-23.mp4	AV	Speech	Sad	Strong	Dogs	R1	A23	4	4	1	1
01-01-04-02-02-01-24.mp4	AV	Speech	Sad	Strong	Dogs	R1	A24	4	4	1	1
01-01-04-02-02-02-01.mp4	AV	Speech	Sad	Strong	Dogs	R2	A1	4	4	1	1
01-01-04-02-02-02-02.mp4	AV	Speech	Sad	Strong	Dogs	R2	A2	4	4	1	1
01-01-04-02-02-02-03.mp4	AV	Speech	Sad	Strong	Dogs	R2	A3	4	4	1	1
01-01-04-02-02-02-04.mp4	AV	Speech	Sad	Strong	Dogs	R2	A4	4	4	1	1
01-01-04-02-02-02-05.mp4	AV	Speech	Sad	Strong	Dogs	R2	A5	4	4	1	1
01-01-04-02-02-02-06.mp4	AV	Speech	Sad	Strong	Dogs	R2	A6	4	4	1	1
01-01-04-02-02-02-07.mp4	AV	Speech	Sad	Strong	Dogs	R2	A7	4	4	1	1
01-01-04-02-02-02-08.mp4	AV	Speech	Sad	Strong	Dogs	R2	A8	4	4	1	1
01-01-04-02-02-02-09.mp4	AV	Speech	Sad	Strong	Dogs	R2	A9	4	4	1	1
01-01-04-02-02-02-10.mp4	AV	Speech	Sad	Strong	Dogs	R2	A10	4	4	1	1
01-01-04-02-02-02-11.mp4	AV	Speech	Sad	Strong	Dogs	R2	A11	4	4	1	1
01-01-04-02-02-02-12.mp4	AV	Speech	Sad	Strong	Dogs	R2	A12	4	6	1	0
01-01-04-02-02-02-13.mp4	AV	Speech	Sad	Strong	Dogs	R2	A13	4	4	1	1
01-01-04-02-02-02-14.mp4	AV	Speech	Sad	Strong	Dogs	R2	A14	4	9	1	0
01-01-04-02-02-02-15.mp4	AV	Speech	Sad	Strong	Dogs	R2	A15	4	4	1	1
01-01-04-02-02-02-16.mp4	AV	Speech	Sad	Strong	Dogs	R2	A16	4	4	1	1
01-01-04-02-02-02-17.mp4	AV	Speech	Sad	Strong	Dogs	R2	A17	6	4	0	1
01-01-04-02-02-02-18.mp4	AV	Speech	Sad	Strong	Dogs	R2	A18	4	4	1	1
01-01-04-02-02-02-19.mp4	AV	Speech	Sad	Strong	Dogs	R2	A19	4	4	1	1
01-01-04-02-02-02-20.mp4	AV	Speech	Sad	Strong	Dogs	R2	A20	4	4	1	1
01-01-04-02-02-02-21.mp4	AV	Speech	Sad	Strong	Dogs	R2	A21	7	4	0	1
01-01-04-02-02-02-22.mp4	AV	Speech	Sad	Strong	Dogs	R2	A22	6	1	0	0
01-01-04-02-02-02-23.mp4	AV	Speech	Sad	Strong	Dogs	R2	A23	2	4	0	1
01-01-04-02-02-02-24.mp4	AV	Speech	Sad	Strong	Dogs	R2	A24	4	4	1	1
01-01-05-01-01-01-01.mp4	AV	Speech	Angry	Normal	Kids	R1	A1	5	5	1	1
01-01-05-01-01-01-02.mp4	AV	Speech	Angry	Normal	Kids	R1	A2	5	7	1	0
01-01-05-01-01-01-03.mp4	AV	Speech	Angry	Normal	Kids	R1	A3	5	5	1	1
01-01-05-01-01-01-04.mp4	AV	Speech	Angry	Normal	Kids	R1	A4	5	5	1	1
01-01-05-01-01-01-05.mp4	AV	Speech	Angry	Normal	Kids	R1	A5	5	5	1	1
01-01-05-01-01-01-06.mp4	AV	Speech	Angry	Normal	Kids	R1	A6	5	7	1	0
01-01-05-01-01-01-07.mp4	AV	Speech	Angry	Normal	Kids	R1	A7	5	5	1	1
01-01-05-01-01-01-08.mp4	AV	Speech	Angry	Normal	Kids	R1	A8	7	7	0	0
01-01-05-01-01-01-09.mp4	AV	Speech	Angry	Normal	Kids	R1	A9	5	5	1	1
01-01-05-01-01-01-10.mp4	AV	Speech	Angry	Normal	Kids	R1	A10	5	5	1	1
01-01-05-01-01-01-11.mp4	AV	Speech	Angry	Normal	Kids	R1	A11	1	5	0	1
01-01-05-01-01-01-12.mp4	AV	Speech	Angry	Normal	Kids	R1	A12	7	5	0	1
01-01-05-01-01-01-13.mp4	AV	Speech	Angry	Normal	Kids	R1	A13	5	5	1	1
01-01-05-01-01-01-14.mp4	AV	Speech	Angry	Normal	Kids	R1	A14	5	7	1	0
01-01-05-01-01-01-15.mp4	AV	Speech	Angry	Normal	Kids	R1	A15	7	5	0	1
01-01-05-01-01-01-16.mp4	AV	Speech	Angry	Normal	Kids	R1	A16	5	5	1	1
01-01-05-01-01-01-17.mp4	AV	Speech	Angry	Normal	Kids	R1	A17	5	7	1	0
01-01-05-01-01-01-18.mp4	AV	Speech	Angry	Normal	Kids	R1	A18	5	7	1	0
01-01-05-01-01-01-19.mp4	AV	Speech	Angry	Normal	Kids	R1	A19	7	7	0	0
01-01-05-01-01-01-20.mp4	AV	Speech	Angry	Normal	Kids	R1	A20	7	5	0	1
01-01-05-01-01-01-21.mp4	AV	Speech	Angry	Normal	Kids	R1	A21	5	5	1	1
01-01-05-01-01-01-22.mp4	AV	Speech	Angry	Normal	Kids	R1	A22	7	5	0	1
01-01-05-01-01-01-23.mp4	AV	Speech	Angry	Normal	Kids	R1	A23	7	5	0	1
01-01-05-01-01-01-24.mp4	AV	Speech	Angry	Normal	Kids	R1	A24	5	5	1	1
01-01-05-01-01-02-01.mp4	AV	Speech	Angry	Normal	Kids	R2	A1	7	7	0	0
01-01-05-01-01-02-02.mp4	AV	Speech	Angry	Normal	Kids	R2	A2	2	5	0	1
01-01-05-01-01-02-03.mp4	AV	Speech	Angry	Normal	Kids	R2	A3	5	5	1	1
01-01-05-01-01-02-04.mp4	AV	Speech	Angry	Normal	Kids	R2	A4	7	5	0	1
01-01-05-01-01-02-05.mp4	AV	Speech	Angry	Normal	Kids	R2	A5	5	5	1	1
01-01-05-01-01-02-06.mp4	AV	Speech	Angry	Normal	Kids	R2	A6	7	7	0	0
01-01-05-01-01-02-07.mp4	AV	Speech	Angry	Normal	Kids	R2	A7	5	5	1	1
01-01-05-01-01-02-08.mp4	AV	Speech	Angry	Normal	Kids	R2	A8	7	7	0	0
01-01-05-01-01-02-09.mp4	AV	Speech	Angry	Normal	Kids	R2	A9	5	5	1	1
01-01-05-01-01-02-10.mp4	AV	Speech	Angry	Normal	Kids	R2	A10	5	5	1	1
01-01-05-01-01-02-11.mp4	AV	Speech	Angry	Normal	Kids	R2	A11	7	7	0	0
01-01-05-01-01-02-12.mp4	AV	Speech	Angry	Normal	Kids	R2	A12	7	7	0	0
01-01-05-01-01-02-13.mp4	AV	Speech	Angry	Normal	Kids	R2	A13	5	5	1	1
01-01-05-01-01-02-14.mp4	AV	Speech	Angry	Normal	Kids	R2	A14	5	5	1	1
01-01-05-01-01-02-15.mp4	AV	Speech	Angry	Normal	Kids	R2	A15	7	5	0	1
01-01-05-01-01-02-16.mp4	AV	Speech	Angry	Normal	Kids	R2	A16	5	5	1	1
01-01-05-01-01-02-17.mp4	AV	Speech	Angry	Normal	Kids	R2	A17	5	5	1	1
01-01-05-01-01-02-18.mp4	AV	Speech	Angry	Normal	Kids	R2	A18	5	5	1	1
01-01-05-01-01-02-19.mp4	AV	Speech	Angry	Normal	Kids	R2	A19	5	5	1	1
01-01-05-01-01-02-20.mp4	AV	Speech	Angry	Normal	Kids	R2	A20	5	5	1	1
01-01-05-01-01-02-21.mp4	AV	Speech	Angry	Normal	Kids	R2	A21	5	9	1	0
01-01-05-01-01-02-22.mp4	AV	Speech	Angry	Normal	Kids	R2	A22	6	6	0	0
01-01-05-01-01-02-23.mp4	AV	Speech	Angry	Normal	Kids	R2	A23	7	5	0	1
01-01-05-01-01-02-24.mp4	AV	Speech	Angry	Normal	Kids	R2	A24	9	5	0	1
01-01-05-01-02-01-01.mp4	AV	Speech	Angry	Normal	Dogs	R1	A1	1	1	0	0
01-01-05-01-02-01-02.mp4	AV	Speech	Angry	Normal	Dogs	R1	A2	7	7	0	0
01-01-05-01-02-01-03.mp4	AV	Speech	Angry	Normal	Dogs	R1	A3	5	5	1	1
01-01-05-01-02-01-04.mp4	AV	Speech	Angry	Normal	Dogs	R1	A4	5	5	1	1
01-01-05-01-02-01-05.mp4	AV	Speech	Angry	Normal	Dogs	R1	A5	7	7	0	0
01-01-05-01-02-01-06.mp4	AV	Speech	Angry	Normal	Dogs	R1	A6	5	5	1	1
01-01-05-01-02-01-07.mp4	AV	Speech	Angry	Normal	Dogs	R1	A7	5	5	1	1
01-01-05-01-02-01-08.mp4	AV	Speech	Angry	Normal	Dogs	R1	A8	5	7	1	0
01-01-05-01-02-01-09.mp4	AV	Speech	Angry	Normal	Dogs	R1	A9	5	5	1	1
01-01-05-01-02-01-10.mp4	AV	Speech	Angry	Normal	Dogs	R1	A10	5	5	1	1
01-01-05-01-02-01-11.mp4	AV	Speech	Angry	Normal	Dogs	R1	A11	1	9	0	0
01-01-05-01-02-01-12.mp4	AV	Speech	Angry	Normal	Dogs	R1	A12	5	7	1	0
01-01-05-01-02-01-13.mp4	AV	Speech	Angry	Normal	Dogs	R1	A13	5	5	1	1
01-01-05-01-02-01-14.mp4	AV	Speech	Angry	Normal	Dogs	R1	A14	7	7	0	0
01-01-05-01-02-01-15.mp4	AV	Speech	Angry	Normal	Dogs	R1	A15	2	2	0	0
01-01-05-01-02-01-16.mp4	AV	Speech	Angry	Normal	Dogs	R1	A16	5	5	1	1
01-01-05-01-02-01-17.mp4	AV	Speech	Angry	Normal	Dogs	R1	A17	1	5	0	1
01-01-05-01-02-01-18.mp4	AV	Speech	Angry	Normal	Dogs	R1	A18	5	5	1	1
01-01-05-01-02-01-19.mp4	AV	Speech	Angry	Normal	Dogs	R1	A19	7	7	0	0
01-01-05-01-02-01-20.mp4	AV	Speech	Angry	Normal	Dogs	R1	A20	5	5	1	1
01-01-05-01-02-01-21.mp4	AV	Speech	Angry	Normal	Dogs	R1	A21	5	5	1	1
01-01-05-01-02-01-22.mp4	AV	Speech	Angry	Normal	Dogs	R1	A22	5	7	1	0
01-01-05-01-02-01-23.mp4	AV	Speech	Angry	Normal	Dogs	R1	A23	5	7	1	0
01-01-05-01-02-01-24.mp4	AV	Speech	Angry	Normal	Dogs	R1	A24	7	7	0	0
01-01-05-01-02-02-01.mp4	AV	Speech	Angry	Normal	Dogs	R2	A1	2	4	0	0
01-01-05-01-02-02-02.mp4	AV	Speech	Angry	Normal	Dogs	R2	A2	7	5	0	1
01-01-05-01-02-02-03.mp4	AV	Speech	Angry	Normal	Dogs	R2	A3	5	5	1	1
01-01-05-01-02-02-04.mp4	AV	Speech	Angry	Normal	Dogs	R2	A4	5	5	1	1
01-01-05-01-02-02-05.mp4	AV	Speech	Angry	Normal	Dogs	R2	A5	5	5	1	1
01-01-05-01-02-02-06.mp4	AV	Speech	Angry	Normal	Dogs	R2	A6	5	5	1	1
01-01-05-01-02-02-07.mp4	AV	Speech	Angry	Normal	Dogs	R2	A7	5	5	1	1
01-01-05-01-02-02-08.mp4	AV	Speech	Angry	Normal	Dogs	R2	A8	5	5	1	1
01-01-05-01-02-02-09.mp4	AV	Speech	Angry	Normal	Dogs	R2	A9	5	5	1	1
01-01-05-01-02-02-10.mp4	AV	Speech	Angry	Normal	Dogs	R2	A10	5	5	1	1
01-01-05-01-02-02-11.mp4	AV	Speech	Angry	Normal	Dogs	R2	A11	5	5	1	1
01-01-05-01-02-02-12.mp4	AV	Speech	Angry	Normal	Dogs	R2	A12	5	5	1	1
01-01-05-01-02-02-13.mp4	AV	Speech	Angry	Normal	Dogs	R2	A13	5	5	1	1
01-01-05-01-02-02-14.mp4	AV	Speech	Angry	Normal	Dogs	R2	A14	5	5	1	1
01-01-05-01-02-02-15.mp4	AV	Speech	Angry	Normal	Dogs	R2	A15	5	5	1	1
01-01-05-01-02-02-16.mp4	AV	Speech	Angry	Normal	Dogs	R2	A16	5	5	1	1
01-01-05-01-02-02-17.mp4	AV	Speech	Angry	Normal	Dogs	R2	A17	1	1	0	0
01-01-05-01-02-02-18.mp4	AV	Speech	Angry	Normal	Dogs	R2	A18	5	5	1	1
01-01-05-01-02-02-19.mp4	AV	Speech	Angry	Normal	Dogs	R2	A19	5	5	1	1
01-01-05-01-02-02-20.mp4	AV	Speech	Angry	Normal	Dogs	R2	A20	9	5	0	1
01-01-05-01-02-02-21.mp4	AV	Speech	Angry	Normal	Dogs	R2	A21	5	7	1	0
01-01-05-01-02-02-22.mp4	AV	Speech	Angry	Normal	Dogs	R2	A22	5	7	1	0
01-01-05-01-02-02-23.mp4	AV	Speech	Angry	Normal	Dogs	R2	A23	7	7	0	0
01-01-05-01-02-02-24.mp4	AV	Speech	Angry	Normal	Dogs	R2	A24	5	5	1	1
01-01-05-02-01-01-01.mp4	AV	Speech	Angry	Strong	Kids	R1	A1	5	4	1	0
01-01-05-02-01-01-02.mp4	AV	Speech	Angry	Strong	Kids	R1	A2	5	5	1	1
01-01-05-02-01-01-03.mp4	AV	Speech	Angry	Strong	Kids	R1	A3	5	5	1	1
01-01-05-02-01-01-04.mp4	AV	Speech	Angry	Strong	Kids	R1	A4	5	5	1	1
01-01-05-02-01-01-05.mp4	AV	Speech	Angry	Strong	Kids	R1	A5	5	6	1	0
01-01-05-02-01-01-06.mp4	AV	Speech	Angry	Strong	Kids	R1	A6	5	5	1	1
01-01-05-02-01-01-07.mp4	AV	Speech	Angry	Strong	Kids	R1	A7	5	5	1	1
01-01-05-02-01-01-08.mp4	AV	Speech	Angry	Strong	Kids	R1	A8	7	7	0	0
01-01-05-02-01-01-09.mp4	AV	Speech	Angry	Strong	Kids	R1	A9	6	5	0	1
01-01-05-02-01-01-10.mp4	AV	Speech	Angry	Strong	Kids	R1	A10	5	5	1	1
01-01-05-02-01-01-11.mp4	AV	Speech	Angry	Strong	Kids	R1	A11	5	5	1	1
01-01-05-02-01-01-12.mp4	AV	Speech	Angry	Strong	Kids	R1	A12	5	5	1	1
01-01-05-02-01-01-13.mp4	AV	Speech	Angry	Strong	Kids	R1	A13	5	5	1	1
01-01-05-02-01-01-14.mp4	AV	Speech	Angry	Strong	Kids	R1	A14	5	5	1	1
01-01-05-02-01-01-15.mp4	AV	Speech	Angry	Strong	Kids	R1	A15	5	5	1	1
01-01-05-02-01-01-16.mp4	AV	Speech	Angry	Strong	Kids	R1	A16	5	5	1	1
01-01-05-02-01-01-17.mp4	AV	Speech	Angry	Strong	Kids	R1	A17	5	5	1	1
01-01-05-02-01-01-18.mp4	AV	Speech	Angry	Strong	Kids	R1	A18	5	7	1	0
01-01-05-02-01-01-19.mp4	AV	Speech	Angry	Strong	Kids	R1	A19	5	5	1	1
01-01-05-02-01-01-20.mp4	AV	Speech	Angry	Strong	Kids	R1	A20	5	5	1	1
01-01-05-02-01-01-21.mp4	AV	Speech	Angry	Strong	Kids	R1	A21	5	5	1	1
01-01-05-02-01-01-22.mp4	AV	Speech	Angry	Strong	Kids	R1	A22	5	5	1	1
01-01-05-02-01-01-23.mp4	AV	Speech	Angry	Strong	Kids	R1	A23	5	5	1	1
01-01-05-02-01-01-24.mp4	AV	Speech	Angry	Strong	Kids	R1	A24	6	5	0	1
01-01-05-02-01-02-01.mp4	AV	Speech	Angry	Strong	Kids	R2	A1	5	5	1	1
01-01-05-02-01-02-02.mp4	AV	Speech	Angry	Strong	Kids	R2	A2	5	5	1	1
01-01-05-02-01-02-03.mp4	AV	Speech	Angry	Strong	Kids	R2	A3	5	5	1	1
01-01-05-02-01-02-04.mp4	AV	Speech	Angry	Strong	Kids	R2	A4	5	5	1	1
01-01-05-02-01-02-05.mp4	AV	Speech	Angry	Strong	Kids	R2	A5	5	5	1	1
01-01-05-02-01-02-06.mp4	AV	Speech	Angry	Strong	Kids	R2	A6	5	5	1	1
01-01-05-02-01-02-07.mp4	AV	Speech	Angry	Strong	Kids	R2	A7	5	5	1	1
01-01-05-02-01-02-08.mp4	AV	Speech	Angry	Strong	Kids	R2	A8	5	5	1	1
01-01-05-02-01-02-09.mp4	AV	Speech	Angry	Strong	Kids	R2	A9	5	5	1	1
01-01-05-02-01-02-10.mp4	AV	Speech	Angry	Strong	Kids	R2	A10	5	5	1	1
01-01-05-02-01-02-11.mp4	AV	Speech	Angry	Strong	Kids	R2	A11	5	5	1	1
01-01-05-02-01-02-12.mp4	AV	Speech	Angry	Strong	Kids	R2	A12	5	5	1	1
01-01-05-02-01-02-13.mp4	AV	Speech	Angry	Strong	Kids	R2	A13	5	5	1	1
01-01-05-02-01-02-14.mp4	AV	Speech	Angry	Strong	Kids	R2	A14	5	5	1	1
01-01-05-02-01-02-15.mp4	AV	Speech	Angry	Strong	Kids	R2	A15	5	5	1	1
01-01-05-02-01-02-16.mp4	AV	Speech	Angry	Strong	Kids	R2	A16	5	5	1	1
01-01-05-02-01-02-17.mp4	AV	Speech	Angry	Strong	Kids	R2	A17	5	5	1	1
01-01-05-02-01-02-18.mp4	AV	Speech	Angry	Strong	Kids	R2	A18	5	5	1	1
01-01-05-02-01-02-19.mp4	AV	Speech	Angry	Strong	Kids	R2	A19	5	5	1	1
01-01-05-02-01-02-20.mp4	AV	Speech	Angry	Strong	Kids	R2	A20	5	5	1	1
01-01-05-02-01-02-21.mp4	AV	Speech	Angry	Strong	Kids	R2	A21	5	9	1	0
01-01-05-02-01-02-22.mp4	AV	Speech	Angry	Strong	Kids	R2	A22	5	5	1	1
01-01-05-02-01-02-23.mp4	AV	Speech	Angry	Strong	Kids	R2	A23	5	5	1	1
01-01-05-02-01-02-24.mp4	AV	Speech	Angry	Strong	Kids	R2	A24	5	5	1	1
01-01-05-02-02-01-01.mp4	AV	Speech	Angry	Strong	Dogs	R1	A1	5	5	1	1
01-01-05-02-02-01-02.mp4	AV	Speech	Angry	Strong	Dogs	R1	A2	5	5	1	1
01-01-05-02-02-01-03.mp4	AV	Speech	Angry	Strong	Dogs	R1	A3	5	5	1	1
01-01-05-02-02-01-04.mp4	AV	Speech	Angry	Strong	Dogs	R1	A4	5	5	1	1
01-01-05-02-02-01-05.mp4	AV	Speech	Angry	Strong	Dogs	R1	A5	5	5	1	1
01-01-05-02-02-01-06.mp4	AV	Speech	Angry	Strong	Dogs	R1	A6	5	5	1	1
01-01-05-02-02-01-07.mp4	AV	Speech	Angry	Strong	Dogs	R1	A7	5	5	1	1
01-01-05-02-02-01-08.mp4	AV	Speech	Angry	Strong	Dogs	R1	A8	5	5	1	1
01-01-05-02-02-01-09.mp4	AV	Speech	Angry	Strong	Dogs	R1	A9	5	5	1	1
01-01-05-02-02-01-10.mp4	AV	Speech	Angry	Strong	Dogs	R1	A10	5	5	1	1
01-01-05-02-02-01-11.mp4	AV	Speech	Angry	Strong	Dogs	R1	A11	5	5	1	1
01-01-05-02-02-01-12.mp4	AV	Speech	Angry	Strong	Dogs	R1	A12	5	5	1	1
01-01-05-02-02-01-13.mp4	AV	Speech	Angry	Strong	Dogs	R1	A13	5	5	1	1
01-01-05-02-02-01-14.mp4	AV	Speech	Angry	Strong	Dogs	R1	A14	5	5	1	1
01-01-05-02-02-01-15.mp4	AV	Speech	Angry	Strong	Dogs	R1	A15	5	5	1	1
01-01-05-02-02-01-16.mp4	AV	Speech	Angry	Strong	Dogs	R1	A16	5	5	1	1
01-01-05-02-02-01-17.mp4	AV	Speech	Angry	Strong	Dogs	R1	A17	5	5	1	1
01-01-05-02-02-01-18.mp4	AV	Speech	Angry	Strong	Dogs	R1	A18	5	5	1	1
01-01-05-02-02-01-19.mp4	AV	Speech	Angry	Strong	Dogs	R1	A19	5	5	1	1
01-01-05-02-02-01-20.mp4	AV	Speech	Angry	Strong	Dogs	R1	A20	5	5	1	1
01-01-05-02-02-01-21.mp4	AV	Speech	Angry	Strong	Dogs	R1	A21	5	5	1	1
01-01-05-02-02-01-22.mp4	AV	Speech	Angry	Strong	Dogs	R1	A22	5	5	1	1
01-01-05-02-02-01-23.mp4	AV	Speech	Angry	Strong	Dogs	R1	A23	5	5	1	1
01-01-05-02-02-01-24.mp4	AV	Speech	Angry	Strong	Dogs	R1	A24	5	5	1	1
01-01-05-02-02-02-01.mp4	AV	Speech	Angry	Strong	Dogs	R2	A1	6	5	0	1
01-01-05-02-02-02-02.mp4	AV	Speech	Angry	Strong	Dogs	R2	A2	5	5	1	1
01-01-05-02-02-02-03.mp4	AV	Speech	Angry	Strong	Dogs	R2	A3	5	5	1	1
01-01-05-02-02-02-04.mp4	AV	Speech	Angry	Strong	Dogs	R2	A4	5	5	1	1
01-01-05-02-02-02-05.mp4	AV	Speech	Angry	Strong	Dogs	R2	A5	5	5	1	1
01-01-05-02-02-02-06.mp4	AV	Speech	Angry	Strong	Dogs	R2	A6	5	5	1	1
01-01-05-02-02-02-07.mp4	AV	Speech	Angry	Strong	Dogs	R2	A7	5	5	1	1
01-01-05-02-02-02-08.mp4	AV	Speech	Angry	Strong	Dogs	R2	A8	5	5	1	1
01-01-05-02-02-02-09.mp4	AV	Speech	Angry	Strong	Dogs	R2	A9	5	5	1	1
01-01-05-02-02-02-10.mp4	AV	Speech	Angry	Strong	Dogs	R2	A10	7	5	0	1
01-01-05-02-02-02-11.mp4	AV	Speech	Angry	Strong	Dogs	R2	A11	5	5	1	1
01-01-05-02-02-02-12.mp4	AV	Speech	Angry	Strong	Dogs	R2	A12	5	5	1	1
01-01-05-02-02-02-13.mp4	AV	Speech	Angry	Strong	Dogs	R2	A13	5	5	1	1
01-01-05-02-02-02-14.mp4	AV	Speech	Angry	Strong	Dogs	R2	A14	5	5	1	1
01-01-05-02-02-02-15.mp4	AV	Speech	Angry	Strong	Dogs	R2	A15	5	5	1	1
01-01-05-02-02-02-16.mp4	AV	Speech	Angry	Strong	Dogs	R2	A16	5	5	1	1
01-01-05-02-02-02-17.mp4	AV	Speech	Angry	Strong	Dogs	R2	A17	5	5	1	1
01-01-05-02-02-02-18.mp4	AV	Speech	Angry	Strong	Dogs	R2	A18	6	5	0	1
01-01-05-02-02-02-19.mp4	AV	Speech	Angry	Strong	Dogs	R2	A19	5	5	1	1
01-01-05-02-02-02-20.mp4	AV	Speech	Angry	Strong	Dogs	R2	A20	5	5	1	1
01-01-05-02-02-02-21.mp4	AV	Speech	Angry	Strong	Dogs	R2	A21	5	5	1	1
01-01-05-02-02-02-22.mp4	AV	Speech	Angry	Strong	Dogs	R2	A22	5	5	1	1
01-01-05-02-02-02-23.mp4	AV	Speech	Angry	Strong	Dogs	R2	A23	5	5	1	1
01-01-05-02-02-02-24.mp4	AV	Speech	Angry	Strong	Dogs	R2	A24	6	6	0	0
01-01-06-01-01-01-01.mp4	AV	Speech	Fearful	Normal	Kids	R1	A1	4	6	0	1
01-01-06-01-01-01-02.mp4	AV	Speech	Fearful	Normal	Kids	R1	A2	6	6	1	1
01-01-06-01-01-01-03.mp4	AV	Speech	Fearful	Normal	Kids	R1	A3	6	6	1	1
01-01-06-01-01-01-04.mp4	AV	Speech	Fearful	Normal	Kids	R1	A4	6	6	1	1
01-01-06-01-01-01-05.mp4	AV	Speech	Fearful	Normal	Kids	R1	A5	6	6	1	1
01-01-06-01-01-01-06.mp4	AV	Speech	Fearful	Normal	Kids	R1	A6	8	6	0	1
01-01-06-01-01-01-07.mp4	AV	Speech	Fearful	Normal	Kids	R1	A7	6	6	1	1
01-01-06-01-01-01-08.mp4	AV	Speech	Fearful	Normal	Kids	R1	A8	6	6	1	1
01-01-06-01-01-01-09.mp4	AV	Speech	Fearful	Normal	Kids	R1	A9	6	6	1	1
01-01-06-01-01-01-10.mp4	AV	Speech	Fearful	Normal	Kids	R1	A10	6	6	1	1
01-01-06-01-01-01-11.mp4	AV	Speech	Fearful	Normal	Kids	R1	A11	6	6	1	1
01-01-06-01-01-01-12.mp4	AV	Speech	Fearful	Normal	Kids	R1	A12	7	8	0	0
01-01-06-01-01-01-13.mp4	AV	Speech	Fearful	Normal	Kids	R1	A13	5	7	0	0
01-01-06-01-01-01-14.mp4	AV	Speech	Fearful	Normal	Kids	R1	A14	6	6	1	1
01-01-06-01-01-01-15.mp4	AV	Speech	Fearful	Normal	Kids	R1	A15	6	6	1	1
01-01-06-01-01-01-16.mp4	AV	Speech	Fearful	Normal	Kids	R1	A16	6	6	1	1
01-01-06-01-01-01-17.mp4	AV	Speech	Fearful	Normal	Kids	R1	A17	6	6	1	1
01-01-06-01-01-01-18.mp4	AV	Speech	Fearful	Normal	Kids	R1	A18	6	6	1	1
01-01-06-01-01-01-19.mp4	AV	Speech	Fearful	Normal	Kids	R1	A19	6	6	1	1
01-01-06-01-01-01-20.mp4	AV	Speech	Fearful	Normal	Kids	R1	A20	6	8	1	0
01-01-06-01-01-01-21.mp4	AV	Speech	Fearful	Normal	Kids	R1	A21	6	6	1	1
01-01-06-01-01-01-22.mp4	AV	Speech	Fearful	Normal	Kids	R1	A22	6	6	1	1
01-01-06-01-01-01-23.mp4	AV	Speech	Fearful	Normal	Kids	R1	A23	6	6	1	1
01-01-06-01-01-01-24.mp4	AV	Speech	Fearful	Normal	Kids	R1	A24	6	6	1	1
01-01-06-01-01-02-01.mp4	AV	Speech	Fearful	Normal	Kids	R2	A1	6	6	1	1
01-01-06-01-01-02-02.mp4	AV	Speech	Fearful	Normal	Kids	R2	A2	6	6	1	1
01-01-06-01-01-02-03.mp4	AV	Speech	Fearful	Normal	Kids	R2	A3	6	5	1	0
01-01-06-01-01-02-04.mp4	AV	Speech	Fearful	Normal	Kids	R2	A4	6	8	1	0
01-01-06-01-01-02-05.mp4	AV	Speech	Fearful	Normal	Kids	R2	A5	9	6	0	1
01-01-06-01-01-02-06.mp4	AV	Speech	Fearful	Normal	Kids	R2	A6	4	4	0	0
01-01-06-01-01-02-07.mp4	AV	Speech	Fearful	Normal	Kids	R2	A7	6	6	1	1
01-01-06-01-01-02-08.mp4	AV	Speech	Fearful	Normal	Kids	R2	A8	6	6	1	1
01-01-06-01-01-02-09.mp4	AV	Speech	Fearful	Normal	Kids	R2	A9	6	6	1	1
01-01-06-01-01-02-10.mp4	AV	Speech	Fearful	Normal	Kids	R2	A10	6	6	1	1
01-01-06-01-01-02-11.mp4	AV	Speech	Fearful	Normal	Kids	R2	A11	6	6	1	1
01-01-06-01-01-02-12.mp4	AV	Speech	Fearful	Normal	Kids	R2	A12	6	6	1	1
01-01-06-01-01-02-13.mp4	AV	Speech	Fearful	Normal	Kids	R2	A13	5	5	0	0
01-01-06-01-01-02-14.mp4	AV	Speech	Fearful	Normal	Kids	R2	A14	8	6	0	1
01-01-06-01-01-02-15.mp4	AV	Speech	Fearful	Normal	Kids	R2	A15	9	9	0	0
01-01-06-01-01-02-16.mp4	AV	Speech	Fearful	Normal	Kids	R2	A16	6	6	1	1
01-01-06-01-01-02-17.mp4	AV	Speech	Fearful	Normal	Kids	R2	A17	6	6	1	1
01-01-06-01-01-02-18.mp4	AV	Speech	Fearful	Normal	Kids	R2	A18	6	6	1	1
01-01-06-01-01-02-19.mp4	AV	Speech	Fearful	Normal	Kids	R2	A19	6	8	1	0
01-01-06-01-01-02-20.mp4	AV	Speech	Fearful	Normal	Kids	R2	A20	6	6	1	1
01-01-06-01-01-02-21.mp4	AV	Speech	Fearful	Normal	Kids	R2	A21	7	6	0	1
01-01-06-01-01-02-22.mp4	AV	Speech	Fearful	Normal	Kids	R2	A22	6	6	1	1
01-01-06-01-01-02-23.mp4	AV	Speech	Fearful	Normal	Kids	R2	A23	7	6	0	1
01-01-06-01-01-02-24.mp4	AV	Speech	Fearful	Normal	Kids	R2	A24	4	6	0	1
01-01-06-01-02-01-01.mp4	AV	Speech	Fearful	Normal	Dogs	R1	A1	6	6	1	1
01-01-06-01-02-01-02.mp4	AV	Speech	Fearful	Normal	Dogs	R1	A2	6	4	1	0
01-01-06-01-02-01-03.mp4	AV	Speech	Fearful	Normal	Dogs	R1	A3	6	6	1	1
01-01-06-01-02-01-04.mp4	AV	Speech	Fearful	Normal	Dogs	R1	A4	6	6	1	1
01-01-06-01-02-01-05.mp4	AV	Speech	Fearful	Normal	Dogs	R1	A5	6	6	1	1
01-01-06-01-02-01-06.mp4	AV	Speech	Fearful	Normal	Dogs	R1	A6	6	6	1	1
01-01-06-01-02-01-07.mp4	AV	Speech	Fearful	Normal	Dogs	R1	A7	4	6	0	1
01-01-06-01-02-01-08.mp4	AV	Speech	Fearful	Normal	Dogs	R1	A8	8	8	0	0
01-01-06-01-02-01-09.mp4	AV	Speech	Fearful	Normal	Dogs	R1	A9	6	6	1	1
01-01-06-01-02-01-10.mp4	AV	Speech	Fearful	Normal	Dogs	R1	A10	6	6	1	1
01-01-06-01-02-01-11.mp4	AV	Speech	Fearful	Normal	Dogs	R1	A11	9	6	0	1
01-01-06-01-02-01-12.mp4	AV	Speech	Fearful	Normal	Dogs	R1	A12	6	6	1	1
01-01-06-01-02-01-13.mp4	AV	Speech	Fearful	Normal	Dogs	R1	A13	5	5	0	0
01-01-06-01-02-01-14.mp4	AV	Speech	Fearful	Normal	Dogs	R1	A14	6	8	1	0
01-01-06-01-02-01-15.mp4	AV	Speech	Fearful	Normal	Dogs	R1	A15	6	8	1	0
01-01-06-01-02-01-16.mp4	AV	Speech	Fearful	Normal	Dogs	R1	A16	6	6	1	1
01-01-06-01-02-01-17.mp4	AV	Speech	Fearful	Normal	Dogs	R1	A17	6	6	1	1
01-01-06-01-02-01-18.mp4	AV	Speech	Fearful	Normal	Dogs	R1	A18	6	6	1	1
01-01-06-01-02-01-19.mp4	AV	Speech	Fearful	Normal	Dogs	R1	A19	6	6	1	1
01-01-06-01-02-01-20.mp4	AV	Speech	Fearful	Normal	Dogs	R1	A20	4	4	0	0
01-01-06-01-02-01-21.mp4	AV	Speech	Fearful	Normal	Dogs	R1	A21	6	6	1	1
01-01-06-01-02-01-22.mp4	AV	Speech	Fearful	Normal	Dogs	R1	A22	9	9	0	0
01-01-06-01-02-01-23.mp4	AV	Speech	Fearful	Normal	Dogs	R1	A23	6	6	1	1
01-01-06-01-02-01-24.mp4	AV	Speech	Fearful	Normal	Dogs	R1	A24	6	6	1	1
01-01-06-01-02-02-01.mp4	AV	Speech	Fearful	Normal	Dogs	R2	A1	4	8	0	0
01-01-06-01-02-02-02.mp4	AV	Speech	Fearful	Normal	Dogs	R2	A2	6	6	1	1
01-01-06-01-02-02-03.mp4	AV	Speech	Fearful	Normal	Dogs	R2	A3	6	6	1	1
01-01-06-01-02-02-04.mp4	AV	Speech	Fearful	Normal	Dogs	R2	A4	8	6	0	1
01-01-06-01-02-02-05.mp4	AV	Speech	Fearful	Normal	Dogs	R2	A5	9	6	0	1
01-01-06-01-02-02-06.mp4	AV	Speech	Fearful	Normal	Dogs	R2	A6	6	6	1	1
01-01-06-01-02-02-07.mp4	AV	Speech	Fearful	Normal	Dogs	R2	A7	6	6	1	1
01-01-06-01-02-02-08.mp4	AV	Speech	Fearful	Normal	Dogs	R2	A8	6	6	1	1
01-01-06-01-02-02-09.mp4	AV	Speech	Fearful	Normal	Dogs	R2	A9	6	6	1	1
01-01-06-01-02-02-10.mp4	AV	Speech	Fearful	Normal	Dogs	R2	A10	6	6	1	1
01-01-06-01-02-02-11.mp4	AV	Speech	Fearful	Normal	Dogs	R2	A11	6	6	1	1
01-01-06-01-02-02-12.mp4	AV	Speech	Fearful	Normal	Dogs	R2	A12	6	6	1	1
01-01-06-01-02-02-13.mp4	AV	Speech	Fearful	Normal	Dogs	R2	A13	5	5	0	0
01-01-06-01-02-02-14.mp4	AV	Speech	Fearful	Normal	Dogs	R2	A14	6	6	1	1
01-01-06-01-02-02-15.mp4	AV	Speech	Fearful	Normal	Dogs	R2	A15	6	6	1	1
01-01-06-01-02-02-16.mp4	AV	Speech	Fearful	Normal	Dogs	R2	A16	6	4	1	0
01-01-06-01-02-02-17.mp4	AV	Speech	Fearful	Normal	Dogs	R2	A17	8	6	0	1
01-01-06-01-02-02-18.mp4	AV	Speech	Fearful	Normal	Dogs	R2	A18	6	6	1	1
01-01-06-01-02-02-19.mp4	AV	Speech	Fearful	Normal	Dogs	R2	A19	6	6	1	1
01-01-06-01-02-02-20.mp4	AV	Speech	Fearful	Normal	Dogs	R2	A20	6	6	1	1
01-01-06-01-02-02-21.mp4	AV	Speech	Fearful	Normal	Dogs	R2	A21	6	6	1	1
01-01-06-01-02-02-22.mp4	AV	Speech	Fearful	Normal	Dogs	R2	A22	9	9	0	0
01-01-06-01-02-02-23.mp4	AV	Speech	Fearful	Normal	Dogs	R2	A23	6	6	1	1
01-01-06-01-02-02-24.mp4	AV	Speech	Fearful	Normal	Dogs	R2	A24	6	5	1	0
01-01-06-02-01-01-01.mp4	AV	Speech	Fearful	Strong	Kids	R1	A1	6	6	1	1
01-01-06-02-01-01-02.mp4	AV	Speech	Fearful	Strong	Kids	R1	A2	6	5	1	0
01-01-06-02-01-01-03.mp4	AV	Speech	Fearful	Strong	Kids	R1	A3	6	6	1	1
01-01-06-02-01-01-04.mp4	AV	Speech	Fearful	Strong	Kids	R1	A4	6	6	1	1
01-01-06-02-01-01-05.mp4	AV	Speech	Fearful	Strong	Kids	R1	A5	6	6	1	1
01-01-06-02-01-01-06.mp4	AV	Speech	Fearful	Strong	Kids	R1	A6	6	6	1	1
01-01-06-02-01-01-07.mp4	AV	Speech	Fearful	Strong	Kids	R1	A7	8	6	0	1
01-01-06-02-01-01-08.mp4	AV	Speech	Fearful	Strong	Kids	R1	A8	6	4	1	0
01-01-06-02-01-01-09.mp4	AV	Speech	Fearful	Strong	Kids	R1	A9	6	6	1	1
01-01-06-02-01-01-10.mp4	AV	Speech	Fearful	Strong	Kids	R1	A10	6	6	1	1
01-01-06-02-01-01-11.mp4	AV	Speech	Fearful	Strong	Kids	R1	A11	8	6	0	1
01-01-06-02-01-01-12.mp4	AV	Speech	Fearful	Strong	Kids	R1	A12	6	6	1	1
01-01-06-02-01-01-13.mp4	AV	Speech	Fearful	Strong	Kids	R1	A13	4	5	0	0
01-01-06-02-01-01-14.mp4	AV	Speech	Fearful	Strong	Kids	R1	A14	6	6	1	1
01-01-06-02-01-01-15.mp4	AV	Speech	Fearful	Strong	Kids	R1	A15	6	6	1	1
01-01-06-02-01-01-16.mp4	AV	Speech	Fearful	Strong	Kids	R1	A16	6	6	1	1
01-01-06-02-01-01-17.mp4	AV	Speech	Fearful	Strong	Kids	R1	A17	9	9	0	0
01-01-06-02-01-01-18.mp4	AV	Speech	Fearful	Strong	Kids	R1	A18	6	6	1	1
01-01-06-02-01-01-19.mp4	AV	Speech	Fearful	Strong	Kids	R1	A19	4	6	0	1
01-01-06-02-01-01-20.mp4	AV	Speech	Fearful	Strong	Kids	R1	A20	6	6	1	1
01-01-06-02-01-01-21.mp4	AV	Speech	Fearful	Strong	Kids	R1	A21	8	8	0	0
01-01-06-02-01-01-22.mp4	AV	Speech	Fearful	Strong	Kids	R1	A22	6	6	1	1
01-01-06-02-01-01-23.mp4	AV	Speech	Fearful	Strong	Kids	R1	A23	6	6	1	1
01-01-06-02-01-01-24.mp4	AV	Speech	Fearful	Strong	Kids	R1	A24	6	6	1	1
01-01-06-02-01-02-01.mp4	AV	Speech	Fearful	Strong	Kids	R2	A1	1	6	0	1
01-01-06-02-01-02-02.mp4	AV	Speech	Fearful	Strong	Kids	R2	A2	6	6	1	1
01-01-06-02-01-02-03.mp4	AV	Speech	Fearful	Strong	Kids	R2	A3	6	6	1	1
01-01-06-02-01-02-04.mp4	AV	Speech	Fearful	Strong	Kids	R2	A4	6	6	1	1
01-01-06-02-01-02-05.mp4	AV	Speech	Fearful	Strong	Kids	R2	A5	6	6	1	1
01-01-06-02-01-02-06.mp4	AV	Speech	Fearful	Strong	Kids	R2	A6	6	6	1	1
01-01-06-02-01-02-07.mp4	AV	Speech	Fearful	Strong	Kids	R2	A7	6	6	1	1
01-01-06-02-01-02-08.mp4	AV	Speech	Fearful	Strong	Kids	R2	A8	6	6	1	1
01-01-06-02-01-02-09.mp4	AV	Speech	Fearful	Strong	Kids	R2	A9	6	6	1	1
01-01-06-02-01-02-10.mp4	AV	Speech	Fearful	Strong	Kids	R2	A10	8	6	0	1
01-01-06-02-01-02-11.mp4	AV	Speech	Fearful	Strong	Kids	R2	A11	6	6	1	1
01-01-06-02-01-02-12.mp4	AV	Speech	Fearful	Strong	Kids	R2	A12	6	8	1	0
01-01-06-02-01-02-13.mp4	AV	Speech	Fearful	Strong	Kids	R2	A13	8	6	0	1
01-01-06-02-01-02-14.mp4	AV	Speech	Fearful	Strong	Kids	R2	A14	6	6	1	1
01-01-06-02-01-02-15.mp4	AV	Speech	Fearful	Strong	Kids	R2	A15	6	6	1	1
01-01-06-02-01-02-16.mp4	AV	Speech	Fearful	Strong	Kids	R2	A16	6	6	1	1
01-01-06-02-01-02-17.mp4	AV	Speech	Fearful	Strong	Kids	R2	A17	6	6	1	1
01-01-06-02-01-02-18.mp4	AV	Speech	Fearful	Strong	Kids	R2	A18	6	6	1	1
01-01-06-02-01-02-19.mp4	AV	Speech	Fearful	Strong	Kids	R2	A19	6	6	1	1
01-01-06-02-01-02-20.mp4	AV	Speech	Fearful	Strong	Kids	R2	A20	6	6	1	1
01-01-06-02-01-02-21.mp4	AV	Speech	Fearful	Strong	Kids	R2	A21	6	6	1	1
01-01-06-02-01-02-22.mp4	AV	Speech	Fearful	Strong	Kids	R2	A22	6	4	1	0
01-01-06-02-01-02-23.mp4	AV	Speech	Fearful	Strong	Kids	R2	A23	6	6	1	1
01-01-06-02-01-02-24.mp4	AV	Speech	Fearful	Strong	Kids	R2	A24	6	6	1	1
01-01-06-02-02-01-01.mp4	AV	Speech	Fearful	Strong	Dogs	R1	A1	6	6	1	1
01-01-06-02-02-01-02.mp4	AV	Speech	Fearful	Strong	Dogs	R1	A2	6	6	1	1
01-01-06-02-02-01-03.mp4	AV	Speech	Fearful	Strong	Dogs	R1	A3	6	6	1	1
01-01-06-02-02-01-04.mp4	AV	Speech	Fearful	Strong	Dogs	R1	A4	6	6	1	1
01-01-06-02-02-01-05.mp4	AV	Speech	Fearful	Strong	Dogs	R1	A5	6	6	1	1
01-01-06-02-02-01-06.mp4	AV	Speech	Fearful	Strong	Dogs	R1	A6	6	6	1	1
01-01-06-02-02-01-07.mp4	AV	Speech	Fearful	Strong	Dogs	R1	A7	6	6	1	1
01-01-06-02-02-01-08.mp4	AV	Speech	Fearful	Strong	Dogs	R1	A8	6	6	1	1
01-01-06-02-02-01-09.mp4	AV	Speech	Fearful	Strong	Dogs	R1	A9	6	6	1	1
01-01-06-02-02-01-10.mp4	AV	Speech	Fearful	Strong	Dogs	R1	A10	6	6	1	1
01-01-06-02-02-01-11.mp4	AV	Speech	Fearful	Strong	Dogs	R1	A11	6	6	1	1
01-01-06-02-02-01-12.mp4	AV	Speech	Fearful	Strong	Dogs	R1	A12	6	6	1	1
01-01-06-02-02-01-13.mp4	AV	Speech	Fearful	Strong	Dogs	R1	A13	5	5	0	0
01-01-06-02-02-01-14.mp4	AV	Speech	Fearful	Strong	Dogs	R1	A14	6	6	1	1
01-01-06-02-02-01-15.mp4	AV	Speech	Fearful	Strong	Dogs	R1	A15	6	6	1	1
01-01-06-02-02-01-16.mp4	AV	Speech	Fearful	Strong	Dogs	R1	A16	6	6	1	1
01-01-06-02-02-01-17.mp4	AV	Speech	Fearful	Strong	Dogs	R1	A17	6	6	1	1
01-01-06-02-02-01-18.mp4	AV	Speech	Fearful	Strong	Dogs	R1	A18	6	6	1	1
01-01-06-02-02-01-19.mp4	AV	Speech	Fearful	Strong	Dogs	R1	A19	6	6	1	1
01-01-06-02-02-01-20.mp4	AV	Speech	Fearful	Strong	Dogs	R1	A20	6	6	1	1
01-01-06-02-02-01-21.mp4	AV	Speech	Fearful	Strong	Dogs	R1	A21	5	6	0	1
01-01-06-02-02-01-22.mp4	AV	Speech	Fearful	Strong	Dogs	R1	A22	6	6	1	1
01-01-06-02-02-01-23.mp4	AV	Speech	Fearful	Strong	Dogs	R1	A23	8	6	0	1
01-01-06-02-02-01-24.mp4	AV	Speech	Fearful	Strong	Dogs	R1	A24	6	6	1	1
01-01-06-02-02-02-01.mp4	AV	Speech	Fearful	Strong	Dogs	R2	A1	6	6	1	1
01-01-06-02-02-02-02.mp4	AV	Speech	Fearful	Strong	Dogs	R2	A2	6	6	1	1
01-01-06-02-02-02-03.mp4	AV	Speech	Fearful	Strong	Dogs	R2	A3	6	6	1	1
01-01-06-02-02-02-04.mp4	AV	Speech	Fearful	Strong	Dogs	R2	A4	6	6	1	1
01-01-06-02-02-02-05.mp4	AV	Speech	Fearful	Strong	Dogs	R2	A5	6	6	1	1
01-01-06-02-02-02-06.mp4	AV	Speech	Fearful	Strong	Dogs	R2	A6	5	5	0	0
01-01-06-02-02-02-07.mp4	AV	Speech	Fearful	Strong	Dogs	R2	A7	6	6	1	1
01-01-06-02-02-02-08.mp4	AV	Speech	Fearful	Strong	Dogs	R2	A8	6	6	1	1
01-01-06-02-02-02-09.mp4	AV	Speech	Fearful	Strong	Dogs	R2	A9	6	6	1	1
01-01-06-02-02-02-10.mp4	AV	Speech	Fearful	Strong	Dogs	R2	A10	6	6	1	1
01-01-06-02-02-02-11.mp4	AV	Speech	Fearful	Strong	Dogs	R2	A11	6	6	1	1
01-01-06-02-02-02-12.mp4	AV	Speech	Fearful	Strong	Dogs	R2	A12	6	6	1	1
01-01-06-02-02-02-13.mp4	AV	Speech	Fearful	Strong	Dogs	R2	A13	2	2	0	0
01-01-06-02-02-02-14.mp4	AV	Speech	Fearful	Strong	Dogs	R2	A14	6	8	1	0
01-01-06-02-02-02-15.mp4	AV	Speech	Fearful	Strong	Dogs	R2	A15	6	6	1	1
01-01-06-02-02-02-16.mp4	AV	Speech	Fearful	Strong	Dogs	R2	A16	6	6	1	1
01-01-06-02-02-02-17.mp4	AV	Speech	Fearful	Strong	Dogs	R2	A17	8	8	0	0
01-01-06-02-02-02-18.mp4	AV	Speech	Fearful	Strong	Dogs	R2	A18	4	4	0	0
01-01-06-02-02-02-19.mp4	AV	Speech	Fearful	Strong	Dogs	R2	A19	6	6	1	1
01-01-06-02-02-02-20.mp4	AV	Speech	Fearful	Strong	Dogs	R2	A20	6	6	1	1
01-01-06-02-02-02-21.mp4	AV	Speech	Fearful	Strong	Dogs	R2	A21	8	4	0	0
01-01-06-02-02-02-22.mp4	AV	Speech	Fearful	Strong	Dogs	R2	A22	6	6	1	1
01-01-06-02-02-02-23.mp4	AV	Speech	Fearful	Strong	Dogs	R2	A23	6	6	1	1
01-01-06-02-02-02-24.mp4	AV	Speech	Fearful	Strong	Dogs	R2	A24	6	6	1	1
01-01-07-01-01-01-01.mp4	AV	Speech	Disgust	Normal	Kids	R1	A1	7	7	1	1
01-01-07-01-01-01-02.mp4	AV	Speech	Disgust	Normal	Kids	R1	A2	7	7	1	1
01-01-07-01-01-01-03.mp4	AV	Speech	Disgust	Normal	Kids	R1	A3	7	7	1	1
01-01-07-01-01-01-04.mp4	AV	Speech	Disgust	Normal	Kids	R1	A4	7	7	1	1
01-01-07-01-01-01-05.mp4	AV	Speech	Disgust	Normal	Kids	R1	A5	7	7	1	1
01-01-07-01-01-01-06.mp4	AV	Speech	Disgust	Normal	Kids	R1	A6	7	7	1	1
01-01-07-01-01-01-07.mp4	AV	Speech	Disgust	Normal	Kids	R1	A7	7	7	1	1
01-01-07-01-01-01-08.mp4	AV	Speech	Disgust	Normal	Kids	R1	A8	7	7	1	1
01-01-07-01-01-01-09.mp4	AV	Speech	Disgust	Normal	Kids	R1	A9	7	7	1	1
01-01-07-01-01-01-10.mp4	AV	Speech	Disgust	Normal	Kids	R1	A10	7	7	1	1
01-01-07-01-01-01-11.mp4	AV	Speech	Disgust	Normal	Kids	R1	A11	7	7	1	1
01-01-07-01-01-01-12.mp4	AV	Speech	Disgust	Normal	Kids	R1	A12	9	9	0	0
01-01-07-01-01-01-13.mp4	AV	Speech	Disgust	Normal	Kids	R1	A13	7	7	1	1
01-01-07-01-01-01-14.mp4	AV	Speech	Disgust	Normal	Kids	R1	A14	7	7	1	1
01-01-07-01-01-01-15.mp4	AV	Speech	Disgust	Normal	Kids	R1	A15	4	4	0	0
01-01-07-01-01-01-16.mp4	AV	Speech	Disgust	Normal	Kids	R1	A16	7	7	1	1
01-01-07-01-01-01-17.mp4	AV	Speech	Disgust	Normal	Kids	R1	A17	7	7	1	1
01-01-07-01-01-01-18.mp4	AV	Speech	Disgust	Normal	Kids	R1	A18	7	7	1	1
01-01-07-01-01-01-19.mp4	AV	Speech	Disgust	Normal	Kids	R1	A19	7	7	1	1
01-01-07-01-01-01-20.mp4	AV	Speech	Disgust	Normal	Kids	R1	A20	7	5	1	0
01-01-07-01-01-01-21.mp4	AV	Speech	Disgust	Normal	Kids	R1	A21	7	7	1	1
01-01-07-01-01-01-22.mp4	AV	Speech	Disgust	Normal	Kids	R1	A22	5	7	0	1
01-01-07-01-01-01-23.mp4	AV	Speech	Disgust	Normal	Kids	R1	A23	7	7	1	1
01-01-07-01-01-01-24.mp4	AV	Speech	Disgust	Normal	Kids	R1	A24	7	9	1	0
01-01-07-01-01-02-01.mp4	AV	Speech	Disgust	Normal	Kids	R2	A1	7	7	1	1
01-01-07-01-01-02-02.mp4	AV	Speech	Disgust	Normal	Kids	R2	A2	7	7	1	1
01-01-07-01-01-02-03.mp4	AV	Speech	Disgust	Normal	Kids	R2	A3	7	7	1	1
01-01-07-01-01-02-04.mp4	AV	Speech	Disgust	Normal	Kids	R2	A4	7	7	1	1
01-01-07-01-01-02-05.mp4	AV	Speech	Disgust	Normal	Kids	R2	A5	7	7	1	1
01-01-07-01-01-02-06.mp4	AV	Speech	Disgust	Normal	Kids	R2	A6	7	7	1	1
01-01-07-01-01-02-07.mp4	AV	Speech	Disgust	Normal	Kids	R2	A7	7	7	1	1
01-01-07-01-01-02-08.mp4	AV	Speech	Disgust	Normal	Kids	R2	A8	7	7	1	1
01-01-07-01-01-02-09.mp4	AV	Speech	Disgust	Normal	Kids	R2	A9	7	7	1	1
01-01-07-01-01-02-10.mp4	AV	Speech	Disgust	Normal	Kids	R2	A10	7	7	1	1
01-01-07-01-01-02-11.mp4	AV	Speech	Disgust	Normal	Kids	R2	A11	7	7	1	1
01-01-07-01-01-02-12.mp4	AV	Speech	Disgust	Normal	Kids	R2	A12	7	7	1	1
01-01-07-01-01-02-13.mp4	AV	Speech	Disgust	Normal	Kids	R2	A13	7	7	1	1
01-01-07-01-01-02-14.mp4	AV	Speech	Disgust	Normal	Kids	R2	A14	1	7	0	1
01-01-07-01-01-02-15.mp4	AV	Speech	Disgust	Normal	Kids	R2	A15	7	7	1	1
01-01-07-01-01-02-16.mp4	AV	Speech	Disgust	Normal	Kids	R2	A16	7	7	1	1
01-01-07-01-01-02-17.mp4	AV	Speech	Disgust	Normal	Kids	R2	A17	5	5	0	0
01-01-07-01-01-02-18.mp4	AV	Speech	Disgust	Normal	Kids	R2	A18	7	7	1	1
01-01-07-01-01-02-19.mp4	AV	Speech	Disgust	Normal	Kids	R2	A19	7	7	1	1
01-01-07-01-01-02-20.mp4	AV	Speech	Disgust	Normal	Kids	R2	A20	7	7	1	1
01-01-07-01-01-02-21.mp4	AV	Speech	Disgust	Normal	Kids	R2	A21	7	7	1	1
01-01-07-01-01-02-22.mp4	AV	Speech	Disgust	Normal	Kids	R2	A22	7	7	1	1
01-01-07-01-01-02-23.mp4	AV	Speech	Disgust	Normal	Kids	R2	A23	7	7	1	1
01-01-07-01-01-02-24.mp4	AV	Speech	Disgust	Normal	Kids	R2	A24	7	7	1	1
01-01-07-01-02-01-01.mp4	AV	Speech	Disgust	Normal	Dogs	R1	A1	7	7	1	1
01-01-07-01-02-01-02.mp4	AV	Speech	Disgust	Normal	Dogs	R1	A2	7	7	1	1
01-01-07-01-02-01-03.mp4	AV	Speech	Disgust	Normal	Dogs	R1	A3	7	7	1	1
01-01-07-01-02-01-04.mp4	AV	Speech	Disgust	Normal	Dogs	R1	A4	7	7	1	1
01-01-07-01-02-01-05.mp4	AV	Speech	Disgust	Normal	Dogs	R1	A5	7	7	1	1
01-01-07-01-02-01-06.mp4	AV	Speech	Disgust	Normal	Dogs	R1	A6	7	7	1	1
01-01-07-01-02-01-07.mp4	AV	Speech	Disgust	Normal	Dogs	R1	A7	7	7	1	1
01-01-07-01-02-01-08.mp4	AV	Speech	Disgust	Normal	Dogs	R1	A8	7	7	1	1
01-01-07-01-02-01-09.mp4	AV	Speech	Disgust	Normal	Dogs	R1	A9	7	7	1	1
01-01-07-01-02-01-10.mp4	AV	Speech	Disgust	Normal	Dogs	R1	A10	7	7	1	1
01-01-07-01-02-01-11.mp4	AV	Speech	Disgust	Normal	Dogs	R1	A11	7	7	1	1
01-01-07-01-02-01-12.mp4	AV	Speech	Disgust	Normal	Dogs	R1	A12	7	7	1	1
01-01-07-01-02-01-13.mp4	AV	Speech	Disgust	Normal	Dogs	R1	A13	5	7	0	1
01-01-07-01-02-01-14.mp4	AV	Speech	Disgust	Normal	Dogs	R1	A14	7	7	1	1
01-01-07-01-02-01-15.mp4	AV	Speech	Disgust	Normal	Dogs	R1	A15	7	7	1	1
01-01-07-01-02-01-16.mp4	AV	Speech	Disgust	Normal	Dogs	R1	A16	7	7	1	1
01-01-07-01-02-01-17.mp4	AV	Speech	Disgust	Normal	Dogs	R1	A17	7	7	1	1
01-01-07-01-02-01-18.mp4	AV	Speech	Disgust	Normal	Dogs	R1	A18	7	7	1	1
01-01-07-01-02-01-19.mp4	AV	Speech	Disgust	Normal	Dogs	R1	A19	7	7	1	1
01-01-07-01-02-01-20.mp4	AV	Speech	Disgust	Normal	Dogs	R1	A20	7	7	1	1
01-01-07-01-02-01-21.mp4	AV	Speech	Disgust	Normal	Dogs	R1	A21	7	8	1	0
01-01-07-01-02-01-22.mp4	AV	Speech	Disgust	Normal	Dogs	R1	A22	7	7	1	1
01-01-07-01-02-01-23.mp4	AV	Speech	Disgust	Normal	Dogs	R1	A23	7	7	1	1
01-01-07-01-02-01-24.mp4	AV	Speech	Disgust	Normal	Dogs	R1	A24	4	7	0	1
01-01-07-01-02-02-01.mp4	AV	Speech	Disgust	Normal	Dogs	R2	A1	7	7	1	1
01-01-07-01-02-02-02.mp4	AV	Speech	Disgust	Normal	Dogs	R2	A2	7	7	1	1
01-01-07-01-02-02-03.mp4	AV	Speech	Disgust	Normal	Dogs	R2	A3	7	7	1	1
01-01-07-01-02-02-04.mp4	AV	Speech	Disgust	Normal	Dogs	R2	A4	7	8	1	0
01-01-07-01-02-02-05.mp4	AV	Speech	Disgust	Normal	Dogs	R2	A5	4	7	0	1
01-01-07-01-02-02-06.mp4	AV	Speech	Disgust	Normal	Dogs	R2	A6	7	7	1	1
01-01-07-01-02-02-07.mp4	AV	Speech	Disgust	Normal	Dogs	R2	A7	7	7	1	1
01-01-07-01-02-02-08.mp4	AV	Speech	Disgust	Normal	Dogs	R2	A8	7	7	1	1
01-01-07-01-02-02-09.mp4	AV	Speech	Disgust	Normal	Dogs	R2	A9	7	7	1	1
01-01-07-01-02-02-10.mp4	AV	Speech	Disgust	Normal	Dogs	R2	A10	7	7	1	1
01-01-07-01-02-02-11.mp4	AV	Speech	Disgust	Normal	Dogs	R2	A11	7	7	1	1
01-01-07-01-02-02-12.mp4	AV	Speech	Disgust	Normal	Dogs	R2	A12	7	7	1	1
01-01-07-01-02-02-13.mp4	AV	Speech	Disgust	Normal	Dogs	R2	A13	7	7	1	1
01-01-07-01-02-02-14.mp4	AV	Speech	Disgust	Normal	Dogs	R2	A14	8	8	0	0
01-01-07-01-02-02-15.mp4	AV	Speech	Disgust	Normal	Dogs	R2	A15	7	7	1	1
01-01-07-01-02-02-16.mp4	AV	Speech	Disgust	Normal	Dogs	R2	A16	7	7	1	1
01-01-07-01-02-02-17.mp4	AV	Speech	Disgust	Normal	Dogs	R2	A17	7	7	1	1
01-01-07-01-02-02-18.mp4	AV	Speech	Disgust	Normal	Dogs	R2	A18	7	6	1	0
01-01-07-01-02-02-19.mp4	AV	Speech	Disgust	Normal	Dogs	R2	A19	7	9	1	0
01-01-07-01-02-02-20.mp4	AV	Speech	Disgust	Normal	Dogs	R2	A20	7	7	1	1
01-01-07-01-02-02-21.mp4	AV	Speech	Disgust	Normal	Dogs	R2	A21	7	5	1	0
01-01-07-01-02-02-22.mp4	AV	Speech	Disgust	Normal	Dogs	R2	A22	7	7	1	1
01-01-07-01-02-02-23.mp4	AV	Speech	Disgust	Normal	Dogs	R2	A23	7	7	1	1
01-01-07-01-02-02-24.mp4	AV	Speech	Disgust	Normal	Dogs	R2	A24	7	7	1	1
01-01-07-02-01-01-01.mp4	AV	Speech	Disgust	Strong	Kids	R1	A1	5	7	0	1
01-01-07-02-01-01-02.mp4	AV	Speech	Disgust	Strong	Kids	R1	A2	7	7	1	1
01-01-07-02-01-01-03.mp4	AV	Speech	Disgust	Strong	Kids	R1	A3	7	7	1	1
01-01-07-02-01-01-04.mp4	AV	Speech	Disgust	Strong	Kids	R1	A4	7	7	1	1
01-01-07-02-01-01-05.mp4	AV	Speech	Disgust	Strong	Kids	R1	A5	7	7	1	1
01-01-07-02-01-01-06.mp4	AV	Speech	Disgust	Strong	Kids	R1	A6	7	7	1	1
01-01-07-02-01-01-07.mp4	AV	Speech	Disgust	Strong	Kids	R1	A7	7	7	1	1
01-01-07-02-01-01-08.mp4	AV	Speech	Disgust	Strong	Kids	R1	A8	7	7	1	1
01-01-07-02-01-01-09.mp4	AV	Speech	Disgust	Strong	Kids	R1	A9	4	7	0	1
01-01-07-02-01-01-10.mp4	AV	Speech	Disgust	Strong	Kids	R1	A10	7	7	1	1
01-01-07-02-01-01-11.mp4	AV	Speech	Disgust	Strong	Kids	R1	A11	7	7	1	1
01-01-07-02-01-01-12.mp4	AV	Speech	Disgust	Strong	Kids	R1	A12	7	7	1	1
01-01-07-02-01-01-13.mp4	AV	Speech	Disgust	Strong	Kids	R1	A13	7	7	1	1
01-01-07-02-01-01-14.mp4	AV	Speech	Disgust	Strong	Kids	R1	A14	7	7	1	1
01-01-07-02-01-01-15.mp4	AV	Speech	Disgust	Strong	Kids	R1	A15	7	7	1	1
01-01-07-02-01-01-16.mp4	AV	Speech	Disgust	Strong	Kids	R1	A16	5	5	0	0
01-01-07-02-01-01-17.mp4	AV	Speech	Disgust	Strong	Kids	R1	A17	7	7	1	1
01-01-07-02-01-01-18.mp4	AV	Speech	Disgust	Strong	Kids	R1	A18	7	7	1	1
01-01-07-02-01-01-19.mp4	AV	Speech	Disgust	Strong	Kids	R1	A19	4	7	0	1
01-01-07-02-01-01-20.mp4	AV	Speech	Disgust	Strong	Kids	R1	A20	7	7	1	1
01-01-07-02-01-01-21.mp4	AV	Speech	Disgust	Strong	Kids	R1	A21	7	7	1	1
01-01-07-02-01-01-22.mp4	AV	Speech	Disgust	Strong	Kids	R1	A22	7	7	1	1
01-01-07-02-01-01-23.mp4	AV	Speech	Disgust	Strong	Kids	R1	A23	7	7	1	1
01-01-07-02-01-01-24.mp4	AV	Speech	Disgust	Strong	Kids	R1	A24	7	7	1	1
01-01-07-02-01-02-01.mp4	AV	Speech	Disgust	Strong	Kids	R2	A1	7	7	1	1
01-01-07-02-01-02-02.mp4	AV	Speech	Disgust	Strong	Kids	R2	A2	7	7	1	1
01-01-07-02-01-02-03.mp4	AV	Speech	Disgust	Strong	Kids	R2	A3	7	7	1	1
01-01-07-02-01-02-04.mp4	AV	Speech	Disgust	Strong	Kids	R2	A4	7	7	1	1
01-01-07-02-01-02-05.mp4	AV	Speech	Disgust	Strong	Kids	R2	A5	7	7	1	1
01-01-07-02-01-02-06.mp4	AV	Speech	Disgust	Strong	Kids	R2	A6	7	7	1	1
01-01-07-02-01-02-07.mp4	AV	Speech	Disgust	Strong	Kids	R2	A7	7	7	1	1
01-01-07-02-01-02-08.mp4	AV	Speech	Disgust	Strong	Kids	R2	A8	7	7	1	1
01-01-07-02-01-02-09.mp4	AV	Speech	Disgust	Strong	Kids	R2	A9	7	7	1	1
01-01-07-02-01-02-10.mp4	AV	Speech	Disgust	Strong	Kids	R2	A10	7	7	1	1
01-01-07-02-01-02-11.mp4	AV	Speech	Disgust	Strong	Kids	R2	A11	7	7	1	1
01-01-07-02-01-02-12.mp4	AV	Speech	Disgust	Strong	Kids	R2	A12	7	7	1	1
01-01-07-02-01-02-13.mp4	AV	Speech	Disgust	Strong	Kids	R2	A13	8	7	0	1
01-01-07-02-01-02-14.mp4	AV	Speech	Disgust	Strong	Kids	R2	A14	7	6	1	0
01-01-07-02-01-02-15.mp4	AV	Speech	Disgust	Strong	Kids	R2	A15	7	7	1	1
01-01-07-02-01-02-16.mp4	AV	Speech	Disgust	Strong	Kids	R2	A16	7	7	1	1
01-01-07-02-01-02-17.mp4	AV	Speech	Disgust	Strong	Kids	R2	A17	7	7	1	1
01-01-07-02-01-02-18.mp4	AV	Speech	Disgust	Strong	Kids	R2	A18	7	7	1	1
01-01-07-02-01-02-19.mp4	AV	Speech	Disgust	Strong	Kids	R2	A19	7	7	1	1
01-01-07-02-01-02-20.mp4	AV	Speech	Disgust	Strong	Kids	R2	A20	4	4	0	0
01-01-07-02-01-02-21.mp4	AV	Speech	Disgust	Strong	Kids	R2	A21	7	7	1	1
01-01-07-02-01-02-22.mp4	AV	Speech	Disgust	Strong	Kids	R2	A22	7	7	1	1
01-01-07-02-01-02-23.mp4	AV	Speech	Disgust	Strong	Kids	R2	A23	7	7	1	1
01-01-07-02-01-02-24.mp4	AV	Speech	Disgust	Strong	Kids	R2	A24	7	7	1	1
01-01-07-02-02-01-01.mp4	AV	Speech	Disgust	Strong	Dogs	R1	A1	7	7	1	1
01-01-07-02-02-01-02.mp4	AV	Speech	Disgust	Strong	Dogs	R1	A2	7	7	1	1
01-01-07-02-02-01-03.mp4	AV	Speech	Disgust	Strong	Dogs	R1	A3	7	7	1	1
01-01-07-02-02-01-04.mp4	AV	Speech	Disgust	Strong	Dogs	R1	A4	7	7	1	1
01-01-07-02-02-01-05.mp4	AV	Speech	Disgust	Strong	Dogs	R1	A5	4	7	0	1
01-01-07-02-02-01-06.mp4	AV	Speech	Disgust	Strong	Dogs	R1	A6	7	7	1	1
01-01-07-02-02-01-07.mp4	AV	Speech	Disgust	Strong	Dogs	R1	A7	7	7	1	1
01-01-07-02-02-01-08.mp4	AV	Speech	Disgust	Strong	Dogs	R1	A8	7	7	1	1
01-01-07-02-02-01-09.mp4	AV	Speech	Disgust	Strong	Dogs	R1	A9	7	4	1	0
01-01-07-02-02-01-10.mp4	AV	Speech	Disgust	Strong	Dogs	R1	A10	7	7	1	1
01-01-07-02-02-01-11.mp4	AV	Speech	Disgust	Strong	Dogs	R1	A11	7	7	1	1
01-01-07-02-02-01-12.mp4	AV	Speech	Disgust	Strong	Dogs	R1	A12	7	7	1	1
01-01-07-02-02-01-13.mp4	AV	Speech	Disgust	Strong	Dogs	R1	A13	4	7	0	1
01-01-07-02-02-01-14.mp4	AV	Speech	Disgust	Strong	Dogs	R1	A14	5	5	0	0
01-01-07-02-02-01-15.mp4	AV	Speech	Disgust	Strong	Dogs	R1	A15	7	7	1	1
01-01-07-02-02-01-16.mp4	AV	Speech	Disgust	Strong	Dogs	R1	A16	7	7	1	1
01-01-07-02-02-01-17.mp4	AV	Speech	Disgust	Strong	Dogs	R1	A17	7	7	1	1
01-01-07-02-02-01-18.mp4	AV	Speech	Disgust	Strong	Dogs	R1	A18	7	7	1	1
01-01-07-02-02-01-19.mp4	AV	Speech	Disgust	Strong	Dogs	R1	A19	5	5	0	0
01-01-07-02-02-01-20.mp4	AV	Speech	Disgust	Strong	Dogs	R1	A20	5	5	0	0
01-01-07-02-02-01-21.mp4	AV	Speech	Disgust	Strong	Dogs	R1	A21	7	7	1	1
01-01-07-02-02-01-22.mp4	AV	Speech	Disgust	Strong	Dogs	R1	A22	7	7	1	1
01-01-07-02-02-01-23.mp4	AV	Speech	Disgust	Strong	Dogs	R1	A23	7	7	1	1
01-01-07-02-02-01-24.mp4	AV	Speech	Disgust	Strong	Dogs	R1	A24	7	7	1	1
01-01-07-02-02-02-01.mp4	AV	Speech	Disgust	Strong	Dogs	R2	A1	3	7	0	1
01-01-07-02-02-02-02.mp4	AV	Speech	Disgust	Strong	Dogs	R2	A2	7	7	1	1
01-01-07-02-02-02-03.mp4	AV	Speech	Disgust	Strong	Dogs	R2	A3	7	7	1	1
01-01-07-02-02-02-04.mp4	AV	Speech	Disgust	Strong	Dogs	R2	A4	7	7	1	1
01-01-07-02-02-02-05.mp4	AV	Speech	Disgust	Strong	Dogs	R2	A5	7	7	1	1
01-01-07-02-02-02-06.mp4	AV	Speech	Disgust	Strong	Dogs	R2	A6	7	7	1	1
01-01-07-02-02-02-07.mp4	AV	Speech	Disgust	Strong	Dogs	R2	A7	7	7	1	1
01-01-07-02-02-02-08.mp4	AV	Speech	Disgust	Strong	Dogs	R2	A8	7	7	1	1
01-01-07-02-02-02-09.mp4	AV	Speech	Disgust	Strong	Dogs	R2	A9	7	4	1	0
01-01-07-02-02-02-10.mp4	AV	Speech	Disgust	Strong	Dogs	R2	A10	7	7	1	1
01-01-07-02-02-02-11.mp4	AV	Speech	Disgust	Strong	Dogs	R2	A11	7	7	1	1
01-01-07-02-02-02-12.mp4	AV	Speech	Disgust	Strong	Dogs	R2	A12	7	7	1	1
01-01-07-02-02-02-13.mp4	AV	Speech	Disgust	Strong	Dogs	R2	A13	7	7	1	1
01-01-07-02-02-02-14.mp4	AV	Speech	Disgust	Strong	Dogs	R2	A14	7	7	1	1
01-01-07-02-02-02-15.mp4	AV	Speech	Disgust	Strong	Dogs	R2	A15	7	7	1	1
01-01-07-02-02-02-16.mp4	AV	Speech	Disgust	Strong	Dogs	R2	A16	7	7	1	1
01-01-07-02-02-02-17.mp4	AV	Speech	Disgust	Strong	Dogs	R2	A17	7	7	1	1
01-01-07-02-02-02-18.mp4	AV	Speech	Disgust	Strong	Dogs	R2	A18	7	7	1	1
01-01-07-02-02-02-19.mp4	AV	Speech	Disgust	Strong	Dogs	R2	A19	7	7	1	1
01-01-07-02-02-02-20.mp4	AV	Speech	Disgust	Strong	Dogs	R2	A20	7	7	1	1
01-01-07-02-02-02-21.mp4	AV	Speech	Disgust	Strong	Dogs	R2	A21	7	7	1	1
01-01-07-02-02-02-22.mp4	AV	Speech	Disgust	Strong	Dogs	R2	A22	7	7	1	1
01-01-07-02-02-02-23.mp4	AV	Speech	Disgust	Strong	Dogs	R2	A23	7	7	1	1
01-01-07-02-02-02-24.mp4	AV	Speech	Disgust	Strong	Dogs	R2	A24	7	7	1	1
01-01-08-01-01-01-01.mp4	AV	Speech	Surprise	Normal	Kids	R1	A1	9	8	0	1
01-01-08-01-01-01-02.mp4	AV	Speech	Surprise	Normal	Kids	R1	A2	8	8	1	1
01-01-08-01-01-01-03.mp4	AV	Speech	Surprise	Normal	Kids	R1	A3	6	7	0	0
01-01-08-01-01-01-04.mp4	AV	Speech	Surprise	Normal	Kids	R1	A4	8	8	1	1
01-01-08-01-01-01-05.mp4	AV	Speech	Surprise	Normal	Kids	R1	A5	8	8	1	1
01-01-08-01-01-01-06.mp4	AV	Speech	Surprise	Normal	Kids	R1	A6	8	8	1	1
01-01-08-01-01-01-07.mp4	AV	Speech	Surprise	Normal	Kids	R1	A7	8	8	1	1
01-01-08-01-01-01-08.mp4	AV	Speech	Surprise	Normal	Kids	R1	A8	8	8	1	1
01-01-08-01-01-01-09.mp4	AV	Speech	Surprise	Normal	Kids	R1	A9	9	9	0	0
01-01-08-01-01-01-10.mp4	AV	Speech	Surprise	Normal	Kids	R1	A10	8	8	1	1
01-01-08-01-01-01-11.mp4	AV	Speech	Surprise	Normal	Kids	R1	A11	8	8	1	1
01-01-08-01-01-01-12.mp4	AV	Speech	Surprise	Normal	Kids	R1	A12	8	8	1	1
01-01-08-01-01-01-13.mp4	AV	Speech	Surprise	Normal	Kids	R1	A13	8	8	1	1
01-01-08-01-01-01-14.mp4	AV	Speech	Surprise	Normal	Kids	R1	A14	8	8	1	1
01-01-08-01-01-01-15.mp4	AV	Speech	Surprise	Normal	Kids	R1	A15	3	3	0	0
01-01-08-01-01-01-16.mp4	AV	Speech	Surprise	Normal	Kids	R1	A16	8	8	1	1
01-01-08-01-01-01-17.mp4	AV	Speech	Surprise	Normal	Kids	R1	A17	8	8	1	1
01-01-08-01-01-01-18.mp4	AV	Speech	Surprise	Normal	Kids	R1	A18	9	9	0	0
01-01-08-01-01-01-19.mp4	AV	Speech	Surprise	Normal	Kids	R1	A19	8	8	1	1
01-01-08-01-01-01-20.mp4	AV	Speech	Surprise	Normal	Kids	R1	A20	8	8	1	1
01-01-08-01-01-01-21.mp4	AV	Speech	Surprise	Normal	Kids	R1	A21	8	8	1	1
01-01-08-01-01-01-22.mp4	AV	Speech	Surprise	Normal	Kids	R1	A22	9	9	0	0
01-01-08-01-01-01-23.mp4	AV	Speech	Surprise	Normal	Kids	R1	A23	9	8	0	1
01-01-08-01-01-01-24.mp4	AV	Speech	Surprise	Normal	Kids	R1	A24	9	9	0	0
01-01-08-01-01-02-01.mp4	AV	Speech	Surprise	Normal	Kids	R2	A1	9	9	0	0
01-01-08-01-01-02-02.mp4	AV	Speech	Surprise	Normal	Kids	R2	A2	8	8	1	1
01-01-08-01-01-02-03.mp4	AV	Speech	Surprise	Normal	Kids	R2	A3	8	8	1	1
01-01-08-01-01-02-04.mp4	AV	Speech	Surprise	Normal	Kids	R2	A4	8	8	1	1
01-01-08-01-01-02-05.mp4	AV	Speech	Surprise	Normal	Kids	R2	A5	8	8	1	1
01-01-08-01-01-02-06.mp4	AV	Speech	Surprise	Normal	Kids	R2	A6	8	8	1	1
01-01-08-01-01-02-07.mp4	AV	Speech	Surprise	Normal	Kids	R2	A7	8	8	1	1
01-01-08-01-01-02-08.mp4	AV	Speech	Surprise	Normal	Kids	R2	A8	8	8	1	1
01-01-08-01-01-02-09.mp4	AV	Speech	Surprise	Normal	Kids	R2	A9	8	8	1	1
01-01-08-01-01-02-10.mp4	AV	Speech	Surprise	Normal	Kids	R2	A10	8	8	1	1
01-01-08-01-01-02-11.mp4	AV	Speech	Surprise	Normal	Kids	R2	A11	3	3	0	0
01-01-08-01-01-02-12.mp4	AV	Speech	Surprise	Normal	Kids	R2	A12	8	8	1	1
01-01-08-01-01-02-13.mp4	AV	Speech	Surprise	Normal	Kids	R2	A13	8	8	1	1
01-01-08-01-01-02-14.mp4	AV	Speech	Surprise	Normal	Kids	R2	A14	8	8	1	1
01-01-08-01-01-02-15.mp4	AV	Speech	Surprise	Normal	Kids	R2	A15	8	7	1	0
01-01-08-01-01-02-16.mp4	AV	Speech	Surprise	Normal	Kids	R2	A16	8	8	1	1
01-01-08-01-01-02-17.mp4	AV	Speech	Surprise	Normal	Kids	R2	A17	9	9	0	0
01-01-08-01-01-02-18.mp4	AV	Speech	Surprise	Normal	Kids	R2	A18	7	3	0	0
01-01-08-01-01-02-19.mp4	AV	Speech	Surprise	Normal	Kids	R2	A19	8	8	1	1
01-01-08-01-01-02-20.mp4	AV	Speech	Surprise	Normal	Kids	R2	A20	7	7	0	0
01-01-08-01-01-02-21.mp4	AV	Speech	Surprise	Normal	Kids	R2	A21	8	8	1	1
01-01-08-01-01-02-22.mp4	AV	Speech	Surprise	Normal	Kids	R2	A22	9	8	0	1
01-01-08-01-01-02-23.mp4	AV	Speech	Surprise	Normal	Kids	R2	A23	1	1	0	0
01-01-08-01-01-02-24.mp4	AV	Speech	Surprise	Normal	Kids	R2	A24	8	8	1	1
01-01-08-01-02-01-01.mp4	AV	Speech	Surprise	Normal	Dogs	R1	A1	8	8	1	1
01-01-08-01-02-01-02.mp4	AV	Speech	Surprise	Normal	Dogs	R1	A2	8	8	1	1
01-01-08-01-02-01-03.mp4	AV	Speech	Surprise	Normal	Dogs	R1	A3	7	8	0	1
01-01-08-01-02-01-04.mp4	AV	Speech	Surprise	Normal	Dogs	R1	A4	8	8	1	1
01-01-08-01-02-01-05.mp4	AV	Speech	Surprise	Normal	Dogs	R1	A5	1	9	0	0
01-01-08-01-02-01-06.mp4	AV	Speech	Surprise	Normal	Dogs	R1	A6	8	8	1	1
01-01-08-01-02-01-07.mp4	AV	Speech	Surprise	Normal	Dogs	R1	A7	8	8	1	1
01-01-08-01-02-01-08.mp4	AV	Speech	Surprise	Normal	Dogs	R1	A8	8	8	1	1
01-01-08-01-02-01-09.mp4	AV	Speech	Surprise	Normal	Dogs	R1	A9	7	8	0	1
01-01-08-01-02-01-10.mp4	AV	Speech	Surprise	Normal	Dogs	R1	A10	8	8	1	1
01-01-08-01-02-01-11.mp4	AV	Speech	Surprise	Normal	Dogs	R1	A11	8	8	1	1
01-01-08-01-02-01-12.mp4	AV	Speech	Surprise	Normal	Dogs	R1	A12	8	8	1	1
01-01-08-01-02-01-13.mp4	AV	Speech	Surprise	Normal	Dogs	R1	A13	8	8	1	1
01-01-08-01-02-01-14.mp4	AV	Speech	Surprise	Normal	Dogs	R1	A14	8	8	1	1
01-01-08-01-02-01-15.mp4	AV	Speech	Surprise	Normal	Dogs	R1	A15	2	8	0	1
01-01-08-01-02-01-16.mp4	AV	Speech	Surprise	Normal	Dogs	R1	A16	8	8	1	1
01-01-08-01-02-01-17.mp4	AV	Speech	Surprise	Normal	Dogs	R1	A17	8	8	1	1
01-01-08-01-02-01-18.mp4	AV	Speech	Surprise	Normal	Dogs	R1	A18	7	8	0	1
01-01-08-01-02-01-19.mp4	AV	Speech	Surprise	Normal	Dogs	R1	A19	8	8	1	1
01-01-08-01-02-01-20.mp4	AV	Speech	Surprise	Normal	Dogs	R1	A20	8	8	1	1
01-01-08-01-02-01-21.mp4	AV	Speech	Surprise	Normal	Dogs	R1	A21	8	8	1	1
01-01-08-01-02-01-22.mp4	AV	Speech	Surprise	Normal	Dogs	R1	A22	8	8	1	1
01-01-08-01-02-01-23.mp4	AV	Speech	Surprise	Normal	Dogs	R1	A23	8	8	1	1
01-01-08-01-02-01-24.mp4	AV	Speech	Surprise	Normal	Dogs	R1	A24	8	8	1	1
01-01-08-01-02-02-01.mp4	AV	Speech	Surprise	Normal	Dogs	R2	A1	8	8	1	1
01-01-08-01-02-02-02.mp4	AV	Speech	Surprise	Normal	Dogs	R2	A2	8	8	1	1
01-01-08-01-02-02-03.mp4	AV	Speech	Surprise	Normal	Dogs	R2	A3	8	8	1	1
01-01-08-01-02-02-04.mp4	AV	Speech	Surprise	Normal	Dogs	R2	A4	8	8	1	1
01-01-08-01-02-02-05.mp4	AV	Speech	Surprise	Normal	Dogs	R2	A5	8	8	1	1
01-01-08-01-02-02-06.mp4	AV	Speech	Surprise	Normal	Dogs	R2	A6	8	8	1	1
01-01-08-01-02-02-07.mp4	AV	Speech	Surprise	Normal	Dogs	R2	A7	8	8	1	1
01-01-08-01-02-02-08.mp4	AV	Speech	Surprise	Normal	Dogs	R2	A8	8	8	1	1
01-01-08-01-02-02-09.mp4	AV	Speech	Surprise	Normal	Dogs	R2	A9	9	9	0	0
01-01-08-01-02-02-10.mp4	AV	Speech	Surprise	Normal	Dogs	R2	A10	8	8	1	1
01-01-08-01-02-02-11.mp4	AV	Speech	Surprise	Normal	Dogs	R2	A11	8	8	1	1
01-01-08-01-02-02-12.mp4	AV	Speech	Surprise	Normal	Dogs	R2	A12	1	5	0	0
01-01-08-01-02-02-13.mp4	AV	Speech	Surprise	Normal	Dogs	R2	A13	8	8	1	1
01-01-08-01-02-02-14.mp4	AV	Speech	Surprise	Normal	Dogs	R2	A14	8	8	1	1
01-01-08-01-02-02-15.mp4	AV	Speech	Surprise	Normal	Dogs	R2	A15	1	9	0	0
01-01-08-01-02-02-16.mp4	AV	Speech	Surprise	Normal	Dogs	R2	A16	8	8	1	1
01-01-08-01-02-02-17.mp4	AV	Speech	Surprise	Normal	Dogs	R2	A17	8	8	1	1
01-01-08-01-02-02-18.mp4	AV	Speech	Surprise	Normal	Dogs	R2	A18	9	9	0	0
01-01-08-01-02-02-19.mp4	AV	Speech	Surprise	Normal	Dogs	R2	A19	8	9	1	0
01-01-08-01-02-02-20.mp4	AV	Speech	Surprise	Normal	Dogs	R2	A20	9	8	0	1
01-01-08-01-02-02-21.mp4	AV	Speech	Surprise	Normal	Dogs	R2	A21	9	8	0	1
01-01-08-01-02-02-22.mp4	AV	Speech	Surprise	Normal	Dogs	R2	A22	3	8	0	1
01-01-08-01-02-02-23.mp4	AV	Speech	Surprise	Normal	Dogs	R2	A23	5	8	0	1
01-01-08-01-02-02-24.mp4	AV	Speech	Surprise	Normal	Dogs	R2	A24	2	2	0	0
01-01-08-02-01-01-01.mp4	AV	Speech	Surprise	Strong	Kids	R1	A1	8	8	1	1
01-01-08-02-01-01-02.mp4	AV	Speech	Surprise	Strong	Kids	R1	A2	8	8	1	1
01-01-08-02-01-01-03.mp4	AV	Speech	Surprise	Strong	Kids	R1	A3	8	8	1	1
01-01-08-02-01-01-04.mp4	AV	Speech	Surprise	Strong	Kids	R1	A4	8	8	1	1
01-01-08-02-01-01-05.mp4	AV	Speech	Surprise	Strong	Kids	R1	A5	8	8	1	1
01-01-08-02-01-01-06.mp4	AV	Speech	Surprise	Strong	Kids	R1	A6	8	8	1	1
01-01-08-02-01-01-07.mp4	AV	Speech	Surprise	Strong	Kids	R1	A7	8	8	1	1
01-01-08-02-01-01-08.mp4	AV	Speech	Surprise	Strong	Kids	R1	A8	8	8	1	1
01-01-08-02-01-01-09.mp4	AV	Speech	Surprise	Strong	Kids	R1	A9	8	8	1	1
01-01-08-02-01-01-10.mp4	AV	Speech	Surprise	Strong	Kids	R1	A10	8	8	1	1
01-01-08-02-01-01-11.mp4	AV	Speech	Surprise	Strong	Kids	R1	A11	8	8	1	1
01-01-08-02-01-01-12.mp4	AV	Speech	Surprise	Strong	Kids	R1	A12	8	8	1	1
01-01-08-02-01-01-13.mp4	AV	Speech	Surprise	Strong	Kids	R1	A13	8	8	1	1
01-01-08-02-01-01-14.mp4	AV	Speech	Surprise	Strong	Kids	R1	A14	8	8	1	1
01-01-08-02-01-01-15.mp4	AV	Speech	Surprise	Strong	Kids	R1	A15	3	3	0	0
01-01-08-02-01-01-16.mp4	AV	Speech	Surprise	Strong	Kids	R1	A16	8	8	1	1
01-01-08-02-01-01-17.mp4	AV	Speech	Surprise	Strong	Kids	R1	A17	8	8	1	1
01-01-08-02-01-01-18.mp4	AV	Speech	Surprise	Strong	Kids	R1	A18	8	8	1	1
01-01-08-02-01-01-19.mp4	AV	Speech	Surprise	Strong	Kids	R1	A19	8	8	1	1
01-01-08-02-01-01-20.mp4	AV	Speech	Surprise	Strong	Kids	R1	A20	8	8	1	1
01-01-08-02-01-01-21.mp4	AV	Speech	Surprise	Strong	Kids	R1	A21	8	8	1	1
01-01-08-02-01-01-22.mp4	AV	Speech	Surprise	Strong	Kids	R1	A22	8	8	1	1
01-01-08-02-01-01-23.mp4	AV	Speech	Surprise	Strong	Kids	R1	A23	8	8	1	1
01-01-08-02-01-01-24.mp4	AV	Speech	Surprise	Strong	Kids	R1	A24	8	8	1	1
01-01-08-02-01-02-01.mp4	AV	Speech	Surprise	Strong	Kids	R2	A1	7	7	0	0
01-01-08-02-01-02-02.mp4	AV	Speech	Surprise	Strong	Kids	R2	A2	8	8	1	1
01-01-08-02-01-02-03.mp4	AV	Speech	Surprise	Strong	Kids	R2	A3	9	8	0	1
01-01-08-02-01-02-04.mp4	AV	Speech	Surprise	Strong	Kids	R2	A4	8	8	1	1
01-01-08-02-01-02-05.mp4	AV	Speech	Surprise	Strong	Kids	R2	A5	8	8	1	1
01-01-08-02-01-02-06.mp4	AV	Speech	Surprise	Strong	Kids	R2	A6	8	8	1	1
01-01-08-02-01-02-07.mp4	AV	Speech	Surprise	Strong	Kids	R2	A7	8	8	1	1
01-01-08-02-01-02-08.mp4	AV	Speech	Surprise	Strong	Kids	R2	A8	8	8	1	1
01-01-08-02-01-02-09.mp4	AV	Speech	Surprise	Strong	Kids	R2	A9	7	8	0	1
01-01-08-02-01-02-10.mp4	AV	Speech	Surprise	Strong	Kids	R2	A10	8	8	1	1
01-01-08-02-01-02-11.mp4	AV	Speech	Surprise	Strong	Kids	R2	A11	8	8	1	1
01-01-08-02-01-02-12.mp4	AV	Speech	Surprise	Strong	Kids	R2	A12	8	8	1	1
01-01-08-02-01-02-13.mp4	AV	Speech	Surprise	Strong	Kids	R2	A13	8	8	1	1
01-01-08-02-01-02-14.mp4	AV	Speech	Surprise	Strong	Kids	R2	A14	8	8	1	1
01-01-08-02-01-02-15.mp4	AV	Speech	Surprise	Strong	Kids	R2	A15	3	3	0	0
01-01-08-02-01-02-16.mp4	AV	Speech	Surprise	Strong	Kids	R2	A16	8	8	1	1
01-01-08-02-01-02-17.mp4	AV	Speech	Surprise	Strong	Kids	R2	A17	8	8	1	1
01-01-08-02-01-02-18.mp4	AV	Speech	Surprise	Strong	Kids	R2	A18	8	8	1	1
01-01-08-02-01-02-19.mp4	AV	Speech	Surprise	Strong	Kids	R2	A19	8	8	1	1
01-01-08-02-01-02-20.mp4	AV	Speech	Surprise	Strong	Kids	R2	A20	8	8	1	1
01-01-08-02-01-02-21.mp4	AV	Speech	Surprise	Strong	Kids	R2	A21	8	8	1	1
01-01-08-02-01-02-22.mp4	AV	Speech	Surprise	Strong	Kids	R2	A22	8	8	1	1
01-01-08-02-01-02-23.mp4	AV	Speech	Surprise	Strong	Kids	R2	A23	5	5	0	0
01-01-08-02-01-02-24.mp4	AV	Speech	Surprise	Strong	Kids	R2	A24	8	8	1	1
01-01-08-02-02-01-01.mp4	AV	Speech	Surprise	Strong	Dogs	R1	A1	8	8	1	1
01-01-08-02-02-01-02.mp4	AV	Speech	Surprise	Strong	Dogs	R1	A2	8	8	1	1
01-01-08-02-02-01-03.mp4	AV	Speech	Surprise	Strong	Dogs	R1	A3	8	8	1	1
01-01-08-02-02-01-04.mp4	AV	Speech	Surprise	Strong	Dogs	R1	A4	8	8	1	1
01-01-08-02-02-01-05.mp4	AV	Speech	Surprise	Strong	Dogs	R1	A5	3	8	0	1
01-01-08-02-02-01-06.mp4	AV	Speech	Surprise	Strong	Dogs	R1	A6	8	8	1	1
01-01-08-02-02-01-07.mp4	AV	Speech	Surprise	Strong	Dogs	R1	A7	8	8	1	1
01-01-08-02-02-01-08.mp4	AV	Speech	Surprise	Strong	Dogs	R1	A8	8	8	1	1
01-01-08-02-02-01-09.mp4	AV	Speech	Surprise	Strong	Dogs	R1	A9	8	8	1	1
01-01-08-02-02-01-10.mp4	AV	Speech	Surprise	Strong	Dogs	R1	A10	8	8	1	1
01-01-08-02-02-01-11.mp4	AV	Speech	Surprise	Strong	Dogs	R1	A11	8	8	1	1
01-01-08-02-02-01-12.mp4	AV	Speech	Surprise	Strong	Dogs	R1	A12	8	8	1	1
01-01-08-02-02-01-13.mp4	AV	Speech	Surprise	Strong	Dogs	R1	A13	8	8	1	1
01-01-08-02-02-01-14.mp4	AV	Speech	Surprise	Strong	Dogs	R1	A14	8	8	1	1
01-01-08-02-02-01-15.mp4	AV	Speech	Surprise	Strong	Dogs	R1	A15	3	3	0	0
01-01-08-02-02-01-16.mp4	AV	Speech	Surprise	Strong	Dogs	R1	A16	8	8	1	1
01-01-08-02-02-01-17.mp4	AV	Speech	Surprise	Strong	Dogs	R1	A17	8	8	1	1
01-01-08-02-02-01-18.mp4	AV	Speech	Surprise	Strong	Dogs	R1	A18	7	8	0	1
01-01-08-02-02-01-19.mp4	AV	Speech	Surprise	Strong	Dogs	R1	A19	8	8	1	1
01-01-08-02-02-01-20.mp4	AV	Speech	Surprise	Strong	Dogs	R1	A20	8	5	1	0
01-01-08-02-02-01-21.mp4	AV	Speech	Surprise	Strong	Dogs	R1	A21	8	8	1	1
01-01-08-02-02-01-22.mp4	AV	Speech	Surprise	Strong	Dogs	R1	A22	8	8	1	1
01-01-08-02-02-01-23.mp4	AV	Speech	Surprise	Strong	Dogs	R1	A23	8	8	1	1
01-01-08-02-02-01-24.mp4	AV	Speech	Surprise	Strong	Dogs	R1	A24	8	8	1	1
01-01-08-02-02-02-01.mp4	AV	Speech	Surprise	Strong	Dogs	R2	A1	8	8	1	1
01-01-08-02-02-02-02.mp4	AV	Speech	Surprise	Strong	Dogs	R2	A2	8	8	1	1
01-01-08-02-02-02-03.mp4	AV	Speech	Surprise	Strong	Dogs	R2	A3	8	8	1	1
01-01-08-02-02-02-04.mp4	AV	Speech	Surprise	Strong	Dogs	R2	A4	8	8	1	1
01-01-08-02-02-02-05.mp4	AV	Speech	Surprise	Strong	Dogs	R2	A5	2	8	0	1
01-01-08-02-02-02-06.mp4	AV	Speech	Surprise	Strong	Dogs	R2	A6	8	8	1	1
01-01-08-02-02-02-07.mp4	AV	Speech	Surprise	Strong	Dogs	R2	A7	8	8	1	1
01-01-08-02-02-02-08.mp4	AV	Speech	Surprise	Strong	Dogs	R2	A8	2	8	0	1
01-01-08-02-02-02-09.mp4	AV	Speech	Surprise	Strong	Dogs	R2	A9	8	8	1	1
01-01-08-02-02-02-10.mp4	AV	Speech	Surprise	Strong	Dogs	R2	A10	8	8	1	1
01-01-08-02-02-02-11.mp4	AV	Speech	Surprise	Strong	Dogs	R2	A11	8	8	1	1
01-01-08-02-02-02-12.mp4	AV	Speech	Surprise	Strong	Dogs	R2	A12	8	8	1	1
01-01-08-02-02-02-13.mp4	AV	Speech	Surprise	Strong	Dogs	R2	A13	8	8	1	1
01-01-08-02-02-02-14.mp4	AV	Speech	Surprise	Strong	Dogs	R2	A14	5	8	0	1
01-01-08-02-02-02-15.mp4	AV	Speech	Surprise	Strong	Dogs	R2	A15	8	8	1	1
01-01-08-02-02-02-16.mp4	AV	Speech	Surprise	Strong	Dogs	R2	A16	8	8	1	1
01-01-08-02-02-02-17.mp4	AV	Speech	Surprise	Strong	Dogs	R2	A17	8	8	1	1
01-01-08-02-02-02-18.mp4	AV	Speech	Surprise	Strong	Dogs	R2	A18	6	6	0	0
01-01-08-02-02-02-19.mp4	AV	Speech	Surprise	Strong	Dogs	R2	A19	8	8	1	1
01-01-08-02-02-02-20.mp4	AV	Speech	Surprise	Strong	Dogs	R2	A20	8	8	1	1
01-01-08-02-02-02-21.mp4	AV	Speech	Surprise	Strong	Dogs	R2	A21	8	8	1	1
01-01-08-02-02-02-22.mp4	AV	Speech	Surprise	Strong	Dogs	R2	A22	8	8	1	1
01-01-08-02-02-02-23.mp4	AV	Speech	Surprise	Strong	Dogs	R2	A23	8	8	1	1
01-01-08-02-02-02-24.mp4	AV	Speech	Surprise	Strong	Dogs	R2	A24	3	3	0	0
02-01-01-01-01-01-01.mp4	VO	Speech	Neutral	Normal	Kids	R1	A1	2	2	1	1
02-01-01-01-01-01-02.mp4	VO	Speech	Neutral	Normal	Kids	R1	A2	5	1	0	1
02-01-01-01-01-01-03.mp4	VO	Speech	Neutral	Normal	Kids	R1	A3	4	4	0	0
02-01-01-01-01-01-04.mp4	VO	Speech	Neutral	Normal	Kids	R1	A4	5	2	0	1
02-01-01-01-01-01-05.mp4	VO	Speech	Neutral	Normal	Kids	R1	A5	1	1	1	1
02-01-01-01-01-01-06.mp4	VO	Speech	Neutral	Normal	Kids	R1	A6	1	1	1	1
02-01-01-01-01-01-07.mp4	VO	Speech	Neutral	Normal	Kids	R1	A7	2	2	1	1
02-01-01-01-01-01-08.mp4	VO	Speech	Neutral	Normal	Kids	R1	A8	1	2	1	1
02-01-01-01-01-01-09.mp4	VO	Speech	Neutral	Normal	Kids	R1	A9	4	1	0	1
02-01-01-01-01-01-10.mp4	VO	Speech	Neutral	Normal	Kids	R1	A10	9	5	0	0
02-01-01-01-01-01-11.mp4	VO	Speech	Neutral	Normal	Kids	R1	A11	1	1	1	1
02-01-01-01-01-01-12.mp4	VO	Speech	Neutral	Normal	Kids	R1	A12	1	1	1	1
02-01-01-01-01-01-13.mp4	VO	Speech	Neutral	Normal	Kids	R1	A13	4	4	0	0
02-01-01-01-01-01-14.mp4	VO	Speech	Neutral	Normal	Kids	R1	A14	9	1	0	1
02-01-01-01-01-01-15.mp4	VO	Speech	Neutral	Normal	Kids	R1	A15	1	1	1	1
02-01-01-01-01-01-16.mp4	VO	Speech	Neutral	Normal	Kids	R1	A16	5	5	0	0
02-01-01-01-01-01-17.mp4	VO	Speech	Neutral	Normal	Kids	R1	A17	5	5	0	0
02-01-01-01-01-01-18.mp4	VO	Speech	Neutral	Normal	Kids	R1	A18	1	1	1	1
02-01-01-01-01-01-19.mp4	VO	Speech	Neutral	Normal	Kids	R1	A19	1	1	1	1
02-01-01-01-01-01-20.mp4	VO	Speech	Neutral	Normal	Kids	R1	A20	1	1	1	1
02-01-01-01-01-01-21.mp4	VO	Speech	Neutral	Normal	Kids	R1	A21	7	1	0	1
02-01-01-01-01-01-22.mp4	VO	Speech	Neutral	Normal	Kids	R1	A22	4	2	0	1
02-01-01-01-01-01-23.mp4	VO	Speech	Neutral	Normal	Kids	R1	A23	9	1	0	1
02-01-01-01-01-01-24.mp4	VO	Speech	Neutral	Normal	Kids	R1	A24	1	1	1	1
02-01-01-01-01-02-01.mp4	VO	Speech	Neutral	Normal	Kids	R2	A1	2	2	1	1
02-01-01-01-01-02-02.mp4	VO	Speech	Neutral	Normal	Kids	R2	A2	1	1	1	1
02-01-01-01-01-02-03.mp4	VO	Speech	Neutral	Normal	Kids	R2	A3	4	9	0	0
02-01-01-01-01-02-04.mp4	VO	Speech	Neutral	Normal	Kids	R2	A4	1	1	1	1
02-01-01-01-01-02-05.mp4	VO	Speech	Neutral	Normal	Kids	R2	A5	1	2	1	1
02-01-01-01-01-02-06.mp4	VO	Speech	Neutral	Normal	Kids	R2	A6	1	1	1	1
02-01-01-01-01-02-07.mp4	VO	Speech	Neutral	Normal	Kids	R2	A7	2	1	1	1
02-01-01-01-01-02-08.mp4	VO	Speech	Neutral	Normal	Kids	R2	A8	2	1	1	1
02-01-01-01-01-02-09.mp4	VO	Speech	Neutral	Normal	Kids	R2	A9	1	2	1	1
02-01-01-01-01-02-10.mp4	VO	Speech	Neutral	Normal	Kids	R2	A10	4	4	0	0
02-01-01-01-01-02-11.mp4	VO	Speech	Neutral	Normal	Kids	R2	A11	2	2	1	1
02-01-01-01-01-02-12.mp4	VO	Speech	Neutral	Normal	Kids	R2	A12	1	1	1	1
02-01-01-01-01-02-13.mp4	VO	Speech	Neutral	Normal	Kids	R2	A13	1	1	1	1
02-01-01-01-01-02-14.mp4	VO	Speech	Neutral	Normal	Kids	R2	A14	1	1	1	1
02-01-01-01-01-02-15.mp4	VO	Speech	Neutral	Normal	Kids	R2	A15	1	1	1	1
02-01-01-01-01-02-16.mp4	VO	Speech	Neutral	Normal	Kids	R2	A16	2	9	1	0
02-01-01-01-01-02-17.mp4	VO	Speech	Neutral	Normal	Kids	R2	A17	1	1	1	1
02-01-01-01-01-02-18.mp4	VO	Speech	Neutral	Normal	Kids	R2	A18	1	1	1	1
02-01-01-01-01-02-19.mp4	VO	Speech	Neutral	Normal	Kids	R2	A19	1	1	1	1
02-01-01-01-01-02-20.mp4	VO	Speech	Neutral	Normal	Kids	R2	A20	1	1	1	1
02-01-01-01-01-02-21.mp4	VO	Speech	Neutral	Normal	Kids	R2	A21	1	1	1	1
02-01-01-01-01-02-22.mp4	VO	Speech	Neutral	Normal	Kids	R2	A22	7	1	0	1
02-01-01-01-01-02-23.mp4	VO	Speech	Neutral	Normal	Kids	R2	A23	1	1	1	1
02-01-01-01-01-02-24.mp4	VO	Speech	Neutral	Normal	Kids	R2	A24	5	1	0	1
02-01-01-01-02-01-01.mp4	VO	Speech	Neutral	Normal	Dogs	R1	A1	1	1	1	1
02-01-01-01-02-01-02.mp4	VO	Speech	Neutral	Normal	Dogs	R1	A2	2	1	1	1
02-01-01-01-02-01-03.mp4	VO	Speech	Neutral	Normal	Dogs	R1	A3	4	4	0	0
02-01-01-01-02-01-04.mp4	VO	Speech	Neutral	Normal	Dogs	R1	A4	1	1	1	1
02-01-01-01-02-01-05.mp4	VO	Speech	Neutral	Normal	Dogs	R1	A5	1	1	1	1
02-01-01-01-02-01-06.mp4	VO	Speech	Neutral	Normal	Dogs	R1	A6	1	1	1	1
02-01-01-01-02-01-07.mp4	VO	Speech	Neutral	Normal	Dogs	R1	A7	1	1	1	1
02-01-01-01-02-01-08.mp4	VO	Speech	Neutral	Normal	Dogs	R1	A8	1	1	1	1
02-01-01-01-02-01-09.mp4	VO	Speech	Neutral	Normal	Dogs	R1	A9	4	4	0	0
02-01-01-01-02-01-10.mp4	VO	Speech	Neutral	Normal	Dogs	R1	A10	1	1	1	1
02-01-01-01-02-01-11.mp4	VO	Speech	Neutral	Normal	Dogs	R1	A11	1	1	1	1
02-01-01-01-02-01-12.mp4	VO	Speech	Neutral	Normal	Dogs	R1	A12	1	1	1	1
02-01-01-01-02-01-13.mp4	VO	Speech	Neutral	Normal	Dogs	R1	A13	4	5	0	0
02-01-01-01-02-01-14.mp4	VO	Speech	Neutral	Normal	Dogs	R1	A14	4	1	0	1
02-01-01-01-02-01-15.mp4	VO	Speech	Neutral	Normal	Dogs	R1	A15	2	1	1	1
02-01-01-01-02-01-16.mp4	VO	Speech	Neutral	Normal	Dogs	R1	A16	1	1	1	1
02-01-01-01-02-01-17.mp4	VO	Speech	Neutral	Normal	Dogs	R1	A17	1	1	1	1
02-01-01-01-02-01-18.mp4	VO	Speech	Neutral	Normal	Dogs	R1	A18	1	1	1	1
02-01-01-01-02-01-19.mp4	VO	Speech	Neutral	Normal	Dogs	R1	A19	1	1	1	1
02-01-01-01-02-01-20.mp4	VO	Speech	Neutral	Normal	Dogs	R1	A20	9	1	0	1
02-01-01-01-02-01-21.mp4	VO	Speech	Neutral	Normal	Dogs	R1	A21	1	1	1	1
02-01-01-01-02-01-22.mp4	VO	Speech	Neutral	Normal	Dogs	R1	A22	1	1	1	1
02-01-01-01-02-01-23.mp4	VO	Speech	Neutral	Normal	Dogs	R1	A23	2	2	1	1
02-01-01-01-02-01-24.mp4	VO	Speech	Neutral	Normal	Dogs	R1	A24	5	7	0	0
02-01-01-01-02-02-01.mp4	VO	Speech	Neutral	Normal	Dogs	R2	A1	2	2	1	1
02-01-01-01-02-02-02.mp4	VO	Speech	Neutral	Normal	Dogs	R2	A2	1	1	1	1
02-01-01-01-02-02-03.mp4	VO	Speech	Neutral	Normal	Dogs	R2	A3	1	1	1	1
02-01-01-01-02-02-04.mp4	VO	Speech	Neutral	Normal	Dogs	R2	A4	1	1	1	1
02-01-01-01-02-02-05.mp4	VO	Speech	Neutral	Normal	Dogs	R2	A5	4	1	0	1
02-01-01-01-02-02-06.mp4	VO	Speech	Neutral	Normal	Dogs	R2	A6	2	1	1	1
02-01-01-01-02-02-07.mp4	VO	Speech	Neutral	Normal	Dogs	R2	A7	1	1	1	1
02-01-01-01-02-02-08.mp4	VO	Speech	Neutral	Normal	Dogs	R2	A8	2	1	1	1
02-01-01-01-02-02-09.mp4	VO	Speech	Neutral	Normal	Dogs	R2	A9	4	4	0	0
02-01-01-01-02-02-10.mp4	VO	Speech	Neutral	Normal	Dogs	R2	A10	9	2	0	1
02-01-01-01-02-02-11.mp4	VO	Speech	Neutral	Normal	Dogs	R2	A11	2	1	1	1
02-01-01-01-02-02-12.mp4	VO	Speech	Neutral	Normal	Dogs	R2	A12	1	1	1	1
02-01-01-01-02-02-13.mp4	VO	Speech	Neutral	Normal	Dogs	R2	A13	2	2	1	1
02-01-01-01-02-02-14.mp4	VO	Speech	Neutral	Normal	Dogs	R2	A14	1	1	1	1
02-01-01-01-02-02-15.mp4	VO	Speech	Neutral	Normal	Dogs	R2	A15	1	1	1	1
02-01-01-01-02-02-16.mp4	VO	Speech	Neutral	Normal	Dogs	R2	A16	9	1	0	1
02-01-01-01-02-02-17.mp4	VO	Speech	Neutral	Normal	Dogs	R2	A17	2	1	1	1
02-01-01-01-02-02-18.mp4	VO	Speech	Neutral	Normal	Dogs	R2	A18	1	1	1	1
02-01-01-01-02-02-19.mp4	VO	Speech	Neutral	Normal	Dogs	R2	A19	1	1	1	1
02-01-01-01-02-02-20.mp4	VO	Speech	Neutral	Normal	Dogs	R2	A20	4	1	0	1
02-01-01-01-02-02-21.mp4	VO	Speech	Neutral	Normal	Dogs	R2	A21	1	1	1	1
02-01-01-01-02-02-22.mp4	VO	Speech	Neutral	Normal	Dogs	R2	A22	1	1	1	1
02-01-01-01-02-02-23.mp4	VO	Speech	Neutral	Normal	Dogs	R2	A23	2	1	1	1
02-01-01-01-02-02-24.mp4	VO	Speech	Neutral	Normal	Dogs	R2	A24	6	1	0	1
02-01-02-01-01-01-01.mp4	VO	Speech	Calm	Normal	Kids	R1	A1	1	1	1	1
02-01-02-01-01-01-02.mp4	VO	Speech	Calm	Normal	Kids	R1	A2	1	2	1	1
02-01-02-01-01-01-03.mp4	VO	Speech	Calm	Normal	Kids	R1	A3	4	4	0	0
02-01-02-01-01-01-04.mp4	VO	Speech	Calm	Normal	Kids	R1	A4	3	3	0	0
02-01-02-01-01-01-05.mp4	VO	Speech	Calm	Normal	Kids	R1	A5	3	3	0	0
02-01-02-01-01-01-06.mp4	VO	Speech	Calm	Normal	Kids	R1	A6	1	2	1	1
02-01-02-01-01-01-07.mp4	VO	Speech	Calm	Normal	Kids	R1	A7	2	3	1	0
02-01-02-01-01-01-08.mp4	VO	Speech	Calm	Normal	Kids	R1	A8	2	9	1	0
02-01-02-01-01-01-09.mp4	VO	Speech	Calm	Normal	Kids	R1	A9	2	3	1	0
02-01-02-01-01-01-10.mp4	VO	Speech	Calm	Normal	Kids	R1	A10	3	2	0	1
02-01-02-01-01-01-11.mp4	VO	Speech	Calm	Normal	Kids	R1	A11	2	3	1	0
02-01-02-01-01-01-12.mp4	VO	Speech	Calm	Normal	Kids	R1	A12	2	2	1	1
02-01-02-01-01-01-13.mp4	VO	Speech	Calm	Normal	Kids	R1	A13	1	1	1	1
02-01-02-01-01-01-14.mp4	VO	Speech	Calm	Normal	Kids	R1	A14	2	2	1	1
02-01-02-01-01-01-15.mp4	VO	Speech	Calm	Normal	Kids	R1	A15	2	2	1	1
02-01-02-01-01-01-16.mp4	VO	Speech	Calm	Normal	Kids	R1	A16	3	3	0	0
02-01-02-01-01-01-17.mp4	VO	Speech	Calm	Normal	Kids	R1	A17	1	1	1	1
02-01-02-01-01-01-18.mp4	VO	Speech	Calm	Normal	Kids	R1	A18	2	2	1	1
02-01-02-01-01-01-19.mp4	VO	Speech	Calm	Normal	Kids	R1	A19	2	2	1	1
02-01-02-01-01-01-20.mp4	VO	Speech	Calm	Normal	Kids	R1	A20	1	2	1	1
02-01-02-01-01-01-21.mp4	VO	Speech	Calm	Normal	Kids	R1	A21	3	3	0	0
02-01-02-01-01-01-22.mp4	VO	Speech	Calm	Normal	Kids	R1	A22	2	2	1	1
02-01-02-01-01-01-23.mp4	VO	Speech	Calm	Normal	Kids	R1	A23	2	1	1	1
02-01-02-01-01-01-24.mp4	VO	Speech	Calm	Normal	Kids	R1	A24	2	1	1	1
02-01-02-01-01-02-01.mp4	VO	Speech	Calm	Normal	Kids	R2	A1	2	2	1	1
02-01-02-01-01-02-02.mp4	VO	Speech	Calm	Normal	Kids	R2	A2	2	1	1	1
02-01-02-01-01-02-03.mp4	VO	Speech	Calm	Normal	Kids	R2	A3	4	4	0	0
02-01-02-01-01-02-04.mp4	VO	Speech	Calm	Normal	Kids	R2	A4	3	3	0	0
02-01-02-01-01-02-05.mp4	VO	Speech	Calm	Normal	Kids	R2	A5	2	2	1	1
02-01-02-01-01-02-06.mp4	VO	Speech	Calm	Normal	Kids	R2	A6	2	2	1	1
02-01-02-01-01-02-07.mp4	VO	Speech	Calm	Normal	Kids	R2	A7	9	9	0	0
02-01-02-01-01-02-08.mp4	VO	Speech	Calm	Normal	Kids	R2	A8	1	2	1	1
02-01-02-01-01-02-09.mp4	VO	Speech	Calm	Normal	Kids	R2	A9	2	2	1	1
02-01-02-01-01-02-10.mp4	VO	Speech	Calm	Normal	Kids	R2	A10	3	3	0	0
02-01-02-01-01-02-11.mp4	VO	Speech	Calm	Normal	Kids	R2	A11	3	9	0	0
02-01-02-01-01-02-12.mp4	VO	Speech	Calm	Normal	Kids	R2	A12	2	1	1	1
02-01-02-01-01-02-13.mp4	VO	Speech	Calm	Normal	Kids	R2	A13	1	1	1	1
02-01-02-01-01-02-14.mp4	VO	Speech	Calm	Normal	Kids	R2	A14	3	3	0	0
02-01-02-01-01-02-15.mp4	VO	Speech	Calm	Normal	Kids	R2	A15	2	2	1	1
02-01-02-01-01-02-16.mp4	VO	Speech	Calm	Normal	Kids	R2	A16	2	2	1	1
02-01-02-01-01-02-17.mp4	VO	Speech	Calm	Normal	Kids	R2	A17	2	2	1	1
02-01-02-01-01-02-18.mp4	VO	Speech	Calm	Normal	Kids	R2	A18	3	3	0	0
02-01-02-01-01-02-19.mp4	VO	Speech	Calm	Normal	Kids	R2	A19	2	2	1	1
02-01-02-01-01-02-20.mp4	VO	Speech	Calm	Normal	Kids	R2	A20	2	3	1	0
02-01-02-01-01-02-21.mp4	VO	Speech	Calm	Normal	Kids	R2	A21	1	1	1	1
02-01-02-01-01-02-22.mp4	VO	Speech	Calm	Normal	Kids	R2	A22	1	1	1	1
02-01-02-01-01-02-23.mp4	VO	Speech	Calm	Normal	Kids	R2	A23	1	2	1	1
02-01-02-01-01-02-24.mp4	VO	Speech	Calm	Normal	Kids	R2	A24	2	1	1	1
02-01-02-01-02-01-01.mp4	VO	Speech	Calm	Normal	Dogs	R1	A1	1	1	1	1
02-01-02-01-02-01-02.mp4	VO	Speech	Calm	Normal	Dogs	R1	A2	3	3	0	0
02-01-02-01-02-01-03.mp4	VO	Speech	Calm	Normal	Dogs	R1	A3	3	3	0	0
02-01-02-01-02-01-04.mp4	VO	Speech	Calm	Normal	Dogs	R1	A4	3	3	0	0
02-01-02-01-02-01-05.mp4	VO	Speech	Calm	Normal	Dogs	R1	A5	3	3	0	0
02-01-02-01-02-01-06.mp4	VO	Speech	Calm	Normal	Dogs	R1	A6	2	2	1	1
02-01-02-01-02-01-07.mp4	VO	Speech	Calm	Normal	Dogs	R1	A7	1	2	1	1
02-01-02-01-02-01-08.mp4	VO	Speech	Calm	Normal	Dogs	R1	A8	3	2	0	1
02-01-02-01-02-01-09.mp4	VO	Speech	Calm	Normal	Dogs	R1	A9	1	2	1	1
02-01-02-01-02-01-10.mp4	VO	Speech	Calm	Normal	Dogs	R1	A10	2	2	1	1
02-01-02-01-02-01-11.mp4	VO	Speech	Calm	Normal	Dogs	R1	A11	1	2	1	1
02-01-02-01-02-01-12.mp4	VO	Speech	Calm	Normal	Dogs	R1	A12	2	3	1	0
02-01-02-01-02-01-13.mp4	VO	Speech	Calm	Normal	Dogs	R1	A13	5	5	0	0
02-01-02-01-02-01-14.mp4	VO	Speech	Calm	Normal	Dogs	R1	A14	9	2	0	1
02-01-02-01-02-01-15.mp4	VO	Speech	Calm	Normal	Dogs	R1	A15	2	1	1	1
02-01-02-01-02-01-16.mp4	VO	Speech	Calm	Normal	Dogs	R1	A16	3	2	0	1
02-01-02-01-02-01-17.mp4	VO	Speech	Calm	Normal	Dogs	R1	A17	1	1	1	1
02-01-02-01-02-01-18.mp4	VO	Speech	Calm	Normal	Dogs	R1	A18	4	3	0	0
02-01-02-01-02-01-19.mp4	VO	Speech	Calm	Normal	Dogs	R1	A19	2	2	1	1
02-01-02-01-02-01-20.mp4	VO	Speech	Calm	Normal	Dogs	R1	A20	3	3	0	0
02-01-02-01-02-01-21.mp4	VO	Speech	Calm	Normal	Dogs	R1	A21	2	1	1	1
02-01-02-01-02-01-22.mp4	VO	Speech	Calm	Normal	Dogs	R1	A22	2	3	1	0
02-01-02-01-02-01-23.mp4	VO	Speech	Calm	Normal	Dogs	R1	A23	1	2	1	1
02-01-02-01-02-01-24.mp4	VO	Speech	Calm	Normal	Dogs	R1	A24	2	2	1	1
02-01-02-01-02-02-01.mp4	VO	Speech	Calm	Normal	Dogs	R2	A1	3	3	0	0
02-01-02-01-02-02-02.mp4	VO	Speech	Calm	Normal	Dogs	R2	A2	4	1	0	1
02-01-02-01-02-02-03.mp4	VO	Speech	Calm	Normal	Dogs	R2	A3	4	4	0	0
02-01-02-01-02-02-04.mp4	VO	Speech	Calm	Normal	Dogs	R2	A4	2	2	1	1
02-01-02-01-02-02-05.mp4	VO	Speech	Calm	Normal	Dogs	R2	A5	3	3	0	0
02-01-02-01-02-02-06.mp4	VO	Speech	Calm	Normal	Dogs	R2	A6	3	1	0	1
02-01-02-01-02-02-07.mp4	VO	Speech	Calm	Normal	Dogs	R2	A7	2	2	1	1
02-01-02-01-02-02-08.mp4	VO	Speech	Calm	Normal	Dogs	R2	A8	1	2	1	1
02-01-02-01-02-02-09.mp4	VO	Speech	Calm	Normal	Dogs	R2	A9	2	1	1	1
02-01-02-01-02-02-10.mp4	VO	Speech	Calm	Normal	Dogs	R2	A10	2	3	1	0
02-01-02-01-02-02-11.mp4	VO	Speech	Calm	Normal	Dogs	R2	A11	2	2	1	1
02-01-02-01-02-02-12.mp4	VO	Speech	Calm	Normal	Dogs	R2	A12	2	3	1	0
02-01-02-01-02-02-13.mp4	VO	Speech	Calm	Normal	Dogs	R2	A13	1	1	1	1
02-01-02-01-02-02-14.mp4	VO	Speech	Calm	Normal	Dogs	R2	A14	2	9	1	0
02-01-02-01-02-02-15.mp4	VO	Speech	Calm	Normal	Dogs	R2	A15	2	2	1	1
02-01-02-01-02-02-16.mp4	VO	Speech	Calm	Normal	Dogs	R2	A16	2	2	1	1
02-01-02-01-02-02-17.mp4	VO	Speech	Calm	Normal	Dogs	R2	A17	2	2	1	1
02-01-02-01-02-02-18.mp4	VO	Speech	Calm	Normal	Dogs	R2	A18	3	2	0	1
02-01-02-01-02-02-19.mp4	VO	Speech	Calm	Normal	Dogs	R2	A19	3	3	0	0
02-01-02-01-02-02-20.mp4	VO	Speech	Calm	Normal	Dogs	R2	A20	2	2	1	1
02-01-02-01-02-02-21.mp4	VO	Speech	Calm	Normal	Dogs	R2	A21	2	2	1	1
02-01-02-01-02-02-22.mp4	VO	Speech	Calm	Normal	Dogs	R2	A22	1	3	1	0
02-01-02-01-02-02-23.mp4	VO	Speech	Calm	Normal	Dogs	R2	A23	2	2	1	1
02-01-02-01-02-02-24.mp4	VO	Speech	Calm	Normal	Dogs	R2	A24	2	2	1	1
02-01-02-02-01-01-01.mp4	VO	Speech	Calm	Strong	Kids	R1	A1	2	3	1	0
02-01-02-02-01-01-02.mp4	VO	Speech	Calm	Strong	Kids	R1	A2	1	1	1	1
02-01-02-02-01-01-03.mp4	VO	Speech	Calm	Strong	Kids	R1	A3	4	4	0	0
02-01-02-02-01-01-04.mp4	VO	Speech	Calm	Strong	Kids	R1	A4	2	2	1	1
02-01-02-02-01-01-05.mp4	VO	Speech	Calm	Strong	Kids	R1	A5	3	2	0	1
02-01-02-02-01-01-06.mp4	VO	Speech	Calm	Strong	Kids	R1	A6	3	3	0	0
02-01-02-02-01-01-07.mp4	VO	Speech	Calm	Strong	Kids	R1	A7	2	2	1	1
02-01-02-02-01-01-08.mp4	VO	Speech	Calm	Strong	Kids	R1	A8	2	2	1	1
02-01-02-02-01-01-09.mp4	VO	Speech	Calm	Strong	Kids	R1	A9	2	2	1	1
02-01-02-02-01-01-10.mp4	VO	Speech	Calm	Strong	Kids	R1	A10	2	2	1	1
02-01-02-02-01-01-11.mp4	VO	Speech	Calm	Strong	Kids	R1	A11	2	2	1	1
02-01-02-02-01-01-12.mp4	VO	Speech	Calm	Strong	Kids	R1	A12	1	2	1	1
02-01-02-02-01-01-13.mp4	VO	Speech	Calm	Strong	Kids	R1	A13	1	3	1	0
02-01-02-02-01-01-14.mp4	VO	Speech	Calm	Strong	Kids	R1	A14	2	2	1	1
02-01-02-02-01-01-15.mp4	VO	Speech	Calm	Strong	Kids	R1	A15	2	9	1	0
02-01-02-02-01-01-16.mp4	VO	Speech	Calm	Strong	Kids	R1	A16	3	2	0	1
02-01-02-02-01-01-17.mp4	VO	Speech	Calm	Strong	Kids	R1	A17	2	2	1	1
02-01-02-02-01-01-18.mp4	VO	Speech	Calm	Strong	Kids	R1	A18	2	2	1	1
02-01-02-02-01-01-19.mp4	VO	Speech	Calm	Strong	Kids	R1	A19	3	2	0	1
02-01-02-02-01-01-20.mp4	VO	Speech	Calm	Strong	Kids	R1	A20	3	2	0	1
02-01-02-02-01-01-21.mp4	VO	Speech	Calm	Strong	Kids	R1	A21	3	3	0	0
02-01-02-02-01-01-22.mp4	VO	Speech	Calm	Strong	Kids	R1	A22	2	2	1	1
02-01-02-02-01-01-23.mp4	VO	Speech	Calm	Strong	Kids	R1	A23	2	2	1	1
02-01-02-02-01-01-24.mp4	VO	Speech	Calm	Strong	Kids	R1	A24	2	2	1	1
02-01-02-02-01-02-01.mp4	VO	Speech	Calm	Strong	Kids	R2	A1	2	2	1	1
02-01-02-02-01-02-02.mp4	VO	Speech	Calm	Strong	Kids	R2	A2	4	4	0	0
02-01-02-02-01-02-03.mp4	VO	Speech	Calm	Strong	Kids	R2	A3	6	6	0	0
02-01-02-02-01-02-04.mp4	VO	Speech	Calm	Strong	Kids	R2	A4	3	3	0	0
02-01-02-02-01-02-05.mp4	VO	Speech	Calm	Strong	Kids	R2	A5	2	4	1	0
02-01-02-02-01-02-06.mp4	VO	Speech	Calm	Strong	Kids	R2	A6	2	1	1	1
02-01-02-02-01-02-07.mp4	VO	Speech	Calm	Strong	Kids	R2	A7	3	2	0	1
02-01-02-02-01-02-08.mp4	VO	Speech	Calm	Strong	Kids	R2	A8	3	3	0	0
02-01-02-02-01-02-09.mp4	VO	Speech	Calm	Strong	Kids	R2	A9	3	3	0	0
02-01-02-02-01-02-10.mp4	VO	Speech	Calm	Strong	Kids	R2	A10	2	2	1	1
02-01-02-02-01-02-11.mp4	VO	Speech	Calm	Strong	Kids	R2	A11	2	2	1	1
02-01-02-02-01-02-12.mp4	VO	Speech	Calm	Strong	Kids	R2	A12	3	2	0	1
02-01-02-02-01-02-13.mp4	VO	Speech	Calm	Strong	Kids	R2	A13	1	2	1	1
02-01-02-02-01-02-14.mp4	VO	Speech	Calm	Strong	Kids	R2	A14	3	3	0	0
02-01-02-02-01-02-15.mp4	VO	Speech	Calm	Strong	Kids	R2	A15	1	2	1	1
02-01-02-02-01-02-16.mp4	VO	Speech	Calm	Strong	Kids	R2	A16	3	3	0	0
02-01-02-02-01-02-17.mp4	VO	Speech	Calm	Strong	Kids	R2	A17	1	1	1	1
02-01-02-02-01-02-18.mp4	VO	Speech	Calm	Strong	Kids	R2	A18	3	2	0	1
02-01-02-02-01-02-19.mp4	VO	Speech	Calm	Strong	Kids	R2	A19	3	3	0	0
02-01-02-02-01-02-20.mp4	VO	Speech	Calm	Strong	Kids	R2	A20	3	2	0	1
02-01-02-02-01-02-21.mp4	VO	Speech	Calm	Strong	Kids	R2	A21	1	9	1	0
02-01-02-02-01-02-22.mp4	VO	Speech	Calm	Strong	Kids	R2	A22	3	2	0	1
02-01-02-02-01-02-23.mp4	VO	Speech	Calm	Strong	Kids	R2	A23	2	2	1	1
02-01-02-02-01-02-24.mp4	VO	Speech	Calm	Strong	Kids	R2	A24	2	2	1	1
02-01-02-02-02-01-01.mp4	VO	Speech	Calm	Strong	Dogs	R1	A1	2	2	1	1
02-01-02-02-02-01-02.mp4	VO	Speech	Calm	Strong	Dogs	R1	A2	2	2	1	1
02-01-02-02-02-01-03.mp4	VO	Speech	Calm	Strong	Dogs	R1	A3	4	4	0	0
02-01-02-02-02-01-04.mp4	VO	Speech	Calm	Strong	Dogs	R1	A4	3	2	0	1
02-01-02-02-02-01-05.mp4	VO	Speech	Calm	Strong	Dogs	R1	A5	2	2	1	1
02-01-02-02-02-01-06.mp4	VO	Speech	Calm	Strong	Dogs	R1	A6	2	2	1	1
02-01-02-02-02-01-07.mp4	VO	Speech	Calm	Strong	Dogs	R1	A7	2	3	1	0
02-01-02-02-02-01-08.mp4	VO	Speech	Calm	Strong	Dogs	R1	A8	3	3	0	0
02-01-02-02-02-01-09.mp4	VO	Speech	Calm	Strong	Dogs	R1	A9	1	1	1	1
02-01-02-02-02-01-10.mp4	VO	Speech	Calm	Strong	Dogs	R1	A10	2	2	1	1
02-01-02-02-02-01-11.mp4	VO	Speech	Calm	Strong	Dogs	R1	A11	9	2	0	1
02-01-02-02-02-01-12.mp4	VO	Speech	Calm	Strong	Dogs	R1	A12	2	2	1	1
02-01-02-02-02-01-13.mp4	VO	Speech	Calm	Strong	Dogs	R1	A13	2	2	1	1
02-01-02-02-02-01-14.mp4	VO	Speech	Calm	Strong	Dogs	R1	A14	2	4	1	0
02-01-02-02-02-01-15.mp4	VO	Speech	Calm	Strong	Dogs	R1	A15	1	2	1	1
02-01-02-02-02-01-16.mp4	VO	Speech	Calm	Strong	Dogs	R1	A16	3	3	0	0
02-01-02-02-02-01-17.mp4	VO	Speech	Calm	Strong	Dogs	R1	A17	4	1	0	1
02-01-02-02-02-01-18.mp4	VO	Speech	Calm	Strong	Dogs	R1	A18	3	3	0	0
02-01-02-02-02-01-19.mp4	VO	Speech	Calm	Strong	Dogs	R1	A19	2	3	1	0
02-01-02-02-02-01-20.mp4	VO	Speech	Calm	Strong	Dogs	R1	A20	3	2	0	1
02-01-02-02-02-01-21.mp4	VO	Speech	Calm	Strong	Dogs	R1	A21	1	9	1	0
02-01-02-02-02-01-22.mp4	VO	Speech	Calm	Strong	Dogs	R1	A22	3	3	0	0
02-01-02-02-02-01-23.mp4	VO	Speech	Calm	Strong	Dogs	R1	A23	2	2	1	1
02-01-02-02-02-01-24.mp4	VO	Speech	Calm	Strong	Dogs	R1	A24	2	3	1	0
02-01-02-02-02-02-01.mp4	VO	Speech	Calm	Strong	Dogs	R2	A1	2	2	1	1
02-01-02-02-02-02-02.mp4	VO	Speech	Calm	Strong	Dogs	R2	A2	4	2	0	1
02-01-02-02-02-02-03.mp4	VO	Speech	Calm	Strong	Dogs	R2	A3	1	1	1	1
02-01-02-02-02-02-04.mp4	VO	Speech	Calm	Strong	Dogs	R2	A4	3	3	0	0
02-01-02-02-02-02-05.mp4	VO	Speech	Calm	Strong	Dogs	R2	A5	2	2	1	1
02-01-02-02-02-02-06.mp4	VO	Speech	Calm	Strong	Dogs	R2	A6	2	3	1	0
02-01-02-02-02-02-07.mp4	VO	Speech	Calm	Strong	Dogs	R2	A7	2	2	1	1
02-01-02-02-02-02-08.mp4	VO	Speech	Calm	Strong	Dogs	R2	A8	2	2	1	1
02-01-02-02-02-02-09.mp4	VO	Speech	Calm	Strong	Dogs	R2	A9	2	2	1	1
02-01-02-02-02-02-10.mp4	VO	Speech	Calm	Strong	Dogs	R2	A10	2	2	1	1
02-01-02-02-02-02-11.mp4	VO	Speech	Calm	Strong	Dogs	R2	A11	3	3	0	0
02-01-02-02-02-02-12.mp4	VO	Speech	Calm	Strong	Dogs	R2	A12	2	2	1	1
02-01-02-02-02-02-13.mp4	VO	Speech	Calm	Strong	Dogs	R2	A13	1	2	1	1
02-01-02-02-02-02-14.mp4	VO	Speech	Calm	Strong	Dogs	R2	A14	9	2	0	1
02-01-02-02-02-02-15.mp4	VO	Speech	Calm	Strong	Dogs	R2	A15	2	2	1	1
02-01-02-02-02-02-16.mp4	VO	Speech	Calm	Strong	Dogs	R2	A16	2	2	1	1
02-01-02-02-02-02-17.mp4	VO	Speech	Calm	Strong	Dogs	R2	A17	1	1	1	1
02-01-02-02-02-02-18.mp4	VO	Speech	Calm	Strong	Dogs	R2	A18	2	2	1	1
02-01-02-02-02-02-19.mp4	VO	Speech	Calm	Strong	Dogs	R2	A19	3	3	0	0
02-01-02-02-02-02-20.mp4	VO	Speech	Calm	Strong	Dogs	R2	A20	2	3	1	0
02-01-02-02-02-02-21.mp4	VO	Speech	Calm	Strong	Dogs	R2	A21	3	3	0	0
02-01-02-02-02-02-22.mp4	VO	Speech	Calm	Strong	Dogs	R2	A22	3	3	0	0
02-01-02-02-02-02-23.mp4	VO	Speech	Calm	Strong	Dogs	R2	A23	1	2	1	1
02-01-02-02-02-02-24.mp4	VO	Speech	Calm	Strong	Dogs	R2	A24	3	3	0	0
02-01-03-01-01-01-01.mp4	VO	Speech	Happy	Normal	Kids	R1	A1	3	8	1	0
02-01-03-01-01-01-02.mp4	VO	Speech	Happy	Normal	Kids	R1	A2	3	3	1	1
02-01-03-01-01-01-03.mp4	VO	Speech	Happy	Normal	Kids	R1	A3	6	4	0	0
02-01-03-01-01-01-04.mp4	VO	Speech	Happy	Normal	Kids	R1	A4	2	2	0	0
02-01-03-01-01-01-05.mp4	VO	Speech	Happy	Normal	Kids	R1	A5	3	3	1	1
02-01-03-01-01-01-06.mp4	VO	Speech	Happy	Normal	Kids	R1	A6	3	3	1	1
02-01-03-01-01-01-07.mp4	VO	Speech	Happy	Normal	Kids	R1	A7	3	3	1	1
02-01-03-01-01-01-08.mp4	VO	Speech	Happy	Normal	Kids	R1	A8	3	3	1	1
02-01-03-01-01-01-09.mp4	VO	Speech	Happy	Normal	Kids	R1	A9	3	3	1	1
02-01-03-01-01-01-10.mp4	VO	Speech	Happy	Normal	Kids	R1	A10	3	3	1	1
02-01-03-01-01-01-11.mp4	VO	Speech	Happy	Normal	Kids	R1	A11	1	1	0	0
02-01-03-01-01-01-12.mp4	VO	Speech	Happy	Normal	Kids	R1	A12	3	3	1	1
02-01-03-01-01-01-13.mp4	VO	Speech	Happy	Normal	Kids	R1	A13	3	3	1	1
02-01-03-01-01-01-14.mp4	VO	Speech	Happy	Normal	Kids	R1	A14	3	8	1	0
02-01-03-01-01-01-15.mp4	VO	Speech	Happy	Normal	Kids	R1	A15	5	3	0	1
02-01-03-01-01-01-16.mp4	VO	Speech	Happy	Normal	Kids	R1	A16	3	3	1	1
02-01-03-01-01-01-17.mp4	VO	Speech	Happy	Normal	Kids	R1	A17	3	1	1	0
02-01-03-01-01-01-18.mp4	VO	Speech	Happy	Normal	Kids	R1	A18	3	3	1	1
02-01-03-01-01-01-19.mp4	VO	Speech	Happy	Normal	Kids	R1	A19	3	2	1	0
02-01-03-01-01-01-20.mp4	VO	Speech	Happy	Normal	Kids	R1	A20	3	3	1	1
02-01-03-01-01-01-21.mp4	VO	Speech	Happy	Normal	Kids	R1	A21	3	3	1	1
02-01-03-01-01-01-22.mp4	VO	Speech	Happy	Normal	Kids	R1	A22	3	3	1	1
02-01-03-01-01-01-23.mp4	VO	Speech	Happy	Normal	Kids	R1	A23	8	3	0	1
02-01-03-01-01-01-24.mp4	VO	Speech	Happy	Normal	Kids	R1	A24	3	3	1	1
02-01-03-01-01-02-01.mp4	VO	Speech	Happy	Normal	Kids	R2	A1	2	2	0	0
02-01-03-01-01-02-02.mp4	VO	Speech	Happy	Normal	Kids	R2	A2	2	2	0	0
02-01-03-01-01-02-03.mp4	VO	Speech	Happy	Normal	Kids	R2	A3	4	4	0	0
02-01-03-01-01-02-04.mp4	VO	Speech	Happy	Normal	Kids	R2	A4	3	3	1	1
02-01-03-01-01-02-05.mp4	VO	Speech	Happy	Normal	Kids	R2	A5	2	3	0	1
02-01-03-01-01-02-06.mp4	VO	Speech	Happy	Normal	Kids	R2	A6	3	3	1	1
02-01-03-01-01-02-07.mp4	VO	Speech	Happy	Normal	Kids	R2	A7	3	3	1	1
02-01-03-01-01-02-08.mp4	VO	Speech	Happy	Normal	Kids	R2	A8	3	3	1	1
02-01-03-01-01-02-09.mp4	VO	Speech	Happy	Normal	Kids	R2	A9	3	3	1	1
02-01-03-01-01-02-10.mp4	VO	Speech	Happy	Normal	Kids	R2	A10	3	3	1	1
02-01-03-01-01-02-11.mp4	VO	Speech	Happy	Normal	Kids	R2	A11	3	3	1	1
02-01-03-01-01-02-12.mp4	VO	Speech	Happy	Normal	Kids	R2	A12	3	3	1	1
02-01-03-01-01-02-13.mp4	VO	Speech	Happy	Normal	Kids	R2	A13	3	3	1	1
02-01-03-01-01-02-14.mp4	VO	Speech	Happy	Normal	Kids	R2	A14	3	3	1	1
02-01-03-01-01-02-15.mp4	VO	Speech	Happy	Normal	Kids	R2	A15	2	8	0	0
02-01-03-01-01-02-16.mp4	VO	Speech	Happy	Normal	Kids	R2	A16	2	3	0	1
02-01-03-01-01-02-17.mp4	VO	Speech	Happy	Normal	Kids	R2	A17	8	2	0	0
02-01-03-01-01-02-18.mp4	VO	Speech	Happy	Normal	Kids	R2	A18	4	3	0	1
02-01-03-01-01-02-19.mp4	VO	Speech	Happy	Normal	Kids	R2	A19	3	3	1	1
02-01-03-01-01-02-20.mp4	VO	Speech	Happy	Normal	Kids	R2	A20	3	3	1	1
02-01-03-01-01-02-21.mp4	VO	Speech	Happy	Normal	Kids	R2	A21	3	3	1	1
02-01-03-01-01-02-22.mp4	VO	Speech	Happy	Normal	Kids	R2	A22	3	3	1	1
02-01-03-01-01-02-23.mp4	VO	Speech	Happy	Normal	Kids	R2	A23	3	3	1	1
02-01-03-01-01-02-24.mp4	VO	Speech	Happy	Normal	Kids	R2	A24	3	3	1	1
02-01-03-01-02-01-01.mp4	VO	Speech	Happy	Normal	Dogs	R1	A1	3	3	1	1
02-01-03-01-02-01-02.mp4	VO	Speech	Happy	Normal	Dogs	R1	A2	3	3	1	1
02-01-03-01-02-01-03.mp4	VO	Speech	Happy	Normal	Dogs	R1	A3	4	4	0	0
02-01-03-01-02-01-04.mp4	VO	Speech	Happy	Normal	Dogs	R1	A4	3	3	1	1
02-01-03-01-02-01-05.mp4	VO	Speech	Happy	Normal	Dogs	R1	A5	3	3	1	1
02-01-03-01-02-01-06.mp4	VO	Speech	Happy	Normal	Dogs	R1	A6	3	3	1	1
02-01-03-01-02-01-07.mp4	VO	Speech	Happy	Normal	Dogs	R1	A7	3	3	1	1
02-01-03-01-02-01-08.mp4	VO	Speech	Happy	Normal	Dogs	R1	A8	3	3	1	1
02-01-03-01-02-01-09.mp4	VO	Speech	Happy	Normal	Dogs	R1	A9	3	2	1	0
02-01-03-01-02-01-10.mp4	VO	Speech	Happy	Normal	Dogs	R1	A10	3	3	1	1
02-01-03-01-02-01-11.mp4	VO	Speech	Happy	Normal	Dogs	R1	A11	3	2	1	0
02-01-03-01-02-01-12.mp4	VO	Speech	Happy	Normal	Dogs	R1	A12	3	3	1	1
02-01-03-01-02-01-13.mp4	VO	Speech	Happy	Normal	Dogs	R1	A13	3	3	1	1
02-01-03-01-02-01-14.mp4	VO	Speech	Happy	Normal	Dogs	R1	A14	3	3	1	1
02-01-03-01-02-01-15.mp4	VO	Speech	Happy	Normal	Dogs	R1	A15	1	3	0	1
02-01-03-01-02-01-16.mp4	VO	Speech	Happy	Normal	Dogs	R1	A16	3	3	1	1
02-01-03-01-02-01-17.mp4	VO	Speech	Happy	Normal	Dogs	R1	A17	3	3	1	1
02-01-03-01-02-01-18.mp4	VO	Speech	Happy	Normal	Dogs	R1	A18	3	3	1	1
02-01-03-01-02-01-19.mp4	VO	Speech	Happy	Normal	Dogs	R1	A19	3	3	1	1
02-01-03-01-02-01-20.mp4	VO	Speech	Happy	Normal	Dogs	R1	A20	3	3	1	1
02-01-03-01-02-01-21.mp4	VO	Speech	Happy	Normal	Dogs	R1	A21	3	3	1	1
02-01-03-01-02-01-22.mp4	VO	Speech	Happy	Normal	Dogs	R1	A22	9	9	0	0
02-01-03-01-02-01-23.mp4	VO	Speech	Happy	Normal	Dogs	R1	A23	3	3	1	1
02-01-03-01-02-01-24.mp4	VO	Speech	Happy	Normal	Dogs	R1	A24	3	3	1	1
02-01-03-01-02-02-01.mp4	VO	Speech	Happy	Normal	Dogs	R2	A1	3	3	1	1
02-01-03-01-02-02-02.mp4	VO	Speech	Happy	Normal	Dogs	R2	A2	3	3	1	1
02-01-03-01-02-02-03.mp4	VO	Speech	Happy	Normal	Dogs	R2	A3	3	3	1	1
02-01-03-01-02-02-04.mp4	VO	Speech	Happy	Normal	Dogs	R2	A4	3	3	1	1
02-01-03-01-02-02-05.mp4	VO	Speech	Happy	Normal	Dogs	R2	A5	3	3	1	1
02-01-03-01-02-02-06.mp4	VO	Speech	Happy	Normal	Dogs	R2	A6	3	3	1	1
02-01-03-01-02-02-07.mp4	VO	Speech	Happy	Normal	Dogs	R2	A7	3	3	1	1
02-01-03-01-02-02-08.mp4	VO	Speech	Happy	Normal	Dogs	R2	A8	3	3	1	1
02-01-03-01-02-02-09.mp4	VO	Speech	Happy	Normal	Dogs	R2	A9	3	3	1	1
02-01-03-01-02-02-10.mp4	VO	Speech	Happy	Normal	Dogs	R2	A10	3	3	1	1
02-01-03-01-02-02-11.mp4	VO	Speech	Happy	Normal	Dogs	R2	A11	2	1	0	0
02-01-03-01-02-02-12.mp4	VO	Speech	Happy	Normal	Dogs	R2	A12	3	3	1	1
02-01-03-01-02-02-13.mp4	VO	Speech	Happy	Normal	Dogs	R2	A13	3	3	1	1
02-01-03-01-02-02-14.mp4	VO	Speech	Happy	Normal	Dogs	R2	A14	3	3	1	1
02-01-03-01-02-02-15.mp4	VO	Speech	Happy	Normal	Dogs	R2	A15	4	3	0	1
02-01-03-01-02-02-16.mp4	VO	Speech	Happy	Normal	Dogs	R2	A16	3	3	1	1
02-01-03-01-02-02-17.mp4	VO	Speech	Happy	Normal	Dogs	R2	A17	9	1	0	0
02-01-03-01-02-02-18.mp4	VO	Speech	Happy	Normal	Dogs	R2	A18	3	3	1	1
02-01-03-01-02-02-19.mp4	VO	Speech	Happy	Normal	Dogs	R2	A19	3	3	1	1
02-01-03-01-02-02-20.mp4	VO	Speech	Happy	Normal	Dogs	R2	A20	2	3	0	1
02-01-03-01-02-02-21.mp4	VO	Speech	Happy	Normal	Dogs	R2	A21	3	3	1	1
02-01-03-01-02-02-22.mp4	VO	Speech	Happy	Normal	Dogs	R2	A22	3	3	1	1
02-01-03-01-02-02-23.mp4	VO	Speech	Happy	Normal	Dogs	R2	A23	3	3	1	1
02-01-03-01-02-02-24.mp4	VO	Speech	Happy	Normal	Dogs	R2	A24	3	3	1	1
02-01-03-02-01-01-01.mp4	VO	Speech	Happy	Strong	Kids	R1	A1	3	3	1	1
02-01-03-02-01-01-02.mp4	VO	Speech	Happy	Strong	Kids	R1	A2	3	3	1	1
02-01-03-02-01-01-03.mp4	VO	Speech	Happy	Strong	Kids	R1	A3	3	3	1	1
02-01-03-02-01-01-04.mp4	VO	Speech	Happy	Strong	Kids	R1	A4	3	3	1	1
02-01-03-02-01-01-05.mp4	VO	Speech	Happy	Strong	Kids	R1	A5	3	3	1	1
02-01-03-02-01-01-06.mp4	VO	Speech	Happy	Strong	Kids	R1	A6	3	3	1	1
02-01-03-02-01-01-07.mp4	VO	Speech	Happy	Strong	Kids	R1	A7	3	3	1	1
02-01-03-02-01-01-08.mp4	VO	Speech	Happy	Strong	Kids	R1	A8	3	3	1	1
02-01-03-02-01-01-09.mp4	VO	Speech	Happy	Strong	Kids	R1	A9	3	3	1	1
02-01-03-02-01-01-10.mp4	VO	Speech	Happy	Strong	Kids	R1	A10	3	3	1	1
02-01-03-02-01-01-11.mp4	VO	Speech	Happy	Strong	Kids	R1	A11	3	3	1	1
02-01-03-02-01-01-12.mp4	VO	Speech	Happy	Strong	Kids	R1	A12	3	3	1	1
02-01-03-02-01-01-13.mp4	VO	Speech	Happy	Strong	Kids	R1	A13	3	3	1	1
02-01-03-02-01-01-14.mp4	VO	Speech	Happy	Strong	Kids	R1	A14	3	3	1	1
02-01-03-02-01-01-15.mp4	VO	Speech	Happy	Strong	Kids	R1	A15	4	3	0	1
02-01-03-02-01-01-16.mp4	VO	Speech	Happy	Strong	Kids	R1	A16	3	3	1	1
02-01-03-02-01-01-17.mp4	VO	Speech	Happy	Strong	Kids	R1	A17	8	8	0	0
02-01-03-02-01-01-18.mp4	VO	Speech	Happy	Strong	Kids	R1	A18	3	3	1	1
02-01-03-02-01-01-19.mp4	VO	Speech	Happy	Strong	Kids	R1	A19	3	3	1	1
02-01-03-02-01-01-20.mp4	VO	Speech	Happy	Strong	Kids	R1	A20	3	3	1	1
02-01-03-02-01-01-21.mp4	VO	Speech	Happy	Strong	Kids	R1	A21	4	3	0	1
02-01-03-02-01-01-22.mp4	VO	Speech	Happy	Strong	Kids	R1	A22	3	3	1	1
02-01-03-02-01-01-23.mp4	VO	Speech	Happy	Strong	Kids	R1	A23	3	3	1	1
02-01-03-02-01-01-24.mp4	VO	Speech	Happy	Strong	Kids	R1	A24	3	3	1	1
02-01-03-02-01-02-01.mp4	VO	Speech	Happy	Strong	Kids	R2	A1	3	3	1	1
02-01-03-02-01-02-02.mp4	VO	Speech	Happy	Strong	Kids	R2	A2	3	3	1	1
02-01-03-02-01-02-03.mp4	VO	Speech	Happy	Strong	Kids	R2	A3	5	5	0	0
02-01-03-02-01-02-04.mp4	VO	Speech	Happy	Strong	Kids	R2	A4	3	3	1	1
02-01-03-02-01-02-05.mp4	VO	Speech	Happy	Strong	Kids	R2	A5	3	3	1	1
02-01-03-02-01-02-06.mp4	VO	Speech	Happy	Strong	Kids	R2	A6	3	3	1	1
02-01-03-02-01-02-07.mp4	VO	Speech	Happy	Strong	Kids	R2	A7	8	3	0	1
02-01-03-02-01-02-08.mp4	VO	Speech	Happy	Strong	Kids	R2	A8	3	3	1	1
02-01-03-02-01-02-09.mp4	VO	Speech	Happy	Strong	Kids	R2	A9	3	3	1	1
02-01-03-02-01-02-10.mp4	VO	Speech	Happy	Strong	Kids	R2	A10	3	3	1	1
02-01-03-02-01-02-11.mp4	VO	Speech	Happy	Strong	Kids	R2	A11	3	3	1	1
02-01-03-02-01-02-12.mp4	VO	Speech	Happy	Strong	Kids	R2	A12	3	3	1	1
02-01-03-02-01-02-13.mp4	VO	Speech	Happy	Strong	Kids	R2	A13	3	3	1	1
02-01-03-02-01-02-14.mp4	VO	Speech	Happy	Strong	Kids	R2	A14	3	8	1	0
02-01-03-02-01-02-15.mp4	VO	Speech	Happy	Strong	Kids	R2	A15	3	3	1	1
02-01-03-02-01-02-16.mp4	VO	Speech	Happy	Strong	Kids	R2	A16	3	3	1	1
02-01-03-02-01-02-17.mp4	VO	Speech	Happy	Strong	Kids	R2	A17	3	3	1	1
02-01-03-02-01-02-18.mp4	VO	Speech	Happy	Strong	Kids	R2	A18	3	3	1	1
02-01-03-02-01-02-19.mp4	VO	Speech	Happy	Strong	Kids	R2	A19	3	3	1	1
02-01-03-02-01-02-20.mp4	VO	Speech	Happy	Strong	Kids	R2	A20	3	3	1	1
02-01-03-02-01-02-21.mp4	VO	Speech	Happy	Strong	Kids	R2	A21	3	3	1	1
02-01-03-02-01-02-22.mp4	VO	Speech	Happy	Strong	Kids	R2	A22	3	3	1	1
02-01-03-02-01-02-23.mp4	VO	Speech	Happy	Strong	Kids	R2	A23	3	3	1	1
02-01-03-02-01-02-24.mp4	VO	Speech	Happy	Strong	Kids	R2	A24	3	3	1	1
02-01-03-02-02-01-01.mp4	VO	Speech	Happy	Strong	Dogs	R1	A1	3	3	1	1
02-01-03-02-02-01-02.mp4	VO	Speech	Happy	Strong	Dogs	R1	A2	3	3	1	1
02-01-03-02-02-01-03.mp4	VO	Speech	Happy	Strong	Dogs	R1	A3	4	9	0	0
02-01-03-02-02-01-04.mp4	VO	Speech	Happy	Strong	Dogs	R1	A4	3	3	1	1
02-01-03-02-02-01-05.mp4	VO	Speech	Happy	Strong	Dogs	R1	A5	3	8	1	0
02-01-03-02-02-01-06.mp4	VO	Speech	Happy	Strong	Dogs	R1	A6	3	3	1	1
02-01-03-02-02-01-07.mp4	VO	Speech	Happy	Strong	Dogs	R1	A7	3	3	1	1
02-01-03-02-02-01-08.mp4	VO	Speech	Happy	Strong	Dogs	R1	A8	3	3	1	1
02-01-03-02-02-01-09.mp4	VO	Speech	Happy	Strong	Dogs	R1	A9	3	3	1	1
02-01-03-02-02-01-10.mp4	VO	Speech	Happy	Strong	Dogs	R1	A10	3	3	1	1
02-01-03-02-02-01-11.mp4	VO	Speech	Happy	Strong	Dogs	R1	A11	3	3	1	1
02-01-03-02-02-01-12.mp4	VO	Speech	Happy	Strong	Dogs	R1	A12	3	3	1	1
02-01-03-02-02-01-13.mp4	VO	Speech	Happy	Strong	Dogs	R1	A13	3	3	1	1
02-01-03-02-02-01-14.mp4	VO	Speech	Happy	Strong	Dogs	R1	A14	3	3	1	1
02-01-03-02-02-01-15.mp4	VO	Speech	Happy	Strong	Dogs	R1	A15	3	3	1	1
02-01-03-02-02-01-16.mp4	VO	Speech	Happy	Strong	Dogs	R1	A16	3	3	1	1
02-01-03-02-02-01-17.mp4	VO	Speech	Happy	Strong	Dogs	R1	A17	8	8	0	0
02-01-03-02-02-01-18.mp4	VO	Speech	Happy	Strong	Dogs	R1	A18	3	3	1	1
02-01-03-02-02-01-19.mp4	VO	Speech	Happy	Strong	Dogs	R1	A19	3	3	1	1
02-01-03-02-02-01-20.mp4	VO	Speech	Happy	Strong	Dogs	R1	A20	8	8	0	0
02-01-03-02-02-01-21.mp4	VO	Speech	Happy	Strong	Dogs	R1	A21	3	3	1	1
02-01-03-02-02-01-22.mp4	VO	Speech	Happy	Strong	Dogs	R1	A22	3	3	1	1
02-01-03-02-02-01-23.mp4	VO	Speech	Happy	Strong	Dogs	R1	A23	8	8	0	0
02-01-03-02-02-01-24.mp4	VO	Speech	Happy	Strong	Dogs	R1	A24	3	3	1	1
02-01-03-02-02-02-01.mp4	VO	Speech	Happy	Strong	Dogs	R2	A1	3	3	1	1
02-01-03-02-02-02-02.mp4	VO	Speech	Happy	Strong	Dogs	R2	A2	3	3	1	1
02-01-03-02-02-02-03.mp4	VO	Speech	Happy	Strong	Dogs	R2	A3	3	3	1	1
02-01-03-02-02-02-04.mp4	VO	Speech	Happy	Strong	Dogs	R2	A4	3	3	1	1
02-01-03-02-02-02-05.mp4	VO	Speech	Happy	Strong	Dogs	R2	A5	3	4	1	0
02-01-03-02-02-02-06.mp4	VO	Speech	Happy	Strong	Dogs	R2	A6	3	3	1	1
02-01-03-02-02-02-07.mp4	VO	Speech	Happy	Strong	Dogs	R2	A7	3	3	1	1
02-01-03-02-02-02-08.mp4	VO	Speech	Happy	Strong	Dogs	R2	A8	3	3	1	1
02-01-03-02-02-02-09.mp4	VO	Speech	Happy	Strong	Dogs	R2	A9	3	3	1	1
02-01-03-02-02-02-10.mp4	VO	Speech	Happy	Strong	Dogs	R2	A10	3	3	1	1
02-01-03-02-02-02-11.mp4	VO	Speech	Happy	Strong	Dogs	R2	A11	3	3	1	1
02-01-03-02-02-02-12.mp4	VO	Speech	Happy	Strong	Dogs	R2	A12	3	3	1	1
02-01-03-02-02-02-13.mp4	VO	Speech	Happy	Strong	Dogs	R2	A13	3	3	1	1
02-01-03-02-02-02-14.mp4	VO	Speech	Happy	Strong	Dogs	R2	A14	3	3	1	1
02-01-03-02-02-02-15.mp4	VO	Speech	Happy	Strong	Dogs	R2	A15	3	3	1	1
02-01-03-02-02-02-16.mp4	VO	Speech	Happy	Strong	Dogs	R2	A16	3	3	1	1
02-01-03-02-02-02-17.mp4	VO	Speech	Happy	Strong	Dogs	R2	A17	3	3	1	1
02-01-03-02-02-02-18.mp4	VO	Speech	Happy	Strong	Dogs	R2	A18	3	3	1	1
02-01-03-02-02-02-19.mp4	VO	Speech	Happy	Strong	Dogs	R2	A19	9	3	0	1
02-01-03-02-02-02-20.mp4	VO	Speech	Happy	Strong	Dogs	R2	A20	3	8	1	0
02-01-03-02-02-02-21.mp4	VO	Speech	Happy	Strong	Dogs	R2	A21	3	3	1	1
02-01-03-02-02-02-22.mp4	VO	Speech	Happy	Strong	Dogs	R2	A22	3	3	1	1
02-01-03-02-02-02-23.mp4	VO	Speech	Happy	Strong	Dogs	R2	A23	3	3	1	1
02-01-03-02-02-02-24.mp4	VO	Speech	Happy	Strong	Dogs	R2	A24	3	3	1	1
02-01-04-01-01-01-01.mp4	VO	Speech	Sad	Normal	Kids	R1	A1	4	4	1	1
02-01-04-01-01-01-02.mp4	VO	Speech	Sad	Normal	Kids	R1	A2	5	5	0	0
02-01-04-01-01-01-03.mp4	VO	Speech	Sad	Normal	Kids	R1	A3	4	4	1	1
02-01-04-01-01-01-04.mp4	VO	Speech	Sad	Normal	Kids	R1	A4	4	5	1	0
02-01-04-01-01-01-05.mp4	VO	Speech	Sad	Normal	Kids	R1	A5	4	2	1	0
02-01-04-01-01-01-06.mp4	VO	Speech	Sad	Normal	Kids	R1	A6	4	4	1	1
02-01-04-01-01-01-07.mp4	VO	Speech	Sad	Normal	Kids	R1	A7	4	1	1	0
02-01-04-01-01-01-08.mp4	VO	Speech	Sad	Normal	Kids	R1	A8	4	4	1	1
02-01-04-01-01-01-09.mp4	VO	Speech	Sad	Normal	Kids	R1	A9	7	1	0	0
02-01-04-01-01-01-10.mp4	VO	Speech	Sad	Normal	Kids	R1	A10	4	4	1	1
02-01-04-01-01-01-11.mp4	VO	Speech	Sad	Normal	Kids	R1	A11	1	1	0	0
02-01-04-01-01-01-12.mp4	VO	Speech	Sad	Normal	Kids	R1	A12	4	4	1	1
02-01-04-01-01-01-13.mp4	VO	Speech	Sad	Normal	Kids	R1	A13	5	5	0	0
02-01-04-01-01-01-14.mp4	VO	Speech	Sad	Normal	Kids	R1	A14	5	4	0	1
02-01-04-01-01-01-15.mp4	VO	Speech	Sad	Normal	Kids	R1	A15	4	4	1	1
02-01-04-01-01-01-16.mp4	VO	Speech	Sad	Normal	Kids	R1	A16	3	3	0	0
02-01-04-01-01-01-17.mp4	VO	Speech	Sad	Normal	Kids	R1	A17	1	1	0	0
02-01-04-01-01-01-18.mp4	VO	Speech	Sad	Normal	Kids	R1	A18	4	4	1	1
02-01-04-01-01-01-19.mp4	VO	Speech	Sad	Normal	Kids	R1	A19	4	4	1	1
02-01-04-01-01-01-20.mp4	VO	Speech	Sad	Normal	Kids	R1	A20	1	1	0	0
02-01-04-01-01-01-21.mp4	VO	Speech	Sad	Normal	Kids	R1	A21	7	7	0	0
02-01-04-01-01-01-22.mp4	VO	Speech	Sad	Normal	Kids	R1	A22	2	1	0	0
02-01-04-01-01-01-23.mp4	VO	Speech	Sad	Normal	Kids	R1	A23	2	2	0	0
02-01-04-01-01-01-24.mp4	VO	Speech	Sad	Normal	Kids	R1	A24	4	4	1	1
02-01-04-01-01-02-01.mp4	VO	Speech	Sad	Normal	Kids	R2	A1	4	4	1	1
02-01-04-01-01-02-02.mp4	VO	Speech	Sad	Normal	Kids	R2	A2	4	4	1	1
02-01-04-01-01-02-03.mp4	VO	Speech	Sad	Normal	Kids	R2	A3	4	4	1	1
02-01-04-01-01-02-04.mp4	VO	Speech	Sad	Normal	Kids	R2	A4	4	4	1	1
02-01-04-01-01-02-05.mp4	VO	Speech	Sad	Normal	Kids	R2	A5	1	1	0	0
02-01-04-01-01-02-06.mp4	VO	Speech	Sad	Normal	Kids	R2	A6	4	4	1	1
02-01-04-01-01-02-07.mp4	VO	Speech	Sad	Normal	Kids	R2	A7	3	4	0	1
02-01-04-01-01-02-08.mp4	VO	Speech	Sad	Normal	Kids	R2	A8	1	9	0	0
02-01-04-01-01-02-09.mp4	VO	Speech	Sad	Normal	Kids	R2	A9	4	4	1	1
02-01-04-01-01-02-10.mp4	VO	Speech	Sad	Normal	Kids	R2	A10	4	4	1	1
02-01-04-01-01-02-11.mp4	VO	Speech	Sad	Normal	Kids	R2	A11	1	1	0	0
02-01-04-01-01-02-12.mp4	VO	Speech	Sad	Normal	Kids	R2	A12	4	4	1	1
02-01-04-01-01-02-13.mp4	VO	Speech	Sad	Normal	Kids	R2	A13	7	7	0	0
02-01-04-01-01-02-14.mp4	VO	Speech	Sad	Normal	Kids	R2	A14	6	6	0	0
02-01-04-01-01-02-15.mp4	VO	Speech	Sad	Normal	Kids	R2	A15	1	1	0	0
02-01-04-01-01-02-16.mp4	VO	Speech	Sad	Normal	Kids	R2	A16	3	3	0	0
02-01-04-01-01-02-17.mp4	VO	Speech	Sad	Normal	Kids	R2	A17	1	1	0	0
02-01-04-01-01-02-18.mp4	VO	Speech	Sad	Normal	Kids	R2	A18	4	4	1	1
02-01-04-01-01-02-19.mp4	VO	Speech	Sad	Normal	Kids	R2	A19	5	4	0	1
02-01-04-01-01-02-20.mp4	VO	Speech	Sad	Normal	Kids	R2	A20	2	2	0	0
02-01-04-01-01-02-21.mp4	VO	Speech	Sad	Normal	Kids	R2	A21	7	7	0	0
02-01-04-01-01-02-22.mp4	VO	Speech	Sad	Normal	Kids	R2	A22	1	7	0	0
02-01-04-01-01-02-23.mp4	VO	Speech	Sad	Normal	Kids	R2	A23	9	7	0	0
02-01-04-01-01-02-24.mp4	VO	Speech	Sad	Normal	Kids	R2	A24	4	4	1	1
02-01-04-01-02-01-01.mp4	VO	Speech	Sad	Normal	Dogs	R1	A1	2	2	0	0
02-01-04-01-02-01-02.mp4	VO	Speech	Sad	Normal	Dogs	R1	A2	5	5	0	0
02-01-04-01-02-01-03.mp4	VO	Speech	Sad	Normal	Dogs	R1	A3	4	4	1	1
02-01-04-01-02-01-04.mp4	VO	Speech	Sad	Normal	Dogs	R1	A4	5	4	0	1
02-01-04-01-02-01-05.mp4	VO	Speech	Sad	Normal	Dogs	R1	A5	4	4	1	1
02-01-04-01-02-01-06.mp4	VO	Speech	Sad	Normal	Dogs	R1	A6	4	4	1	1
02-01-04-01-02-01-07.mp4	VO	Speech	Sad	Normal	Dogs	R1	A7	4	4	1	1
02-01-04-01-02-01-08.mp4	VO	Speech	Sad	Normal	Dogs	R1	A8	1	1	0	0
02-01-04-01-02-01-09.mp4	VO	Speech	Sad	Normal	Dogs	R1	A9	4	4	1	1
02-01-04-01-02-01-10.mp4	VO	Speech	Sad	Normal	Dogs	R1	A10	4	4	1	1
02-01-04-01-02-01-11.mp4	VO	Speech	Sad	Normal	Dogs	R1	A11	5	1	0	0
02-01-04-01-02-01-12.mp4	VO	Speech	Sad	Normal	Dogs	R1	A12	4	4	1	1
02-01-04-01-02-01-13.mp4	VO	Speech	Sad	Normal	Dogs	R1	A13	4	4	1	1
02-01-04-01-02-01-14.mp4	VO	Speech	Sad	Normal	Dogs	R1	A14	4	6	1	0
02-01-04-01-02-01-15.mp4	VO	Speech	Sad	Normal	Dogs	R1	A15	1	1	0	0
02-01-04-01-02-01-16.mp4	VO	Speech	Sad	Normal	Dogs	R1	A16	4	4	1	1
02-01-04-01-02-01-17.mp4	VO	Speech	Sad	Normal	Dogs	R1	A17	4	4	1	1
02-01-04-01-02-01-18.mp4	VO	Speech	Sad	Normal	Dogs	R1	A18	4	4	1	1
02-01-04-01-02-01-19.mp4	VO	Speech	Sad	Normal	Dogs	R1	A19	4	4	1	1
02-01-04-01-02-01-20.mp4	VO	Speech	Sad	Normal	Dogs	R1	A20	2	4	0	1
02-01-04-01-02-01-21.mp4	VO	Speech	Sad	Normal	Dogs	R1	A21	1	1	0	0
02-01-04-01-02-01-22.mp4	VO	Speech	Sad	Normal	Dogs	R1	A22	1	6	0	0
02-01-04-01-02-01-23.mp4	VO	Speech	Sad	Normal	Dogs	R1	A23	9	4	0	1
02-01-04-01-02-01-24.mp4	VO	Speech	Sad	Normal	Dogs	R1	A24	4	4	1	1
02-01-04-01-02-02-01.mp4	VO	Speech	Sad	Normal	Dogs	R2	A1	2	2	0	0
02-01-04-01-02-02-02.mp4	VO	Speech	Sad	Normal	Dogs	R2	A2	9	5	0	0
02-01-04-01-02-02-03.mp4	VO	Speech	Sad	Normal	Dogs	R2	A3	4	4	1	1
02-01-04-01-02-02-04.mp4	VO	Speech	Sad	Normal	Dogs	R2	A4	4	5	1	0
02-01-04-01-02-02-05.mp4	VO	Speech	Sad	Normal	Dogs	R2	A5	4	4	1	1
02-01-04-01-02-02-06.mp4	VO	Speech	Sad	Normal	Dogs	R2	A6	4	4	1	1
[truncated: 2,322 more rows]

## Sheet: Song
	Independent Variables							Dependent Variables
Filename	Modality	Channel	Emotion	Intensity	Statement	Repetition	Actor	Category Time1	Category Time2	Correct Time1	Correct Time2
01-02-01-01-01-01-01.mp4	AV	Song	Neutral	Normal	Kids	R1	A1	2	1	1	1
01-02-01-01-01-01-02.mp4	AV	Song	Neutral	Normal	Kids	R1	A2	1	1	1	1
01-02-01-01-01-01-03.mp4	AV	Song	Neutral	Normal	Kids	R1	A3	4	4	0	0
01-02-01-01-01-01-04.mp4	AV	Song	Neutral	Normal	Kids	R1	A4	1	1	1	1
01-02-01-01-01-01-05.mp4	AV	Song	Neutral	Normal	Kids	R1	A5	2	1	1	1
01-02-01-01-01-01-06.mp4	AV	Song	Neutral	Normal	Kids	R1	A6	3	1	0	1
01-02-01-01-01-01-07.mp4	AV	Song	Neutral	Normal	Kids	R1	A7	1	1	1	1
01-02-01-01-01-01-08.mp4	AV	Song	Neutral	Normal	Kids	R1	A8	4	2	0	1
01-02-01-01-01-01-09.mp4	AV	Song	Neutral	Normal	Kids	R1	A9	1	1	1	1
01-02-01-01-01-01-10.mp4	AV	Song	Neutral	Normal	Kids	R1	A10	1	4	1	0
01-02-01-01-01-01-11.mp4	AV	Song	Neutral	Normal	Kids	R1	A11	5	2	0	1
01-02-01-01-01-01-12.mp4	AV	Song	Neutral	Normal	Kids	R1	A12	6	2	0	1
01-02-01-01-01-01-13.mp4	AV	Song	Neutral	Normal	Kids	R1	A13	1	1	1	1
01-02-01-01-01-01-14.mp4	AV	Song	Neutral	Normal	Kids	R1	A14	2	1	1	1
01-02-01-01-01-01-15.mp4	AV	Song	Neutral	Normal	Kids	R1	A15	1	2	1	1
01-02-01-01-01-01-16.mp4	AV	Song	Neutral	Normal	Kids	R1	A16	1	1	1	1
01-02-01-01-01-01-17.mp4	AV	Song	Neutral	Normal	Kids	R1	A17	1	1	1	1
01-02-01-01-01-01-19.mp4	AV	Song	Neutral	Normal	Kids	R1	A19	1	1	1	1
01-02-01-01-01-01-20.mp4	AV	Song	Neutral	Normal	Kids	R1	A20	2	2	1	1
01-02-01-01-01-01-21.mp4	AV	Song	Neutral	Normal	Kids	R1	A21	1	1	1	1
01-02-01-01-01-01-22.mp4	AV	Song	Neutral	Normal	Kids	R1	A22	1	2	1	1
01-02-01-01-01-01-23.mp4	AV	Song	Neutral	Normal	Kids	R1	A23	2	1	1	1
01-02-01-01-01-01-24.mp4	AV	Song	Neutral	Normal	Kids	R1	A24	2	2	1	1
01-02-01-01-01-02-01.mp4	AV	Song	Neutral	Normal	Kids	R2	A1	1	1	1	1
01-02-01-01-01-02-02.mp4	AV	Song	Neutral	Normal	Kids	R2	A2	1	1	1	1
01-02-01-01-01-02-03.mp4	AV	Song	Neutral	Normal	Kids	R2	A3	1	4	1	0
01-02-01-01-01-02-04.mp4	AV	Song	Neutral	Normal	Kids	R2	A4	1	1	1	1
01-02-01-01-01-02-05.mp4	AV	Song	Neutral	Normal	Kids	R2	A5	1	1	1	1
01-02-01-01-01-02-06.mp4	AV	Song	Neutral	Normal	Kids	R2	A6	3	2	0	1
01-02-01-01-01-02-07.mp4	AV	Song	Neutral	Normal	Kids	R2	A7	1	1	1	1
01-02-01-01-01-02-08.mp4	AV	Song	Neutral	Normal	Kids	R2	A8	1	2	1	1
01-02-01-01-01-02-09.mp4	AV	Song	Neutral	Normal	Kids	R2	A9	1	1	1	1
01-02-01-01-01-02-10.mp4	AV	Song	Neutral	Normal	Kids	R2	A10	1	1	1	1
01-02-01-01-01-02-11.mp4	AV	Song	Neutral	Normal	Kids	R2	A11	3	3	0	0
01-02-01-01-01-02-12.mp4	AV	Song	Neutral	Normal	Kids	R2	A12	4	4	0	0
01-02-01-01-01-02-13.mp4	AV	Song	Neutral	Normal	Kids	R2	A13	1	1	1	1
01-02-01-01-01-02-14.mp4	AV	Song	Neutral	Normal	Kids	R2	A14	1	1	1	1
01-02-01-01-01-02-15.mp4	AV	Song	Neutral	Normal	Kids	R2	A15	1	1	1	1
01-02-01-01-01-02-16.mp4	AV	Song	Neutral	Normal	Kids	R2	A16	1	5	1	0
01-02-01-01-01-02-17.mp4	AV	Song	Neutral	Normal	Kids	R2	A17	1	1	1	1
01-02-01-01-01-02-19.mp4	AV	Song	Neutral	Normal	Kids	R2	A19	4	6	0	0
01-02-01-01-01-02-20.mp4	AV	Song	Neutral	Normal	Kids	R2	A20	1	2	1	1
01-02-01-01-01-02-21.mp4	AV	Song	Neutral	Normal	Kids	R2	A21	1	1	1	1
01-02-01-01-01-02-22.mp4	AV	Song	Neutral	Normal	Kids	R2	A22	1	1	1	1
01-02-01-01-01-02-23.mp4	AV	Song	Neutral	Normal	Kids	R2	A23	2	2	1	1
01-02-01-01-01-02-24.mp4	AV	Song	Neutral	Normal	Kids	R2	A24	4	1	0	1
01-02-01-01-02-01-01.mp4	AV	Song	Neutral	Normal	Dogs	R1	A1	1	1	1	1
01-02-01-01-02-01-02.mp4	AV	Song	Neutral	Normal	Dogs	R1	A2	2	1	1	1
01-02-01-01-02-01-03.mp4	AV	Song	Neutral	Normal	Dogs	R1	A3	4	4	0	0
01-02-01-01-02-01-04.mp4	AV	Song	Neutral	Normal	Dogs	R1	A4	2	2	1	1
01-02-01-01-02-01-05.mp4	AV	Song	Neutral	Normal	Dogs	R1	A5	2	1	1	1
01-02-01-01-02-01-06.mp4	AV	Song	Neutral	Normal	Dogs	R1	A6	2	1	1	1
01-02-01-01-02-01-07.mp4	AV	Song	Neutral	Normal	Dogs	R1	A7	1	1	1	1
01-02-01-01-02-01-08.mp4	AV	Song	Neutral	Normal	Dogs	R1	A8	1	1	1	1
01-02-01-01-02-01-09.mp4	AV	Song	Neutral	Normal	Dogs	R1	A9	1	1	1	1
01-02-01-01-02-01-10.mp4	AV	Song	Neutral	Normal	Dogs	R1	A10	4	4	0	0
01-02-01-01-02-01-11.mp4	AV	Song	Neutral	Normal	Dogs	R1	A11	1	1	1	1
01-02-01-01-02-01-12.mp4	AV	Song	Neutral	Normal	Dogs	R1	A12	4	1	0	1
01-02-01-01-02-01-13.mp4	AV	Song	Neutral	Normal	Dogs	R1	A13	1	1	1	1
01-02-01-01-02-01-14.mp4	AV	Song	Neutral	Normal	Dogs	R1	A14	1	2	1	1
01-02-01-01-02-01-15.mp4	AV	Song	Neutral	Normal	Dogs	R1	A15	1	1	1	1
01-02-01-01-02-01-16.mp4	AV	Song	Neutral	Normal	Dogs	R1	A16	1	1	1	1
01-02-01-01-02-01-17.mp4	AV	Song	Neutral	Normal	Dogs	R1	A17	4	4	0	0
01-02-01-01-02-01-19.mp4	AV	Song	Neutral	Normal	Dogs	R1	A19	1	1	1	1
01-02-01-01-02-01-20.mp4	AV	Song	Neutral	Normal	Dogs	R1	A20	1	1	1	1
01-02-01-01-02-01-21.mp4	AV	Song	Neutral	Normal	Dogs	R1	A21	1	1	1	1
01-02-01-01-02-01-22.mp4	AV	Song	Neutral	Normal	Dogs	R1	A22	4	4	0	0
01-02-01-01-02-01-23.mp4	AV	Song	Neutral	Normal	Dogs	R1	A23	1	2	1	1
01-02-01-01-02-01-24.mp4	AV	Song	Neutral	Normal	Dogs	R1	A24	9	1	0	1
01-02-01-01-02-02-01.mp4	AV	Song	Neutral	Normal	Dogs	R2	A1	2	2	1	1
01-02-01-01-02-02-02.mp4	AV	Song	Neutral	Normal	Dogs	R2	A2	1	1	1	1
01-02-01-01-02-02-03.mp4	AV	Song	Neutral	Normal	Dogs	R2	A3	2	2	1	1
01-02-01-01-02-02-04.mp4	AV	Song	Neutral	Normal	Dogs	R2	A4	2	2	1	1
01-02-01-01-02-02-05.mp4	AV	Song	Neutral	Normal	Dogs	R2	A5	1	2	1	1
01-02-01-01-02-02-06.mp4	AV	Song	Neutral	Normal	Dogs	R2	A6	2	2	1	1
01-02-01-01-02-02-07.mp4	AV	Song	Neutral	Normal	Dogs	R2	A7	1	2	1	1
01-02-01-01-02-02-08.mp4	AV	Song	Neutral	Normal	Dogs	R2	A8	1	2	1	1
01-02-01-01-02-02-09.mp4	AV	Song	Neutral	Normal	Dogs	R2	A9	1	1	1	1
01-02-01-01-02-02-10.mp4	AV	Song	Neutral	Normal	Dogs	R2	A10	1	1	1	1
01-02-01-01-02-02-11.mp4	AV	Song	Neutral	Normal	Dogs	R2	A11	1	1	1	1
01-02-01-01-02-02-12.mp4	AV	Song	Neutral	Normal	Dogs	R2	A12	4	1	0	1
01-02-01-01-02-02-13.mp4	AV	Song	Neutral	Normal	Dogs	R2	A13	1	3	1	0
01-02-01-01-02-02-14.mp4	AV	Song	Neutral	Normal	Dogs	R2	A14	2	1	1	1
01-02-01-01-02-02-15.mp4	AV	Song	Neutral	Normal	Dogs	R2	A15	2	1	1	1
01-02-01-01-02-02-16.mp4	AV	Song	Neutral	Normal	Dogs	R2	A16	1	4	1	0
01-02-01-01-02-02-17.mp4	AV	Song	Neutral	Normal	Dogs	R2	A17	1	2	1	1
01-02-01-01-02-02-19.mp4	AV	Song	Neutral	Normal	Dogs	R2	A19	1	1	1	1
01-02-01-01-02-02-20.mp4	AV	Song	Neutral	Normal	Dogs	R2	A20	1	2	1	1
01-02-01-01-02-02-21.mp4	AV	Song	Neutral	Normal	Dogs	R2	A21	4	2	0	1
01-02-01-01-02-02-22.mp4	AV	Song	Neutral	Normal	Dogs	R2	A22	2	2	1	1
01-02-01-01-02-02-23.mp4	AV	Song	Neutral	Normal	Dogs	R2	A23	1	1	1	1
01-02-01-01-02-02-24.mp4	AV	Song	Neutral	Normal	Dogs	R2	A24	2	1	1	1
01-02-02-01-01-01-01.mp4	AV	Song	Calm	Normal	Kids	R1	A1	1	2	1	1
01-02-02-01-01-01-02.mp4	AV	Song	Calm	Normal	Kids	R1	A2	3	2	0	1
01-02-02-01-01-01-03.mp4	AV	Song	Calm	Normal	Kids	R1	A3	4	4	0	0
01-02-02-01-01-01-04.mp4	AV	Song	Calm	Normal	Kids	R1	A4	1	9	1	0
01-02-02-01-01-01-05.mp4	AV	Song	Calm	Normal	Kids	R1	A5	2	2	1	1
01-02-02-01-01-01-06.mp4	AV	Song	Calm	Normal	Kids	R1	A6	4	1	0	1
01-02-02-01-01-01-07.mp4	AV	Song	Calm	Normal	Kids	R1	A7	1	1	1	1
01-02-02-01-01-01-08.mp4	AV	Song	Calm	Normal	Kids	R1	A8	3	3	0	0
01-02-02-01-01-01-09.mp4	AV	Song	Calm	Normal	Kids	R1	A9	1	4	1	0
01-02-02-01-01-01-10.mp4	AV	Song	Calm	Normal	Kids	R1	A10	3	3	0	0
01-02-02-01-01-01-11.mp4	AV	Song	Calm	Normal	Kids	R1	A11	2	1	1	1
01-02-02-01-01-01-12.mp4	AV	Song	Calm	Normal	Kids	R1	A12	3	9	0	0
01-02-02-01-01-01-13.mp4	AV	Song	Calm	Normal	Kids	R1	A13	1	2	1	1
01-02-02-01-01-01-14.mp4	AV	Song	Calm	Normal	Kids	R1	A14	2	2	1	1
01-02-02-01-01-01-15.mp4	AV	Song	Calm	Normal	Kids	R1	A15	2	2	1	1
01-02-02-01-01-01-16.mp4	AV	Song	Calm	Normal	Kids	R1	A16	2	3	1	0
01-02-02-01-01-01-17.mp4	AV	Song	Calm	Normal	Kids	R1	A17	1	1	1	1
01-02-02-01-01-01-19.mp4	AV	Song	Calm	Normal	Kids	R1	A19	2	2	1	1
01-02-02-01-01-01-20.mp4	AV	Song	Calm	Normal	Kids	R1	A20	2	2	1	1
01-02-02-01-01-01-21.mp4	AV	Song	Calm	Normal	Kids	R1	A21	2	1	1	1
01-02-02-01-01-01-22.mp4	AV	Song	Calm	Normal	Kids	R1	A22	1	2	1	1
01-02-02-01-01-01-23.mp4	AV	Song	Calm	Normal	Kids	R1	A23	2	1	1	1
01-02-02-01-01-01-24.mp4	AV	Song	Calm	Normal	Kids	R1	A24	3	2	0	1
01-02-02-01-01-02-01.mp4	AV	Song	Calm	Normal	Kids	R2	A1	2	1	1	1
01-02-02-01-01-02-02.mp4	AV	Song	Calm	Normal	Kids	R2	A2	2	9	1	0
01-02-02-01-01-02-03.mp4	AV	Song	Calm	Normal	Kids	R2	A3	2	2	1	1
01-02-02-01-01-02-04.mp4	AV	Song	Calm	Normal	Kids	R2	A4	1	2	1	1
01-02-02-01-01-02-05.mp4	AV	Song	Calm	Normal	Kids	R2	A5	3	3	0	0
01-02-02-01-01-02-06.mp4	AV	Song	Calm	Normal	Kids	R2	A6	2	3	1	0
01-02-02-01-01-02-07.mp4	AV	Song	Calm	Normal	Kids	R2	A7	2	2	1	1
01-02-02-01-01-02-08.mp4	AV	Song	Calm	Normal	Kids	R2	A8	1	1	1	1
01-02-02-01-01-02-09.mp4	AV	Song	Calm	Normal	Kids	R2	A9	2	1	1	1
01-02-02-01-01-02-10.mp4	AV	Song	Calm	Normal	Kids	R2	A10	3	3	0	0
01-02-02-01-01-02-11.mp4	AV	Song	Calm	Normal	Kids	R2	A11	2	2	1	1
01-02-02-01-01-02-12.mp4	AV	Song	Calm	Normal	Kids	R2	A12	3	3	0	0
01-02-02-01-01-02-13.mp4	AV	Song	Calm	Normal	Kids	R2	A13	2	2	1	1
01-02-02-01-01-02-14.mp4	AV	Song	Calm	Normal	Kids	R2	A14	3	1	0	1
01-02-02-01-01-02-15.mp4	AV	Song	Calm	Normal	Kids	R2	A15	2	6	1	0
01-02-02-01-01-02-16.mp4	AV	Song	Calm	Normal	Kids	R2	A16	2	2	1	1
01-02-02-01-01-02-17.mp4	AV	Song	Calm	Normal	Kids	R2	A17	2	2	1	1
01-02-02-01-01-02-19.mp4	AV	Song	Calm	Normal	Kids	R2	A19	9	1	0	1
01-02-02-01-01-02-20.mp4	AV	Song	Calm	Normal	Kids	R2	A20	3	2	0	1
01-02-02-01-01-02-21.mp4	AV	Song	Calm	Normal	Kids	R2	A21	3	3	0	0
01-02-02-01-01-02-22.mp4	AV	Song	Calm	Normal	Kids	R2	A22	2	3	1	0
01-02-02-01-01-02-23.mp4	AV	Song	Calm	Normal	Kids	R2	A23	2	2	1	1
01-02-02-01-01-02-24.mp4	AV	Song	Calm	Normal	Kids	R2	A24	3	3	0	0
01-02-02-01-02-01-01.mp4	AV	Song	Calm	Normal	Dogs	R1	A1	2	2	1	1
01-02-02-01-02-01-02.mp4	AV	Song	Calm	Normal	Dogs	R1	A2	2	3	1	0
01-02-02-01-02-01-03.mp4	AV	Song	Calm	Normal	Dogs	R1	A3	4	4	0	0
01-02-02-01-02-01-04.mp4	AV	Song	Calm	Normal	Dogs	R1	A4	2	1	1	1
01-02-02-01-02-01-05.mp4	AV	Song	Calm	Normal	Dogs	R1	A5	3	3	0	0
01-02-02-01-02-01-06.mp4	AV	Song	Calm	Normal	Dogs	R1	A6	4	4	0	0
01-02-02-01-02-01-07.mp4	AV	Song	Calm	Normal	Dogs	R1	A7	2	2	1	1
01-02-02-01-02-01-08.mp4	AV	Song	Calm	Normal	Dogs	R1	A8	3	2	0	1
01-02-02-01-02-01-09.mp4	AV	Song	Calm	Normal	Dogs	R1	A9	4	1	0	1
01-02-02-01-02-01-10.mp4	AV	Song	Calm	Normal	Dogs	R1	A10	3	3	0	0
01-02-02-01-02-01-11.mp4	AV	Song	Calm	Normal	Dogs	R1	A11	2	3	1	0
01-02-02-01-02-01-12.mp4	AV	Song	Calm	Normal	Dogs	R1	A12	1	1	1	1
01-02-02-01-02-01-13.mp4	AV	Song	Calm	Normal	Dogs	R1	A13	2	2	1	1
01-02-02-01-02-01-14.mp4	AV	Song	Calm	Normal	Dogs	R1	A14	3	3	0	0
01-02-02-01-02-01-15.mp4	AV	Song	Calm	Normal	Dogs	R1	A15	3	2	0	1
01-02-02-01-02-01-16.mp4	AV	Song	Calm	Normal	Dogs	R1	A16	3	3	0	0
01-02-02-01-02-01-17.mp4	AV	Song	Calm	Normal	Dogs	R1	A17	2	9	1	0
01-02-02-01-02-01-19.mp4	AV	Song	Calm	Normal	Dogs	R1	A19	1	2	1	1
01-02-02-01-02-01-20.mp4	AV	Song	Calm	Normal	Dogs	R1	A20	3	3	0	0
01-02-02-01-02-01-21.mp4	AV	Song	Calm	Normal	Dogs	R1	A21	1	1	1	1
01-02-02-01-02-01-22.mp4	AV	Song	Calm	Normal	Dogs	R1	A22	2	2	1	1
01-02-02-01-02-01-23.mp4	AV	Song	Calm	Normal	Dogs	R1	A23	3	1	0	1
01-02-02-01-02-01-24.mp4	AV	Song	Calm	Normal	Dogs	R1	A24	2	2	1	1
01-02-02-01-02-02-01.mp4	AV	Song	Calm	Normal	Dogs	R2	A1	2	2	1	1
01-02-02-01-02-02-02.mp4	AV	Song	Calm	Normal	Dogs	R2	A2	2	2	1	1
01-02-02-01-02-02-03.mp4	AV	Song	Calm	Normal	Dogs	R2	A3	4	4	0	0
01-02-02-01-02-02-04.mp4	AV	Song	Calm	Normal	Dogs	R2	A4	3	3	0	0
01-02-02-01-02-02-05.mp4	AV	Song	Calm	Normal	Dogs	R2	A5	2	3	1	0
01-02-02-01-02-02-06.mp4	AV	Song	Calm	Normal	Dogs	R2	A6	2	3	1	0
01-02-02-01-02-02-07.mp4	AV	Song	Calm	Normal	Dogs	R2	A7	2	4	1	0
01-02-02-01-02-02-08.mp4	AV	Song	Calm	Normal	Dogs	R2	A8	3	3	0	0
01-02-02-01-02-02-09.mp4	AV	Song	Calm	Normal	Dogs	R2	A9	2	4	1	0
01-02-02-01-02-02-10.mp4	AV	Song	Calm	Normal	Dogs	R2	A10	3	3	0	0
01-02-02-01-02-02-11.mp4	AV	Song	Calm	Normal	Dogs	R2	A11	1	3	1	0
01-02-02-01-02-02-12.mp4	AV	Song	Calm	Normal	Dogs	R2	A12	3	3	0	0
01-02-02-01-02-02-13.mp4	AV	Song	Calm	Normal	Dogs	R2	A13	2	2	1	1
01-02-02-01-02-02-14.mp4	AV	Song	Calm	Normal	Dogs	R2	A14	3	3	0	0
01-02-02-01-02-02-15.mp4	AV	Song	Calm	Normal	Dogs	R2	A15	2	1	1	1
01-02-02-01-02-02-16.mp4	AV	Song	Calm	Normal	Dogs	R2	A16	3	3	0	0
01-02-02-01-02-02-17.mp4	AV	Song	Calm	Normal	Dogs	R2	A17	1	1	1	1
01-02-02-01-02-02-19.mp4	AV	Song	Calm	Normal	Dogs	R2	A19	3	2	0	1
01-02-02-01-02-02-20.mp4	AV	Song	Calm	Normal	Dogs	R2	A20	3	3	0	0
01-02-02-01-02-02-21.mp4	AV	Song	Calm	Normal	Dogs	R2	A21	1	1	1	1
01-02-02-01-02-02-22.mp4	AV	Song	Calm	Normal	Dogs	R2	A22	3	3	0	0
01-02-02-01-02-02-23.mp4	AV	Song	Calm	Normal	Dogs	R2	A23	1	2	1	1
01-02-02-01-02-02-24.mp4	AV	Song	Calm	Normal	Dogs	R2	A24	2	3	1	0
01-02-02-02-01-01-01.mp4	AV	Song	Calm	Strong	Kids	R1	A1	2	2	1	1
01-02-02-02-01-01-02.mp4	AV	Song	Calm	Strong	Kids	R1	A2	2	1	1	1
01-02-02-02-01-01-03.mp4	AV	Song	Calm	Strong	Kids	R1	A3	3	4	0	0
01-02-02-02-01-01-04.mp4	AV	Song	Calm	Strong	Kids	R1	A4	1	3	1	0
01-02-02-02-01-01-05.mp4	AV	Song	Calm	Strong	Kids	R1	A5	2	2	1	1
01-02-02-02-01-01-06.mp4	AV	Song	Calm	Strong	Kids	R1	A6	2	2	1	1
01-02-02-02-01-01-07.mp4	AV	Song	Calm	Strong	Kids	R1	A7	9	9	0	0
01-02-02-02-01-01-08.mp4	AV	Song	Calm	Strong	Kids	R1	A8	2	2	1	1
01-02-02-02-01-01-09.mp4	AV	Song	Calm	Strong	Kids	R1	A9	2	2	1	1
01-02-02-02-01-01-10.mp4	AV	Song	Calm	Strong	Kids	R1	A10	3	3	0	0
01-02-02-02-01-01-11.mp4	AV	Song	Calm	Strong	Kids	R1	A11	3	3	0	0
01-02-02-02-01-01-12.mp4	AV	Song	Calm	Strong	Kids	R1	A12	2	2	1	1
01-02-02-02-01-01-13.mp4	AV	Song	Calm	Strong	Kids	R1	A13	2	1	1	1
01-02-02-02-01-01-14.mp4	AV	Song	Calm	Strong	Kids	R1	A14	9	3	0	0
01-02-02-02-01-01-15.mp4	AV	Song	Calm	Strong	Kids	R1	A15	2	2	1	1
01-02-02-02-01-01-16.mp4	AV	Song	Calm	Strong	Kids	R1	A16	1	3	1	0
01-02-02-02-01-01-17.mp4	AV	Song	Calm	Strong	Kids	R1	A17	4	2	0	1
01-02-02-02-01-01-19.mp4	AV	Song	Calm	Strong	Kids	R1	A19	3	6	0	0
01-02-02-02-01-01-20.mp4	AV	Song	Calm	Strong	Kids	R1	A20	2	2	1	1
01-02-02-02-01-01-21.mp4	AV	Song	Calm	Strong	Kids	R1	A21	1	2	1	1
01-02-02-02-01-01-22.mp4	AV	Song	Calm	Strong	Kids	R1	A22	2	2	1	1
01-02-02-02-01-01-23.mp4	AV	Song	Calm	Strong	Kids	R1	A23	1	2	1	1
01-02-02-02-01-01-24.mp4	AV	Song	Calm	Strong	Kids	R1	A24	3	3	0	0
01-02-02-02-01-02-01.mp4	AV	Song	Calm	Strong	Kids	R2	A1	2	2	1	1
01-02-02-02-01-02-02.mp4	AV	Song	Calm	Strong	Kids	R2	A2	2	2	1	1
01-02-02-02-01-02-03.mp4	AV	Song	Calm	Strong	Kids	R2	A3	4	4	0	0
01-02-02-02-01-02-04.mp4	AV	Song	Calm	Strong	Kids	R2	A4	2	3	1	0
01-02-02-02-01-02-05.mp4	AV	Song	Calm	Strong	Kids	R2	A5	9	1	0	1
01-02-02-02-01-02-06.mp4	AV	Song	Calm	Strong	Kids	R2	A6	1	2	1	1
01-02-02-02-01-02-07.mp4	AV	Song	Calm	Strong	Kids	R2	A7	2	2	1	1
01-02-02-02-01-02-08.mp4	AV	Song	Calm	Strong	Kids	R2	A8	3	3	0	0
01-02-02-02-01-02-09.mp4	AV	Song	Calm	Strong	Kids	R2	A9	2	4	1	0
01-02-02-02-01-02-10.mp4	AV	Song	Calm	Strong	Kids	R2	A10	3	2	0	1
01-02-02-02-01-02-11.mp4	AV	Song	Calm	Strong	Kids	R2	A11	2	2	1	1
01-02-02-02-01-02-12.mp4	AV	Song	Calm	Strong	Kids	R2	A12	2	3	1	0
01-02-02-02-01-02-13.mp4	AV	Song	Calm	Strong	Kids	R2	A13	3	1	0	1
01-02-02-02-01-02-14.mp4	AV	Song	Calm	Strong	Kids	R2	A14	2	2	1	1
01-02-02-02-01-02-15.mp4	AV	Song	Calm	Strong	Kids	R2	A15	2	2	1	1
01-02-02-02-01-02-16.mp4	AV	Song	Calm	Strong	Kids	R2	A16	2	2	1	1
01-02-02-02-01-02-17.mp4	AV	Song	Calm	Strong	Kids	R2	A17	1	2	1	1
01-02-02-02-01-02-19.mp4	AV	Song	Calm	Strong	Kids	R2	A19	2	1	1	1
01-02-02-02-01-02-20.mp4	AV	Song	Calm	Strong	Kids	R2	A20	1	1	1	1
01-02-02-02-01-02-21.mp4	AV	Song	Calm	Strong	Kids	R2	A21	2	2	1	1
01-02-02-02-01-02-22.mp4	AV	Song	Calm	Strong	Kids	R2	A22	1	1	1	1
01-02-02-02-01-02-23.mp4	AV	Song	Calm	Strong	Kids	R2	A23	1	1	1	1
01-02-02-02-01-02-24.mp4	AV	Song	Calm	Strong	Kids	R2	A24	3	3	0	0
01-02-02-02-02-01-01.mp4	AV	Song	Calm	Strong	Dogs	R1	A1	2	3	1	0
01-02-02-02-02-01-02.mp4	AV	Song	Calm	Strong	Dogs	R1	A2	2	2	1	1
01-02-02-02-02-01-03.mp4	AV	Song	Calm	Strong	Dogs	R1	A3	4	9	0	0
01-02-02-02-02-01-04.mp4	AV	Song	Calm	Strong	Dogs	R1	A4	2	3	1	0
01-02-02-02-02-01-05.mp4	AV	Song	Calm	Strong	Dogs	R1	A5	2	2	1	1
01-02-02-02-02-01-06.mp4	AV	Song	Calm	Strong	Dogs	R1	A6	2	2	1	1
01-02-02-02-02-01-07.mp4	AV	Song	Calm	Strong	Dogs	R1	A7	2	2	1	1
01-02-02-02-02-01-08.mp4	AV	Song	Calm	Strong	Dogs	R1	A8	3	3	0	0
01-02-02-02-02-01-09.mp4	AV	Song	Calm	Strong	Dogs	R1	A9	1	1	1	1
01-02-02-02-02-01-10.mp4	AV	Song	Calm	Strong	Dogs	R1	A10	3	2	0	1
01-02-02-02-02-01-11.mp4	AV	Song	Calm	Strong	Dogs	R1	A11	2	2	1	1
01-02-02-02-02-01-12.mp4	AV	Song	Calm	Strong	Dogs	R1	A12	2	1	1	1
01-02-02-02-02-01-13.mp4	AV	Song	Calm	Strong	Dogs	R1	A13	1	1	1	1
01-02-02-02-02-01-14.mp4	AV	Song	Calm	Strong	Dogs	R1	A14	3	3	0	0
01-02-02-02-02-01-15.mp4	AV	Song	Calm	Strong	Dogs	R1	A15	2	2	1	1
01-02-02-02-02-01-16.mp4	AV	Song	Calm	Strong	Dogs	R1	A16	1	2	1	1
01-02-02-02-02-01-17.mp4	AV	Song	Calm	Strong	Dogs	R1	A17	9	1	0	1
01-02-02-02-02-01-19.mp4	AV	Song	Calm	Strong	Dogs	R1	A19	3	2	0	1
01-02-02-02-02-01-20.mp4	AV	Song	Calm	Strong	Dogs	R1	A20	2	2	1	1
01-02-02-02-02-01-21.mp4	AV	Song	Calm	Strong	Dogs	R1	A21	1	1	1	1
01-02-02-02-02-01-22.mp4	AV	Song	Calm	Strong	Dogs	R1	A22	2	2	1	1
01-02-02-02-02-01-23.mp4	AV	Song	Calm	Strong	Dogs	R1	A23	1	2	1	1
01-02-02-02-02-01-24.mp4	AV	Song	Calm	Strong	Dogs	R1	A24	1	2	1	1
01-02-02-02-02-02-01.mp4	AV	Song	Calm	Strong	Dogs	R2	A1	9	9	0	0
01-02-02-02-02-02-02.mp4	AV	Song	Calm	Strong	Dogs	R2	A2	2	2	1	1
01-02-02-02-02-02-03.mp4	AV	Song	Calm	Strong	Dogs	R2	A3	4	4	0	0
01-02-02-02-02-02-04.mp4	AV	Song	Calm	Strong	Dogs	R2	A4	1	1	1	1
01-02-02-02-02-02-05.mp4	AV	Song	Calm	Strong	Dogs	R2	A5	2	2	1	1
01-02-02-02-02-02-06.mp4	AV	Song	Calm	Strong	Dogs	R2	A6	4	4	0	0
01-02-02-02-02-02-07.mp4	AV	Song	Calm	Strong	Dogs	R2	A7	3	2	0	1
01-02-02-02-02-02-08.mp4	AV	Song	Calm	Strong	Dogs	R2	A8	2	2	1	1
01-02-02-02-02-02-09.mp4	AV	Song	Calm	Strong	Dogs	R2	A9	4	4	0	0
01-02-02-02-02-02-10.mp4	AV	Song	Calm	Strong	Dogs	R2	A10	3	3	0	0
01-02-02-02-02-02-11.mp4	AV	Song	Calm	Strong	Dogs	R2	A11	2	2	1	1
01-02-02-02-02-02-12.mp4	AV	Song	Calm	Strong	Dogs	R2	A12	3	3	0	0
01-02-02-02-02-02-13.mp4	AV	Song	Calm	Strong	Dogs	R2	A13	2	4	1	0
01-02-02-02-02-02-14.mp4	AV	Song	Calm	Strong	Dogs	R2	A14	1	1	1	1
01-02-02-02-02-02-15.mp4	AV	Song	Calm	Strong	Dogs	R2	A15	2	2	1	1
01-02-02-02-02-02-16.mp4	AV	Song	Calm	Strong	Dogs	R2	A16	3	3	0	0
01-02-02-02-02-02-17.mp4	AV	Song	Calm	Strong	Dogs	R2	A17	2	2	1	1
01-02-02-02-02-02-19.mp4	AV	Song	Calm	Strong	Dogs	R2	A19	3	3	0	0
01-02-02-02-02-02-20.mp4	AV	Song	Calm	Strong	Dogs	R2	A20	2	2	1	1
01-02-02-02-02-02-21.mp4	AV	Song	Calm	Strong	Dogs	R2	A21	2	1	1	1
01-02-02-02-02-02-22.mp4	AV	Song	Calm	Strong	Dogs	R2	A22	1	2	1	1
01-02-02-02-02-02-23.mp4	AV	Song	Calm	Strong	Dogs	R2	A23	1	1	1	1
01-02-02-02-02-02-24.mp4	AV	Song	Calm	Strong	Dogs	R2	A24	2	2	1	1
01-02-03-01-01-01-01.mp4	AV	Song	Happy	Normal	Kids	R1	A1	3	3	1	1
01-02-03-01-01-01-02.mp4	AV	Song	Happy	Normal	Kids	R1	A2	3	3	1	1
01-02-03-01-01-01-03.mp4	AV	Song	Happy	Normal	Kids	R1	A3	9	3	0	1
01-02-03-01-01-01-04.mp4	AV	Song	Happy	Normal	Kids	R1	A4	3	3	1	1
01-02-03-01-01-01-05.mp4	AV	Song	Happy	Normal	Kids	R1	A5	3	3	1	1
01-02-03-01-01-01-06.mp4	AV	Song	Happy	Normal	Kids	R1	A6	3	3	1	1
01-02-03-01-01-01-07.mp4	AV	Song	Happy	Normal	Kids	R1	A7	3	3	1	1
01-02-03-01-01-01-08.mp4	AV	Song	Happy	Normal	Kids	R1	A8	3	3	1	1
01-02-03-01-01-01-09.mp4	AV	Song	Happy	Normal	Kids	R1	A9	3	1	1	0
01-02-03-01-01-01-10.mp4	AV	Song	Happy	Normal	Kids	R1	A10	3	3	1	1
01-02-03-01-01-01-11.mp4	AV	Song	Happy	Normal	Kids	R1	A11	1	1	0	0
01-02-03-01-01-01-12.mp4	AV	Song	Happy	Normal	Kids	R1	A12	3	3	1	1
01-02-03-01-01-01-13.mp4	AV	Song	Happy	Normal	Kids	R1	A13	3	3	1	1
01-02-03-01-01-01-14.mp4	AV	Song	Happy	Normal	Kids	R1	A14	3	3	1	1
01-02-03-01-01-01-15.mp4	AV	Song	Happy	Normal	Kids	R1	A15	3	3	1	1
01-02-03-01-01-01-16.mp4	AV	Song	Happy	Normal	Kids	R1	A16	3	3	1	1
01-02-03-01-01-01-17.mp4	AV	Song	Happy	Normal	Kids	R1	A17	1	2	0	0
01-02-03-01-01-01-19.mp4	AV	Song	Happy	Normal	Kids	R1	A19	3	3	1	1
01-02-03-01-01-01-20.mp4	AV	Song	Happy	Normal	Kids	R1	A20	3	3	1	1
01-02-03-01-01-01-21.mp4	AV	Song	Happy	Normal	Kids	R1	A21	9	9	0	0
01-02-03-01-01-01-22.mp4	AV	Song	Happy	Normal	Kids	R1	A22	3	3	1	1
01-02-03-01-01-01-23.mp4	AV	Song	Happy	Normal	Kids	R1	A23	3	3	1	1
01-02-03-01-01-01-24.mp4	AV	Song	Happy	Normal	Kids	R1	A24	3	3	1	1
01-02-03-01-01-02-01.mp4	AV	Song	Happy	Normal	Kids	R2	A1	3	3	1	1
01-02-03-01-01-02-02.mp4	AV	Song	Happy	Normal	Kids	R2	A2	3	3	1	1
01-02-03-01-01-02-03.mp4	AV	Song	Happy	Normal	Kids	R2	A3	3	3	1	1
01-02-03-01-01-02-04.mp4	AV	Song	Happy	Normal	Kids	R2	A4	9	3	0	1
01-02-03-01-01-02-05.mp4	AV	Song	Happy	Normal	Kids	R2	A5	3	3	1	1
01-02-03-01-01-02-06.mp4	AV	Song	Happy	Normal	Kids	R2	A6	2	2	0	0
01-02-03-01-01-02-07.mp4	AV	Song	Happy	Normal	Kids	R2	A7	3	3	1	1
01-02-03-01-01-02-08.mp4	AV	Song	Happy	Normal	Kids	R2	A8	3	3	1	1
01-02-03-01-01-02-09.mp4	AV	Song	Happy	Normal	Kids	R2	A9	3	1	1	0
01-02-03-01-01-02-10.mp4	AV	Song	Happy	Normal	Kids	R2	A10	3	3	1	1
01-02-03-01-01-02-11.mp4	AV	Song	Happy	Normal	Kids	R2	A11	2	2	0	0
01-02-03-01-01-02-12.mp4	AV	Song	Happy	Normal	Kids	R2	A12	3	3	1	1
01-02-03-01-01-02-13.mp4	AV	Song	Happy	Normal	Kids	R2	A13	4	3	0	1
01-02-03-01-01-02-14.mp4	AV	Song	Happy	Normal	Kids	R2	A14	3	3	1	1
01-02-03-01-01-02-15.mp4	AV	Song	Happy	Normal	Kids	R2	A15	3	3	1	1
01-02-03-01-01-02-16.mp4	AV	Song	Happy	Normal	Kids	R2	A16	3	3	1	1
01-02-03-01-01-02-17.mp4	AV	Song	Happy	Normal	Kids	R2	A17	3	3	1	1
01-02-03-01-01-02-19.mp4	AV	Song	Happy	Normal	Kids	R2	A19	3	3	1	1
01-02-03-01-01-02-20.mp4	AV	Song	Happy	Normal	Kids	R2	A20	3	3	1	1
01-02-03-01-01-02-21.mp4	AV	Song	Happy	Normal	Kids	R2	A21	2	3	0	1
01-02-03-01-01-02-22.mp4	AV	Song	Happy	Normal	Kids	R2	A22	3	3	1	1
01-02-03-01-01-02-23.mp4	AV	Song	Happy	Normal	Kids	R2	A23	1	1	0	0
01-02-03-01-01-02-24.mp4	AV	Song	Happy	Normal	Kids	R2	A24	3	3	1	1
01-02-03-01-02-01-01.mp4	AV	Song	Happy	Normal	Dogs	R1	A1	3	3	1	1
01-02-03-01-02-01-02.mp4	AV	Song	Happy	Normal	Dogs	R1	A2	3	3	1	1
01-02-03-01-02-01-03.mp4	AV	Song	Happy	Normal	Dogs	R1	A3	4	4	0	0
01-02-03-01-02-01-04.mp4	AV	Song	Happy	Normal	Dogs	R1	A4	3	3	1	1
01-02-03-01-02-01-05.mp4	AV	Song	Happy	Normal	Dogs	R1	A5	3	3	1	1
01-02-03-01-02-01-06.mp4	AV	Song	Happy	Normal	Dogs	R1	A6	3	3	1	1
01-02-03-01-02-01-07.mp4	AV	Song	Happy	Normal	Dogs	R1	A7	3	3	1	1
01-02-03-01-02-01-08.mp4	AV	Song	Happy	Normal	Dogs	R1	A8	3	3	1	1
01-02-03-01-02-01-09.mp4	AV	Song	Happy	Normal	Dogs	R1	A9	4	3	0	1
01-02-03-01-02-01-10.mp4	AV	Song	Happy	Normal	Dogs	R1	A10	3	3	1	1
01-02-03-01-02-01-11.mp4	AV	Song	Happy	Normal	Dogs	R1	A11	3	3	1	1
01-02-03-01-02-01-12.mp4	AV	Song	Happy	Normal	Dogs	R1	A12	3	3	1	1
01-02-03-01-02-01-13.mp4	AV	Song	Happy	Normal	Dogs	R1	A13	2	2	0	0
01-02-03-01-02-01-14.mp4	AV	Song	Happy	Normal	Dogs	R1	A14	3	3	1	1
01-02-03-01-02-01-15.mp4	AV	Song	Happy	Normal	Dogs	R1	A15	3	3	1	1
01-02-03-01-02-01-16.mp4	AV	Song	Happy	Normal	Dogs	R1	A16	3	3	1	1
01-02-03-01-02-01-17.mp4	AV	Song	Happy	Normal	Dogs	R1	A17	3	3	1	1
01-02-03-01-02-01-19.mp4	AV	Song	Happy	Normal	Dogs	R1	A19	3	3	1	1
01-02-03-01-02-01-20.mp4	AV	Song	Happy	Normal	Dogs	R1	A20	3	3	1	1
01-02-03-01-02-01-21.mp4	AV	Song	Happy	Normal	Dogs	R1	A21	2	3	0	1
01-02-03-01-02-01-22.mp4	AV	Song	Happy	Normal	Dogs	R1	A22	3	3	1	1
01-02-03-01-02-01-23.mp4	AV	Song	Happy	Normal	Dogs	R1	A23	2	3	0	1
01-02-03-01-02-01-24.mp4	AV	Song	Happy	Normal	Dogs	R1	A24	3	9	1	0
01-02-03-01-02-02-01.mp4	AV	Song	Happy	Normal	Dogs	R2	A1	3	3	1	1
01-02-03-01-02-02-02.mp4	AV	Song	Happy	Normal	Dogs	R2	A2	3	3	1	1
01-02-03-01-02-02-03.mp4	AV	Song	Happy	Normal	Dogs	R2	A3	6	6	0	0
01-02-03-01-02-02-04.mp4	AV	Song	Happy	Normal	Dogs	R2	A4	3	3	1	1
01-02-03-01-02-02-05.mp4	AV	Song	Happy	Normal	Dogs	R2	A5	3	3	1	1
01-02-03-01-02-02-06.mp4	AV	Song	Happy	Normal	Dogs	R2	A6	3	3	1	1
01-02-03-01-02-02-07.mp4	AV	Song	Happy	Normal	Dogs	R2	A7	3	2	1	0
01-02-03-01-02-02-08.mp4	AV	Song	Happy	Normal	Dogs	R2	A8	3	3	1	1
01-02-03-01-02-02-09.mp4	AV	Song	Happy	Normal	Dogs	R2	A9	1	1	0	0
01-02-03-01-02-02-10.mp4	AV	Song	Happy	Normal	Dogs	R2	A10	3	3	1	1
01-02-03-01-02-02-11.mp4	AV	Song	Happy	Normal	Dogs	R2	A11	3	3	1	1
01-02-03-01-02-02-12.mp4	AV	Song	Happy	Normal	Dogs	R2	A12	3	3	1	1
01-02-03-01-02-02-13.mp4	AV	Song	Happy	Normal	Dogs	R2	A13	3	3	1	1
01-02-03-01-02-02-14.mp4	AV	Song	Happy	Normal	Dogs	R2	A14	1	3	0	1
01-02-03-01-02-02-15.mp4	AV	Song	Happy	Normal	Dogs	R2	A15	3	3	1	1
01-02-03-01-02-02-16.mp4	AV	Song	Happy	Normal	Dogs	R2	A16	3	3	1	1
01-02-03-01-02-02-17.mp4	AV	Song	Happy	Normal	Dogs	R2	A17	3	3	1	1
01-02-03-01-02-02-19.mp4	AV	Song	Happy	Normal	Dogs	R2	A19	3	1	1	0
01-02-03-01-02-02-20.mp4	AV	Song	Happy	Normal	Dogs	R2	A20	3	3	1	1
01-02-03-01-02-02-21.mp4	AV	Song	Happy	Normal	Dogs	R2	A21	3	3	1	1
01-02-03-01-02-02-22.mp4	AV	Song	Happy	Normal	Dogs	R2	A22	3	3	1	1
01-02-03-01-02-02-23.mp4	AV	Song	Happy	Normal	Dogs	R2	A23	3	3	1	1
01-02-03-01-02-02-24.mp4	AV	Song	Happy	Normal	Dogs	R2	A24	2	3	0	1
01-02-03-02-01-01-01.mp4	AV	Song	Happy	Strong	Kids	R1	A1	3	3	1	1
01-02-03-02-01-01-02.mp4	AV	Song	Happy	Strong	Kids	R1	A2	3	3	1	1
01-02-03-02-01-01-03.mp4	AV	Song	Happy	Strong	Kids	R1	A3	3	3	1	1
01-02-03-02-01-01-04.mp4	AV	Song	Happy	Strong	Kids	R1	A4	3	3	1	1
01-02-03-02-01-01-05.mp4	AV	Song	Happy	Strong	Kids	R1	A5	2	3	0	1
01-02-03-02-01-01-06.mp4	AV	Song	Happy	Strong	Kids	R1	A6	3	3	1	1
01-02-03-02-01-01-07.mp4	AV	Song	Happy	Strong	Kids	R1	A7	3	3	1	1
01-02-03-02-01-01-08.mp4	AV	Song	Happy	Strong	Kids	R1	A8	3	3	1	1
01-02-03-02-01-01-09.mp4	AV	Song	Happy	Strong	Kids	R1	A9	4	4	0	0
01-02-03-02-01-01-10.mp4	AV	Song	Happy	Strong	Kids	R1	A10	3	3	1	1
01-02-03-02-01-01-11.mp4	AV	Song	Happy	Strong	Kids	R1	A11	3	3	1	1
01-02-03-02-01-01-12.mp4	AV	Song	Happy	Strong	Kids	R1	A12	3	3	1	1
01-02-03-02-01-01-13.mp4	AV	Song	Happy	Strong	Kids	R1	A13	3	3	1	1
01-02-03-02-01-01-14.mp4	AV	Song	Happy	Strong	Kids	R1	A14	5	6	0	0
01-02-03-02-01-01-15.mp4	AV	Song	Happy	Strong	Kids	R1	A15	3	3	1	1
01-02-03-02-01-01-16.mp4	AV	Song	Happy	Strong	Kids	R1	A16	3	3	1	1
01-02-03-02-01-01-17.mp4	AV	Song	Happy	Strong	Kids	R1	A17	3	3	1	1
01-02-03-02-01-01-19.mp4	AV	Song	Happy	Strong	Kids	R1	A19	3	3	1	1
01-02-03-02-01-01-20.mp4	AV	Song	Happy	Strong	Kids	R1	A20	3	3	1	1
01-02-03-02-01-01-21.mp4	AV	Song	Happy	Strong	Kids	R1	A21	3	3	1	1
01-02-03-02-01-01-22.mp4	AV	Song	Happy	Strong	Kids	R1	A22	3	3	1	1
01-02-03-02-01-01-23.mp4	AV	Song	Happy	Strong	Kids	R1	A23	3	3	1	1
01-02-03-02-01-01-24.mp4	AV	Song	Happy	Strong	Kids	R1	A24	3	3	1	1
01-02-03-02-01-02-01.mp4	AV	Song	Happy	Strong	Kids	R2	A1	3	3	1	1
01-02-03-02-01-02-02.mp4	AV	Song	Happy	Strong	Kids	R2	A2	3	3	1	1
01-02-03-02-01-02-03.mp4	AV	Song	Happy	Strong	Kids	R2	A3	3	3	1	1
01-02-03-02-01-02-04.mp4	AV	Song	Happy	Strong	Kids	R2	A4	2	9	0	0
01-02-03-02-01-02-05.mp4	AV	Song	Happy	Strong	Kids	R2	A5	3	3	1	1
01-02-03-02-01-02-06.mp4	AV	Song	Happy	Strong	Kids	R2	A6	3	9	1	0
01-02-03-02-01-02-07.mp4	AV	Song	Happy	Strong	Kids	R2	A7	3	3	1	1
01-02-03-02-01-02-08.mp4	AV	Song	Happy	Strong	Kids	R2	A8	4	3	0	1
01-02-03-02-01-02-09.mp4	AV	Song	Happy	Strong	Kids	R2	A9	2	3	0	1
01-02-03-02-01-02-10.mp4	AV	Song	Happy	Strong	Kids	R2	A10	3	3	1	1
01-02-03-02-01-02-11.mp4	AV	Song	Happy	Strong	Kids	R2	A11	3	3	1	1
01-02-03-02-01-02-12.mp4	AV	Song	Happy	Strong	Kids	R2	A12	3	3	1	1
01-02-03-02-01-02-13.mp4	AV	Song	Happy	Strong	Kids	R2	A13	3	3	1	1
01-02-03-02-01-02-14.mp4	AV	Song	Happy	Strong	Kids	R2	A14	3	3	1	1
01-02-03-02-01-02-15.mp4	AV	Song	Happy	Strong	Kids	R2	A15	3	3	1	1
01-02-03-02-01-02-16.mp4	AV	Song	Happy	Strong	Kids	R2	A16	3	3	1	1
01-02-03-02-01-02-17.mp4	AV	Song	Happy	Strong	Kids	R2	A17	3	3	1	1
01-02-03-02-01-02-19.mp4	AV	Song	Happy	Strong	Kids	R2	A19	3	3	1	1
01-02-03-02-01-02-20.mp4	AV	Song	Happy	Strong	Kids	R2	A20	3	3	1	1
01-02-03-02-01-02-21.mp4	AV	Song	Happy	Strong	Kids	R2	A21	2	2	0	0
01-02-03-02-01-02-22.mp4	AV	Song	Happy	Strong	Kids	R2	A22	3	4	1	0
01-02-03-02-01-02-23.mp4	AV	Song	Happy	Strong	Kids	R2	A23	3	4	1	0
01-02-03-02-01-02-24.mp4	AV	Song	Happy	Strong	Kids	R2	A24	2	2	0	0
01-02-03-02-02-01-01.mp4	AV	Song	Happy	Strong	Dogs	R1	A1	3	3	1	1
01-02-03-02-02-01-02.mp4	AV	Song	Happy	Strong	Dogs	R1	A2	3	3	1	1
01-02-03-02-02-01-03.mp4	AV	Song	Happy	Strong	Dogs	R1	A3	3	4	1	0
01-02-03-02-02-01-04.mp4	AV	Song	Happy	Strong	Dogs	R1	A4	3	3	1	1
01-02-03-02-02-01-05.mp4	AV	Song	Happy	Strong	Dogs	R1	A5	3	3	1	1
01-02-03-02-02-01-06.mp4	AV	Song	Happy	Strong	Dogs	R1	A6	3	3	1	1
01-02-03-02-02-01-07.mp4	AV	Song	Happy	Strong	Dogs	R1	A7	3	3	1	1
01-02-03-02-02-01-08.mp4	AV	Song	Happy	Strong	Dogs	R1	A8	3	3	1	1
01-02-03-02-02-01-09.mp4	AV	Song	Happy	Strong	Dogs	R1	A9	3	3	1	1
01-02-03-02-02-01-10.mp4	AV	Song	Happy	Strong	Dogs	R1	A10	3	3	1	1
01-02-03-02-02-01-11.mp4	AV	Song	Happy	Strong	Dogs	R1	A11	3	3	1	1
01-02-03-02-02-01-12.mp4	AV	Song	Happy	Strong	Dogs	R1	A12	3	3	1	1
01-02-03-02-02-01-13.mp4	AV	Song	Happy	Strong	Dogs	R1	A13	3	3	1	1
01-02-03-02-02-01-14.mp4	AV	Song	Happy	Strong	Dogs	R1	A14	3	3	1	1
01-02-03-02-02-01-15.mp4	AV	Song	Happy	Strong	Dogs	R1	A15	3	3	1	1
01-02-03-02-02-01-16.mp4	AV	Song	Happy	Strong	Dogs	R1	A16	3	3	1	1
01-02-03-02-02-01-17.mp4	AV	Song	Happy	Strong	Dogs	R1	A17	3	3	1	1
01-02-03-02-02-01-19.mp4	AV	Song	Happy	Strong	Dogs	R1	A19	3	3	1	1
01-02-03-02-02-01-20.mp4	AV	Song	Happy	Strong	Dogs	R1	A20	3	3	1	1
01-02-03-02-02-01-21.mp4	AV	Song	Happy	Strong	Dogs	R1	A21	3	3	1	1
01-02-03-02-02-01-22.mp4	AV	Song	Happy	Strong	Dogs	R1	A22	3	3	1	1
01-02-03-02-02-01-23.mp4	AV	Song	Happy	Strong	Dogs	R1	A23	9	9	0	0
01-02-03-02-02-01-24.mp4	AV	Song	Happy	Strong	Dogs	R1	A24	3	3	1	1
01-02-03-02-02-02-01.mp4	AV	Song	Happy	Strong	Dogs	R2	A1	3	3	1	1
01-02-03-02-02-02-02.mp4	AV	Song	Happy	Strong	Dogs	R2	A2	3	3	1	1
01-02-03-02-02-02-03.mp4	AV	Song	Happy	Strong	Dogs	R2	A3	4	3	0	1
01-02-03-02-02-02-04.mp4	AV	Song	Happy	Strong	Dogs	R2	A4	3	3	1	1
01-02-03-02-02-02-05.mp4	AV	Song	Happy	Strong	Dogs	R2	A5	3	3	1	1
01-02-03-02-02-02-06.mp4	AV	Song	Happy	Strong	Dogs	R2	A6	3	3	1	1
01-02-03-02-02-02-07.mp4	AV	Song	Happy	Strong	Dogs	R2	A7	3	4	1	0
01-02-03-02-02-02-08.mp4	AV	Song	Happy	Strong	Dogs	R2	A8	3	3	1	1
01-02-03-02-02-02-09.mp4	AV	Song	Happy	Strong	Dogs	R2	A9	3	3	1	1
01-02-03-02-02-02-10.mp4	AV	Song	Happy	Strong	Dogs	R2	A10	3	3	1	1
01-02-03-02-02-02-11.mp4	AV	Song	Happy	Strong	Dogs	R2	A11	3	3	1	1
01-02-03-02-02-02-12.mp4	AV	Song	Happy	Strong	Dogs	R2	A12	3	2	1	0
01-02-03-02-02-02-13.mp4	AV	Song	Happy	Strong	Dogs	R2	A13	3	3	1	1
01-02-03-02-02-02-14.mp4	AV	Song	Happy	Strong	Dogs	R2	A14	3	3	1	1
01-02-03-02-02-02-15.mp4	AV	Song	Happy	Strong	Dogs	R2	A15	3	3	1	1
01-02-03-02-02-02-16.mp4	AV	Song	Happy	Strong	Dogs	R2	A16	3	3	1	1
01-02-03-02-02-02-17.mp4	AV	Song	Happy	Strong	Dogs	R2	A17	1	3	0	1
01-02-03-02-02-02-19.mp4	AV	Song	Happy	Strong	Dogs	R2	A19	3	3	1	1
01-02-03-02-02-02-20.mp4	AV	Song	Happy	Strong	Dogs	R2	A20	3	3	1	1
01-02-03-02-02-02-21.mp4	AV	Song	Happy	Strong	Dogs	R2	A21	3	1	1	0
01-02-03-02-02-02-22.mp4	AV	Song	Happy	Strong	Dogs	R2	A22	3	3	1	1
01-02-03-02-02-02-23.mp4	AV	Song	Happy	Strong	Dogs	R2	A23	3	3	1	1
01-02-03-02-02-02-24.mp4	AV	Song	Happy	Strong	Dogs	R2	A24	3	3	1	1
01-02-04-01-01-01-01.mp4	AV	Song	Sad	Normal	Kids	R1	A1	4	1	1	0
01-02-04-01-01-01-02.mp4	AV	Song	Sad	Normal	Kids	R1	A2	4	4	1	1
01-02-04-01-01-01-03.mp4	AV	Song	Sad	Normal	Kids	R1	A3	4	4	1	1
01-02-04-01-01-01-04.mp4	AV	Song	Sad	Normal	Kids	R1	A4	4	4	1	1
01-02-04-01-01-01-05.mp4	AV	Song	Sad	Normal	Kids	R1	A5	4	4	1	1
01-02-04-01-01-01-06.mp4	AV	Song	Sad	Normal	Kids	R1	A6	4	4	1	1
01-02-04-01-01-01-07.mp4	AV	Song	Sad	Normal	Kids	R1	A7	5	4	0	1
01-02-04-01-01-01-08.mp4	AV	Song	Sad	Normal	Kids	R1	A8	1	4	0	1
01-02-04-01-01-01-09.mp4	AV	Song	Sad	Normal	Kids	R1	A9	4	4	1	1
01-02-04-01-01-01-10.mp4	AV	Song	Sad	Normal	Kids	R1	A10	4	4	1	1
01-02-04-01-01-01-11.mp4	AV	Song	Sad	Normal	Kids	R1	A11	1	4	0	1
01-02-04-01-01-01-12.mp4	AV	Song	Sad	Normal	Kids	R1	A12	6	6	0	0
01-02-04-01-01-01-13.mp4	AV	Song	Sad	Normal	Kids	R1	A13	1	1	0	0
01-02-04-01-01-01-14.mp4	AV	Song	Sad	Normal	Kids	R1	A14	4	4	1	1
01-02-04-01-01-01-15.mp4	AV	Song	Sad	Normal	Kids	R1	A15	4	1	1	0
01-02-04-01-01-01-16.mp4	AV	Song	Sad	Normal	Kids	R1	A16	4	4	1	1
01-02-04-01-01-01-17.mp4	AV	Song	Sad	Normal	Kids	R1	A17	4	4	1	1
01-02-04-01-01-01-19.mp4	AV	Song	Sad	Normal	Kids	R1	A19	1	4	0	1
01-02-04-01-01-01-20.mp4	AV	Song	Sad	Normal	Kids	R1	A20	4	4	1	1
01-02-04-01-01-01-21.mp4	AV	Song	Sad	Normal	Kids	R1	A21	4	4	1	1
01-02-04-01-01-01-22.mp4	AV	Song	Sad	Normal	Kids	R1	A22	4	4	1	1
01-02-04-01-01-01-23.mp4	AV	Song	Sad	Normal	Kids	R1	A23	1	1	0	0
01-02-04-01-01-01-24.mp4	AV	Song	Sad	Normal	Kids	R1	A24	4	4	1	1
01-02-04-01-01-02-01.mp4	AV	Song	Sad	Normal	Kids	R2	A1	4	2	1	0
01-02-04-01-01-02-02.mp4	AV	Song	Sad	Normal	Kids	R2	A2	1	4	0	1
01-02-04-01-01-02-03.mp4	AV	Song	Sad	Normal	Kids	R2	A3	4	4	1	1
01-02-04-01-01-02-04.mp4	AV	Song	Sad	Normal	Kids	R2	A4	4	4	1	1
01-02-04-01-01-02-05.mp4	AV	Song	Sad	Normal	Kids	R2	A5	4	4	1	1
01-02-04-01-01-02-06.mp4	AV	Song	Sad	Normal	Kids	R2	A6	4	4	1	1
01-02-04-01-01-02-07.mp4	AV	Song	Sad	Normal	Kids	R2	A7	4	4	1	1
01-02-04-01-01-02-08.mp4	AV	Song	Sad	Normal	Kids	R2	A8	4	4	1	1
01-02-04-01-01-02-09.mp4	AV	Song	Sad	Normal	Kids	R2	A9	4	4	1	1
01-02-04-01-01-02-10.mp4	AV	Song	Sad	Normal	Kids	R2	A10	4	4	1	1
01-02-04-01-01-02-11.mp4	AV	Song	Sad	Normal	Kids	R2	A11	1	1	0	0
01-02-04-01-01-02-12.mp4	AV	Song	Sad	Normal	Kids	R2	A12	4	4	1	1
01-02-04-01-01-02-13.mp4	AV	Song	Sad	Normal	Kids	R2	A13	2	1	0	0
01-02-04-01-01-02-14.mp4	AV	Song	Sad	Normal	Kids	R2	A14	4	4	1	1
01-02-04-01-01-02-15.mp4	AV	Song	Sad	Normal	Kids	R2	A15	4	4	1	1
01-02-04-01-01-02-16.mp4	AV	Song	Sad	Normal	Kids	R2	A16	2	3	0	0
01-02-04-01-01-02-17.mp4	AV	Song	Sad	Normal	Kids	R2	A17	4	4	1	1
01-02-04-01-01-02-19.mp4	AV	Song	Sad	Normal	Kids	R2	A19	4	4	1	1
01-02-04-01-01-02-20.mp4	AV	Song	Sad	Normal	Kids	R2	A20	4	4	1	1
01-02-04-01-01-02-21.mp4	AV	Song	Sad	Normal	Kids	R2	A21	4	4	1	1
01-02-04-01-01-02-22.mp4	AV	Song	Sad	Normal	Kids	R2	A22	4	4	1	1
01-02-04-01-01-02-23.mp4	AV	Song	Sad	Normal	Kids	R2	A23	1	2	0	0
01-02-04-01-01-02-24.mp4	AV	Song	Sad	Normal	Kids	R2	A24	6	4	0	1
01-02-04-01-02-01-01.mp4	AV	Song	Sad	Normal	Dogs	R1	A1	4	4	1	1
01-02-04-01-02-01-02.mp4	AV	Song	Sad	Normal	Dogs	R1	A2	4	1	1	0
01-02-04-01-02-01-03.mp4	AV	Song	Sad	Normal	Dogs	R1	A3	4	4	1	1
01-02-04-01-02-01-04.mp4	AV	Song	Sad	Normal	Dogs	R1	A4	4	4	1	1
01-02-04-01-02-01-05.mp4	AV	Song	Sad	Normal	Dogs	R1	A5	4	4	1	1
01-02-04-01-02-01-06.mp4	AV	Song	Sad	Normal	Dogs	R1	A6	1	4	0	1
01-02-04-01-02-01-07.mp4	AV	Song	Sad	Normal	Dogs	R1	A7	4	4	1	1
01-02-04-01-02-01-08.mp4	AV	Song	Sad	Normal	Dogs	R1	A8	4	4	1	1
01-02-04-01-02-01-09.mp4	AV	Song	Sad	Normal	Dogs	R1	A9	4	4	1	1
01-02-04-01-02-01-10.mp4	AV	Song	Sad	Normal	Dogs	R1	A10	4	4	1	1
01-02-04-01-02-01-11.mp4	AV	Song	Sad	Normal	Dogs	R1	A11	4	1	1	0
01-02-04-01-02-01-12.mp4	AV	Song	Sad	Normal	Dogs	R1	A12	6	6	0	0
01-02-04-01-02-01-13.mp4	AV	Song	Sad	Normal	Dogs	R1	A13	4	1	1	0
01-02-04-01-02-01-14.mp4	AV	Song	Sad	Normal	Dogs	R1	A14	4	4	1	1
01-02-04-01-02-01-15.mp4	AV	Song	Sad	Normal	Dogs	R1	A15	4	4	1	1
01-02-04-01-02-01-16.mp4	AV	Song	Sad	Normal	Dogs	R1	A16	4	1	1	0
01-02-04-01-02-01-17.mp4	AV	Song	Sad	Normal	Dogs	R1	A17	4	4	1	1
01-02-04-01-02-01-19.mp4	AV	Song	Sad	Normal	Dogs	R1	A19	1	1	0	0
01-02-04-01-02-01-20.mp4	AV	Song	Sad	Normal	Dogs	R1	A20	4	4	1	1
01-02-04-01-02-01-21.mp4	AV	Song	Sad	Normal	Dogs	R1	A21	4	6	1	0
01-02-04-01-02-01-22.mp4	AV	Song	Sad	Normal	Dogs	R1	A22	4	4	1	1
01-02-04-01-02-01-23.mp4	AV	Song	Sad	Normal	Dogs	R1	A23	4	1	1	0
01-02-04-01-02-01-24.mp4	AV	Song	Sad	Normal	Dogs	R1	A24	4	4	1	1
01-02-04-01-02-02-01.mp4	AV	Song	Sad	Normal	Dogs	R2	A1	1	4	0	1
01-02-04-01-02-02-02.mp4	AV	Song	Sad	Normal	Dogs	R2	A2	4	4	1	1
01-02-04-01-02-02-03.mp4	AV	Song	Sad	Normal	Dogs	R2	A3	5	4	0	1
01-02-04-01-02-02-04.mp4	AV	Song	Sad	Normal	Dogs	R2	A4	4	4	1	1
01-02-04-01-02-02-05.mp4	AV	Song	Sad	Normal	Dogs	R2	A5	4	1	1	0
01-02-04-01-02-02-06.mp4	AV	Song	Sad	Normal	Dogs	R2	A6	4	4	1	1
01-02-04-01-02-02-07.mp4	AV	Song	Sad	Normal	Dogs	R2	A7	4	4	1	1
01-02-04-01-02-02-08.mp4	AV	Song	Sad	Normal	Dogs	R2	A8	4	4	1	1
01-02-04-01-02-02-09.mp4	AV	Song	Sad	Normal	Dogs	R2	A9	4	4	1	1
01-02-04-01-02-02-10.mp4	AV	Song	Sad	Normal	Dogs	R2	A10	4	4	1	1
01-02-04-01-02-02-11.mp4	AV	Song	Sad	Normal	Dogs	R2	A11	4	4	1	1
01-02-04-01-02-02-12.mp4	AV	Song	Sad	Normal	Dogs	R2	A12	6	6	0	0
01-02-04-01-02-02-13.mp4	AV	Song	Sad	Normal	Dogs	R2	A13	4	4	1	1
01-02-04-01-02-02-14.mp4	AV	Song	Sad	Normal	Dogs	R2	A14	6	6	0	0
01-02-04-01-02-02-15.mp4	AV	Song	Sad	Normal	Dogs	R2	A15	4	4	1	1
01-02-04-01-02-02-16.mp4	AV	Song	Sad	Normal	Dogs	R2	A16	6	4	0	1
01-02-04-01-02-02-17.mp4	AV	Song	Sad	Normal	Dogs	R2	A17	4	4	1	1
01-02-04-01-02-02-19.mp4	AV	Song	Sad	Normal	Dogs	R2	A19	4	4	1	1
01-02-04-01-02-02-20.mp4	AV	Song	Sad	Normal	Dogs	R2	A20	1	4	0	1
01-02-04-01-02-02-21.mp4	AV	Song	Sad	Normal	Dogs	R2	A21	4	4	1	1
01-02-04-01-02-02-22.mp4	AV	Song	Sad	Normal	Dogs	R2	A22	4	4	1	1
01-02-04-01-02-02-23.mp4	AV	Song	Sad	Normal	Dogs	R2	A23	1	1	0	0
01-02-04-01-02-02-24.mp4	AV	Song	Sad	Normal	Dogs	R2	A24	4	9	1	0
01-02-04-02-01-01-01.mp4	AV	Song	Sad	Strong	Kids	R1	A1	4	4	1	1
01-02-04-02-01-01-02.mp4	AV	Song	Sad	Strong	Kids	R1	A2	4	4	1	1
01-02-04-02-01-01-03.mp4	AV	Song	Sad	Strong	Kids	R1	A3	4	4	1	1
01-02-04-02-01-01-04.mp4	AV	Song	Sad	Strong	Kids	R1	A4	6	6	0	0
01-02-04-02-01-01-05.mp4	AV	Song	Sad	Strong	Kids	R1	A5	4	4	1	1
01-02-04-02-01-01-06.mp4	AV	Song	Sad	Strong	Kids	R1	A6	4	4	1	1
01-02-04-02-01-01-07.mp4	AV	Song	Sad	Strong	Kids	R1	A7	4	4	1	1
01-02-04-02-01-01-08.mp4	AV	Song	Sad	Strong	Kids	R1	A8	4	4	1	1
01-02-04-02-01-01-09.mp4	AV	Song	Sad	Strong	Kids	R1	A9	4	4	1	1
01-02-04-02-01-01-10.mp4	AV	Song	Sad	Strong	Kids	R1	A10	4	4	1	1
01-02-04-02-01-01-11.mp4	AV	Song	Sad	Strong	Kids	R1	A11	4	4	1	1
01-02-04-02-01-01-12.mp4	AV	Song	Sad	Strong	Kids	R1	A12	4	4	1	1
01-02-04-02-01-01-13.mp4	AV	Song	Sad	Strong	Kids	R1	A13	4	1	1	0
01-02-04-02-01-01-14.mp4	AV	Song	Sad	Strong	Kids	R1	A14	6	9	0	0
01-02-04-02-01-01-15.mp4	AV	Song	Sad	Strong	Kids	R1	A15	4	4	1	1
01-02-04-02-01-01-16.mp4	AV	Song	Sad	Strong	Kids	R1	A16	4	4	1	1
01-02-04-02-01-01-17.mp4	AV	Song	Sad	Strong	Kids	R1	A17	4	4	1	1
01-02-04-02-01-01-19.mp4	AV	Song	Sad	Strong	Kids	R1	A19	4	4	1	1
01-02-04-02-01-01-20.mp4	AV	Song	Sad	Strong	Kids	R1	A20	4	4	1	1
01-02-04-02-01-01-21.mp4	AV	Song	Sad	Strong	Kids	R1	A21	4	4	1	1
01-02-04-02-01-01-22.mp4	AV	Song	Sad	Strong	Kids	R1	A22	4	4	1	1
01-02-04-02-01-01-23.mp4	AV	Song	Sad	Strong	Kids	R1	A23	4	4	1	1
01-02-04-02-01-01-24.mp4	AV	Song	Sad	Strong	Kids	R1	A24	4	4	1	1
01-02-04-02-01-02-01.mp4	AV	Song	Sad	Strong	Kids	R2	A1	4	4	1	1
01-02-04-02-01-02-02.mp4	AV	Song	Sad	Strong	Kids	R2	A2	4	4	1	1
01-02-04-02-01-02-03.mp4	AV	Song	Sad	Strong	Kids	R2	A3	4	4	1	1
01-02-04-02-01-02-04.mp4	AV	Song	Sad	Strong	Kids	R2	A4	1	1	0	0
01-02-04-02-01-02-05.mp4	AV	Song	Sad	Strong	Kids	R2	A5	4	4	1	1
01-02-04-02-01-02-06.mp4	AV	Song	Sad	Strong	Kids	R2	A6	4	4	1	1
01-02-04-02-01-02-07.mp4	AV	Song	Sad	Strong	Kids	R2	A7	4	4	1	1
01-02-04-02-01-02-08.mp4	AV	Song	Sad	Strong	Kids	R2	A8	4	4	1	1
01-02-04-02-01-02-09.mp4	AV	Song	Sad	Strong	Kids	R2	A9	4	4	1	1
01-02-04-02-01-02-10.mp4	AV	Song	Sad	Strong	Kids	R2	A10	4	4	1	1
01-02-04-02-01-02-11.mp4	AV	Song	Sad	Strong	Kids	R2	A11	4	4	1	1
01-02-04-02-01-02-12.mp4	AV	Song	Sad	Strong	Kids	R2	A12	4	4	1	1
01-02-04-02-01-02-13.mp4	AV	Song	Sad	Strong	Kids	R2	A13	1	1	0	0
01-02-04-02-01-02-14.mp4	AV	Song	Sad	Strong	Kids	R2	A14	4	4	1	1
01-02-04-02-01-02-15.mp4	AV	Song	Sad	Strong	Kids	R2	A15	6	6	0	0
01-02-04-02-01-02-16.mp4	AV	Song	Sad	Strong	Kids	R2	A16	6	4	0	1
01-02-04-02-01-02-17.mp4	AV	Song	Sad	Strong	Kids	R2	A17	4	9	1	0
01-02-04-02-01-02-19.mp4	AV	Song	Sad	Strong	Kids	R2	A19	4	4	1	1
01-02-04-02-01-02-20.mp4	AV	Song	Sad	Strong	Kids	R2	A20	4	4	1	1
01-02-04-02-01-02-21.mp4	AV	Song	Sad	Strong	Kids	R2	A21	4	4	1	1
01-02-04-02-01-02-22.mp4	AV	Song	Sad	Strong	Kids	R2	A22	6	6	0	0
01-02-04-02-01-02-23.mp4	AV	Song	Sad	Strong	Kids	R2	A23	4	4	1	1
01-02-04-02-01-02-24.mp4	AV	Song	Sad	Strong	Kids	R2	A24	4	4	1	1
01-02-04-02-02-01-01.mp4	AV	Song	Sad	Strong	Dogs	R1	A1	4	4	1	1
01-02-04-02-02-01-02.mp4	AV	Song	Sad	Strong	Dogs	R1	A2	4	4	1	1
01-02-04-02-02-01-03.mp4	AV	Song	Sad	Strong	Dogs	R1	A3	4	4	1	1
01-02-04-02-02-01-04.mp4	AV	Song	Sad	Strong	Dogs	R1	A4	4	4	1	1
01-02-04-02-02-01-05.mp4	AV	Song	Sad	Strong	Dogs	R1	A5	4	4	1	1
01-02-04-02-02-01-06.mp4	AV	Song	Sad	Strong	Dogs	R1	A6	9	9	0	0
01-02-04-02-02-01-07.mp4	AV	Song	Sad	Strong	Dogs	R1	A7	4	4	1	1
01-02-04-02-02-01-08.mp4	AV	Song	Sad	Strong	Dogs	R1	A8	4	4	1	1
01-02-04-02-02-01-09.mp4	AV	Song	Sad	Strong	Dogs	R1	A9	4	4	1	1
01-02-04-02-02-01-10.mp4	AV	Song	Sad	Strong	Dogs	R1	A10	4	4	1	1
01-02-04-02-02-01-11.mp4	AV	Song	Sad	Strong	Dogs	R1	A11	6	6	0	0
01-02-04-02-02-01-12.mp4	AV	Song	Sad	Strong	Dogs	R1	A12	5	5	0	0
01-02-04-02-02-01-13.mp4	AV	Song	Sad	Strong	Dogs	R1	A13	2	2	0	0
01-02-04-02-02-01-14.mp4	AV	Song	Sad	Strong	Dogs	R1	A14	4	4	1	1
01-02-04-02-02-01-15.mp4	AV	Song	Sad	Strong	Dogs	R1	A15	4	4	1	1
01-02-04-02-02-01-16.mp4	AV	Song	Sad	Strong	Dogs	R1	A16	4	4	1	1
01-02-04-02-02-01-17.mp4	AV	Song	Sad	Strong	Dogs	R1	A17	4	4	1	1
01-02-04-02-02-01-19.mp4	AV	Song	Sad	Strong	Dogs	R1	A19	6	4	0	1
01-02-04-02-02-01-20.mp4	AV	Song	Sad	Strong	Dogs	R1	A20	4	4	1	1
01-02-04-02-02-01-21.mp4	AV	Song	Sad	Strong	Dogs	R1	A21	4	4	1	1
01-02-04-02-02-01-22.mp4	AV	Song	Sad	Strong	Dogs	R1	A22	4	9	1	0
01-02-04-02-02-01-23.mp4	AV	Song	Sad	Strong	Dogs	R1	A23	4	4	1	1
01-02-04-02-02-01-24.mp4	AV	Song	Sad	Strong	Dogs	R1	A24	4	4	1	1
01-02-04-02-02-02-01.mp4	AV	Song	Sad	Strong	Dogs	R2	A1	4	4	1	1
01-02-04-02-02-02-02.mp4	AV	Song	Sad	Strong	Dogs	R2	A2	4	4	1	1
01-02-04-02-02-02-03.mp4	AV	Song	Sad	Strong	Dogs	R2	A3	4	4	1	1
01-02-04-02-02-02-04.mp4	AV	Song	Sad	Strong	Dogs	R2	A4	4	4	1	1
01-02-04-02-02-02-05.mp4	AV	Song	Sad	Strong	Dogs	R2	A5	4	4	1	1
01-02-04-02-02-02-06.mp4	AV	Song	Sad	Strong	Dogs	R2	A6	4	4	1	1
01-02-04-02-02-02-07.mp4	AV	Song	Sad	Strong	Dogs	R2	A7	4	4	1	1
01-02-04-02-02-02-08.mp4	AV	Song	Sad	Strong	Dogs	R2	A8	6	6	0	0
01-02-04-02-02-02-09.mp4	AV	Song	Sad	Strong	Dogs	R2	A9	6	4	0	1
01-02-04-02-02-02-10.mp4	AV	Song	Sad	Strong	Dogs	R2	A10	4	4	1	1
01-02-04-02-02-02-11.mp4	AV	Song	Sad	Strong	Dogs	R2	A11	4	4	1	1
01-02-04-02-02-02-12.mp4	AV	Song	Sad	Strong	Dogs	R2	A12	6	6	0	0
01-02-04-02-02-02-13.mp4	AV	Song	Sad	Strong	Dogs	R2	A13	4	6	1	0
01-02-04-02-02-02-14.mp4	AV	Song	Sad	Strong	Dogs	R2	A14	4	4	1	1
01-02-04-02-02-02-15.mp4	AV	Song	Sad	Strong	Dogs	R2	A15	4	4	1	1
01-02-04-02-02-02-16.mp4	AV	Song	Sad	Strong	Dogs	R2	A16	4	4	1	1
01-02-04-02-02-02-17.mp4	AV	Song	Sad	Strong	Dogs	R2	A17	4	4	1	1
01-02-04-02-02-02-19.mp4	AV	Song	Sad	Strong	Dogs	R2	A19	4	4	1	1
01-02-04-02-02-02-20.mp4	AV	Song	Sad	Strong	Dogs	R2	A20	6	4	0	1
01-02-04-02-02-02-21.mp4	AV	Song	Sad	Strong	Dogs	R2	A21	4	4	1	1
01-02-04-02-02-02-22.mp4	AV	Song	Sad	Strong	Dogs	R2	A22	9	9	0	0
01-02-04-02-02-02-23.mp4	AV	Song	Sad	Strong	Dogs	R2	A23	4	1	1	0
01-02-04-02-02-02-24.mp4	AV	Song	Sad	Strong	Dogs	R2	A24	4	4	1	1
01-02-05-01-01-01-01.mp4	AV	Song	Angry	Normal	Kids	R1	A1	5	5	1	1
01-02-05-01-01-01-02.mp4	AV	Song	Angry	Normal	Kids	R1	A2	5	5	1	1
01-02-05-01-01-01-03.mp4	AV	Song	Angry	Normal	Kids	R1	A3	5	5	1	1
01-02-05-01-01-01-04.mp4	AV	Song	Angry	Normal	Kids	R1	A4	9	9	0	0
01-02-05-01-01-01-05.mp4	AV	Song	Angry	Normal	Kids	R1	A5	4	4	0	0
01-02-05-01-01-01-06.mp4	AV	Song	Angry	Normal	Kids	R1	A6	5	5	1	1
01-02-05-01-01-01-07.mp4	AV	Song	Angry	Normal	Kids	R1	A7	5	5	1	1
01-02-05-01-01-01-08.mp4	AV	Song	Angry	Normal	Kids	R1	A8	5	5	1	1
01-02-05-01-01-01-09.mp4	AV	Song	Angry	Normal	Kids	R1	A9	5	5	1	1
01-02-05-01-01-01-10.mp4	AV	Song	Angry	Normal	Kids	R1	A10	5	5	1	1
01-02-05-01-01-01-11.mp4	AV	Song	Angry	Normal	Kids	R1	A11	1	6	0	0
01-02-05-01-01-01-12.mp4	AV	Song	Angry	Normal	Kids	R1	A12	5	5	1	1
01-02-05-01-01-01-13.mp4	AV	Song	Angry	Normal	Kids	R1	A13	5	5	1	1
01-02-05-01-01-01-14.mp4	AV	Song	Angry	Normal	Kids	R1	A14	5	5	1	1
01-02-05-01-01-01-15.mp4	AV	Song	Angry	Normal	Kids	R1	A15	5	3	1	0
01-02-05-01-01-01-16.mp4	AV	Song	Angry	Normal	Kids	R1	A16	5	5	1	1
01-02-05-01-01-01-17.mp4	AV	Song	Angry	Normal	Kids	R1	A17	5	5	1	1
01-02-05-01-01-01-19.mp4	AV	Song	Angry	Normal	Kids	R1	A19	5	5	1	1
01-02-05-01-01-01-20.mp4	AV	Song	Angry	Normal	Kids	R1	A20	5	5	1	1
01-02-05-01-01-01-21.mp4	AV	Song	Angry	Normal	Kids	R1	A21	5	5	1	1
01-02-05-01-01-01-22.mp4	AV	Song	Angry	Normal	Kids	R1	A22	5	5	1	1
01-02-05-01-01-01-23.mp4	AV	Song	Angry	Normal	Kids	R1	A23	5	5	1	1
01-02-05-01-01-01-24.mp4	AV	Song	Angry	Normal	Kids	R1	A24	5	5	1	1
01-02-05-01-01-02-01.mp4	AV	Song	Angry	Normal	Kids	R2	A1	5	5	1	1
01-02-05-01-01-02-02.mp4	AV	Song	Angry	Normal	Kids	R2	A2	5	5	1	1
01-02-05-01-01-02-03.mp4	AV	Song	Angry	Normal	Kids	R2	A3	5	5	1	1
01-02-05-01-01-02-04.mp4	AV	Song	Angry	Normal	Kids	R2	A4	5	5	1	1
01-02-05-01-01-02-05.mp4	AV	Song	Angry	Normal	Kids	R2	A5	5	5	1	1
01-02-05-01-01-02-06.mp4	AV	Song	Angry	Normal	Kids	R2	A6	5	5	1	1
01-02-05-01-01-02-07.mp4	AV	Song	Angry	Normal	Kids	R2	A7	5	5	1	1
01-02-05-01-01-02-08.mp4	AV	Song	Angry	Normal	Kids	R2	A8	5	5	1	1
01-02-05-01-01-02-09.mp4	AV	Song	Angry	Normal	Kids	R2	A9	5	5	1	1
01-02-05-01-01-02-10.mp4	AV	Song	Angry	Normal	Kids	R2	A10	5	5	1	1
01-02-05-01-01-02-11.mp4	AV	Song	Angry	Normal	Kids	R2	A11	1	5	0	1
01-02-05-01-01-02-12.mp4	AV	Song	Angry	Normal	Kids	R2	A12	5	5	1	1
01-02-05-01-01-02-13.mp4	AV	Song	Angry	Normal	Kids	R2	A13	5	5	1	1
01-02-05-01-01-02-14.mp4	AV	Song	Angry	Normal	Kids	R2	A14	5	5	1	1
01-02-05-01-01-02-15.mp4	AV	Song	Angry	Normal	Kids	R2	A15	6	6	0	0
01-02-05-01-01-02-16.mp4	AV	Song	Angry	Normal	Kids	R2	A16	5	5	1	1
01-02-05-01-01-02-17.mp4	AV	Song	Angry	Normal	Kids	R2	A17	6	6	0	0
01-02-05-01-01-02-19.mp4	AV	Song	Angry	Normal	Kids	R2	A19	5	5	1	1
01-02-05-01-01-02-20.mp4	AV	Song	Angry	Normal	Kids	R2	A20	5	5	1	1
01-02-05-01-01-02-21.mp4	AV	Song	Angry	Normal	Kids	R2	A21	5	5	1	1
01-02-05-01-01-02-22.mp4	AV	Song	Angry	Normal	Kids	R2	A22	5	1	1	0
01-02-05-01-01-02-23.mp4	AV	Song	Angry	Normal	Kids	R2	A23	5	5	1	1
01-02-05-01-01-02-24.mp4	AV	Song	Angry	Normal	Kids	R2	A24	5	6	1	0
01-02-05-01-02-01-01.mp4	AV	Song	Angry	Normal	Dogs	R1	A1	5	5	1	1
01-02-05-01-02-01-02.mp4	AV	Song	Angry	Normal	Dogs	R1	A2	5	5	1	1
01-02-05-01-02-01-03.mp4	AV	Song	Angry	Normal	Dogs	R1	A3	5	5	1	1
01-02-05-01-02-01-04.mp4	AV	Song	Angry	Normal	Dogs	R1	A4	5	5	1	1
01-02-05-01-02-01-05.mp4	AV	Song	Angry	Normal	Dogs	R1	A5	5	5	1	1
01-02-05-01-02-01-06.mp4	AV	Song	Angry	Normal	Dogs	R1	A6	5	5	1	1
01-02-05-01-02-01-07.mp4	AV	Song	Angry	Normal	Dogs	R1	A7	5	5	1	1
01-02-05-01-02-01-08.mp4	AV	Song	Angry	Normal	Dogs	R1	A8	5	5	1	1
01-02-05-01-02-01-09.mp4	AV	Song	Angry	Normal	Dogs	R1	A9	5	5	1	1
01-02-05-01-02-01-10.mp4	AV	Song	Angry	Normal	Dogs	R1	A10	5	5	1	1
01-02-05-01-02-01-11.mp4	AV	Song	Angry	Normal	Dogs	R1	A11	9	9	0	0
01-02-05-01-02-01-12.mp4	AV	Song	Angry	Normal	Dogs	R1	A12	5	5	1	1
01-02-05-01-02-01-13.mp4	AV	Song	Angry	Normal	Dogs	R1	A13	5	5	1	1
01-02-05-01-02-01-14.mp4	AV	Song	Angry	Normal	Dogs	R1	A14	5	5	1	1
01-02-05-01-02-01-15.mp4	AV	Song	Angry	Normal	Dogs	R1	A15	5	5	1	1
01-02-05-01-02-01-16.mp4	AV	Song	Angry	Normal	Dogs	R1	A16	9	5	0	1
01-02-05-01-02-01-17.mp4	AV	Song	Angry	Normal	Dogs	R1	A17	5	5	1	1
01-02-05-01-02-01-19.mp4	AV	Song	Angry	Normal	Dogs	R1	A19	5	5	1	1
01-02-05-01-02-01-20.mp4	AV	Song	Angry	Normal	Dogs	R1	A20	5	5	1	1
01-02-05-01-02-01-21.mp4	AV	Song	Angry	Normal	Dogs	R1	A21	5	9	1	0
01-02-05-01-02-01-22.mp4	AV	Song	Angry	Normal	Dogs	R1	A22	1	5	0	1
01-02-05-01-02-01-23.mp4	AV	Song	Angry	Normal	Dogs	R1	A23	5	5	1	1
01-02-05-01-02-01-24.mp4	AV	Song	Angry	Normal	Dogs	R1	A24	4	4	0	0
01-02-05-01-02-02-01.mp4	AV	Song	Angry	Normal	Dogs	R2	A1	5	5	1	1
01-02-05-01-02-02-02.mp4	AV	Song	Angry	Normal	Dogs	R2	A2	5	5	1	1
01-02-05-01-02-02-03.mp4	AV	Song	Angry	Normal	Dogs	R2	A3	5	5	1	1
01-02-05-01-02-02-04.mp4	AV	Song	Angry	Normal	Dogs	R2	A4	5	5	1	1
01-02-05-01-02-02-05.mp4	AV	Song	Angry	Normal	Dogs	R2	A5	1	1	0	0
01-02-05-01-02-02-06.mp4	AV	Song	Angry	Normal	Dogs	R2	A6	5	5	1	1
01-02-05-01-02-02-07.mp4	AV	Song	Angry	Normal	Dogs	R2	A7	5	5	1	1
01-02-05-01-02-02-08.mp4	AV	Song	Angry	Normal	Dogs	R2	A8	5	5	1	1
01-02-05-01-02-02-09.mp4	AV	Song	Angry	Normal	Dogs	R2	A9	5	5	1	1
01-02-05-01-02-02-10.mp4	AV	Song	Angry	Normal	Dogs	R2	A10	5	5	1	1
01-02-05-01-02-02-11.mp4	AV	Song	Angry	Normal	Dogs	R2	A11	5	5	1	1
01-02-05-01-02-02-12.mp4	AV	Song	Angry	Normal	Dogs	R2	A12	5	5	1	1
01-02-05-01-02-02-13.mp4	AV	Song	Angry	Normal	Dogs	R2	A13	1	5	0	1
01-02-05-01-02-02-14.mp4	AV	Song	Angry	Normal	Dogs	R2	A14	5	5	1	1
01-02-05-01-02-02-15.mp4	AV	Song	Angry	Normal	Dogs	R2	A15	5	5	1	1
01-02-05-01-02-02-16.mp4	AV	Song	Angry	Normal	Dogs	R2	A16	5	5	1	1
01-02-05-01-02-02-17.mp4	AV	Song	Angry	Normal	Dogs	R2	A17	5	5	1	1
01-02-05-01-02-02-19.mp4	AV	Song	Angry	Normal	Dogs	R2	A19	6	5	0	1
01-02-05-01-02-02-20.mp4	AV	Song	Angry	Normal	Dogs	R2	A20	5	5	1	1
01-02-05-01-02-02-21.mp4	AV	Song	Angry	Normal	Dogs	R2	A21	2	2	0	0
01-02-05-01-02-02-22.mp4	AV	Song	Angry	Normal	Dogs	R2	A22	1	2	0	0
01-02-05-01-02-02-23.mp4	AV	Song	Angry	Normal	Dogs	R2	A23	5	5	1	1
01-02-05-01-02-02-24.mp4	AV	Song	Angry	Normal	Dogs	R2	A24	6	6	0	0
01-02-05-02-01-01-01.mp4	AV	Song	Angry	Strong	Kids	R1	A1	5	5	1	1
01-02-05-02-01-01-02.mp4	AV	Song	Angry	Strong	Kids	R1	A2	5	5	1	1
01-02-05-02-01-01-03.mp4	AV	Song	Angry	Strong	Kids	R1	A3	5	5	1	1
01-02-05-02-01-01-04.mp4	AV	Song	Angry	Strong	Kids	R1	A4	5	5	1	1
01-02-05-02-01-01-05.mp4	AV	Song	Angry	Strong	Kids	R1	A5	6	5	0	1
01-02-05-02-01-01-06.mp4	AV	Song	Angry	Strong	Kids	R1	A6	4	5	0	1
01-02-05-02-01-01-07.mp4	AV	Song	Angry	Strong	Kids	R1	A7	5	5	1	1
01-02-05-02-01-01-08.mp4	AV	Song	Angry	Strong	Kids	R1	A8	5	5	1	1
01-02-05-02-01-01-09.mp4	AV	Song	Angry	Strong	Kids	R1	A9	5	5	1	1
01-02-05-02-01-01-10.mp4	AV	Song	Angry	Strong	Kids	R1	A10	5	5	1	1
01-02-05-02-01-01-11.mp4	AV	Song	Angry	Strong	Kids	R1	A11	5	5	1	1
01-02-05-02-01-01-12.mp4	AV	Song	Angry	Strong	Kids	R1	A12	5	5	1	1
01-02-05-02-01-01-13.mp4	AV	Song	Angry	Strong	Kids	R1	A13	5	5	1	1
01-02-05-02-01-01-14.mp4	AV	Song	Angry	Strong	Kids	R1	A14	5	5	1	1
01-02-05-02-01-01-15.mp4	AV	Song	Angry	Strong	Kids	R1	A15	5	5	1	1
01-02-05-02-01-01-16.mp4	AV	Song	Angry	Strong	Kids	R1	A16	5	5	1	1
01-02-05-02-01-01-17.mp4	AV	Song	Angry	Strong	Kids	R1	A17	5	5	1	1
01-02-05-02-01-01-19.mp4	AV	Song	Angry	Strong	Kids	R1	A19	5	5	1	1
01-02-05-02-01-01-20.mp4	AV	Song	Angry	Strong	Kids	R1	A20	5	5	1	1
01-02-05-02-01-01-21.mp4	AV	Song	Angry	Strong	Kids	R1	A21	5	1	1	0
01-02-05-02-01-01-22.mp4	AV	Song	Angry	Strong	Kids	R1	A22	5	5	1	1
01-02-05-02-01-01-23.mp4	AV	Song	Angry	Strong	Kids	R1	A23	5	5	1	1
01-02-05-02-01-01-24.mp4	AV	Song	Angry	Strong	Kids	R1	A24	5	5	1	1
01-02-05-02-01-02-01.mp4	AV	Song	Angry	Strong	Kids	R2	A1	5	5	1	1
01-02-05-02-01-02-02.mp4	AV	Song	Angry	Strong	Kids	R2	A2	5	5	1	1
01-02-05-02-01-02-03.mp4	AV	Song	Angry	Strong	Kids	R2	A3	5	5	1	1
01-02-05-02-01-02-04.mp4	AV	Song	Angry	Strong	Kids	R2	A4	5	5	1	1
01-02-05-02-01-02-05.mp4	AV	Song	Angry	Strong	Kids	R2	A5	2	5	0	1
01-02-05-02-01-02-06.mp4	AV	Song	Angry	Strong	Kids	R2	A6	5	5	1	1
01-02-05-02-01-02-07.mp4	AV	Song	Angry	Strong	Kids	R2	A7	5	5	1	1
01-02-05-02-01-02-08.mp4	AV	Song	Angry	Strong	Kids	R2	A8	5	5	1	1
01-02-05-02-01-02-09.mp4	AV	Song	Angry	Strong	Kids	R2	A9	5	5	1	1
01-02-05-02-01-02-10.mp4	AV	Song	Angry	Strong	Kids	R2	A10	5	5	1	1
01-02-05-02-01-02-11.mp4	AV	Song	Angry	Strong	Kids	R2	A11	5	5	1	1
01-02-05-02-01-02-12.mp4	AV	Song	Angry	Strong	Kids	R2	A12	5	6	1	0
01-02-05-02-01-02-13.mp4	AV	Song	Angry	Strong	Kids	R2	A13	5	5	1	1
01-02-05-02-01-02-14.mp4	AV	Song	Angry	Strong	Kids	R2	A14	5	5	1	1
01-02-05-02-01-02-15.mp4	AV	Song	Angry	Strong	Kids	R2	A15	5	5	1	1
01-02-05-02-01-02-16.mp4	AV	Song	Angry	Strong	Kids	R2	A16	5	5	1	1
01-02-05-02-01-02-17.mp4	AV	Song	Angry	Strong	Kids	R2	A17	5	5	1	1
01-02-05-02-01-02-19.mp4	AV	Song	Angry	Strong	Kids	R2	A19	5	5	1	1
01-02-05-02-01-02-20.mp4	AV	Song	Angry	Strong	Kids	R2	A20	5	5	1	1
01-02-05-02-01-02-21.mp4	AV	Song	Angry	Strong	Kids	R2	A21	5	5	1	1
01-02-05-02-01-02-22.mp4	AV	Song	Angry	Strong	Kids	R2	A22	5	5	1	1
01-02-05-02-01-02-23.mp4	AV	Song	Angry	Strong	Kids	R2	A23	5	5	1	1
01-02-05-02-01-02-24.mp4	AV	Song	Angry	Strong	Kids	R2	A24	5	5	1	1
01-02-05-02-02-01-01.mp4	AV	Song	Angry	Strong	Dogs	R1	A1	5	5	1	1
01-02-05-02-02-01-02.mp4	AV	Song	Angry	Strong	Dogs	R1	A2	5	6	1	0
01-02-05-02-02-01-03.mp4	AV	Song	Angry	Strong	Dogs	R1	A3	5	5	1	1
01-02-05-02-02-01-04.mp4	AV	Song	Angry	Strong	Dogs	R1	A4	5	5	1	1
01-02-05-02-02-01-05.mp4	AV	Song	Angry	Strong	Dogs	R1	A5	5	5	1	1
01-02-05-02-02-01-06.mp4	AV	Song	Angry	Strong	Dogs	R1	A6	5	5	1	1
01-02-05-02-02-01-07.mp4	AV	Song	Angry	Strong	Dogs	R1	A7	5	5	1	1
01-02-05-02-02-01-08.mp4	AV	Song	Angry	Strong	Dogs	R1	A8	5	5	1	1
01-02-05-02-02-01-09.mp4	AV	Song	Angry	Strong	Dogs	R1	A9	5	5	1	1
01-02-05-02-02-01-10.mp4	AV	Song	Angry	Strong	Dogs	R1	A10	4	5	0	1
01-02-05-02-02-01-11.mp4	AV	Song	Angry	Strong	Dogs	R1	A11	5	5	1	1
01-02-05-02-02-01-12.mp4	AV	Song	Angry	Strong	Dogs	R1	A12	5	5	1	1
01-02-05-02-02-01-13.mp4	AV	Song	Angry	Strong	Dogs	R1	A13	5	5	1	1
01-02-05-02-02-01-14.mp4	AV	Song	Angry	Strong	Dogs	R1	A14	5	5	1	1
01-02-05-02-02-01-15.mp4	AV	Song	Angry	Strong	Dogs	R1	A15	5	5	1	1
01-02-05-02-02-01-16.mp4	AV	Song	Angry	Strong	Dogs	R1	A16	5	5	1	1
01-02-05-02-02-01-17.mp4	AV	Song	Angry	Strong	Dogs	R1	A17	5	5	1	1
01-02-05-02-02-01-19.mp4	AV	Song	Angry	Strong	Dogs	R1	A19	5	5	1	1
01-02-05-02-02-01-20.mp4	AV	Song	Angry	Strong	Dogs	R1	A20	5	5	1	1
01-02-05-02-02-01-21.mp4	AV	Song	Angry	Strong	Dogs	R1	A21	5	6	1	0
01-02-05-02-02-01-22.mp4	AV	Song	Angry	Strong	Dogs	R1	A22	5	5	1	1
01-02-05-02-02-01-23.mp4	AV	Song	Angry	Strong	Dogs	R1	A23	5	5	1	1
01-02-05-02-02-01-24.mp4	AV	Song	Angry	Strong	Dogs	R1	A24	5	5	1	1
01-02-05-02-02-02-01.mp4	AV	Song	Angry	Strong	Dogs	R2	A1	5	5	1	1
01-02-05-02-02-02-02.mp4	AV	Song	Angry	Strong	Dogs	R2	A2	5	5	1	1
01-02-05-02-02-02-03.mp4	AV	Song	Angry	Strong	Dogs	R2	A3	5	5	1	1
01-02-05-02-02-02-04.mp4	AV	Song	Angry	Strong	Dogs	R2	A4	5	5	1	1
01-02-05-02-02-02-05.mp4	AV	Song	Angry	Strong	Dogs	R2	A5	5	5	1	1
01-02-05-02-02-02-06.mp4	AV	Song	Angry	Strong	Dogs	R2	A6	5	5	1	1
01-02-05-02-02-02-07.mp4	AV	Song	Angry	Strong	Dogs	R2	A7	5	5	1	1
01-02-05-02-02-02-08.mp4	AV	Song	Angry	Strong	Dogs	R2	A8	5	5	1	1
01-02-05-02-02-02-09.mp4	AV	Song	Angry	Strong	Dogs	R2	A9	5	5	1	1
01-02-05-02-02-02-10.mp4	AV	Song	Angry	Strong	Dogs	R2	A10	5	5	1	1
01-02-05-02-02-02-11.mp4	AV	Song	Angry	Strong	Dogs	R2	A11	5	9	1	0
01-02-05-02-02-02-12.mp4	AV	Song	Angry	Strong	Dogs	R2	A12	5	5	1	1
01-02-05-02-02-02-13.mp4	AV	Song	Angry	Strong	Dogs	R2	A13	5	5	1	1
01-02-05-02-02-02-14.mp4	AV	Song	Angry	Strong	Dogs	R2	A14	5	5	1	1
01-02-05-02-02-02-15.mp4	AV	Song	Angry	Strong	Dogs	R2	A15	6	6	0	0
01-02-05-02-02-02-16.mp4	AV	Song	Angry	Strong	Dogs	R2	A16	5	5	1	1
01-02-05-02-02-02-17.mp4	AV	Song	Angry	Strong	Dogs	R2	A17	5	5	1	1
01-02-05-02-02-02-19.mp4	AV	Song	Angry	Strong	Dogs	R2	A19	5	5	1	1
01-02-05-02-02-02-20.mp4	AV	Song	Angry	Strong	Dogs	R2	A20	5	6	1	0
01-02-05-02-02-02-21.mp4	AV	Song	Angry	Strong	Dogs	R2	A21	5	5	1	1
01-02-05-02-02-02-22.mp4	AV	Song	Angry	Strong	Dogs	R2	A22	5	5	1	1
01-02-05-02-02-02-23.mp4	AV	Song	Angry	Strong	Dogs	R2	A23	5	5	1	1
01-02-05-02-02-02-24.mp4	AV	Song	Angry	Strong	Dogs	R2	A24	5	5	1	1
01-02-06-01-01-01-01.mp4	AV	Song	Fearful	Normal	Kids	R1	A1	6	4	1	0
01-02-06-01-01-01-02.mp4	AV	Song	Fearful	Normal	Kids	R1	A2	6	4	1	0
01-02-06-01-01-01-03.mp4	AV	Song	Fearful	Normal	Kids	R1	A3	4	6	0	1
01-02-06-01-01-01-04.mp4	AV	Song	Fearful	Normal	Kids	R1	A4	5	5	0	0
01-02-06-01-01-01-05.mp4	AV	Song	Fearful	Normal	Kids	R1	A5	6	6	1	1
01-02-06-01-01-01-06.mp4	AV	Song	Fearful	Normal	Kids	R1	A6	2	4	0	0
01-02-06-01-01-01-07.mp4	AV	Song	Fearful	Normal	Kids	R1	A7	5	5	0	0
01-02-06-01-01-01-08.mp4	AV	Song	Fearful	Normal	Kids	R1	A8	6	6	1	1
01-02-06-01-01-01-09.mp4	AV	Song	Fearful	Normal	Kids	R1	A9	6	6	1	1
01-02-06-01-01-01-10.mp4	AV	Song	Fearful	Normal	Kids	R1	A10	4	4	0	0
01-02-06-01-01-01-11.mp4	AV	Song	Fearful	Normal	Kids	R1	A11	6	6	1	1
01-02-06-01-01-01-12.mp4	AV	Song	Fearful	Normal	Kids	R1	A12	6	6	1	1
01-02-06-01-01-01-13.mp4	AV	Song	Fearful	Normal	Kids	R1	A13	9	6	0	1
01-02-06-01-01-01-14.mp4	AV	Song	Fearful	Normal	Kids	R1	A14	5	6	0	1
01-02-06-01-01-01-15.mp4	AV	Song	Fearful	Normal	Kids	R1	A15	6	6	1	1
01-02-06-01-01-01-16.mp4	AV	Song	Fearful	Normal	Kids	R1	A16	5	6	0	1
01-02-06-01-01-01-17.mp4	AV	Song	Fearful	Normal	Kids	R1	A17	4	6	0	1
01-02-06-01-01-01-19.mp4	AV	Song	Fearful	Normal	Kids	R1	A19	6	4	1	0
01-02-06-01-01-01-20.mp4	AV	Song	Fearful	Normal	Kids	R1	A20	6	6	1	1
01-02-06-01-01-01-21.mp4	AV	Song	Fearful	Normal	Kids	R1	A21	6	5	1	0
01-02-06-01-01-01-22.mp4	AV	Song	Fearful	Normal	Kids	R1	A22	6	6	1	1
01-02-06-01-01-01-23.mp4	AV	Song	Fearful	Normal	Kids	R1	A23	6	6	1	1
01-02-06-01-01-01-24.mp4	AV	Song	Fearful	Normal	Kids	R1	A24	6	6	1	1
01-02-06-01-01-02-01.mp4	AV	Song	Fearful	Normal	Kids	R2	A1	9	2	0	0
01-02-06-01-01-02-02.mp4	AV	Song	Fearful	Normal	Kids	R2	A2	6	4	1	0
01-02-06-01-01-02-03.mp4	AV	Song	Fearful	Normal	Kids	R2	A3	6	6	1	1
01-02-06-01-01-02-04.mp4	AV	Song	Fearful	Normal	Kids	R2	A4	6	6	1	1
01-02-06-01-01-02-05.mp4	AV	Song	Fearful	Normal	Kids	R2	A5	6	6	1	1
01-02-06-01-01-02-06.mp4	AV	Song	Fearful	Normal	Kids	R2	A6	4	6	0	1
01-02-06-01-01-02-07.mp4	AV	Song	Fearful	Normal	Kids	R2	A7	6	6	1	1
01-02-06-01-01-02-08.mp4	AV	Song	Fearful	Normal	Kids	R2	A8	6	6	1	1
01-02-06-01-01-02-09.mp4	AV	Song	Fearful	Normal	Kids	R2	A9	6	4	1	0
01-02-06-01-01-02-10.mp4	AV	Song	Fearful	Normal	Kids	R2	A10	4	1	0	0
01-02-06-01-01-02-11.mp4	AV	Song	Fearful	Normal	Kids	R2	A11	6	6	1	1
01-02-06-01-01-02-12.mp4	AV	Song	Fearful	Normal	Kids	R2	A12	5	6	0	1
01-02-06-01-01-02-13.mp4	AV	Song	Fearful	Normal	Kids	R2	A13	1	1	0	0
01-02-06-01-01-02-14.mp4	AV	Song	Fearful	Normal	Kids	R2	A14	9	6	0	1
01-02-06-01-01-02-15.mp4	AV	Song	Fearful	Normal	Kids	R2	A15	6	6	1	1
01-02-06-01-01-02-16.mp4	AV	Song	Fearful	Normal	Kids	R2	A16	6	6	1	1
01-02-06-01-01-02-17.mp4	AV	Song	Fearful	Normal	Kids	R2	A17	4	4	0	0
01-02-06-01-01-02-19.mp4	AV	Song	Fearful	Normal	Kids	R2	A19	4	6	0	1
01-02-06-01-01-02-20.mp4	AV	Song	Fearful	Normal	Kids	R2	A20	6	6	1	1
01-02-06-01-01-02-21.mp4	AV	Song	Fearful	Normal	Kids	R2	A21	6	5	1	0
01-02-06-01-01-02-22.mp4	AV	Song	Fearful	Normal	Kids	R2	A22	2	1	0	0
01-02-06-01-01-02-23.mp4	AV	Song	Fearful	Normal	Kids	R2	A23	6	6	1	1
01-02-06-01-01-02-24.mp4	AV	Song	Fearful	Normal	Kids	R2	A24	6	6	1	1
01-02-06-01-02-01-01.mp4	AV	Song	Fearful	Normal	Dogs	R1	A1	4	6	0	1
01-02-06-01-02-01-02.mp4	AV	Song	Fearful	Normal	Dogs	R1	A2	4	4	0	0
01-02-06-01-02-01-03.mp4	AV	Song	Fearful	Normal	Dogs	R1	A3	6	9	1	0
01-02-06-01-02-01-04.mp4	AV	Song	Fearful	Normal	Dogs	R1	A4	6	6	1	1
01-02-06-01-02-01-05.mp4	AV	Song	Fearful	Normal	Dogs	R1	A5	6	6	1	1
01-02-06-01-02-01-06.mp4	AV	Song	Fearful	Normal	Dogs	R1	A6	4	4	0	0
01-02-06-01-02-01-07.mp4	AV	Song	Fearful	Normal	Dogs	R1	A7	9	6	0	1
01-02-06-01-02-01-08.mp4	AV	Song	Fearful	Normal	Dogs	R1	A8	6	6	1	1
01-02-06-01-02-01-09.mp4	AV	Song	Fearful	Normal	Dogs	R1	A9	6	6	1	1
01-02-06-01-02-01-10.mp4	AV	Song	Fearful	Normal	Dogs	R1	A10	1	1	0	0
01-02-06-01-02-01-11.mp4	AV	Song	Fearful	Normal	Dogs	R1	A11	6	6	1	1
01-02-06-01-02-01-12.mp4	AV	Song	Fearful	Normal	Dogs	R1	A12	6	6	1	1
01-02-06-01-02-01-13.mp4	AV	Song	Fearful	Normal	Dogs	R1	A13	1	1	0	0
01-02-06-01-02-01-14.mp4	AV	Song	Fearful	Normal	Dogs	R1	A14	6	6	1	1
01-02-06-01-02-01-15.mp4	AV	Song	Fearful	Normal	Dogs	R1	A15	6	6	1	1
01-02-06-01-02-01-16.mp4	AV	Song	Fearful	Normal	Dogs	R1	A16	6	6	1	1
01-02-06-01-02-01-17.mp4	AV	Song	Fearful	Normal	Dogs	R1	A17	4	4	0	0
01-02-06-01-02-01-19.mp4	AV	Song	Fearful	Normal	Dogs	R1	A19	6	6	1	1
01-02-06-01-02-01-20.mp4	AV	Song	Fearful	Normal	Dogs	R1	A20	6	2	1	0
01-02-06-01-02-01-21.mp4	AV	Song	Fearful	Normal	Dogs	R1	A21	6	5	1	0
01-02-06-01-02-01-22.mp4	AV	Song	Fearful	Normal	Dogs	R1	A22	1	1	0	0
01-02-06-01-02-01-23.mp4	AV	Song	Fearful	Normal	Dogs	R1	A23	6	6	1	1
01-02-06-01-02-01-24.mp4	AV	Song	Fearful	Normal	Dogs	R1	A24	6	6	1	1
01-02-06-01-02-02-01.mp4	AV	Song	Fearful	Normal	Dogs	R2	A1	4	6	0	1
01-02-06-01-02-02-02.mp4	AV	Song	Fearful	Normal	Dogs	R2	A2	6	6	1	1
01-02-06-01-02-02-03.mp4	AV	Song	Fearful	Normal	Dogs	R2	A3	6	6	1	1
01-02-06-01-02-02-04.mp4	AV	Song	Fearful	Normal	Dogs	R2	A4	6	9	1	0
01-02-06-01-02-02-05.mp4	AV	Song	Fearful	Normal	Dogs	R2	A5	6	4	1	0
01-02-06-01-02-02-06.mp4	AV	Song	Fearful	Normal	Dogs	R2	A6	6	6	1	1
01-02-06-01-02-02-07.mp4	AV	Song	Fearful	Normal	Dogs	R2	A7	6	6	1	1
01-02-06-01-02-02-08.mp4	AV	Song	Fearful	Normal	Dogs	R2	A8	6	6	1	1
01-02-06-01-02-02-09.mp4	AV	Song	Fearful	Normal	Dogs	R2	A9	6	6	1	1
01-02-06-01-02-02-10.mp4	AV	Song	Fearful	Normal	Dogs	R2	A10	6	4	1	0
01-02-06-01-02-02-11.mp4	AV	Song	Fearful	Normal	Dogs	R2	A11	6	6	1	1
01-02-06-01-02-02-12.mp4	AV	Song	Fearful	Normal	Dogs	R2	A12	6	6	1	1
01-02-06-01-02-02-13.mp4	AV	Song	Fearful	Normal	Dogs	R2	A13	1	1	0	0
01-02-06-01-02-02-14.mp4	AV	Song	Fearful	Normal	Dogs	R2	A14	6	6	1	1
01-02-06-01-02-02-15.mp4	AV	Song	Fearful	Normal	Dogs	R2	A15	6	4	1	0
01-02-06-01-02-02-16.mp4	AV	Song	Fearful	Normal	Dogs	R2	A16	4	6	0	1
01-02-06-01-02-02-17.mp4	AV	Song	Fearful	Normal	Dogs	R2	A17	4	4	0	0
01-02-06-01-02-02-19.mp4	AV	Song	Fearful	Normal	Dogs	R2	A19	4	4	0	0
01-02-06-01-02-02-20.mp4	AV	Song	Fearful	Normal	Dogs	R2	A20	6	6	1	1
01-02-06-01-02-02-21.mp4	AV	Song	Fearful	Normal	Dogs	R2	A21	1	4	0	0
01-02-06-01-02-02-22.mp4	AV	Song	Fearful	Normal	Dogs	R2	A22	1	6	0	1
01-02-06-01-02-02-23.mp4	AV	Song	Fearful	Normal	Dogs	R2	A23	6	5	1	0
01-02-06-01-02-02-24.mp4	AV	Song	Fearful	Normal	Dogs	R2	A24	6	6	1	1
01-02-06-02-01-01-01.mp4	AV	Song	Fearful	Strong	Kids	R1	A1	6	6	1	1
01-02-06-02-01-01-02.mp4	AV	Song	Fearful	Strong	Kids	R1	A2	4	5	0	0
01-02-06-02-01-01-03.mp4	AV	Song	Fearful	Strong	Kids	R1	A3	6	6	1	1
01-02-06-02-01-01-04.mp4	AV	Song	Fearful	Strong	Kids	R1	A4	6	6	1	1
01-02-06-02-01-01-05.mp4	AV	Song	Fearful	Strong	Kids	R1	A5	6	6	1	1
01-02-06-02-01-01-06.mp4	AV	Song	Fearful	Strong	Kids	R1	A6	6	6	1	1
01-02-06-02-01-01-07.mp4	AV	Song	Fearful	Strong	Kids	R1	A7	6	6	1	1
01-02-06-02-01-01-08.mp4	AV	Song	Fearful	Strong	Kids	R1	A8	6	6	1	1
01-02-06-02-01-01-09.mp4	AV	Song	Fearful	Strong	Kids	R1	A9	6	6	1	1
01-02-06-02-01-01-10.mp4	AV	Song	Fearful	Strong	Kids	R1	A10	6	6	1	1
01-02-06-02-01-01-11.mp4	AV	Song	Fearful	Strong	Kids	R1	A11	6	6	1	1
01-02-06-02-01-01-12.mp4	AV	Song	Fearful	Strong	Kids	R1	A12	6	6	1	1
01-02-06-02-01-01-13.mp4	AV	Song	Fearful	Strong	Kids	R1	A13	6	4	1	0
01-02-06-02-01-01-14.mp4	AV	Song	Fearful	Strong	Kids	R1	A14	6	6	1	1
01-02-06-02-01-01-15.mp4	AV	Song	Fearful	Strong	Kids	R1	A15	4	4	0	0
01-02-06-02-01-01-16.mp4	AV	Song	Fearful	Strong	Kids	R1	A16	6	6	1	1
01-02-06-02-01-01-17.mp4	AV	Song	Fearful	Strong	Kids	R1	A17	4	4	0	0
01-02-06-02-01-01-19.mp4	AV	Song	Fearful	Strong	Kids	R1	A19	4	4	0	0
01-02-06-02-01-01-20.mp4	AV	Song	Fearful	Strong	Kids	R1	A20	6	6	1	1
01-02-06-02-01-01-21.mp4	AV	Song	Fearful	Strong	Kids	R1	A21	6	6	1	1
01-02-06-02-01-01-22.mp4	AV	Song	Fearful	Strong	Kids	R1	A22	6	6	1	1
01-02-06-02-01-01-23.mp4	AV	Song	Fearful	Strong	Kids	R1	A23	6	6	1	1
01-02-06-02-01-01-24.mp4	AV	Song	Fearful	Strong	Kids	R1	A24	6	6	1	1
01-02-06-02-01-02-01.mp4	AV	Song	Fearful	Strong	Kids	R2	A1	6	6	1	1
01-02-06-02-01-02-02.mp4	AV	Song	Fearful	Strong	Kids	R2	A2	6	6	1	1
01-02-06-02-01-02-03.mp4	AV	Song	Fearful	Strong	Kids	R2	A3	6	6	1	1
01-02-06-02-01-02-04.mp4	AV	Song	Fearful	Strong	Kids	R2	A4	6	6	1	1
01-02-06-02-01-02-05.mp4	AV	Song	Fearful	Strong	Kids	R2	A5	6	6	1	1
01-02-06-02-01-02-06.mp4	AV	Song	Fearful	Strong	Kids	R2	A6	5	4	0	0
01-02-06-02-01-02-07.mp4	AV	Song	Fearful	Strong	Kids	R2	A7	6	9	1	0
01-02-06-02-01-02-08.mp4	AV	Song	Fearful	Strong	Kids	R2	A8	4	4	0	0
01-02-06-02-01-02-09.mp4	AV	Song	Fearful	Strong	Kids	R2	A9	6	6	1	1
01-02-06-02-01-02-10.mp4	AV	Song	Fearful	Strong	Kids	R2	A10	6	6	1	1
01-02-06-02-01-02-11.mp4	AV	Song	Fearful	Strong	Kids	R2	A11	6	6	1	1
01-02-06-02-01-02-12.mp4	AV	Song	Fearful	Strong	Kids	R2	A12	6	6	1	1
01-02-06-02-01-02-13.mp4	AV	Song	Fearful	Strong	Kids	R2	A13	6	6	1	1
01-02-06-02-01-02-14.mp4	AV	Song	Fearful	Strong	Kids	R2	A14	6	6	1	1
01-02-06-02-01-02-15.mp4	AV	Song	Fearful	Strong	Kids	R2	A15	6	6	1	1
01-02-06-02-01-02-16.mp4	AV	Song	Fearful	Strong	Kids	R2	A16	4	6	0	1
01-02-06-02-01-02-17.mp4	AV	Song	Fearful	Strong	Kids	R2	A17	6	6	1	1
01-02-06-02-01-02-19.mp4	AV	Song	Fearful	Strong	Kids	R2	A19	6	6	1	1
01-02-06-02-01-02-20.mp4	AV	Song	Fearful	Strong	Kids	R2	A20	6	6	1	1
01-02-06-02-01-02-21.mp4	AV	Song	Fearful	Strong	Kids	R2	A21	6	6	1	1
01-02-06-02-01-02-22.mp4	AV	Song	Fearful	Strong	Kids	R2	A22	9	6	0	1
01-02-06-02-01-02-23.mp4	AV	Song	Fearful	Strong	Kids	R2	A23	6	6	1	1
01-02-06-02-01-02-24.mp4	AV	Song	Fearful	Strong	Kids	R2	A24	9	9	0	0
01-02-06-02-02-01-01.mp4	AV	Song	Fearful	Strong	Dogs	R1	A1	6	6	1	1
01-02-06-02-02-01-02.mp4	AV	Song	Fearful	Strong	Dogs	R1	A2	6	6	1	1
01-02-06-02-02-01-03.mp4	AV	Song	Fearful	Strong	Dogs	R1	A3	6	6	1	1
01-02-06-02-02-01-04.mp4	AV	Song	Fearful	Strong	Dogs	R1	A4	6	6	1	1
01-02-06-02-02-01-05.mp4	AV	Song	Fearful	Strong	Dogs	R1	A5	6	6	1	1
01-02-06-02-02-01-06.mp4	AV	Song	Fearful	Strong	Dogs	R1	A6	6	5	1	0
01-02-06-02-02-01-07.mp4	AV	Song	Fearful	Strong	Dogs	R1	A7	6	6	1	1
01-02-06-02-02-01-08.mp4	AV	Song	Fearful	Strong	Dogs	R1	A8	6	6	1	1
01-02-06-02-02-01-09.mp4	AV	Song	Fearful	Strong	Dogs	R1	A9	6	6	1	1
01-02-06-02-02-01-10.mp4	AV	Song	Fearful	Strong	Dogs	R1	A10	6	6	1	1
01-02-06-02-02-01-11.mp4	AV	Song	Fearful	Strong	Dogs	R1	A11	6	9	1	0
01-02-06-02-02-01-12.mp4	AV	Song	Fearful	Strong	Dogs	R1	A12	6	6	1	1
01-02-06-02-02-01-13.mp4	AV	Song	Fearful	Strong	Dogs	R1	A13	6	6	1	1
01-02-06-02-02-01-14.mp4	AV	Song	Fearful	Strong	Dogs	R1	A14	6	6	1	1
01-02-06-02-02-01-15.mp4	AV	Song	Fearful	Strong	Dogs	R1	A15	6	6	1	1
01-02-06-02-02-01-16.mp4	AV	Song	Fearful	Strong	Dogs	R1	A16	6	6	1	1
01-02-06-02-02-01-17.mp4	AV	Song	Fearful	Strong	Dogs	R1	A17	6	6	1	1
01-02-06-02-02-01-19.mp4	AV	Song	Fearful	Strong	Dogs	R1	A19	4	6	0	1
01-02-06-02-02-01-20.mp4	AV	Song	Fearful	Strong	Dogs	R1	A20	6	6	1	1
01-02-06-02-02-01-21.mp4	AV	Song	Fearful	Strong	Dogs	R1	A21	6	6	1	1
01-02-06-02-02-01-22.mp4	AV	Song	Fearful	Strong	Dogs	R1	A22	6	9	1	0
01-02-06-02-02-01-23.mp4	AV	Song	Fearful	Strong	Dogs	R1	A23	6	6	1	1
01-02-06-02-02-01-24.mp4	AV	Song	Fearful	Strong	Dogs	R1	A24	6	6	1	1
01-02-06-02-02-02-01.mp4	AV	Song	Fearful	Strong	Dogs	R2	A1	9	6	0	1
01-02-06-02-02-02-02.mp4	AV	Song	Fearful	Strong	Dogs	R2	A2	6	6	1	1
01-02-06-02-02-02-03.mp4	AV	Song	Fearful	Strong	Dogs	R2	A3	6	4	1	0
01-02-06-02-02-02-04.mp4	AV	Song	Fearful	Strong	Dogs	R2	A4	9	9	0	0
01-02-06-02-02-02-05.mp4	AV	Song	Fearful	Strong	Dogs	R2	A5	6	6	1	1
01-02-06-02-02-02-06.mp4	AV	Song	Fearful	Strong	Dogs	R2	A6	5	6	0	1
01-02-06-02-02-02-07.mp4	AV	Song	Fearful	Strong	Dogs	R2	A7	9	6	0	1
01-02-06-02-02-02-08.mp4	AV	Song	Fearful	Strong	Dogs	R2	A8	5	6	0	1
01-02-06-02-02-02-09.mp4	AV	Song	Fearful	Strong	Dogs	R2	A9	5	6	0	1
01-02-06-02-02-02-10.mp4	AV	Song	Fearful	Strong	Dogs	R2	A10	6	6	1	1
01-02-06-02-02-02-11.mp4	AV	Song	Fearful	Strong	Dogs	R2	A11	6	5	1	0
01-02-06-02-02-02-12.mp4	AV	Song	Fearful	Strong	Dogs	R2	A12	6	6	1	1
01-02-06-02-02-02-13.mp4	AV	Song	Fearful	Strong	Dogs	R2	A13	6	9	1	0
01-02-06-02-02-02-14.mp4	AV	Song	Fearful	Strong	Dogs	R2	A14	6	6	1	1
01-02-06-02-02-02-15.mp4	AV	Song	Fearful	Strong	Dogs	R2	A15	6	6	1	1
01-02-06-02-02-02-16.mp4	AV	Song	Fearful	Strong	Dogs	R2	A16	4	4	0	0
01-02-06-02-02-02-17.mp4	AV	Song	Fearful	Strong	Dogs	R2	A17	6	6	1	1
01-02-06-02-02-02-19.mp4	AV	Song	Fearful	Strong	Dogs	R2	A19	4	6	0	1
01-02-06-02-02-02-20.mp4	AV	Song	Fearful	Strong	Dogs	R2	A20	6	6	1	1
01-02-06-02-02-02-21.mp4	AV	Song	Fearful	Strong	Dogs	R2	A21	6	6	1	1
01-02-06-02-02-02-22.mp4	AV	Song	Fearful	Strong	Dogs	R2	A22	6	6	1	1
01-02-06-02-02-02-23.mp4	AV	Song	Fearful	Strong	Dogs	R2	A23	6	6	1	1
01-02-06-02-02-02-24.mp4	AV	Song	Fearful	Strong	Dogs	R2	A24	6	6	1	1
02-02-01-01-01-01-01.mp4	VO	Song	Neutral	Normal	Kids	R1	A1	6	4	0	0
02-02-01-01-01-01-02.mp4	VO	Song	Neutral	Normal	Kids	R1	A2	1	1	1	1
02-02-01-01-01-01-03.mp4	VO	Song	Neutral	Normal	Kids	R1	A3	4	5	0	0
02-02-01-01-01-01-04.mp4	VO	Song	Neutral	Normal	Kids	R1	A4	1	1	1	1
02-02-01-01-01-01-05.mp4	VO	Song	Neutral	Normal	Kids	R1	A5	2	4	1	0
02-02-01-01-01-01-06.mp4	VO	Song	Neutral	Normal	Kids	R1	A6	4	4	0	0
02-02-01-01-01-01-07.mp4	VO	Song	Neutral	Normal	Kids	R1	A7	4	1	0	1
02-02-01-01-01-01-08.mp4	VO	Song	Neutral	Normal	Kids	R1	A8	1	1	1	1
02-02-01-01-01-01-09.mp4	VO	Song	Neutral	Normal	Kids	R1	A9	1	1	1	1
02-02-01-01-01-01-10.mp4	VO	Song	Neutral	Normal	Kids	R1	A10	1	1	1	1
02-02-01-01-01-01-11.mp4	VO	Song	Neutral	Normal	Kids	R1	A11	1	1	1	1
02-02-01-01-01-01-12.mp4	VO	Song	Neutral	Normal	Kids	R1	A12	2	4	1	0
02-02-01-01-01-01-13.mp4	VO	Song	Neutral	Normal	Kids	R1	A13	1	1	1	1
02-02-01-01-01-01-14.mp4	VO	Song	Neutral	Normal	Kids	R1	A14	1	1	1	1
02-02-01-01-01-01-15.mp4	VO	Song	Neutral	Normal	Kids	R1	A15	1	1	1	1
02-02-01-01-01-01-16.mp4	VO	Song	Neutral	Normal	Kids	R1	A16	1	1	1	1
02-02-01-01-01-01-17.mp4	VO	Song	Neutral	Normal	Kids	R1	A17	4	4	0	0
02-02-01-01-01-01-19.mp4	VO	Song	Neutral	Normal	Kids	R1	A19	1	1	1	1
02-02-01-01-01-01-20.mp4	VO	Song	Neutral	Normal	Kids	R1	A20	1	1	1	1
02-02-01-01-01-01-21.mp4	VO	Song	Neutral	Normal	Kids	R1	A21	2	1	1	1
02-02-01-01-01-01-22.mp4	VO	Song	Neutral	Normal	Kids	R1	A22	1	1	1	1
02-02-01-01-01-01-23.mp4	VO	Song	Neutral	Normal	Kids	R1	A23	2	2	1	1
02-02-01-01-01-01-24.mp4	VO	Song	Neutral	Normal	Kids	R1	A24	2	2	1	1
02-02-01-01-01-02-01.mp4	VO	Song	Neutral	Normal	Kids	R2	A1	4	4	0	0
02-02-01-01-01-02-02.mp4	VO	Song	Neutral	Normal	Kids	R2	A2	1	1	1	1
02-02-01-01-01-02-03.mp4	VO	Song	Neutral	Normal	Kids	R2	A3	5	5	0	0
02-02-01-01-01-02-04.mp4	VO	Song	Neutral	Normal	Kids	R2	A4	1	1	1	1
02-02-01-01-01-02-05.mp4	VO	Song	Neutral	Normal	Kids	R2	A5	1	4	1	0
02-02-01-01-01-02-06.mp4	VO	Song	Neutral	Normal	Kids	R2	A6	2	2	1	1
02-02-01-01-01-02-07.mp4	VO	Song	Neutral	Normal	Kids	R2	A7	4	4	0	0
02-02-01-01-01-02-08.mp4	VO	Song	Neutral	Normal	Kids	R2	A8	9	9	0	0
02-02-01-01-01-02-09.mp4	VO	Song	Neutral	Normal	Kids	R2	A9	1	1	1	1
02-02-01-01-01-02-10.mp4	VO	Song	Neutral	Normal	Kids	R2	A10	4	1	0	1
02-02-01-01-01-02-11.mp4	VO	Song	Neutral	Normal	Kids	R2	A11	1	1	1	1
02-02-01-01-01-02-12.mp4	VO	Song	Neutral	Normal	Kids	R2	A12	5	5	0	0
02-02-01-01-01-02-13.mp4	VO	Song	Neutral	Normal	Kids	R2	A13	1	1	1	1
02-02-01-01-01-02-14.mp4	VO	Song	Neutral	Normal	Kids	R2	A14	2	1	1	1
02-02-01-01-01-02-15.mp4	VO	Song	Neutral	Normal	Kids	R2	A15	2	1	1	1
02-02-01-01-01-02-16.mp4	VO	Song	Neutral	Normal	Kids	R2	A16	1	1	1	1
02-02-01-01-01-02-17.mp4	VO	Song	Neutral	Normal	Kids	R2	A17	1	1	1	1
02-02-01-01-01-02-19.mp4	VO	Song	Neutral	Normal	Kids	R2	A19	1	1	1	1
02-02-01-01-01-02-20.mp4	VO	Song	Neutral	Normal	Kids	R2	A20	1	1	1	1
02-02-01-01-01-02-21.mp4	VO	Song	Neutral	Normal	Kids	R2	A21	1	1	1	1
02-02-01-01-01-02-22.mp4	VO	Song	Neutral	Normal	Kids	R2	A22	2	2	1	1
02-02-01-01-01-02-23.mp4	VO	Song	Neutral	Normal	Kids	R2	A23	1	1	1	1
02-02-01-01-01-02-24.mp4	VO	Song	Neutral	Normal	Kids	R2	A24	1	1	1	1
02-02-01-01-02-01-01.mp4	VO	Song	Neutral	Normal	Dogs	R1	A1	2	1	1	1
02-02-01-01-02-01-02.mp4	VO	Song	Neutral	Normal	Dogs	R1	A2	1	1	1	1
02-02-01-01-02-01-03.mp4	VO	Song	Neutral	Normal	Dogs	R1	A3	1	1	1	1
02-02-01-01-02-01-04.mp4	VO	Song	Neutral	Normal	Dogs	R1	A4	1	1	1	1
02-02-01-01-02-01-05.mp4	VO	Song	Neutral	Normal	Dogs	R1	A5	4	4	0	0
02-02-01-01-02-01-06.mp4	VO	Song	Neutral	Normal	Dogs	R1	A6	1	1	1	1
02-02-01-01-02-01-07.mp4	VO	Song	Neutral	Normal	Dogs	R1	A7	1	1	1	1
02-02-01-01-02-01-08.mp4	VO	Song	Neutral	Normal	Dogs	R1	A8	1	1	1	1
02-02-01-01-02-01-09.mp4	VO	Song	Neutral	Normal	Dogs	R1	A9	1	1	1	1
02-02-01-01-02-01-10.mp4	VO	Song	Neutral	Normal	Dogs	R1	A10	1	4	1	0
02-02-01-01-02-01-11.mp4	VO	Song	Neutral	Normal	Dogs	R1	A11	1	1	1	1
02-02-01-01-02-01-12.mp4	VO	Song	Neutral	Normal	Dogs	R1	A12	1	1	1	1
02-02-01-01-02-01-13.mp4	VO	Song	Neutral	Normal	Dogs	R1	A13	1	1	1	1
02-02-01-01-02-01-14.mp4	VO	Song	Neutral	Normal	Dogs	R1	A14	1	2	1	1
02-02-01-01-02-01-15.mp4	VO	Song	Neutral	Normal	Dogs	R1	A15	1	3	1	0
02-02-01-01-02-01-16.mp4	VO	Song	Neutral	Normal	Dogs	R1	A16	1	1	1	1
02-02-01-01-02-01-17.mp4	VO	Song	Neutral	Normal	Dogs	R1	A17	1	1	1	1
02-02-01-01-02-01-19.mp4	VO	Song	Neutral	Normal	Dogs	R1	A19	1	2	1	1
02-02-01-01-02-01-20.mp4	VO	Song	Neutral	Normal	Dogs	R1	A20	1	1	1	1
02-02-01-01-02-01-21.mp4	VO	Song	Neutral	Normal	Dogs	R1	A21	1	1	1	1
02-02-01-01-02-01-22.mp4	VO	Song	Neutral	Normal	Dogs	R1	A22	4	1	0	1
02-02-01-01-02-01-23.mp4	VO	Song	Neutral	Normal	Dogs	R1	A23	1	1	1	1
02-02-01-01-02-01-24.mp4	VO	Song	Neutral	Normal	Dogs	R1	A24	1	1	1	1
02-02-01-01-02-02-01.mp4	VO	Song	Neutral	Normal	Dogs	R2	A1	1	1	1	1
02-02-01-01-02-02-02.mp4	VO	Song	Neutral	Normal	Dogs	R2	A2	4	2	0	1
02-02-01-01-02-02-03.mp4	VO	Song	Neutral	Normal	Dogs	R2	A3	4	4	0	0
02-02-01-01-02-02-04.mp4	VO	Song	Neutral	Normal	Dogs	R2	A4	1	9	1	0
02-02-01-01-02-02-05.mp4	VO	Song	Neutral	Normal	Dogs	R2	A5	1	1	1	1
02-02-01-01-02-02-06.mp4	VO	Song	Neutral	Normal	Dogs	R2	A6	1	1	1	1
02-02-01-01-02-02-07.mp4	VO	Song	Neutral	Normal	Dogs	R2	A7	1	1	1	1
02-02-01-01-02-02-08.mp4	VO	Song	Neutral	Normal	Dogs	R2	A8	2	2	1	1
02-02-01-01-02-02-09.mp4	VO	Song	Neutral	Normal	Dogs	R2	A9	1	1	1	1
02-02-01-01-02-02-10.mp4	VO	Song	Neutral	Normal	Dogs	R2	A10	4	2	0	1
02-02-01-01-02-02-11.mp4	VO	Song	Neutral	Normal	Dogs	R2	A11	1	1	1	1
02-02-01-01-02-02-12.mp4	VO	Song	Neutral	Normal	Dogs	R2	A12	1	1	1	1
02-02-01-01-02-02-13.mp4	VO	Song	Neutral	Normal	Dogs	R2	A13	1	1	1	1
02-02-01-01-02-02-14.mp4	VO	Song	Neutral	Normal	Dogs	R2	A14	1	1	1	1
02-02-01-01-02-02-15.mp4	VO	Song	Neutral	Normal	Dogs	R2	A15	1	1	1	1
02-02-01-01-02-02-16.mp4	VO	Song	Neutral	Normal	Dogs	R2	A16	1	1	1	1
02-02-01-01-02-02-17.mp4	VO	Song	Neutral	Normal	Dogs	R2	A17	4	4	0	0
02-02-01-01-02-02-19.mp4	VO	Song	Neutral	Normal	Dogs	R2	A19	4	1	0	1
02-02-01-01-02-02-20.mp4	VO	Song	Neutral	Normal	Dogs	R2	A20	1	1	1	1
02-02-01-01-02-02-21.mp4	VO	Song	Neutral	Normal	Dogs	R2	A21	1	1	1	1
02-02-01-01-02-02-22.mp4	VO	Song	Neutral	Normal	Dogs	R2	A22	1	1	1	1
02-02-01-01-02-02-23.mp4	VO	Song	Neutral	Normal	Dogs	R2	A23	2	2	1	1
02-02-01-01-02-02-24.mp4	VO	Song	Neutral	Normal	Dogs	R2	A24	1	1	1	1
02-02-02-01-01-01-01.mp4	VO	Song	Calm	Normal	Kids	R1	A1	3	3	0	0
02-02-02-01-01-01-02.mp4	VO	Song	Calm	Normal	Kids	R1	A2	3	2	0	1
02-02-02-01-01-01-03.mp4	VO	Song	Calm	Normal	Kids	R1	A3	2	4	1	0
02-02-02-01-01-01-04.mp4	VO	Song	Calm	Normal	Kids	R1	A4	1	1	1	1
02-02-02-01-01-01-05.mp4	VO	Song	Calm	Normal	Kids	R1	A5	2	3	1	0
02-02-02-01-01-01-06.mp4	VO	Song	Calm	Normal	Kids	R1	A6	4	2	0	1
02-02-02-01-01-01-07.mp4	VO	Song	Calm	Normal	Kids	R1	A7	4	2	0	1
02-02-02-01-01-01-08.mp4	VO	Song	Calm	Normal	Kids	R1	A8	3	3	0	0
02-02-02-01-01-01-09.mp4	VO	Song	Calm	Normal	Kids	R1	A9	4	2	0	1
02-02-02-01-01-01-10.mp4	VO	Song	Calm	Normal	Kids	R1	A10	2	2	1	1
02-02-02-01-01-01-11.mp4	VO	Song	Calm	Normal	Kids	R1	A11	1	2	1	1
02-02-02-01-01-01-12.mp4	VO	Song	Calm	Normal	Kids	R1	A12	2	3	1	0
02-02-02-01-01-01-13.mp4	VO	Song	Calm	Normal	Kids	R1	A13	1	2	1	1
02-02-02-01-01-01-14.mp4	VO	Song	Calm	Normal	Kids	R1	A14	3	3	0	0
02-02-02-01-01-01-15.mp4	VO	Song	Calm	Normal	Kids	R1	A15	2	2	1	1
02-02-02-01-01-01-16.mp4	VO	Song	Calm	Normal	Kids	R1	A16	3	3	0	0
02-02-02-01-01-01-17.mp4	VO	Song	Calm	Normal	Kids	R1	A17	2	2	1	1
02-02-02-01-01-01-19.mp4	VO	Song	Calm	Normal	Kids	R1	A19	2	2	1	1
02-02-02-01-01-01-20.mp4	VO	Song	Calm	Normal	Kids	R1	A20	2	3	1	0
02-02-02-01-01-01-21.mp4	VO	Song	Calm	Normal	Kids	R1	A21	2	1	1	1
02-02-02-01-01-01-22.mp4	VO	Song	Calm	Normal	Kids	R1	A22	2	2	1	1
02-02-02-01-01-01-23.mp4	VO	Song	Calm	Normal	Kids	R1	A23	2	3	1	0
02-02-02-01-01-01-24.mp4	VO	Song	Calm	Normal	Kids	R1	A24	3	3	0	0
02-02-02-01-01-02-01.mp4	VO	Song	Calm	Normal	Kids	R2	A1	2	3	1	0
02-02-02-01-01-02-02.mp4	VO	Song	Calm	Normal	Kids	R2	A2	3	2	0	1
02-02-02-01-01-02-03.mp4	VO	Song	Calm	Normal	Kids	R2	A3	2	1	1	1
02-02-02-01-01-02-04.mp4	VO	Song	Calm	Normal	Kids	R2	A4	3	3	0	0
02-02-02-01-01-02-05.mp4	VO	Song	Calm	Normal	Kids	R2	A5	3	3	0	0
02-02-02-01-01-02-06.mp4	VO	Song	Calm	Normal	Kids	R2	A6	1	1	1	1
02-02-02-01-01-02-07.mp4	VO	Song	Calm	Normal	Kids	R2	A7	2	2	1	1
02-02-02-01-01-02-08.mp4	VO	Song	Calm	Normal	Kids	R2	A8	3	3	0	0
02-02-02-01-01-02-09.mp4	VO	Song	Calm	Normal	Kids	R2	A9	2	9	1	0
02-02-02-01-01-02-10.mp4	VO	Song	Calm	Normal	Kids	R2	A10	1	2	1	1
02-02-02-01-01-02-11.mp4	VO	Song	Calm	Normal	Kids	R2	A11	3	3	0	0
02-02-02-01-01-02-12.mp4	VO	Song	Calm	Normal	Kids	R2	A12	1	1	1	1
02-02-02-01-01-02-13.mp4	VO	Song	Calm	Normal	Kids	R2	A13	2	1	1	1
02-02-02-01-01-02-14.mp4	VO	Song	Calm	Normal	Kids	R2	A14	2	6	1	0
02-02-02-01-01-02-15.mp4	VO	Song	Calm	Normal	Kids	R2	A15	2	2	1	1
02-02-02-01-01-02-16.mp4	VO	Song	Calm	Normal	Kids	R2	A16	4	3	0	0
02-02-02-01-01-02-17.mp4	VO	Song	Calm	Normal	Kids	R2	A17	4	4	0	0
02-02-02-01-01-02-19.mp4	VO	Song	Calm	Normal	Kids	R2	A19	2	3	1	0
02-02-02-01-01-02-20.mp4	VO	Song	Calm	Normal	Kids	R2	A20	2	2	1	1
02-02-02-01-01-02-21.mp4	VO	Song	Calm	Normal	Kids	R2	A21	3	3	0	0
02-02-02-01-01-02-22.mp4	VO	Song	Calm	Normal	Kids	R2	A22	3	3	0	0
02-02-02-01-01-02-23.mp4	VO	Song	Calm	Normal	Kids	R2	A23	2	3	1	0
02-02-02-01-01-02-24.mp4	VO	Song	Calm	Normal	Kids	R2	A24	4	3	0	0
02-02-02-01-02-01-01.mp4	VO	Song	Calm	Normal	Dogs	R1	A1	2	2	1	1
02-02-02-01-02-01-02.mp4	VO	Song	Calm	Normal	Dogs	R1	A2	1	2	1	1
02-02-02-01-02-01-03.mp4	VO	Song	Calm	Normal	Dogs	R1	A3	4	4	0	0
02-02-02-01-02-01-04.mp4	VO	Song	Calm	Normal	Dogs	R1	A4	2	2	1	1
02-02-02-01-02-01-05.mp4	VO	Song	Calm	Normal	Dogs	R1	A5	2	2	1	1
02-02-02-01-02-01-06.mp4	VO	Song	Calm	Normal	Dogs	R1	A6	2	2	1	1
02-02-02-01-02-01-07.mp4	VO	Song	Calm	Normal	Dogs	R1	A7	2	2	1	1
02-02-02-01-02-01-08.mp4	VO	Song	Calm	Normal	Dogs	R1	A8	3	3	0	0
02-02-02-01-02-01-09.mp4	VO	Song	Calm	Normal	Dogs	R1	A9	1	1	1	1
02-02-02-01-02-01-10.mp4	VO	Song	Calm	Normal	Dogs	R1	A10	3	3	0	0
02-02-02-01-02-01-11.mp4	VO	Song	Calm	Normal	Dogs	R1	A11	1	1	1	1
02-02-02-01-02-01-12.mp4	VO	Song	Calm	Normal	Dogs	R1	A12	1	2	1	1
02-02-02-01-02-01-13.mp4	VO	Song	Calm	Normal	Dogs	R1	A13	2	1	1	1
02-02-02-01-02-01-14.mp4	VO	Song	Calm	Normal	Dogs	R1	A14	9	2	0	1
02-02-02-01-02-01-15.mp4	VO	Song	Calm	Normal	Dogs	R1	A15	3	3	0	0
02-02-02-01-02-01-16.mp4	VO	Song	Calm	Normal	Dogs	R1	A16	3	3	0	0
02-02-02-01-02-01-17.mp4	VO	Song	Calm	Normal	Dogs	R1	A17	2	2	1	1
02-02-02-01-02-01-19.mp4	VO	Song	Calm	Normal	Dogs	R1	A19	2	4	1	0
02-02-02-01-02-01-20.mp4	VO	Song	Calm	Normal	Dogs	R1	A20	3	3	0	0
02-02-02-01-02-01-21.mp4	VO	Song	Calm	Normal	Dogs	R1	A21	1	2	1	1
02-02-02-01-02-01-22.mp4	VO	Song	Calm	Normal	Dogs	R1	A22	2	2	1	1
02-02-02-01-02-01-23.mp4	VO	Song	Calm	Normal	Dogs	R1	A23	1	2	1	1
02-02-02-01-02-01-24.mp4	VO	Song	Calm	Normal	Dogs	R1	A24	6	6	0	0
02-02-02-01-02-02-01.mp4	VO	Song	Calm	Normal	Dogs	R2	A1	1	1	1	1
02-02-02-01-02-02-02.mp4	VO	Song	Calm	Normal	Dogs	R2	A2	1	5	1	0
02-02-02-01-02-02-03.mp4	VO	Song	Calm	Normal	Dogs	R2	A3	4	2	0	1
02-02-02-01-02-02-04.mp4	VO	Song	Calm	Normal	Dogs	R2	A4	2	2	1	1
02-02-02-01-02-02-05.mp4	VO	Song	Calm	Normal	Dogs	R2	A5	3	3	0	0
02-02-02-01-02-02-06.mp4	VO	Song	Calm	Normal	Dogs	R2	A6	4	4	0	0
02-02-02-01-02-02-07.mp4	VO	Song	Calm	Normal	Dogs	R2	A7	4	1	0	1
02-02-02-01-02-02-08.mp4	VO	Song	Calm	Normal	Dogs	R2	A8	3	3	0	0
02-02-02-01-02-02-09.mp4	VO	Song	Calm	Normal	Dogs	R2	A9	2	1	1	1
02-02-02-01-02-02-10.mp4	VO	Song	Calm	Normal	Dogs	R2	A10	3	3	0	0
02-02-02-01-02-02-11.mp4	VO	Song	Calm	Normal	Dogs	R2	A11	1	6	1	0
02-02-02-01-02-02-12.mp4	VO	Song	Calm	Normal	Dogs	R2	A12	3	3	0	0
02-02-02-01-02-02-13.mp4	VO	Song	Calm	Normal	Dogs	R2	A13	1	1	1	1
02-02-02-01-02-02-14.mp4	VO	Song	Calm	Normal	Dogs	R2	A14	2	2	1	1
02-02-02-01-02-02-15.mp4	VO	Song	Calm	Normal	Dogs	R2	A15	2	1	1	1
02-02-02-01-02-02-16.mp4	VO	Song	Calm	Normal	Dogs	R2	A16	2	2	1	1
02-02-02-01-02-02-17.mp4	VO	Song	Calm	Normal	Dogs	R2	A17	2	2	1	1
02-02-02-01-02-02-19.mp4	VO	Song	Calm	Normal	Dogs	R2	A19	2	3	1	0
02-02-02-01-02-02-20.mp4	VO	Song	Calm	Normal	Dogs	R2	A20	3	3	0	0
02-02-02-01-02-02-21.mp4	VO	Song	Calm	Normal	Dogs	R2	A21	1	1	1	1
02-02-02-01-02-02-22.mp4	VO	Song	Calm	Normal	Dogs	R2	A22	3	2	0	1
02-02-02-01-02-02-23.mp4	VO	Song	Calm	Normal	Dogs	R2	A23	2	2	1	1
02-02-02-01-02-02-24.mp4	VO	Song	Calm	Normal	Dogs	R2	A24	3	3	0	0
02-02-02-02-01-01-01.mp4	VO	Song	Calm	Strong	Kids	R1	A1	2	3	1	0
02-02-02-02-01-01-02.mp4	VO	Song	Calm	Strong	Kids	R1	A2	2	2	1	1
02-02-02-02-01-01-03.mp4	VO	Song	Calm	Strong	Kids	R1	A3	4	2	0	1
02-02-02-02-01-01-04.mp4	VO	Song	Calm	Strong	Kids	R1	A4	3	3	0	0
02-02-02-02-01-01-05.mp4	VO	Song	Calm	Strong	Kids	R1	A5	3	3	0	0
02-02-02-02-01-01-06.mp4	VO	Song	Calm	Strong	Kids	R1	A6	1	4	1	0
02-02-02-02-01-01-07.mp4	VO	Song	Calm	Strong	Kids	R1	A7	2	3	1	0
02-02-02-02-01-01-08.mp4	VO	Song	Calm	Strong	Kids	R1	A8	2	3	1	0
02-02-02-02-01-01-09.mp4	VO	Song	Calm	Strong	Kids	R1	A9	2	4	1	0
02-02-02-02-01-01-10.mp4	VO	Song	Calm	Strong	Kids	R1	A10	2	2	1	1
02-02-02-02-01-01-11.mp4	VO	Song	Calm	Strong	Kids	R1	A11	2	1	1	1
02-02-02-02-01-01-12.mp4	VO	Song	Calm	Strong	Kids	R1	A12	2	3	1	0
02-02-02-02-01-01-13.mp4	VO	Song	Calm	Strong	Kids	R1	A13	1	1	1	1
02-02-02-02-01-01-14.mp4	VO	Song	Calm	Strong	Kids	R1	A14	2	3	1	0
02-02-02-02-01-01-15.mp4	VO	Song	Calm	Strong	Kids	R1	A15	2	2	1	1
02-02-02-02-01-01-16.mp4	VO	Song	Calm	Strong	Kids	R1	A16	1	1	1	1
02-02-02-02-01-01-17.mp4	VO	Song	Calm	Strong	Kids	R1	A17	1	4	1	0
02-02-02-02-01-01-19.mp4	VO	Song	Calm	Strong	Kids	R1	A19	3	3	0	0
02-02-02-02-01-01-20.mp4	VO	Song	Calm	Strong	Kids	R1	A20	2	1	1	1
02-02-02-02-01-01-21.mp4	VO	Song	Calm	Strong	Kids	R1	A21	3	3	0	0
02-02-02-02-01-01-22.mp4	VO	Song	Calm	Strong	Kids	R1	A22	1	2	1	1
02-02-02-02-01-01-23.mp4	VO	Song	Calm	Strong	Kids	R1	A23	3	3	0	0
02-02-02-02-01-01-24.mp4	VO	Song	Calm	Strong	Kids	R1	A24	3	3	0	0
02-02-02-02-01-02-01.mp4	VO	Song	Calm	Strong	Kids	R2	A1	3	3	0	0
02-02-02-02-01-02-02.mp4	VO	Song	Calm	Strong	Kids	R2	A2	4	4	0	0
02-02-02-02-01-02-03.mp4	VO	Song	Calm	Strong	Kids	R2	A3	4	4	0	0
02-02-02-02-01-02-04.mp4	VO	Song	Calm	Strong	Kids	R2	A4	2	3	1	0
02-02-02-02-01-02-05.mp4	VO	Song	Calm	Strong	Kids	R2	A5	2	2	1	1
02-02-02-02-01-02-06.mp4	VO	Song	Calm	Strong	Kids	R2	A6	4	4	0	0
02-02-02-02-01-02-07.mp4	VO	Song	Calm	Strong	Kids	R2	A7	1	1	1	1
02-02-02-02-01-02-08.mp4	VO	Song	Calm	Strong	Kids	R2	A8	2	2	1	1
02-02-02-02-01-02-09.mp4	VO	Song	Calm	Strong	Kids	R2	A9	2	2	1	1
02-02-02-02-01-02-10.mp4	VO	Song	Calm	Strong	Kids	R2	A10	2	3	1	0
02-02-02-02-01-02-11.mp4	VO	Song	Calm	Strong	Kids	R2	A11	1	1	1	1
02-02-02-02-01-02-12.mp4	VO	Song	Calm	Strong	Kids	R2	A12	3	3	0	0
02-02-02-02-01-02-13.mp4	VO	Song	Calm	Strong	Kids	R2	A13	9	2	0	1
02-02-02-02-01-02-14.mp4	VO	Song	Calm	Strong	Kids	R2	A14	3	2	0	1
02-02-02-02-01-02-15.mp4	VO	Song	Calm	Strong	Kids	R2	A15	2	1	1	1
02-02-02-02-01-02-16.mp4	VO	Song	Calm	Strong	Kids	R2	A16	2	2	1	1
02-02-02-02-01-02-17.mp4	VO	Song	Calm	Strong	Kids	R2	A17	3	2	0	1
02-02-02-02-01-02-19.mp4	VO	Song	Calm	Strong	Kids	R2	A19	3	3	0	0
02-02-02-02-01-02-20.mp4	VO	Song	Calm	Strong	Kids	R2	A20	2	2	1	1
02-02-02-02-01-02-21.mp4	VO	Song	Calm	Strong	Kids	R2	A21	1	1	1	1
02-02-02-02-01-02-22.mp4	VO	Song	Calm	Strong	Kids	R2	A22	2	1	1	1
02-02-02-02-01-02-23.mp4	VO	Song	Calm	Strong	Kids	R2	A23	2	2	1	1
02-02-02-02-01-02-24.mp4	VO	Song	Calm	Strong	Kids	R2	A24	1	1	1	1
02-02-02-02-02-01-01.mp4	VO	Song	Calm	Strong	Dogs	R1	A1	2	3	1	0
02-02-02-02-02-01-02.mp4	VO	Song	Calm	Strong	Dogs	R1	A2	1	4	1	0
02-02-02-02-02-01-03.mp4	VO	Song	Calm	Strong	Dogs	R1	A3	4	4	0	0
02-02-02-02-02-01-04.mp4	VO	Song	Calm	Strong	Dogs	R1	A4	2	2	1	1
02-02-02-02-02-01-05.mp4	VO	Song	Calm	Strong	Dogs	R1	A5	3	3	0	0
02-02-02-02-02-01-06.mp4	VO	Song	Calm	Strong	Dogs	R1	A6	2	2	1	1
02-02-02-02-02-01-07.mp4	VO	Song	Calm	Strong	Dogs	R1	A7	2	4	1	0
02-02-02-02-02-01-08.mp4	VO	Song	Calm	Strong	Dogs	R1	A8	3	3	0	0
02-02-02-02-02-01-09.mp4	VO	Song	Calm	Strong	Dogs	R1	A9	4	4	0	0
02-02-02-02-02-01-10.mp4	VO	Song	Calm	Strong	Dogs	R1	A10	3	3	0	0
02-02-02-02-02-01-11.mp4	VO	Song	Calm	Strong	Dogs	R1	A11	3	1	0	1
02-02-02-02-02-01-12.mp4	VO	Song	Calm	Strong	Dogs	R1	A12	3	3	0	0
02-02-02-02-02-01-13.mp4	VO	Song	Calm	Strong	Dogs	R1	A13	1	1	1	1
02-02-02-02-02-01-14.mp4	VO	Song	Calm	Strong	Dogs	R1	A14	9	9	0	0
02-02-02-02-02-01-15.mp4	VO	Song	Calm	Strong	Dogs	R1	A15	2	2	1	1
02-02-02-02-02-01-16.mp4	VO	Song	Calm	Strong	Dogs	R1	A16	6	2	0	1
02-02-02-02-02-01-17.mp4	VO	Song	Calm	Strong	Dogs	R1	A17	1	1	1	1
02-02-02-02-02-01-19.mp4	VO	Song	Calm	Strong	Dogs	R1	A19	3	3	0	0
02-02-02-02-02-01-20.mp4	VO	Song	Calm	Strong	Dogs	R1	A20	2	2	1	1
02-02-02-02-02-01-21.mp4	VO	Song	Calm	Strong	Dogs	R1	A21	1	2	1	1
02-02-02-02-02-01-22.mp4	VO	Song	Calm	Strong	Dogs	R1	A22	1	2	1	1
02-02-02-02-02-01-23.mp4	VO	Song	Calm	Strong	Dogs	R1	A23	2	2	1	1
02-02-02-02-02-01-24.mp4	VO	Song	Calm	Strong	Dogs	R1	A24	3	3	0	0
02-02-02-02-02-02-01.mp4	VO	Song	Calm	Strong	Dogs	R2	A1	2	2	1	1
02-02-02-02-02-02-02.mp4	VO	Song	Calm	Strong	Dogs	R2	A2	1	1	1	1
02-02-02-02-02-02-03.mp4	VO	Song	Calm	Strong	Dogs	R2	A3	4	4	0	0
02-02-02-02-02-02-04.mp4	VO	Song	Calm	Strong	Dogs	R2	A4	3	3	0	0
02-02-02-02-02-02-05.mp4	VO	Song	Calm	Strong	Dogs	R2	A5	2	3	1	0
02-02-02-02-02-02-06.mp4	VO	Song	Calm	Strong	Dogs	R2	A6	1	1	1	1
02-02-02-02-02-02-07.mp4	VO	Song	Calm	Strong	Dogs	R2	A7	2	2	1	1
02-02-02-02-02-02-08.mp4	VO	Song	Calm	Strong	Dogs	R2	A8	2	2	1	1
02-02-02-02-02-02-09.mp4	VO	Song	Calm	Strong	Dogs	R2	A9	4	4	0	0
02-02-02-02-02-02-10.mp4	VO	Song	Calm	Strong	Dogs	R2	A10	2	2	1	1
02-02-02-02-02-02-11.mp4	VO	Song	Calm	Strong	Dogs	R2	A11	1	1	1	1
02-02-02-02-02-02-12.mp4	VO	Song	Calm	Strong	Dogs	R2	A12	3	3	0	0
02-02-02-02-02-02-13.mp4	VO	Song	Calm	Strong	Dogs	R2	A13	1	9	1	0
02-02-02-02-02-02-14.mp4	VO	Song	Calm	Strong	Dogs	R2	A14	3	2	0	1
02-02-02-02-02-02-15.mp4	VO	Song	Calm	Strong	Dogs	R2	A15	2	2	1	1
02-02-02-02-02-02-16.mp4	VO	Song	Calm	Strong	Dogs	R2	A16	3	3	0	0
02-02-02-02-02-02-17.mp4	VO	Song	Calm	Strong	Dogs	R2	A17	1	2	1	1
02-02-02-02-02-02-19.mp4	VO	Song	Calm	Strong	Dogs	R2	A19	3	3	0	0
02-02-02-02-02-02-20.mp4	VO	Song	Calm	Strong	Dogs	R2	A20	3	1	0	1
02-02-02-02-02-02-21.mp4	VO	Song	Calm	Strong	Dogs	R2	A21	1	1	1	1
02-02-02-02-02-02-22.mp4	VO	Song	Calm	Strong	Dogs	R2	A22	3	1	0	1
02-02-02-02-02-02-23.mp4	VO	Song	Calm	Strong	Dogs	R2	A23	1	1	1	1
02-02-02-02-02-02-24.mp4	VO	Song	Calm	Strong	Dogs	R2	A24	2	2	1	1
02-02-03-01-01-01-01.mp4	VO	Song	Happy	Normal	Kids	R1	A1	3	3	1	1
02-02-03-01-01-01-02.mp4	VO	Song	Happy	Normal	Kids	R1	A2	3	3	1	1
02-02-03-01-01-01-03.mp4	VO	Song	Happy	Normal	Kids	R1	A3	9	3	0	1
02-02-03-01-01-01-04.mp4	VO	Song	Happy	Normal	Kids	R1	A4	3	3	1	1
02-02-03-01-01-01-05.mp4	VO	Song	Happy	Normal	Kids	R1	A5	3	3	1	1
02-02-03-01-01-01-06.mp4	VO	Song	Happy	Normal	Kids	R1	A6	1	1	0	0
02-02-03-01-01-01-07.mp4	VO	Song	Happy	Normal	Kids	R1	A7	3	3	1	1
02-02-03-01-01-01-08.mp4	VO	Song	Happy	Normal	Kids	R1	A8	3	3	1	1
02-02-03-01-01-01-09.mp4	VO	Song	Happy	Normal	Kids	R1	A9	3	3	1	1
02-02-03-01-01-01-10.mp4	VO	Song	Happy	Normal	Kids	R1	A10	3	3	1	1
02-02-03-01-01-01-11.mp4	VO	Song	Happy	Normal	Kids	R1	A11	3	3	1	1
02-02-03-01-01-01-12.mp4	VO	Song	Happy	Normal	Kids	R1	A12	3	3	1	1
02-02-03-01-01-01-13.mp4	VO	Song	Happy	Normal	Kids	R1	A13	3	3	1	1
02-02-03-01-01-01-14.mp4	VO	Song	Happy	Normal	Kids	R1	A14	3	3	1	1
02-02-03-01-01-01-15.mp4	VO	Song	Happy	Normal	Kids	R1	A15	3	3	1	1
02-02-03-01-01-01-16.mp4	VO	Song	Happy	Normal	Kids	R1	A16	3	3	1	1
02-02-03-01-01-01-17.mp4	VO	Song	Happy	Normal	Kids	R1	A17	3	3	1	1
02-02-03-01-01-01-19.mp4	VO	Song	Happy	Normal	Kids	R1	A19	3	3	1	1
02-02-03-01-01-01-20.mp4	VO	Song	Happy	Normal	Kids	R1	A20	3	3	1	1
02-02-03-01-01-01-21.mp4	VO	Song	Happy	Normal	Kids	R1	A21	3	3	1	1
02-02-03-01-01-01-22.mp4	VO	Song	Happy	Normal	Kids	R1	A22	1	2	0	0
02-02-03-01-01-01-23.mp4	VO	Song	Happy	Normal	Kids	R1	A23	3	3	1	1
02-02-03-01-01-01-24.mp4	VO	Song	Happy	Normal	Kids	R1	A24	3	3	1	1
02-02-03-01-01-02-01.mp4	VO	Song	Happy	Normal	Kids	R2	A1	3	2	1	0
02-02-03-01-01-02-02.mp4	VO	Song	Happy	Normal	Kids	R2	A2	3	3	1	1
02-02-03-01-01-02-03.mp4	VO	Song	Happy	Normal	Kids	R2	A3	3	3	1	1
02-02-03-01-01-02-04.mp4	VO	Song	Happy	Normal	Kids	R2	A4	3	3	1	1
02-02-03-01-01-02-05.mp4	VO	Song	Happy	Normal	Kids	R2	A5	3	3	1	1
02-02-03-01-01-02-06.mp4	VO	Song	Happy	Normal	Kids	R2	A6	3	3	1	1
02-02-03-01-01-02-07.mp4	VO	Song	Happy	Normal	Kids	R2	A7	3	3	1	1
02-02-03-01-01-02-08.mp4	VO	Song	Happy	Normal	Kids	R2	A8	3	3	1	1
02-02-03-01-01-02-09.mp4	VO	Song	Happy	Normal	Kids	R2	A9	3	3	1	1
02-02-03-01-01-02-10.mp4	VO	Song	Happy	Normal	Kids	R2	A10	3	3	1	1
02-02-03-01-01-02-11.mp4	VO	Song	Happy	Normal	Kids	R2	A11	3	3	1	1
02-02-03-01-01-02-12.mp4	VO	Song	Happy	Normal	Kids	R2	A12	3	3	1	1
02-02-03-01-01-02-13.mp4	VO	Song	Happy	Normal	Kids	R2	A13	3	3	1	1
02-02-03-01-01-02-14.mp4	VO	Song	Happy	Normal	Kids	R2	A14	3	3	1	1
02-02-03-01-01-02-15.mp4	VO	Song	Happy	Normal	Kids	R2	A15	3	3	1	1
02-02-03-01-01-02-16.mp4	VO	Song	Happy	Normal	Kids	R2	A16	3	3	1	1
02-02-03-01-01-02-17.mp4	VO	Song	Happy	Normal	Kids	R2	A17	3	3	1	1
02-02-03-01-01-02-19.mp4	VO	Song	Happy	Normal	Kids	R2	A19	3	3	1	1
02-02-03-01-01-02-20.mp4	VO	Song	Happy	Normal	Kids	R2	A20	3	3	1	1
02-02-03-01-01-02-21.mp4	VO	Song	Happy	Normal	Kids	R2	A21	3	3	1	1
02-02-03-01-01-02-22.mp4	VO	Song	Happy	Normal	Kids	R2	A22	3	3	1	1
02-02-03-01-01-02-23.mp4	VO	Song	Happy	Normal	Kids	R2	A23	3	3	1	1
02-02-03-01-01-02-24.mp4	VO	Song	Happy	Normal	Kids	R2	A24	3	3	1	1
02-02-03-01-02-01-01.mp4	VO	Song	Happy	Normal	Dogs	R1	A1	3	3	1	1
02-02-03-01-02-01-02.mp4	VO	Song	Happy	Normal	Dogs	R1	A2	3	3	1	1
02-02-03-01-02-01-03.mp4	VO	Song	Happy	Normal	Dogs	R1	A3	3	3	1	1
02-02-03-01-02-01-04.mp4	VO	Song	Happy	Normal	Dogs	R1	A4	3	3	1	1
02-02-03-01-02-01-05.mp4	VO	Song	Happy	Normal	Dogs	R1	A5	9	3	0	1
02-02-03-01-02-01-06.mp4	VO	Song	Happy	Normal	Dogs	R1	A6	3	3	1	1
02-02-03-01-02-01-07.mp4	VO	Song	Happy	Normal	Dogs	R1	A7	1	1	0	0
02-02-03-01-02-01-08.mp4	VO	Song	Happy	Normal	Dogs	R1	A8	3	3	1	1
02-02-03-01-02-01-09.mp4	VO	Song	Happy	Normal	Dogs	R1	A9	3	3	1	1
02-02-03-01-02-01-10.mp4	VO	Song	Happy	Normal	Dogs	R1	A10	3	3	1	1
02-02-03-01-02-01-11.mp4	VO	Song	Happy	Normal	Dogs	R1	A11	3	3	1	1
02-02-03-01-02-01-12.mp4	VO	Song	Happy	Normal	Dogs	R1	A12	3	3	1	1
02-02-03-01-02-01-13.mp4	VO	Song	Happy	Normal	Dogs	R1	A13	3	3	1	1
02-02-03-01-02-01-14.mp4	VO	Song	Happy	Normal	Dogs	R1	A14	3	3	1	1
02-02-03-01-02-01-15.mp4	VO	Song	Happy	Normal	Dogs	R1	A15	3	3	1	1
02-02-03-01-02-01-16.mp4	VO	Song	Happy	Normal	Dogs	R1	A16	3	3	1	1
02-02-03-01-02-01-17.mp4	VO	Song	Happy	Normal	Dogs	R1	A17	3	2	1	0
02-02-03-01-02-01-19.mp4	VO	Song	Happy	Normal	Dogs	R1	A19	3	3	1	1
02-02-03-01-02-01-20.mp4	VO	Song	Happy	Normal	Dogs	R1	A20	3	3	1	1
02-02-03-01-02-01-21.mp4	VO	Song	Happy	Normal	Dogs	R1	A21	3	3	1	1
02-02-03-01-02-01-22.mp4	VO	Song	Happy	Normal	Dogs	R1	A22	3	3	1	1
02-02-03-01-02-01-23.mp4	VO	Song	Happy	Normal	Dogs	R1	A23	3	9	1	0
02-02-03-01-02-01-24.mp4	VO	Song	Happy	Normal	Dogs	R1	A24	9	9	0	0
02-02-03-01-02-02-01.mp4	VO	Song	Happy	Normal	Dogs	R2	A1	3	3	1	1
02-02-03-01-02-02-02.mp4	VO	Song	Happy	Normal	Dogs	R2	A2	3	3	1	1
02-02-03-01-02-02-03.mp4	VO	Song	Happy	Normal	Dogs	R2	A3	3	3	1	1
02-02-03-01-02-02-04.mp4	VO	Song	Happy	Normal	Dogs	R2	A4	3	3	1	1
02-02-03-01-02-02-05.mp4	VO	Song	Happy	Normal	Dogs	R2	A5	3	3	1	1
02-02-03-01-02-02-06.mp4	VO	Song	Happy	Normal	Dogs	R2	A6	1	1	0	0
02-02-03-01-02-02-07.mp4	VO	Song	Happy	Normal	Dogs	R2	A7	3	3	1	1
02-02-03-01-02-02-08.mp4	VO	Song	Happy	Normal	Dogs	R2	A8	3	3	1	1
02-02-03-01-02-02-09.mp4	VO	Song	Happy	Normal	Dogs	R2	A9	3	3	1	1
02-02-03-01-02-02-10.mp4	VO	Song	Happy	Normal	Dogs	R2	A10	3	3	1	1
02-02-03-01-02-02-11.mp4	VO	Song	Happy	Normal	Dogs	R2	A11	3	2	1	0
02-02-03-01-02-02-12.mp4	VO	Song	Happy	Normal	Dogs	R2	A12	3	3	1	1
02-02-03-01-02-02-13.mp4	VO	Song	Happy	Normal	Dogs	R2	A13	3	3	1	1
02-02-03-01-02-02-14.mp4	VO	Song	Happy	Normal	Dogs	R2	A14	3	3	1	1
02-02-03-01-02-02-15.mp4	VO	Song	Happy	Normal	Dogs	R2	A15	3	2	1	0
02-02-03-01-02-02-16.mp4	VO	Song	Happy	Normal	Dogs	R2	A16	3	3	1	1
02-02-03-01-02-02-17.mp4	VO	Song	Happy	Normal	Dogs	R2	A17	2	2	0	0
02-02-03-01-02-02-19.mp4	VO	Song	Happy	Normal	Dogs	R2	A19	2	2	0	0
02-02-03-01-02-02-20.mp4	VO	Song	Happy	Normal	Dogs	R2	A20	3	3	1	1
02-02-03-01-02-02-21.mp4	VO	Song	Happy	Normal	Dogs	R2	A21	3	3	1	1
02-02-03-01-02-02-22.mp4	VO	Song	Happy	Normal	Dogs	R2	A22	3	3	1	1
02-02-03-01-02-02-23.mp4	VO	Song	Happy	Normal	Dogs	R2	A23	3	3	1	1
02-02-03-01-02-02-24.mp4	VO	Song	Happy	Normal	Dogs	R2	A24	3	3	1	1
02-02-03-02-01-01-01.mp4	VO	Song	Happy	Strong	Kids	R1	A1	3	3	1	1
02-02-03-02-01-01-02.mp4	VO	Song	Happy	Strong	Kids	R1	A2	3	3	1	1
02-02-03-02-01-01-03.mp4	VO	Song	Happy	Strong	Kids	R1	A3	3	3	1	1
02-02-03-02-01-01-04.mp4	VO	Song	Happy	Strong	Kids	R1	A4	3	3	1	1
02-02-03-02-01-01-05.mp4	VO	Song	Happy	Strong	Kids	R1	A5	3	3	1	1
02-02-03-02-01-01-06.mp4	VO	Song	Happy	Strong	Kids	R1	A6	3	3	1	1
02-02-03-02-01-01-07.mp4	VO	Song	Happy	Strong	Kids	R1	A7	3	3	1	1
02-02-03-02-01-01-08.mp4	VO	Song	Happy	Strong	Kids	R1	A8	3	3	1	1
02-02-03-02-01-01-09.mp4	VO	Song	Happy	Strong	Kids	R1	A9	3	3	1	1
02-02-03-02-01-01-10.mp4	VO	Song	Happy	Strong	Kids	R1	A10	3	3	1	1
02-02-03-02-01-01-11.mp4	VO	Song	Happy	Strong	Kids	R1	A11	3	3	1	1
02-02-03-02-01-01-12.mp4	VO	Song	Happy	Strong	Kids	R1	A12	3	3	1	1
02-02-03-02-01-01-13.mp4	VO	Song	Happy	Strong	Kids	R1	A13	3	3	1	1
02-02-03-02-01-01-14.mp4	VO	Song	Happy	Strong	Kids	R1	A14	3	3	1	1
02-02-03-02-01-01-15.mp4	VO	Song	Happy	Strong	Kids	R1	A15	3	3	1	1
02-02-03-02-01-01-16.mp4	VO	Song	Happy	Strong	Kids	R1	A16	3	3	1	1
02-02-03-02-01-01-17.mp4	VO	Song	Happy	Strong	Kids	R1	A17	3	3	1	1
02-02-03-02-01-01-19.mp4	VO	Song	Happy	Strong	Kids	R1	A19	3	3	1	1
02-02-03-02-01-01-20.mp4	VO	Song	Happy	Strong	Kids	R1	A20	3	3	1	1
02-02-03-02-01-01-21.mp4	VO	Song	Happy	Strong	Kids	R1	A21	3	3	1	1
02-02-03-02-01-01-22.mp4	VO	Song	Happy	Strong	Kids	R1	A22	3	3	1	1
02-02-03-02-01-01-23.mp4	VO	Song	Happy	Strong	Kids	R1	A23	3	3	1	1
02-02-03-02-01-01-24.mp4	VO	Song	Happy	Strong	Kids	R1	A24	3	3	1	1
02-02-03-02-01-02-01.mp4	VO	Song	Happy	Strong	Kids	R2	A1	3	3	1	1
02-02-03-02-01-02-02.mp4	VO	Song	Happy	Strong	Kids	R2	A2	3	3	1	1
02-02-03-02-01-02-03.mp4	VO	Song	Happy	Strong	Kids	R2	A3	4	4	0	0
02-02-03-02-01-02-04.mp4	VO	Song	Happy	Strong	Kids	R2	A4	3	3	1	1
02-02-03-02-01-02-05.mp4	VO	Song	Happy	Strong	Kids	R2	A5	6	3	0	1
02-02-03-02-01-02-06.mp4	VO	Song	Happy	Strong	Kids	R2	A6	3	3	1	1
02-02-03-02-01-02-07.mp4	VO	Song	Happy	Strong	Kids	R2	A7	3	3	1	1
02-02-03-02-01-02-08.mp4	VO	Song	Happy	Strong	Kids	R2	A8	3	3	1	1
02-02-03-02-01-02-09.mp4	VO	Song	Happy	Strong	Kids	R2	A9	3	3	1	1
02-02-03-02-01-02-10.mp4	VO	Song	Happy	Strong	Kids	R2	A10	3	3	1	1
02-02-03-02-01-02-11.mp4	VO	Song	Happy	Strong	Kids	R2	A11	3	3	1	1
02-02-03-02-01-02-12.mp4	VO	Song	Happy	Strong	Kids	R2	A12	3	3	1	1
02-02-03-02-01-02-13.mp4	VO	Song	Happy	Strong	Kids	R2	A13	3	3	1	1
02-02-03-02-01-02-14.mp4	VO	Song	Happy	Strong	Kids	R2	A14	3	3	1	1
02-02-03-02-01-02-15.mp4	VO	Song	Happy	Strong	Kids	R2	A15	3	3	1	1
02-02-03-02-01-02-16.mp4	VO	Song	Happy	Strong	Kids	R2	A16	3	3	1	1
02-02-03-02-01-02-17.mp4	VO	Song	Happy	Strong	Kids	R2	A17	3	3	1	1
02-02-03-02-01-02-19.mp4	VO	Song	Happy	Strong	Kids	R2	A19	3	3	1	1
02-02-03-02-01-02-20.mp4	VO	Song	Happy	Strong	Kids	R2	A20	9	9	0	0
02-02-03-02-01-02-21.mp4	VO	Song	Happy	Strong	Kids	R2	A21	3	3	1	1
02-02-03-02-01-02-22.mp4	VO	Song	Happy	Strong	Kids	R2	A22	3	3	1	1
02-02-03-02-01-02-23.mp4	VO	Song	Happy	Strong	Kids	R2	A23	3	3	1	1
02-02-03-02-01-02-24.mp4	VO	Song	Happy	Strong	Kids	R2	A24	3	3	1	1
02-02-03-02-02-01-01.mp4	VO	Song	Happy	Strong	Dogs	R1	A1	3	3	1	1
02-02-03-02-02-01-02.mp4	VO	Song	Happy	Strong	Dogs	R1	A2	3	3	1	1
02-02-03-02-02-01-03.mp4	VO	Song	Happy	Strong	Dogs	R1	A3	3	3	1	1
02-02-03-02-02-01-04.mp4	VO	Song	Happy	Strong	Dogs	R1	A4	3	3	1	1
02-02-03-02-02-01-05.mp4	VO	Song	Happy	Strong	Dogs	R1	A5	3	3	1	1
02-02-03-02-02-01-06.mp4	VO	Song	Happy	Strong	Dogs	R1	A6	3	3	1	1
02-02-03-02-02-01-07.mp4	VO	Song	Happy	Strong	Dogs	R1	A7	3	3	1	1
02-02-03-02-02-01-08.mp4	VO	Song	Happy	Strong	Dogs	R1	A8	3	3	1	1
02-02-03-02-02-01-09.mp4	VO	Song	Happy	Strong	Dogs	R1	A9	3	9	1	0
02-02-03-02-02-01-10.mp4	VO	Song	Happy	Strong	Dogs	R1	A10	3	3	1	1
02-02-03-02-02-01-11.mp4	VO	Song	Happy	Strong	Dogs	R1	A11	3	3	1	1
02-02-03-02-02-01-12.mp4	VO	Song	Happy	Strong	Dogs	R1	A12	3	3	1	1
02-02-03-02-02-01-13.mp4	VO	Song	Happy	Strong	Dogs	R1	A13	3	3	1	1
02-02-03-02-02-01-14.mp4	VO	Song	Happy	Strong	Dogs	R1	A14	2	2	0	0
02-02-03-02-02-01-15.mp4	VO	Song	Happy	Strong	Dogs	R1	A15	9	3	0	1
02-02-03-02-02-01-16.mp4	VO	Song	Happy	Strong	Dogs	R1	A16	5	3	0	1
02-02-03-02-02-01-17.mp4	VO	Song	Happy	Strong	Dogs	R1	A17	3	3	1	1
02-02-03-02-02-01-19.mp4	VO	Song	Happy	Strong	Dogs	R1	A19	3	3	1	1
02-02-03-02-02-01-20.mp4	VO	Song	Happy	Strong	Dogs	R1	A20	3	3	1	1
02-02-03-02-02-01-21.mp4	VO	Song	Happy	Strong	Dogs	R1	A21	3	1	1	0
02-02-03-02-02-01-22.mp4	VO	Song	Happy	Strong	Dogs	R1	A22	3	3	1	1
02-02-03-02-02-01-23.mp4	VO	Song	Happy	Strong	Dogs	R1	A23	3	3	1	1
02-02-03-02-02-01-24.mp4	VO	Song	Happy	Strong	Dogs	R1	A24	3	3	1	1
02-02-03-02-02-02-01.mp4	VO	Song	Happy	Strong	Dogs	R2	A1	3	3	1	1
02-02-03-02-02-02-02.mp4	VO	Song	Happy	Strong	Dogs	R2	A2	3	3	1	1
02-02-03-02-02-02-03.mp4	VO	Song	Happy	Strong	Dogs	R2	A3	3	4	1	0
02-02-03-02-02-02-04.mp4	VO	Song	Happy	Strong	Dogs	R2	A4	3	3	1	1
02-02-03-02-02-02-05.mp4	VO	Song	Happy	Strong	Dogs	R2	A5	3	3	1	1
02-02-03-02-02-02-06.mp4	VO	Song	Happy	Strong	Dogs	R2	A6	3	3	1	1
02-02-03-02-02-02-07.mp4	VO	Song	Happy	Strong	Dogs	R2	A7	3	3	1	1
02-02-03-02-02-02-08.mp4	VO	Song	Happy	Strong	Dogs	R2	A8	3	3	1	1
02-02-03-02-02-02-09.mp4	VO	Song	Happy	Strong	Dogs	R2	A9	3	3	1	1
02-02-03-02-02-02-10.mp4	VO	Song	Happy	Strong	Dogs	R2	A10	3	3	1	1
02-02-03-02-02-02-11.mp4	VO	Song	Happy	Strong	Dogs	R2	A11	3	3	1	1
02-02-03-02-02-02-12.mp4	VO	Song	Happy	Strong	Dogs	R2	A12	3	3	1	1
02-02-03-02-02-02-13.mp4	VO	Song	Happy	Strong	Dogs	R2	A13	3	3	1	1
02-02-03-02-02-02-14.mp4	VO	Song	Happy	Strong	Dogs	R2	A14	3	3	1	1
02-02-03-02-02-02-15.mp4	VO	Song	Happy	Strong	Dogs	R2	A15	3	3	1	1
02-02-03-02-02-02-16.mp4	VO	Song	Happy	Strong	Dogs	R2	A16	3	3	1	1
02-02-03-02-02-02-17.mp4	VO	Song	Happy	Strong	Dogs	R2	A17	3	3	1	1
02-02-03-02-02-02-19.mp4	VO	Song	Happy	Strong	Dogs	R2	A19	3	3	1	1
02-02-03-02-02-02-20.mp4	VO	Song	Happy	Strong	Dogs	R2	A20	3	3	1	1
02-02-03-02-02-02-21.mp4	VO	Song	Happy	Strong	Dogs	R2	A21	3	3	1	1
02-02-03-02-02-02-22.mp4	VO	Song	Happy	Strong	Dogs	R2	A22	3	9	1	0
02-02-03-02-02-02-23.mp4	VO	Song	Happy	Strong	Dogs	R2	A23	3	3	1	1
02-02-03-02-02-02-24.mp4	VO	Song	Happy	Strong	Dogs	R2	A24	3	3	1	1
02-02-04-01-01-01-01.mp4	VO	Song	Sad	Normal	Kids	R1	A1	4	4	1	1
02-02-04-01-01-01-02.mp4	VO	Song	Sad	Normal	Kids	R1	A2	4	6	1	0
02-02-04-01-01-01-03.mp4	VO	Song	Sad	Normal	Kids	R1	A3	4	4	1	1
02-02-04-01-01-01-04.mp4	VO	Song	Sad	Normal	Kids	R1	A4	2	4	0	1
02-02-04-01-01-01-05.mp4	VO	Song	Sad	Normal	Kids	R1	A5	4	4	1	1
02-02-04-01-01-01-06.mp4	VO	Song	Sad	Normal	Kids	R1	A6	4	4	1	1
02-02-04-01-01-01-07.mp4	VO	Song	Sad	Normal	Kids	R1	A7	4	4	1	1
02-02-04-01-01-01-08.mp4	VO	Song	Sad	Normal	Kids	R1	A8	4	4	1	1
02-02-04-01-01-01-09.mp4	VO	Song	Sad	Normal	Kids	R1	A9	4	4	1	1
02-02-04-01-01-01-10.mp4	VO	Song	Sad	Normal	Kids	R1	A10	4	4	1	1
02-02-04-01-01-01-11.mp4	VO	Song	Sad	Normal	Kids	R1	A11	4	2	1	0
02-02-04-01-01-01-12.mp4	VO	Song	Sad	Normal	Kids	R1	A12	4	6	1	0
02-02-04-01-01-01-13.mp4	VO	Song	Sad	Normal	Kids	R1	A13	5	5	0	0
02-02-04-01-01-01-14.mp4	VO	Song	Sad	Normal	Kids	R1	A14	5	5	0	0
02-02-04-01-01-01-15.mp4	VO	Song	Sad	Normal	Kids	R1	A15	4	1	1	0
02-02-04-01-01-01-16.mp4	VO	Song	Sad	Normal	Kids	R1	A16	4	4	1	1
02-02-04-01-01-01-17.mp4	VO	Song	Sad	Normal	Kids	R1	A17	4	4	1	1
02-02-04-01-01-01-19.mp4	VO	Song	Sad	Normal	Kids	R1	A19	4	4	1	1
02-02-04-01-01-01-20.mp4	VO	Song	Sad	Normal	Kids	R1	A20	9	4	0	1
02-02-04-01-01-01-21.mp4	VO	Song	Sad	Normal	Kids	R1	A21	4	4	1	1
02-02-04-01-01-01-22.mp4	VO	Song	Sad	Normal	Kids	R1	A22	4	4	1	1
02-02-04-01-01-01-23.mp4	VO	Song	Sad	Normal	Kids	R1	A23	1	1	0	0
02-02-04-01-01-01-24.mp4	VO	Song	Sad	Normal	Kids	R1	A24	4	4	1	1
02-02-04-01-01-02-01.mp4	VO	Song	Sad	Normal	Kids	R2	A1	4	4	1	1
02-02-04-01-01-02-02.mp4	VO	Song	Sad	Normal	Kids	R2	A2	4	4	1	1
02-02-04-01-01-02-03.mp4	VO	Song	Sad	Normal	Kids	R2	A3	4	4	1	1
02-02-04-01-01-02-04.mp4	VO	Song	Sad	Normal	Kids	R2	A4	4	4	1	1
02-02-04-01-01-02-05.mp4	VO	Song	Sad	Normal	Kids	R2	A5	4	4	1	1
02-02-04-01-01-02-06.mp4	VO	Song	Sad	Normal	Kids	R2	A6	4	4	1	1
02-02-04-01-01-02-07.mp4	VO	Song	Sad	Normal	Kids	R2	A7	4	4	1	1
02-02-04-01-01-02-08.mp4	VO	Song	Sad	Normal	Kids	R2	A8	4	4	1	1
02-02-04-01-01-02-09.mp4	VO	Song	Sad	Normal	Kids	R2	A9	4	4	1	1
02-02-04-01-01-02-10.mp4	VO	Song	Sad	Normal	Kids	R2	A10	4	4	1	1
02-02-04-01-01-02-11.mp4	VO	Song	Sad	Normal	Kids	R2	A11	4	4	1	1
02-02-04-01-01-02-12.mp4	VO	Song	Sad	Normal	Kids	R2	A12	4	4	1	1
02-02-04-01-01-02-13.mp4	VO	Song	Sad	Normal	Kids	R2	A13	9	4	0	1
02-02-04-01-01-02-14.mp4	VO	Song	Sad	Normal	Kids	R2	A14	2	1	0	0
02-02-04-01-01-02-15.mp4	VO	Song	Sad	Normal	Kids	R2	A15	4	6	1	0
02-02-04-01-01-02-16.mp4	VO	Song	Sad	Normal	Kids	R2	A16	3	3	0	0
02-02-04-01-01-02-17.mp4	VO	Song	Sad	Normal	Kids	R2	A17	4	4	1	1
02-02-04-01-01-02-19.mp4	VO	Song	Sad	Normal	Kids	R2	A19	4	4	1	1
02-02-04-01-01-02-20.mp4	VO	Song	Sad	Normal	Kids	R2	A20	4	4	1	1
02-02-04-01-01-02-21.mp4	VO	Song	Sad	Normal	Kids	R2	A21	9	4	0	1
02-02-04-01-01-02-22.mp4	VO	Song	Sad	Normal	Kids	R2	A22	4	4	1	1
02-02-04-01-01-02-23.mp4	VO	Song	Sad	Normal	Kids	R2	A23	2	1	0	0
02-02-04-01-01-02-24.mp4	VO	Song	Sad	Normal	Kids	R2	A24	4	4	1	1
02-02-04-01-02-01-01.mp4	VO	Song	Sad	Normal	Dogs	R1	A1	4	4	1	1
02-02-04-01-02-01-02.mp4	VO	Song	Sad	Normal	Dogs	R1	A2	6	4	0	1
02-02-04-01-02-01-03.mp4	VO	Song	Sad	Normal	Dogs	R1	A3	4	4	1	1
02-02-04-01-02-01-04.mp4	VO	Song	Sad	Normal	Dogs	R1	A4	4	4	1	1
02-02-04-01-02-01-05.mp4	VO	Song	Sad	Normal	Dogs	R1	A5	4	1	1	0
02-02-04-01-02-01-06.mp4	VO	Song	Sad	Normal	Dogs	R1	A6	4	4	1	1
02-02-04-01-02-01-07.mp4	VO	Song	Sad	Normal	Dogs	R1	A7	4	4	1	1
02-02-04-01-02-01-08.mp4	VO	Song	Sad	Normal	Dogs	R1	A8	4	4	1	1
02-02-04-01-02-01-09.mp4	VO	Song	Sad	Normal	Dogs	R1	A9	4	4	1	1
02-02-04-01-02-01-10.mp4	VO	Song	Sad	Normal	Dogs	R1	A10	4	4	1	1
02-02-04-01-02-01-11.mp4	VO	Song	Sad	Normal	Dogs	R1	A11	4	4	1	1
02-02-04-01-02-01-12.mp4	VO	Song	Sad	Normal	Dogs	R1	A12	3	4	0	1
02-02-04-01-02-01-13.mp4	VO	Song	Sad	Normal	Dogs	R1	A13	1	1	0	0
02-02-04-01-02-01-14.mp4	VO	Song	Sad	Normal	Dogs	R1	A14	4	4	1	1
02-02-04-01-02-01-15.mp4	VO	Song	Sad	Normal	Dogs	R1	A15	4	4	1	1
02-02-04-01-02-01-16.mp4	VO	Song	Sad	Normal	Dogs	R1	A16	4	2	1	0
02-02-04-01-02-01-17.mp4	VO	Song	Sad	Normal	Dogs	R1	A17	4	4	1	1
02-02-04-01-02-01-19.mp4	VO	Song	Sad	Normal	Dogs	R1	A19	4	4	1	1
02-02-04-01-02-01-20.mp4	VO	Song	Sad	Normal	Dogs	R1	A20	4	4	1	1
02-02-04-01-02-01-21.mp4	VO	Song	Sad	Normal	Dogs	R1	A21	4	4	1	1
02-02-04-01-02-01-22.mp4	VO	Song	Sad	Normal	Dogs	R1	A22	4	4	1	1
02-02-04-01-02-01-23.mp4	VO	Song	Sad	Normal	Dogs	R1	A23	2	2	0	0
02-02-04-01-02-01-24.mp4	VO	Song	Sad	Normal	Dogs	R1	A24	2	4	0	1
02-02-04-01-02-02-01.mp4	VO	Song	Sad	Normal	Dogs	R2	A1	4	4	1	1
02-02-04-01-02-02-02.mp4	VO	Song	Sad	Normal	Dogs	R2	A2	4	4	1	1
02-02-04-01-02-02-03.mp4	VO	Song	Sad	Normal	Dogs	R2	A3	4	4	1	1
02-02-04-01-02-02-04.mp4	VO	Song	Sad	Normal	Dogs	R2	A4	4	4	1	1
02-02-04-01-02-02-05.mp4	VO	Song	Sad	Normal	Dogs	R2	A5	4	4	1	1
02-02-04-01-02-02-06.mp4	VO	Song	Sad	Normal	Dogs	R2	A6	6	5	0	0
02-02-04-01-02-02-07.mp4	VO	Song	Sad	Normal	Dogs	R2	A7	4	4	1	1
02-02-04-01-02-02-08.mp4	VO	Song	Sad	Normal	Dogs	R2	A8	4	4	1	1
02-02-04-01-02-02-09.mp4	VO	Song	Sad	Normal	Dogs	R2	A9	4	4	1	1
02-02-04-01-02-02-10.mp4	VO	Song	Sad	Normal	Dogs	R2	A10	4	4	1	1
02-02-04-01-02-02-11.mp4	VO	Song	Sad	Normal	Dogs	R2	A11	4	4	1	1
02-02-04-01-02-02-12.mp4	VO	Song	Sad	Normal	Dogs	R2	A12	4	4	1	1
02-02-04-01-02-02-13.mp4	VO	Song	Sad	Normal	Dogs	R2	A13	1	5	0	0
02-02-04-01-02-02-14.mp4	VO	Song	Sad	Normal	Dogs	R2	A14	6	4	0	1
02-02-04-01-02-02-15.mp4	VO	Song	Sad	Normal	Dogs	R2	A15	1	1	0	0
02-02-04-01-02-02-16.mp4	VO	Song	Sad	Normal	Dogs	R2	A16	4	4	1	1
02-02-04-01-02-02-17.mp4	VO	Song	Sad	Normal	Dogs	R2	A17	4	4	1	1
02-02-04-01-02-02-19.mp4	VO	Song	Sad	Normal	Dogs	R2	A19	4	4	1	1
02-02-04-01-02-02-20.mp4	VO	Song	Sad	Normal	Dogs	R2	A20	6	6	0	0
02-02-04-01-02-02-21.mp4	VO	Song	Sad	Normal	Dogs	R2	A21	2	4	0	1
02-02-04-01-02-02-22.mp4	VO	Song	Sad	Normal	Dogs	R2	A22	4	4	1	1
02-02-04-01-02-02-23.mp4	VO	Song	Sad	Normal	Dogs	R2	A23	4	2	1	0
02-02-04-01-02-02-24.mp4	VO	Song	Sad	Normal	Dogs	R2	A24	6	4	0	1
02-02-04-02-01-01-01.mp4	VO	Song	Sad	Strong	Kids	R1	A1	4	3	1	0
02-02-04-02-01-01-02.mp4	VO	Song	Sad	Strong	Kids	R1	A2	4	4	1	1
02-02-04-02-01-01-03.mp4	VO	Song	Sad	Strong	Kids	R1	A3	4	4	1	1
02-02-04-02-01-01-04.mp4	VO	Song	Sad	Strong	Kids	R1	A4	4	4	1	1
02-02-04-02-01-01-05.mp4	VO	Song	Sad	Strong	Kids	R1	A5	4	4	1	1
02-02-04-02-01-01-06.mp4	VO	Song	Sad	Strong	Kids	R1	A6	4	4	1	1
02-02-04-02-01-01-07.mp4	VO	Song	Sad	Strong	Kids	R1	A7	4	4	1	1
02-02-04-02-01-01-08.mp4	VO	Song	Sad	Strong	Kids	R1	A8	4	4	1	1
02-02-04-02-01-01-09.mp4	VO	Song	Sad	Strong	Kids	R1	A9	4	4	1	1
02-02-04-02-01-01-10.mp4	VO	Song	Sad	Strong	Kids	R1	A10	4	4	1	1
02-02-04-02-01-01-11.mp4	VO	Song	Sad	Strong	Kids	R1	A11	4	4	1	1
02-02-04-02-01-01-12.mp4	VO	Song	Sad	Strong	Kids	R1	A12	4	4	1	1
02-02-04-02-01-01-13.mp4	VO	Song	Sad	Strong	Kids	R1	A13	5	5	0	0
02-02-04-02-01-01-14.mp4	VO	Song	Sad	Strong	Kids	R1	A14	4	4	1	1
02-02-04-02-01-01-15.mp4	VO	Song	Sad	Strong	Kids	R1	A15	4	4	1	1
02-02-04-02-01-01-16.mp4	VO	Song	Sad	Strong	Kids	R1	A16	4	4	1	1
02-02-04-02-01-01-17.mp4	VO	Song	Sad	Strong	Kids	R1	A17	4	4	1	1
02-02-04-02-01-01-19.mp4	VO	Song	Sad	Strong	Kids	R1	A19	4	4	1	1
02-02-04-02-01-01-20.mp4	VO	Song	Sad	Strong	Kids	R1	A20	4	4	1	1
02-02-04-02-01-01-21.mp4	VO	Song	Sad	Strong	Kids	R1	A21	4	4	1	1
02-02-04-02-01-01-22.mp4	VO	Song	Sad	Strong	Kids	R1	A22	4	4	1	1
02-02-04-02-01-01-23.mp4	VO	Song	Sad	Strong	Kids	R1	A23	4	4	1	1
02-02-04-02-01-01-24.mp4	VO	Song	Sad	Strong	Kids	R1	A24	4	4	1	1
02-02-04-02-01-02-01.mp4	VO	Song	Sad	Strong	Kids	R2	A1	4	4	1	1
02-02-04-02-01-02-02.mp4	VO	Song	Sad	Strong	Kids	R2	A2	4	4	1	1
02-02-04-02-01-02-03.mp4	VO	Song	Sad	Strong	Kids	R2	A3	4	4	1	1
02-02-04-02-01-02-04.mp4	VO	Song	Sad	Strong	Kids	R2	A4	6	6	0	0
02-02-04-02-01-02-05.mp4	VO	Song	Sad	Strong	Kids	R2	A5	4	4	1	1
02-02-04-02-01-02-06.mp4	VO	Song	Sad	Strong	Kids	R2	A6	4	4	1	1
02-02-04-02-01-02-07.mp4	VO	Song	Sad	Strong	Kids	R2	A7	4	4	1	1
02-02-04-02-01-02-08.mp4	VO	Song	Sad	Strong	Kids	R2	A8	4	4	1	1
02-02-04-02-01-02-09.mp4	VO	Song	Sad	Strong	Kids	R2	A9	4	4	1	1
02-02-04-02-01-02-10.mp4	VO	Song	Sad	Strong	Kids	R2	A10	4	4	1	1
02-02-04-02-01-02-11.mp4	VO	Song	Sad	Strong	Kids	R2	A11	4	4	1	1
02-02-04-02-01-02-12.mp4	VO	Song	Sad	Strong	Kids	R2	A12	4	4	1	1
02-02-04-02-01-02-13.mp4	VO	Song	Sad	Strong	Kids	R2	A13	4	4	1	1
02-02-04-02-01-02-14.mp4	VO	Song	Sad	Strong	Kids	R2	A14	4	4	1	1
02-02-04-02-01-02-15.mp4	VO	Song	Sad	Strong	Kids	R2	A15	4	4	1	1
02-02-04-02-01-02-16.mp4	VO	Song	Sad	Strong	Kids	R2	A16	4	4	1	1
02-02-04-02-01-02-17.mp4	VO	Song	Sad	Strong	Kids	R2	A17	4	4	1	1
02-02-04-02-01-02-19.mp4	VO	Song	Sad	Strong	Kids	R2	A19	4	4	1	1
02-02-04-02-01-02-20.mp4	VO	Song	Sad	Strong	Kids	R2	A20	4	4	1	1
02-02-04-02-01-02-21.mp4	VO	Song	Sad	Strong	Kids	R2	A21	4	4	1	1
02-02-04-02-01-02-22.mp4	VO	Song	Sad	Strong	Kids	R2	A22	4	4	1	1
02-02-04-02-01-02-23.mp4	VO	Song	Sad	Strong	Kids	R2	A23	4	4	1	1
02-02-04-02-01-02-24.mp4	VO	Song	Sad	Strong	Kids	R2	A24	4	4	1	1
02-02-04-02-02-01-01.mp4	VO	Song	Sad	Strong	Dogs	R1	A1	4	4	1	1
02-02-04-02-02-01-02.mp4	VO	Song	Sad	Strong	Dogs	R1	A2	4	4	1	1
02-02-04-02-02-01-03.mp4	VO	Song	Sad	Strong	Dogs	R1	A3	4	4	1	1
02-02-04-02-02-01-04.mp4	VO	Song	Sad	Strong	Dogs	R1	A4	4	4	1	1
02-02-04-02-02-01-05.mp4	VO	Song	Sad	Strong	Dogs	R1	A5	6	6	0	0
02-02-04-02-02-01-06.mp4	VO	Song	Sad	Strong	Dogs	R1	A6	4	4	1	1
02-02-04-02-02-01-07.mp4	VO	Song	Sad	Strong	Dogs	R1	A7	4	4	1	1
02-02-04-02-02-01-08.mp4	VO	Song	Sad	Strong	Dogs	R1	A8	4	4	1	1
02-02-04-02-02-01-09.mp4	VO	Song	Sad	Strong	Dogs	R1	A9	4	4	1	1
02-02-04-02-02-01-10.mp4	VO	Song	Sad	Strong	Dogs	R1	A10	6	6	0	0
02-02-04-02-02-01-11.mp4	VO	Song	Sad	Strong	Dogs	R1	A11	4	4	1	1
02-02-04-02-02-01-12.mp4	VO	Song	Sad	Strong	Dogs	R1	A12	4	4	1	1
02-02-04-02-02-01-13.mp4	VO	Song	Sad	Strong	Dogs	R1	A13	4	1	1	0
02-02-04-02-02-01-14.mp4	VO	Song	Sad	Strong	Dogs	R1	A14	6	6	0	0
02-02-04-02-02-01-15.mp4	VO	Song	Sad	Strong	Dogs	R1	A15	4	1	1	0
02-02-04-02-02-01-16.mp4	VO	Song	Sad	Strong	Dogs	R1	A16	4	4	1	1
02-02-04-02-02-01-17.mp4	VO	Song	Sad	Strong	Dogs	R1	A17	4	4	1	1
02-02-04-02-02-01-19.mp4	VO	Song	Sad	Strong	Dogs	R1	A19	4	4	1	1
02-02-04-02-02-01-20.mp4	VO	Song	Sad	Strong	Dogs	R1	A20	6	6	0	0
02-02-04-02-02-01-21.mp4	VO	Song	Sad	Strong	Dogs	R1	A21	4	4	1	1
02-02-04-02-02-01-22.mp4	VO	Song	Sad	Strong	Dogs	R1	A22	4	6	1	0
02-02-04-02-02-01-23.mp4	VO	Song	Sad	Strong	Dogs	R1	A23	4	1	1	0
02-02-04-02-02-01-24.mp4	VO	Song	Sad	Strong	Dogs	R1	A24	4	4	1	1
02-02-04-02-02-02-01.mp4	VO	Song	Sad	Strong	Dogs	R2	A1	4	4	1	1
02-02-04-02-02-02-02.mp4	VO	Song	Sad	Strong	Dogs	R2	A2	4	4	1	1
02-02-04-02-02-02-03.mp4	VO	Song	Sad	Strong	Dogs	R2	A3	4	4	1	1
02-02-04-02-02-02-04.mp4	VO	Song	Sad	Strong	Dogs	R2	A4	4	4	1	1
02-02-04-02-02-02-05.mp4	VO	Song	Sad	Strong	Dogs	R2	A5	4	4	1	1
02-02-04-02-02-02-06.mp4	VO	Song	Sad	Strong	Dogs	R2	A6	4	4	1	1
02-02-04-02-02-02-07.mp4	VO	Song	Sad	Strong	Dogs	R2	A7	3	3	0	0
02-02-04-02-02-02-08.mp4	VO	Song	Sad	Strong	Dogs	R2	A8	4	4	1	1
02-02-04-02-02-02-09.mp4	VO	Song	Sad	Strong	Dogs	R2	A9	4	4	1	1
02-02-04-02-02-02-10.mp4	VO	Song	Sad	Strong	Dogs	R2	A10	4	4	1	1
02-02-04-02-02-02-11.mp4	VO	Song	Sad	Strong	Dogs	R2	A11	4	4	1	1
02-02-04-02-02-02-12.mp4	VO	Song	Sad	Strong	Dogs	R2	A12	4	4	1	1
02-02-04-02-02-02-13.mp4	VO	Song	Sad	Strong	Dogs	R2	A13	4	1	1	0
02-02-04-02-02-02-14.mp4	VO	Song	Sad	Strong	Dogs	R2	A14	6	4	0	1
02-02-04-02-02-02-15.mp4	VO	Song	Sad	Strong	Dogs	R2	A15	6	6	0	0
02-02-04-02-02-02-16.mp4	VO	Song	Sad	Strong	Dogs	R2	A16	4	4	1	1
02-02-04-02-02-02-17.mp4	VO	Song	Sad	Strong	Dogs	R2	A17	4	4	1	1
02-02-04-02-02-02-19.mp4	VO	Song	Sad	Strong	Dogs	R2	A19	4	4	1	1
02-02-04-02-02-02-20.mp4	VO	Song	Sad	Strong	Dogs	R2	A20	4	4	1	1
02-02-04-02-02-02-21.mp4	VO	Song	Sad	Strong	Dogs	R2	A21	4	6	1	0
02-02-04-02-02-02-22.mp4	VO	Song	Sad	Strong	Dogs	R2	A22	4	4	1	1
02-02-04-02-02-02-23.mp4	VO	Song	Sad	Strong	Dogs	R2	A23	4	4	1	1
02-02-04-02-02-02-24.mp4	VO	Song	Sad	Strong	Dogs	R2	A24	5	5	0	0
02-02-05-01-01-01-01.mp4	VO	Song	Angry	Normal	Kids	R1	A1	5	5	1	1
02-02-05-01-01-01-02.mp4	VO	Song	Angry	Normal	Kids	R1	A2	5	9	1	0
02-02-05-01-01-01-03.mp4	VO	Song	Angry	Normal	Kids	R1	A3	5	5	1	1
02-02-05-01-01-01-04.mp4	VO	Song	Angry	Normal	Kids	R1	A4	5	9	1	0
02-02-05-01-01-01-05.mp4	VO	Song	Angry	Normal	Kids	R1	A5	5	5	1	1
02-02-05-01-01-01-06.mp4	VO	Song	Angry	Normal	Kids	R1	A6	5	5	1	1
02-02-05-01-01-01-07.mp4	VO	Song	Angry	Normal	Kids	R1	A7	5	5	1	1
02-02-05-01-01-01-08.mp4	VO	Song	Angry	Normal	Kids	R1	A8	4	5	0	1
02-02-05-01-01-01-09.mp4	VO	Song	Angry	Normal	Kids	R1	A9	5	9	1	0
02-02-05-01-01-01-10.mp4	VO	Song	Angry	Normal	Kids	R1	A10	5	5	1	1
02-02-05-01-01-01-11.mp4	VO	Song	Angry	Normal	Kids	R1	A11	1	4	0	0
02-02-05-01-01-01-12.mp4	VO	Song	Angry	Normal	Kids	R1	A12	5	5	1	1
02-02-05-01-01-01-13.mp4	VO	Song	Angry	Normal	Kids	R1	A13	5	5	1	1
02-02-05-01-01-01-14.mp4	VO	Song	Angry	Normal	Kids	R1	A14	5	5	1	1
02-02-05-01-01-01-15.mp4	VO	Song	Angry	Normal	Kids	R1	A15	5	5	1	1
02-02-05-01-01-01-16.mp4	VO	Song	Angry	Normal	Kids	R1	A16	5	5	1	1
02-02-05-01-01-01-17.mp4	VO	Song	Angry	Normal	Kids	R1	A17	5	5	1	1
02-02-05-01-01-01-19.mp4	VO	Song	Angry	Normal	Kids	R1	A19	5	5	1	1
02-02-05-01-01-01-20.mp4	VO	Song	Angry	Normal	Kids	R1	A20	5	5	1	1
02-02-05-01-01-01-21.mp4	VO	Song	Angry	Normal	Kids	R1	A21	4	5	0	1
02-02-05-01-01-01-22.mp4	VO	Song	Angry	Normal	Kids	R1	A22	1	5	0	1
02-02-05-01-01-01-23.mp4	VO	Song	Angry	Normal	Kids	R1	A23	5	5	1	1
02-02-05-01-01-01-24.mp4	VO	Song	Angry	Normal	Kids	R1	A24	5	5	1	1
02-02-05-01-01-02-01.mp4	VO	Song	Angry	Normal	Kids	R2	A1	5	5	1	1
02-02-05-01-01-02-02.mp4	VO	Song	Angry	Normal	Kids	R2	A2	6	6	0	0
02-02-05-01-01-02-03.mp4	VO	Song	Angry	Normal	Kids	R2	A3	5	5	1	1
02-02-05-01-01-02-04.mp4	VO	Song	Angry	Normal	Kids	R2	A4	5	5	1	1
02-02-05-01-01-02-05.mp4	VO	Song	Angry	Normal	Kids	R2	A5	5	4	1	0
02-02-05-01-01-02-06.mp4	VO	Song	Angry	Normal	Kids	R2	A6	5	5	1	1
02-02-05-01-01-02-07.mp4	VO	Song	Angry	Normal	Kids	R2	A7	5	5	1	1
02-02-05-01-01-02-08.mp4	VO	Song	Angry	Normal	Kids	R2	A8	5	5	1	1
02-02-05-01-01-02-09.mp4	VO	Song	Angry	Normal	Kids	R2	A9	1	5	0	1
02-02-05-01-01-02-10.mp4	VO	Song	Angry	Normal	Kids	R2	A10	5	5	1	1
02-02-05-01-01-02-11.mp4	VO	Song	Angry	Normal	Kids	R2	A11	5	5	1	1
02-02-05-01-01-02-12.mp4	VO	Song	Angry	Normal	Kids	R2	A12	5	5	1	1
02-02-05-01-01-02-13.mp4	VO	Song	Angry	Normal	Kids	R2	A13	9	9	0	0
02-02-05-01-01-02-14.mp4	VO	Song	Angry	Normal	Kids	R2	A14	5	5	1	1
02-02-05-01-01-02-15.mp4	VO	Song	Angry	Normal	Kids	R2	A15	5	5	1	1
02-02-05-01-01-02-16.mp4	VO	Song	Angry	Normal	Kids	R2	A16	5	5	1	1
02-02-05-01-01-02-17.mp4	VO	Song	Angry	Normal	Kids	R2	A17	5	5	1	1
02-02-05-01-01-02-19.mp4	VO	Song	Angry	Normal	Kids	R2	A19	4	5	0	1
02-02-05-01-01-02-20.mp4	VO	Song	Angry	Normal	Kids	R2	A20	5	5	1	1
02-02-05-01-01-02-21.mp4	VO	Song	Angry	Normal	Kids	R2	A21	5	9	1	0
02-02-05-01-01-02-22.mp4	VO	Song	Angry	Normal	Kids	R2	A22	5	5	1	1
02-02-05-01-01-02-23.mp4	VO	Song	Angry	Normal	Kids	R2	A23	5	5	1	1
02-02-05-01-01-02-24.mp4	VO	Song	Angry	Normal	Kids	R2	A24	5	6	1	0
02-02-05-01-02-01-01.mp4	VO	Song	Angry	Normal	Dogs	R1	A1	5	5	1	1
02-02-05-01-02-01-02.mp4	VO	Song	Angry	Normal	Dogs	R1	A2	5	5	1	1
02-02-05-01-02-01-03.mp4	VO	Song	Angry	Normal	Dogs	R1	A3	5	5	1	1
02-02-05-01-02-01-04.mp4	VO	Song	Angry	Normal	Dogs	R1	A4	5	9	1	0
02-02-05-01-02-01-05.mp4	VO	Song	Angry	Normal	Dogs	R1	A5	4	5	0	1
02-02-05-01-02-01-06.mp4	VO	Song	Angry	Normal	Dogs	R1	A6	5	5	1	1
02-02-05-01-02-01-07.mp4	VO	Song	Angry	Normal	Dogs	R1	A7	5	5	1	1
02-02-05-01-02-01-08.mp4	VO	Song	Angry	Normal	Dogs	R1	A8	5	5	1	1
02-02-05-01-02-01-09.mp4	VO	Song	Angry	Normal	Dogs	R1	A9	5	5	1	1
02-02-05-01-02-01-10.mp4	VO	Song	Angry	Normal	Dogs	R1	A10	5	5	1	1
02-02-05-01-02-01-11.mp4	VO	Song	Angry	Normal	Dogs	R1	A11	5	5	1	1
02-02-05-01-02-01-12.mp4	VO	Song	Angry	Normal	Dogs	R1	A12	5	5	1	1
02-02-05-01-02-01-13.mp4	VO	Song	Angry	Normal	Dogs	R1	A13	5	5	1	1
02-02-05-01-02-01-14.mp4	VO	Song	Angry	Normal	Dogs	R1	A14	5	5	1	1
02-02-05-01-02-01-15.mp4	VO	Song	Angry	Normal	Dogs	R1	A15	2	2	0	0
02-02-05-01-02-01-16.mp4	VO	Song	Angry	Normal	Dogs	R1	A16	5	5	1	1
02-02-05-01-02-01-17.mp4	VO	Song	Angry	Normal	Dogs	R1	A17	5	5	1	1
02-02-05-01-02-01-19.mp4	VO	Song	Angry	Normal	Dogs	R1	A19	5	5	1	1
02-02-05-01-02-01-20.mp4	VO	Song	Angry	Normal	Dogs	R1	A20	5	5	1	1
02-02-05-01-02-01-21.mp4	VO	Song	Angry	Normal	Dogs	R1	A21	3	3	0	0
02-02-05-01-02-01-22.mp4	VO	Song	Angry	Normal	Dogs	R1	A22	1	5	0	1
02-02-05-01-02-01-23.mp4	VO	Song	Angry	Normal	Dogs	R1	A23	5	5	1	1
02-02-05-01-02-01-24.mp4	VO	Song	Angry	Normal	Dogs	R1	A24	5	5	1	1
02-02-05-01-02-02-01.mp4	VO	Song	Angry	Normal	Dogs	R2	A1	5	5	1	1
02-02-05-01-02-02-02.mp4	VO	Song	Angry	Normal	Dogs	R2	A2	5	5	1	1
02-02-05-01-02-02-03.mp4	VO	Song	Angry	Normal	Dogs	R2	A3	5	5	1	1
02-02-05-01-02-02-04.mp4	VO	Song	Angry	Normal	Dogs	R2	A4	5	5	1	1
02-02-05-01-02-02-05.mp4	VO	Song	Angry	Normal	Dogs	R2	A5	5	5	1	1
02-02-05-01-02-02-06.mp4	VO	Song	Angry	Normal	Dogs	R2	A6	5	5	1	1
02-02-05-01-02-02-07.mp4	VO	Song	Angry	Normal	Dogs	R2	A7	5	5	1	1
02-02-05-01-02-02-08.mp4	VO	Song	Angry	Normal	Dogs	R2	A8	5	5	1	1
02-02-05-01-02-02-09.mp4	VO	Song	Angry	Normal	Dogs	R2	A9	5	5	1	1
02-02-05-01-02-02-10.mp4	VO	Song	Angry	Normal	Dogs	R2	A10	5	5	1	1
02-02-05-01-02-02-11.mp4	VO	Song	Angry	Normal	Dogs	R2	A11	5	5	1	1
02-02-05-01-02-02-12.mp4	VO	Song	Angry	Normal	Dogs	R2	A12	5	5	1	1
02-02-05-01-02-02-13.mp4	VO	Song	Angry	Normal	Dogs	R2	A13	5	5	1	1
02-02-05-01-02-02-14.mp4	VO	Song	Angry	Normal	Dogs	R2	A14	5	5	1	1
02-02-05-01-02-02-15.mp4	VO	Song	Angry	Normal	Dogs	R2	A15	5	5	1	1
02-02-05-01-02-02-16.mp4	VO	Song	Angry	Normal	Dogs	R2	A16	4	5	0	1
02-02-05-01-02-02-17.mp4	VO	Song	Angry	Normal	Dogs	R2	A17	5	5	1	1
02-02-05-01-02-02-19.mp4	VO	Song	Angry	Normal	Dogs	R2	A19	5	5	1	1
02-02-05-01-02-02-20.mp4	VO	Song	Angry	Normal	Dogs	R2	A20	5	5	1	1
02-02-05-01-02-02-21.mp4	VO	Song	Angry	Normal	Dogs	R2	A21	5	5	1	1
02-02-05-01-02-02-22.mp4	VO	Song	Angry	Normal	Dogs	R2	A22	1	5	0	1
02-02-05-01-02-02-23.mp4	VO	Song	Angry	Normal	Dogs	R2	A23	5	5	1	1
02-02-05-01-02-02-24.mp4	VO	Song	Angry	Normal	Dogs	R2	A24	9	4	0	0
02-02-05-02-01-01-01.mp4	VO	Song	Angry	Strong	Kids	R1	A1	5	5	1	1
02-02-05-02-01-01-02.mp4	VO	Song	Angry	Strong	Kids	R1	A2	5	4	1	0
02-02-05-02-01-01-03.mp4	VO	Song	Angry	Strong	Kids	R1	A3	5	5	1	1
02-02-05-02-01-01-04.mp4	VO	Song	Angry	Strong	Kids	R1	A4	5	5	1	1
02-02-05-02-01-01-05.mp4	VO	Song	Angry	Strong	Kids	R1	A5	4	4	0	0
02-02-05-02-01-01-06.mp4	VO	Song	Angry	Strong	Kids	R1	A6	5	5	1	1
02-02-05-02-01-01-07.mp4	VO	Song	Angry	Strong	Kids	R1	A7	5	5	1	1
02-02-05-02-01-01-08.mp4	VO	Song	Angry	Strong	Kids	R1	A8	5	5	1	1
02-02-05-02-01-01-09.mp4	VO	Song	Angry	Strong	Kids	R1	A9	5	5	1	1
02-02-05-02-01-01-10.mp4	VO	Song	Angry	Strong	Kids	R1	A10	5	5	1	1
02-02-05-02-01-01-11.mp4	VO	Song	Angry	Strong	Kids	R1	A11	5	5	1	1
02-02-05-02-01-01-12.mp4	VO	Song	Angry	Strong	Kids	R1	A12	5	5	1	1
02-02-05-02-01-01-13.mp4	VO	Song	Angry	Strong	Kids	R1	A13	5	5	1	1
02-02-05-02-01-01-14.mp4	VO	Song	Angry	Strong	Kids	R1	A14	5	5	1	1
02-02-05-02-01-01-15.mp4	VO	Song	Angry	Strong	Kids	R1	A15	5	5	1	1
02-02-05-02-01-01-16.mp4	VO	Song	Angry	Strong	Kids	R1	A16	5	5	1	1
02-02-05-02-01-01-17.mp4	VO	Song	Angry	Strong	Kids	R1	A17	5	5	1	1
02-02-05-02-01-01-19.mp4	VO	Song	Angry	Strong	Kids	R1	A19	5	5	1	1
02-02-05-02-01-01-20.mp4	VO	Song	Angry	Strong	Kids	R1	A20	5	5	1	1
02-02-05-02-01-01-21.mp4	VO	Song	Angry	Strong	Kids	R1	A21	5	5	1	1
02-02-05-02-01-01-22.mp4	VO	Song	Angry	Strong	Kids	R1	A22	5	5	1	1
02-02-05-02-01-01-23.mp4	VO	Song	Angry	Strong	Kids	R1	A23	5	5	1	1
02-02-05-02-01-01-24.mp4	VO	Song	Angry	Strong	Kids	R1	A24	5	5	1	1
02-02-05-02-01-02-01.mp4	VO	Song	Angry	Strong	Kids	R2	A1	5	5	1	1
02-02-05-02-01-02-02.mp4	VO	Song	Angry	Strong	Kids	R2	A2	5	5	1	1
02-02-05-02-01-02-03.mp4	VO	Song	Angry	Strong	Kids	R2	A3	5	5	1	1
02-02-05-02-01-02-04.mp4	VO	Song	Angry	Strong	Kids	R2	A4	5	5	1	1
02-02-05-02-01-02-05.mp4	VO	Song	Angry	Strong	Kids	R2	A5	5	5	1	1
02-02-05-02-01-02-06.mp4	VO	Song	Angry	Strong	Kids	R2	A6	5	5	1	1
02-02-05-02-01-02-07.mp4	VO	Song	Angry	Strong	Kids	R2	A7	5	6	1	0
02-02-05-02-01-02-08.mp4	VO	Song	Angry	Strong	Kids	R2	A8	5	5	1	1
02-02-05-02-01-02-09.mp4	VO	Song	Angry	Strong	Kids	R2	A9	5	5	1	1
02-02-05-02-01-02-10.mp4	VO	Song	Angry	Strong	Kids	R2	A10	5	5	1	1
02-02-05-02-01-02-11.mp4	VO	Song	Angry	Strong	Kids	R2	A11	5	5	1	1
02-02-05-02-01-02-12.mp4	VO	Song	Angry	Strong	Kids	R2	A12	6	5	0	1
02-02-05-02-01-02-13.mp4	VO	Song	Angry	Strong	Kids	R2	A13	1	5	0	1
02-02-05-02-01-02-14.mp4	VO	Song	Angry	Strong	Kids	R2	A14	5	5	1	1
02-02-05-02-01-02-15.mp4	VO	Song	Angry	Strong	Kids	R2	A15	4	4	0	0
02-02-05-02-01-02-16.mp4	VO	Song	Angry	Strong	Kids	R2	A16	5	5	1	1
02-02-05-02-01-02-17.mp4	VO	Song	Angry	Strong	Kids	R2	A17	5	5	1	1
02-02-05-02-01-02-19.mp4	VO	Song	Angry	Strong	Kids	R2	A19	5	5	1	1
02-02-05-02-01-02-20.mp4	VO	Song	Angry	Strong	Kids	R2	A20	5	5	1	1
02-02-05-02-01-02-21.mp4	VO	Song	Angry	Strong	Kids	R2	A21	5	5	1	1
02-02-05-02-01-02-22.mp4	VO	Song	Angry	Strong	Kids	R2	A22	5	5	1	1
02-02-05-02-01-02-23.mp4	VO	Song	Angry	Strong	Kids	R2	A23	5	5	1	1
02-02-05-02-01-02-24.mp4	VO	Song	Angry	Strong	Kids	R2	A24	5	5	1	1
02-02-05-02-02-01-01.mp4	VO	Song	Angry	Strong	Dogs	R1	A1	5	5	1	1
02-02-05-02-02-01-02.mp4	VO	Song	Angry	Strong	Dogs	R1	A2	5	5	1	1
02-02-05-02-02-01-03.mp4	VO	Song	Angry	Strong	Dogs	R1	A3	5	4	1	0
02-02-05-02-02-01-04.mp4	VO	Song	Angry	Strong	Dogs	R1	A4	5	5	1	1
02-02-05-02-02-01-05.mp4	VO	Song	Angry	Strong	Dogs	R1	A5	5	5	1	1
02-02-05-02-02-01-06.mp4	VO	Song	Angry	Strong	Dogs	R1	A6	9	5	0	1
02-02-05-02-02-01-07.mp4	VO	Song	Angry	Strong	Dogs	R1	A7	5	5	1	1
02-02-05-02-02-01-08.mp4	VO	Song	Angry	Strong	Dogs	R1	A8	5	5	1	1
02-02-05-02-02-01-09.mp4	VO	Song	Angry	Strong	Dogs	R1	A9	5	5	1	1
02-02-05-02-02-01-10.mp4	VO	Song	Angry	Strong	Dogs	R1	A10	5	5	1	1
02-02-05-02-02-01-11.mp4	VO	Song	Angry	Strong	Dogs	R1	A11	5	5	1	1
02-02-05-02-02-01-12.mp4	VO	Song	Angry	Strong	Dogs	R1	A12	5	5	1	1
02-02-05-02-02-01-13.mp4	VO	Song	Angry	Strong	Dogs	R1	A13	5	5	1	1
02-02-05-02-02-01-14.mp4	VO	Song	Angry	Strong	Dogs	R1	A14	5	6	1	0
02-02-05-02-02-01-15.mp4	VO	Song	Angry	Strong	Dogs	R1	A15	5	4	1	0
02-02-05-02-02-01-16.mp4	VO	Song	Angry	Strong	Dogs	R1	A16	5	5	1	1
02-02-05-02-02-01-17.mp4	VO	Song	Angry	Strong	Dogs	R1	A17	6	5	0	1
02-02-05-02-02-01-19.mp4	VO	Song	Angry	Strong	Dogs	R1	A19	5	5	1	1
02-02-05-02-02-01-20.mp4	VO	Song	Angry	Strong	Dogs	R1	A20	6	6	0	0
02-02-05-02-02-01-21.mp4	VO	Song	Angry	Strong	Dogs	R1	A21	5	5	1	1
02-02-05-02-02-01-22.mp4	VO	Song	Angry	Strong	Dogs	R1	A22	5	5	1	1
02-02-05-02-02-01-23.mp4	VO	Song	Angry	Strong	Dogs	R1	A23	5	5	1	1
02-02-05-02-02-01-24.mp4	VO	Song	Angry	Strong	Dogs	R1	A24	5	5	1	1
02-02-05-02-02-02-01.mp4	VO	Song	Angry	Strong	Dogs	R2	A1	5	5	1	1
02-02-05-02-02-02-02.mp4	VO	Song	Angry	Strong	Dogs	R2	A2	5	5	1	1
02-02-05-02-02-02-03.mp4	VO	Song	Angry	Strong	Dogs	R2	A3	5	5	1	1
02-02-05-02-02-02-04.mp4	VO	Song	Angry	Strong	Dogs	R2	A4	5	6	1	0
02-02-05-02-02-02-05.mp4	VO	Song	Angry	Strong	Dogs	R2	A5	5	5	1	1
02-02-05-02-02-02-06.mp4	VO	Song	Angry	Strong	Dogs	R2	A6	5	5	1	1
02-02-05-02-02-02-07.mp4	VO	Song	Angry	Strong	Dogs	R2	A7	5	5	1	1
02-02-05-02-02-02-08.mp4	VO	Song	Angry	Strong	Dogs	R2	A8	5	5	1	1
02-02-05-02-02-02-09.mp4	VO	Song	Angry	Strong	Dogs	R2	A9	5	5	1	1
02-02-05-02-02-02-10.mp4	VO	Song	Angry	Strong	Dogs	R2	A10	5	5	1	1
02-02-05-02-02-02-11.mp4	VO	Song	Angry	Strong	Dogs	R2	A11	5	5	1	1
02-02-05-02-02-02-12.mp4	VO	Song	Angry	Strong	Dogs	R2	A12	5	5	1	1
02-02-05-02-02-02-13.mp4	VO	Song	Angry	Strong	Dogs	R2	A13	5	5	1	1
02-02-05-02-02-02-14.mp4	VO	Song	Angry	Strong	Dogs	R2	A14	5	5	1	1
02-02-05-02-02-02-15.mp4	VO	Song	Angry	Strong	Dogs	R2	A15	5	5	1	1
02-02-05-02-02-02-16.mp4	VO	Song	Angry	Strong	Dogs	R2	A16	5	5	1	1
02-02-05-02-02-02-17.mp4	VO	Song	Angry	Strong	Dogs	R2	A17	5	5	1	1
02-02-05-02-02-02-19.mp4	VO	Song	Angry	Strong	Dogs	R2	A19	5	5	1	1
02-02-05-02-02-02-20.mp4	VO	Song	Angry	Strong	Dogs	R2	A20	6	6	0	0
02-02-05-02-02-02-21.mp4	VO	Song	Angry	Strong	Dogs	R2	A21	5	5	1	1
02-02-05-02-02-02-22.mp4	VO	Song	Angry	Strong	Dogs	R2	A22	5	5	1	1
02-02-05-02-02-02-23.mp4	VO	Song	Angry	Strong	Dogs	R2	A23	5	5	1	1
02-02-05-02-02-02-24.mp4	VO	Song	Angry	Strong	Dogs	R2	A24	5	5	1	1
02-02-06-01-01-01-01.mp4	VO	Song	Fearful	Normal	Kids	R1	A1	4	4	0	0
02-02-06-01-01-01-02.mp4	VO	Song	Fearful	Normal	Kids	R1	A2	4	5	0	0
02-02-06-01-01-01-03.mp4	VO	Song	Fearful	Normal	Kids	R1	A3	6	6	1	1
02-02-06-01-01-01-04.mp4	VO	Song	Fearful	Normal	Kids	R1	A4	6	6	1	1
02-02-06-01-01-01-05.mp4	VO	Song	Fearful	Normal	Kids	R1	A5	6	6	1	1
02-02-06-01-01-01-06.mp4	VO	Song	Fearful	Normal	Kids	R1	A6	4	4	0	0
02-02-06-01-01-01-07.mp4	VO	Song	Fearful	Normal	Kids	R1	A7	5	6	0	1
02-02-06-01-01-01-08.mp4	VO	Song	Fearful	Normal	Kids	R1	A8	5	6	0	1
02-02-06-01-01-01-09.mp4	VO	Song	Fearful	Normal	Kids	R1	A9	6	6	1	1
02-02-06-01-01-01-10.mp4	VO	Song	Fearful	Normal	Kids	R1	A10	4	4	0	0
02-02-06-01-01-01-11.mp4	VO	Song	Fearful	Normal	Kids	R1	A11	6	6	1	1
02-02-06-01-01-01-12.mp4	VO	Song	Fearful	Normal	Kids	R1	A12	6	6	1	1
02-02-06-01-01-01-13.mp4	VO	Song	Fearful	Normal	Kids	R1	A13	4	1	0	0
02-02-06-01-01-01-14.mp4	VO	Song	Fearful	Normal	Kids	R1	A14	6	5	1	0
02-02-06-01-01-01-15.mp4	VO	Song	Fearful	Normal	Kids	R1	A15	6	4	1	0
02-02-06-01-01-01-16.mp4	VO	Song	Fearful	Normal	Kids	R1	A16	6	6	1	1
02-02-06-01-01-01-17.mp4	VO	Song	Fearful	Normal	Kids	R1	A17	4	4	0	0
02-02-06-01-01-01-19.mp4	VO	Song	Fearful	Normal	Kids	R1	A19	5	6	0	1
02-02-06-01-01-01-20.mp4	VO	Song	Fearful	Normal	Kids	R1	A20	6	6	1	1
02-02-06-01-01-01-21.mp4	VO	Song	Fearful	Normal	Kids	R1	A21	6	6	1	1
02-02-06-01-01-01-22.mp4	VO	Song	Fearful	Normal	Kids	R1	A22	9	1	0	0
02-02-06-01-01-01-23.mp4	VO	Song	Fearful	Normal	Kids	R1	A23	6	6	1	1
02-02-06-01-01-01-24.mp4	VO	Song	Fearful	Normal	Kids	R1	A24	6	6	1	1
02-02-06-01-01-02-01.mp4	VO	Song	Fearful	Normal	Kids	R2	A1	4	2	0	0
02-02-06-01-01-02-02.mp4	VO	Song	Fearful	Normal	Kids	R2	A2	4	4	0	0
02-02-06-01-01-02-03.mp4	VO	Song	Fearful	Normal	Kids	R2	A3	6	4	1	0
02-02-06-01-01-02-04.mp4	VO	Song	Fearful	Normal	Kids	R2	A4	6	5	1	0
02-02-06-01-01-02-05.mp4	VO	Song	Fearful	Normal	Kids	R2	A5	6	6	1	1
02-02-06-01-01-02-06.mp4	VO	Song	Fearful	Normal	Kids	R2	A6	4	6	0	1
02-02-06-01-01-02-07.mp4	VO	Song	Fearful	Normal	Kids	R2	A7	6	6	1	1
02-02-06-01-01-02-08.mp4	VO	Song	Fearful	Normal	Kids	R2	A8	6	6	1	1
02-02-06-01-01-02-09.mp4	VO	Song	Fearful	Normal	Kids	R2	A9	6	6	1	1
02-02-06-01-01-02-10.mp4	VO	Song	Fearful	Normal	Kids	R2	A10	4	6	0	1
02-02-06-01-01-02-11.mp4	VO	Song	Fearful	Normal	Kids	R2	A11	6	6	1	1
02-02-06-01-01-02-12.mp4	VO	Song	Fearful	Normal	Kids	R2	A12	6	6	1	1
02-02-06-01-01-02-13.mp4	VO	Song	Fearful	Normal	Kids	R2	A13	1	1	0	0
02-02-06-01-01-02-14.mp4	VO	Song	Fearful	Normal	Kids	R2	A14	6	6	1	1
02-02-06-01-01-02-15.mp4	VO	Song	Fearful	Normal	Kids	R2	A15	6	6	1	1
02-02-06-01-01-02-16.mp4	VO	Song	Fearful	Normal	Kids	R2	A16	6	6	1	1
02-02-06-01-01-02-17.mp4	VO	Song	Fearful	Normal	Kids	R2	A17	6	4	1	0
02-02-06-01-01-02-19.mp4	VO	Song	Fearful	Normal	Kids	R2	A19	4	4	0	0
02-02-06-01-01-02-20.mp4	VO	Song	Fearful	Normal	Kids	R2	A20	6	6	1	1
02-02-06-01-01-02-21.mp4	VO	Song	Fearful	Normal	Kids	R2	A21	6	6	1	1
02-02-06-01-01-02-22.mp4	VO	Song	Fearful	Normal	Kids	R2	A22	6	6	1	1
02-02-06-01-01-02-23.mp4	VO	Song	Fearful	Normal	Kids	R2	A23	6	5	1	0
02-02-06-01-01-02-24.mp4	VO	Song	Fearful	Normal	Kids	R2	A24	6	1	1	0
02-02-06-01-02-01-01.mp4	VO	Song	Fearful	Normal	Dogs	R1	A1	6	6	1	1
02-02-06-01-02-01-02.mp4	VO	Song	Fearful	Normal	Dogs	R1	A2	4	4	0	0
02-02-06-01-02-01-03.mp4	VO	Song	Fearful	Normal	Dogs	R1	A3	6	4	1	0
02-02-06-01-02-01-04.mp4	VO	Song	Fearful	Normal	Dogs	R1	A4	5	6	0	1
02-02-06-01-02-01-05.mp4	VO	Song	Fearful	Normal	Dogs	R1	A5	6	6	1	1
02-02-06-01-02-01-06.mp4	VO	Song	Fearful	Normal	Dogs	R1	A6	6	6	1	1
02-02-06-01-02-01-07.mp4	VO	Song	Fearful	Normal	Dogs	R1	A7	6	6	1	1
02-02-06-01-02-01-08.mp4	VO	Song	Fearful	Normal	Dogs	R1	A8	6	6	1	1
02-02-06-01-02-01-09.mp4	VO	Song	Fearful	Normal	Dogs	R1	A9	6	6	1	1
02-02-06-01-02-01-10.mp4	VO	Song	Fearful	Normal	Dogs	R1	A10	6	3	1	0
02-02-06-01-02-01-11.mp4	VO	Song	Fearful	Normal	Dogs	R1	A11	6	6	1	1
02-02-06-01-02-01-12.mp4	VO	Song	Fearful	Normal	Dogs	R1	A12	9	9	0	0
02-02-06-01-02-01-13.mp4	VO	Song	Fearful	Normal	Dogs	R1	A13	5	5	0	0
02-02-06-01-02-01-14.mp4	VO	Song	Fearful	Normal	Dogs	R1	A14	6	6	1	1
02-02-06-01-02-01-15.mp4	VO	Song	Fearful	Normal	Dogs	R1	A15	6	6	1	1
02-02-06-01-02-01-16.mp4	VO	Song	Fearful	Normal	Dogs	R1	A16	6	6	1	1
02-02-06-01-02-01-17.mp4	VO	Song	Fearful	Normal	Dogs	R1	A17	9	6	0	1
02-02-06-01-02-01-19.mp4	VO	Song	Fearful	Normal	Dogs	R1	A19	9	6	0	1
02-02-06-01-02-01-20.mp4	VO	Song	Fearful	Normal	Dogs	R1	A20	6	6	1	1
02-02-06-01-02-01-21.mp4	VO	Song	Fearful	Normal	Dogs	R1	A21	1	6	0	1
02-02-06-01-02-01-22.mp4	VO	Song	Fearful	Normal	Dogs	R1	A22	6	6	1	1
02-02-06-01-02-01-23.mp4	VO	Song	Fearful	Normal	Dogs	R1	A23	9	9	0	0
02-02-06-01-02-01-24.mp4	VO	Song	Fearful	Normal	Dogs	R1	A24	4	6	0	1
02-02-06-01-02-02-01.mp4	VO	Song	Fearful	Normal	Dogs	R2	A1	6	6	1	1
02-02-06-01-02-02-02.mp4	VO	Song	Fearful	Normal	Dogs	R2	A2	6	6	1	1
02-02-06-01-02-02-03.mp4	VO	Song	Fearful	Normal	Dogs	R2	A3	4	4	0	0
02-02-06-01-02-02-04.mp4	VO	Song	Fearful	Normal	Dogs	R2	A4	6	6	1	1
02-02-06-01-02-02-05.mp4	VO	Song	Fearful	Normal	Dogs	R2	A5	6	6	1	1
02-02-06-01-02-02-06.mp4	VO	Song	Fearful	Normal	Dogs	R2	A6	4	6	0	1
02-02-06-01-02-02-07.mp4	VO	Song	Fearful	Normal	Dogs	R2	A7	5	6	0	1
02-02-06-01-02-02-08.mp4	VO	Song	Fearful	Normal	Dogs	R2	A8	6	6	1	1
02-02-06-01-02-02-09.mp4	VO	Song	Fearful	Normal	Dogs	R2	A9	6	6	1	1
02-02-06-01-02-02-10.mp4	VO	Song	Fearful	Normal	Dogs	R2	A10	4	4	0	0
02-02-06-01-02-02-11.mp4	VO	Song	Fearful	Normal	Dogs	R2	A11	1	6	0	1
02-02-06-01-02-02-12.mp4	VO	Song	Fearful	Normal	Dogs	R2	A12	6	6	1	1
02-02-06-01-02-02-13.mp4	VO	Song	Fearful	Normal	Dogs	R2	A13	5	5	0	0
02-02-06-01-02-02-14.mp4	VO	Song	Fearful	Normal	Dogs	R2	A14	6	6	1	1
02-02-06-01-02-02-15.mp4	VO	Song	Fearful	Normal	Dogs	R2	A15	6	4	1	0
02-02-06-01-02-02-16.mp4	VO	Song	Fearful	Normal	Dogs	R2	A16	4	4	0	0
02-02-06-01-02-02-17.mp4	VO	Song	Fearful	Normal	Dogs	R2	A17	4	6	0	1
02-02-06-01-02-02-19.mp4	VO	Song	Fearful	Normal	Dogs	R2	A19	4	4	0	0
02-02-06-01-02-02-20.mp4	VO	Song	Fearful	Normal	Dogs	R2	A20	6	6	1	1
02-02-06-01-02-02-21.mp4	VO	Song	Fearful	Normal	Dogs	R2	A21	5	5	0	0
02-02-06-01-02-02-22.mp4	VO	Song	Fearful	Normal	Dogs	R2	A22	4	4	0	0
02-02-06-01-02-02-23.mp4	VO	Song	Fearful	Normal	Dogs	R2	A23	6	6	1	1
02-02-06-01-02-02-24.mp4	VO	Song	Fearful	Normal	Dogs	R2	A24	6	6	1	1
02-02-06-02-01-01-01.mp4	VO	Song	Fearful	Strong	Kids	R1	A1	4	4	0	0
02-02-06-02-01-01-02.mp4	VO	Song	Fearful	Strong	Kids	R1	A2	6	6	1	1
02-02-06-02-01-01-03.mp4	VO	Song	Fearful	Strong	Kids	R1	A3	6	6	1	1
02-02-06-02-01-01-04.mp4	VO	Song	Fearful	Strong	Kids	R1	A4	6	6	1	1
02-02-06-02-01-01-05.mp4	VO	Song	Fearful	Strong	Kids	R1	A5	4	4	0	0
02-02-06-02-01-01-06.mp4	VO	Song	Fearful	Strong	Kids	R1	A6	5	5	0	0
02-02-06-02-01-01-07.mp4	VO	Song	Fearful	Strong	Kids	R1	A7	6	6	1	1
02-02-06-02-01-01-08.mp4	VO	Song	Fearful	Strong	Kids	R1	A8	6	6	1	1
02-02-06-02-01-01-09.mp4	VO	Song	Fearful	Strong	Kids	R1	A9	4	9	0	0
02-02-06-02-01-01-10.mp4	VO	Song	Fearful	Strong	Kids	R1	A10	4	4	0	0
02-02-06-02-01-01-11.mp4	VO	Song	Fearful	Strong	Kids	R1	A11	4	6	0	1
02-02-06-02-01-01-12.mp4	VO	Song	Fearful	Strong	Kids	R1	A12	6	6	1	1
02-02-06-02-01-01-13.mp4	VO	Song	Fearful	Strong	Kids	R1	A13	6	6	1	1
02-02-06-02-01-01-14.mp4	VO	Song	Fearful	Strong	Kids	R1	A14	6	6	1	1
02-02-06-02-01-01-15.mp4	VO	Song	Fearful	Strong	Kids	R1	A15	6	2	1	0
02-02-06-02-01-01-16.mp4	VO	Song	Fearful	Strong	Kids	R1	A16	6	6	1	1
02-02-06-02-01-01-17.mp4	VO	Song	Fearful	Strong	Kids	R1	A17	6	6	1	1
02-02-06-02-01-01-19.mp4	VO	Song	Fearful	Strong	Kids	R1	A19	4	6	0	1
02-02-06-02-01-01-20.mp4	VO	Song	Fearful	Strong	Kids	R1	A20	6	6	1	1
02-02-06-02-01-01-21.mp4	VO	Song	Fearful	Strong	Kids	R1	A21	6	6	1	1
02-02-06-02-01-01-22.mp4	VO	Song	Fearful	Strong	Kids	R1	A22	6	2	1	0
02-02-06-02-01-01-23.mp4	VO	Song	Fearful	Strong	Kids	R1	A23	6	6	1	1
02-02-06-02-01-01-24.mp4	VO	Song	Fearful	Strong	Kids	R1	A24	6	6	1	1
02-02-06-02-01-02-01.mp4	VO	Song	Fearful	Strong	Kids	R2	A1	6	6	1	1
02-02-06-02-01-02-02.mp4	VO	Song	Fearful	Strong	Kids	R2	A2	6	6	1	1
02-02-06-02-01-02-03.mp4	VO	Song	Fearful	Strong	Kids	R2	A3	4	4	0	0
02-02-06-02-01-02-04.mp4	VO	Song	Fearful	Strong	Kids	R2	A4	6	6	1	1
02-02-06-02-01-02-05.mp4	VO	Song	Fearful	Strong	Kids	R2	A5	4	4	0	0
02-02-06-02-01-02-06.mp4	VO	Song	Fearful	Strong	Kids	R2	A6	5	5	0	0
02-02-06-02-01-02-07.mp4	VO	Song	Fearful	Strong	Kids	R2	A7	6	6	1	1
02-02-06-02-01-02-08.mp4	VO	Song	Fearful	Strong	Kids	R2	A8	6	6	1	1
02-02-06-02-01-02-09.mp4	VO	Song	Fearful	Strong	Kids	R2	A9	6	6	1	1
02-02-06-02-01-02-10.mp4	VO	Song	Fearful	Strong	Kids	R2	A10	6	6	1	1
02-02-06-02-01-02-11.mp4	VO	Song	Fearful	Strong	Kids	R2	A11	4	4	0	0
02-02-06-02-01-02-12.mp4	VO	Song	Fearful	Strong	Kids	R2	A12	6	6	1	1
02-02-06-02-01-02-13.mp4	VO	Song	Fearful	Strong	Kids	R2	A13	5	5	0	0
02-02-06-02-01-02-14.mp4	VO	Song	Fearful	Strong	Kids	R2	A14	6	6	1	1
02-02-06-02-01-02-15.mp4	VO	Song	Fearful	Strong	Kids	R2	A15	6	6	1	1
02-02-06-02-01-02-16.mp4	VO	Song	Fearful	Strong	Kids	R2	A16	5	5	0	0
02-02-06-02-01-02-17.mp4	VO	Song	Fearful	Strong	Kids	R2	A17	6	6	1	1
02-02-06-02-01-02-19.mp4	VO	Song	Fearful	Strong	Kids	R2	A19	4	4	0	0
02-02-06-02-01-02-20.mp4	VO	Song	Fearful	Strong	Kids	R2	A20	6	6	1	1
02-02-06-02-01-02-21.mp4	VO	Song	Fearful	Strong	Kids	R2	A21	6	6	1	1
02-02-06-02-01-02-22.mp4	VO	Song	Fearful	Strong	Kids	R2	A22	5	6	0	1
02-02-06-02-01-02-23.mp4	VO	Song	Fearful	Strong	Kids	R2	A23	6	6	1	1
02-02-06-02-01-02-24.mp4	VO	Song	Fearful	Strong	Kids	R2	A24	6	6	1	1
02-02-06-02-02-01-01.mp4	VO	Song	Fearful	Strong	Dogs	R1	A1	4	6	0	1
02-02-06-02-02-01-02.mp4	VO	Song	Fearful	Strong	Dogs	R1	A2	6	4	1	0
02-02-06-02-02-01-03.mp4	VO	Song	Fearful	Strong	Dogs	R1	A3	6	6	1	1
02-02-06-02-02-01-04.mp4	VO	Song	Fearful	Strong	Dogs	R1	A4	6	6	1	1
02-02-06-02-02-01-05.mp4	VO	Song	Fearful	Strong	Dogs	R1	A5	6	6	1	1
02-02-06-02-02-01-06.mp4	VO	Song	Fearful	Strong	Dogs	R1	A6	4	5	0	0
02-02-06-02-02-01-07.mp4	VO	Song	Fearful	Strong	Dogs	R1	A7	6	6	1	1
02-02-06-02-02-01-08.mp4	VO	Song	Fearful	Strong	Dogs	R1	A8	6	6	1	1
02-02-06-02-02-01-09.mp4	VO	Song	Fearful	Strong	Dogs	R1	A9	6	6	1	1
02-02-06-02-02-01-10.mp4	VO	Song	Fearful	Strong	Dogs	R1	A10	6	6	1	1
02-02-06-02-02-01-11.mp4	VO	Song	Fearful	Strong	Dogs	R1	A11	6	6	1	1
02-02-06-02-02-01-12.mp4	VO	Song	Fearful	Strong	Dogs	R1	A12	6	6	1	1
02-02-06-02-02-01-13.mp4	VO	Song	Fearful	Strong	Dogs	R1	A13	6	6	1	1
02-02-06-02-02-01-14.mp4	VO	Song	Fearful	Strong	Dogs	R1	A14	6	6	1	1
02-02-06-02-02-01-15.mp4	VO	Song	Fearful	Strong	Dogs	R1	A15	4	6	0	1
02-02-06-02-02-01-16.mp4	VO	Song	Fearful	Strong	Dogs	R1	A16	6	6	1	1
02-02-06-02-02-01-17.mp4	VO	Song	Fearful	Strong	Dogs	R1	A17	6	6	1	1
02-02-06-02-02-01-19.mp4	VO	Song	Fearful	Strong	Dogs	R1	A19	6	4	1	0
02-02-06-02-02-01-20.mp4	VO	Song	Fearful	Strong	Dogs	R1	A20	6	6	1	1
02-02-06-02-02-01-21.mp4	VO	Song	Fearful	Strong	Dogs	R1	A21	5	9	0	0
[truncated: 1,038 more rows]
