# Supplementary material for: The Ryerson Audio-Visual Database of Emotional Speech and Song (RAVDESS): A dynamic, multimodal set of facial and vocal expressions in North American English
Source: PLoS One. 2018 May 16;13(5):e0196391. doi: 10.1371/journal.pone.0196391 (PMC5955500; doi:10.1371/journal.pone.0196391)
Supplement: S5 Table — Raw response data from the validity task for all 7356 stimuli. Includes rater identified emotional category (neutral 1, calm 2, happy 3, sad 4, angry 5, fearful 6, surprise 7, disgust 8, none 9), coded raw accuracy (incorrect 0, correct 1), emotional intensity (very weak 1, to very strong 5), and emotional genuineness (not genuine 1, to very genuine 5). (XLSX) [file pone.0196391.s008.xlsx]

## Sheet: Speech_RawAccuracy
	Independent Variables														Dependent Variables
	IV Factor level strings							IV Factor level IDs							DV Individual ratings
Filename	Modality	Channel	Emotion	Intensity	Statement	Repetition	Actor	ModalityID	ChannelID	EmotionID	IntensityID	StatementID	RepetitionID	ActorID	R1	R2	R3	R4	R5	R6	R7	R8	R9	R10
01-01-01-01-01-01-01.mp4	AV	Speech	Neutral	Normal	Kids	R1	A1	1	1	1	1	1	1	1	0	1	1	1	1	1	1	1	1	1
01-01-01-01-01-01-02.mp4	AV	Speech	Neutral	Normal	Kids	R1	A2	1	1	1	1	1	1	2	1	0	1	1	1	1	1	1	1	1
01-01-01-01-01-01-03.mp4	AV	Speech	Neutral	Normal	Kids	R1	A3	1	1	1	1	1	1	3	1	1	1	1	1	1	1	1	1	1
01-01-01-01-01-01-04.mp4	AV	Speech	Neutral	Normal	Kids	R1	A4	1	1	1	1	1	1	4	1	1	1	1	1	1	1	1	1	1
01-01-01-01-01-01-05.mp4	AV	Speech	Neutral	Normal	Kids	R1	A5	1	1	1	1	1	1	5	1	1	1	1	1	1	1	1	1	1
01-01-01-01-01-01-06.mp4	AV	Speech	Neutral	Normal	Kids	R1	A6	1	1	1	1	1	1	6	1	1	1	0	1	1	1	1	1	0
01-01-01-01-01-01-07.mp4	AV	Speech	Neutral	Normal	Kids	R1	A7	1	1	1	1	1	1	7	1	1	1	1	1	0	1	1	1	1
01-01-01-01-01-01-08.mp4	AV	Speech	Neutral	Normal	Kids	R1	A8	1	1	1	1	1	1	8	1	1	1	1	1	1	1	1	1	0
01-01-01-01-01-01-09.mp4	AV	Speech	Neutral	Normal	Kids	R1	A9	1	1	1	1	1	1	9	1	1	1	1	1	1	0	1	1	1
01-01-01-01-01-01-10.mp4	AV	Speech	Neutral	Normal	Kids	R1	A10	1	1	1	1	1	1	10	0	1	1	1	1	1	1	1	0	1
01-01-01-01-01-01-11.mp4	AV	Speech	Neutral	Normal	Kids	R1	A11	1	1	1	1	1	1	11	1	1	1	1	0	1	1	1	1	1
01-01-01-01-01-01-12.mp4	AV	Speech	Neutral	Normal	Kids	R1	A12	1	1	1	1	1	1	12	1	1	1	1	1	1	1	1	1	1
01-01-01-01-01-01-13.mp4	AV	Speech	Neutral	Normal	Kids	R1	A13	1	1	1	1	1	1	13	1	1	1	1	1	1	1	1	1	1
01-01-01-01-01-01-14.mp4	AV	Speech	Neutral	Normal	Kids	R1	A14	1	1	1	1	1	1	14	1	0	1	1	1	0	1	0	1	1
01-01-01-01-01-01-15.mp4	AV	Speech	Neutral	Normal	Kids	R1	A15	1	1	1	1	1	1	15	1	1	1	1	1	1	1	1	1	0
01-01-01-01-01-01-16.mp4	AV	Speech	Neutral	Normal	Kids	R1	A16	1	1	1	1	1	1	16	1	0	0	1	1	1	1	1	1	0
01-01-01-01-01-01-17.mp4	AV	Speech	Neutral	Normal	Kids	R1	A17	1	1	1	1	1	1	17	1	1	0	1	0	1	1	1	1	1
01-01-01-01-01-01-18.mp4	AV	Speech	Neutral	Normal	Kids	R1	A18	1	1	1	1	1	1	18	1	1	1	0	1	1	0	1	1	0
01-01-01-01-01-01-19.mp4	AV	Speech	Neutral	Normal	Kids	R1	A19	1	1	1	1	1	1	19	1	1	1	1	1	1	1	1	1	1
01-01-01-01-01-01-20.mp4	AV	Speech	Neutral	Normal	Kids	R1	A20	1	1	1	1	1	1	20	0	1	1	1	1	1	1	1	0	0
01-01-01-01-01-01-21.mp4	AV	Speech	Neutral	Normal	Kids	R1	A21	1	1	1	1	1	1	21	1	1	1	0	1	0	1	1	1	1
01-01-01-01-01-01-22.mp4	AV	Speech	Neutral	Normal	Kids	R1	A22	1	1	1	1	1	1	22	0	1	1	1	0	1	1	0	1	1
01-01-01-01-01-01-23.mp4	AV	Speech	Neutral	Normal	Kids	R1	A23	1	1	1	1	1	1	23	1	1	1	1	1	1	1	1	1	1
01-01-01-01-01-01-24.mp4	AV	Speech	Neutral	Normal	Kids	R1	A24	1	1	1	1	1	1	24	1	0	1	1	1	1	1	1	1	1
01-01-01-01-01-02-01.mp4	AV	Speech	Neutral	Normal	Kids	R2	A1	1	1	1	1	1	2	1	1	1	1	1	1	1	1	1	1	1
01-01-01-01-01-02-02.mp4	AV	Speech	Neutral	Normal	Kids	R2	A2	1	1	1	1	1	2	2	1	1	1	1	1	0	1	1	1	1
01-01-01-01-01-02-03.mp4	AV	Speech	Neutral	Normal	Kids	R2	A3	1	1	1	1	1	2	3	1	1	1	1	1	0	1	1	1	1
01-01-01-01-01-02-04.mp4	AV	Speech	Neutral	Normal	Kids	R2	A4	1	1	1	1	1	2	4	1	1	1	1	1	1	1	1	1	1
01-01-01-01-01-02-05.mp4	AV	Speech	Neutral	Normal	Kids	R2	A5	1	1	1	1	1	2	5	1	1	1	0	1	1	1	1	1	1
01-01-01-01-01-02-06.mp4	AV	Speech	Neutral	Normal	Kids	R2	A6	1	1	1	1	1	2	6	1	1	1	1	1	1	1	1	0	1
01-01-01-01-01-02-07.mp4	AV	Speech	Neutral	Normal	Kids	R2	A7	1	1	1	1	1	2	7	0	1	1	1	1	0	1	1	1	1
01-01-01-01-01-02-08.mp4	AV	Speech	Neutral	Normal	Kids	R2	A8	1	1	1	1	1	2	8	1	1	1	1	1	1	1	1	1	1
01-01-01-01-01-02-09.mp4	AV	Speech	Neutral	Normal	Kids	R2	A9	1	1	1	1	1	2	9	0	1	0	1	1	0	1	1	1	1
01-01-01-01-01-02-10.mp4	AV	Speech	Neutral	Normal	Kids	R2	A10	1	1	1	1	1	2	10	1	0	1	1	1	1	1	1	1	1
01-01-01-01-01-02-11.mp4	AV	Speech	Neutral	Normal	Kids	R2	A11	1	1	1	1	1	2	11	1	1	1	1	1	1	0	1	1	1
01-01-01-01-01-02-12.mp4	AV	Speech	Neutral	Normal	Kids	R2	A12	1	1	1	1	1	2	12	1	1	1	1	1	1	1	1	1	1
01-01-01-01-01-02-13.mp4	AV	Speech	Neutral	Normal	Kids	R2	A13	1	1	1	1	1	2	13	1	1	1	1	1	1	1	1	1	1
01-01-01-01-01-02-14.mp4	AV	Speech	Neutral	Normal	Kids	R2	A14	1	1	1	1	1	2	14	1	0	0	1	0	1	0	1	1	1
01-01-01-01-01-02-15.mp4	AV	Speech	Neutral	Normal	Kids	R2	A15	1	1	1	1	1	2	15	0	0	1	1	1	1	1	1	1	1
01-01-01-01-01-02-16.mp4	AV	Speech	Neutral	Normal	Kids	R2	A16	1	1	1	1	1	2	16	0	1	1	0	1	1	1	1	1	0
01-01-01-01-01-02-17.mp4	AV	Speech	Neutral	Normal	Kids	R2	A17	1	1	1	1	1	2	17	1	1	1	1	0	1	0	1	1	1
01-01-01-01-01-02-18.mp4	AV	Speech	Neutral	Normal	Kids	R2	A18	1	1	1	1	1	2	18	1	1	1	1	1	1	1	1	1	1
01-01-01-01-01-02-19.mp4	AV	Speech	Neutral	Normal	Kids	R2	A19	1	1	1	1	1	2	19	1	1	1	1	0	1	1	0	1	1
01-01-01-01-01-02-20.mp4	AV	Speech	Neutral	Normal	Kids	R2	A20	1	1	1	1	1	2	20	1	1	1	1	1	1	1	1	1	1
01-01-01-01-01-02-21.mp4	AV	Speech	Neutral	Normal	Kids	R2	A21	1	1	1	1	1	2	21	1	0	1	1	1	1	1	1	1	0
01-01-01-01-01-02-22.mp4	AV	Speech	Neutral	Normal	Kids	R2	A22	1	1	1	1	1	2	22	1	1	1	1	1	1	1	1	1	1
01-01-01-01-01-02-23.mp4	AV	Speech	Neutral	Normal	Kids	R2	A23	1	1	1	1	1	2	23	1	1	1	1	1	1	1	1	1	1
01-01-01-01-01-02-24.mp4	AV	Speech	Neutral	Normal	Kids	R2	A24	1	1	1	1	1	2	24	1	1	1	1	1	1	0	1	1	0
01-01-01-01-02-01-01.mp4	AV	Speech	Neutral	Normal	Dogs	R1	A1	1	1	1	1	2	1	1	1	1	1	1	1	1	1	1	1	1
01-01-01-01-02-01-02.mp4	AV	Speech	Neutral	Normal	Dogs	R1	A2	1	1	1	1	2	1	2	1	1	1	1	1	0	1	1	1	1
01-01-01-01-02-01-03.mp4	AV	Speech	Neutral	Normal	Dogs	R1	A3	1	1	1	1	2	1	3	1	1	0	1	0	1	0	0	1	0
01-01-01-01-02-01-04.mp4	AV	Speech	Neutral	Normal	Dogs	R1	A4	1	1	1	1	2	1	4	1	1	1	1	1	1	1	1	1	1
01-01-01-01-02-01-05.mp4	AV	Speech	Neutral	Normal	Dogs	R1	A5	1	1	1	1	2	1	5	1	1	1	1	1	1	1	1	1	1
01-01-01-01-02-01-06.mp4	AV	Speech	Neutral	Normal	Dogs	R1	A6	1	1	1	1	2	1	6	1	1	1	1	1	1	0	1	1	1
01-01-01-01-02-01-07.mp4	AV	Speech	Neutral	Normal	Dogs	R1	A7	1	1	1	1	2	1	7	0	1	1	1	0	1	1	1	1	1
01-01-01-01-02-01-08.mp4	AV	Speech	Neutral	Normal	Dogs	R1	A8	1	1	1	1	2	1	8	1	1	1	1	0	1	1	1	1	1
01-01-01-01-02-01-09.mp4	AV	Speech	Neutral	Normal	Dogs	R1	A9	1	1	1	1	2	1	9	1	0	1	1	1	1	1	1	1	1
01-01-01-01-02-01-10.mp4	AV	Speech	Neutral	Normal	Dogs	R1	A10	1	1	1	1	2	1	10	1	1	1	0	1	1	1	1	1	1
01-01-01-01-02-01-11.mp4	AV	Speech	Neutral	Normal	Dogs	R1	A11	1	1	1	1	2	1	11	1	1	1	1	1	1	1	1	1	1
01-01-01-01-02-01-12.mp4	AV	Speech	Neutral	Normal	Dogs	R1	A12	1	1	1	1	2	1	12	1	1	1	1	1	1	1	1	1	1
01-01-01-01-02-01-13.mp4	AV	Speech	Neutral	Normal	Dogs	R1	A13	1	1	1	1	2	1	13	1	1	1	1	1	1	0	1	1	1
01-01-01-01-02-01-14.mp4	AV	Speech	Neutral	Normal	Dogs	R1	A14	1	1	1	1	2	1	14	1	1	1	0	1	1	0	0	0	1
01-01-01-01-02-01-15.mp4	AV	Speech	Neutral	Normal	Dogs	R1	A15	1	1	1	1	2	1	15	1	1	1	1	1	1	1	1	1	1
01-01-01-01-02-01-16.mp4	AV	Speech	Neutral	Normal	Dogs	R1	A16	1	1	1	1	2	1	16	1	1	1	0	1	1	0	0	1	1
01-01-01-01-02-01-17.mp4	AV	Speech	Neutral	Normal	Dogs	R1	A17	1	1	1	1	2	1	17	1	1	1	1	1	1	0	1	1	1
01-01-01-01-02-01-18.mp4	AV	Speech	Neutral	Normal	Dogs	R1	A18	1	1	1	1	2	1	18	1	0	1	1	1	1	0	0	1	0
01-01-01-01-02-01-19.mp4	AV	Speech	Neutral	Normal	Dogs	R1	A19	1	1	1	1	2	1	19	1	0	0	0	1	1	0	1	1	1
01-01-01-01-02-01-20.mp4	AV	Speech	Neutral	Normal	Dogs	R1	A20	1	1	1	1	2	1	20	1	1	1	1	1	1	1	1	1	1
01-01-01-01-02-01-21.mp4	AV	Speech	Neutral	Normal	Dogs	R1	A21	1	1	1	1	2	1	21	1	1	1	1	1	1	1	1	1	1
01-01-01-01-02-01-22.mp4	AV	Speech	Neutral	Normal	Dogs	R1	A22	1	1	1	1	2	1	22	1	1	1	1	1	1	1	1	1	1
01-01-01-01-02-01-23.mp4	AV	Speech	Neutral	Normal	Dogs	R1	A23	1	1	1	1	2	1	23	1	1	1	1	1	1	1	1	1	1
01-01-01-01-02-01-24.mp4	AV	Speech	Neutral	Normal	Dogs	R1	A24	1	1	1	1	2	1	24	1	1	1	1	1	1	1	1	1	0
01-01-01-01-02-02-01.mp4	AV	Speech	Neutral	Normal	Dogs	R2	A1	1	1	1	1	2	2	1	1	1	1	1	1	0	1	0	1	0
01-01-01-01-02-02-02.mp4	AV	Speech	Neutral	Normal	Dogs	R2	A2	1	1	1	1	2	2	2	0	1	1	1	1	1	1	1	1	1
01-01-01-01-02-02-03.mp4	AV	Speech	Neutral	Normal	Dogs	R2	A3	1	1	1	1	2	2	3	1	1	1	1	1	1	0	0	0	0
01-01-01-01-02-02-04.mp4	AV	Speech	Neutral	Normal	Dogs	R2	A4	1	1	1	1	2	2	4	0	1	1	1	1	1	1	1	1	0
01-01-01-01-02-02-05.mp4	AV	Speech	Neutral	Normal	Dogs	R2	A5	1	1	1	1	2	2	5	1	1	1	1	1	0	1	1	1	1
01-01-01-01-02-02-06.mp4	AV	Speech	Neutral	Normal	Dogs	R2	A6	1	1	1	1	2	2	6	1	1	1	1	1	1	1	1	1	1
01-01-01-01-02-02-07.mp4	AV	Speech	Neutral	Normal	Dogs	R2	A7	1	1	1	1	2	2	7	1	1	1	1	1	1	1	1	1	1
01-01-01-01-02-02-08.mp4	AV	Speech	Neutral	Normal	Dogs	R2	A8	1	1	1	1	2	2	8	1	1	1	1	1	1	1	1	1	1
01-01-01-01-02-02-09.mp4	AV	Speech	Neutral	Normal	Dogs	R2	A9	1	1	1	1	2	2	9	0	1	1	1	1	1	1	1	1	1
01-01-01-01-02-02-10.mp4	AV	Speech	Neutral	Normal	Dogs	R2	A10	1	1	1	1	2	2	10	1	1	1	1	1	1	1	1	1	1
01-01-01-01-02-02-11.mp4	AV	Speech	Neutral	Normal	Dogs	R2	A11	1	1	1	1	2	2	11	1	1	1	1	1	1	1	1	1	1
01-01-01-01-02-02-12.mp4	AV	Speech	Neutral	Normal	Dogs	R2	A12	1	1	1	1	2	2	12	1	1	1	1	1	1	0	1	1	1
01-01-01-01-02-02-13.mp4	AV	Speech	Neutral	Normal	Dogs	R2	A13	1	1	1	1	2	2	13	1	1	1	1	1	1	1	1	1	1
01-01-01-01-02-02-14.mp4	AV	Speech	Neutral	Normal	Dogs	R2	A14	1	1	1	1	2	2	14	1	0	1	1	0	0	1	1	1	1
01-01-01-01-02-02-15.mp4	AV	Speech	Neutral	Normal	Dogs	R2	A15	1	1	1	1	2	2	15	0	1	1	1	1	1	1	1	1	1
01-01-01-01-02-02-16.mp4	AV	Speech	Neutral	Normal	Dogs	R2	A16	1	1	1	1	2	2	16	0	1	0	1	1	1	1	1	1	1
01-01-01-01-02-02-17.mp4	AV	Speech	Neutral	Normal	Dogs	R2	A17	1	1	1	1	2	2	17	1	1	1	1	1	1	1	1	0	1
01-01-01-01-02-02-18.mp4	AV	Speech	Neutral	Normal	Dogs	R2	A18	1	1	1	1	2	2	18	1	1	1	1	1	1	1	1	1	1
01-01-01-01-02-02-19.mp4	AV	Speech	Neutral	Normal	Dogs	R2	A19	1	1	1	1	2	2	19	1	1	1	1	1	1	1	0	1	1
01-01-01-01-02-02-20.mp4	AV	Speech	Neutral	Normal	Dogs	R2	A20	1	1	1	1	2	2	20	1	1	1	1	1	1	1	1	1	1
01-01-01-01-02-02-21.mp4	AV	Speech	Neutral	Normal	Dogs	R2	A21	1	1	1	1	2	2	21	1	1	0	1	1	1	1	1	0	1
01-01-01-01-02-02-22.mp4	AV	Speech	Neutral	Normal	Dogs	R2	A22	1	1	1	1	2	2	22	1	1	1	1	1	1	0	1	1	1
01-01-01-01-02-02-23.mp4	AV	Speech	Neutral	Normal	Dogs	R2	A23	1	1	1	1	2	2	23	1	1	1	1	1	1	1	1	1	0
01-01-01-01-02-02-24.mp4	AV	Speech	Neutral	Normal	Dogs	R2	A24	1	1	1	1	2	2	24	1	1	1	1	1	1	1	1	1	0
01-01-02-01-01-01-01.mp4	AV	Speech	Calm	Normal	Kids	R1	A1	1	1	2	1	1	1	1	1	1	1	1	0	0	1	1	1	1
01-01-02-01-01-01-02.mp4	AV	Speech	Calm	Normal	Kids	R1	A2	1	1	2	1	1	1	2	1	1	1	1	1	1	1	1	1	1
01-01-02-01-01-01-03.mp4	AV	Speech	Calm	Normal	Kids	R1	A3	1	1	2	1	1	1	3	1	1	1	0	1	1	0	1	1	0
01-01-02-01-01-01-04.mp4	AV	Speech	Calm	Normal	Kids	R1	A4	1	1	2	1	1	1	4	1	1	0	0	0	1	1	0	0	1
01-01-02-01-01-01-05.mp4	AV	Speech	Calm	Normal	Kids	R1	A5	1	1	2	1	1	1	5	0	0	0	0	0	0	0	0	0	0
01-01-02-01-01-01-06.mp4	AV	Speech	Calm	Normal	Kids	R1	A6	1	1	2	1	1	1	6	1	1	0	1	1	1	1	1	1	1
01-01-02-01-01-01-07.mp4	AV	Speech	Calm	Normal	Kids	R1	A7	1	1	2	1	1	1	7	1	1	1	0	1	0	1	1	1	1
01-01-02-01-01-01-08.mp4	AV	Speech	Calm	Normal	Kids	R1	A8	1	1	2	1	1	1	8	1	1	1	1	1	1	1	1	1	1
01-01-02-01-01-01-09.mp4	AV	Speech	Calm	Normal	Kids	R1	A9	1	1	2	1	1	1	9	0	0	1	1	1	1	1	1	0	1
01-01-02-01-01-01-10.mp4	AV	Speech	Calm	Normal	Kids	R1	A10	1	1	2	1	1	1	10	0	1	0	0	1	1	0	0	0	0
01-01-02-01-01-01-11.mp4	AV	Speech	Calm	Normal	Kids	R1	A11	1	1	2	1	1	1	11	1	1	1	1	1	1	1	1	1	1
01-01-02-01-01-01-12.mp4	AV	Speech	Calm	Normal	Kids	R1	A12	1	1	2	1	1	1	12	1	1	1	1	1	1	1	1	1	1
01-01-02-01-01-01-13.mp4	AV	Speech	Calm	Normal	Kids	R1	A13	1	1	2	1	1	1	13	1	0	1	1	1	1	1	0	1	1
01-01-02-01-01-01-14.mp4	AV	Speech	Calm	Normal	Kids	R1	A14	1	1	2	1	1	1	14	0	0	1	0	1	1	1	1	1	1
01-01-02-01-01-01-15.mp4	AV	Speech	Calm	Normal	Kids	R1	A15	1	1	2	1	1	1	15	1	1	1	1	1	1	1	1	1	1
01-01-02-01-01-01-16.mp4	AV	Speech	Calm	Normal	Kids	R1	A16	1	1	2	1	1	1	16	0	1	0	0	0	0	1	1	1	0
01-01-02-01-01-01-17.mp4	AV	Speech	Calm	Normal	Kids	R1	A17	1	1	2	1	1	1	17	1	0	1	1	1	1	1	1	0	1
01-01-02-01-01-01-18.mp4	AV	Speech	Calm	Normal	Kids	R1	A18	1	1	2	1	1	1	18	0	0	1	1	1	1	0	0	1	1
01-01-02-01-01-01-19.mp4	AV	Speech	Calm	Normal	Kids	R1	A19	1	1	2	1	1	1	19	1	1	0	0	0	0	0	1	0	0
01-01-02-01-01-01-20.mp4	AV	Speech	Calm	Normal	Kids	R1	A20	1	1	2	1	1	1	20	0	1	1	1	1	1	0	1	1	1
01-01-02-01-01-01-21.mp4	AV	Speech	Calm	Normal	Kids	R1	A21	1	1	2	1	1	1	21	1	1	1	1	0	1	0	0	1	0
01-01-02-01-01-01-22.mp4	AV	Speech	Calm	Normal	Kids	R1	A22	1	1	2	1	1	1	22	1	1	1	1	1	1	1	1	1	1
01-01-02-01-01-01-23.mp4	AV	Speech	Calm	Normal	Kids	R1	A23	1	1	2	1	1	1	23	1	1	1	1	1	1	1	1	1	1
01-01-02-01-01-01-24.mp4	AV	Speech	Calm	Normal	Kids	R1	A24	1	1	2	1	1	1	24	1	1	1	1	1	1	1	1	1	1
01-01-02-01-01-02-01.mp4	AV	Speech	Calm	Normal	Kids	R2	A1	1	1	2	1	1	2	1	1	1	1	1	1	1	1	1	1	1
01-01-02-01-01-02-02.mp4	AV	Speech	Calm	Normal	Kids	R2	A2	1	1	2	1	1	2	2	1	1	1	1	0	1	1	1	1	1
01-01-02-01-01-02-03.mp4	AV	Speech	Calm	Normal	Kids	R2	A3	1	1	2	1	1	2	3	0	0	0	0	1	0	0	0	0	1
01-01-02-01-01-02-04.mp4	AV	Speech	Calm	Normal	Kids	R2	A4	1	1	2	1	1	2	4	0	0	0	0	0	0	0	0	0	0
01-01-02-01-01-02-05.mp4	AV	Speech	Calm	Normal	Kids	R2	A5	1	1	2	1	1	2	5	0	1	1	1	0	1	1	1	0	1
01-01-02-01-01-02-06.mp4	AV	Speech	Calm	Normal	Kids	R2	A6	1	1	2	1	1	2	6	1	1	1	1	1	1	1	1	0	1
01-01-02-01-01-02-07.mp4	AV	Speech	Calm	Normal	Kids	R2	A7	1	1	2	1	1	2	7	1	0	1	0	1	1	1	1	0	1
01-01-02-01-01-02-08.mp4	AV	Speech	Calm	Normal	Kids	R2	A8	1	1	2	1	1	2	8	1	1	0	0	0	1	0	1	1	1
01-01-02-01-01-02-09.mp4	AV	Speech	Calm	Normal	Kids	R2	A9	1	1	2	1	1	2	9	1	1	1	1	1	1	0	1	1	1
01-01-02-01-01-02-10.mp4	AV	Speech	Calm	Normal	Kids	R2	A10	1	1	2	1	1	2	10	1	1	0	1	0	1	1	0	1	1
01-01-02-01-01-02-11.mp4	AV	Speech	Calm	Normal	Kids	R2	A11	1	1	2	1	1	2	11	0	1	1	0	1	1	0	1	1	1
01-01-02-01-01-02-12.mp4	AV	Speech	Calm	Normal	Kids	R2	A12	1	1	2	1	1	2	12	1	1	1	0	1	1	1	1	1	0
01-01-02-01-01-02-13.mp4	AV	Speech	Calm	Normal	Kids	R2	A13	1	1	2	1	1	2	13	0	1	1	1	1	1	1	1	0	1
01-01-02-01-01-02-14.mp4	AV	Speech	Calm	Normal	Kids	R2	A14	1	1	2	1	1	2	14	1	1	1	1	0	0	1	1	1	1
01-01-02-01-01-02-15.mp4	AV	Speech	Calm	Normal	Kids	R2	A15	1	1	2	1	1	2	15	0	1	1	1	0	1	1	1	0	1
01-01-02-01-01-02-16.mp4	AV	Speech	Calm	Normal	Kids	R2	A16	1	1	2	1	1	2	16	0	1	0	1	0	1	1	0	0	1
01-01-02-01-01-02-17.mp4	AV	Speech	Calm	Normal	Kids	R2	A17	1	1	2	1	1	2	17	1	1	1	1	0	1	1	1	1	1
01-01-02-01-01-02-18.mp4	AV	Speech	Calm	Normal	Kids	R2	A18	1	1	2	1	1	2	18	1	1	1	1	1	1	1	0	1	0
01-01-02-01-01-02-19.mp4	AV	Speech	Calm	Normal	Kids	R2	A19	1	1	2	1	1	2	19	1	1	1	0	0	0	1	0	0	0
01-01-02-01-01-02-20.mp4	AV	Speech	Calm	Normal	Kids	R2	A20	1	1	2	1	1	2	20	1	0	0	1	1	1	0	1	0	1
01-01-02-01-01-02-21.mp4	AV	Speech	Calm	Normal	Kids	R2	A21	1	1	2	1	1	2	21	1	1	1	1	1	1	1	1	1	1
01-01-02-01-01-02-22.mp4	AV	Speech	Calm	Normal	Kids	R2	A22	1	1	2	1	1	2	22	1	1	1	1	1	1	1	1	1	1
01-01-02-01-01-02-23.mp4	AV	Speech	Calm	Normal	Kids	R2	A23	1	1	2	1	1	2	23	1	1	1	1	1	1	1	1	1	1
01-01-02-01-01-02-24.mp4	AV	Speech	Calm	Normal	Kids	R2	A24	1	1	2	1	1	2	24	0	1	0	1	0	1	0	1	0	0
01-01-02-01-02-01-01.mp4	AV	Speech	Calm	Normal	Dogs	R1	A1	1	1	2	1	2	1	1	1	1	1	1	1	1	0	0	1	1
01-01-02-01-02-01-02.mp4	AV	Speech	Calm	Normal	Dogs	R1	A2	1	1	2	1	2	1	2	1	1	1	1	1	0	1	1	1	1
01-01-02-01-02-01-03.mp4	AV	Speech	Calm	Normal	Dogs	R1	A3	1	1	2	1	2	1	3	1	0	0	0	0	0	1	0	1	1
01-01-02-01-02-01-04.mp4	AV	Speech	Calm	Normal	Dogs	R1	A4	1	1	2	1	2	1	4	0	0	1	1	0	0	0	1	0	0
01-01-02-01-02-01-05.mp4	AV	Speech	Calm	Normal	Dogs	R1	A5	1	1	2	1	2	1	5	1	0	1	1	1	0	1	1	0	0
01-01-02-01-02-01-06.mp4	AV	Speech	Calm	Normal	Dogs	R1	A6	1	1	2	1	2	1	6	1	1	1	1	1	1	1	1	1	0
01-01-02-01-02-01-07.mp4	AV	Speech	Calm	Normal	Dogs	R1	A7	1	1	2	1	2	1	7	1	1	1	1	1	1	1	0	1	0
01-01-02-01-02-01-08.mp4	AV	Speech	Calm	Normal	Dogs	R1	A8	1	1	2	1	2	1	8	0	1	1	0	1	1	1	0	1	0
01-01-02-01-02-01-09.mp4	AV	Speech	Calm	Normal	Dogs	R1	A9	1	1	2	1	2	1	9	1	1	1	1	1	1	1	1	1	1
01-01-02-01-02-01-10.mp4	AV	Speech	Calm	Normal	Dogs	R1	A10	1	1	2	1	2	1	10	0	0	1	1	0	1	1	0	1	0
01-01-02-01-02-01-11.mp4	AV	Speech	Calm	Normal	Dogs	R1	A11	1	1	2	1	2	1	11	1	1	1	0	1	0	1	1	1	1
01-01-02-01-02-01-12.mp4	AV	Speech	Calm	Normal	Dogs	R1	A12	1	1	2	1	2	1	12	1	0	0	1	1	1	1	0	1	1
01-01-02-01-02-01-13.mp4	AV	Speech	Calm	Normal	Dogs	R1	A13	1	1	2	1	2	1	13	1	1	0	0	1	1	1	1	0	1
01-01-02-01-02-01-14.mp4	AV	Speech	Calm	Normal	Dogs	R1	A14	1	1	2	1	2	1	14	1	0	1	1	0	1	1	1	1	1
01-01-02-01-02-01-15.mp4	AV	Speech	Calm	Normal	Dogs	R1	A15	1	1	2	1	2	1	15	1	1	1	1	1	1	1	1	0	1
01-01-02-01-02-01-16.mp4	AV	Speech	Calm	Normal	Dogs	R1	A16	1	1	2	1	2	1	16	1	0	0	0	1	1	1	0	1	1
01-01-02-01-02-01-17.mp4	AV	Speech	Calm	Normal	Dogs	R1	A17	1	1	2	1	2	1	17	1	1	1	1	0	1	1	1	1	1
01-01-02-01-02-01-18.mp4	AV	Speech	Calm	Normal	Dogs	R1	A18	1	1	2	1	2	1	18	0	1	0	0	1	1	0	0	1	1
01-01-02-01-02-01-19.mp4	AV	Speech	Calm	Normal	Dogs	R1	A19	1	1	2	1	2	1	19	0	1	1	1	1	0	0	1	0	0
01-01-02-01-02-01-20.mp4	AV	Speech	Calm	Normal	Dogs	R1	A20	1	1	2	1	2	1	20	1	1	1	1	1	0	1	1	0	1
01-01-02-01-02-01-21.mp4	AV	Speech	Calm	Normal	Dogs	R1	A21	1	1	2	1	2	1	21	0	1	1	0	1	1	1	1	1	1
01-01-02-01-02-01-22.mp4	AV	Speech	Calm	Normal	Dogs	R1	A22	1	1	2	1	2	1	22	0	1	0	1	1	0	1	1	1	1
01-01-02-01-02-01-23.mp4	AV	Speech	Calm	Normal	Dogs	R1	A23	1	1	2	1	2	1	23	1	1	1	1	1	1	1	1	1	1
01-01-02-01-02-01-24.mp4	AV	Speech	Calm	Normal	Dogs	R1	A24	1	1	2	1	2	1	24	1	1	1	0	1	1	1	1	0	1
01-01-02-01-02-02-01.mp4	AV	Speech	Calm	Normal	Dogs	R2	A1	1	1	2	1	2	2	1	1	1	1	1	1	1	1	1	1	1
01-01-02-01-02-02-02.mp4	AV	Speech	Calm	Normal	Dogs	R2	A2	1	1	2	1	2	2	2	0	1	1	1	1	1	1	1	1	1
01-01-02-01-02-02-03.mp4	AV	Speech	Calm	Normal	Dogs	R2	A3	1	1	2	1	2	2	3	1	0	0	0	1	0	1	1	0	0
01-01-02-01-02-02-04.mp4	AV	Speech	Calm	Normal	Dogs	R2	A4	1	1	2	1	2	2	4	0	0	1	0	1	0	1	0	0	0
01-01-02-01-02-02-05.mp4	AV	Speech	Calm	Normal	Dogs	R2	A5	1	1	2	1	2	2	5	1	0	1	1	1	0	0	0	0	1
01-01-02-01-02-02-06.mp4	AV	Speech	Calm	Normal	Dogs	R2	A6	1	1	2	1	2	2	6	1	1	1	1	1	1	1	1	1	1
01-01-02-01-02-02-07.mp4	AV	Speech	Calm	Normal	Dogs	R2	A7	1	1	2	1	2	2	7	0	1	1	1	1	1	0	1	1	1
01-01-02-01-02-02-08.mp4	AV	Speech	Calm	Normal	Dogs	R2	A8	1	1	2	1	2	2	8	1	1	0	1	1	0	1	1	0	1
01-01-02-01-02-02-09.mp4	AV	Speech	Calm	Normal	Dogs	R2	A9	1	1	2	1	2	2	9	1	0	0	1	1	1	1	1	1	1
01-01-02-01-02-02-10.mp4	AV	Speech	Calm	Normal	Dogs	R2	A10	1	1	2	1	2	2	10	1	1	1	1	1	1	1	1	1	0
01-01-02-01-02-02-11.mp4	AV	Speech	Calm	Normal	Dogs	R2	A11	1	1	2	1	2	2	11	1	1	1	1	1	1	1	1	1	1
01-01-02-01-02-02-12.mp4	AV	Speech	Calm	Normal	Dogs	R2	A12	1	1	2	1	2	2	12	0	1	1	1	1	0	1	1	0	1
01-01-02-01-02-02-13.mp4	AV	Speech	Calm	Normal	Dogs	R2	A13	1	1	2	1	2	2	13	1	1	1	1	1	1	0	1	0	1
01-01-02-01-02-02-14.mp4	AV	Speech	Calm	Normal	Dogs	R2	A14	1	1	2	1	2	2	14	0	1	1	1	0	1	1	1	1	1
01-01-02-01-02-02-15.mp4	AV	Speech	Calm	Normal	Dogs	R2	A15	1	1	2	1	2	2	15	1	1	1	0	1	1	1	1	1	1
01-01-02-01-02-02-16.mp4	AV	Speech	Calm	Normal	Dogs	R2	A16	1	1	2	1	2	2	16	0	0	1	1	1	0	1	1	0	0
01-01-02-01-02-02-17.mp4	AV	Speech	Calm	Normal	Dogs	R2	A17	1	1	2	1	2	2	17	1	1	1	1	0	1	1	1	1	1
01-01-02-01-02-02-18.mp4	AV	Speech	Calm	Normal	Dogs	R2	A18	1	1	2	1	2	2	18	1	1	1	1	1	1	0	1	1	0
01-01-02-01-02-02-19.mp4	AV	Speech	Calm	Normal	Dogs	R2	A19	1	1	2	1	2	2	19	0	1	1	1	1	0	0	1	0	0
01-01-02-01-02-02-20.mp4	AV	Speech	Calm	Normal	Dogs	R2	A20	1	1	2	1	2	2	20	1	0	0	0	1	0	1	1	1	1
01-01-02-01-02-02-21.mp4	AV	Speech	Calm	Normal	Dogs	R2	A21	1	1	2	1	2	2	21	1	1	1	1	0	1	0	1	1	1
01-01-02-01-02-02-22.mp4	AV	Speech	Calm	Normal	Dogs	R2	A22	1	1	2	1	2	2	22	1	1	1	1	0	1	1	0	1	1
01-01-02-01-02-02-23.mp4	AV	Speech	Calm	Normal	Dogs	R2	A23	1	1	2	1	2	2	23	1	1	1	1	1	1	1	1	1	1
01-01-02-01-02-02-24.mp4	AV	Speech	Calm	Normal	Dogs	R2	A24	1	1	2	1	2	2	24	0	1	1	0	1	1	1	1	0	0
01-01-02-02-01-01-01.mp4	AV	Speech	Calm	Strong	Kids	R1	A1	1	1	2	2	1	1	1	1	1	1	1	1	0	0	0	1	1
01-01-02-02-01-01-02.mp4	AV	Speech	Calm	Strong	Kids	R1	A2	1	1	2	2	1	1	2	1	1	0	1	1	1	0	1	1	1
01-01-02-02-01-01-03.mp4	AV	Speech	Calm	Strong	Kids	R1	A3	1	1	2	2	1	1	3	0	0	0	0	1	0	0	0	0	0
01-01-02-02-01-01-04.mp4	AV	Speech	Calm	Strong	Kids	R1	A4	1	1	2	2	1	1	4	1	1	1	0	1	1	1	1	1	1
01-01-02-02-01-01-05.mp4	AV	Speech	Calm	Strong	Kids	R1	A5	1	1	2	2	1	1	5	0	1	0	0	0	0	0	1	1	1
01-01-02-02-01-01-06.mp4	AV	Speech	Calm	Strong	Kids	R1	A6	1	1	2	2	1	1	6	1	1	1	1	1	1	1	1	1	1
01-01-02-02-01-01-07.mp4	AV	Speech	Calm	Strong	Kids	R1	A7	1	1	2	2	1	1	7	0	1	1	1	0	1	1	1	1	1
01-01-02-02-01-01-08.mp4	AV	Speech	Calm	Strong	Kids	R1	A8	1	1	2	2	1	1	8	1	0	1	1	0	1	1	1	1	1
01-01-02-02-01-01-09.mp4	AV	Speech	Calm	Strong	Kids	R1	A9	1	1	2	2	1	1	9	1	1	0	1	1	1	0	1	0	1
01-01-02-02-01-01-10.mp4	AV	Speech	Calm	Strong	Kids	R1	A10	1	1	2	2	1	1	10	1	0	1	1	0	1	1	1	1	1
01-01-02-02-01-01-11.mp4	AV	Speech	Calm	Strong	Kids	R1	A11	1	1	2	2	1	1	11	1	1	1	0	1	0	1	1	1	1
01-01-02-02-01-01-12.mp4	AV	Speech	Calm	Strong	Kids	R1	A12	1	1	2	2	1	1	12	1	1	1	1	1	1	1	1	1	1
01-01-02-02-01-01-13.mp4	AV	Speech	Calm	Strong	Kids	R1	A13	1	1	2	2	1	1	13	1	1	1	0	0	1	1	1	1	1
01-01-02-02-01-01-14.mp4	AV	Speech	Calm	Strong	Kids	R1	A14	1	1	2	2	1	1	14	1	1	0	1	1	1	1	1	1	1
01-01-02-02-01-01-15.mp4	AV	Speech	Calm	Strong	Kids	R1	A15	1	1	2	2	1	1	15	1	1	1	1	1	1	1	1	1	1
01-01-02-02-01-01-16.mp4	AV	Speech	Calm	Strong	Kids	R1	A16	1	1	2	2	1	1	16	1	1	0	0	1	0	0	1	0	0
01-01-02-02-01-01-17.mp4	AV	Speech	Calm	Strong	Kids	R1	A17	1	1	2	2	1	1	17	1	1	1	1	1	1	1	0	1	1
01-01-02-02-01-01-18.mp4	AV	Speech	Calm	Strong	Kids	R1	A18	1	1	2	2	1	1	18	1	1	1	1	1	1	1	1	1	1
01-01-02-02-01-01-19.mp4	AV	Speech	Calm	Strong	Kids	R1	A19	1	1	2	2	1	1	19	1	0	0	0	1	0	0	0	0	0
01-01-02-02-01-01-20.mp4	AV	Speech	Calm	Strong	Kids	R1	A20	1	1	2	2	1	1	20	0	0	0	1	0	1	1	1	1	0
01-01-02-02-01-01-21.mp4	AV	Speech	Calm	Strong	Kids	R1	A21	1	1	2	2	1	1	21	1	1	1	1	1	1	0	1	1	1
01-01-02-02-01-01-22.mp4	AV	Speech	Calm	Strong	Kids	R1	A22	1	1	2	2	1	1	22	1	0	1	1	1	0	0	1	1	1
01-01-02-02-01-01-23.mp4	AV	Speech	Calm	Strong	Kids	R1	A23	1	1	2	2	1	1	23	1	1	1	1	1	1	1	1	1	1
01-01-02-02-01-01-24.mp4	AV	Speech	Calm	Strong	Kids	R1	A24	1	1	2	2	1	1	24	0	0	0	1	1	1	1	0	0	1
01-01-02-02-01-02-01.mp4	AV	Speech	Calm	Strong	Kids	R2	A1	1	1	2	2	1	2	1	1	1	0	1	1	1	1	1	1	1
01-01-02-02-01-02-02.mp4	AV	Speech	Calm	Strong	Kids	R2	A2	1	1	2	2	1	2	2	1	1	1	1	1	1	1	1	1	1
01-01-02-02-01-02-03.mp4	AV	Speech	Calm	Strong	Kids	R2	A3	1	1	2	2	1	2	3	0	1	0	0	0	0	1	0	0	0
01-01-02-02-01-02-04.mp4	AV	Speech	Calm	Strong	Kids	R2	A4	1	1	2	2	1	2	4	1	0	0	0	0	0	0	0	0	0
01-01-02-02-01-02-05.mp4	AV	Speech	Calm	Strong	Kids	R2	A5	1	1	2	2	1	2	5	0	0	1	1	1	0	1	1	1	1
01-01-02-02-01-02-06.mp4	AV	Speech	Calm	Strong	Kids	R2	A6	1	1	2	2	1	2	6	1	1	1	1	1	1	1	1	1	1
01-01-02-02-01-02-07.mp4	AV	Speech	Calm	Strong	Kids	R2	A7	1	1	2	2	1	2	7	1	0	0	1	1	1	1	1	1	1
01-01-02-02-01-02-08.mp4	AV	Speech	Calm	Strong	Kids	R2	A8	1	1	2	2	1	2	8	1	1	1	1	1	1	1	1	1	1
01-01-02-02-01-02-09.mp4	AV	Speech	Calm	Strong	Kids	R2	A9	1	1	2	2	1	2	9	0	1	1	1	1	1	1	0	0	1
01-01-02-02-01-02-10.mp4	AV	Speech	Calm	Strong	Kids	R2	A10	1	1	2	2	1	2	10	1	1	1	1	1	1	1	1	1	1
01-01-02-02-01-02-11.mp4	AV	Speech	Calm	Strong	Kids	R2	A11	1	1	2	2	1	2	11	1	0	1	1	1	0	0	0	1	1
01-01-02-02-01-02-12.mp4	AV	Speech	Calm	Strong	Kids	R2	A12	1	1	2	2	1	2	12	1	1	1	1	1	0	1	1	1	1
01-01-02-02-01-02-13.mp4	AV	Speech	Calm	Strong	Kids	R2	A13	1	1	2	2	1	2	13	1	1	0	1	0	1	1	1	1	0
01-01-02-02-01-02-14.mp4	AV	Speech	Calm	Strong	Kids	R2	A14	1	1	2	2	1	2	14	1	0	1	0	1	0	1	0	0	1
01-01-02-02-01-02-15.mp4	AV	Speech	Calm	Strong	Kids	R2	A15	1	1	2	2	1	2	15	1	1	1	1	1	1	1	1	1	1
01-01-02-02-01-02-16.mp4	AV	Speech	Calm	Strong	Kids	R2	A16	1	1	2	2	1	2	16	0	0	0	0	1	0	0	1	1	0
01-01-02-02-01-02-17.mp4	AV	Speech	Calm	Strong	Kids	R2	A17	1	1	2	2	1	2	17	1	1	1	1	1	1	1	1	1	1
01-01-02-02-01-02-18.mp4	AV	Speech	Calm	Strong	Kids	R2	A18	1	1	2	2	1	2	18	1	1	1	0	1	1	1	1	1	1
01-01-02-02-01-02-19.mp4	AV	Speech	Calm	Strong	Kids	R2	A19	1	1	2	2	1	2	19	1	0	0	1	0	0	1	1	1	0
01-01-02-02-01-02-20.mp4	AV	Speech	Calm	Strong	Kids	R2	A20	1	1	2	2	1	2	20	0	0	1	0	0	1	0	1	1	0
01-01-02-02-01-02-21.mp4	AV	Speech	Calm	Strong	Kids	R2	A21	1	1	2	2	1	2	21	0	0	0	1	1	1	1	0	0	0
01-01-02-02-01-02-22.mp4	AV	Speech	Calm	Strong	Kids	R2	A22	1	1	2	2	1	2	22	1	1	0	0	0	1	1	1	0	1
01-01-02-02-01-02-23.mp4	AV	Speech	Calm	Strong	Kids	R2	A23	1	1	2	2	1	2	23	1	0	1	1	1	1	1	1	1	1
01-01-02-02-01-02-24.mp4	AV	Speech	Calm	Strong	Kids	R2	A24	1	1	2	2	1	2	24	1	0	1	1	0	0	0	0	0	0
01-01-02-02-02-01-01.mp4	AV	Speech	Calm	Strong	Dogs	R1	A1	1	1	2	2	2	1	1	1	0	0	1	0	1	0	0	1	1
01-01-02-02-02-01-02.mp4	AV	Speech	Calm	Strong	Dogs	R1	A2	1	1	2	2	2	1	2	0	1	1	0	1	1	0	1	1	1
01-01-02-02-02-01-03.mp4	AV	Speech	Calm	Strong	Dogs	R1	A3	1	1	2	2	2	1	3	1	1	0	1	0	1	1	0	1	0
01-01-02-02-02-01-04.mp4	AV	Speech	Calm	Strong	Dogs	R1	A4	1	1	2	2	2	1	4	1	1	1	1	0	0	0	0	0	0
01-01-02-02-02-01-05.mp4	AV	Speech	Calm	Strong	Dogs	R1	A5	1	1	2	2	2	1	5	0	0	1	1	1	1	0	0	1	1
01-01-02-02-02-01-06.mp4	AV	Speech	Calm	Strong	Dogs	R1	A6	1	1	2	2	2	1	6	1	1	1	1	1	1	1	1	1	1
01-01-02-02-02-01-07.mp4	AV	Speech	Calm	Strong	Dogs	R1	A7	1	1	2	2	2	1	7	1	0	1	1	0	0	1	1	1	1
01-01-02-02-02-01-08.mp4	AV	Speech	Calm	Strong	Dogs	R1	A8	1	1	2	2	2	1	8	1	0	1	1	1	0	1	0	1	1
01-01-02-02-02-01-09.mp4	AV	Speech	Calm	Strong	Dogs	R1	A9	1	1	2	2	2	1	9	0	1	1	1	1	1	1	1	1	1
01-01-02-02-02-01-10.mp4	AV	Speech	Calm	Strong	Dogs	R1	A10	1	1	2	2	2	1	10	1	1	1	0	1	0	1	1	1	0
01-01-02-02-02-01-11.mp4	AV	Speech	Calm	Strong	Dogs	R1	A11	1	1	2	2	2	1	11	1	1	1	0	1	1	1	1	1	1
01-01-02-02-02-01-12.mp4	AV	Speech	Calm	Strong	Dogs	R1	A12	1	1	2	2	2	1	12	1	1	1	1	1	1	1	1	1	1
01-01-02-02-02-01-13.mp4	AV	Speech	Calm	Strong	Dogs	R1	A13	1	1	2	2	2	1	13	1	1	1	0	1	1	0	1	1	1
01-01-02-02-02-01-14.mp4	AV	Speech	Calm	Strong	Dogs	R1	A14	1	1	2	2	2	1	14	0	0	1	1	1	1	1	1	0	1
01-01-02-02-02-01-15.mp4	AV	Speech	Calm	Strong	Dogs	R1	A15	1	1	2	2	2	1	15	0	1	1	0	1	1	1	1	1	0
01-01-02-02-02-01-16.mp4	AV	Speech	Calm	Strong	Dogs	R1	A16	1	1	2	2	2	1	16	0	1	0	1	1	0	1	0	0	1
01-01-02-02-02-01-17.mp4	AV	Speech	Calm	Strong	Dogs	R1	A17	1	1	2	2	2	1	17	1	0	1	1	1	1	1	1	0	1
01-01-02-02-02-01-18.mp4	AV	Speech	Calm	Strong	Dogs	R1	A18	1	1	2	2	2	1	18	1	1	1	1	1	1	1	0	0	1
01-01-02-02-02-01-19.mp4	AV	Speech	Calm	Strong	Dogs	R1	A19	1	1	2	2	2	1	19	0	1	0	0	0	1	1	1	1	0
01-01-02-02-02-01-20.mp4	AV	Speech	Calm	Strong	Dogs	R1	A20	1	1	2	2	2	1	20	1	0	1	1	1	1	0	1	1	1
01-01-02-02-02-01-21.mp4	AV	Speech	Calm	Strong	Dogs	R1	A21	1	1	2	2	2	1	21	0	0	0	1	1	1	1	0	1	0
01-01-02-02-02-01-22.mp4	AV	Speech	Calm	Strong	Dogs	R1	A22	1	1	2	2	2	1	22	1	1	1	1	1	1	1	1	1	0
01-01-02-02-02-01-23.mp4	AV	Speech	Calm	Strong	Dogs	R1	A23	1	1	2	2	2	1	23	1	1	1	1	0	1	1	1	1	1
01-01-02-02-02-01-24.mp4	AV	Speech	Calm	Strong	Dogs	R1	A24	1	1	2	2	2	1	24	1	1	1	1	1	0	1	0	0	1
01-01-02-02-02-02-01.mp4	AV	Speech	Calm	Strong	Dogs	R2	A1	1	1	2	2	2	2	1	1	1	1	1	1	1	1	1	1	1
01-01-02-02-02-02-02.mp4	AV	Speech	Calm	Strong	Dogs	R2	A2	1	1	2	2	2	2	2	0	1	1	1	1	0	1	0	1	0
01-01-02-02-02-02-03.mp4	AV	Speech	Calm	Strong	Dogs	R2	A3	1	1	2	2	2	2	3	0	0	1	0	0	0	1	1	0	0
01-01-02-02-02-02-04.mp4	AV	Speech	Calm	Strong	Dogs	R2	A4	1	1	2	2	2	2	4	0	0	0	1	1	0	0	1	1	0
01-01-02-02-02-02-05.mp4	AV	Speech	Calm	Strong	Dogs	R2	A5	1	1	2	2	2	2	5	1	1	1	1	1	1	0	1	1	0
01-01-02-02-02-02-06.mp4	AV	Speech	Calm	Strong	Dogs	R2	A6	1	1	2	2	2	2	6	1	1	1	1	1	1	1	1	1	1
01-01-02-02-02-02-07.mp4	AV	Speech	Calm	Strong	Dogs	R2	A7	1	1	2	2	2	2	7	1	1	1	1	1	1	1	0	1	1
01-01-02-02-02-02-08.mp4	AV	Speech	Calm	Strong	Dogs	R2	A8	1	1	2	2	2	2	8	1	1	1	0	1	1	1	0	1	1
01-01-02-02-02-02-09.mp4	AV	Speech	Calm	Strong	Dogs	R2	A9	1	1	2	2	2	2	9	0	1	1	1	1	1	1	1	0	0
01-01-02-02-02-02-10.mp4	AV	Speech	Calm	Strong	Dogs	R2	A10	1	1	2	2	2	2	10	1	1	1	1	1	0	1	1	0	1
01-01-02-02-02-02-11.mp4	AV	Speech	Calm	Strong	Dogs	R2	A11	1	1	2	2	2	2	11	1	1	1	1	1	1	1	1	1	1
01-01-02-02-02-02-12.mp4	AV	Speech	Calm	Strong	Dogs	R2	A12	1	1	2	2	2	2	12	1	1	1	1	1	1	1	1	1	1
01-01-02-02-02-02-13.mp4	AV	Speech	Calm	Strong	Dogs	R2	A13	1	1	2	2	2	2	13	1	1	1	1	1	1	1	1	1	0
01-01-02-02-02-02-14.mp4	AV	Speech	Calm	Strong	Dogs	R2	A14	1	1	2	2	2	2	14	1	0	1	1	1	1	0	1	1	1
01-01-02-02-02-02-15.mp4	AV	Speech	Calm	Strong	Dogs	R2	A15	1	1	2	2	2	2	15	1	1	1	0	1	1	1	1	1	1
01-01-02-02-02-02-16.mp4	AV	Speech	Calm	Strong	Dogs	R2	A16	1	1	2	2	2	2	16	1	1	0	1	0	0	0	1	0	0
01-01-02-02-02-02-17.mp4	AV	Speech	Calm	Strong	Dogs	R2	A17	1	1	2	2	2	2	17	1	0	1	1	1	1	1	1	1	1
01-01-02-02-02-02-18.mp4	AV	Speech	Calm	Strong	Dogs	R2	A18	1	1	2	2	2	2	18	1	0	0	0	1	1	1	1	1	1
01-01-02-02-02-02-19.mp4	AV	Speech	Calm	Strong	Dogs	R2	A19	1	1	2	2	2	2	19	0	0	0	1	1	1	1	1	0	0
01-01-02-02-02-02-20.mp4	AV	Speech	Calm	Strong	Dogs	R2	A20	1	1	2	2	2	2	20	0	1	1	1	1	1	1	1	1	1
01-01-02-02-02-02-21.mp4	AV	Speech	Calm	Strong	Dogs	R2	A21	1	1	2	2	2	2	21	0	1	1	0	1	0	0	0	0	0
01-01-02-02-02-02-22.mp4	AV	Speech	Calm	Strong	Dogs	R2	A22	1	1	2	2	2	2	22	0	1	0	1	1	1	1	1	1	1
01-01-02-02-02-02-23.mp4	AV	Speech	Calm	Strong	Dogs	R2	A23	1	1	2	2	2	2	23	1	1	1	1	0	1	1	1	1	1
01-01-02-02-02-02-24.mp4	AV	Speech	Calm	Strong	Dogs	R2	A24	1	1	2	2	2	2	24	0	1	1	1	1	1	0	1	1	1
01-01-03-01-01-01-01.mp4	AV	Speech	Happy	Normal	Kids	R1	A1	1	1	3	1	1	1	1	0	1	0	1	1	1	1	1	1	1
01-01-03-01-01-01-02.mp4	AV	Speech	Happy	Normal	Kids	R1	A2	1	1	3	1	1	1	2	1	1	1	1	1	1	1	1	1	1
01-01-03-01-01-01-03.mp4	AV	Speech	Happy	Normal	Kids	R1	A3	1	1	3	1	1	1	3	0	0	0	0	1	0	1	1	1	0
01-01-03-01-01-01-04.mp4	AV	Speech	Happy	Normal	Kids	R1	A4	1	1	3	1	1	1	4	1	0	1	1	0	1	1	1	0	1
01-01-03-01-01-01-05.mp4	AV	Speech	Happy	Normal	Kids	R1	A5	1	1	3	1	1	1	5	1	1	0	1	1	1	1	0	1	1
01-01-03-01-01-01-06.mp4	AV	Speech	Happy	Normal	Kids	R1	A6	1	1	3	1	1	1	6	1	1	0	1	1	1	1	1	1	1
01-01-03-01-01-01-07.mp4	AV	Speech	Happy	Normal	Kids	R1	A7	1	1	3	1	1	1	7	1	1	1	0	1	1	0	1	1	1
01-01-03-01-01-01-08.mp4	AV	Speech	Happy	Normal	Kids	R1	A8	1	1	3	1	1	1	8	1	1	1	1	1	1	1	1	1	1
01-01-03-01-01-01-09.mp4	AV	Speech	Happy	Normal	Kids	R1	A9	1	1	3	1	1	1	9	0	1	1	1	1	0	1	1	1	1
01-01-03-01-01-01-10.mp4	AV	Speech	Happy	Normal	Kids	R1	A10	1	1	3	1	1	1	10	1	1	1	1	0	1	1	1	1	1
01-01-03-01-01-01-11.mp4	AV	Speech	Happy	Normal	Kids	R1	A11	1	1	3	1	1	1	11	0	1	0	0	1	1	0	0	0	1
01-01-03-01-01-01-12.mp4	AV	Speech	Happy	Normal	Kids	R1	A12	1	1	3	1	1	1	12	1	1	1	1	1	1	1	1	1	1
01-01-03-01-01-01-13.mp4	AV	Speech	Happy	Normal	Kids	R1	A13	1	1	3	1	1	1	13	1	1	1	0	1	1	1	1	1	1
01-01-03-01-01-01-14.mp4	AV	Speech	Happy	Normal	Kids	R1	A14	1	1	3	1	1	1	14	1	1	1	1	0	1	1	1	1	0
01-01-03-01-01-01-15.mp4	AV	Speech	Happy	Normal	Kids	R1	A15	1	1	3	1	1	1	15	1	1	1	1	1	1	1	1	0	1
01-01-03-01-01-01-16.mp4	AV	Speech	Happy	Normal	Kids	R1	A16	1	1	3	1	1	1	16	1	0	1	1	1	1	1	1	1	1
01-01-03-01-01-01-17.mp4	AV	Speech	Happy	Normal	Kids	R1	A17	1	1	3	1	1	1	17	1	0	1	1	1	0	0	1	0	0
01-01-03-01-01-01-18.mp4	AV	Speech	Happy	Normal	Kids	R1	A18	1	1	3	1	1	1	18	1	1	1	1	1	0	1	1	1	1
01-01-03-01-01-01-19.mp4	AV	Speech	Happy	Normal	Kids	R1	A19	1	1	3	1	1	1	19	0	1	0	0	0	1	0	1	0	0
01-01-03-01-01-01-20.mp4	AV	Speech	Happy	Normal	Kids	R1	A20	1	1	3	1	1	1	20	1	1	0	0	1	1	1	0	1	1
01-01-03-01-01-01-21.mp4	AV	Speech	Happy	Normal	Kids	R1	A21	1	1	3	1	1	1	21	0	1	1	0	0	1	1	1	1	1
01-01-03-01-01-01-22.mp4	AV	Speech	Happy	Normal	Kids	R1	A22	1	1	3	1	1	1	22	1	0	1	0	1	1	1	1	1	1
01-01-03-01-01-01-23.mp4	AV	Speech	Happy	Normal	Kids	R1	A23	1	1	3	1	1	1	23	0	0	0	0	1	0	0	0	0	1
01-01-03-01-01-01-24.mp4	AV	Speech	Happy	Normal	Kids	R1	A24	1	1	3	1	1	1	24	0	1	1	1	1	1	1	1	1	1
01-01-03-01-01-02-01.mp4	AV	Speech	Happy	Normal	Kids	R2	A1	1	1	3	1	1	2	1	1	1	1	1	1	1	0	1	1	1
01-01-03-01-01-02-02.mp4	AV	Speech	Happy	Normal	Kids	R2	A2	1	1	3	1	1	2	2	1	1	1	1	1	0	1	1	1	1
01-01-03-01-01-02-03.mp4	AV	Speech	Happy	Normal	Kids	R2	A3	1	1	3	1	1	2	3	1	1	1	1	0	0	1	0	1	1
01-01-03-01-01-02-04.mp4	AV	Speech	Happy	Normal	Kids	R2	A4	1	1	3	1	1	2	4	1	1	1	1	1	1	1	1	1	1
01-01-03-01-01-02-05.mp4	AV	Speech	Happy	Normal	Kids	R2	A5	1	1	3	1	1	2	5	1	1	1	1	1	1	1	0	1	1
01-01-03-01-01-02-06.mp4	AV	Speech	Happy	Normal	Kids	R2	A6	1	1	3	1	1	2	6	1	1	1	1	1	1	1	1	1	1
01-01-03-01-01-02-07.mp4	AV	Speech	Happy	Normal	Kids	R2	A7	1	1	3	1	1	2	7	1	1	1	1	0	1	0	0	1	1
01-01-03-01-01-02-08.mp4	AV	Speech	Happy	Normal	Kids	R2	A8	1	1	3	1	1	2	8	1	1	1	1	1	1	1	1	0	1
01-01-03-01-01-02-09.mp4	AV	Speech	Happy	Normal	Kids	R2	A9	1	1	3	1	1	2	9	1	1	1	1	1	1	0	1	1	1
01-01-03-01-01-02-10.mp4	AV	Speech	Happy	Normal	Kids	R2	A10	1	1	3	1	1	2	10	1	1	1	1	1	0	1	1	1	1
01-01-03-01-01-02-11.mp4	AV	Speech	Happy	Normal	Kids	R2	A11	1	1	3	1	1	2	11	1	0	1	0	1	1	1	0	1	1
01-01-03-01-01-02-12.mp4	AV	Speech	Happy	Normal	Kids	R2	A12	1	1	3	1	1	2	12	1	1	1	1	1	0	0	1	1	1
01-01-03-01-01-02-13.mp4	AV	Speech	Happy	Normal	Kids	R2	A13	1	1	3	1	1	2	13	1	1	1	1	1	1	0	0	0	1
01-01-03-01-01-02-14.mp4	AV	Speech	Happy	Normal	Kids	R2	A14	1	1	3	1	1	2	14	1	1	1	0	0	1	1	1	1	1
01-01-03-01-01-02-15.mp4	AV	Speech	Happy	Normal	Kids	R2	A15	1	1	3	1	1	2	15	0	1	1	1	1	0	0	0	0	1
01-01-03-01-01-02-16.mp4	AV	Speech	Happy	Normal	Kids	R2	A16	1	1	3	1	1	2	16	1	1	1	1	1	1	1	1	1	0
01-01-03-01-01-02-17.mp4	AV	Speech	Happy	Normal	Kids	R2	A17	1	1	3	1	1	2	17	1	0	0	0	0	1	0	0	0	1
01-01-03-01-01-02-18.mp4	AV	Speech	Happy	Normal	Kids	R2	A18	1	1	3	1	1	2	18	1	1	1	1	1	1	1	1	1	1
01-01-03-01-01-02-19.mp4	AV	Speech	Happy	Normal	Kids	R2	A19	1	1	3	1	1	2	19	0	0	1	0	1	0	1	1	1	1
01-01-03-01-01-02-20.mp4	AV	Speech	Happy	Normal	Kids	R2	A20	1	1	3	1	1	2	20	1	0	1	1	1	1	0	1	1	1
01-01-03-01-01-02-21.mp4	AV	Speech	Happy	Normal	Kids	R2	A21	1	1	3	1	1	2	21	1	1	1	1	0	0	1	0	1	0
01-01-03-01-01-02-22.mp4	AV	Speech	Happy	Normal	Kids	R2	A22	1	1	3	1	1	2	22	1	1	1	1	1	0	1	1	1	1
01-01-03-01-01-02-23.mp4	AV	Speech	Happy	Normal	Kids	R2	A23	1	1	3	1	1	2	23	1	1	0	1	0	1	1	1	1	0
01-01-03-01-01-02-24.mp4	AV	Speech	Happy	Normal	Kids	R2	A24	1	1	3	1	1	2	24	1	1	1	1	1	1	0	0	1	1
01-01-03-01-02-01-01.mp4	AV	Speech	Happy	Normal	Dogs	R1	A1	1	1	3	1	2	1	1	1	1	1	1	1	1	1	1	1	1
01-01-03-01-02-01-02.mp4	AV	Speech	Happy	Normal	Dogs	R1	A2	1	1	3	1	2	1	2	1	0	1	1	1	1	0	1	1	0
01-01-03-01-02-01-03.mp4	AV	Speech	Happy	Normal	Dogs	R1	A3	1	1	3	1	2	1	3	1	1	1	1	0	1	1	0	1	0
01-01-03-01-02-01-04.mp4	AV	Speech	Happy	Normal	Dogs	R1	A4	1	1	3	1	2	1	4	1	1	1	1	1	1	1	1	1	1
01-01-03-01-02-01-05.mp4	AV	Speech	Happy	Normal	Dogs	R1	A5	1	1	3	1	2	1	5	1	1	1	1	1	1	1	1	1	1
01-01-03-01-02-01-06.mp4	AV	Speech	Happy	Normal	Dogs	R1	A6	1	1	3	1	2	1	6	1	1	0	1	1	1	1	1	1	1
01-01-03-01-02-01-07.mp4	AV	Speech	Happy	Normal	Dogs	R1	A7	1	1	3	1	2	1	7	1	1	1	1	1	1	1	1	1	1
01-01-03-01-02-01-08.mp4	AV	Speech	Happy	Normal	Dogs	R1	A8	1	1	3	1	2	1	8	1	1	1	0	1	1	1	1	1	1
01-01-03-01-02-01-09.mp4	AV	Speech	Happy	Normal	Dogs	R1	A9	1	1	3	1	2	1	9	1	1	1	0	0	1	1	1	1	1
01-01-03-01-02-01-10.mp4	AV	Speech	Happy	Normal	Dogs	R1	A10	1	1	3	1	2	1	10	1	1	1	1	0	1	1	1	1	1
01-01-03-01-02-01-11.mp4	AV	Speech	Happy	Normal	Dogs	R1	A11	1	1	3	1	2	1	11	0	1	1	1	0	1	1	1	1	1
01-01-03-01-02-01-12.mp4	AV	Speech	Happy	Normal	Dogs	R1	A12	1	1	3	1	2	1	12	1	1	0	1	1	1	1	1	0	1
01-01-03-01-02-01-13.mp4	AV	Speech	Happy	Normal	Dogs	R1	A13	1	1	3	1	2	1	13	1	1	1	1	1	1	0	1	1	1
01-01-03-01-02-01-14.mp4	AV	Speech	Happy	Normal	Dogs	R1	A14	1	1	3	1	2	1	14	0	1	0	1	1	0	1	0	1	1
01-01-03-01-02-01-15.mp4	AV	Speech	Happy	Normal	Dogs	R1	A15	1	1	3	1	2	1	15	1	0	1	0	0	1	1	1	0	1
01-01-03-01-02-01-16.mp4	AV	Speech	Happy	Normal	Dogs	R1	A16	1	1	3	1	2	1	16	1	1	1	1	1	1	1	1	1	1
01-01-03-01-02-01-17.mp4	AV	Speech	Happy	Normal	Dogs	R1	A17	1	1	3	1	2	1	17	1	1	0	0	1	0	1	1	1	0
01-01-03-01-02-01-18.mp4	AV	Speech	Happy	Normal	Dogs	R1	A18	1	1	3	1	2	1	18	0	1	1	0	1	1	1	1	1	1
01-01-03-01-02-01-19.mp4	AV	Speech	Happy	Normal	Dogs	R1	A19	1	1	3	1	2	1	19	0	1	0	1	1	1	1	1	1	0
01-01-03-01-02-01-20.mp4	AV	Speech	Happy	Normal	Dogs	R1	A20	1	1	3	1	2	1	20	0	1	1	1	0	1	0	1	1	0
01-01-03-01-02-01-21.mp4	AV	Speech	Happy	Normal	Dogs	R1	A21	1	1	3	1	2	1	21	1	1	0	0	1	1	0	1	0	0
01-01-03-01-02-01-22.mp4	AV	Speech	Happy	Normal	Dogs	R1	A22	1	1	3	1	2	1	22	1	1	1	1	1	1	1	1	1	1
01-01-03-01-02-01-23.mp4	AV	Speech	Happy	Normal	Dogs	R1	A23	1	1	3	1	2	1	23	1	1	1	1	0	1	1	1	1	0
01-01-03-01-02-01-24.mp4	AV	Speech	Happy	Normal	Dogs	R1	A24	1	1	3	1	2	1	24	1	1	1	0	1	1	1	0	1	0
01-01-03-01-02-02-01.mp4	AV	Speech	Happy	Normal	Dogs	R2	A1	1	1	3	1	2	2	1	1	1	1	1	1	1	1	1	1	1
01-01-03-01-02-02-02.mp4	AV	Speech	Happy	Normal	Dogs	R2	A2	1	1	3	1	2	2	2	0	1	1	1	1	0	0	1	1	1
01-01-03-01-02-02-03.mp4	AV	Speech	Happy	Normal	Dogs	R2	A3	1	1	3	1	2	2	3	1	1	0	1	1	1	1	1	0	0
01-01-03-01-02-02-04.mp4	AV	Speech	Happy	Normal	Dogs	R2	A4	1	1	3	1	2	2	4	1	1	1	1	1	1	1	1	1	1
01-01-03-01-02-02-05.mp4	AV	Speech	Happy	Normal	Dogs	R2	A5	1	1	3	1	2	2	5	0	0	1	1	1	1	1	1	1	1
01-01-03-01-02-02-06.mp4	AV	Speech	Happy	Normal	Dogs	R2	A6	1	1	3	1	2	2	6	1	1	1	1	1	1	1	1	1	1
01-01-03-01-02-02-07.mp4	AV	Speech	Happy	Normal	Dogs	R2	A7	1	1	3	1	2	2	7	1	1	1	1	1	1	1	1	1	1
01-01-03-01-02-02-08.mp4	AV	Speech	Happy	Normal	Dogs	R2	A8	1	1	3	1	2	2	8	1	1	1	1	1	1	1	1	1	0
01-01-03-01-02-02-09.mp4	AV	Speech	Happy	Normal	Dogs	R2	A9	1	1	3	1	2	2	9	1	1	1	1	1	1	1	1	1	1
01-01-03-01-02-02-10.mp4	AV	Speech	Happy	Normal	Dogs	R2	A10	1	1	3	1	2	2	10	1	1	0	1	1	1	0	1	0	1
01-01-03-01-02-02-11.mp4	AV	Speech	Happy	Normal	Dogs	R2	A11	1	1	3	1	2	2	11	1	1	1	0	1	0	0	1	0	1
01-01-03-01-02-02-12.mp4	AV	Speech	Happy	Normal	Dogs	R2	A12	1	1	3	1	2	2	12	1	1	1	1	0	1	1	1	1	1
01-01-03-01-02-02-13.mp4	AV	Speech	Happy	Normal	Dogs	R2	A13	1	1	3	1	2	2	13	1	1	1	1	1	1	1	1	1	1
01-01-03-01-02-02-14.mp4	AV	Speech	Happy	Normal	Dogs	R2	A14	1	1	3	1	2	2	14	1	1	1	1	1	1	1	1	1	1
01-01-03-01-02-02-15.mp4	AV	Speech	Happy	Normal	Dogs	R2	A15	1	1	3	1	2	2	15	1	1	1	0	1	1	1	0	1	1
01-01-03-01-02-02-16.mp4	AV	Speech	Happy	Normal	Dogs	R2	A16	1	1	3	1	2	2	16	1	1	1	1	1	1	1	1	1	1
01-01-03-01-02-02-17.mp4	AV	Speech	Happy	Normal	Dogs	R2	A17	1	1	3	1	2	2	17	0	1	1	1	0	1	0	1	0	0
01-01-03-01-02-02-18.mp4	AV	Speech	Happy	Normal	Dogs	R2	A18	1	1	3	1	2	2	18	1	1	1	1	1	1	1	1	1	1
01-01-03-01-02-02-19.mp4	AV	Speech	Happy	Normal	Dogs	R2	A19	1	1	3	1	2	2	19	1	1	1	1	1	1	0	1	1	1
01-01-03-01-02-02-20.mp4	AV	Speech	Happy	Normal	Dogs	R2	A20	1	1	3	1	2	2	20	1	1	1	1	1	0	0	1	0	1
01-01-03-01-02-02-21.mp4	AV	Speech	Happy	Normal	Dogs	R2	A21	1	1	3	1	2	2	21	1	0	1	0	1	0	1	1	0	1
01-01-03-01-02-02-22.mp4	AV	Speech	Happy	Normal	Dogs	R2	A22	1	1	3	1	2	2	22	1	1	0	1	1	1	1	1	0	1
01-01-03-01-02-02-23.mp4	AV	Speech	Happy	Normal	Dogs	R2	A23	1	1	3	1	2	2	23	1	0	1	1	1	1	0	1	1	1
01-01-03-01-02-02-24.mp4	AV	Speech	Happy	Normal	Dogs	R2	A24	1	1	3	1	2	2	24	1	1	1	1	1	1	1	1	0	1
01-01-03-02-01-01-01.mp4	AV	Speech	Happy	Strong	Kids	R1	A1	1	1	3	2	1	1	1	1	1	1	1	1	0	0	0	1	1
01-01-03-02-01-01-02.mp4	AV	Speech	Happy	Strong	Kids	R1	A2	1	1	3	2	1	1	2	1	1	1	1	1	1	1	1	1	1
01-01-03-02-01-01-03.mp4	AV	Speech	Happy	Strong	Kids	R1	A3	1	1	3	2	1	1	3	1	1	1	1	0	0	0	1	1	1
01-01-03-02-01-01-04.mp4	AV	Speech	Happy	Strong	Kids	R1	A4	1	1	3	2	1	1	4	1	1	1	1	1	0	1	1	1	1
01-01-03-02-01-01-05.mp4	AV	Speech	Happy	Strong	Kids	R1	A5	1	1	3	2	1	1	5	1	1	1	1	1	1	1	1	1	0
01-01-03-02-01-01-06.mp4	AV	Speech	Happy	Strong	Kids	R1	A6	1	1	3	2	1	1	6	1	1	1	1	1	1	1	1	1	1
01-01-03-02-01-01-07.mp4	AV	Speech	Happy	Strong	Kids	R1	A7	1	1	3	2	1	1	7	1	1	1	1	0	1	1	1	0	0
01-01-03-02-01-01-08.mp4	AV	Speech	Happy	Strong	Kids	R1	A8	1	1	3	2	1	1	8	1	1	0	1	1	1	1	1	1	1
01-01-03-02-01-01-09.mp4	AV	Speech	Happy	Strong	Kids	R1	A9	1	1	3	2	1	1	9	0	1	1	1	1	1	1	0	1	1
01-01-03-02-01-01-10.mp4	AV	Speech	Happy	Strong	Kids	R1	A10	1	1	3	2	1	1	10	1	1	1	1	1	0	0	1	1	1
01-01-03-02-01-01-11.mp4	AV	Speech	Happy	Strong	Kids	R1	A11	1	1	3	2	1	1	11	1	1	1	1	1	1	1	1	1	1
01-01-03-02-01-01-12.mp4	AV	Speech	Happy	Strong	Kids	R1	A12	1	1	3	2	1	1	12	1	1	1	1	1	1	1	1	1	0
01-01-03-02-01-01-13.mp4	AV	Speech	Happy	Strong	Kids	R1	A13	1	1	3	2	1	1	13	1	1	0	1	0	0	1	1	1	1
01-01-03-02-01-01-14.mp4	AV	Speech	Happy	Strong	Kids	R1	A14	1	1	3	2	1	1	14	1	1	1	1	1	1	0	1	1	1
01-01-03-02-01-01-15.mp4	AV	Speech	Happy	Strong	Kids	R1	A15	1	1	3	2	1	1	15	1	1	1	1	0	1	1	1	1	1
01-01-03-02-01-01-16.mp4	AV	Speech	Happy	Strong	Kids	R1	A16	1	1	3	2	1	1	16	1	1	1	1	1	0	1	1	1	1
01-01-03-02-01-01-17.mp4	AV	Speech	Happy	Strong	Kids	R1	A17	1	1	3	2	1	1	17	1	1	0	1	0	0	0	0	0	1
01-01-03-02-01-01-18.mp4	AV	Speech	Happy	Strong	Kids	R1	A18	1	1	3	2	1	1	18	1	1	1	1	1	1	1	1	1	0
01-01-03-02-01-01-19.mp4	AV	Speech	Happy	Strong	Kids	R1	A19	1	1	3	2	1	1	19	1	1	1	0	1	1	1	0	1	0
01-01-03-02-01-01-20.mp4	AV	Speech	Happy	Strong	Kids	R1	A20	1	1	3	2	1	1	20	1	1	1	1	1	1	1	1	1	1
01-01-03-02-01-01-21.mp4	AV	Speech	Happy	Strong	Kids	R1	A21	1	1	3	2	1	1	21	1	1	1	1	1	1	1	1	1	1
01-01-03-02-01-01-22.mp4	AV	Speech	Happy	Strong	Kids	R1	A22	1	1	3	2	1	1	22	1	1	1	1	1	1	1	1	1	0
01-01-03-02-01-01-23.mp4	AV	Speech	Happy	Strong	Kids	R1	A23	1	1	3	2	1	1	23	1	0	0	1	0	1	0	0	1	1
01-01-03-02-01-01-24.mp4	AV	Speech	Happy	Strong	Kids	R1	A24	1	1	3	2	1	1	24	1	1	1	1	1	1	1	1	1	0
01-01-03-02-01-02-01.mp4	AV	Speech	Happy	Strong	Kids	R2	A1	1	1	3	2	1	2	1	1	1	1	1	1	1	1	1	1	1
01-01-03-02-01-02-02.mp4	AV	Speech	Happy	Strong	Kids	R2	A2	1	1	3	2	1	2	2	1	1	1	1	1	1	1	1	1	1
01-01-03-02-01-02-03.mp4	AV	Speech	Happy	Strong	Kids	R2	A3	1	1	3	2	1	2	3	1	0	1	0	0	0	0	1	1	1
01-01-03-02-01-02-04.mp4	AV	Speech	Happy	Strong	Kids	R2	A4	1	1	3	2	1	2	4	1	1	0	1	1	1	1	1	1	1
01-01-03-02-01-02-05.mp4	AV	Speech	Happy	Strong	Kids	R2	A5	1	1	3	2	1	2	5	1	1	1	1	1	1	1	1	1	1
01-01-03-02-01-02-06.mp4	AV	Speech	Happy	Strong	Kids	R2	A6	1	1	3	2	1	2	6	1	1	1	1	0	1	1	1	1	1
01-01-03-02-01-02-07.mp4	AV	Speech	Happy	Strong	Kids	R2	A7	1	1	3	2	1	2	7	0	0	1	1	1	1	0	1	1	1
01-01-03-02-01-02-08.mp4	AV	Speech	Happy	Strong	Kids	R2	A8	1	1	3	2	1	2	8	1	1	1	1	1	1	1	0	1	1
01-01-03-02-01-02-09.mp4	AV	Speech	Happy	Strong	Kids	R2	A9	1	1	3	2	1	2	9	1	1	1	1	1	1	0	1	0	1
01-01-03-02-01-02-10.mp4	AV	Speech	Happy	Strong	Kids	R2	A10	1	1	3	2	1	2	10	1	1	1	1	1	1	1	0	1	1
01-01-03-02-01-02-11.mp4	AV	Speech	Happy	Strong	Kids	R2	A11	1	1	3	2	1	2	11	1	1	1	1	1	1	1	1	1	1
01-01-03-02-01-02-12.mp4	AV	Speech	Happy	Strong	Kids	R2	A12	1	1	3	2	1	2	12	1	1	1	1	1	1	1	1	1	1
01-01-03-02-01-02-13.mp4	AV	Speech	Happy	Strong	Kids	R2	A13	1	1	3	2	1	2	13	1	1	1	1	1	1	1	1	1	1
01-01-03-02-01-02-14.mp4	AV	Speech	Happy	Strong	Kids	R2	A14	1	1	3	2	1	2	14	1	1	1	1	1	1	1	1	1	1
01-01-03-02-01-02-15.mp4	AV	Speech	Happy	Strong	Kids	R2	A15	1	1	3	2	1	2	15	1	1	1	1	1	1	1	1	0	1
01-01-03-02-01-02-16.mp4	AV	Speech	Happy	Strong	Kids	R2	A16	1	1	3	2	1	2	16	1	1	1	1	1	0	1	1	1	1
01-01-03-02-01-02-17.mp4	AV	Speech	Happy	Strong	Kids	R2	A17	1	1	3	2	1	2	17	0	1	1	0	0	0	1	1	0	1
01-01-03-02-01-02-18.mp4	AV	Speech	Happy	Strong	Kids	R2	A18	1	1	3	2	1	2	18	1	1	0	1	1	1	1	1	0	1
01-01-03-02-01-02-19.mp4	AV	Speech	Happy	Strong	Kids	R2	A19	1	1	3	2	1	2	19	1	1	0	1	1	1	0	0	1	1
01-01-03-02-01-02-20.mp4	AV	Speech	Happy	Strong	Kids	R2	A20	1	1	3	2	1	2	20	1	1	1	1	0	1	1	1	1	1
01-01-03-02-01-02-21.mp4	AV	Speech	Happy	Strong	Kids	R2	A21	1	1	3	2	1	2	21	1	1	1	1	0	1	0	1	1	1
01-01-03-02-01-02-22.mp4	AV	Speech	Happy	Strong	Kids	R2	A22	1	1	3	2	1	2	22	0	0	1	0	1	1	1	1	1	1
01-01-03-02-01-02-23.mp4	AV	Speech	Happy	Strong	Kids	R2	A23	1	1	3	2	1	2	23	0	0	0	1	0	0	0	1	1	1
01-01-03-02-01-02-24.mp4	AV	Speech	Happy	Strong	Kids	R2	A24	1	1	3	2	1	2	24	1	1	1	1	1	1	1	1	1	1
01-01-03-02-02-01-01.mp4	AV	Speech	Happy	Strong	Dogs	R1	A1	1	1	3	2	2	1	1	1	1	1	1	1	1	1	1	1	1
01-01-03-02-02-01-02.mp4	AV	Speech	Happy	Strong	Dogs	R1	A2	1	1	3	2	2	1	2	1	1	1	1	1	1	1	1	1	1
01-01-03-02-02-01-03.mp4	AV	Speech	Happy	Strong	Dogs	R1	A3	1	1	3	2	2	1	3	1	1	0	1	1	0	1	1	1	1
01-01-03-02-02-01-04.mp4	AV	Speech	Happy	Strong	Dogs	R1	A4	1	1	3	2	2	1	4	1	0	1	1	0	1	1	1	1	1
01-01-03-02-02-01-05.mp4	AV	Speech	Happy	Strong	Dogs	R1	A5	1	1	3	2	2	1	5	1	1	1	1	1	1	1	1	1	1
01-01-03-02-02-01-06.mp4	AV	Speech	Happy	Strong	Dogs	R1	A6	1	1	3	2	2	1	6	1	1	1	1	1	1	1	0	0	1
01-01-03-02-02-01-07.mp4	AV	Speech	Happy	Strong	Dogs	R1	A7	1	1	3	2	2	1	7	1	1	1	1	1	1	1	1	1	1
01-01-03-02-02-01-08.mp4	AV	Speech	Happy	Strong	Dogs	R1	A8	1	1	3	2	2	1	8	1	1	1	1	1	1	1	1	0	1
01-01-03-02-02-01-09.mp4	AV	Speech	Happy	Strong	Dogs	R1	A9	1	1	3	2	2	1	9	1	1	0	0	1	0	1	0	1	1
01-01-03-02-02-01-10.mp4	AV	Speech	Happy	Strong	Dogs	R1	A10	1	1	3	2	2	1	10	1	1	0	1	1	1	0	1	1	1
01-01-03-02-02-01-11.mp4	AV	Speech	Happy	Strong	Dogs	R1	A11	1	1	3	2	2	1	11	1	1	0	1	1	1	1	1	0	1
01-01-03-02-02-01-12.mp4	AV	Speech	Happy	Strong	Dogs	R1	A12	1	1	3	2	2	1	12	1	1	1	1	1	1	1	1	1	1
01-01-03-02-02-01-13.mp4	AV	Speech	Happy	Strong	Dogs	R1	A13	1	1	3	2	2	1	13	0	1	0	0	0	0	1	0	1	1
01-01-03-02-02-01-14.mp4	AV	Speech	Happy	Strong	Dogs	R1	A14	1	1	3	2	2	1	14	1	1	0	1	1	0	1	1	1	0
01-01-03-02-02-01-15.mp4	AV	Speech	Happy	Strong	Dogs	R1	A15	1	1	3	2	2	1	15	1	1	1	1	0	1	1	1	1	1
01-01-03-02-02-01-16.mp4	AV	Speech	Happy	Strong	Dogs	R1	A16	1	1	3	2	2	1	16	1	1	1	1	1	1	1	1	1	1
01-01-03-02-02-01-17.mp4	AV	Speech	Happy	Strong	Dogs	R1	A17	1	1	3	2	2	1	17	1	1	1	1	1	1	0	1	0	1
01-01-03-02-02-01-18.mp4	AV	Speech	Happy	Strong	Dogs	R1	A18	1	1	3	2	2	1	18	1	1	1	1	1	1	1	0	1	1
01-01-03-02-02-01-19.mp4	AV	Speech	Happy	Strong	Dogs	R1	A19	1	1	3	2	2	1	19	1	1	1	1	1	1	1	0	1	1
01-01-03-02-02-01-20.mp4	AV	Speech	Happy	Strong	Dogs	R1	A20	1	1	3	2	2	1	20	1	1	0	1	1	1	1	0	1	1
01-01-03-02-02-01-21.mp4	AV	Speech	Happy	Strong	Dogs	R1	A21	1	1	3	2	2	1	21	1	1	1	1	1	1	0	1	1	1
01-01-03-02-02-01-22.mp4	AV	Speech	Happy	Strong	Dogs	R1	A22	1	1	3	2	2	1	22	1	1	1	1	0	0	1	1	1	1
01-01-03-02-02-01-23.mp4	AV	Speech	Happy	Strong	Dogs	R1	A23	1	1	3	2	2	1	23	0	1	1	1	0	0	0	0	0	0
01-01-03-02-02-01-24.mp4	AV	Speech	Happy	Strong	Dogs	R1	A24	1	1	3	2	2	1	24	1	1	1	1	1	1	1	1	0	1
01-01-03-02-02-02-01.mp4	AV	Speech	Happy	Strong	Dogs	R2	A1	1	1	3	2	2	2	1	1	1	1	1	1	1	1	1	1	1
01-01-03-02-02-02-02.mp4	AV	Speech	Happy	Strong	Dogs	R2	A2	1	1	3	2	2	2	2	1	1	1	1	1	1	1	1	1	1
01-01-03-02-02-02-03.mp4	AV	Speech	Happy	Strong	Dogs	R2	A3	1	1	3	2	2	2	3	1	1	1	1	1	1	1	1	1	1
01-01-03-02-02-02-04.mp4	AV	Speech	Happy	Strong	Dogs	R2	A4	1	1	3	2	2	2	4	0	1	1	1	1	0	1	1	1	1
01-01-03-02-02-02-05.mp4	AV	Speech	Happy	Strong	Dogs	R2	A5	1	1	3	2	2	2	5	1	1	0	1	1	1	1	1	1	0
01-01-03-02-02-02-06.mp4	AV	Speech	Happy	Strong	Dogs	R2	A6	1	1	3	2	2	2	6	0	1	1	1	1	1	1	1	1	1
01-01-03-02-02-02-07.mp4	AV	Speech	Happy	Strong	Dogs	R2	A7	1	1	3	2	2	2	7	1	1	1	1	1	1	1	1	1	1
01-01-03-02-02-02-08.mp4	AV	Speech	Happy	Strong	Dogs	R2	A8	1	1	3	2	2	2	8	1	1	1	1	1	1	1	1	1	1
01-01-03-02-02-02-09.mp4	AV	Speech	Happy	Strong	Dogs	R2	A9	1	1	3	2	2	2	9	1	1	1	0	1	1	0	1	1	1
01-01-03-02-02-02-10.mp4	AV	Speech	Happy	Strong	Dogs	R2	A10	1	1	3	2	2	2	10	1	1	1	0	1	0	0	0	0	0
01-01-03-02-02-02-11.mp4	AV	Speech	Happy	Strong	Dogs	R2	A11	1	1	3	2	2	2	11	1	1	1	0	1	1	1	1	1	1
01-01-03-02-02-02-12.mp4	AV	Speech	Happy	Strong	Dogs	R2	A12	1	1	3	2	2	2	12	1	1	1	1	1	1	1	1	1	1
01-01-03-02-02-02-13.mp4	AV	Speech	Happy	Strong	Dogs	R2	A13	1	1	3	2	2	2	13	1	1	1	1	1	1	1	1	0	0
01-01-03-02-02-02-14.mp4	AV	Speech	Happy	Strong	Dogs	R2	A14	1	1	3	2	2	2	14	1	0	1	1	1	1	1	1	1	1
01-01-03-02-02-02-15.mp4	AV	Speech	Happy	Strong	Dogs	R2	A15	1	1	3	2	2	2	15	1	1	1	1	1	1	1	1	1	1
01-01-03-02-02-02-16.mp4	AV	Speech	Happy	Strong	Dogs	R2	A16	1	1	3	2	2	2	16	1	1	1	1	1	1	1	1	1	1
01-01-03-02-02-02-17.mp4	AV	Speech	Happy	Strong	Dogs	R2	A17	1	1	3	2	2	2	17	0	1	1	1	1	0	1	0	1	1
01-01-03-02-02-02-18.mp4	AV	Speech	Happy	Strong	Dogs	R2	A18	1	1	3	2	2	2	18	1	1	1	0	1	1	1	1	0	1
01-01-03-02-02-02-19.mp4	AV	Speech	Happy	Strong	Dogs	R2	A19	1	1	3	2	2	2	19	1	1	1	0	1	1	1	1	1	1
01-01-03-02-02-02-20.mp4	AV	Speech	Happy	Strong	Dogs	R2	A20	1	1	3	2	2	2	20	1	1	1	1	0	1	1	1	0	1
01-01-03-02-02-02-21.mp4	AV	Speech	Happy	Strong	Dogs	R2	A21	1	1	3	2	2	2	21	1	1	1	1	1	1	1	1	1	1
01-01-03-02-02-02-22.mp4	AV	Speech	Happy	Strong	Dogs	R2	A22	1	1	3	2	2	2	22	1	1	1	0	1	1	1	0	0	0
01-01-03-02-02-02-23.mp4	AV	Speech	Happy	Strong	Dogs	R2	A23	1	1	3	2	2	2	23	1	0	1	1	0	0	1	1	1	0
01-01-03-02-02-02-24.mp4	AV	Speech	Happy	Strong	Dogs	R2	A24	1	1	3	2	2	2	24	1	1	0	0	1	0	1	1	1	1
01-01-04-01-01-01-01.mp4	AV	Speech	Sad	Normal	Kids	R1	A1	1	1	4	1	1	1	1	1	1	1	1	1	1	0	0	1	0
01-01-04-01-01-01-02.mp4	AV	Speech	Sad	Normal	Kids	R1	A2	1	1	4	1	1	1	2	0	1	1	0	1	1	1	1	1	1
01-01-04-01-01-01-03.mp4	AV	Speech	Sad	Normal	Kids	R1	A3	1	1	4	1	1	1	3	1	1	1	1	1	1	1	1	1	1
01-01-04-01-01-01-04.mp4	AV	Speech	Sad	Normal	Kids	R1	A4	1	1	4	1	1	1	4	0	1	0	0	1	1	0	1	0	1
01-01-04-01-01-01-05.mp4	AV	Speech	Sad	Normal	Kids	R1	A5	1	1	4	1	1	1	5	1	1	0	0	0	0	1	1	0	1
01-01-04-01-01-01-06.mp4	AV	Speech	Sad	Normal	Kids	R1	A6	1	1	4	1	1	1	6	1	1	1	1	1	1	1	1	1	1
01-01-04-01-01-01-07.mp4	AV	Speech	Sad	Normal	Kids	R1	A7	1	1	4	1	1	1	7	1	1	1	1	1	1	1	1	1	1
01-01-04-01-01-01-08.mp4	AV	Speech	Sad	Normal	Kids	R1	A8	1	1	4	1	1	1	8	1	0	1	1	1	0	1	1	1	1
01-01-04-01-01-01-09.mp4	AV	Speech	Sad	Normal	Kids	R1	A9	1	1	4	1	1	1	9	1	1	1	0	1	0	1	1	0	1
01-01-04-01-01-01-10.mp4	AV	Speech	Sad	Normal	Kids	R1	A10	1	1	4	1	1	1	10	1	1	0	1	1	1	1	1	1	1
01-01-04-01-01-01-11.mp4	AV	Speech	Sad	Normal	Kids	R1	A11	1	1	4	1	1	1	11	0	0	0	0	1	0	0	0	0	0
01-01-04-01-01-01-12.mp4	AV	Speech	Sad	Normal	Kids	R1	A12	1	1	4	1	1	1	12	1	0	1	1	1	0	1	1	1	1
01-01-04-01-01-01-13.mp4	AV	Speech	Sad	Normal	Kids	R1	A13	1	1	4	1	1	1	13	0	1	1	0	1	0	0	0	0	0
01-01-04-01-01-01-14.mp4	AV	Speech	Sad	Normal	Kids	R1	A14	1	1	4	1	1	1	14	0	0	0	1	0	0	0	0	0	0
01-01-04-01-01-01-15.mp4	AV	Speech	Sad	Normal	Kids	R1	A15	1	1	4	1	1	1	15	0	0	0	0	0	0	1	0	0	0
01-01-04-01-01-01-16.mp4	AV	Speech	Sad	Normal	Kids	R1	A16	1	1	4	1	1	1	16	0	0	0	0	0	1	0	0	0	0
01-01-04-01-01-01-17.mp4	AV	Speech	Sad	Normal	Kids	R1	A17	1	1	4	1	1	1	17	1	1	1	0	1	0	0	0	0	1
01-01-04-01-01-01-18.mp4	AV	Speech	Sad	Normal	Kids	R1	A18	1	1	4	1	1	1	18	0	1	1	1	1	1	0	1	1	1
01-01-04-01-01-01-19.mp4	AV	Speech	Sad	Normal	Kids	R1	A19	1	1	4	1	1	1	19	1	1	0	1	1	0	0	0	1	0
01-01-04-01-01-01-20.mp4	AV	Speech	Sad	Normal	Kids	R1	A20	1	1	4	1	1	1	20	1	0	0	0	0	0	1	0	0	1
01-01-04-01-01-01-21.mp4	AV	Speech	Sad	Normal	Kids	R1	A21	1	1	4	1	1	1	21	0	0	0	0	0	1	0	0	0	0
01-01-04-01-01-01-22.mp4	AV	Speech	Sad	Normal	Kids	R1	A22	1	1	4	1	1	1	22	0	1	0	0	0	0	0	0	0	0
01-01-04-01-01-01-23.mp4	AV	Speech	Sad	Normal	Kids	R1	A23	1	1	4	1	1	1	23	0	1	1	1	1	1	0	1	1	0
01-01-04-01-01-01-24.mp4	AV	Speech	Sad	Normal	Kids	R1	A24	1	1	4	1	1	1	24	1	1	1	1	1	1	1	1	0	1
01-01-04-01-01-02-01.mp4	AV	Speech	Sad	Normal	Kids	R2	A1	1	1	4	1	1	2	1	1	1	1	1	1	1	1	1	1	0
01-01-04-01-01-02-02.mp4	AV	Speech	Sad	Normal	Kids	R2	A2	1	1	4	1	1	2	2	1	1	1	1	0	1	1	0	1	0
01-01-04-01-01-02-03.mp4	AV	Speech	Sad	Normal	Kids	R2	A3	1	1	4	1	1	2	3	1	0	1	1	1	1	1	1	1	1
01-01-04-01-01-02-04.mp4	AV	Speech	Sad	Normal	Kids	R2	A4	1	1	4	1	1	2	4	1	1	0	1	0	1	1	1	1	1
01-01-04-01-01-02-05.mp4	AV	Speech	Sad	Normal	Kids	R2	A5	1	1	4	1	1	2	5	1	1	1	1	0	1	0	0	1	0
01-01-04-01-01-02-06.mp4	AV	Speech	Sad	Normal	Kids	R2	A6	1	1	4	1	1	2	6	1	1	1	1	1	1	1	1	1	0
01-01-04-01-01-02-07.mp4	AV	Speech	Sad	Normal	Kids	R2	A7	1	1	4	1	1	2	7	1	0	1	1	1	1	1	1	1	1
01-01-04-01-01-02-08.mp4	AV	Speech	Sad	Normal	Kids	R2	A8	1	1	4	1	1	2	8	0	1	1	1	1	1	1	0	0	1
01-01-04-01-01-02-09.mp4	AV	Speech	Sad	Normal	Kids	R2	A9	1	1	4	1	1	2	9	1	0	1	1	1	1	1	1	1	1
01-01-04-01-01-02-10.mp4	AV	Speech	Sad	Normal	Kids	R2	A10	1	1	4	1	1	2	10	1	1	1	1	1	1	1	1	1	1
01-01-04-01-01-02-11.mp4	AV	Speech	Sad	Normal	Kids	R2	A11	1	1	4	1	1	2	11	0	1	0	0	0	0	1	0	0	0
01-01-04-01-01-02-12.mp4	AV	Speech	Sad	Normal	Kids	R2	A12	1	1	4	1	1	2	12	1	0	1	0	1	1	0	1	0	1
01-01-04-01-01-02-13.mp4	AV	Speech	Sad	Normal	Kids	R2	A13	1	1	4	1	1	2	13	0	0	0	0	0	0	0	0	0	0
01-01-04-01-01-02-14.mp4	AV	Speech	Sad	Normal	Kids	R2	A14	1	1	4	1	1	2	14	0	0	1	0	1	0	0	0	0	0
01-01-04-01-01-02-15.mp4	AV	Speech	Sad	Normal	Kids	R2	A15	1	1	4	1	1	2	15	1	1	1	0	0	0	0	0	1	0
01-01-04-01-01-02-16.mp4	AV	Speech	Sad	Normal	Kids	R2	A16	1	1	4	1	1	2	16	1	0	0	0	1	1	1	0	0	0
01-01-04-01-01-02-17.mp4	AV	Speech	Sad	Normal	Kids	R2	A17	1	1	4	1	1	2	17	1	1	0	0	0	1	0	0	0	0
01-01-04-01-01-02-18.mp4	AV	Speech	Sad	Normal	Kids	R2	A18	1	1	4	1	1	2	18	1	0	1	1	0	0	1	0	1	1
01-01-04-01-01-02-19.mp4	AV	Speech	Sad	Normal	Kids	R2	A19	1	1	4	1	1	2	19	0	1	1	0	1	1	0	0	1	0
01-01-04-01-01-02-20.mp4	AV	Speech	Sad	Normal	Kids	R2	A20	1	1	4	1	1	2	20	1	0	1	0	1	0	0	0	1	0
01-01-04-01-01-02-21.mp4	AV	Speech	Sad	Normal	Kids	R2	A21	1	1	4	1	1	2	21	0	0	0	1	0	1	0	0	0	0
01-01-04-01-01-02-22.mp4	AV	Speech	Sad	Normal	Kids	R2	A22	1	1	4	1	1	2	22	0	1	0	1	0	0	1	1	0	1
01-01-04-01-01-02-23.mp4	AV	Speech	Sad	Normal	Kids	R2	A23	1	1	4	1	1	2	23	1	0	0	0	0	0	0	1	0	0
01-01-04-01-01-02-24.mp4	AV	Speech	Sad	Normal	Kids	R2	A24	1	1	4	1	1	2	24	1	1	1	1	1	1	1	1	1	1
01-01-04-01-02-01-01.mp4	AV	Speech	Sad	Normal	Dogs	R1	A1	1	1	4	1	2	1	1	0	0	1	1	1	0	1	0	0	0
01-01-04-01-02-01-02.mp4	AV	Speech	Sad	Normal	Dogs	R1	A2	1	1	4	1	2	1	2	1	0	1	0	0	0	1	0	1	0
01-01-04-01-02-01-03.mp4	AV	Speech	Sad	Normal	Dogs	R1	A3	1	1	4	1	2	1	3	1	1	1	1	1	1	1	1	1	1
01-01-04-01-02-01-04.mp4	AV	Speech	Sad	Normal	Dogs	R1	A4	1	1	4	1	2	1	4	1	1	0	1	1	1	1	1	1	0
01-01-04-01-02-01-05.mp4	AV	Speech	Sad	Normal	Dogs	R1	A5	1	1	4	1	2	1	5	0	1	1	0	0	0	0	0	1	0
01-01-04-01-02-01-06.mp4	AV	Speech	Sad	Normal	Dogs	R1	A6	1	1	4	1	2	1	6	1	1	1	1	0	0	1	1	1	0
01-01-04-01-02-01-07.mp4	AV	Speech	Sad	Normal	Dogs	R1	A7	1	1	4	1	2	1	7	1	0	1	0	1	1	0	1	0	0
01-01-04-01-02-01-08.mp4	AV	Speech	Sad	Normal	Dogs	R1	A8	1	1	4	1	2	1	8	1	0	1	0	1	0	1	0	1	1
01-01-04-01-02-01-09.mp4	AV	Speech	Sad	Normal	Dogs	R1	A9	1	1	4	1	2	1	9	1	1	1	1	1	1	1	1	1	1
01-01-04-01-02-01-10.mp4	AV	Speech	Sad	Normal	Dogs	R1	A10	1	1	4	1	2	1	10	0	1	1	0	1	1	1	1	0	1
01-01-04-01-02-01-11.mp4	AV	Speech	Sad	Normal	Dogs	R1	A11	1	1	4	1	2	1	11	0	0	0	1	0	1	0	0	0	0
01-01-04-01-02-01-12.mp4	AV	Speech	Sad	Normal	Dogs	R1	A12	1	1	4	1	2	1	12	1	0	1	1	1	1	1	1	1	1
01-01-04-01-02-01-13.mp4	AV	Speech	Sad	Normal	Dogs	R1	A13	1	1	4	1	2	1	13	0	0	0	1	0	1	1	0	0	0
01-01-04-01-02-01-14.mp4	AV	Speech	Sad	Normal	Dogs	R1	A14	1	1	4	1	2	1	14	0	0	0	0	0	1	1	1	0	0
01-01-04-01-02-01-15.mp4	AV	Speech	Sad	Normal	Dogs	R1	A15	1	1	4	1	2	1	15	0	1	0	0	1	0	1	0	0	0
01-01-04-01-02-01-16.mp4	AV	Speech	Sad	Normal	Dogs	R1	A16	1	1	4	1	2	1	16	0	0	0	0	0	0	0	1	0	0
01-01-04-01-02-01-17.mp4	AV	Speech	Sad	Normal	Dogs	R1	A17	1	1	4	1	2	1	17	1	1	1	1	1	0	1	1	0	1
01-01-04-01-02-01-18.mp4	AV	Speech	Sad	Normal	Dogs	R1	A18	1	1	4	1	2	1	18	1	1	1	1	1	1	1	1	1	0
01-01-04-01-02-01-19.mp4	AV	Speech	Sad	Normal	Dogs	R1	A19	1	1	4	1	2	1	19	0	1	0	1	0	0	1	1	0	1
01-01-04-01-02-01-20.mp4	AV	Speech	Sad	Normal	Dogs	R1	A20	1	1	4	1	2	1	20	1	0	1	0	1	0	0	1	0	1
01-01-04-01-02-01-21.mp4	AV	Speech	Sad	Normal	Dogs	R1	A21	1	1	4	1	2	1	21	0	0	0	0	0	0	0	0	0	0
01-01-04-01-02-01-22.mp4	AV	Speech	Sad	Normal	Dogs	R1	A22	1	1	4	1	2	1	22	1	1	1	1	1	0	0	0	1	1
01-01-04-01-02-01-23.mp4	AV	Speech	Sad	Normal	Dogs	R1	A23	1	1	4	1	2	1	23	0	0	0	0	0	0	0	0	0	1
01-01-04-01-02-01-24.mp4	AV	Speech	Sad	Normal	Dogs	R1	A24	1	1	4	1	2	1	24	0	1	1	1	0	1	0	1	1	1
01-01-04-01-02-02-01.mp4	AV	Speech	Sad	Normal	Dogs	R2	A1	1	1	4	1	2	2	1	1	0	0	1	1	1	1	0	1	1
01-01-04-01-02-02-02.mp4	AV	Speech	Sad	Normal	Dogs	R2	A2	1	1	4	1	2	2	2	1	1	0	0	1	0	0	0	0	1
01-01-04-01-02-02-03.mp4	AV	Speech	Sad	Normal	Dogs	R2	A3	1	1	4	1	2	2	3	1	1	1	1	1	1	1	1	1	1
01-01-04-01-02-02-04.mp4	AV	Speech	Sad	Normal	Dogs	R2	A4	1	1	4	1	2	2	4	1	1	0	0	1	0	1	1	0	1
01-01-04-01-02-02-05.mp4	AV	Speech	Sad	Normal	Dogs	R2	A5	1	1	4	1	2	2	5	1	0	1	0	1	1	0	0	1	0
01-01-04-01-02-02-06.mp4	AV	Speech	Sad	Normal	Dogs	R2	A6	1	1	4	1	2	2	6	1	1	1	1	1	1	1	1	1	0
01-01-04-01-02-02-07.mp4	AV	Speech	Sad	Normal	Dogs	R2	A7	1	1	4	1	2	2	7	1	1	1	1	1	1	1	1	0	0
01-01-04-01-02-02-08.mp4	AV	Speech	Sad	Normal	Dogs	R2	A8	1	1	4	1	2	2	8	1	1	0	1	1	1	1	1	0	1
01-01-04-01-02-02-09.mp4	AV	Speech	Sad	Normal	Dogs	R2	A9	1	1	4	1	2	2	9	1	1	1	1	1	1	1	1	0	1
01-01-04-01-02-02-10.mp4	AV	Speech	Sad	Normal	Dogs	R2	A10	1	1	4	1	2	2	10	1	1	1	0	1	1	1	1	0	0
01-01-04-01-02-02-11.mp4	AV	Speech	Sad	Normal	Dogs	R2	A11	1	1	4	1	2	2	11	0	0	0	0	1	1	0	0	1	1
01-01-04-01-02-02-12.mp4	AV	Speech	Sad	Normal	Dogs	R2	A12	1	1	4	1	2	2	12	0	1	1	1	1	1	1	1	1	1
01-01-04-01-02-02-13.mp4	AV	Speech	Sad	Normal	Dogs	R2	A13	1	1	4	1	2	2	13	1	0	0	0	0	0	0	0	0	0
01-01-04-01-02-02-14.mp4	AV	Speech	Sad	Normal	Dogs	R2	A14	1	1	4	1	2	2	14	0	0	1	1	0	1	0	0	1	0
01-01-04-01-02-02-15.mp4	AV	Speech	Sad	Normal	Dogs	R2	A15	1	1	4	1	2	2	15	0	1	0	1	1	0	0	0	0	0
01-01-04-01-02-02-16.mp4	AV	Speech	Sad	Normal	Dogs	R2	A16	1	1	4	1	2	2	16	1	0	1	1	0	0	1	0	0	0
01-01-04-01-02-02-17.mp4	AV	Speech	Sad	Normal	Dogs	R2	A17	1	1	4	1	2	2	17	0	1	0	1	0	1	1	1	1	1
01-01-04-01-02-02-18.mp4	AV	Speech	Sad	Normal	Dogs	R2	A18	1	1	4	1	2	2	18	1	1	1	0	1	1	1	1	1	1
01-01-04-01-02-02-19.mp4	AV	Speech	Sad	Normal	Dogs	R2	A19	1	1	4	1	2	2	19	1	0	1	1	0	1	0	1	0	1
01-01-04-01-02-02-20.mp4	AV	Speech	Sad	Normal	Dogs	R2	A20	1	1	4	1	2	2	20	1	1	0	1	0	0	0	0	0	0
01-01-04-01-02-02-21.mp4	AV	Speech	Sad	Normal	Dogs	R2	A21	1	1	4	1	2	2	21	0	0	0	0	0	1	0	0	0	0
01-01-04-01-02-02-22.mp4	AV	Speech	Sad	Normal	Dogs	R2	A22	1	1	4	1	2	2	22	1	0	1	1	0	0	0	1	1	0
01-01-04-01-02-02-23.mp4	AV	Speech	Sad	Normal	Dogs	R2	A23	1	1	4	1	2	2	23	1	1	1	0	0	1	0	1	1	1
01-01-04-01-02-02-24.mp4	AV	Speech	Sad	Normal	Dogs	R2	A24	1	1	4	1	2	2	24	0	0	1	0	1	0	1	0	0	1
01-01-04-02-01-01-01.mp4	AV	Speech	Sad	Strong	Kids	R1	A1	1	1	4	2	1	1	1	0	0	1	1	1	1	1	0	1	0
01-01-04-02-01-01-02.mp4	AV	Speech	Sad	Strong	Kids	R1	A2	1	1	4	2	1	1	2	1	1	1	0	1	0	1	1	1	1
01-01-04-02-01-01-03.mp4	AV	Speech	Sad	Strong	Kids	R1	A3	1	1	4	2	1	1	3	0	1	1	0	0	1	1	1	1	1
01-01-04-02-01-01-04.mp4	AV	Speech	Sad	Strong	Kids	R1	A4	1	1	4	2	1	1	4	1	1	1	1	1	1	0	1	1	1
01-01-04-02-01-01-05.mp4	AV	Speech	Sad	Strong	Kids	R1	A5	1	1	4	2	1	1	5	1	1	1	1	1	1	1	1	1	1
01-01-04-02-01-01-06.mp4	AV	Speech	Sad	Strong	Kids	R1	A6	1	1	4	2	1	1	6	1	1	1	1	1	1	1	1	1	1
01-01-04-02-01-01-07.mp4	AV	Speech	Sad	Strong	Kids	R1	A7	1	1	4	2	1	1	7	1	1	1	1	1	1	0	1	1	1
01-01-04-02-01-01-08.mp4	AV	Speech	Sad	Strong	Kids	R1	A8	1	1	4	2	1	1	8	1	1	1	0	1	0	1	1	0	1
01-01-04-02-01-01-09.mp4	AV	Speech	Sad	Strong	Kids	R1	A9	1	1	4	2	1	1	9	1	1	1	1	1	1	1	1	1	1
01-01-04-02-01-01-10.mp4	AV	Speech	Sad	Strong	Kids	R1	A10	1	1	4	2	1	1	10	1	1	1	1	1	1	1	1	1	1
01-01-04-02-01-01-11.mp4	AV	Speech	Sad	Strong	Kids	R1	A11	1	1	4	2	1	1	11	1	1	1	1	1	1	1	1	1	1
01-01-04-02-01-01-12.mp4	AV	Speech	Sad	Strong	Kids	R1	A12	1	1	4	2	1	1	12	1	1	0	1	1	0	0	0	0	1
01-01-04-02-01-01-13.mp4	AV	Speech	Sad	Strong	Kids	R1	A13	1	1	4	2	1	1	13	0	0	1	1	1	1	0	1	1	0
01-01-04-02-01-01-14.mp4	AV	Speech	Sad	Strong	Kids	R1	A14	1	1	4	2	1	1	14	1	1	1	1	1	1	1	1	0	1
01-01-04-02-01-01-15.mp4	AV	Speech	Sad	Strong	Kids	R1	A15	1	1	4	2	1	1	15	0	0	0	1	1	1	1	1	1	1
01-01-04-02-01-01-16.mp4	AV	Speech	Sad	Strong	Kids	R1	A16	1	1	4	2	1	1	16	1	0	1	1	1	1	1	1	1	1
01-01-04-02-01-01-17.mp4	AV	Speech	Sad	Strong	Kids	R1	A17	1	1	4	2	1	1	17	0	0	0	1	0	1	0	0	0	0
01-01-04-02-01-01-18.mp4	AV	Speech	Sad	Strong	Kids	R1	A18	1	1	4	2	1	1	18	1	1	1	1	1	1	1	1	1	1
01-01-04-02-01-01-19.mp4	AV	Speech	Sad	Strong	Kids	R1	A19	1	1	4	2	1	1	19	1	1	1	1	1	1	1	1	1	1
01-01-04-02-01-01-20.mp4	AV	Speech	Sad	Strong	Kids	R1	A20	1	1	4	2	1	1	20	1	1	1	1	1	1	1	1	1	1
01-01-04-02-01-01-21.mp4	AV	Speech	Sad	Strong	Kids	R1	A21	1	1	4	2	1	1	21	1	1	1	1	1	1	1	0	1	1
01-01-04-02-01-01-22.mp4	AV	Speech	Sad	Strong	Kids	R1	A22	1	1	4	2	1	1	22	0	0	1	1	0	1	0	0	0	1
01-01-04-02-01-01-23.mp4	AV	Speech	Sad	Strong	Kids	R1	A23	1	1	4	2	1	1	23	1	1	0	1	0	1	1	1	1	1
01-01-04-02-01-01-24.mp4	AV	Speech	Sad	Strong	Kids	R1	A24	1	1	4	2	1	1	24	1	1	1	1	1	1	1	1	1	0
01-01-04-02-01-02-01.mp4	AV	Speech	Sad	Strong	Kids	R2	A1	1	1	4	2	1	2	1	1	1	1	1	1	1	0	1	1	1
01-01-04-02-01-02-02.mp4	AV	Speech	Sad	Strong	Kids	R2	A2	1	1	4	2	1	2	2	1	1	1	0	0	0	0	1	1	0
01-01-04-02-01-02-03.mp4	AV	Speech	Sad	Strong	Kids	R2	A3	1	1	4	2	1	2	3	1	1	1	1	1	1	1	1	1	1
01-01-04-02-01-02-04.mp4	AV	Speech	Sad	Strong	Kids	R2	A4	1	1	4	2	1	2	4	1	1	1	1	1	1	1	1	1	1
01-01-04-02-01-02-05.mp4	AV	Speech	Sad	Strong	Kids	R2	A5	1	1	4	2	1	2	5	1	1	1	0	1	1	1	1	1	1
01-01-04-02-01-02-06.mp4	AV	Speech	Sad	Strong	Kids	R2	A6	1	1	4	2	1	2	6	1	1	1	1	1	1	1	1	1	1
01-01-04-02-01-02-07.mp4	AV	Speech	Sad	Strong	Kids	R2	A7	1	1	4	2	1	2	7	0	1	1	1	1	1	1	1	1	1
01-01-04-02-01-02-08.mp4	AV	Speech	Sad	Strong	Kids	R2	A8	1	1	4	2	1	2	8	1	1	1	1	1	1	1	1	1	1
01-01-04-02-01-02-09.mp4	AV	Speech	Sad	Strong	Kids	R2	A9	1	1	4	2	1	2	9	1	1	1	1	1	1	1	1	1	1
01-01-04-02-01-02-10.mp4	AV	Speech	Sad	Strong	Kids	R2	A10	1	1	4	2	1	2	10	1	1	1	1	1	1	1	1	1	1
01-01-04-02-01-02-11.mp4	AV	Speech	Sad	Strong	Kids	R2	A11	1	1	4	2	1	2	11	1	1	1	1	1	1	1	0	0	0
01-01-04-02-01-02-12.mp4	AV	Speech	Sad	Strong	Kids	R2	A12	1	1	4	2	1	2	12	0	1	1	0	0	0	1	1	0	1
01-01-04-02-01-02-13.mp4	AV	Speech	Sad	Strong	Kids	R2	A13	1	1	4	2	1	2	13	1	1	1	0	0	0	0	0	1	0
01-01-04-02-01-02-14.mp4	AV	Speech	Sad	Strong	Kids	R2	A14	1	1	4	2	1	2	14	1	1	1	1	1	1	1	1	0	1
01-01-04-02-01-02-15.mp4	AV	Speech	Sad	Strong	Kids	R2	A15	1	1	4	2	1	2	15	1	1	0	1	1	1	1	0	1	1
01-01-04-02-01-02-16.mp4	AV	Speech	Sad	Strong	Kids	R2	A16	1	1	4	2	1	2	16	1	1	1	0	1	1	1	1	1	1
01-01-04-02-01-02-17.mp4	AV	Speech	Sad	Strong	Kids	R2	A17	1	1	4	2	1	2	17	1	1	1	1	0	0	1	1	1	1
01-01-04-02-01-02-18.mp4	AV	Speech	Sad	Strong	Kids	R2	A18	1	1	4	2	1	2	18	1	1	1	1	1	1	1	1	1	1
01-01-04-02-01-02-19.mp4	AV	Speech	Sad	Strong	Kids	R2	A19	1	1	4	2	1	2	19	1	1	1	1	1	1	1	1	1	1
01-01-04-02-01-02-20.mp4	AV	Speech	Sad	Strong	Kids	R2	A20	1	1	4	2	1	2	20	1	1	0	1	1	1	0	1	1	1
01-01-04-02-01-02-21.mp4	AV	Speech	Sad	Strong	Kids	R2	A21	1	1	4	2	1	2	21	1	1	1	1	1	1	0	1	1	1
01-01-04-02-01-02-22.mp4	AV	Speech	Sad	Strong	Kids	R2	A22	1	1	4	2	1	2	22	1	0	1	0	0	0	1	0	1	1
01-01-04-02-01-02-23.mp4	AV	Speech	Sad	Strong	Kids	R2	A23	1	1	4	2	1	2	23	1	0	1	1	0	0	1	1	1	1
01-01-04-02-01-02-24.mp4	AV	Speech	Sad	Strong	Kids	R2	A24	1	1	4	2	1	2	24	1	1	1	1	1	1	1	1	0	1
01-01-04-02-02-01-01.mp4	AV	Speech	Sad	Strong	Dogs	R1	A1	1	1	4	2	2	1	1	1	1	1	1	1	1	1	1	1	1
01-01-04-02-02-01-02.mp4	AV	Speech	Sad	Strong	Dogs	R1	A2	1	1	4	2	2	1	2	1	1	1	1	1	1	1	1	1	1
01-01-04-02-02-01-03.mp4	AV	Speech	Sad	Strong	Dogs	R1	A3	1	1	4	2	2	1	3	1	1	1	1	1	1	1	1	1	1
01-01-04-02-02-01-04.mp4	AV	Speech	Sad	Strong	Dogs	R1	A4	1	1	4	2	2	1	4	1	1	1	1	1	0	1	1	1	1
01-01-04-02-02-01-05.mp4	AV	Speech	Sad	Strong	Dogs	R1	A5	1	1	4	2	2	1	5	1	1	1	1	0	0	1	1	1	1
01-01-04-02-02-01-06.mp4	AV	Speech	Sad	Strong	Dogs	R1	A6	1	1	4	2	2	1	6	1	1	1	1	1	1	1	1	1	0
01-01-04-02-02-01-07.mp4	AV	Speech	Sad	Strong	Dogs	R1	A7	1	1	4	2	2	1	7	1	1	1	1	1	1	1	1	1	1
01-01-04-02-02-01-08.mp4	AV	Speech	Sad	Strong	Dogs	R1	A8	1	1	4	2	2	1	8	1	1	1	1	1	1	1	1	0	1
01-01-04-02-02-01-09.mp4	AV	Speech	Sad	Strong	Dogs	R1	A9	1	1	4	2	2	1	9	1	1	1	1	1	1	1	1	1	1
01-01-04-02-02-01-10.mp4	AV	Speech	Sad	Strong	Dogs	R1	A10	1	1	4	2	2	1	10	1	1	0	1	1	1	1	0	1	0
01-01-04-02-02-01-11.mp4	AV	Speech	Sad	Strong	Dogs	R1	A11	1	1	4	2	2	1	11	1	1	1	1	1	1	1	1	1	1
01-01-04-02-02-01-12.mp4	AV	Speech	Sad	Strong	Dogs	R1	A12	1	1	4	2	2	1	12	1	1	0	1	1	1	0	0	0	1
01-01-04-02-02-01-13.mp4	AV	Speech	Sad	Strong	Dogs	R1	A13	1	1	4	2	2	1	13	1	1	0	0	0	1	1	1	1	0
01-01-04-02-02-01-14.mp4	AV	Speech	Sad	Strong	Dogs	R1	A14	1	1	4	2	2	1	14	1	1	1	0	0	0	1	1	1	1
01-01-04-02-02-01-15.mp4	AV	Speech	Sad	Strong	Dogs	R1	A15	1	1	4	2	2	1	15	1	1	1	1	0	1	0	0	0	1
01-01-04-02-02-01-16.mp4	AV	Speech	Sad	Strong	Dogs	R1	A16	1	1	4	2	2	1	16	1	1	0	1	1	0	1	1	0	0
01-01-04-02-02-01-17.mp4	AV	Speech	Sad	Strong	Dogs	R1	A17	1	1	4	2	2	1	17	0	0	1	0	0	0	0	1	0	1
01-01-04-02-02-01-18.mp4	AV	Speech	Sad	Strong	Dogs	R1	A18	1	1	4	2	2	1	18	1	0	1	1	1	0	1	1	1	1
01-01-04-02-02-01-19.mp4	AV	Speech	Sad	Strong	Dogs	R1	A19	1	1	4	2	2	1	19	0	1	1	1	1	1	1	1	1	1
01-01-04-02-02-01-20.mp4	AV	Speech	Sad	Strong	Dogs	R1	A20	1	1	4	2	2	1	20	1	1	1	1	1	1	1	1	1	1
01-01-04-02-02-01-21.mp4	AV	Speech	Sad	Strong	Dogs	R1	A21	1	1	4	2	2	1	21	0	1	1	1	1	1	0	1	1	1
01-01-04-02-02-01-22.mp4	AV	Speech	Sad	Strong	Dogs	R1	A22	1	1	4	2	2	1	22	0	0	0	1	1	1	1	1	1	0
01-01-04-02-02-01-23.mp4	AV	Speech	Sad	Strong	Dogs	R1	A23	1	1	4	2	2	1	23	0	1	1	0	1	0	1	1	0	0
01-01-04-02-02-01-24.mp4	AV	Speech	Sad	Strong	Dogs	R1	A24	1	1	4	2	2	1	24	1	1	1	1	1	1	1	1	1	1
01-01-04-02-02-02-01.mp4	AV	Speech	Sad	Strong	Dogs	R2	A1	1	1	4	2	2	2	1	1	1	1	1	1	1	1	1	0	1
01-01-04-02-02-02-02.mp4	AV	Speech	Sad	Strong	Dogs	R2	A2	1	1	4	2	2	2	2	0	1	1	1	1	0	1	1	1	1
01-01-04-02-02-02-03.mp4	AV	Speech	Sad	Strong	Dogs	R2	A3	1	1	4	2	2	2	3	1	1	1	1	1	1	1	1	1	1
01-01-04-02-02-02-04.mp4	AV	Speech	Sad	Strong	Dogs	R2	A4	1	1	4	2	2	2	4	1	1	1	1	1	1	1	1	1	1
01-01-04-02-02-02-05.mp4	AV	Speech	Sad	Strong	Dogs	R2	A5	1	1	4	2	2	2	5	1	1	1	1	1	1	1	1	1	1
01-01-04-02-02-02-06.mp4	AV	Speech	Sad	Strong	Dogs	R2	A6	1	1	4	2	2	2	6	1	1	1	1	1	1	1	1	1	1
01-01-04-02-02-02-07.mp4	AV	Speech	Sad	Strong	Dogs	R2	A7	1	1	4	2	2	2	7	1	1	1	1	1	1	1	1	1	1
01-01-04-02-02-02-08.mp4	AV	Speech	Sad	Strong	Dogs	R2	A8	1	1	4	2	2	2	8	1	1	1	1	0	1	0	0	1	0
01-01-04-02-02-02-09.mp4	AV	Speech	Sad	Strong	Dogs	R2	A9	1	1	4	2	2	2	9	1	1	1	1	1	1	1	1	1	1
01-01-04-02-02-02-10.mp4	AV	Speech	Sad	Strong	Dogs	R2	A10	1	1	4	2	2	2	10	1	1	1	1	1	1	1	0	1	1
01-01-04-02-02-02-11.mp4	AV	Speech	Sad	Strong	Dogs	R2	A11	1	1	4	2	2	2	11	1	1	1	1	1	1	1	1	1	1
01-01-04-02-02-02-12.mp4	AV	Speech	Sad	Strong	Dogs	R2	A12	1	1	4	2	2	2	12	0	1	0	0	0	0	1	0	0	0
01-01-04-02-02-02-13.mp4	AV	Speech	Sad	Strong	Dogs	R2	A13	1	1	4	2	2	2	13	1	0	0	1	1	0	0	0	0	1
01-01-04-02-02-02-14.mp4	AV	Speech	Sad	Strong	Dogs	R2	A14	1	1	4	2	2	2	14	1	1	0	1	1	1	1	0	1	1
01-01-04-02-02-02-15.mp4	AV	Speech	Sad	Strong	Dogs	R2	A15	1	1	4	2	2	2	15	1	1	1	1	1	0	1	0	1	1
01-01-04-02-02-02-16.mp4	AV	Speech	Sad	Strong	Dogs	R2	A16	1	1	4	2	2	2	16	1	1	0	1	0	1	0	1	1	1
01-01-04-02-02-02-17.mp4	AV	Speech	Sad	Strong	Dogs	R2	A17	1	1	4	2	2	2	17	0	0	1	0	0	0	0	0	0	1
01-01-04-02-02-02-18.mp4	AV	Speech	Sad	Strong	Dogs	R2	A18	1	1	4	2	2	2	18	1	1	1	1	1	1	1	1	1	1
01-01-04-02-02-02-19.mp4	AV	Speech	Sad	Strong	Dogs	R2	A19	1	1	4	2	2	2	19	1	1	1	1	1	1	1	1	1	1
01-01-04-02-02-02-20.mp4	AV	Speech	Sad	Strong	Dogs	R2	A20	1	1	4	2	2	2	20	1	1	1	1	1	1	1	0	1	1
01-01-04-02-02-02-21.mp4	AV	Speech	Sad	Strong	Dogs	R2	A21	1	1	4	2	2	2	21	1	1	1	1	1	0	1	0	1	1
01-01-04-02-02-02-22.mp4	AV	Speech	Sad	Strong	Dogs	R2	A22	1	1	4	2	2	2	22	1	0	1	0	0	0	0	0	1	0
01-01-04-02-02-02-23.mp4	AV	Speech	Sad	Strong	Dogs	R2	A23	1	1	4	2	2	2	23	0	1	0	1	0	1	1	1	0	1
01-01-04-02-02-02-24.mp4	AV	Speech	Sad	Strong	Dogs	R2	A24	1	1	4	2	2	2	24	1	1	0	1	0	1	1	1	1	1
01-01-05-01-01-01-01.mp4	AV	Speech	Angry	Normal	Kids	R1	A1	1	1	5	1	1	1	1	0	1	1	1	1	1	1	1	1	1
01-01-05-01-01-01-02.mp4	AV	Speech	Angry	Normal	Kids	R1	A2	1	1	5	1	1	1	2	1	0	1	1	0	1	0	1	0	0
01-01-05-01-01-01-03.mp4	AV	Speech	Angry	Normal	Kids	R1	A3	1	1	5	1	1	1	3	1	0	1	1	1	1	1	1	1	1
01-01-05-01-01-01-04.mp4	AV	Speech	Angry	Normal	Kids	R1	A4	1	1	5	1	1	1	4	1	0	1	1	1	1	0	1	1	1
01-01-05-01-01-01-05.mp4	AV	Speech	Angry	Normal	Kids	R1	A5	1	1	5	1	1	1	5	1	1	1	1	1	1	1	1	0	1
01-01-05-01-01-01-06.mp4	AV	Speech	Angry	Normal	Kids	R1	A6	1	1	5	1	1	1	6	1	1	1	0	1	1	0	1	1	1
01-01-05-01-01-01-07.mp4	AV	Speech	Angry	Normal	Kids	R1	A7	1	1	5	1	1	1	7	1	1	1	1	1	0	1	1	1	1
01-01-05-01-01-01-08.mp4	AV	Speech	Angry	Normal	Kids	R1	A8	1	1	5	1	1	1	8	0	0	0	0	0	0	0	1	0	0
01-01-05-01-01-01-09.mp4	AV	Speech	Angry	Normal	Kids	R1	A9	1	1	5	1	1	1	9	1	1	1	1	1	1	0	1	1	1
01-01-05-01-01-01-10.mp4	AV	Speech	Angry	Normal	Kids	R1	A10	1	1	5	1	1	1	10	0	1	1	0	1	0	0	1	0	1
01-01-05-01-01-01-11.mp4	AV	Speech	Angry	Normal	Kids	R1	A11	1	1	5	1	1	1	11	1	0	1	1	1	1	1	1	0	1
01-01-05-01-01-01-12.mp4	AV	Speech	Angry	Normal	Kids	R1	A12	1	1	5	1	1	1	12	1	1	1	1	1	1	1	1	1	1
01-01-05-01-01-01-13.mp4	AV	Speech	Angry	Normal	Kids	R1	A13	1	1	5	1	1	1	13	1	1	1	1	1	1	1	1	1	0
01-01-05-01-01-01-14.mp4	AV	Speech	Angry	Normal	Kids	R1	A14	1	1	5	1	1	1	14	0	1	1	0	1	1	1	1	1	1
01-01-05-01-01-01-15.mp4	AV	Speech	Angry	Normal	Kids	R1	A15	1	1	5	1	1	1	15	1	1	1	0	1	0	1	1	1	1
01-01-05-01-01-01-16.mp4	AV	Speech	Angry	Normal	Kids	R1	A16	1	1	5	1	1	1	16	1	1	0	1	1	1	1	1	1	1
01-01-05-01-01-01-17.mp4	AV	Speech	Angry	Normal	Kids	R1	A17	1	1	5	1	1	1	17	0	1	0	1	0	0	0	1	0	1
01-01-05-01-01-01-18.mp4	AV	Speech	Angry	Normal	Kids	R1	A18	1	1	5	1	1	1	18	1	1	1	1	1	1	1	1	1	1
01-01-05-01-01-01-19.mp4	AV	Speech	Angry	Normal	Kids	R1	A19	1	1	5	1	1	1	19	0	1	1	1	1	1	1	1	1	0
01-01-05-01-01-01-20.mp4	AV	Speech	Angry	Normal	Kids	R1	A20	1	1	5	1	1	1	20	1	1	1	1	1	0	0	1	0	1
01-01-05-01-01-01-21.mp4	AV	Speech	Angry	Normal	Kids	R1	A21	1	1	5	1	1	1	21	1	1	1	1	1	1	1	1	1	1
01-01-05-01-01-01-22.mp4	AV	Speech	Angry	Normal	Kids	R1	A22	1	1	5	1	1	1	22	0	1	1	1	1	1	1	0	1	0
01-01-05-01-01-01-23.mp4	AV	Speech	Angry	Normal	Kids	R1	A23	1	1	5	1	1	1	23	1	1	0	0	0	0	0	0	0	0
01-01-05-01-01-01-24.mp4	AV	Speech	Angry	Normal	Kids	R1	A24	1	1	5	1	1	1	24	1	1	1	1	1	1	1	1	1	1
01-01-05-01-01-02-01.mp4	AV	Speech	Angry	Normal	Kids	R2	A1	1	1	5	1	1	2	1	1	1	1	1	1	1	1	1	0	1
01-01-05-01-01-02-02.mp4	AV	Speech	Angry	Normal	Kids	R2	A2	1	1	5	1	1	2	2	1	1	1	0	1	1	1	1	1	1
01-01-05-01-01-02-03.mp4	AV	Speech	Angry	Normal	Kids	R2	A3	1	1	5	1	1	2	3	1	1	1	1	1	1	1	1	1	1
01-01-05-01-01-02-04.mp4	AV	Speech	Angry	Normal	Kids	R2	A4	1	1	5	1	1	2	4	1	0	1	1	1	1	1	1	0	1
01-01-05-01-01-02-05.mp4	AV	Speech	Angry	Normal	Kids	R2	A5	1	1	5	1	1	2	5	1	1	1	1	1	1	1	1	0	1
01-01-05-01-01-02-06.mp4	AV	Speech	Angry	Normal	Kids	R2	A6	1	1	5	1	1	2	6	1	0	1	0	1	1	1	1	1	1
01-01-05-01-01-02-07.mp4	AV	Speech	Angry	Normal	Kids	R2	A7	1	1	5	1	1	2	7	0	1	1	1	1	1	1	1	1	1
01-01-05-01-01-02-08.mp4	AV	Speech	Angry	Normal	Kids	R2	A8	1	1	5	1	1	2	8	0	1	0	0	1	0	0	1	1	1
01-01-05-01-01-02-09.mp4	AV	Speech	Angry	Normal	Kids	R2	A9	1	1	5	1	1	2	9	1	1	1	1	1	1	1	0	1	1
01-01-05-01-01-02-10.mp4	AV	Speech	Angry	Normal	Kids	R2	A10	1	1	5	1	1	2	10	1	1	1	1	1	1	1	1	0	1
01-01-05-01-01-02-11.mp4	AV	Speech	Angry	Normal	Kids	R2	A11	1	1	5	1	1	2	11	0	1	0	1	1	1	1	1	1	1
01-01-05-01-01-02-12.mp4	AV	Speech	Angry	Normal	Kids	R2	A12	1	1	5	1	1	2	12	1	1	1	0	0	1	1	1	1	0
01-01-05-01-01-02-13.mp4	AV	Speech	Angry	Normal	Kids	R2	A13	1	1	5	1	1	2	13	1	1	0	1	1	1	1	1	1	0
01-01-05-01-01-02-14.mp4	AV	Speech	Angry	Normal	Kids	R2	A14	1	1	5	1	1	2	14	1	1	1	0	1	1	1	1	1	1
01-01-05-01-01-02-15.mp4	AV	Speech	Angry	Normal	Kids	R2	A15	1	1	5	1	1	2	15	1	0	1	1	1	0	1	1	1	0
01-01-05-01-01-02-16.mp4	AV	Speech	Angry	Normal	Kids	R2	A16	1	1	5	1	1	2	16	0	1	1	1	1	1	1	1	1	1
01-01-05-01-01-02-17.mp4	AV	Speech	Angry	Normal	Kids	R2	A17	1	1	5	1	1	2	17	1	1	1	0	1	0	0	1	1	1
01-01-05-01-01-02-18.mp4	AV	Speech	Angry	Normal	Kids	R2	A18	1	1	5	1	1	2	18	1	1	1	1	1	1	1	1	0	1
01-01-05-01-01-02-19.mp4	AV	Speech	Angry	Normal	Kids	R2	A19	1	1	5	1	1	2	19	1	1	1	0	1	1	1	1	1	1
01-01-05-01-01-02-20.mp4	AV	Speech	Angry	Normal	Kids	R2	A20	1	1	5	1	1	2	20	1	0	1	1	1	1	1	0	1	1
01-01-05-01-01-02-21.mp4	AV	Speech	Angry	Normal	Kids	R2	A21	1	1	5	1	1	2	21	1	1	1	1	1	1	1	0	1	0
01-01-05-01-01-02-22.mp4	AV	Speech	Angry	Normal	Kids	R2	A22	1	1	5	1	1	2	22	0	0	1	1	0	1	1	0	0	1
01-01-05-01-01-02-23.mp4	AV	Speech	Angry	Normal	Kids	R2	A23	1	1	5	1	1	2	23	0	1	0	1	0	0	0	1	1	0
01-01-05-01-01-02-24.mp4	AV	Speech	Angry	Normal	Kids	R2	A24	1	1	5	1	1	2	24	1	0	1	1	0	1	0	1	1	1
01-01-05-01-02-01-01.mp4	AV	Speech	Angry	Normal	Dogs	R1	A1	1	1	5	1	2	1	1	0	0	0	0	0	0	0	0	0	0
01-01-05-01-02-01-02.mp4	AV	Speech	Angry	Normal	Dogs	R1	A2	1	1	5	1	2	1	2	0	1	0	0	0	1	0	1	0	0
01-01-05-01-02-01-03.mp4	AV	Speech	Angry	Normal	Dogs	R1	A3	1	1	5	1	2	1	3	1	1	1	1	1	1	0	1	1	1
01-01-05-01-02-01-04.mp4	AV	Speech	Angry	Normal	Dogs	R1	A4	1	1	5	1	2	1	4	1	1	1	1	1	0	1	1	1	1
01-01-05-01-02-01-05.mp4	AV	Speech	Angry	Normal	Dogs	R1	A5	1	1	5	1	2	1	5	1	0	0	0	0	0	1	1	0	1
01-01-05-01-02-01-06.mp4	AV	Speech	Angry	Normal	Dogs	R1	A6	1	1	5	1	2	1	6	1	1	1	0	1	1	1	1	1	1
01-01-05-01-02-01-07.mp4	AV	Speech	Angry	Normal	Dogs	R1	A7	1	1	5	1	2	1	7	1	0	1	1	1	1	1	1	1	1
01-01-05-01-02-01-08.mp4	AV	Speech	Angry	Normal	Dogs	R1	A8	1	1	5	1	2	1	8	0	0	1	1	1	0	1	0	0	0
01-01-05-01-02-01-09.mp4	AV	Speech	Angry	Normal	Dogs	R1	A9	1	1	5	1	2	1	9	1	1	1	1	1	1	1	1	1	1
01-01-05-01-02-01-10.mp4	AV	Speech	Angry	Normal	Dogs	R1	A10	1	1	5	1	2	1	10	1	1	1	1	1	1	1	1	1	1
01-01-05-01-02-01-11.mp4	AV	Speech	Angry	Normal	Dogs	R1	A11	1	1	5	1	2	1	11	1	1	1	1	1	0	0	1	0	1
01-01-05-01-02-01-12.mp4	AV	Speech	Angry	Normal	Dogs	R1	A12	1	1	5	1	2	1	12	1	1	1	1	0	0	0	1	0	1
01-01-05-01-02-01-13.mp4	AV	Speech	Angry	Normal	Dogs	R1	A13	1	1	5	1	2	1	13	0	1	1	1	1	1	1	1	1	0
01-01-05-01-02-01-14.mp4	AV	Speech	Angry	Normal	Dogs	R1	A14	1	1	5	1	2	1	14	1	1	1	1	1	1	1	1	0	1
01-01-05-01-02-01-15.mp4	AV	Speech	Angry	Normal	Dogs	R1	A15	1	1	5	1	2	1	15	0	1	1	1	1	1	1	1	1	1
01-01-05-01-02-01-16.mp4	AV	Speech	Angry	Normal	Dogs	R1	A16	1	1	5	1	2	1	16	0	1	1	0	0	1	1	0	1	0
01-01-05-01-02-01-17.mp4	AV	Speech	Angry	Normal	Dogs	R1	A17	1	1	5	1	2	1	17	0	0	0	1	1	1	1	1	0	0
01-01-05-01-02-01-18.mp4	AV	Speech	Angry	Normal	Dogs	R1	A18	1	1	5	1	2	1	18	1	1	0	1	1	1	1	1	1	1
01-01-05-01-02-01-19.mp4	AV	Speech	Angry	Normal	Dogs	R1	A19	1	1	5	1	2	1	19	0	1	0	1	0	0	0	0	0	0
01-01-05-01-02-01-20.mp4	AV	Speech	Angry	Normal	Dogs	R1	A20	1	1	5	1	2	1	20	1	1	1	1	1	0	1	1	1	1
01-01-05-01-02-01-21.mp4	AV	Speech	Angry	Normal	Dogs	R1	A21	1	1	5	1	2	1	21	1	1	0	1	1	1	1	1	0	0
01-01-05-01-02-01-22.mp4	AV	Speech	Angry	Normal	Dogs	R1	A22	1	1	5	1	2	1	22	1	1	1	0	1	0	1	0	1	0
01-01-05-01-02-01-23.mp4	AV	Speech	Angry	Normal	Dogs	R1	A23	1	1	5	1	2	1	23	0	0	1	0	0	0	1	0	0	1
01-01-05-01-02-01-24.mp4	AV	Speech	Angry	Normal	Dogs	R1	A24	1	1	5	1	2	1	24	0	0	1	1	1	0	1	1	1	1
01-01-05-01-02-02-01.mp4	AV	Speech	Angry	Normal	Dogs	R2	A1	1	1	5	1	2	2	1	0	1	1	1	1	1	1	1	1	1
01-01-05-01-02-02-02.mp4	AV	Speech	Angry	Normal	Dogs	R2	A2	1	1	5	1	2	2	2	0	1	1	0	0	1	0	0	0	1
01-01-05-01-02-02-03.mp4	AV	Speech	Angry	Normal	Dogs	R2	A3	1	1	5	1	2	2	3	1	1	1	1	1	1	0	1	1	1
01-01-05-01-02-02-04.mp4	AV	Speech	Angry	Normal	Dogs	R2	A4	1	1	5	1	2	2	4	1	1	0	0	1	0	1	0	1	1
01-01-05-01-02-02-05.mp4	AV	Speech	Angry	Normal	Dogs	R2	A5	1	1	5	1	2	2	5	1	1	1	1	1	1	1	1	1	1
01-01-05-01-02-02-06.mp4	AV	Speech	Angry	Normal	Dogs	R2	A6	1	1	5	1	2	2	6	1	1	0	0	1	1	1	1	1	1
01-01-05-01-02-02-07.mp4	AV	Speech	Angry	Normal	Dogs	R2	A7	1	1	5	1	2	2	7	1	1	1	1	1	1	1	1	1	1
01-01-05-01-02-02-08.mp4	AV	Speech	Angry	Normal	Dogs	R2	A8	1	1	5	1	2	2	8	1	1	0	0	1	1	1	1	0	0
01-01-05-01-02-02-09.mp4	AV	Speech	Angry	Normal	Dogs	R2	A9	1	1	5	1	2	2	9	1	1	1	1	1	1	0	1	0	1
01-01-05-01-02-02-10.mp4	AV	Speech	Angry	Normal	Dogs	R2	A10	1	1	5	1	2	2	10	1	0	1	1	1	1	1	0	1	1
01-01-05-01-02-02-11.mp4	AV	Speech	Angry	Normal	Dogs	R2	A11	1	1	5	1	2	2	11	1	1	1	1	1	1	1	1	1	1
01-01-05-01-02-02-12.mp4	AV	Speech	Angry	Normal	Dogs	R2	A12	1	1	5	1	2	2	12	0	1	1	1	1	1	1	1	1	1
01-01-05-01-02-02-13.mp4	AV	Speech	Angry	Normal	Dogs	R2	A13	1	1	5	1	2	2	13	0	1	1	1	1	1	1	1	1	1
01-01-05-01-02-02-14.mp4	AV	Speech	Angry	Normal	Dogs	R2	A14	1	1	5	1	2	2	14	1	1	1	1	1	1	1	1	1	1
01-01-05-01-02-02-15.mp4	AV	Speech	Angry	Normal	Dogs	R2	A15	1	1	5	1	2	2	15	1	1	1	0	1	1	1	0	1	1
01-01-05-01-02-02-16.mp4	AV	Speech	Angry	Normal	Dogs	R2	A16	1	1	5	1	2	2	16	1	1	1	1	1	1	1	1	1	1
01-01-05-01-02-02-17.mp4	AV	Speech	Angry	Normal	Dogs	R2	A17	1	1	5	1	2	2	17	1	1	1	1	1	1	0	1	1	1
01-01-05-01-02-02-18.mp4	AV	Speech	Angry	Normal	Dogs	R2	A18	1	1	5	1	2	2	18	1	1	1	1	1	1	1	1	1	1
01-01-05-01-02-02-19.mp4	AV	Speech	Angry	Normal	Dogs	R2	A19	1	1	5	1	2	2	19	0	1	1	0	1	1	1	1	1	0
01-01-05-01-02-02-20.mp4	AV	Speech	Angry	Normal	Dogs	R2	A20	1	1	5	1	2	2	20	0	1	0	1	1	0	1	0	1	1
01-01-05-01-02-02-21.mp4	AV	Speech	Angry	Normal	Dogs	R2	A21	1	1	5	1	2	2	21	1	1	0	0	1	1	0	0	0	0
01-01-05-01-02-02-22.mp4	AV	Speech	Angry	Normal	Dogs	R2	A22	1	1	5	1	2	2	22	1	1	0	0	1	1	0	0	1	1
01-01-05-01-02-02-23.mp4	AV	Speech	Angry	Normal	Dogs	R2	A23	1	1	5	1	2	2	23	1	0	1	1	0	0	1	1	0	0
01-01-05-01-02-02-24.mp4	AV	Speech	Angry	Normal	Dogs	R2	A24	1	1	5	1	2	2	24	1	1	1	1	1	1	0	1	0	1
01-01-05-02-01-01-01.mp4	AV	Speech	Angry	Strong	Kids	R1	A1	1	1	5	2	1	1	1	1	1	1	1	1	1	1	1	1	1
01-01-05-02-01-01-02.mp4	AV	Speech	Angry	Strong	Kids	R1	A2	1	1	5	2	1	1	2	1	1	1	1	1	1	1	1	1	1
01-01-05-02-01-01-03.mp4	AV	Speech	Angry	Strong	Kids	R1	A3	1	1	5	2	1	1	3	1	1	1	0	1	1	1	1	1	1
01-01-05-02-01-01-04.mp4	AV	Speech	Angry	Strong	Kids	R1	A4	1	1	5	2	1	1	4	1	1	1	1	1	1	1	1	1	1
01-01-05-02-01-01-05.mp4	AV	Speech	Angry	Strong	Kids	R1	A5	1	1	5	2	1	1	5	1	1	1	1	0	1	1	1	0	1
01-01-05-02-01-01-06.mp4	AV	Speech	Angry	Strong	Kids	R1	A6	1	1	5	2	1	1	6	1	1	1	1	1	1	1	1	1	1
01-01-05-02-01-01-07.mp4	AV	Speech	Angry	Strong	Kids	R1	A7	1	1	5	2	1	1	7	1	1	1	1	1	1	1	1	1	1
01-01-05-02-01-01-08.mp4	AV	Speech	Angry	Strong	Kids	R1	A8	1	1	5	2	1	1	8	1	0	1	1	0	0	1	0	1	1
01-01-05-02-01-01-09.mp4	AV	Speech	Angry	Strong	Kids	R1	A9	1	1	5	2	1	1	9	1	1	1	1	0	1	1	1	1	1
01-01-05-02-01-01-10.mp4	AV	Speech	Angry	Strong	Kids	R1	A10	1	1	5	2	1	1	10	1	1	1	1	0	1	1	0	1	1
01-01-05-02-01-01-11.mp4	AV	Speech	Angry	Strong	Kids	R1	A11	1	1	5	2	1	1	11	1	1	1	1	1	1	1	1	1	1
01-01-05-02-01-01-12.mp4	AV	Speech	Angry	Strong	Kids	R1	A12	1	1	5	2	1	1	12	1	1	1	1	1	1	1	1	1	1
01-01-05-02-01-01-13.mp4	AV	Speech	Angry	Strong	Kids	R1	A13	1	1	5	2	1	1	13	1	1	1	1	1	1	1	1	1	1
01-01-05-02-01-01-14.mp4	AV	Speech	Angry	Strong	Kids	R1	A14	1	1	5	2	1	1	14	1	1	1	1	1	1	1	1	1	1
01-01-05-02-01-01-15.mp4	AV	Speech	Angry	Strong	Kids	R1	A15	1	1	5	2	1	1	15	1	1	1	1	1	1	1	1	1	1
01-01-05-02-01-01-16.mp4	AV	Speech	Angry	Strong	Kids	R1	A16	1	1	5	2	1	1	16	1	1	0	1	1	1	1	1	1	0
01-01-05-02-01-01-17.mp4	AV	Speech	Angry	Strong	Kids	R1	A17	1	1	5	2	1	1	17	1	1	1	1	1	1	1	1	1	1
01-01-05-02-01-01-18.mp4	AV	Speech	Angry	Strong	Kids	R1	A18	1	1	5	2	1	1	18	1	1	1	1	1	1	0	1	1	1
01-01-05-02-01-01-19.mp4	AV	Speech	Angry	Strong	Kids	R1	A19	1	1	5	2	1	1	19	1	1	1	1	1	1	1	1	1	1
01-01-05-02-01-01-20.mp4	AV	Speech	Angry	Strong	Kids	R1	A20	1	1	5	2	1	1	20	1	1	1	1	1	1	1	1	1	1
01-01-05-02-01-01-21.mp4	AV	Speech	Angry	Strong	Kids	R1	A21	1	1	5	2	1	1	21	1	1	1	1	1	1	1	1	1	0
01-01-05-02-01-01-22.mp4	AV	Speech	Angry	Strong	Kids	R1	A22	1	1	5	2	1	1	22	1	1	1	1	1	0	1	1	1	1
01-01-05-02-01-01-23.mp4	AV	Speech	Angry	Strong	Kids	R1	A23	1	1	5	2	1	1	23	1	1	1	1	1	1	1	1	1	1
01-01-05-02-01-01-24.mp4	AV	Speech	Angry	Strong	Kids	R1	A24	1	1	5	2	1	1	24	1	1	1	1	1	1	0	1	1	1
01-01-05-02-01-02-01.mp4	AV	Speech	Angry	Strong	Kids	R2	A1	1	1	5	2	1	2	1	0	1	1	1	1	1	1	1	1	1
01-01-05-02-01-02-02.mp4	AV	Speech	Angry	Strong	Kids	R2	A2	1	1	5	2	1	2	2	1	1	1	1	1	1	1	1	1	1
01-01-05-02-01-02-03.mp4	AV	Speech	Angry	Strong	Kids	R2	A3	1	1	5	2	1	2	3	1	0	1	1	1	1	1	1	1	1
01-01-05-02-01-02-04.mp4	AV	Speech	Angry	Strong	Kids	R2	A4	1	1	5	2	1	2	4	1	1	0	1	1	1	1	1	1	0
01-01-05-02-01-02-05.mp4	AV	Speech	Angry	Strong	Kids	R2	A5	1	1	5	2	1	2	5	1	1	1	1	1	1	1	1	1	1
01-01-05-02-01-02-06.mp4	AV	Speech	Angry	Strong	Kids	R2	A6	1	1	5	2	1	2	6	1	1	1	1	1	1	1	1	1	1
01-01-05-02-01-02-07.mp4	AV	Speech	Angry	Strong	Kids	R2	A7	1	1	5	2	1	2	7	1	1	1	1	1	1	1	1	1	1
01-01-05-02-01-02-08.mp4	AV	Speech	Angry	Strong	Kids	R2	A8	1	1	5	2	1	2	8	1	1	1	1	1	1	1	1	0	1
01-01-05-02-01-02-09.mp4	AV	Speech	Angry	Strong	Kids	R2	A9	1	1	5	2	1	2	9	1	1	1	1	1	1	1	1	1	1
01-01-05-02-01-02-10.mp4	AV	Speech	Angry	Strong	Kids	R2	A10	1	1	5	2	1	2	10	1	1	1	1	1	1	1	1	1	0
01-01-05-02-01-02-11.mp4	AV	Speech	Angry	Strong	Kids	R2	A11	1	1	5	2	1	2	11	0	1	1	1	1	1	1	1	1	1
01-01-05-02-01-02-12.mp4	AV	Speech	Angry	Strong	Kids	R2	A12	1	1	5	2	1	2	12	1	1	1	1	1	1	1	1	0	1
01-01-05-02-01-02-13.mp4	AV	Speech	Angry	Strong	Kids	R2	A13	1	1	5	2	1	2	13	1	1	1	1	1	1	1	1	1	1
01-01-05-02-01-02-14.mp4	AV	Speech	Angry	Strong	Kids	R2	A14	1	1	5	2	1	2	14	1	1	1	1	1	1	1	1	1	1
01-01-05-02-01-02-15.mp4	AV	Speech	Angry	Strong	Kids	R2	A15	1	1	5	2	1	2	15	1	1	1	1	1	1	1	1	1	1
01-01-05-02-01-02-16.mp4	AV	Speech	Angry	Strong	Kids	R2	A16	1	1	5	2	1	2	16	1	1	1	1	1	1	1	1	1	1
01-01-05-02-01-02-17.mp4	AV	Speech	Angry	Strong	Kids	R2	A17	1	1	5	2	1	2	17	1	1	1	1	1	1	1	1	1	1
01-01-05-02-01-02-18.mp4	AV	Speech	Angry	Strong	Kids	R2	A18	1	1	5	2	1	2	18	1	1	1	1	1	1	1	0	1	1
01-01-05-02-01-02-19.mp4	AV	Speech	Angry	Strong	Kids	R2	A19	1	1	5	2	1	2	19	1	1	1	1	1	1	1	1	1	1
01-01-05-02-01-02-20.mp4	AV	Speech	Angry	Strong	Kids	R2	A20	1	1	5	2	1	2	20	1	1	1	1	1	1	1	1	1	1
01-01-05-02-01-02-21.mp4	AV	Speech	Angry	Strong	Kids	R2	A21	1	1	5	2	1	2	21	1	0	1	1	1	1	0	1	0	0
01-01-05-02-01-02-22.mp4	AV	Speech	Angry	Strong	Kids	R2	A22	1	1	5	2	1	2	22	1	1	1	0	1	1	1	0	1	1
01-01-05-02-01-02-23.mp4	AV	Speech	Angry	Strong	Kids	R2	A23	1	1	5	2	1	2	23	1	1	1	1	1	0	1	1	1	1
01-01-05-02-01-02-24.mp4	AV	Speech	Angry	Strong	Kids	R2	A24	1	1	5	2	1	2	24	1	1	0	1	1	1	1	1	1	0
01-01-05-02-02-01-01.mp4	AV	Speech	Angry	Strong	Dogs	R1	A1	1	1	5	2	2	1	1	1	1	1	1	1	1	1	1	1	1
01-01-05-02-02-01-02.mp4	AV	Speech	Angry	Strong	Dogs	R1	A2	1	1	5	2	2	1	2	1	0	1	1	1	1	1	1	1	1
01-01-05-02-02-01-03.mp4	AV	Speech	Angry	Strong	Dogs	R1	A3	1	1	5	2	2	1	3	1	1	1	1	1	1	1	1	1	1
01-01-05-02-02-01-04.mp4	AV	Speech	Angry	Strong	Dogs	R1	A4	1	1	5	2	2	1	4	1	0	1	1	0	1	1	1	1	1
01-01-05-02-02-01-05.mp4	AV	Speech	Angry	Strong	Dogs	R1	A5	1	1	5	2	2	1	5	1	1	1	1	1	1	0	1	1	1
01-01-05-02-02-01-06.mp4	AV	Speech	Angry	Strong	Dogs	R1	A6	1	1	5	2	2	1	6	1	1	1	1	1	1	1	1	1	0
01-01-05-02-02-01-07.mp4	AV	Speech	Angry	Strong	Dogs	R1	A7	1	1	5	2	2	1	7	1	1	1	1	1	1	1	1	1	1
01-01-05-02-02-01-08.mp4	AV	Speech	Angry	Strong	Dogs	R1	A8	1	1	5	2	2	1	8	1	1	1	1	1	1	1	1	1	1
01-01-05-02-02-01-09.mp4	AV	Speech	Angry	Strong	Dogs	R1	A9	1	1	5	2	2	1	9	0	1	1	1	1	1	1	1	1	1
01-01-05-02-02-01-10.mp4	AV	Speech	Angry	Strong	Dogs	R1	A10	1	1	5	2	2	1	10	1	1	1	1	0	1	1	1	0	1
01-01-05-02-02-01-11.mp4	AV	Speech	Angry	Strong	Dogs	R1	A11	1	1	5	2	2	1	11	1	1	1	1	1	1	1	1	1	1
01-01-05-02-02-01-12.mp4	AV	Speech	Angry	Strong	Dogs	R1	A12	1	1	5	2	2	1	12	1	1	1	1	1	1	1	1	1	1
01-01-05-02-02-01-13.mp4	AV	Speech	Angry	Strong	Dogs	R1	A13	1	1	5	2	2	1	13	1	1	1	1	1	1	1	1	1	1
01-01-05-02-02-01-14.mp4	AV	Speech	Angry	Strong	Dogs	R1	A14	1	1	5	2	2	1	14	1	1	1	1	1	1	1	1	1	1
01-01-05-02-02-01-15.mp4	AV	Speech	Angry	Strong	Dogs	R1	A15	1	1	5	2	2	1	15	1	1	1	1	1	1	1	1	1	1
01-01-05-02-02-01-16.mp4	AV	Speech	Angry	Strong	Dogs	R1	A16	1	1	5	2	2	1	16	1	1	1	1	1	1	1	1	1	1
01-01-05-02-02-01-17.mp4	AV	Speech	Angry	Strong	Dogs	R1	A17	1	1	5	2	2	1	17	1	1	1	1	0	1	1	1	1	1
01-01-05-02-02-01-18.mp4	AV	Speech	Angry	Strong	Dogs	R1	A18	1	1	5	2	2	1	18	1	1	0	1	1	1	1	1	1	1
01-01-05-02-02-01-19.mp4	AV	Speech	Angry	Strong	Dogs	R1	A19	1	1	5	2	2	1	19	1	1	0	1	1	0	1	1	1	1
01-01-05-02-02-01-20.mp4	AV	Speech	Angry	Strong	Dogs	R1	A20	1	1	5	2	2	1	20	1	1	1	1	1	1	1	1	1	1
01-01-05-02-02-01-21.mp4	AV	Speech	Angry	Strong	Dogs	R1	A21	1	1	5	2	2	1	21	0	1	1	1	1	1	1	1	1	1
01-01-05-02-02-01-22.mp4	AV	Speech	Angry	Strong	Dogs	R1	A22	1	1	5	2	2	1	22	1	1	1	1	1	1	1	1	1	1
01-01-05-02-02-01-23.mp4	AV	Speech	Angry	Strong	Dogs	R1	A23	1	1	5	2	2	1	23	1	1	1	1	1	1	1	1	1	1
01-01-05-02-02-01-24.mp4	AV	Speech	Angry	Strong	Dogs	R1	A24	1	1	5	2	2	1	24	1	1	1	0	1	1	1	1	1	1
01-01-05-02-02-02-01.mp4	AV	Speech	Angry	Strong	Dogs	R2	A1	1	1	5	2	2	2	1	1	1	1	1	1	1	1	1	1	1
01-01-05-02-02-02-02.mp4	AV	Speech	Angry	Strong	Dogs	R2	A2	1	1	5	2	2	2	2	1	1	1	1	1	1	1	1	1	1
01-01-05-02-02-02-03.mp4	AV	Speech	Angry	Strong	Dogs	R2	A3	1	1	5	2	2	2	3	1	1	1	1	1	1	1	1	1	1
01-01-05-02-02-02-04.mp4	AV	Speech	Angry	Strong	Dogs	R2	A4	1	1	5	2	2	2	4	1	1	0	1	1	0	1	1	0	1
01-01-05-02-02-02-05.mp4	AV	Speech	Angry	Strong	Dogs	R2	A5	1	1	5	2	2	2	5	1	1	1	1	1	0	1	1	1	1
01-01-05-02-02-02-06.mp4	AV	Speech	Angry	Strong	Dogs	R2	A6	1	1	5	2	2	2	6	1	1	1	1	1	1	1	1	1	1
01-01-05-02-02-02-07.mp4	AV	Speech	Angry	Strong	Dogs	R2	A7	1	1	5	2	2	2	7	1	1	1	1	1	1	1	1	1	1
01-01-05-02-02-02-08.mp4	AV	Speech	Angry	Strong	Dogs	R2	A8	1	1	5	2	2	2	8	1	1	1	1	1	1	1	1	1	0
01-01-05-02-02-02-09.mp4	AV	Speech	Angry	Strong	Dogs	R2	A9	1	1	5	2	2	2	9	1	1	1	1	1	1	1	1	1	1
01-01-05-02-02-02-10.mp4	AV	Speech	Angry	Strong	Dogs	R2	A10	1	1	5	2	2	2	10	1	1	1	1	0	1	1	1	0	1
01-01-05-02-02-02-11.mp4	AV	Speech	Angry	Strong	Dogs	R2	A11	1	1	5	2	2	2	11	0	1	1	1	1	1	1	1	1	1
01-01-05-02-02-02-12.mp4	AV	Speech	Angry	Strong	Dogs	R2	A12	1	1	5	2	2	2	12	1	1	1	1	1	1	1	1	1	1
01-01-05-02-02-02-13.mp4	AV	Speech	Angry	Strong	Dogs	R2	A13	1	1	5	2	2	2	13	1	1	1	1	1	1	1	1	1	1
01-01-05-02-02-02-14.mp4	AV	Speech	Angry	Strong	Dogs	R2	A14	1	1	5	2	2	2	14	1	1	1	1	1	1	1	1	1	1
01-01-05-02-02-02-15.mp4	AV	Speech	Angry	Strong	Dogs	R2	A15	1	1	5	2	2	2	15	0	1	1	1	1	0	1	1	1	1
01-01-05-02-02-02-16.mp4	AV	Speech	Angry	Strong	Dogs	R2	A16	1	1	5	2	2	2	16	1	1	1	1	1	0	1	1	1	1
01-01-05-02-02-02-17.mp4	AV	Speech	Angry	Strong	Dogs	R2	A17	1	1	5	2	2	2	17	1	1	1	1	1	1	1	1	1	1
01-01-05-02-02-02-18.mp4	AV	Speech	Angry	Strong	Dogs	R2	A18	1	1	5	2	2	2	18	1	1	1	1	1	0	1	1	1	1
01-01-05-02-02-02-19.mp4	AV	Speech	Angry	Strong	Dogs	R2	A19	1	1	5	2	2	2	19	1	1	1	1	1	1	1	1	1	1
01-01-05-02-02-02-20.mp4	AV	Speech	Angry	Strong	Dogs	R2	A20	1	1	5	2	2	2	20	1	1	1	1	1	1	1	1	0	1
01-01-05-02-02-02-21.mp4	AV	Speech	Angry	Strong	Dogs	R2	A21	1	1	5	2	2	2	21	1	1	1	1	1	1	1	1	1	1
01-01-05-02-02-02-22.mp4	AV	Speech	Angry	Strong	Dogs	R2	A22	1	1	5	2	2	2	22	1	1	1	1	1	1	1	1	1	1
01-01-05-02-02-02-23.mp4	AV	Speech	Angry	Strong	Dogs	R2	A23	1	1	5	2	2	2	23	1	1	1	1	1	1	1	1	1	1
01-01-05-02-02-02-24.mp4	AV	Speech	Angry	Strong	Dogs	R2	A24	1	1	5	2	2	2	24	1	1	1	1	1	1	1	1	1	1
01-01-06-01-01-01-01.mp4	AV	Speech	Fearful	Normal	Kids	R1	A1	1	1	6	1	1	1	1	1	1	1	0	1	1	0	1	1	1
01-01-06-01-01-01-02.mp4	AV	Speech	Fearful	Normal	Kids	R1	A2	1	1	6	1	1	1	2	1	1	1	1	1	1	0	1	1	1
01-01-06-01-01-01-03.mp4	AV	Speech	Fearful	Normal	Kids	R1	A3	1	1	6	1	1	1	3	0	1	0	0	1	0	1	0	1	1
01-01-06-01-01-01-04.mp4	AV	Speech	Fearful	Normal	Kids	R1	A4	1	1	6	1	1	1	4	1	0	1	1	0	1	1	1	0	1
01-01-06-01-01-01-05.mp4	AV	Speech	Fearful	Normal	Kids	R1	A5	1	1	6	1	1	1	5	1	1	1	1	1	1	1	1	0	1
01-01-06-01-01-01-06.mp4	AV	Speech	Fearful	Normal	Kids	R1	A6	1	1	6	1	1	1	6	1	1	1	1	1	0	1	1	1	1
01-01-06-01-01-01-07.mp4	AV	Speech	Fearful	Normal	Kids	R1	A7	1	1	6	1	1	1	7	1	1	1	1	1	1	1	1	1	1
01-01-06-01-01-01-08.mp4	AV	Speech	Fearful	Normal	Kids	R1	A8	1	1	6	1	1	1	8	1	1	1	1	0	1	1	1	1	1
01-01-06-01-01-01-09.mp4	AV	Speech	Fearful	Normal	Kids	R1	A9	1	1	6	1	1	1	9	1	1	1	0	1	1	1	1	1	1
01-01-06-01-01-01-10.mp4	AV	Speech	Fearful	Normal	Kids	R1	A10	1	1	6	1	1	1	10	0	1	1	1	1	1	1	0	1	1
01-01-06-01-01-01-11.mp4	AV	Speech	Fearful	Normal	Kids	R1	A11	1	1	6	1	1	1	11	0	1	1	0	0	1	0	1	0	1
01-01-06-01-01-01-12.mp4	AV	Speech	Fearful	Normal	Kids	R1	A12	1	1	6	1	1	1	12	0	1	1	1	1	1	1	1	1	1
01-01-06-01-01-01-13.mp4	AV	Speech	Fearful	Normal	Kids	R1	A13	1	1	6	1	1	1	13	1	0	0	0	0	0	0	0	0	1
01-01-06-01-01-01-14.mp4	AV	Speech	Fearful	Normal	Kids	R1	A14	1	1	6	1	1	1	14	1	1	1	1	1	1	1	1	1	1
01-01-06-01-01-01-15.mp4	AV	Speech	Fearful	Normal	Kids	R1	A15	1	1	6	1	1	1	15	1	0	1	0	1	1	0	1	1	1
01-01-06-01-01-01-16.mp4	AV	Speech	Fearful	Normal	Kids	R1	A16	1	1	6	1	1	1	16	1	1	1	1	1	1	1	1	1	1
01-01-06-01-01-01-17.mp4	AV	Speech	Fearful	Normal	Kids	R1	A17	1	1	6	1	1	1	17	0	1	1	1	0	1	1	1	1	1
01-01-06-01-01-01-18.mp4	AV	Speech	Fearful	Normal	Kids	R1	A18	1	1	6	1	1	1	18	1	1	1	1	1	1	1	1	1	1
01-01-06-01-01-01-19.mp4	AV	Speech	Fearful	Normal	Kids	R1	A19	1	1	6	1	1	1	19	1	1	1	0	1	0	0	1	1	1
01-01-06-01-01-01-20.mp4	AV	Speech	Fearful	Normal	Kids	R1	A20	1	1	6	1	1	1	20	1	1	1	1	0	1	1	1	1	0
01-01-06-01-01-01-21.mp4	AV	Speech	Fearful	Normal	Kids	R1	A21	1	1	6	1	1	1	21	1	1	0	1	1	1	1	1	1	1
01-01-06-01-01-01-22.mp4	AV	Speech	Fearful	Normal	Kids	R1	A22	1	1	6	1	1	1	22	1	0	1	1	1	1	1	1	1	1
01-01-06-01-01-01-23.mp4	AV	Speech	Fearful	Normal	Kids	R1	A23	1	1	6	1	1	1	23	0	0	1	1	0	1	1	1	1	1
01-01-06-01-01-01-24.mp4	AV	Speech	Fearful	Normal	Kids	R1	A24	1	1	6	1	1	1	24	1	1	1	1	1	1	1	1	1	1
01-01-06-01-01-02-01.mp4	AV	Speech	Fearful	Normal	Kids	R2	A1	1	1	6	1	1	2	1	1	1	0	1	0	0	1	0	0	1
01-01-06-01-01-02-02.mp4	AV	Speech	Fearful	Normal	Kids	R2	A2	1	1	6	1	1	2	2	1	1	1	1	0	1	1	0	1	1
01-01-06-01-01-02-03.mp4	AV	Speech	Fearful	Normal	Kids	R2	A3	1	1	6	1	1	2	3	1	1	1	0	1	1	1	0	0	0
01-01-06-01-01-02-04.mp4	AV	Speech	Fearful	Normal	Kids	R2	A4	1	1	6	1	1	2	4	1	1	0	1	1	1	1	1	0	1
01-01-06-01-01-02-05.mp4	AV	Speech	Fearful	Normal	Kids	R2	A5	1	1	6	1	1	2	5	1	0	0	1	1	1	1	0	1	1
01-01-06-01-01-02-06.mp4	AV	Speech	Fearful	Normal	Kids	R2	A6	1	1	6	1	1	2	6	1	1	0	1	0	1	0	1	1	1
01-01-06-01-01-02-07.mp4	AV	Speech	Fearful	Normal	Kids	R2	A7	1	1	6	1	1	2	7	0	1	1	1	0	1	1	1	1	1
01-01-06-01-01-02-08.mp4	AV	Speech	Fearful	Normal	Kids	R2	A8	1	1	6	1	1	2	8	1	1	1	1	1	1	1	1	1	1
01-01-06-01-01-02-09.mp4	AV	Speech	Fearful	Normal	Kids	R2	A9	1	1	6	1	1	2	9	1	1	1	0	1	1	0	1	1	1
01-01-06-01-01-02-10.mp4	AV	Speech	Fearful	Normal	Kids	R2	A10	1	1	6	1	1	2	10	1	1	1	1	0	1	1	1	1	0
01-01-06-01-01-02-11.mp4	AV	Speech	Fearful	Normal	Kids	R2	A11	1	1	6	1	1	2	11	1	0	0	1	0	0	0	1	0	1
01-01-06-01-01-02-12.mp4	AV	Speech	Fearful	Normal	Kids	R2	A12	1	1	6	1	1	2	12	1	1	1	0	1	1	1	1	1	1
01-01-06-01-01-02-13.mp4	AV	Speech	Fearful	Normal	Kids	R2	A13	1	1	6	1	1	2	13	0	0	1	0	0	0	0	1	0	0
01-01-06-01-01-02-14.mp4	AV	Speech	Fearful	Normal	Kids	R2	A14	1	1	6	1	1	2	14	1	0	0	0	1	0	1	1	1	0
01-01-06-01-01-02-15.mp4	AV	Speech	Fearful	Normal	Kids	R2	A15	1	1	6	1	1	2	15	1	1	0	0	1	1	0	1	1	1
01-01-06-01-01-02-16.mp4	AV	Speech	Fearful	Normal	Kids	R2	A16	1	1	6	1	1	2	16	0	1	1	1	1	1	1	1	1	1
01-01-06-01-01-02-17.mp4	AV	Speech	Fearful	Normal	Kids	R2	A17	1	1	6	1	1	2	17	1	1	1	1	1	1	1	1	1	1
01-01-06-01-01-02-18.mp4	AV	Speech	Fearful	Normal	Kids	R2	A18	1	1	6	1	1	2	18	1	1	0	1	0	1	1	1	1	1
01-01-06-01-01-02-19.mp4	AV	Speech	Fearful	Normal	Kids	R2	A19	1	1	6	1	1	2	19	1	0	0	0	1	0	1	0	0	1
01-01-06-01-01-02-20.mp4	AV	Speech	Fearful	Normal	Kids	R2	A20	1	1	6	1	1	2	20	1	1	1	1	1	1	1	1	1	1
01-01-06-01-01-02-21.mp4	AV	Speech	Fearful	Normal	Kids	R2	A21	1	1	6	1	1	2	21	0	1	1	1	1	0	1	1	0	1
01-01-06-01-01-02-22.mp4	AV	Speech	Fearful	Normal	Kids	R2	A22	1	1	6	1	1	2	22	0	1	1	0	1	1	0	1	0	1
01-01-06-01-01-02-23.mp4	AV	Speech	Fearful	Normal	Kids	R2	A23	1	1	6	1	1	2	23	1	1	1	1	1	0	1	0	1	1
01-01-06-01-01-02-24.mp4	AV	Speech	Fearful	Normal	Kids	R2	A24	1	1	6	1	1	2	24	1	1	1	1	1	1	1	1	1	1
01-01-06-01-02-01-01.mp4	AV	Speech	Fearful	Normal	Dogs	R1	A1	1	1	6	1	2	1	1	1	1	0	1	1	0	1	1	1	1
01-01-06-01-02-01-02.mp4	AV	Speech	Fearful	Normal	Dogs	R1	A2	1	1	6	1	2	1	2	1	1	1	1	1	1	0	1	0	1
01-01-06-01-02-01-03.mp4	AV	Speech	Fearful	Normal	Dogs	R1	A3	1	1	6	1	2	1	3	1	1	1	1	1	1	1	1	1	1
01-01-06-01-02-01-04.mp4	AV	Speech	Fearful	Normal	Dogs	R1	A4	1	1	6	1	2	1	4	0	1	0	0	1	1	1	0	1	1
01-01-06-01-02-01-05.mp4	AV	Speech	Fearful	Normal	Dogs	R1	A5	1	1	6	1	2	1	5	0	0	0	1	1	1	0	1	0	0
01-01-06-01-02-01-06.mp4	AV	Speech	Fearful	Normal	Dogs	R1	A6	1	1	6	1	2	1	6	1	1	1	1	1	1	1	1	1	1
01-01-06-01-02-01-07.mp4	AV	Speech	Fearful	Normal	Dogs	R1	A7	1	1	6	1	2	1	7	1	0	0	0	0	1	1	1	1	1
01-01-06-01-02-01-08.mp4	AV	Speech	Fearful	Normal	Dogs	R1	A8	1	1	6	1	2	1	8	1	1	1	1	1	1	1	0	1	1
01-01-06-01-02-01-09.mp4	AV	Speech	Fearful	Normal	Dogs	R1	A9	1	1	6	1	2	1	9	1	1	0	1	1	1	1	1	0	1
01-01-06-01-02-01-10.mp4	AV	Speech	Fearful	Normal	Dogs	R1	A10	1	1	6	1	2	1	10	1	1	1	1	1	1	1	1	1	1
01-01-06-01-02-01-11.mp4	AV	Speech	Fearful	Normal	Dogs	R1	A11	1	1	6	1	2	1	11	0	1	1	1	1	1	0	0	1	1
01-01-06-01-02-01-12.mp4	AV	Speech	Fearful	Normal	Dogs	R1	A12	1	1	6	1	2	1	12	1	0	0	1	1	1	1	1	1	1
01-01-06-01-02-01-13.mp4	AV	Speech	Fearful	Normal	Dogs	R1	A13	1	1	6	1	2	1	13	1	0	0	0	0	0	1	0	1	0
01-01-06-01-02-01-14.mp4	AV	Speech	Fearful	Normal	Dogs	R1	A14	1	1	6	1	2	1	14	0	1	1	1	1	1	1	1	1	1
01-01-06-01-02-01-15.mp4	AV	Speech	Fearful	Normal	Dogs	R1	A15	1	1	6	1	2	1	15	0	1	1	1	0	1	1	1	1	1
01-01-06-01-02-01-16.mp4	AV	Speech	Fearful	Normal	Dogs	R1	A16	1	1	6	1	2	1	16	1	1	1	0	1	1	1	1	1	1
01-01-06-01-02-01-17.mp4	AV	Speech	Fearful	Normal	Dogs	R1	A17	1	1	6	1	2	1	17	1	1	1	1	1	1	1	1	1	1
01-01-06-01-02-01-18.mp4	AV	Speech	Fearful	Normal	Dogs	R1	A18	1	1	6	1	2	1	18	0	1	1	1	1	1	1	1	1	1
01-01-06-01-02-01-19.mp4	AV	Speech	Fearful	Normal	Dogs	R1	A19	1	1	6	1	2	1	19	1	1	1	1	1	1	1	1	1	1
01-01-06-01-02-01-20.mp4	AV	Speech	Fearful	Normal	Dogs	R1	A20	1	1	6	1	2	1	20	1	1	1	1	1	1	1	1	1	1
01-01-06-01-02-01-21.mp4	AV	Speech	Fearful	Normal	Dogs	R1	A21	1	1	6	1	2	1	21	0	0	1	1	1	1	1	1	1	1
01-01-06-01-02-01-22.mp4	AV	Speech	Fearful	Normal	Dogs	R1	A22	1	1	6	1	2	1	22	0	0	0	1	0	1	0	0	1	1
01-01-06-01-02-01-23.mp4	AV	Speech	Fearful	Normal	Dogs	R1	A23	1	1	6	1	2	1	23	0	0	1	1	0	0	1	0	1	1
01-01-06-01-02-01-24.mp4	AV	Speech	Fearful	Normal	Dogs	R1	A24	1	1	6	1	2	1	24	1	1	1	1	1	0	1	1	1	1
01-01-06-01-02-02-01.mp4	AV	Speech	Fearful	Normal	Dogs	R2	A1	1	1	6	1	2	2	1	0	1	0	0	1	1	0	1	1	1
01-01-06-01-02-02-02.mp4	AV	Speech	Fearful	Normal	Dogs	R2	A2	1	1	6	1	2	2	2	1	1	1	0	1	1	0	1	1	1
01-01-06-01-02-02-03.mp4	AV	Speech	Fearful	Normal	Dogs	R2	A3	1	1	6	1	2	2	3	1	0	1	1	1	1	1	1	1	0
01-01-06-01-02-02-04.mp4	AV	Speech	Fearful	Normal	Dogs	R2	A4	1	1	6	1	2	2	4	0	1	0	0	0	1	1	1	1	1
01-01-06-01-02-02-05.mp4	AV	Speech	Fearful	Normal	Dogs	R2	A5	1	1	6	1	2	2	5	0	1	1	1	1	1	0	1	1	1
01-01-06-01-02-02-06.mp4	AV	Speech	Fearful	Normal	Dogs	R2	A6	1	1	6	1	2	2	6	1	1	1	1	1	1	1	1	1	1
01-01-06-01-02-02-07.mp4	AV	Speech	Fearful	Normal	Dogs	R2	A7	1	1	6	1	2	2	7	1	0	0	1	1	1	1	1	0	1
01-01-06-01-02-02-08.mp4	AV	Speech	Fearful	Normal	Dogs	R2	A8	1	1	6	1	2	2	8	0	1	1	1	1	1	1	1	1	1
01-01-06-01-02-02-09.mp4	AV	Speech	Fearful	Normal	Dogs	R2	A9	1	1	6	1	2	2	9	1	0	1	1	1	1	1	1	1	1
01-01-06-01-02-02-10.mp4	AV	Speech	Fearful	Normal	Dogs	R2	A10	1	1	6	1	2	2	10	1	1	1	1	1	1	1	1	1	1
01-01-06-01-02-02-11.mp4	AV	Speech	Fearful	Normal	Dogs	R2	A11	1	1	6	1	2	2	11	1	1	0	1	1	1	1	0	1	1
01-01-06-01-02-02-12.mp4	AV	Speech	Fearful	Normal	Dogs	R2	A12	1	1	6	1	2	2	12	1	0	1	0	1	0	0	1	0	0
01-01-06-01-02-02-13.mp4	AV	Speech	Fearful	Normal	Dogs	R2	A13	1	1	6	1	2	2	13	0	0	0	0	1	0	0	0	0	0
01-01-06-01-02-02-14.mp4	AV	Speech	Fearful	Normal	Dogs	R2	A14	1	1	6	1	2	2	14	1	1	1	1	1	1	1	1	1	1
01-01-06-01-02-02-15.mp4	AV	Speech	Fearful	Normal	Dogs	R2	A15	1	1	6	1	2	2	15	1	1	1	1	0	1	1	1	1	1
01-01-06-01-02-02-16.mp4	AV	Speech	Fearful	Normal	Dogs	R2	A16	1	1	6	1	2	2	16	1	1	1	1	1	1	1	1	1	1
01-01-06-01-02-02-17.mp4	AV	Speech	Fearful	Normal	Dogs	R2	A17	1	1	6	1	2	2	17	0	0	0	0	1	1	1	0	1	1
01-01-06-01-02-02-18.mp4	AV	Speech	Fearful	Normal	Dogs	R2	A18	1	1	6	1	2	2	18	0	1	0	1	1	1	1	1	1	1
01-01-06-01-02-02-19.mp4	AV	Speech	Fearful	Normal	Dogs	R2	A19	1	1	6	1	2	2	19	1	1	1	1	0	0	1	1	1	1
01-01-06-01-02-02-20.mp4	AV	Speech	Fearful	Normal	Dogs	R2	A20	1	1	6	1	2	2	20	1	1	1	1	1	1	1	1	1	1
01-01-06-01-02-02-21.mp4	AV	Speech	Fearful	Normal	Dogs	R2	A21	1	1	6	1	2	2	21	1	1	1	1	1	1	1	1	0	1
01-01-06-01-02-02-22.mp4	AV	Speech	Fearful	Normal	Dogs	R2	A22	1	1	6	1	2	2	22	0	0	0	1	1	0	0	1	1	0
01-01-06-01-02-02-23.mp4	AV	Speech	Fearful	Normal	Dogs	R2	A23	1	1	6	1	2	2	23	0	1	1	1	1	1	1	1	1	1
01-01-06-01-02-02-24.mp4	AV	Speech	Fearful	Normal	Dogs	R2	A24	1	1	6	1	2	2	24	1	1	1	0	1	1	1	1	1	1
01-01-06-02-01-01-01.mp4	AV	Speech	Fearful	Strong	Kids	R1	A1	1	1	6	2	1	1	1	1	1	1	1	1	1	1	1	1	1
01-01-06-02-01-01-02.mp4	AV	Speech	Fearful	Strong	Kids	R1	A2	1	1	6	2	1	1	2	1	1	1	0	1	1	1	1	1	1
01-01-06-02-01-01-03.mp4	AV	Speech	Fearful	Strong	Kids	R1	A3	1	1	6	2	1	1	3	1	1	1	1	1	1	1	1	1	0
01-01-06-02-01-01-04.mp4	AV	Speech	Fearful	Strong	Kids	R1	A4	1	1	6	2	1	1	4	1	1	1	0	0	0	1	0	1	1
01-01-06-02-01-01-05.mp4	AV	Speech	Fearful	Strong	Kids	R1	A5	1	1	6	2	1	1	5	1	1	1	1	1	1	1	1	1	0
01-01-06-02-01-01-06.mp4	AV	Speech	Fearful	Strong	Kids	R1	A6	1	1	6	2	1	1	6	0	0	0	0	1	1	1	0	0	1
01-01-06-02-01-01-07.mp4	AV	Speech	Fearful	Strong	Kids	R1	A7	1	1	6	2	1	1	7	1	1	1	1	1	1	1	1	1	1
01-01-06-02-01-01-08.mp4	AV	Speech	Fearful	Strong	Kids	R1	A8	1	1	6	2	1	1	8	1	1	1	1	1	1	1	1	1	1
01-01-06-02-01-01-09.mp4	AV	Speech	Fearful	Strong	Kids	R1	A9	1	1	6	2	1	1	9	1	1	1	1	1	1	1	1	1	1
01-01-06-02-01-01-10.mp4	AV	Speech	Fearful	Strong	Kids	R1	A10	1	1	6	2	1	1	10	1	1	1	1	1	1	1	1	1	1
01-01-06-02-01-01-11.mp4	AV	Speech	Fearful	Strong	Kids	R1	A11	1	1	6	2	1	1	11	1	1	1	1	1	1	1	1	1	1
01-01-06-02-01-01-12.mp4	AV	Speech	Fearful	Strong	Kids	R1	A12	1	1	6	2	1	1	12	1	1	1	1	1	0	0	0	1	1
01-01-06-02-01-01-13.mp4	AV	Speech	Fearful	Strong	Kids	R1	A13	1	1	6	2	1	1	13	0	0	0	1	0	1	0	0	0	0
01-01-06-02-01-01-14.mp4	AV	Speech	Fearful	Strong	Kids	R1	A14	1	1	6	2	1	1	14	1	1	1	1	0	1	1	1	1	1
01-01-06-02-01-01-15.mp4	AV	Speech	Fearful	Strong	Kids	R1	A15	1	1	6	2	1	1	15	1	1	1	1	1	1	1	1	1	1
01-01-06-02-01-01-16.mp4	AV	Speech	Fearful	Strong	Kids	R1	A16	1	1	6	2	1	1	16	1	1	1	1	0	1	1	0	1	1
01-01-06-02-01-01-17.mp4	AV	Speech	Fearful	Strong	Kids	R1	A17	1	1	6	2	1	1	17	1	0	1	1	0	0	0	0	0	1
01-01-06-02-01-01-18.mp4	AV	Speech	Fearful	Strong	Kids	R1	A18	1	1	6	2	1	1	18	1	1	1	0	0	1	1	1	1	1
01-01-06-02-01-01-19.mp4	AV	Speech	Fearful	Strong	Kids	R1	A19	1	1	6	2	1	1	19	0	0	0	0	1	0	0	1	0	0
01-01-06-02-01-01-20.mp4	AV	Speech	Fearful	Strong	Kids	R1	A20	1	1	6	2	1	1	20	1	0	1	1	1	1	1	1	1	1
01-01-06-02-01-01-21.mp4	AV	Speech	Fearful	Strong	Kids	R1	A21	1	1	6	2	1	1	21	1	1	1	0	1	1	1	1	1	1
01-01-06-02-01-01-22.mp4	AV	Speech	Fearful	Strong	Kids	R1	A22	1	1	6	2	1	1	22	1	1	1	1	1	1	1	1	0	1
01-01-06-02-01-01-23.mp4	AV	Speech	Fearful	Strong	Kids	R1	A23	1	1	6	2	1	1	23	1	1	1	1	1	1	1	1	1	1
01-01-06-02-01-01-24.mp4	AV	Speech	Fearful	Strong	Kids	R1	A24	1	1	6	2	1	1	24	1	1	1	1	0	1	0	1	0	1
01-01-06-02-01-02-01.mp4	AV	Speech	Fearful	Strong	Kids	R2	A1	1	1	6	2	1	2	1	1	1	1	1	0	1	0	1	1	1
01-01-06-02-01-02-02.mp4	AV	Speech	Fearful	Strong	Kids	R2	A2	1	1	6	2	1	2	2	1	0	1	1	1	0	1	1	1	1
01-01-06-02-01-02-03.mp4	AV	Speech	Fearful	Strong	Kids	R2	A3	1	1	6	2	1	2	3	1	1	1	1	0	1	1	1	1	1
01-01-06-02-01-02-04.mp4	AV	Speech	Fearful	Strong	Kids	R2	A4	1	1	6	2	1	2	4	1	1	1	0	0	1	1	1	1	0
01-01-06-02-01-02-05.mp4	AV	Speech	Fearful	Strong	Kids	R2	A5	1	1	6	2	1	2	5	1	1	1	1	1	1	1	1	1	1
01-01-06-02-01-02-06.mp4	AV	Speech	Fearful	Strong	Kids	R2	A6	1	1	6	2	1	2	6	1	1	1	1	1	0	1	0	1	0
01-01-06-02-01-02-07.mp4	AV	Speech	Fearful	Strong	Kids	R2	A7	1	1	6	2	1	2	7	1	1	1	1	1	1	0	1	1	1
01-01-06-02-01-02-08.mp4	AV	Speech	Fearful	Strong	Kids	R2	A8	1	1	6	2	1	2	8	1	1	1	1	1	1	1	1	1	1
01-01-06-02-01-02-09.mp4	AV	Speech	Fearful	Strong	Kids	R2	A9	1	1	6	2	1	2	9	1	1	1	1	1	1	1	1	1	0
01-01-06-02-01-02-10.mp4	AV	Speech	Fearful	Strong	Kids	R2	A10	1	1	6	2	1	2	10	1	1	0	1	1	1	1	1	1	1
01-01-06-02-01-02-11.mp4	AV	Speech	Fearful	Strong	Kids	R2	A11	1	1	6	2	1	2	11	1	1	1	1	1	1	1	1	1	1
01-01-06-02-01-02-12.mp4	AV	Speech	Fearful	Strong	Kids	R2	A12	1	1	6	2	1	2	12	1	0	1	0	1	1	0	1	0	0
01-01-06-02-01-02-13.mp4	AV	Speech	Fearful	Strong	Kids	R2	A13	1	1	6	2	1	2	13	0	1	0	0	0	0	0	1	0	0
01-01-06-02-01-02-14.mp4	AV	Speech	Fearful	Strong	Kids	R2	A14	1	1	6	2	1	2	14	1	1	0	1	1	1	1	1	1	1
01-01-06-02-01-02-15.mp4	AV	Speech	Fearful	Strong	Kids	R2	A15	1	1	6	2	1	2	15	1	1	1	0	1	1	1	1	1	1
01-01-06-02-01-02-16.mp4	AV	Speech	Fearful	Strong	Kids	R2	A16	1	1	6	2	1	2	16	1	1	1	1	1	1	1	1	1	1
01-01-06-02-01-02-17.mp4	AV	Speech	Fearful	Strong	Kids	R2	A17	1	1	6	2	1	2	17	0	1	1	1	0	1	1	0	1	0
01-01-06-02-01-02-18.mp4	AV	Speech	Fearful	Strong	Kids	R2	A18	1	1	6	2	1	2	18	1	1	1	1	1	1	1	1	1	1
01-01-06-02-01-02-19.mp4	AV	Speech	Fearful	Strong	Kids	R2	A19	1	1	6	2	1	2	19	0	1	0	0	1	1	1	0	1	0
01-01-06-02-01-02-20.mp4	AV	Speech	Fearful	Strong	Kids	R2	A20	1	1	6	2	1	2	20	1	1	1	1	1	1	1	1	1	1
01-01-06-02-01-02-21.mp4	AV	Speech	Fearful	Strong	Kids	R2	A21	1	1	6	2	1	2	21	1	1	1	0	1	1	1	1	1	1
01-01-06-02-01-02-22.mp4	AV	Speech	Fearful	Strong	Kids	R2	A22	1	1	6	2	1	2	22	1	0	1	1	0	0	0	1	1	1
01-01-06-02-01-02-23.mp4	AV	Speech	Fearful	Strong	Kids	R2	A23	1	1	6	2	1	2	23	1	1	0	0	0	1	0	1	1	0
01-01-06-02-01-02-24.mp4	AV	Speech	Fearful	Strong	Kids	R2	A24	1	1	6	2	1	2	24	1	1	1	0	0	1	1	0	1	1
01-01-06-02-02-01-01.mp4	AV	Speech	Fearful	Strong	Dogs	R1	A1	1	1	6	2	2	1	1	1	1	1	1	1	1	1	1	0	1
01-01-06-02-02-01-02.mp4	AV	Speech	Fearful	Strong	Dogs	R1	A2	1	1	6	2	2	1	2	1	1	1	1	1	1	0	1	0	0
01-01-06-02-02-01-03.mp4	AV	Speech	Fearful	Strong	Dogs	R1	A3	1	1	6	2	2	1	3	1	1	0	1	1	1	0	1	1	1
01-01-06-02-02-01-04.mp4	AV	Speech	Fearful	Strong	Dogs	R1	A4	1	1	6	2	2	1	4	1	1	1	1	1	1	0	1	1	0
01-01-06-02-02-01-05.mp4	AV	Speech	Fearful	Strong	Dogs	R1	A5	1	1	6	2	2	1	5	1	1	1	1	0	1	1	1	1	1
01-01-06-02-02-01-06.mp4	AV	Speech	Fearful	Strong	Dogs	R1	A6	1	1	6	2	2	1	6	1	1	1	1	1	0	1	1	1	1
01-01-06-02-02-01-07.mp4	AV	Speech	Fearful	Strong	Dogs	R1	A7	1	1	6	2	2	1	7	1	1	0	1	0	1	1	1	1	0
01-01-06-02-02-01-08.mp4	AV	Speech	Fearful	Strong	Dogs	R1	A8	1	1	6	2	2	1	8	0	1	1	1	1	1	1	1	1	1
01-01-06-02-02-01-09.mp4	AV	Speech	Fearful	Strong	Dogs	R1	A9	1	1	6	2	2	1	9	1	1	1	1	1	1	1	1	1	1
01-01-06-02-02-01-10.mp4	AV	Speech	Fearful	Strong	Dogs	R1	A10	1	1	6	2	2	1	10	1	1	0	1	0	1	0	1	1	1
01-01-06-02-02-01-11.mp4	AV	Speech	Fearful	Strong	Dogs	R1	A11	1	1	6	2	2	1	11	1	1	1	0	1	1	1	1	1	1
01-01-06-02-02-01-12.mp4	AV	Speech	Fearful	Strong	Dogs	R1	A12	1	1	6	2	2	1	12	0	1	1	0	1	1	0	0	1	1
01-01-06-02-02-01-13.mp4	AV	Speech	Fearful	Strong	Dogs	R1	A13	1	1	6	2	2	1	13	0	0	0	0	1	0	0	0	0	0
01-01-06-02-02-01-14.mp4	AV	Speech	Fearful	Strong	Dogs	R1	A14	1	1	6	2	2	1	14	1	1	1	1	1	1	1	1	1	1
01-01-06-02-02-01-15.mp4	AV	Speech	Fearful	Strong	Dogs	R1	A15	1	1	6	2	2	1	15	1	1	1	1	1	1	1	0	1	0
01-01-06-02-02-01-16.mp4	AV	Speech	Fearful	Strong	Dogs	R1	A16	1	1	6	2	2	1	16	1	1	1	1	1	1	1	1	1	0
01-01-06-02-02-01-17.mp4	AV	Speech	Fearful	Strong	Dogs	R1	A17	1	1	6	2	2	1	17	0	1	1	1	0	0	1	1	1	1
01-01-06-02-02-01-18.mp4	AV	Speech	Fearful	Strong	Dogs	R1	A18	1	1	6	2	2	1	18	1	1	1	1	1	1	1	1	1	1
01-01-06-02-02-01-19.mp4	AV	Speech	Fearful	Strong	Dogs	R1	A19	1	1	6	2	2	1	19	1	0	1	1	1	1	1	1	1	1
01-01-06-02-02-01-20.mp4	AV	Speech	Fearful	Strong	Dogs	R1	A20	1	1	6	2	2	1	20	0	1	1	1	1	1	1	1	1	1
01-01-06-02-02-01-21.mp4	AV	Speech	Fearful	Strong	Dogs	R1	A21	1	1	6	2	2	1	21	1	1	1	1	1	1	1	1	0	1
01-01-06-02-02-01-22.mp4	AV	Speech	Fearful	Strong	Dogs	R1	A22	1	1	6	2	2	1	22	1	1	1	1	1	1	1	0	1	1
01-01-06-02-02-01-23.mp4	AV	Speech	Fearful	Strong	Dogs	R1	A23	1	1	6	2	2	1	23	1	1	0	1	1	1	0	1	0	1
01-01-06-02-02-01-24.mp4	AV	Speech	Fearful	Strong	Dogs	R1	A24	1	1	6	2	2	1	24	1	0	1	1	1	1	1	1	0	1
01-01-06-02-02-02-01.mp4	AV	Speech	Fearful	Strong	Dogs	R2	A1	1	1	6	2	2	2	1	0	1	1	1	1	1	1	1	1	1
01-01-06-02-02-02-02.mp4	AV	Speech	Fearful	Strong	Dogs	R2	A2	1	1	6	2	2	2	2	1	1	1	1	1	1	1	1	1	1
01-01-06-02-02-02-03.mp4	AV	Speech	Fearful	Strong	Dogs	R2	A3	1	1	6	2	2	2	3	1	1	1	1	1	1	1	1	1	1
01-01-06-02-02-02-04.mp4	AV	Speech	Fearful	Strong	Dogs	R2	A4	1	1	6	2	2	2	4	1	0	0	0	1	1	1	1	1	0
01-01-06-02-02-02-05.mp4	AV	Speech	Fearful	Strong	Dogs	R2	A5	1	1	6	2	2	2	5	1	1	1	1	0	1	1	1	1	1
01-01-06-02-02-02-06.mp4	AV	Speech	Fearful	Strong	Dogs	R2	A6	1	1	6	2	2	2	6	0	0	0	1	1	1	1	1	0	1
01-01-06-02-02-02-07.mp4	AV	Speech	Fearful	Strong	Dogs	R2	A7	1	1	6	2	2	2	7	1	1	1	1	1	0	1	0	1	1
01-01-06-02-02-02-08.mp4	AV	Speech	Fearful	Strong	Dogs	R2	A8	1	1	6	2	2	2	8	1	0	1	1	1	1	1	1	1	1
01-01-06-02-02-02-09.mp4	AV	Speech	Fearful	Strong	Dogs	R2	A9	1	1	6	2	2	2	9	1	1	1	1	1	1	1	1	1	1
01-01-06-02-02-02-10.mp4	AV	Speech	Fearful	Strong	Dogs	R2	A10	1	1	6	2	2	2	10	0	0	1	0	0	0	0	1	0	0
01-01-06-02-02-02-11.mp4	AV	Speech	Fearful	Strong	Dogs	R2	A11	1	1	6	2	2	2	11	1	1	1	0	1	0	1	1	1	1
01-01-06-02-02-02-12.mp4	AV	Speech	Fearful	Strong	Dogs	R2	A12	1	1	6	2	2	2	12	0	0	0	1	0	1	1	1	1	1
01-01-06-02-02-02-13.mp4	AV	Speech	Fearful	Strong	Dogs	R2	A13	1	1	6	2	2	2	13	0	0	1	0	1	1	0	1	1	0
01-01-06-02-02-02-14.mp4	AV	Speech	Fearful	Strong	Dogs	R2	A14	1	1	6	2	2	2	14	0	1	1	1	1	1	1	1	1	1
01-01-06-02-02-02-15.mp4	AV	Speech	Fearful	Strong	Dogs	R2	A15	1	1	6	2	2	2	15	1	1	1	1	1	1	1	1	1	1
01-01-06-02-02-02-16.mp4	AV	Speech	Fearful	Strong	Dogs	R2	A16	1	1	6	2	2	2	16	1	1	1	1	1	1	1	0	1	0
01-01-06-02-02-02-17.mp4	AV	Speech	Fearful	Strong	Dogs	R2	A17	1	1	6	2	2	2	17	0	1	1	0	0	1	1	1	0	0
01-01-06-02-02-02-18.mp4	AV	Speech	Fearful	Strong	Dogs	R2	A18	1	1	6	2	2	2	18	1	1	0	1	1	0	1	1	1	1
01-01-06-02-02-02-19.mp4	AV	Speech	Fearful	Strong	Dogs	R2	A19	1	1	6	2	2	2	19	1	0	1	1	1	1	1	1	1	1
01-01-06-02-02-02-20.mp4	AV	Speech	Fearful	Strong	Dogs	R2	A20	1	1	6	2	2	2	20	1	1	0	1	1	1	1	1	1	1
01-01-06-02-02-02-21.mp4	AV	Speech	Fearful	Strong	Dogs	R2	A21	1	1	6	2	2	2	21	1	1	1	1	0	0	1	1	0	1
01-01-06-02-02-02-22.mp4	AV	Speech	Fearful	Strong	Dogs	R2	A22	1	1	6	2	2	2	22	0	1	0	1	1	0	0	1	1	0
01-01-06-02-02-02-23.mp4	AV	Speech	Fearful	Strong	Dogs	R2	A23	1	1	6	2	2	2	23	1	1	1	1	1	1	1	1	1	1
01-01-06-02-02-02-24.mp4	AV	Speech	Fearful	Strong	Dogs	R2	A24	1	1	6	2	2	2	24	1	0	1	1	1	1	1	1	1	1
01-01-07-01-01-01-01.mp4	AV	Speech	Disgust	Normal	Kids	R1	A1	1	1	7	1	1	1	1	1	1	0	1	1	0	1	1	1	1
01-01-07-01-01-01-02.mp4	AV	Speech	Disgust	Normal	Kids	R1	A2	1	1	7	1	1	1	2	1	1	1	0	1	0	1	1	1	1
01-01-07-01-01-01-03.mp4	AV	Speech	Disgust	Normal	Kids	R1	A3	1	1	7	1	1	1	3	1	1	1	1	1	1	1	1	1	1
01-01-07-01-01-01-04.mp4	AV	Speech	Disgust	Normal	Kids	R1	A4	1	1	7	1	1	1	4	1	1	1	1	1	1	1	1	1	1
01-01-07-01-01-01-05.mp4	AV	Speech	Disgust	Normal	Kids	R1	A5	1	1	7	1	1	1	5	1	1	1	1	1	1	1	1	1	1
01-01-07-01-01-01-06.mp4	AV	Speech	Disgust	Normal	Kids	R1	A6	1	1	7	1	1	1	6	1	1	1	1	1	1	1	1	1	1
01-01-07-01-01-01-07.mp4	AV	Speech	Disgust	Normal	Kids	R1	A7	1	1	7	1	1	1	7	1	1	1	1	0	1	1	1	1	1
01-01-07-01-01-01-08.mp4	AV	Speech	Disgust	Normal	Kids	R1	A8	1	1	7	1	1	1	8	1	1	1	1	1	1	1	1	1	1
01-01-07-01-01-01-09.mp4	AV	Speech	Disgust	Normal	Kids	R1	A9	1	1	7	1	1	1	9	1	1	1	1	1	1	1	1	1	1
01-01-07-01-01-01-10.mp4	AV	Speech	Disgust	Normal	Kids	R1	A10	1	1	7	1	1	1	10	1	1	1	1	0	1	1	1	1	1
01-01-07-01-01-01-11.mp4	AV	Speech	Disgust	Normal	Kids	R1	A11	1	1	7	1	1	1	11	1	1	1	1	1	0	1	1	1	1
01-01-07-01-01-01-12.mp4	AV	Speech	Disgust	Normal	Kids	R1	A12	1	1	7	1	1	1	12	1	1	0	0	1	1	1	1	1	1
01-01-07-01-01-01-13.mp4	AV	Speech	Disgust	Normal	Kids	R1	A13	1	1	7	1	1	1	13	1	1	0	1	1	1	0	1	1	1
01-01-07-01-01-01-14.mp4	AV	Speech	Disgust	Normal	Kids	R1	A14	1	1	7	1	1	1	14	1	1	1	1	1	1	1	1	1	1
01-01-07-01-01-01-15.mp4	AV	Speech	Disgust	Normal	Kids	R1	A15	1	1	7	1	1	1	15	0	0	1	1	0	0	1	1	1	1
01-01-07-01-01-01-16.mp4	AV	Speech	Disgust	Normal	Kids	R1	A16	1	1	7	1	1	1	16	1	1	1	1	1	1	1	1	1	1
01-01-07-01-01-01-17.mp4	AV	Speech	Disgust	Normal	Kids	R1	A17	1	1	7	1	1	1	17	1	1	1	1	1	1	1	1	1	1
01-01-07-01-01-01-18.mp4	AV	Speech	Disgust	Normal	Kids	R1	A18	1	1	7	1	1	1	18	1	1	1	1	1	1	1	1	1	1
01-01-07-01-01-01-19.mp4	AV	Speech	Disgust	Normal	Kids	R1	A19	1	1	7	1	1	1	19	1	1	1	1	1	1	1	1	1	1
01-01-07-01-01-01-20.mp4	AV	Speech	Disgust	Normal	Kids	R1	A20	1	1	7	1	1	1	20	1	1	1	1	1	1	0	1	0	0
01-01-07-01-01-01-21.mp4	AV	Speech	Disgust	Normal	Kids	R1	A21	1	1	7	1	1	1	21	1	1	1	1	1	1	1	0	1	1
01-01-07-01-01-01-22.mp4	AV	Speech	Disgust	Normal	Kids	R1	A22	1	1	7	1	1	1	22	1	1	1	1	0	1	1	1	1	0
01-01-07-01-01-01-23.mp4	AV	Speech	Disgust	Normal	Kids	R1	A23	1	1	7	1	1	1	23	1	0	1	1	1	1	0	1	1	1
01-01-07-01-01-01-24.mp4	AV	Speech	Disgust	Normal	Kids	R1	A24	1	1	7	1	1	1	24	1	1	0	0	0	1	1	1	1	1
01-01-07-01-01-02-01.mp4	AV	Speech	Disgust	Normal	Kids	R2	A1	1	1	7	1	1	2	1	1	1	1	1	1	1	1	0	1	1
01-01-07-01-01-02-02.mp4	AV	Speech	Disgust	Normal	Kids	R2	A2	1	1	7	1	1	2	2	1	1	1	1	1	1	1	1	1	1
01-01-07-01-01-02-03.mp4	AV	Speech	Disgust	Normal	Kids	R2	A3	1	1	7	1	1	2	3	1	1	1	1	1	1	1	0	1	1
01-01-07-01-01-02-04.mp4	AV	Speech	Disgust	Normal	Kids	R2	A4	1	1	7	1	1	2	4	1	1	1	1	1	1	1	1	1	1
01-01-07-01-01-02-05.mp4	AV	Speech	Disgust	Normal	Kids	R2	A5	1	1	7	1	1	2	5	1	1	1	1	1	1	0	1	1	1
01-01-07-01-01-02-06.mp4	AV	Speech	Disgust	Normal	Kids	R2	A6	1	1	7	1	1	2	6	1	1	1	1	1	1	1	1	1	1
01-01-07-01-01-02-07.mp4	AV	Speech	Disgust	Normal	Kids	R2	A7	1	1	7	1	1	2	7	1	1	1	1	1	1	1	1	1	1
01-01-07-01-01-02-08.mp4	AV	Speech	Disgust	Normal	Kids	R2	A8	1	1	7	1	1	2	8	1	1	1	1	1	0	1	1	1	1
01-01-07-01-01-02-09.mp4	AV	Speech	Disgust	Normal	Kids	R2	A9	1	1	7	1	1	2	9	1	1	1	1	1	1	1	1	0	0
01-01-07-01-01-02-10.mp4	AV	Speech	Disgust	Normal	Kids	R2	A10	1	1	7	1	1	2	10	1	0	1	1	1	1	1	1	1	1
01-01-07-01-01-02-11.mp4	AV	Speech	Disgust	Normal	Kids	R2	A11	1	1	7	1	1	2	11	1	1	1	1	1	1	1	1	1	1
01-01-07-01-01-02-12.mp4	AV	Speech	Disgust	Normal	Kids	R2	A12	1	1	7	1	1	2	12	1	1	1	1	1	1	1	1	0	1
01-01-07-01-01-02-13.mp4	AV	Speech	Disgust	Normal	Kids	R2	A13	1	1	7	1	1	2	13	1	1	1	1	1	1	1	1	0	0
01-01-07-01-01-02-14.mp4	AV	Speech	Disgust	Normal	Kids	R2	A14	1	1	7	1	1	2	14	1	1	1	1	1	1	1	1	1	0
01-01-07-01-01-02-15.mp4	AV	Speech	Disgust	Normal	Kids	R2	A15	1	1	7	1	1	2	15	1	0	0	1	1	1	0	1	0	0
01-01-07-01-01-02-16.mp4	AV	Speech	Disgust	Normal	Kids	R2	A16	1	1	7	1	1	2	16	1	1	1	0	1	1	1	1	1	1
01-01-07-01-01-02-17.mp4	AV	Speech	Disgust	Normal	Kids	R2	A17	1	1	7	1	1	2	17	1	0	0	1	1	1	0	1	1	1
01-01-07-01-01-02-18.mp4	AV	Speech	Disgust	Normal	Kids	R2	A18	1	1	7	1	1	2	18	1	1	1	1	0	1	1	1	1	1
01-01-07-01-01-02-19.mp4	AV	Speech	Disgust	Normal	Kids	R2	A19	1	1	7	1	1	2	19	1	1	1	1	1	1	1	1	1	1
01-01-07-01-01-02-20.mp4	AV	Speech	Disgust	Normal	Kids	R2	A20	1	1	7	1	1	2	20	1	1	1	1	1	1	1	1	1	1
01-01-07-01-01-02-21.mp4	AV	Speech	Disgust	Normal	Kids	R2	A21	1	1	7	1	1	2	21	1	1	1	1	1	1	0	1	1	1
01-01-07-01-01-02-22.mp4	AV	Speech	Disgust	Normal	Kids	R2	A22	1	1	7	1	1	2	22	0	1	1	0	1	0	1	1	1	0
01-01-07-01-01-02-23.mp4	AV	Speech	Disgust	Normal	Kids	R2	A23	1	1	7	1	1	2	23	1	1	1	1	1	1	1	1	1	1
01-01-07-01-01-02-24.mp4	AV	Speech	Disgust	Normal	Kids	R2	A24	1	1	7	1	1	2	24	1	1	1	1	1	0	1	1	1	1
01-01-07-01-02-01-01.mp4	AV	Speech	Disgust	Normal	Dogs	R1	A1	1	1	7	1	2	1	1	1	1	1	1	1	1	1	1	1	1
01-01-07-01-02-01-02.mp4	AV	Speech	Disgust	Normal	Dogs	R1	A2	1	1	7	1	2	1	2	1	1	1	1	1	1	1	1	1	1
01-01-07-01-02-01-03.mp4	AV	Speech	Disgust	Normal	Dogs	R1	A3	1	1	7	1	2	1	3	1	1	1	1	1	1	1	1	1	1
01-01-07-01-02-01-04.mp4	AV	Speech	Disgust	Normal	Dogs	R1	A4	1	1	7	1	2	1	4	1	1	1	1	1	1	1	1	1	1
01-01-07-01-02-01-05.mp4	AV	Speech	Disgust	Normal	Dogs	R1	A5	1	1	7	1	2	1	5	1	1	1	1	1	1	1	0	1	1
01-01-07-01-02-01-06.mp4	AV	Speech	Disgust	Normal	Dogs	R1	A6	1	1	7	1	2	1	6	1	1	1	1	1	1	1	1	1	1
01-01-07-01-02-01-07.mp4	AV	Speech	Disgust	Normal	Dogs	R1	A7	1	1	7	1	2	1	7	1	1	1	1	1	1	1	1	0	1
01-01-07-01-02-01-08.mp4	AV	Speech	Disgust	Normal	Dogs	R1	A8	1	1	7	1	2	1	8	1	1	1	1	1	1	1	1	1	1
01-01-07-01-02-01-09.mp4	AV	Speech	Disgust	Normal	Dogs	R1	A9	1	1	7	1	2	1	9	0	1	1	1	1	1	1	1	1	0
01-01-07-01-02-01-10.mp4	AV	Speech	Disgust	Normal	Dogs	R1	A10	1	1	7	1	2	1	10	1	1	1	1	0	0	0	1	1	1
01-01-07-01-02-01-11.mp4	AV	Speech	Disgust	Normal	Dogs	R1	A11	1	1	7	1	2	1	11	1	1	1	1	1	1	1	1	1	1
01-01-07-01-02-01-12.mp4	AV	Speech	Disgust	Normal	Dogs	R1	A12	1	1	7	1	2	1	12	1	1	0	1	1	1	1	1	1	0
01-01-07-01-02-01-13.mp4	AV	Speech	Disgust	Normal	Dogs	R1	A13	1	1	7	1	2	1	13	1	1	0	1	1	1	1	1	1	1
01-01-07-01-02-01-14.mp4	AV	Speech	Disgust	Normal	Dogs	R1	A14	1	1	7	1	2	1	14	1	1	1	1	1	0	1	1	1	1
01-01-07-01-02-01-15.mp4	AV	Speech	Disgust	Normal	Dogs	R1	A15	1	1	7	1	2	1	15	1	1	1	1	1	1	1	1	1	1
01-01-07-01-02-01-16.mp4	AV	Speech	Disgust	Normal	Dogs	R1	A16	1	1	7	1	2	1	16	1	1	1	1	1	1	0	1	1	1
01-01-07-01-02-01-17.mp4	AV	Speech	Disgust	Normal	Dogs	R1	A17	1	1	7	1	2	1	17	0	1	1	1	1	1	0	0	1	1
01-01-07-01-02-01-18.mp4	AV	Speech	Disgust	Normal	Dogs	R1	A18	1	1	7	1	2	1	18	1	1	1	1	1	1	1	1	1	1
01-01-07-01-02-01-19.mp4	AV	Speech	Disgust	Normal	Dogs	R1	A19	1	1	7	1	2	1	19	1	1	1	1	1	1	1	1	1	1
01-01-07-01-02-01-20.mp4	AV	Speech	Disgust	Normal	Dogs	R1	A20	1	1	7	1	2	1	20	0	1	1	1	1	0	1	1	1	1
01-01-07-01-02-01-21.mp4	AV	Speech	Disgust	Normal	Dogs	R1	A21	1	1	7	1	2	1	21	1	0	1	0	1	1	0	0	0	1
01-01-07-01-02-01-22.mp4	AV	Speech	Disgust	Normal	Dogs	R1	A22	1	1	7	1	2	1	22	1	1	1	1	1	1	1	1	1	1
01-01-07-01-02-01-23.mp4	AV	Speech	Disgust	Normal	Dogs	R1	A23	1	1	7	1	2	1	23	1	1	1	1	1	1	1	1	1	0
01-01-07-01-02-01-24.mp4	AV	Speech	Disgust	Normal	Dogs	R1	A24	1	1	7	1	2	1	24	0	1	1	1	1	1	1	1	1	1
01-01-07-01-02-02-01.mp4	AV	Speech	Disgust	Normal	Dogs	R2	A1	1	1	7	1	2	2	1	1	1	1	1	1	1	1	1	1	1
01-01-07-01-02-02-02.mp4	AV	Speech	Disgust	Normal	Dogs	R2	A2	1	1	7	1	2	2	2	1	1	1	1	1	1	1	1	1	1
01-01-07-01-02-02-03.mp4	AV	Speech	Disgust	Normal	Dogs	R2	A3	1	1	7	1	2	2	3	1	1	1	1	1	1	1	1	1	1
01-01-07-01-02-02-04.mp4	AV	Speech	Disgust	Normal	Dogs	R2	A4	1	1	7	1	2	2	4	1	1	1	1	1	1	1	1	1	1
01-01-07-01-02-02-05.mp4	AV	Speech	Disgust	Normal	Dogs	R2	A5	1	1	7	1	2	2	5	1	1	0	1	0	0	1	1	1	1
01-01-07-01-02-02-06.mp4	AV	Speech	Disgust	Normal	Dogs	R2	A6	1	1	7	1	2	2	6	1	1	1	1	1	1	1	1	1	1
01-01-07-01-02-02-07.mp4	AV	Speech	Disgust	Normal	Dogs	R2	A7	1	1	7	1	2	2	7	1	1	1	1	1	1	1	1	1	1
01-01-07-01-02-02-08.mp4	AV	Speech	Disgust	Normal	Dogs	R2	A8	1	1	7	1	2	2	8	0	1	1	1	1	1	1	1	1	1
01-01-07-01-02-02-09.mp4	AV	Speech	Disgust	Normal	Dogs	R2	A9	1	1	7	1	2	2	9	1	1	1	1	1	1	1	1	1	1
01-01-07-01-02-02-10.mp4	AV	Speech	Disgust	Normal	Dogs	R2	A10	1	1	7	1	2	2	10	0	1	1	1	1	1	1	1	1	1
01-01-07-01-02-02-11.mp4	AV	Speech	Disgust	Normal	Dogs	R2	A11	1	1	7	1	2	2	11	1	1	1	1	1	1	1	1	1	1
01-01-07-01-02-02-12.mp4	AV	Speech	Disgust	Normal	Dogs	R2	A12	1	1	7	1	2	2	12	1	1	1	0	1	1	1	1	1	1
01-01-07-01-02-02-13.mp4	AV	Speech	Disgust	Normal	Dogs	R2	A13	1	1	7	1	2	2	13	1	1	1	1	0	0	0	1	1	0
01-01-07-01-02-02-14.mp4	AV	Speech	Disgust	Normal	Dogs	R2	A14	1	1	7	1	2	2	14	0	1	1	0	1	0	1	0	1	1
01-01-07-01-02-02-15.mp4	AV	Speech	Disgust	Normal	Dogs	R2	A15	1	1	7	1	2	2	15	1	1	0	1	1	1	1	0	1	1
01-01-07-01-02-02-16.mp4	AV	Speech	Disgust	Normal	Dogs	R2	A16	1	1	7	1	2	2	16	1	1	1	1	1	1	1	1	1	1
01-01-07-01-02-02-17.mp4	AV	Speech	Disgust	Normal	Dogs	R2	A17	1	1	7	1	2	2	17	1	1	0	1	1	1	1	1	1	1
01-01-07-01-02-02-18.mp4	AV	Speech	Disgust	Normal	Dogs	R2	A18	1	1	7	1	2	2	18	1	1	0	1	1	1	1	1	1	1
01-01-07-01-02-02-19.mp4	AV	Speech	Disgust	Normal	Dogs	R2	A19	1	1	7	1	2	2	19	1	1	1	1	1	1	0	1	1	1
01-01-07-01-02-02-20.mp4	AV	Speech	Disgust	Normal	Dogs	R2	A20	1	1	7	1	2	2	20	1	1	1	1	1	1	1	1	1	1
01-01-07-01-02-02-21.mp4	AV	Speech	Disgust	Normal	Dogs	R2	A21	1	1	7	1	2	2	21	1	1	1	0	1	1	0	1	0	1
01-01-07-01-02-02-22.mp4	AV	Speech	Disgust	Normal	Dogs	R2	A22	1	1	7	1	2	2	22	1	1	1	1	1	1	1	0	1	1
01-01-07-01-02-02-23.mp4	AV	Speech	Disgust	Normal	Dogs	R2	A23	1	1	7	1	2	2	23	1	1	1	1	1	1	1	1	1	0
01-01-07-01-02-02-24.mp4	AV	Speech	Disgust	Normal	Dogs	R2	A24	1	1	7	1	2	2	24	1	1	1	1	1	0	1	1	1	1
01-01-07-02-01-01-01.mp4	AV	Speech	Disgust	Strong	Kids	R1	A1	1	1	7	2	1	1	1	1	1	0	0	1	1	1	0	1	1
01-01-07-02-01-01-02.mp4	AV	Speech	Disgust	Strong	Kids	R1	A2	1	1	7	2	1	1	2	1	1	1	1	1	1	1	1	1	1
01-01-07-02-01-01-03.mp4	AV	Speech	Disgust	Strong	Kids	R1	A3	1	1	7	2	1	1	3	1	1	1	1	1	1	1	1	1	1
01-01-07-02-01-01-04.mp4	AV	Speech	Disgust	Strong	Kids	R1	A4	1	1	7	2	1	1	4	1	1	1	1	1	1	1	1	0	1
01-01-07-02-01-01-05.mp4	AV	Speech	Disgust	Strong	Kids	R1	A5	1	1	7	2	1	1	5	1	1	0	1	1	1	0	1	1	1
01-01-07-02-01-01-06.mp4	AV	Speech	Disgust	Strong	Kids	R1	A6	1	1	7	2	1	1	6	0	1	1	1	1	1	1	1	0	1
01-01-07-02-01-01-07.mp4	AV	Speech	Disgust	Strong	Kids	R1	A7	1	1	7	2	1	1	7	1	1	1	1	1	1	1	1	1	0
01-01-07-02-01-01-08.mp4	AV	Speech	Disgust	Strong	Kids	R1	A8	1	1	7	2	1	1	8	1	1	1	1	1	1	1	1	1	1
01-01-07-02-01-01-09.mp4	AV	Speech	Disgust	Strong	Kids	R1	A9	1	1	7	2	1	1	9	1	0	1	0	0	0	0	1	0	0
01-01-07-02-01-01-10.mp4	AV	Speech	Disgust	Strong	Kids	R1	A10	1	1	7	2	1	1	10	1	1	1	1	1	1	1	1	1	1
01-01-07-02-01-01-11.mp4	AV	Speech	Disgust	Strong	Kids	R1	A11	1	1	7	2	1	1	11	1	1	1	1	1	1	1	1	1	1
01-01-07-02-01-01-12.mp4	AV	Speech	Disgust	Strong	Kids	R1	A12	1	1	7	2	1	1	12	1	1	1	1	1	1	1	1	1	1
01-01-07-02-01-01-13.mp4	AV	Speech	Disgust	Strong	Kids	R1	A13	1	1	7	2	1	1	13	1	1	1	1	1	1	1	1	1	0
01-01-07-02-01-01-14.mp4	AV	Speech	Disgust	Strong	Kids	R1	A14	1	1	7	2	1	1	14	0	1	1	0	0	1	1	1	0	0
01-01-07-02-01-01-15.mp4	AV	Speech	Disgust	Strong	Kids	R1	A15	1	1	7	2	1	1	15	1	0	1	0	1	0	1	0	0	0
01-01-07-02-01-01-16.mp4	AV	Speech	Disgust	Strong	Kids	R1	A16	1	1	7	2	1	1	16	1	1	1	1	1	1	1	1	1	1
01-01-07-02-01-01-17.mp4	AV	Speech	Disgust	Strong	Kids	R1	A17	1	1	7	2	1	1	17	1	1	1	1	1	1	1	1	1	1
01-01-07-02-01-01-18.mp4	AV	Speech	Disgust	Strong	Kids	R1	A18	1	1	7	2	1	1	18	1	1	1	1	0	1	1	1	1	1
01-01-07-02-01-01-19.mp4	AV	Speech	Disgust	Strong	Kids	R1	A19	1	1	7	2	1	1	19	0	1	1	1	1	1	1	1	1	1
01-01-07-02-01-01-20.mp4	AV	Speech	Disgust	Strong	Kids	R1	A20	1	1	7	2	1	1	20	0	1	1	1	1	1	1	1	1	1
01-01-07-02-01-01-21.mp4	AV	Speech	Disgust	Strong	Kids	R1	A21	1	1	7	2	1	1	21	1	1	1	1	1	0	1	1	0	0
01-01-07-02-01-01-22.mp4	AV	Speech	Disgust	Strong	Kids	R1	A22	1	1	7	2	1	1	22	1	1	1	1	1	1	0	1	1	1
01-01-07-02-01-01-23.mp4	AV	Speech	Disgust	Strong	Kids	R1	A23	1	1	7	2	1	1	23	1	1	0	1	1	1	1	1	1	1
01-01-07-02-01-01-24.mp4	AV	Speech	Disgust	Strong	Kids	R1	A24	1	1	7	2	1	1	24	1	1	1	0	1	0	1	0	1	0
01-01-07-02-01-02-01.mp4	AV	Speech	Disgust	Strong	Kids	R2	A1	1	1	7	2	1	2	1	1	1	0	0	1	1	0	1	1	1
01-01-07-02-01-02-02.mp4	AV	Speech	Disgust	Strong	Kids	R2	A2	1	1	7	2	1	2	2	1	1	1	1	1	0	1	1	1	1
01-01-07-02-01-02-03.mp4	AV	Speech	Disgust	Strong	Kids	R2	A3	1	1	7	2	1	2	3	1	1	1	1	1	1	1	1	1	1
01-01-07-02-01-02-04.mp4	AV	Speech	Disgust	Strong	Kids	R2	A4	1	1	7	2	1	2	4	1	0	1	1	1	1	1	1	1	1
01-01-07-02-01-02-05.mp4	AV	Speech	Disgust	Strong	Kids	R2	A5	1	1	7	2	1	2	5	1	1	1	1	1	1	1	1	1	1
01-01-07-02-01-02-06.mp4	AV	Speech	Disgust	Strong	Kids	R2	A6	1	1	7	2	1	2	6	1	0	1	1	1	1	1	1	1	1
01-01-07-02-01-02-07.mp4	AV	Speech	Disgust	Strong	Kids	R2	A7	1	1	7	2	1	2	7	1	1	1	1	1	0	1	1	1	1
01-01-07-02-01-02-08.mp4	AV	Speech	Disgust	Strong	Kids	R2	A8	1	1	7	2	1	2	8	1	1	1	1	1	1	1	1	1	1
01-01-07-02-01-02-09.mp4	AV	Speech	Disgust	Strong	Kids	R2	A9	1	1	7	2	1	2	9	1	1	1	1	1	1	0	1	1	0
01-01-07-02-01-02-10.mp4	AV	Speech	Disgust	Strong	Kids	R2	A10	1	1	7	2	1	2	10	1	1	1	1	0	1	1	1	1	1
01-01-07-02-01-02-11.mp4	AV	Speech	Disgust	Strong	Kids	R2	A11	1	1	7	2	1	2	11	1	1	1	1	1	1	1	1	1	1
01-01-07-02-01-02-12.mp4	AV	Speech	Disgust	Strong	Kids	R2	A12	1	1	7	2	1	2	12	1	1	1	1	1	1	1	1	1	1
01-01-07-02-01-02-13.mp4	AV	Speech	Disgust	Strong	Kids	R2	A13	1	1	7	2	1	2	13	1	0	0	0	1	1	0	1	0	1
01-01-07-02-01-02-14.mp4	AV	Speech	Disgust	Strong	Kids	R2	A14	1	1	7	2	1	2	14	1	0	1	1	0	0	0	0	0	1
01-01-07-02-01-02-15.mp4	AV	Speech	Disgust	Strong	Kids	R2	A15	1	1	7	2	1	2	15	1	1	1	0	1	1	1	1	1	1
01-01-07-02-01-02-16.mp4	AV	Speech	Disgust	Strong	Kids	R2	A16	1	1	7	2	1	2	16	1	1	1	1	1	1	1	1	1	1
01-01-07-02-01-02-17.mp4	AV	Speech	Disgust	Strong	Kids	R2	A17	1	1	7	2	1	2	17	1	1	1	1	1	1	1	1	1	1
01-01-07-02-01-02-18.mp4	AV	Speech	Disgust	Strong	Kids	R2	A18	1	1	7	2	1	2	18	1	1	1	1	1	1	1	1	1	1
01-01-07-02-01-02-19.mp4	AV	Speech	Disgust	Strong	Kids	R2	A19	1	1	7	2	1	2	19	1	1	1	1	1	1	0	1	1	1
01-01-07-02-01-02-20.mp4	AV	Speech	Disgust	Strong	Kids	R2	A20	1	1	7	2	1	2	20	1	1	1	0	1	1	1	1	1	1
01-01-07-02-01-02-21.mp4	AV	Speech	Disgust	Strong	Kids	R2	A21	1	1	7	2	1	2	21	1	1	1	0	0	1	1	1	0	1
01-01-07-02-01-02-22.mp4	AV	Speech	Disgust	Strong	Kids	R2	A22	1	1	7	2	1	2	22	1	1	0	1	1	0	1	1	1	1
01-01-07-02-01-02-23.mp4	AV	Speech	Disgust	Strong	Kids	R2	A23	1	1	7	2	1	2	23	1	1	1	1	1	1	1	1	1	0
01-01-07-02-01-02-24.mp4	AV	Speech	Disgust	Strong	Kids	R2	A24	1	1	7	2	1	2	24	1	1	1	1	1	1	1	1	1	1
01-01-07-02-02-01-01.mp4	AV	Speech	Disgust	Strong	Dogs	R1	A1	1	1	7	2	2	1	1	1	1	1	1	1	1	1	1	1	1
01-01-07-02-02-01-02.mp4	AV	Speech	Disgust	Strong	Dogs	R1	A2	1	1	7	2	2	1	2	1	1	1	1	1	1	1	1	1	1
01-01-07-02-02-01-03.mp4	AV	Speech	Disgust	Strong	Dogs	R1	A3	1	1	7	2	2	1	3	1	1	1	1	0	1	1	1	1	1
01-01-07-02-02-01-04.mp4	AV	Speech	Disgust	Strong	Dogs	R1	A4	1	1	7	2	2	1	4	1	1	1	1	1	0	1	1	1	1
01-01-07-02-02-01-05.mp4	AV	Speech	Disgust	Strong	Dogs	R1	A5	1	1	7	2	2	1	5	1	1	1	1	1	1	0	1	1	1
01-01-07-02-02-01-06.mp4	AV	Speech	Disgust	Strong	Dogs	R1	A6	1	1	7	2	2	1	6	1	1	1	1	1	1	1	1	1	1
01-01-07-02-02-01-07.mp4	AV	Speech	Disgust	Strong	Dogs	R1	A7	1	1	7	2	2	1	7	1	1	1	1	1	1	1	1	0	1
01-01-07-02-02-01-08.mp4	AV	Speech	Disgust	Strong	Dogs	R1	A8	1	1	7	2	2	1	8	1	1	1	1	1	1	1	1	1	1
01-01-07-02-02-01-09.mp4	AV	Speech	Disgust	Strong	Dogs	R1	A9	1	1	7	2	2	1	9	1	1	1	1	1	1	0	1	0	1
01-01-07-02-02-01-10.mp4	AV	Speech	Disgust	Strong	Dogs	R1	A10	1	1	7	2	2	1	10	1	1	1	1	1	1	1	1	1	1
01-01-07-02-02-01-11.mp4	AV	Speech	Disgust	Strong	Dogs	R1	A11	1	1	7	2	2	1	11	0	1	1	0	1	1	1	1	1	0
01-01-07-02-02-01-12.mp4	AV	Speech	Disgust	Strong	Dogs	R1	A12	1	1	7	2	2	1	12	1	0	1	1	1	1	1	1	1	1
01-01-07-02-02-01-13.mp4	AV	Speech	Disgust	Strong	Dogs	R1	A13	1	1	7	2	2	1	13	1	1	0	1	1	1	1	1	1	1
01-01-07-02-02-01-14.mp4	AV	Speech	Disgust	Strong	Dogs	R1	A14	1	1	7	2	2	1	14	1	1	1	1	0	1	1	1	1	1
01-01-07-02-02-01-15.mp4	AV	Speech	Disgust	Strong	Dogs	R1	A15	1	1	7	2	2	1	15	1	1	0	1	1	0	0	1	1	1
01-01-07-02-02-01-16.mp4	AV	Speech	Disgust	Strong	Dogs	R1	A16	1	1	7	2	2	1	16	1	1	1	1	1	1	1	1	1	1
01-01-07-02-02-01-17.mp4	AV	Speech	Disgust	Strong	Dogs	R1	A17	1	1	7	2	2	1	17	1	1	1	1	1	1	0	1	1	1
01-01-07-02-02-01-18.mp4	AV	Speech	Disgust	Strong	Dogs	R1	A18	1	1	7	2	2	1	18	1	1	1	1	1	1	1	1	1	1
01-01-07-02-02-01-19.mp4	AV	Speech	Disgust	Strong	Dogs	R1	A19	1	1	7	2	2	1	19	1	1	1	1	1	1	1	1	1	0
01-01-07-02-02-01-20.mp4	AV	Speech	Disgust	Strong	Dogs	R1	A20	1	1	7	2	2	1	20	1	1	1	1	1	1	0	0	1	1
01-01-07-02-02-01-21.mp4	AV	Speech	Disgust	Strong	Dogs	R1	A21	1	1	7	2	2	1	21	1	1	1	1	1	1	1	1	1	1
01-01-07-02-02-01-22.mp4	AV	Speech	Disgust	Strong	Dogs	R1	A22	1	1	7	2	2	1	22	1	1	1	1	1	1	1	1	0	1
01-01-07-02-02-01-23.mp4	AV	Speech	Disgust	Strong	Dogs	R1	A23	1	1	7	2	2	1	23	1	1	1	1	1	1	1	1	1	1
01-01-07-02-02-01-24.mp4	AV	Speech	Disgust	Strong	Dogs	R1	A24	1	1	7	2	2	1	24	1	1	1	1	1	1	1	1	1	1
01-01-07-02-02-02-01.mp4	AV	Speech	Disgust	Strong	Dogs	R2	A1	1	1	7	2	2	2	1	1	1	1	0	1	1	1	1	1	1
01-01-07-02-02-02-02.mp4	AV	Speech	Disgust	Strong	Dogs	R2	A2	1	1	7	2	2	2	2	1	1	1	1	1	1	1	1	1	1
01-01-07-02-02-02-03.mp4	AV	Speech	Disgust	Strong	Dogs	R2	A3	1	1	7	2	2	2	3	1	1	1	1	1	1	0	1	1	1
01-01-07-02-02-02-04.mp4	AV	Speech	Disgust	Strong	Dogs	R2	A4	1	1	7	2	2	2	4	1	1	1	1	1	1	1	1	1	1
01-01-07-02-02-02-05.mp4	AV	Speech	Disgust	Strong	Dogs	R2	A5	1	1	7	2	2	2	5	1	1	1	1	1	1	1	1	1	1
01-01-07-02-02-02-06.mp4	AV	Speech	Disgust	Strong	Dogs	R2	A6	1	1	7	2	2	2	6	1	1	1	1	1	1	1	1	1	1
01-01-07-02-02-02-07.mp4	AV	Speech	Disgust	Strong	Dogs	R2	A7	1	1	7	2	2	2	7	1	1	1	1	1	1	1	1	1	1
01-01-07-02-02-02-08.mp4	AV	Speech	Disgust	Strong	Dogs	R2	A8	1	1	7	2	2	2	8	1	1	1	1	1	1	1	1	1	1
01-01-07-02-02-02-09.mp4	AV	Speech	Disgust	Strong	Dogs	R2	A9	1	1	7	2	2	2	9	0	1	1	1	0	1	1	0	0	1
01-01-07-02-02-02-10.mp4	AV	Speech	Disgust	Strong	Dogs	R2	A10	1	1	7	2	2	2	10	0	1	1	1	0	1	1	0	0	1
01-01-07-02-02-02-11.mp4	AV	Speech	Disgust	Strong	Dogs	R2	A11	1	1	7	2	2	2	11	1	0	1	1	1	1	1	1	1	1
01-01-07-02-02-02-12.mp4	AV	Speech	Disgust	Strong	Dogs	R2	A12	1	1	7	2	2	2	12	1	1	1	1	1	1	1	1	1	1
01-01-07-02-02-02-13.mp4	AV	Speech	Disgust	Strong	Dogs	R2	A13	1	1	7	2	2	2	13	1	1	1	1	1	1	1	1	0	1
01-01-07-02-02-02-14.mp4	AV	Speech	Disgust	Strong	Dogs	R2	A14	1	1	7	2	2	2	14	1	1	1	0	1	1	1	1	1	1
01-01-07-02-02-02-15.mp4	AV	Speech	Disgust	Strong	Dogs	R2	A15	1	1	7	2	2	2	15	1	1	0	1	0	1	1	1	1	1
01-01-07-02-02-02-16.mp4	AV	Speech	Disgust	Strong	Dogs	R2	A16	1	1	7	2	2	2	16	1	1	1	1	1	1	1	0	1	1
01-01-07-02-02-02-17.mp4	AV	Speech	Disgust	Strong	Dogs	R2	A17	1	1	7	2	2	2	17	1	1	1	1	1	1	1	1	1	1
01-01-07-02-02-02-18.mp4	AV	Speech	Disgust	Strong	Dogs	R2	A18	1	1	7	2	2	2	18	1	1	1	1	1	0	1	1	1	1
01-01-07-02-02-02-19.mp4	AV	Speech	Disgust	Strong	Dogs	R2	A19	1	1	7	2	2	2	19	1	1	1	1	1	1	1	0	1	1
01-01-07-02-02-02-20.mp4	AV	Speech	Disgust	Strong	Dogs	R2	A20	1	1	7	2	2	2	20	1	0	1	1	1	1	1	1	1	1
01-01-07-02-02-02-21.mp4	AV	Speech	Disgust	Strong	Dogs	R2	A21	1	1	7	2	2	2	21	1	1	1	1	1	1	0	1	1	1
01-01-07-02-02-02-22.mp4	AV	Speech	Disgust	Strong	Dogs	R2	A22	1	1	7	2	2	2	22	1	1	1	1	1	1	1	1	1	1
01-01-07-02-02-02-23.mp4	AV	Speech	Disgust	Strong	Dogs	R2	A23	1	1	7	2	2	2	23	0	1	1	1	1	1	1	1	1	1
01-01-07-02-02-02-24.mp4	AV	Speech	Disgust	Strong	Dogs	R2	A24	1	1	7	2	2	2	24	1	1	1	1	1	1	1	1	1	1
01-01-08-01-01-01-01.mp4	AV	Speech	Surprise	Normal	Kids	R1	A1	1	1	8	1	1	1	1	0	1	1	0	1	1	1	0	0	0
01-01-08-01-01-01-02.mp4	AV	Speech	Surprise	Normal	Kids	R1	A2	1	1	8	1	1	1	2	1	1	1	1	1	1	1	1	0	1
01-01-08-01-01-01-03.mp4	AV	Speech	Surprise	Normal	Kids	R1	A3	1	1	8	1	1	1	3	0	0	1	0	0	0	1	0	0	0
01-01-08-01-01-01-04.mp4	AV	Speech	Surprise	Normal	Kids	R1	A4	1	1	8	1	1	1	4	1	1	1	1	1	1	1	1	1	1
01-01-08-01-01-01-05.mp4	AV	Speech	Surprise	Normal	Kids	R1	A5	1	1	8	1	1	1	5	1	0	1	1	1	1	0	1	1	1
01-01-08-01-01-01-06.mp4	AV	Speech	Surprise	Normal	Kids	R1	A6	1	1	8	1	1	1	6	1	1	1	1	1	1	1	1	1	1
01-01-08-01-01-01-07.mp4	AV	Speech	Surprise	Normal	Kids	R1	A7	1	1	8	1	1	1	7	0	0	1	1	1	1	1	1	1	1
01-01-08-01-01-01-08.mp4	AV	Speech	Surprise	Normal	Kids	R1	A8	1	1	8	1	1	1	8	1	1	1	1	1	1	1	1	0	1
01-01-08-01-01-01-09.mp4	AV	Speech	Surprise	Normal	Kids	R1	A9	1	1	8	1	1	1	9	1	1	1	1	0	1	1	1	0	1
01-01-08-01-01-01-10.mp4	AV	Speech	Surprise	Normal	Kids	R1	A10	1	1	8	1	1	1	10	1	1	1	1	1	1	1	1	1	1
01-01-08-01-01-01-11.mp4	AV	Speech	Surprise	Normal	Kids	R1	A11	1	1	8	1	1	1	11	1	1	1	1	1	1	1	1	1	0
01-01-08-01-01-01-12.mp4	AV	Speech	Surprise	Normal	Kids	R1	A12	1	1	8	1	1	1	12	1	1	1	1	1	1	1	1	1	1
01-01-08-01-01-01-13.mp4	AV	Speech	Surprise	Normal	Kids	R1	A13	1	1	8	1	1	1	13	1	1	1	0	1	1	1	0	1	0
01-01-08-01-01-01-14.mp4	AV	Speech	Surprise	Normal	Kids	R1	A14	1	1	8	1	1	1	14	1	1	1	1	1	1	1	1	1	1
01-01-08-01-01-01-15.mp4	AV	Speech	Surprise	Normal	Kids	R1	A15	1	1	8	1	1	1	15	0	0	0	1	1	0	0	0	0	1
01-01-08-01-01-01-16.mp4	AV	Speech	Surprise	Normal	Kids	R1	A16	1	1	8	1	1	1	16	0	0	1	0	1	1	1	0	0	1
01-01-08-01-01-01-17.mp4	AV	Speech	Surprise	Normal	Kids	R1	A17	1	1	8	1	1	1	17	1	0	1	1	1	1	1	0	0	1
01-01-08-01-01-01-18.mp4	AV	Speech	Surprise	Normal	Kids	R1	A18	1	1	8	1	1	1	18	1	1	1	0	1	0	0	1	1	1
01-01-08-01-01-01-19.mp4	AV	Speech	Surprise	Normal	Kids	R1	A19	1	1	8	1	1	1	19	1	1	0	1	0	1	1	1	1	1
01-01-08-01-01-01-20.mp4	AV	Speech	Surprise	Normal	Kids	R1	A20	1	1	8	1	1	1	20	0	1	1	1	1	1	1	1	1	1
01-01-08-01-01-01-21.mp4	AV	Speech	Surprise	Normal	Kids	R1	A21	1	1	8	1	1	1	21	0	1	0	1	0	1	1	1	1	1
01-01-08-01-01-01-22.mp4	AV	Speech	Surprise	Normal	Kids	R1	A22	1	1	8	1	1	1	22	0	1	1	1	1	1	1	1	1	1
01-01-08-01-01-01-23.mp4	AV	Speech	Surprise	Normal	Kids	R1	A23	1	1	8	1	1	1	23	0	1	0	1	0	1	0	1	0	0
01-01-08-01-01-01-24.mp4	AV	Speech	Surprise	Normal	Kids	R1	A24	1	1	8	1	1	1	24	0	1	1	1	1	1	1	1	0	1
01-01-08-01-01-02-01.mp4	AV	Speech	Surprise	Normal	Kids	R2	A1	1	1	8	1	1	2	1	1	1	1	1	0	0	1	1	0	1
01-01-08-01-01-02-02.mp4	AV	Speech	Surprise	Normal	Kids	R2	A2	1	1	8	1	1	2	2	1	1	1	1	1	1	1	1	1	1
01-01-08-01-01-02-03.mp4	AV	Speech	Surprise	Normal	Kids	R2	A3	1	1	8	1	1	2	3	0	1	1	1	0	0	1	1	1	0
01-01-08-01-01-02-04.mp4	AV	Speech	Surprise	Normal	Kids	R2	A4	1	1	8	1	1	2	4	1	1	1	1	1	1	1	1	1	1
01-01-08-01-01-02-05.mp4	AV	Speech	Surprise	Normal	Kids	R2	A5	1	1	8	1	1	2	5	0	1	1	0	1	0	1	1	1	1
01-01-08-01-01-02-06.mp4	AV	Speech	Surprise	Normal	Kids	R2	A6	1	1	8	1	1	2	6	1	1	1	1	1	1	1	1	1	1
01-01-08-01-01-02-07.mp4	AV	Speech	Surprise	Normal	Kids	R2	A7	1	1	8	1	1	2	7	1	1	1	1	1	1	1	1	1	0
01-01-08-01-01-02-08.mp4	AV	Speech	Surprise	Normal	Kids	R2	A8	1	1	8	1	1	2	8	1	1	1	1	1	1	1	1	1	1
01-01-08-01-01-02-09.mp4	AV	Speech	Surprise	Normal	Kids	R2	A9	1	1	8	1	1	2	9	0	0	1	1	1	1	1	1	1	1
01-01-08-01-01-02-10.mp4	AV	Speech	Surprise	Normal	Kids	R2	A10	1	1	8	1	1	2	10	1	1	0	1	1	1	1	1	1	1
01-01-08-01-01-02-11.mp4	AV	Speech	Surprise	Normal	Kids	R2	A11	1	1	8	1	1	2	11	1	0	1	1	1	1	1	1	1	0
01-01-08-01-01-02-12.mp4	AV	Speech	Surprise	Normal	Kids	R2	A12	1	1	8	1	1	2	12	1	1	1	1	1	1	1	1	1	1
01-01-08-01-01-02-13.mp4	AV	Speech	Surprise	Normal	Kids	R2	A13	1	1	8	1	1	2	13	0	1	1	1	1	1	1	1	1	1
01-01-08-01-01-02-14.mp4	AV	Speech	Surprise	Normal	Kids	R2	A14	1	1	8	1	1	2	14	1	1	1	1	1	1	1	1	1	1
01-01-08-01-01-02-15.mp4	AV	Speech	Surprise	Normal	Kids	R2	A15	1	1	8	1	1	2	15	0	1	0	1	1	0	1	0	0	0
01-01-08-01-01-02-16.mp4	AV	Speech	Surprise	Normal	Kids	R2	A16	1	1	8	1	1	2	16	0	1	1	1	1	1	1	1	1	1
01-01-08-01-01-02-17.mp4	AV	Speech	Surprise	Normal	Kids	R2	A17	1	1	8	1	1	2	17	1	0	0	0	0	1	1	0	1	1
01-01-08-01-01-02-18.mp4	AV	Speech	Surprise	Normal	Kids	R2	A18	1	1	8	1	1	2	18	1	1	1	1	1	1	1	1	1	1
01-01-08-01-01-02-19.mp4	AV	Speech	Surprise	Normal	Kids	R2	A19	1	1	8	1	1	2	19	0	0	1	0	1	0	0	1	1	0
01-01-08-01-01-02-20.mp4	AV	Speech	Surprise	Normal	Kids	R2	A20	1	1	8	1	1	2	20	1	1	1	1	0	1	1	1	0	1
01-01-08-01-01-02-21.mp4	AV	Speech	Surprise	Normal	Kids	R2	A21	1	1	8	1	1	2	21	1	1	1	1	1	1	1	1	1	1
01-01-08-01-01-02-22.mp4	AV	Speech	Surprise	Normal	Kids	R2	A22	1	1	8	1	1	2	22	0	1	1	1	1	1	1	1	1	1
01-01-08-01-01-02-23.mp4	AV	Speech	Surprise	Normal	Kids	R2	A23	1	1	8	1	1	2	23	1	1	1	0	1	1	1	0	0	0
01-01-08-01-01-02-24.mp4	AV	Speech	Surprise	Normal	Kids	R2	A24	1	1	8	1	1	2	24	1	1	1	1	1	1	1	1	1	1
01-01-08-01-02-01-01.mp4	AV	Speech	Surprise	Normal	Dogs	R1	A1	1	1	8	1	2	1	1	0	1	1	1	1	1	1	1	1	1
01-01-08-01-02-01-02.mp4	AV	Speech	Surprise	Normal	Dogs	R1	A2	1	1	8	1	2	1	2	1	1	1	1	1	1	1	1	1	1
01-01-08-01-02-01-03.mp4	AV	Speech	Surprise	Normal	Dogs	R1	A3	1	1	8	1	2	1	3	1	1	1	1	0	1	0	1	1	1
01-01-08-01-02-01-04.mp4	AV	Speech	Surprise	Normal	Dogs	R1	A4	1	1	8	1	2	1	4	0	1	1	0	1	1	0	1	1	1
01-01-08-01-02-01-05.mp4	AV	Speech	Surprise	Normal	Dogs	R1	A5	1	1	8	1	2	1	5	1	0	1	1	1	0	0	0	1	1
01-01-08-01-02-01-06.mp4	AV	Speech	Surprise	Normal	Dogs	R1	A6	1	1	8	1	2	1	6	1	1	1	1	1	1	1	1	1	1
01-01-08-01-02-01-07.mp4	AV	Speech	Surprise	Normal	Dogs	R1	A7	1	1	8	1	2	1	7	1	1	0	1	1	1	1	1	1	1
01-01-08-01-02-01-08.mp4	AV	Speech	Surprise	Normal	Dogs	R1	A8	1	1	8	1	2	1	8	1	1	1	1	1	1	1	1	1	1
01-01-08-01-02-01-09.mp4	AV	Speech	Surprise	Normal	Dogs	R1	A9	1	1	8	1	2	1	9	1	1	0	1	1	1	1	1	1	1
01-01-08-01-02-01-10.mp4	AV	Speech	Surprise	Normal	Dogs	R1	A10	1	1	8	1	2	1	10	1	1	1	1	0	1	1	1	1	1
01-01-08-01-02-01-11.mp4	AV	Speech	Surprise	Normal	Dogs	R1	A11	1	1	8	1	2	1	11	0	1	1	1	1	1	1	1	1	1
01-01-08-01-02-01-12.mp4	AV	Speech	Surprise	Normal	Dogs	R1	A12	1	1	8	1	2	1	12	1	0	1	0	1	1	1	1	1	1
01-01-08-01-02-01-13.mp4	AV	Speech	Surprise	Normal	Dogs	R1	A13	1	1	8	1	2	1	13	1	0	1	1	0	1	1	1	1	0
01-01-08-01-02-01-14.mp4	AV	Speech	Surprise	Normal	Dogs	R1	A14	1	1	8	1	2	1	14	1	1	1	1	1	1	1	1	1	1
01-01-08-01-02-01-15.mp4	AV	Speech	Surprise	Normal	Dogs	R1	A15	1	1	8	1	2	1	15	0	1	1	0	1	1	1	1	0	1
01-01-08-01-02-01-16.mp4	AV	Speech	Surprise	Normal	Dogs	R1	A16	1	1	8	1	2	1	16	1	1	0	1	0	1	1	1	1	1
01-01-08-01-02-01-17.mp4	AV	Speech	Surprise	Normal	Dogs	R1	A17	1	1	8	1	2	1	17	1	1	1	1	1	1	1	0	1	1
01-01-08-01-02-01-18.mp4	AV	Speech	Surprise	Normal	Dogs	R1	A18	1	1	8	1	2	1	18	1	1	1	1	0	1	1	1	1	1
01-01-08-01-02-01-19.mp4	AV	Speech	Surprise	Normal	Dogs	R1	A19	1	1	8	1	2	1	19	1	1	1	1	1	1	1	1	1	0
01-01-08-01-02-01-20.mp4	AV	Speech	Surprise	Normal	Dogs	R1	A20	1	1	8	1	2	1	20	0	1	1	1	1	1	1	1	1	1
01-01-08-01-02-01-21.mp4	AV	Speech	Surprise	Normal	Dogs	R1	A21	1	1	8	1	2	1	21	1	1	1	1	1	1	0	1	1	1
01-01-08-01-02-01-22.mp4	AV	Speech	Surprise	Normal	Dogs	R1	A22	1	1	8	1	2	1	22	1	1	1	1	1	1	1	1	1	1
01-01-08-01-02-01-23.mp4	AV	Speech	Surprise	Normal	Dogs	R1	A23	1	1	8	1	2	1	23	0	1	1	1	1	1	1	1	1	1
01-01-08-01-02-01-24.mp4	AV	Speech	Surprise	Normal	Dogs	R1	A24	1	1	8	1	2	1	24	0	1	0	1	0	1	1	1	1	1
01-01-08-01-02-02-01.mp4	AV	Speech	Surprise	Normal	Dogs	R2	A1	1	1	8	1	2	2	1	1	0	1	1	1	1	1	1	1	0
01-01-08-01-02-02-02.mp4	AV	Speech	Surprise	Normal	Dogs	R2	A2	1	1	8	1	2	2	2	1	1	1	1	1	1	1	1	1	1
01-01-08-01-02-02-03.mp4	AV	Speech	Surprise	Normal	Dogs	R2	A3	1	1	8	1	2	2	3	0	0	1	1	1	1	1	0	1	1
01-01-08-01-02-02-04.mp4	AV	Speech	Surprise	Normal	Dogs	R2	A4	1	1	8	1	2	2	4	1	1	1	1	1	1	1	1	1	1
01-01-08-01-02-02-05.mp4	AV	Speech	Surprise	Normal	Dogs	R2	A5	1	1	8	1	2	2	5	1	1	1	1	1	1	0	0	0	0
01-01-08-01-02-02-06.mp4	AV	Speech	Surprise	Normal	Dogs	R2	A6	1	1	8	1	2	2	6	1	1	1	1	1	1	1	1	1	1
01-01-08-01-02-02-07.mp4	AV	Speech	Surprise	Normal	Dogs	R2	A7	1	1	8	1	2	2	7	1	1	0	1	1	0	1	1	1	1
01-01-08-01-02-02-08.mp4	AV	Speech	Surprise	Normal	Dogs	R2	A8	1	1	8	1	2	2	8	1	1	1	1	1	1	1	1	1	1
01-01-08-01-02-02-09.mp4	AV	Speech	Surprise	Normal	Dogs	R2	A9	1	1	8	1	2	2	9	1	1	1	1	1	0	1	1	1	0
01-01-08-01-02-02-10.mp4	AV	Speech	Surprise	Normal	Dogs	R2	A10	1	1	8	1	2	2	10	1	1	1	1	1	1	1	1	1	1
01-01-08-01-02-02-11.mp4	AV	Speech	Surprise	Normal	Dogs	R2	A11	1	1	8	1	2	2	11	1	1	1	1	1	1	1	1	1	1
01-01-08-01-02-02-12.mp4	AV	Speech	Surprise	Normal	Dogs	R2	A12	1	1	8	1	2	2	12	1	1	0	0	1	0	1	0	0	0
01-01-08-01-02-02-13.mp4	AV	Speech	Surprise	Normal	Dogs	R2	A13	1	1	8	1	2	2	13	0	1	1	1	1	1	1	1	1	0
01-01-08-01-02-02-14.mp4	AV	Speech	Surprise	Normal	Dogs	R2	A14	1	1	8	1	2	2	14	0	1	1	1	1	1	1	1	1	1
01-01-08-01-02-02-15.mp4	AV	Speech	Surprise	Normal	Dogs	R2	A15	1	1	8	1	2	2	15	1	1	1	1	0	1	1	1	1	1
01-01-08-01-02-02-16.mp4	AV	Speech	Surprise	Normal	Dogs	R2	A16	1	1	8	1	2	2	16	1	1	1	1	1	1	1	1	0	0
01-01-08-01-02-02-17.mp4	AV	Speech	Surprise	Normal	Dogs	R2	A17	1	1	8	1	2	2	17	0	1	0	1	1	1	1	1	1	1
01-01-08-01-02-02-18.mp4	AV	Speech	Surprise	Normal	Dogs	R2	A18	1	1	8	1	2	2	18	1	0	0	1	1	1	1	1	1	1
01-01-08-01-02-02-19.mp4	AV	Speech	Surprise	Normal	Dogs	R2	A19	1	1	8	1	2	2	19	1	1	0	1	1	1	1	1	0	1
01-01-08-01-02-02-20.mp4	AV	Speech	Surprise	Normal	Dogs	R2	A20	1	1	8	1	2	2	20	1	1	1	0	1	0	1	1	0	1
01-01-08-01-02-02-21.mp4	AV	Speech	Surprise	Normal	Dogs	R2	A21	1	1	8	1	2	2	21	1	1	1	0	1	1	0	1	1	1
01-01-08-01-02-02-22.mp4	AV	Speech	Surprise	Normal	Dogs	R2	A22	1	1	8	1	2	2	22	1	1	1	1	1	1	1	1	1	1
01-01-08-01-02-02-23.mp4	AV	Speech	Surprise	Normal	Dogs	R2	A23	1	1	8	1	2	2	23	1	1	1	0	1	1	1	1	1	1
01-01-08-01-02-02-24.mp4	AV	Speech	Surprise	Normal	Dogs	R2	A24	1	1	8	1	2	2	24	1	0	1	0	0	0	0	1	0	0
01-01-08-02-01-01-01.mp4	AV	Speech	Surprise	Strong	Kids	R1	A1	1	1	8	2	1	1	1	1	1	1	1	1	1	1	1	1	1
01-01-08-02-01-01-02.mp4	AV	Speech	Surprise	Strong	Kids	R1	A2	1	1	8	2	1	1	2	1	1	1	1	1	1	1	0	1	1
01-01-08-02-01-01-03.mp4	AV	Speech	Surprise	Strong	Kids	R1	A3	1	1	8	2	1	1	3	1	1	1	0	1	1	1	1	1	1
01-01-08-02-01-01-04.mp4	AV	Speech	Surprise	Strong	Kids	R1	A4	1	1	8	2	1	1	4	1	1	1	1	1	1	1	1	1	1
01-01-08-02-01-01-05.mp4	AV	Speech	Surprise	Strong	Kids	R1	A5	1	1	8	2	1	1	5	1	1	1	1	1	1	1	1	1	1
01-01-08-02-01-01-06.mp4	AV	Speech	Surprise	Strong	Kids	R1	A6	1	1	8	2	1	1	6	1	1	1	1	1	1	1	1	1	1
01-01-08-02-01-01-07.mp4	AV	Speech	Surprise	Strong	Kids	R1	A7	1	1	8	2	1	1	7	1	1	1	1	1	1	0	1	1	1
01-01-08-02-01-01-08.mp4	AV	Speech	Surprise	Strong	Kids	R1	A8	1	1	8	2	1	1	8	1	1	1	1	0	1	1	1	1	1
01-01-08-02-01-01-09.mp4	AV	Speech	Surprise	Strong	Kids	R1	A9	1	1	8	2	1	1	9	1	1	1	1	0	1	1	1	1	1
01-01-08-02-01-01-10.mp4	AV	Speech	Surprise	Strong	Kids	R1	A10	1	1	8	2	1	1	10	1	1	1	1	1	1	1	1	1	1
01-01-08-02-01-01-11.mp4	AV	Speech	Surprise	Strong	Kids	R1	A11	1	1	8	2	1	1	11	1	1	1	1	1	1	1	1	1	1
01-01-08-02-01-01-12.mp4	AV	Speech	Surprise	Strong	Kids	R1	A12	1	1	8	2	1	1	12	1	1	1	1	1	1	1	1	1	1
01-01-08-02-01-01-13.mp4	AV	Speech	Surprise	Strong	Kids	R1	A13	1	1	8	2	1	1	13	1	1	1	1	1	1	1	0	1	1
01-01-08-02-01-01-14.mp4	AV	Speech	Surprise	Strong	Kids	R1	A14	1	1	8	2	1	1	14	1	1	1	0	1	1	1	1	1	1
01-01-08-02-01-01-15.mp4	AV	Speech	Surprise	Strong	Kids	R1	A15	1	1	8	2	1	1	15	1	1	1	1	0	0	0	0	1	0
01-01-08-02-01-01-16.mp4	AV	Speech	Surprise	Strong	Kids	R1	A16	1	1	8	2	1	1	16	1	1	0	1	0	1	1	1	1	1
01-01-08-02-01-01-17.mp4	AV	Speech	Surprise	Strong	Kids	R1	A17	1	1	8	2	1	1	17	1	1	1	1	1	1	1	1	1	1
01-01-08-02-01-01-18.mp4	AV	Speech	Surprise	Strong	Kids	R1	A18	1	1	8	2	1	1	18	1	1	1	1	1	1	1	1	1	1
01-01-08-02-01-01-19.mp4	AV	Speech	Surprise	Strong	Kids	R1	A19	1	1	8	2	1	1	19	1	1	1	1	1	1	1	1	1	1
01-01-08-02-01-01-20.mp4	AV	Speech	Surprise	Strong	Kids	R1	A20	1	1	8	2	1	1	20	1	1	1	1	1	0	1	1	1	1
01-01-08-02-01-01-21.mp4	AV	Speech	Surprise	Strong	Kids	R1	A21	1	1	8	2	1	1	21	1	1	1	1	1	1	1	1	1	1
01-01-08-02-01-01-22.mp4	AV	Speech	Surprise	Strong	Kids	R1	A22	1	1	8	2	1	1	22	1	1	1	1	1	1	1	1	1	1
01-01-08-02-01-01-23.mp4	AV	Speech	Surprise	Strong	Kids	R1	A23	1	1	8	2	1	1	23	1	1	1	1	1	1	0	1	1	1
01-01-08-02-01-01-24.mp4	AV	Speech	Surprise	Strong	Kids	R1	A24	1	1	8	2	1	1	24	1	1	1	1	1	1	1	1	1	1
01-01-08-02-01-02-01.mp4	AV	Speech	Surprise	Strong	Kids	R2	A1	1	1	8	2	1	2	1	1	0	1	0	1	1	1	0	1	0
01-01-08-02-01-02-02.mp4	AV	Speech	Surprise	Strong	Kids	R2	A2	1	1	8	2	1	2	2	1	1	1	1	1	1	1	1	1	1
01-01-08-02-01-02-03.mp4	AV	Speech	Surprise	Strong	Kids	R2	A3	1	1	8	2	1	2	3	1	0	1	1	1	1	1	1	1	1
01-01-08-02-01-02-04.mp4	AV	Speech	Surprise	Strong	Kids	R2	A4	1	1	8	2	1	2	4	1	1	1	1	1	1	1	1	1	1
01-01-08-02-01-02-05.mp4	AV	Speech	Surprise	Strong	Kids	R2	A5	1	1	8	2	1	2	5	1	1	1	0	1	1	1	1	1	0
01-01-08-02-01-02-06.mp4	AV	Speech	Surprise	Strong	Kids	R2	A6	1	1	8	2	1	2	6	1	1	1	1	1	1	1	0	1	1
01-01-08-02-01-02-07.mp4	AV	Speech	Surprise	Strong	Kids	R2	A7	1	1	8	2	1	2	7	1	1	1	1	1	1	1	1	1	1
01-01-08-02-01-02-08.mp4	AV	Speech	Surprise	Strong	Kids	R2	A8	1	1	8	2	1	2	8	1	1	1	1	1	1	1	1	1	1
01-01-08-02-01-02-09.mp4	AV	Speech	Surprise	Strong	Kids	R2	A9	1	1	8	2	1	2	9	0	1	1	1	1	1	1	1	1	1
01-01-08-02-01-02-10.mp4	AV	Speech	Surprise	Strong	Kids	R2	A10	1	1	8	2	1	2	10	1	1	1	1	1	1	1	0	1	1
01-01-08-02-01-02-11.mp4	AV	Speech	Surprise	Strong	Kids	R2	A11	1	1	8	2	1	2	11	1	1	1	1	1	1	1	1	1	1
01-01-08-02-01-02-12.mp4	AV	Speech	Surprise	Strong	Kids	R2	A12	1	1	8	2	1	2	12	1	1	1	1	0	0	1	1	1	1
01-01-08-02-01-02-13.mp4	AV	Speech	Surprise	Strong	Kids	R2	A13	1	1	8	2	1	2	13	0	1	0	1	0	0	1	1	1	0
01-01-08-02-01-02-14.mp4	AV	Speech	Surprise	Strong	Kids	R2	A14	1	1	8	2	1	2	14	1	1	1	1	1	1	1	1	1	1
01-01-08-02-01-02-15.mp4	AV	Speech	Surprise	Strong	Kids	R2	A15	1	1	8	2	1	2	15	0	0	0	0	0	0	0	0	0	1
01-01-08-02-01-02-16.mp4	AV	Speech	Surprise	Strong	Kids	R2	A16	1	1	8	2	1	2	16	1	1	0	1	1	1	1	1	1	1
01-01-08-02-01-02-17.mp4	AV	Speech	Surprise	Strong	Kids	R2	A17	1	1	8	2	1	2	17	1	1	1	0	1	0	1	1	1	1
01-01-08-02-01-02-18.mp4	AV	Speech	Surprise	Strong	Kids	R2	A18	1	1	8	2	1	2	18	1	1	1	1	1	0	1	1	1	1
01-01-08-02-01-02-19.mp4	AV	Speech	Surprise	Strong	Kids	R2	A19	1	1	8	2	1	2	19	0	0	1	1	1	1	1	1	1	1
01-01-08-02-01-02-20.mp4	AV	Speech	Surprise	Strong	Kids	R2	A20	1	1	8	2	1	2	20	1	0	1	1	1	1	1	1	1	1
01-01-08-02-01-02-21.mp4	AV	Speech	Surprise	Strong	Kids	R2	A21	1	1	8	2	1	2	21	0	1	1	1	1	0	1	1	1	1
01-01-08-02-01-02-22.mp4	AV	Speech	Surprise	Strong	Kids	R2	A22	1	1	8	2	1	2	22	1	1	1	1	1	1	1	1	1	1
01-01-08-02-01-02-23.mp4	AV	Speech	Surprise	Strong	Kids	R2	A23	1	1	8	2	1	2	23	1	0	1	1	1	0	1	1	0	1
01-01-08-02-01-02-24.mp4	AV	Speech	Surprise	Strong	Kids	R2	A24	1	1	8	2	1	2	24	0	1	1	0	1	1	1	1	1	1
01-01-08-02-02-01-01.mp4	AV	Speech	Surprise	Strong	Dogs	R1	A1	1	1	8	2	2	1	1	0	0	1	0	1	1	1	0	1	1
01-01-08-02-02-01-02.mp4	AV	Speech	Surprise	Strong	Dogs	R1	A2	1	1	8	2	2	1	2	1	1	1	1	1	1	1	1	1	1
01-01-08-02-02-01-03.mp4	AV	Speech	Surprise	Strong	Dogs	R1	A3	1	1	8	2	2	1	3	1	1	0	1	1	1	1	1	0	1
01-01-08-02-02-01-04.mp4	AV	Speech	Surprise	Strong	Dogs	R1	A4	1	1	8	2	2	1	4	1	1	1	1	1	1	1	1	1	1
01-01-08-02-02-01-05.mp4	AV	Speech	Surprise	Strong	Dogs	R1	A5	1	1	8	2	2	1	5	1	0	1	1	1	1	1	1	1	1
01-01-08-02-02-01-06.mp4	AV	Speech	Surprise	Strong	Dogs	R1	A6	1	1	8	2	2	1	6	1	1	1	1	1	1	1	0	0	0
01-01-08-02-02-01-07.mp4	AV	Speech	Surprise	Strong	Dogs	R1	A7	1	1	8	2	2	1	7	1	1	0	1	1	1	1	1	1	1
01-01-08-02-02-01-08.mp4	AV	Speech	Surprise	Strong	Dogs	R1	A8	1	1	8	2	2	1	8	1	1	1	1	1	1	1	1	1	1
01-01-08-02-02-01-09.mp4	AV	Speech	Surprise	Strong	Dogs	R1	A9	1	1	8	2	2	1	9	1	1	1	1	1	0	1	1	1	1
01-01-08-02-02-01-10.mp4	AV	Speech	Surprise	Strong	Dogs	R1	A10	1	1	8	2	2	1	10	1	1	0	1	1	1	1	1	1	1
01-01-08-02-02-01-11.mp4	AV	Speech	Surprise	Strong	Dogs	R1	A11	1	1	8	2	2	1	11	1	1	1	1	1	1	1	1	1	1
01-01-08-02-02-01-12.mp4	AV	Speech	Surprise	Strong	Dogs	R1	A12	1	1	8	2	2	1	12	1	1	1	1	1	1	1	1	1	1
01-01-08-02-02-01-13.mp4	AV	Speech	Surprise	Strong	Dogs	R1	A13	1	1	8	2	2	1	13	1	0	0	1	1	1	1	1	0	0
01-01-08-02-02-01-14.mp4	AV	Speech	Surprise	Strong	Dogs	R1	A14	1	1	8	2	2	1	14	0	1	1	1	1	1	1	1	1	1
01-01-08-02-02-01-15.mp4	AV	Speech	Surprise	Strong	Dogs	R1	A15	1	1	8	2	2	1	15	0	0	1	0	0	0	1	1	1	0
01-01-08-02-02-01-16.mp4	AV	Speech	Surprise	Strong	Dogs	R1	A16	1	1	8	2	2	1	16	1	1	0	1	1	1	0	1	1	1
01-01-08-02-02-01-17.mp4	AV	Speech	Surprise	Strong	Dogs	R1	A17	1	1	8	2	2	1	17	1	1	0	1	1	0	0	1	1	1
01-01-08-02-02-01-18.mp4	AV	Speech	Surprise	Strong	Dogs	R1	A18	1	1	8	2	2	1	18	1	1	0	0	1	1	1	0	1	1
01-01-08-02-02-01-19.mp4	AV	Speech	Surprise	Strong	Dogs	R1	A19	1	1	8	2	2	1	19	1	1	1	1	1	1	1	1	1	1
01-01-08-02-02-01-20.mp4	AV	Speech	Surprise	Strong	Dogs	R1	A20	1	1	8	2	2	1	20	0	1	1	1	1	1	0	1	1	0
01-01-08-02-02-01-21.mp4	AV	Speech	Surprise	Strong	Dogs	R1	A21	1	1	8	2	2	1	21	1	1	1	1	1	1	1	1	1	1
01-01-08-02-02-01-22.mp4	AV	Speech	Surprise	Strong	Dogs	R1	A22	1	1	8	2	2	1	22	0	1	1	1	1	0	0	1	1	1
01-01-08-02-02-01-23.mp4	AV	Speech	Surprise	Strong	Dogs	R1	A23	1	1	8	2	2	1	23	1	1	1	1	0	1	1	1	0	1
01-01-08-02-02-01-24.mp4	AV	Speech	Surprise	Strong	Dogs	R1	A24	1	1	8	2	2	1	24	1	1	0	0	1	0	1	1	1	1
01-01-08-02-02-02-01.mp4	AV	Speech	Surprise	Strong	Dogs	R2	A1	1	1	8	2	2	2	1	1	1	1	1	1	1	1	0	0	1
01-01-08-02-02-02-02.mp4	AV	Speech	Surprise	Strong	Dogs	R2	A2	1	1	8	2	2	2	2	1	1	1	1	1	1	1	1	1	1
01-01-08-02-02-02-03.mp4	AV	Speech	Surprise	Strong	Dogs	R2	A3	1	1	8	2	2	2	3	1	1	1	1	1	0	1	1	1	1
01-01-08-02-02-02-04.mp4	AV	Speech	Surprise	Strong	Dogs	R2	A4	1	1	8	2	2	2	4	1	1	1	1	0	1	1	1	1	1
01-01-08-02-02-02-05.mp4	AV	Speech	Surprise	Strong	Dogs	R2	A5	1	1	8	2	2	2	5	1	1	1	1	0	1	1	1	1	1
01-01-08-02-02-02-06.mp4	AV	Speech	Surprise	Strong	Dogs	R2	A6	1	1	8	2	2	2	6	1	1	1	1	1	1	1	1	1	1
01-01-08-02-02-02-07.mp4	AV	Speech	Surprise	Strong	Dogs	R2	A7	1	1	8	2	2	2	7	1	1	1	1	1	1	1	1	1	0
01-01-08-02-02-02-08.mp4	AV	Speech	Surprise	Strong	Dogs	R2	A8	1	1	8	2	2	2	8	1	1	1	1	0	0	1	0	1	1
01-01-08-02-02-02-09.mp4	AV	Speech	Surprise	Strong	Dogs	R2	A9	1	1	8	2	2	2	9	1	1	1	0	1	1	1	1	1	1
01-01-08-02-02-02-10.mp4	AV	Speech	Surprise	Strong	Dogs	R2	A10	1	1	8	2	2	2	10	1	1	1	1	1	1	1	1	1	1
01-01-08-02-02-02-11.mp4	AV	Speech	Surprise	Strong	Dogs	R2	A11	1	1	8	2	2	2	11	1	0	1	1	0	1	1	1	1	1
01-01-08-02-02-02-12.mp4	AV	Speech	Surprise	Strong	Dogs	R2	A12	1	1	8	2	2	2	12	1	0	1	1	1	1	1	1	1	1
01-01-08-02-02-02-13.mp4	AV	Speech	Surprise	Strong	Dogs	R2	A13	1	1	8	2	2	2	13	1	1	1	1	1	1	0	1	0	1
01-01-08-02-02-02-14.mp4	AV	Speech	Surprise	Strong	Dogs	R2	A14	1	1	8	2	2	2	14	1	0	1	1	1	1	1	1	1	1
01-01-08-02-02-02-15.mp4	AV	Speech	Surprise	Strong	Dogs	R2	A15	1	1	8	2	2	2	15	0	0	0	0	0	1	0	0	0	0
01-01-08-02-02-02-16.mp4	AV	Speech	Surprise	Strong	Dogs	R2	A16	1	1	8	2	2	2	16	1	1	1	1	1	1	0	1	1	1
01-01-08-02-02-02-17.mp4	AV	Speech	Surprise	Strong	Dogs	R2	A17	1	1	8	2	2	2	17	1	1	1	1	1	1	1	1	1	1
01-01-08-02-02-02-18.mp4	AV	Speech	Surprise	Strong	Dogs	R2	A18	1	1	8	2	2	2	18	1	0	1	1	1	1	1	1	0	1
01-01-08-02-02-02-19.mp4	AV	Speech	Surprise	Strong	Dogs	R2	A19	1	1	8	2	2	2	19	1	1	0	1	1	1	1	1	1	1
01-01-08-02-02-02-20.mp4	AV	Speech	Surprise	Strong	Dogs	R2	A20	1	1	8	2	2	2	20	1	1	1	1	1	1	0	1	1	1
01-01-08-02-02-02-21.mp4	AV	Speech	Surprise	Strong	Dogs	R2	A21	1	1	8	2	2	2	21	1	1	1	1	1	1	1	1	1	1
01-01-08-02-02-02-22.mp4	AV	Speech	Surprise	Strong	Dogs	R2	A22	1	1	8	2	2	2	22	1	1	1	1	1	1	0	1	1	1
01-01-08-02-02-02-23.mp4	AV	Speech	Surprise	Strong	Dogs	R2	A23	1	1	8	2	2	2	23	1	1	1	1	1	1	1	0	1	0
01-01-08-02-02-02-24.mp4	AV	Speech	Surprise	Strong	Dogs	R2	A24	1	1	8	2	2	2	24	1	0	1	1	1	1	0	0	0	1
02-01-01-01-01-01-01.mp4	VO	Speech	Neutral	Normal	Kids	R1	A1	2	1	1	1	1	1	1	1	1	1	1	1	1	1	1	1	1
02-01-01-01-01-01-02.mp4	VO	Speech	Neutral	Normal	Kids	R1	A2	2	1	1	1	1	1	2	1	0	0	1	1	0	1	0	1	1
02-01-01-01-01-01-03.mp4	VO	Speech	Neutral	Normal	Kids	R1	A3	2	1	1	1	1	1	3	1	1	0	0	0	0	1	0	1	1
02-01-01-01-01-01-04.mp4	VO	Speech	Neutral	Normal	Kids	R1	A4	2	1	1	1	1	1	4	1	1	1	1	1	0	0	1	1	1
02-01-01-01-01-01-05.mp4	VO	Speech	Neutral	Normal	Kids	R1	A5	2	1	1	1	1	1	5	1	1	1	0	1	1	1	1	1	1
02-01-01-01-01-01-06.mp4	VO	Speech	Neutral	Normal	Kids	R1	A6	2	1	1	1	1	1	6	0	0	0	1	1	1	1	1	0	1
02-01-01-01-01-01-07.mp4	VO	Speech	Neutral	Normal	Kids	R1	A7	2	1	1	1	1	1	7	1	1	1	1	1	1	1	0	1	1
02-01-01-01-01-01-08.mp4	VO	Speech	Neutral	Normal	Kids	R1	A8	2	1	1	1	1	1	8	1	1	0	1	1	1	1	1	1	1
02-01-01-01-01-01-09.mp4	VO	Speech	Neutral	Normal	Kids	R1	A9	2	1	1	1	1	1	9	0	1	0	1	1	1	0	1	1	1
02-01-01-01-01-01-10.mp4	VO	Speech	Neutral	Normal	Kids	R1	A10	2	1	1	1	1	1	10	1	1	0	1	0	1	1	1	1	0
02-01-01-01-01-01-11.mp4	VO	Speech	Neutral	Normal	Kids	R1	A11	2	1	1	1	1	1	11	1	1	1	1	1	1	1	1	1	1
02-01-01-01-01-01-12.mp4	VO	Speech	Neutral	Normal	Kids	R1	A12	2	1	1	1	1	1	12	1	1	1	1	1	1	1	1	1	1
02-01-01-01-01-01-13.mp4	VO	Speech	Neutral	Normal	Kids	R1	A13	2	1	1	1	1	1	13	0	1	1	1	1	1	0	0	1	1
02-01-01-01-01-01-14.mp4	VO	Speech	Neutral	Normal	Kids	R1	A14	2	1	1	1	1	1	14	1	1	1	0	1	1	1	1	0	1
02-01-01-01-01-01-15.mp4	VO	Speech	Neutral	Normal	Kids	R1	A15	2	1	1	1	1	1	15	1	1	1	1	1	1	1	1	1	1
02-01-01-01-01-01-16.mp4	VO	Speech	Neutral	Normal	Kids	R1	A16	2	1	1	1	1	1	16	0	1	0	1	0	0	0	1	0	0
02-01-01-01-01-01-17.mp4	VO	Speech	Neutral	Normal	Kids	R1	A17	2	1	1	1	1	1	17	1	1	0	1	1	1	0	1	1	1
02-01-01-01-01-01-18.mp4	VO	Speech	Neutral	Normal	Kids	R1	A18	2	1	1	1	1	1	18	1	1	0	1	1	1	1	0	1	1
02-01-01-01-01-01-19.mp4	VO	Speech	Neutral	Normal	Kids	R1	A19	2	1	1	1	1	1	19	1	1	1	0	1	1	1	1	1	1
02-01-01-01-01-01-20.mp4	VO	Speech	Neutral	Normal	Kids	R1	A20	2	1	1	1	1	1	20	1	1	0	1	1	1	1	1	1	1
02-01-01-01-01-01-21.mp4	VO	Speech	Neutral	Normal	Kids	R1	A21	2	1	1	1	1	1	21	1	1	1	0	0	0	1	1	1	1
02-01-01-01-01-01-22.mp4	VO	Speech	Neutral	Normal	Kids	R1	A22	2	1	1	1	1	1	22	1	1	1	1	1	1	1	0	0	0
02-01-01-01-01-01-23.mp4	VO	Speech	Neutral	Normal	Kids	R1	A23	2	1	1	1	1	1	23	0	0	1	1	1	1	1	1	1	1
02-01-01-01-01-01-24.mp4	VO	Speech	Neutral	Normal	Kids	R1	A24	2	1	1	1	1	1	24	1	1	1	1	1	1	1	1	1	1
02-01-01-01-01-02-01.mp4	VO	Speech	Neutral	Normal	Kids	R2	A1	2	1	1	1	1	2	1	1	1	1	1	1	1	1	1	1	1
02-01-01-01-01-02-02.mp4	VO	Speech	Neutral	Normal	Kids	R2	A2	2	1	1	1	1	2	2	1	1	0	1	1	1	1	1	0	1
02-01-01-01-01-02-03.mp4	VO	Speech	Neutral	Normal	Kids	R2	A3	2	1	1	1	1	2	3	0	1	0	0	0	1	0	0	1	1
02-01-01-01-01-02-04.mp4	VO	Speech	Neutral	Normal	Kids	R2	A4	2	1	1	1	1	2	4	1	0	1	1	1	1	0	1	1	1
02-01-01-01-01-02-05.mp4	VO	Speech	Neutral	Normal	Kids	R2	A5	2	1	1	1	1	2	5	1	1	1	1	1	0	1	1	1	1
02-01-01-01-01-02-06.mp4	VO	Speech	Neutral	Normal	Kids	R2	A6	2	1	1	1	1	2	6	1	1	1	1	1	1	1	1	1	1
02-01-01-01-01-02-07.mp4	VO	Speech	Neutral	Normal	Kids	R2	A7	2	1	1	1	1	2	7	1	1	1	1	1	0	1	1	1	1
02-01-01-01-01-02-08.mp4	VO	Speech	Neutral	Normal	Kids	R2	A8	2	1	1	1	1	2	8	1	0	1	1	1	1	1	1	1	1
02-01-01-01-01-02-09.mp4	VO	Speech	Neutral	Normal	Kids	R2	A9	2	1	1	1	1	2	9	1	1	0	1	1	1	1	0	1	0
02-01-01-01-01-02-10.mp4	VO	Speech	Neutral	Normal	Kids	R2	A10	2	1	1	1	1	2	10	1	0	1	1	0	1	1	1	0	0
02-01-01-01-01-02-11.mp4	VO	Speech	Neutral	Normal	Kids	R2	A11	2	1	1	1	1	2	11	1	1	1	1	1	1	1	1	1	1
02-01-01-01-01-02-12.mp4	VO	Speech	Neutral	Normal	Kids	R2	A12	2	1	1	1	1	2	12	1	1	1	1	1	1	1	1	1	1
02-01-01-01-01-02-13.mp4	VO	Speech	Neutral	Normal	Kids	R2	A13	2	1	1	1	1	2	13	1	1	1	1	1	1	1	1	1	1
02-01-01-01-01-02-14.mp4	VO	Speech	Neutral	Normal	Kids	R2	A14	2	1	1	1	1	2	14	0	0	1	0	1	0	0	1	0	0
02-01-01-01-01-02-15.mp4	VO	Speech	Neutral	Normal	Kids	R2	A15	2	1	1	1	1	2	15	1	1	1	1	1	0	1	1	1	0
02-01-01-01-01-02-16.mp4	VO	Speech	Neutral	Normal	Kids	R2	A16	2	1	1	1	1	2	16	0	1	0	1	0	0	1	0	1	0
02-01-01-01-01-02-17.mp4	VO	Speech	Neutral	Normal	Kids	R2	A17	2	1	1	1	1	2	17	0	1	0	1	1	1	1	0	1	1
02-01-01-01-01-02-18.mp4	VO	Speech	Neutral	Normal	Kids	R2	A18	2	1	1	1	1	2	18	1	1	1	1	1	1	1	1	1	1
02-01-01-01-01-02-19.mp4	VO	Speech	Neutral	Normal	Kids	R2	A19	2	1	1	1	1	2	19	1	1	1	1	0	0	1	1	1	1
02-01-01-01-01-02-20.mp4	VO	Speech	Neutral	Normal	Kids	R2	A20	2	1	1	1	1	2	20	1	1	1	1	1	1	1	1	1	0
02-01-01-01-01-02-21.mp4	VO	Speech	Neutral	Normal	Kids	R2	A21	2	1	1	1	1	2	21	1	1	1	1	1	0	1	1	1	1
02-01-01-01-01-02-22.mp4	VO	Speech	Neutral	Normal	Kids	R2	A22	2	1	1	1	1	2	22	1	1	1	1	1	1	1	1	1	1
02-01-01-01-01-02-23.mp4	VO	Speech	Neutral	Normal	Kids	R2	A23	2	1	1	1	1	2	23	1	1	1	1	1	1	1	1	1	1
02-01-01-01-01-02-24.mp4	VO	Speech	Neutral	Normal	Kids	R2	A24	2	1	1	1	1	2	24	1	1	1	1	0	0	0	1	1	1
02-01-01-01-02-01-01.mp4	VO	Speech	Neutral	Normal	Dogs	R1	A1	2	1	1	1	2	1	1	1	0	1	1	1	1	1	1	1	0
02-01-01-01-02-01-02.mp4	VO	Speech	Neutral	Normal	Dogs	R1	A2	2	1	1	1	2	1	2	1	1	1	1	1	1	1	0	1	1
02-01-01-01-02-01-03.mp4	VO	Speech	Neutral	Normal	Dogs	R1	A3	2	1	1	1	2	1	3	0	0	0	0	0	1	1	0	0	0
02-01-01-01-02-01-04.mp4	VO	Speech	Neutral	Normal	Dogs	R1	A4	2	1	1	1	2	1	4	1	1	0	0	1	0	1	1	1	1
02-01-01-01-02-01-05.mp4	VO	Speech	Neutral	Normal	Dogs	R1	A5	2	1	1	1	2	1	5	1	1	0	1	1	0	0	1	1	0
02-01-01-01-02-01-06.mp4	VO	Speech	Neutral	Normal	Dogs	R1	A6	2	1	1	1	2	1	6	1	1	0	1	1	1	0	1	1	1
02-01-01-01-02-01-07.mp4	VO	Speech	Neutral	Normal	Dogs	R1	A7	2	1	1	1	2	1	7	1	0	1	1	0	1	1	1	1	1
02-01-01-01-02-01-08.mp4	VO	Speech	Neutral	Normal	Dogs	R1	A8	2	1	1	1	2	1	8	1	1	1	1	1	1	1	1	1	0
02-01-01-01-02-01-09.mp4	VO	Speech	Neutral	Normal	Dogs	R1	A9	2	1	1	1	2	1	9	0	1	0	1	1	1	1	0	1	0
02-01-01-01-02-01-10.mp4	VO	Speech	Neutral	Normal	Dogs	R1	A10	2	1	1	1	2	1	10	1	1	1	0	1	1	1	1	1	1
02-01-01-01-02-01-11.mp4	VO	Speech	Neutral	Normal	Dogs	R1	A11	2	1	1	1	2	1	11	1	1	1	1	1	1	1	1	1	1
02-01-01-01-02-01-12.mp4	VO	Speech	Neutral	Normal	Dogs	R1	A12	2	1	1	1	2	1	12	1	1	1	1	1	1	1	0	1	1
02-01-01-01-02-01-13.mp4	VO	Speech	Neutral	Normal	Dogs	R1	A13	2	1	1	1	2	1	13	1	1	0	1	1	1	1	1	1	1
02-01-01-01-02-01-14.mp4	VO	Speech	Neutral	Normal	Dogs	R1	A14	2	1	1	1	2	1	14	1	0	1	1	1	1	1	1	0	0
02-01-01-01-02-01-15.mp4	VO	Speech	Neutral	Normal	Dogs	R1	A15	2	1	1	1	2	1	15	1	1	1	1	1	1	1	1	1	1
02-01-01-01-02-01-16.mp4	VO	Speech	Neutral	Normal	Dogs	R1	A16	2	1	1	1	2	1	16	1	1	1	1	1	0	0	1	1	1
02-01-01-01-02-01-17.mp4	VO	Speech	Neutral	Normal	Dogs	R1	A17	2	1	1	1	2	1	17	1	1	1	1	1	1	1	1	1	1
02-01-01-01-02-01-18.mp4	VO	Speech	Neutral	Normal	Dogs	R1	A18	2	1	1	1	2	1	18	1	1	0	1	1	1	1	1	1	0
02-01-01-01-02-01-19.mp4	VO	Speech	Neutral	Normal	Dogs	R1	A19	2	1	1	1	2	1	19	1	1	1	0	1	1	1	1	1	0
02-01-01-01-02-01-20.mp4	VO	Speech	Neutral	Normal	Dogs	R1	A20	2	1	1	1	2	1	20	1	1	0	1	1	1	0	0	1	1
02-01-01-01-02-01-21.mp4	VO	Speech	Neutral	Normal	Dogs	R1	A21	2	1	1	1	2	1	21	1	1	1	0	1	1	1	0	1	1
02-01-01-01-02-01-22.mp4	VO	Speech	Neutral	Normal	Dogs	R1	A22	2	1	1	1	2	1	22	1	1	1	1	1	1	1	1	1	1
02-01-01-01-02-01-23.mp4	VO	Speech	Neutral	Normal	Dogs	R1	A23	2	1	1	1	2	1	23	1	1	1	1	1	1	1	1	1	1
02-01-01-01-02-01-24.mp4	VO	Speech	Neutral	Normal	Dogs	R1	A24	2	1	1	1	2	1	24	1	0	1	0	1	1	1	0	0	1
02-01-01-01-02-02-01.mp4	VO	Speech	Neutral	Normal	Dogs	R2	A1	2	1	1	1	2	2	1	1	1	1	1	1	1	1	1	1	1
02-01-01-01-02-02-02.mp4	VO	Speech	Neutral	Normal	Dogs	R2	A2	2	1	1	1	2	2	2	1	1	1	1	1	1	1	1	1	1
02-01-01-01-02-02-03.mp4	VO	Speech	Neutral	Normal	Dogs	R2	A3	2	1	1	1	2	2	3	1	1	0	1	0	1	1	0	0	1
02-01-01-01-02-02-04.mp4	VO	Speech	Neutral	Normal	Dogs	R2	A4	2	1	1	1	2	2	4	1	1	1	1	1	1	0	1	1	1
02-01-01-01-02-02-05.mp4	VO	Speech	Neutral	Normal	Dogs	R2	A5	2	1	1	1	2	2	5	1	1	0	1	1	1	1	1	1	1
02-01-01-01-02-02-06.mp4	VO	Speech	Neutral	Normal	Dogs	R2	A6	2	1	1	1	2	2	6	1	1	1	1	1	1	1	0	1	1
02-01-01-01-02-02-07.mp4	VO	Speech	Neutral	Normal	Dogs	R2	A7	2	1	1	1	2	2	7	1	1	1	1	1	1	1	1	1	1
02-01-01-01-02-02-08.mp4	VO	Speech	Neutral	Normal	Dogs	R2	A8	2	1	1	1	2	2	8	1	1	0	1	1	1	1	1	1	1
02-01-01-01-02-02-09.mp4	VO	Speech	Neutral	Normal	Dogs	R2	A9	2	1	1	1	2	2	9	1	1	1	1	0	1	0	0	1	1
02-01-01-01-02-02-10.mp4	VO	Speech	Neutral	Normal	Dogs	R2	A10	2	1	1	1	2	2	10	1	0	1	1	0	1	1	0	0	0
02-01-01-01-02-02-11.mp4	VO	Speech	Neutral	Normal	Dogs	R2	A11	2	1	1	1	2	2	11	1	1	1	1	1	1	1	1	1	0
02-01-01-01-02-02-12.mp4	VO	Speech	Neutral	Normal	Dogs	R2	A12	2	1	1	1	2	2	12	0	0	0	0	1	1	1	1	1	0
02-01-01-01-02-02-13.mp4	VO	Speech	Neutral	Normal	Dogs	R2	A13	2	1	1	1	2	2	13	1	1	1	1	1	1	1	1	0	1
02-01-01-01-02-02-14.mp4	VO	Speech	Neutral	Normal	Dogs	R2	A14	2	1	1	1	2	2	14	1	1	1	1	1	1	1	1	1	1
02-01-01-01-02-02-15.mp4	VO	Speech	Neutral	Normal	Dogs	R2	A15	2	1	1	1	2	2	15	1	0	1	0	1	1	1	1	1	1
02-01-01-01-02-02-16.mp4	VO	Speech	Neutral	Normal	Dogs	R2	A16	2	1	1	1	2	2	16	1	1	0	0	1	1	0	0	1	1
02-01-01-01-02-02-17.mp4	VO	Speech	Neutral	Normal	Dogs	R2	A17	2	1	1	1	2	2	17	1	1	1	1	1	0	1	1	1	0
02-01-01-01-02-02-18.mp4	VO	Speech	Neutral	Normal	Dogs	R2	A18	2	1	1	1	2	2	18	1	1	1	1	1	1	0	1	0	1
02-01-01-01-02-02-19.mp4	VO	Speech	Neutral	Normal	Dogs	R2	A19	2	1	1	1	2	2	19	1	0	1	1	1	1	1	1	1	1
02-01-01-01-02-02-20.mp4	VO	Speech	Neutral	Normal	Dogs	R2	A20	2	1	1	1	2	2	20	1	1	1	0	1	0	1	1	1	1
02-01-01-01-02-02-21.mp4	VO	Speech	Neutral	Normal	Dogs	R2	A21	2	1	1	1	2	2	21	1	1	1	1	1	1	0	1	0	1
02-01-01-01-02-02-22.mp4	VO	Speech	Neutral	Normal	Dogs	R2	A22	2	1	1	1	2	2	22	1	1	1	1	1	1	1	1	1	1
02-01-01-01-02-02-23.mp4	VO	Speech	Neutral	Normal	Dogs	R2	A23	2	1	1	1	2	2	23	1	1	1	1	1	1	1	1	1	1
02-01-01-01-02-02-24.mp4	VO	Speech	Neutral	Normal	Dogs	R2	A24	2	1	1	1	2	2	24	1	0	1	0	1	1	1	0	1	1
02-01-02-01-01-01-01.mp4	VO	Speech	Calm	Normal	Kids	R1	A1	2	1	2	1	1	1	1	0	1	1	1	1	0	1	1	1	1
02-01-02-01-01-01-02.mp4	VO	Speech	Calm	Normal	Kids	R1	A2	2	1	2	1	1	1	2	1	0	1	1	1	1	1	0	0	1
02-01-02-01-01-01-03.mp4	VO	Speech	Calm	Normal	Kids	R1	A3	2	1	2	1	1	1	3	0	1	0	0	0	0	0	0	0	1
02-01-02-01-01-01-04.mp4	VO	Speech	Calm	Normal	Kids	R1	A4	2	1	2	1	1	1	4	0	0	0	0	0	0	0	0	0	0
02-01-02-01-01-01-05.mp4	VO	Speech	Calm	Normal	Kids	R1	A5	2	1	2	1	1	1	5	0	1	0	0	0	0	0	0	0	0
02-01-02-01-01-01-06.mp4	VO	Speech	Calm	Normal	Kids	R1	A6	2	1	2	1	1	1	6	1	0	1	1	0	1	1	1	1	1
02-01-02-01-01-01-07.mp4	VO	Speech	Calm	Normal	Kids	R1	A7	2	1	2	1	1	1	7	1	0	0	0	0	1	1	1	0	1
02-01-02-01-01-01-08.mp4	VO	Speech	Calm	Normal	Kids	R1	A8	2	1	2	1	1	1	8	0	1	0	0	1	1	0	0	1	1
02-01-02-01-01-01-09.mp4	VO	Speech	Calm	Normal	Kids	R1	A9	2	1	2	1	1	1	9	1	0	1	1	1	0	1	0	1	1
02-01-02-01-01-01-10.mp4	VO	Speech	Calm	Normal	Kids	R1	A10	2	1	2	1	1	1	10	1	0	0	1	0	1	0	1	1	1
02-01-02-01-01-01-11.mp4	VO	Speech	Calm	Normal	Kids	R1	A11	2	1	2	1	1	1	11	1	1	0	1	1	1	0	1	1	0
02-01-02-01-01-01-12.mp4	VO	Speech	Calm	Normal	Kids	R1	A12	2	1	2	1	1	1	12	1	1	1	1	1	1	1	1	1	0
02-01-02-01-01-01-13.mp4	VO	Speech	Calm	Normal	Kids	R1	A13	2	1	2	1	1	1	13	1	1	1	1	1	1	0	0	0	1
02-01-02-01-01-01-14.mp4	VO	Speech	Calm	Normal	Kids	R1	A14	2	1	2	1	1	1	14	0	1	1	1	0	0	1	0	1	1
02-01-02-01-01-01-15.mp4	VO	Speech	Calm	Normal	Kids	R1	A15	2	1	2	1	1	1	15	0	1	1	0	1	1	1	1	1	1
02-01-02-01-01-01-16.mp4	VO	Speech	Calm	Normal	Kids	R1	A16	2	1	2	1	1	1	16	0	0	0	0	0	0	0	0	1	1
02-01-02-01-01-01-17.mp4	VO	Speech	Calm	Normal	Kids	R1	A17	2	1	2	1	1	1	17	1	1	1	1	0	1	1	0	1	1
02-01-02-01-01-01-18.mp4	VO	Speech	Calm	Normal	Kids	R1	A18	2	1	2	1	1	1	18	0	1	0	1	1	0	1	1	1	0
02-01-02-01-01-01-19.mp4	VO	Speech	Calm	Normal	Kids	R1	A19	2	1	2	1	1	1	19	1	1	0	1	1	0	1	0	1	0
02-01-02-01-01-01-20.mp4	VO	Speech	Calm	Normal	Kids	R1	A20	2	1	2	1	1	1	20	1	1	1	1	0	1	1	0	1	1
02-01-02-01-01-01-21.mp4	VO	Speech	Calm	Normal	Kids	R1	A21	2	1	2	1	1	1	21	1	0	1	1	1	0	0	0	1	0
02-01-02-01-01-01-22.mp4	VO	Speech	Calm	Normal	Kids	R1	A22	2	1	2	1	1	1	22	1	1	1	1	1	1	1	1	1	0
02-01-02-01-01-01-23.mp4	VO	Speech	Calm	Normal	Kids	R1	A23	2	1	2	1	1	1	23	1	1	1	1	1	1	1	1	1	1
02-01-02-01-01-01-24.mp4	VO	Speech	Calm	Normal	Kids	R1	A24	2	1	2	1	1	1	24	0	0	1	1	1	0	1	0	1	1
02-01-02-01-01-02-01.mp4	VO	Speech	Calm	Normal	Kids	R2	A1	2	1	2	1	1	2	1	1	1	0	1	1	1	1	1	1	1
02-01-02-01-01-02-02.mp4	VO	Speech	Calm	Normal	Kids	R2	A2	2	1	2	1	1	2	2	1	1	0	1	1	1	1	1	1	1
02-01-02-01-01-02-03.mp4	VO	Speech	Calm	Normal	Kids	R2	A3	2	1	2	1	1	2	3	0	1	0	0	1	0	0	0	0	0
02-01-02-01-01-02-04.mp4	VO	Speech	Calm	Normal	Kids	R2	A4	2	1	2	1	1	2	4	1	1	1	0	0	1	0	0	1	0
02-01-02-01-01-02-05.mp4	VO	Speech	Calm	Normal	Kids	R2	A5	2	1	2	1	1	2	5	1	1	1	1	0	1	0	1	1	1
02-01-02-01-01-02-06.mp4	VO	Speech	Calm	Normal	Kids	R2	A6	2	1	2	1	1	2	6	1	1	1	0	0	1	1	1	1	1
02-01-02-01-01-02-07.mp4	VO	Speech	Calm	Normal	Kids	R2	A7	2	1	2	1	1	2	7	1	1	1	0	0	1	1	1	0	0
02-01-02-01-01-02-08.mp4	VO	Speech	Calm	Normal	Kids	R2	A8	2	1	2	1	1	2	8	1	0	0	1	1	0	0	0	1	1
02-01-02-01-01-02-09.mp4	VO	Speech	Calm	Normal	Kids	R2	A9	2	1	2	1	1	2	9	1	1	1	1	0	1	0	1	1	1
02-01-02-01-01-02-10.mp4	VO	Speech	Calm	Normal	Kids	R2	A10	2	1	2	1	1	2	10	1	1	1	0	0	0	0	0	0	0
02-01-02-01-01-02-11.mp4	VO	Speech	Calm	Normal	Kids	R2	A11	2	1	2	1	1	2	11	0	1	0	0	0	1	0	0	0	0
02-01-02-01-01-02-12.mp4	VO	Speech	Calm	Normal	Kids	R2	A12	2	1	2	1	1	2	12	1	1	1	1	1	1	1	1	1	1
02-01-02-01-01-02-13.mp4	VO	Speech	Calm	Normal	Kids	R2	A13	2	1	2	1	1	2	13	1	1	1	1	0	1	1	0	1	1
02-01-02-01-01-02-14.mp4	VO	Speech	Calm	Normal	Kids	R2	A14	2	1	2	1	1	2	14	0	1	1	1	1	1	0	1	0	1
02-01-02-01-01-02-15.mp4	VO	Speech	Calm	Normal	Kids	R2	A15	2	1	2	1	1	2	15	0	1	0	1	1	0	1	1	1	1
02-01-02-01-01-02-16.mp4	VO	Speech	Calm	Normal	Kids	R2	A16	2	1	2	1	1	2	16	0	0	0	1	0	1	0	1	0	1
02-01-02-01-01-02-17.mp4	VO	Speech	Calm	Normal	Kids	R2	A17	2	1	2	1	1	2	17	1	1	1	1	1	1	1	1	1	1
02-01-02-01-01-02-18.mp4	VO	Speech	Calm	Normal	Kids	R2	A18	2	1	2	1	1	2	18	0	0	0	0	0	0	0	1	0	0
02-01-02-01-01-02-19.mp4	VO	Speech	Calm	Normal	Kids	R2	A19	2	1	2	1	1	2	19	0	1	0	0	0	1	0	0	1	0
02-01-02-01-01-02-20.mp4	VO	Speech	Calm	Normal	Kids	R2	A20	2	1	2	1	1	2	20	0	0	0	1	1	0	1	0	1	0
02-01-02-01-01-02-21.mp4	VO	Speech	Calm	Normal	Kids	R2	A21	2	1	2	1	1	2	21	1	1	0	0	1	0	1	0	1	1
02-01-02-01-01-02-22.mp4	VO	Speech	Calm	Normal	Kids	R2	A22	2	1	2	1	1	2	22	1	1	1	1	1	1	1	1	1	0
02-01-02-01-01-02-23.mp4	VO	Speech	Calm	Normal	Kids	R2	A23	2	1	2	1	1	2	23	1	1	1	1	1	1	1	0	1	1
02-01-02-01-01-02-24.mp4	VO	Speech	Calm	Normal	Kids	R2	A24	2	1	2	1	1	2	24	0	0	0	0	1	1	1	1	0	0
02-01-02-01-02-01-01.mp4	VO	Speech	Calm	Normal	Dogs	R1	A1	2	1	2	1	2	1	1	0	1	1	1	1	1	0	1	1	1
02-01-02-01-02-01-02.mp4	VO	Speech	Calm	Normal	Dogs	R1	A2	2	1	2	1	2	1	2	0	1	1	1	1	1	1	1	0	0
02-01-02-01-02-01-03.mp4	VO	Speech	Calm	Normal	Dogs	R1	A3	2	1	2	1	2	1	3	1	0	0	0	0	0	0	0	0	0
02-01-02-01-02-01-04.mp4	VO	Speech	Calm	Normal	Dogs	R1	A4	2	1	2	1	2	1	4	0	0	0	0	0	0	1	0	0	1
02-01-02-01-02-01-05.mp4	VO	Speech	Calm	Normal	Dogs	R1	A5	2	1	2	1	2	1	5	0	1	0	0	0	1	0	0	0	0
02-01-02-01-02-01-06.mp4	VO	Speech	Calm	Normal	Dogs	R1	A6	2	1	2	1	2	1	6	1	1	1	1	1	0	1	0	1	1
02-01-02-01-02-01-07.mp4	VO	Speech	Calm	Normal	Dogs	R1	A7	2	1	2	1	2	1	7	1	1	1	1	1	1	1	1	0	0
02-01-02-01-02-01-08.mp4	VO	Speech	Calm	Normal	Dogs	R1	A8	2	1	2	1	2	1	8	1	0	0	1	1	1	1	1	1	0
02-01-02-01-02-01-09.mp4	VO	Speech	Calm	Normal	Dogs	R1	A9	2	1	2	1	2	1	9	1	1	0	1	1	1	1	1	0	1
02-01-02-01-02-01-10.mp4	VO	Speech	Calm	Normal	Dogs	R1	A10	2	1	2	1	2	1	10	0	0	1	0	1	0	0	0	0	0
02-01-02-01-02-01-11.mp4	VO	Speech	Calm	Normal	Dogs	R1	A11	2	1	2	1	2	1	11	1	1	1	0	0	0	1	0	1	1
02-01-02-01-02-01-12.mp4	VO	Speech	Calm	Normal	Dogs	R1	A12	2	1	2	1	2	1	12	0	0	1	1	1	1	1	0	1	1
02-01-02-01-02-01-13.mp4	VO	Speech	Calm	Normal	Dogs	R1	A13	2	1	2	1	2	1	13	0	1	1	0	0	1	0	1	0	1
02-01-02-01-02-01-14.mp4	VO	Speech	Calm	Normal	Dogs	R1	A14	2	1	2	1	2	1	14	1	1	1	1	0	1	1	1	1	0
02-01-02-01-02-01-15.mp4	VO	Speech	Calm	Normal	Dogs	R1	A15	2	1	2	1	2	1	15	1	1	1	1	1	1	1	1	1	1
02-01-02-01-02-01-16.mp4	VO	Speech	Calm	Normal	Dogs	R1	A16	2	1	2	1	2	1	16	1	1	0	0	1	0	1	0	1	0
02-01-02-01-02-01-17.mp4	VO	Speech	Calm	Normal	Dogs	R1	A17	2	1	2	1	2	1	17	1	1	1	1	0	1	1	0	1	1
02-01-02-01-02-01-18.mp4	VO	Speech	Calm	Normal	Dogs	R1	A18	2	1	2	1	2	1	18	0	0	0	1	0	1	1	1	0	0
02-01-02-01-02-01-19.mp4	VO	Speech	Calm	Normal	Dogs	R1	A19	2	1	2	1	2	1	19	1	0	0	0	0	1	1	1	0	1
02-01-02-01-02-01-20.mp4	VO	Speech	Calm	Normal	Dogs	R1	A20	2	1	2	1	2	1	20	1	1	1	1	1	1	0	0	1	0
02-01-02-01-02-01-21.mp4	VO	Speech	Calm	Normal	Dogs	R1	A21	2	1	2	1	2	1	21	0	1	1	0	0	1	1	0	1	1
02-01-02-01-02-01-22.mp4	VO	Speech	Calm	Normal	Dogs	R1	A22	2	1	2	1	2	1	22	1	1	1	1	0	0	0	0	0	1
02-01-02-01-02-01-23.mp4	VO	Speech	Calm	Normal	Dogs	R1	A23	2	1	2	1	2	1	23	1	1	1	1	1	1	0	1	1	1
02-01-02-01-02-01-24.mp4	VO	Speech	Calm	Normal	Dogs	R1	A24	2	1	2	1	2	1	24	1	1	1	1	1	1	1	1	1	1
02-01-02-01-02-02-01.mp4	VO	Speech	Calm	Normal	Dogs	R2	A1	2	1	2	1	2	2	1	1	1	0	1	1	0	1	1	0	1
02-01-02-01-02-02-02.mp4	VO	Speech	Calm	Normal	Dogs	R2	A2	2	1	2	1	2	2	2	1	1	1	1	1	1	1	1	1	0
02-01-02-01-02-02-03.mp4	VO	Speech	Calm	Normal	Dogs	R2	A3	2	1	2	1	2	2	3	0	0	0	1	0	1	0	0	1	0
02-01-02-01-02-02-04.mp4	VO	Speech	Calm	Normal	Dogs	R2	A4	2	1	2	1	2	2	4	1	0	0	1	1	1	0	0	1	0
02-01-02-01-02-02-05.mp4	VO	Speech	Calm	Normal	Dogs	R2	A5	2	1	2	1	2	2	5	0	0	0	1	0	0	0	1	0	0
02-01-02-01-02-02-06.mp4	VO	Speech	Calm	Normal	Dogs	R2	A6	2	1	2	1	2	2	6	1	1	1	0	1	1	1	1	1	1
02-01-02-01-02-02-07.mp4	VO	Speech	Calm	Normal	Dogs	R2	A7	2	1	2	1	2	2	7	0	1	0	1	1	1	1	1	1	0
02-01-02-01-02-02-08.mp4	VO	Speech	Calm	Normal	Dogs	R2	A8	2	1	2	1	2	2	8	0	1	0	0	1	0	0	1	0	0
02-01-02-01-02-02-09.mp4	VO	Speech	Calm	Normal	Dogs	R2	A9	2	1	2	1	2	2	9	1	1	0	1	1	0	0	1	1	1
02-01-02-01-02-02-10.mp4	VO	Speech	Calm	Normal	Dogs	R2	A10	2	1	2	1	2	2	10	0	0	1	0	1	0	1	1	1	0
02-01-02-01-02-02-11.mp4	VO	Speech	Calm	Normal	Dogs	R2	A11	2	1	2	1	2	2	11	1	1	1	0	1	1	1	1	1	1
02-01-02-01-02-02-12.mp4	VO	Speech	Calm	Normal	Dogs	R2	A12	2	1	2	1	2	2	12	1	1	1	1	1	1	1	1	1	1
02-01-02-01-02-02-13.mp4	VO	Speech	Calm	Normal	Dogs	R2	A13	2	1	2	1	2	2	13	1	1	1	0	0	1	0	1	1	1
02-01-02-01-02-02-14.mp4	VO	Speech	Calm	Normal	Dogs	R2	A14	2	1	2	1	2	2	14	0	0	1	1	1	1	1	1	0	0
02-01-02-01-02-02-15.mp4	VO	Speech	Calm	Normal	Dogs	R2	A15	2	1	2	1	2	2	15	1	1	1	1	1	1	1	1	1	1
02-01-02-01-02-02-16.mp4	VO	Speech	Calm	Normal	Dogs	R2	A16	2	1	2	1	2	2	16	0	0	0	1	1	0	0	1	1	1
02-01-02-01-02-02-17.mp4	VO	Speech	Calm	Normal	Dogs	R2	A17	2	1	2	1	2	2	17	1	1	1	1	1	1	1	1	1	1
02-01-02-01-02-02-18.mp4	VO	Speech	Calm	Normal	Dogs	R2	A18	2	1	2	1	2	2	18	1	0	0	1	0	1	1	0	0	0
02-01-02-01-02-02-19.mp4	VO	Speech	Calm	Normal	Dogs	R2	A19	2	1	2	1	2	2	19	0	1	0	0	0	0	1	0	0	0
02-01-02-01-02-02-20.mp4	VO	Speech	Calm	Normal	Dogs	R2	A20	2	1	2	1	2	2	20	1	1	1	1	1	1	1	1	1	1
02-01-02-01-02-02-21.mp4	VO	Speech	Calm	Normal	Dogs	R2	A21	2	1	2	1	2	2	21	0	0	0	1	0	0	1	1	0	1
02-01-02-01-02-02-22.mp4	VO	Speech	Calm	Normal	Dogs	R2	A22	2	1	2	1	2	2	22	0	0	0	1	0	1	0	1	0	1
02-01-02-01-02-02-23.mp4	VO	Speech	Calm	Normal	Dogs	R2	A23	2	1	2	1	2	2	23	1	1	1	1	1	1	1	1	1	1
02-01-02-01-02-02-24.mp4	VO	Speech	Calm	Normal	Dogs	R2	A24	2	1	2	1	2	2	24	0	0	0	0	0	1	0	1	0	0
02-01-02-02-01-01-01.mp4	VO	Speech	Calm	Strong	Kids	R1	A1	2	1	2	2	1	1	1	1	1	1	1	1	0	1	0	1	0
02-01-02-02-01-01-02.mp4	VO	Speech	Calm	Strong	Kids	R1	A2	2	1	2	2	1	1	2	1	1	1	1	0	0	1	1	1	0
02-01-02-02-01-01-03.mp4	VO	Speech	Calm	Strong	Kids	R1	A3	2	1	2	2	1	1	3	0	1	0	0	0	0	1	0	1	1
02-01-02-02-01-01-04.mp4	VO	Speech	Calm	Strong	Kids	R1	A4	2	1	2	2	1	1	4	0	1	1	1	1	0	1	1	1	1
02-01-02-02-01-01-05.mp4	VO	Speech	Calm	Strong	Kids	R1	A5	2	1	2	2	1	1	5	0	0	1	0	0	0	0	0	1	0
02-01-02-02-01-01-06.mp4	VO	Speech	Calm	Strong	Kids	R1	A6	2	1	2	2	1	1	6	1	1	1	1	1	1	0	1	1	0
02-01-02-02-01-01-07.mp4	VO	Speech	Calm	Strong	Kids	R1	A7	2	1	2	2	1	1	7	1	1	1	1	0	1	1	1	1	0
02-01-02-02-01-01-08.mp4	VO	Speech	Calm	Strong	Kids	R1	A8	2	1	2	2	1	1	8	1	0	1	0	1	0	1	1	0	0
02-01-02-02-01-01-09.mp4	VO	Speech	Calm	Strong	Kids	R1	A9	2	1	2	2	1	1	9	1	1	1	1	1	0	1	0	1	1
02-01-02-02-01-01-10.mp4	VO	Speech	Calm	Strong	Kids	R1	A10	2	1	2	2	1	1	10	1	1	0	1	1	0	1	1	0	1
02-01-02-02-01-01-11.mp4	VO	Speech	Calm	Strong	Kids	R1	A11	2	1	2	2	1	1	11	1	1	0	1	1	1	1	1	1	1
02-01-02-02-01-01-12.mp4	VO	Speech	Calm	Strong	Kids	R1	A12	2	1	2	2	1	1	12	1	0	1	1	0	1	1	1	1	1
02-01-02-02-01-01-13.mp4	VO	Speech	Calm	Strong	Kids	R1	A13	2	1	2	2	1	1	13	1	0	1	0	0	0	0	1	0	1
02-01-02-02-01-01-14.mp4	VO	Speech	Calm	Strong	Kids	R1	A14	2	1	2	2	1	1	14	1	0	1	1	1	1	1	1	1	1
02-01-02-02-01-01-15.mp4	VO	Speech	Calm	Strong	Kids	R1	A15	2	1	2	2	1	1	15	1	1	0	1	1	1	1	0	1	1
02-01-02-02-01-01-16.mp4	VO	Speech	Calm	Strong	Kids	R1	A16	2	1	2	2	1	1	16	1	1	0	0	0	0	0	0	0	0
02-01-02-02-01-01-17.mp4	VO	Speech	Calm	Strong	Kids	R1	A17	2	1	2	2	1	1	17	1	1	0	1	1	1	0	0	1	0
02-01-02-02-01-01-18.mp4	VO	Speech	Calm	Strong	Kids	R1	A18	2	1	2	2	1	1	18	1	0	0	1	1	0	0	1	0	0
02-01-02-02-01-01-19.mp4	VO	Speech	Calm	Strong	Kids	R1	A19	2	1	2	2	1	1	19	1	0	1	0	0	0	0	0	0	1
02-01-02-02-01-01-20.mp4	VO	Speech	Calm	Strong	Kids	R1	A20	2	1	2	2	1	1	20	0	0	0	1	1	0	1	1	1	0
02-01-02-02-01-01-21.mp4	VO	Speech	Calm	Strong	Kids	R1	A21	2	1	2	2	1	1	21	1	0	1	0	0	1	0	1	0	1
02-01-02-02-01-01-22.mp4	VO	Speech	Calm	Strong	Kids	R1	A22	2	1	2	2	1	1	22	0	0	1	0	0	1	0	0	1	1
02-01-02-02-01-01-23.mp4	VO	Speech	Calm	Strong	Kids	R1	A23	2	1	2	2	1	1	23	1	1	1	1	1	1	1	0	1	1
02-01-02-02-01-01-24.mp4	VO	Speech	Calm	Strong	Kids	R1	A24	2	1	2	2	1	1	24	0	0	0	0	0	0	1	1	1	1
02-01-02-02-01-02-01.mp4	VO	Speech	Calm	Strong	Kids	R2	A1	2	1	2	2	1	2	1	0	0	1	1	1	1	1	1	1	1
02-01-02-02-01-02-02.mp4	VO	Speech	Calm	Strong	Kids	R2	A2	2	1	2	2	1	2	2	1	1	1	1	0	1	1	1	1	0
02-01-02-02-01-02-03.mp4	VO	Speech	Calm	Strong	Kids	R2	A3	2	1	2	2	1	2	3	0	0	0	0	0	0	0	0	0	0
02-01-02-02-01-02-04.mp4	VO	Speech	Calm	Strong	Kids	R2	A4	2	1	2	2	1	2	4	1	0	1	0	0	0	0	0	1	1
02-01-02-02-01-02-05.mp4	VO	Speech	Calm	Strong	Kids	R2	A5	2	1	2	2	1	2	5	1	0	1	1	1	0	0	0	0	1
02-01-02-02-01-02-06.mp4	VO	Speech	Calm	Strong	Kids	R2	A6	2	1	2	2	1	2	6	1	1	1	0	1	1	0	1	0	1
02-01-02-02-01-02-07.mp4	VO	Speech	Calm	Strong	Kids	R2	A7	2	1	2	2	1	2	7	1	1	1	0	1	1	1	1	1	1
02-01-02-02-01-02-08.mp4	VO	Speech	Calm	Strong	Kids	R2	A8	2	1	2	2	1	2	8	1	0	0	1	1	1	0	0	1	1
02-01-02-02-01-02-09.mp4	VO	Speech	Calm	Strong	Kids	R2	A9	2	1	2	2	1	2	9	0	1	1	1	0	1	1	1	0	1
02-01-02-02-01-02-10.mp4	VO	Speech	Calm	Strong	Kids	R2	A10	2	1	2	2	1	2	10	0	1	1	1	1	0	1	1	1	1
02-01-02-02-01-02-11.mp4	VO	Speech	Calm	Strong	Kids	R2	A11	2	1	2	2	1	2	11	0	1	1	0	0	1	1	1	0	0
02-01-02-02-01-02-12.mp4	VO	Speech	Calm	Strong	Kids	R2	A12	2	1	2	2	1	2	12	1	0	1	1	0	0	1	1	0	0
02-01-02-02-01-02-13.mp4	VO	Speech	Calm	Strong	Kids	R2	A13	2	1	2	2	1	2	13	0	1	1	0	1	1	1	1	0	1
02-01-02-02-01-02-14.mp4	VO	Speech	Calm	Strong	Kids	R2	A14	2	1	2	2	1	2	14	0	1	1	1	0	1	0	1	1	1
02-01-02-02-01-02-15.mp4	VO	Speech	Calm	Strong	Kids	R2	A15	2	1	2	2	1	2	15	1	1	0	0	1	0	1	1	1	1
02-01-02-02-01-02-16.mp4	VO	Speech	Calm	Strong	Kids	R2	A16	2	1	2	2	1	2	16	0	0	0	1	0	0	0	0	1	1
02-01-02-02-01-02-17.mp4	VO	Speech	Calm	Strong	Kids	R2	A17	2	1	2	2	1	2	17	0	1	1	1	1	0	1	1	1	1
02-01-02-02-01-02-18.mp4	VO	Speech	Calm	Strong	Kids	R2	A18	2	1	2	2	1	2	18	0	1	0	1	1	1	0	1	1	1
02-01-02-02-01-02-19.mp4	VO	Speech	Calm	Strong	Kids	R2	A19	2	1	2	2	1	2	19	0	0	1	0	0	0	0	1	0	0
02-01-02-02-01-02-20.mp4	VO	Speech	Calm	Strong	Kids	R2	A20	2	1	2	2	1	2	20	0	0	0	1	1	1	1	1	1	0
02-01-02-02-01-02-21.mp4	VO	Speech	Calm	Strong	Kids	R2	A21	2	1	2	2	1	2	21	1	0	1	1	0	0	1	1	0	0
02-01-02-02-01-02-22.mp4	VO	Speech	Calm	Strong	Kids	R2	A22	2	1	2	2	1	2	22	0	0	0	1	1	1	1	1	0	0
02-01-02-02-01-02-23.mp4	VO	Speech	Calm	Strong	Kids	R2	A23	2	1	2	2	1	2	23	1	1	1	1	1	1	1	1	1	1
02-01-02-02-01-02-24.mp4	VO	Speech	Calm	Strong	Kids	R2	A24	2	1	2	2	1	2	24	1	1	0	1	1	1	1	1	1	0
02-01-02-02-02-01-01.mp4	VO	Speech	Calm	Strong	Dogs	R1	A1	2	1	2	2	2	1	1	0	0	0	0	0	0	1	1	1	1
02-01-02-02-02-01-02.mp4	VO	Speech	Calm	Strong	Dogs	R1	A2	2	1	2	2	2	1	2	0	1	0	1	1	1	1	0	1	1
02-01-02-02-02-01-03.mp4	VO	Speech	Calm	Strong	Dogs	R1	A3	2	1	2	2	2	1	3	0	0	0	0	0	0	0	0	0	0
02-01-02-02-02-01-04.mp4	VO	Speech	Calm	Strong	Dogs	R1	A4	2	1	2	2	2	1	4	0	0	0	0	0	1	1	0	0	0
02-01-02-02-02-01-05.mp4	VO	Speech	Calm	Strong	Dogs	R1	A5	2	1	2	2	2	1	5	0	1	0	0	1	1	0	0	1	1
02-01-02-02-02-01-06.mp4	VO	Speech	Calm	Strong	Dogs	R1	A6	2	1	2	2	2	1	6	1	1	1	1	1	1	1	0	0	1
02-01-02-02-02-01-07.mp4	VO	Speech	Calm	Strong	Dogs	R1	A7	2	1	2	2	2	1	7	0	1	1	0	0	1	0	1	0	1
02-01-02-02-02-01-08.mp4	VO	Speech	Calm	Strong	Dogs	R1	A8	2	1	2	2	2	1	8	1	0	0	0	1	0	1	1	0	0
02-01-02-02-02-01-09.mp4	VO	Speech	Calm	Strong	Dogs	R1	A9	2	1	2	2	2	1	9	1	1	1	1	1	1	1	1	1	1
02-01-02-02-02-01-10.mp4	VO	Speech	Calm	Strong	Dogs	R1	A10	2	1	2	2	2	1	10	1	0	0	0	0	1	0	1	0	1
02-01-02-02-02-01-11.mp4	VO	Speech	Calm	Strong	Dogs	R1	A11	2	1	2	2	2	1	11	1	1	1	1	1	1	1	1	0	1
02-01-02-02-02-01-12.mp4	VO	Speech	Calm	Strong	Dogs	R1	A12	2	1	2	2	2	1	12	1	0	1	1	1	1	0	1	1	1
02-01-02-02-02-01-13.mp4	VO	Speech	Calm	Strong	Dogs	R1	A13	2	1	2	2	2	1	13	1	0	1	1	1	1	1	1	1	1
02-01-02-02-02-01-14.mp4	VO	Speech	Calm	Strong	Dogs	R1	A14	2	1	2	2	2	1	14	1	0	1	1	0	0	1	0	1	0
02-01-02-02-02-01-15.mp4	VO	Speech	Calm	Strong	Dogs	R1	A15	2	1	2	2	2	1	15	1	1	1	0	0	1	1	1	1	1
02-01-02-02-02-01-16.mp4	VO	Speech	Calm	Strong	Dogs	R1	A16	2	1	2	2	2	1	16	0	0	0	0	0	0	1	1	0	1
02-01-02-02-02-01-17.mp4	VO	Speech	Calm	Strong	Dogs	R1	A17	2	1	2	2	2	1	17	1	1	0	1	1	1	0	1	0	1
02-01-02-02-02-01-18.mp4	VO	Speech	Calm	Strong	Dogs	R1	A18	2	1	2	2	2	1	18	1	0	0	0	0	0	0	1	0	1
02-01-02-02-02-01-19.mp4	VO	Speech	Calm	Strong	Dogs	R1	A19	2	1	2	2	2	1	19	0	0	1	0	0	1	0	1	1	0
02-01-02-02-02-01-20.mp4	VO	Speech	Calm	Strong	Dogs	R1	A20	2	1	2	2	2	1	20	0	0	1	0	1	0	0	0	1	0
02-01-02-02-02-01-21.mp4	VO	Speech	Calm	Strong	Dogs	R1	A21	2	1	2	2	2	1	21	0	0	0	0	1	0	0	0	0	0
02-01-02-02-02-01-22.mp4	VO	Speech	Calm	Strong	Dogs	R1	A22	2	1	2	2	2	1	22	0	1	0	1	1	0	0	1	1	1
02-01-02-02-02-01-23.mp4	VO	Speech	Calm	Strong	Dogs	R1	A23	2	1	2	2	2	1	23	1	1	1	1	1	1	1	1	1	1
02-01-02-02-02-01-24.mp4	VO	Speech	Calm	Strong	Dogs	R1	A24	2	1	2	2	2	1	24	1	0	0	0	1	0	0	1	0	0
02-01-02-02-02-02-01.mp4	VO	Speech	Calm	Strong	Dogs	R2	A1	2	1	2	2	2	2	1	1	0	1	1	0	0	1	1	0	1
02-01-02-02-02-02-02.mp4	VO	Speech	Calm	Strong	Dogs	R2	A2	2	1	2	2	2	2	2	1	0	0	1	1	1	0	0	1	1
02-01-02-02-02-02-03.mp4	VO	Speech	Calm	Strong	Dogs	R2	A3	2	1	2	2	2	2	3	0	0	0	0	1	0	1	0	0	0
02-01-02-02-02-02-04.mp4	VO	Speech	Calm	Strong	Dogs	R2	A4	2	1	2	2	2	2	4	0	0	0	0	0	1	1	0	0	0
02-01-02-02-02-02-05.mp4	VO	Speech	Calm	Strong	Dogs	R2	A5	2	1	2	2	2	2	5	0	1	1	0	1	0	1	0	1	1
02-01-02-02-02-02-06.mp4	VO	Speech	Calm	Strong	Dogs	R2	A6	2	1	2	2	2	2	6	1	1	1	1	1	1	1	1	0	1
02-01-02-02-02-02-07.mp4	VO	Speech	Calm	Strong	Dogs	R2	A7	2	1	2	2	2	2	7	1	0	0	1	1	1	1	1	0	0
02-01-02-02-02-02-08.mp4	VO	Speech	Calm	Strong	Dogs	R2	A8	2	1	2	2	2	2	8	0	1	1	1	1	1	0	1	1	1
02-01-02-02-02-02-09.mp4	VO	Speech	Calm	Strong	Dogs	R2	A9	2	1	2	2	2	2	9	0	1	0	1	1	1	1	1	1	1
02-01-02-02-02-02-10.mp4	VO	Speech	Calm	Strong	Dogs	R2	A10	2	1	2	2	2	2	10	0	1	0	0	0	1	1	1	0	1
02-01-02-02-02-02-11.mp4	VO	Speech	Calm	Strong	Dogs	R2	A11	2	1	2	2	2	2	11	0	1	1	1	0	1	1	0	1	1
02-01-02-02-02-02-12.mp4	VO	Speech	Calm	Strong	Dogs	R2	A12	2	1	2	2	2	2	12	0	1	1	1	0	1	1	0	1	0
02-01-02-02-02-02-13.mp4	VO	Speech	Calm	Strong	Dogs	R2	A13	2	1	2	2	2	2	13	1	0	1	1	1	1	1	1	1	1
02-01-02-02-02-02-14.mp4	VO	Speech	Calm	Strong	Dogs	R2	A14	2	1	2	2	2	2	14	0	1	1	1	1	0	1	1	1	0
02-01-02-02-02-02-15.mp4	VO	Speech	Calm	Strong	Dogs	R2	A15	2	1	2	2	2	2	15	1	1	1	1	1	1	1	1	1	1
02-01-02-02-02-02-16.mp4	VO	Speech	Calm	Strong	Dogs	R2	A16	2	1	2	2	2	2	16	0	0	1	0	1	0	0	0	1	1
02-01-02-02-02-02-17.mp4	VO	Speech	Calm	Strong	Dogs	R2	A17	2	1	2	2	2	2	17	0	1	0	1	0	1	1	1	1	0
02-01-02-02-02-02-18.mp4	VO	Speech	Calm	Strong	Dogs	R2	A18	2	1	2	2	2	2	18	1	0	0	1	1	1	0	0	1	0
02-01-02-02-02-02-19.mp4	VO	Speech	Calm	Strong	Dogs	R2	A19	2	1	2	2	2	2	19	0	0	0	1	1	0	0	1	0	0
02-01-02-02-02-02-20.mp4	VO	Speech	Calm	Strong	Dogs	R2	A20	2	1	2	2	2	2	20	1	1	1	1	1	1	1	1	1	0
02-01-02-02-02-02-21.mp4	VO	Speech	Calm	Strong	Dogs	R2	A21	2	1	2	2	2	2	21	0	0	0	0	1	0	0	1	0	1
02-01-02-02-02-02-22.mp4	VO	Speech	Calm	Strong	Dogs	R2	A22	2	1	2	2	2	2	22	0	0	1	0	0	1	0	1	1	0
02-01-02-02-02-02-23.mp4	VO	Speech	Calm	Strong	Dogs	R2	A23	2	1	2	2	2	2	23	1	0	1	1	1	1	1	1	1	1
02-01-02-02-02-02-24.mp4	VO	Speech	Calm	Strong	Dogs	R2	A24	2	1	2	2	2	2	24	1	0	0	0	0	0	0	0	1	0
02-01-03-01-01-01-01.mp4	VO	Speech	Happy	Normal	Kids	R1	A1	2	1	3	1	1	1	1	1	1	1	1	1	1	0	1	1	1
02-01-03-01-01-01-02.mp4	VO	Speech	Happy	Normal	Kids	R1	A2	2	1	3	1	1	1	2	1	1	0	1	1	1	1	1	1	1
02-01-03-01-01-01-03.mp4	VO	Speech	Happy	Normal	Kids	R1	A3	2	1	3	1	1	1	3	0	0	0	1	0	0	0	0	1	0
02-01-03-01-01-01-04.mp4	VO	Speech	Happy	Normal	Kids	R1	A4	2	1	3	1	1	1	4	1	1	0	1	1	1	0	0	1	1
02-01-03-01-01-01-05.mp4	VO	Speech	Happy	Normal	Kids	R1	A5	2	1	3	1	1	1	5	1	1	1	1	1	1	1	1	1	0
02-01-03-01-01-01-06.mp4	VO	Speech	Happy	Normal	Kids	R1	A6	2	1	3	1	1	1	6	1	1	1	1	1	1	1	1	1	1
02-01-03-01-01-01-07.mp4	VO	Speech	Happy	Normal	Kids	R1	A7	2	1	3	1	1	1	7	1	1	1	1	1	1	1	0	1	1
02-01-03-01-01-01-08.mp4	VO	Speech	Happy	Normal	Kids	R1	A8	2	1	3	1	1	1	8	1	1	1	1	1	1	1	1	1	0
02-01-03-01-01-01-09.mp4	VO	Speech	Happy	Normal	Kids	R1	A9	2	1	3	1	1	1	9	1	1	1	1	1	1	0	1	1	1
02-01-03-01-01-01-10.mp4	VO	Speech	Happy	Normal	Kids	R1	A10	2	1	3	1	1	1	10	1	1	1	1	1	1	1	1	1	1
02-01-03-01-01-01-11.mp4	VO	Speech	Happy	Normal	Kids	R1	A11	2	1	3	1	1	1	11	0	1	1	0	1	1	0	0	1	0
02-01-03-01-01-01-12.mp4	VO	Speech	Happy	Normal	Kids	R1	A12	2	1	3	1	1	1	12	1	1	1	1	0	1	1	1	1	1
02-01-03-01-01-01-13.mp4	VO	Speech	Happy	Normal	Kids	R1	A13	2	1	3	1	1	1	13	1	1	1	1	1	1	1	0	1	1
02-01-03-01-01-01-14.mp4	VO	Speech	Happy	Normal	Kids	R1	A14	2	1	3	1	1	1	14	1	1	1	0	1	1	1	1	1	1
02-01-03-01-01-01-15.mp4	VO	Speech	Happy	Normal	Kids	R1	A15	2	1	3	1	1	1	15	1	1	1	1	1	0	1	1	1	1
02-01-03-01-01-01-16.mp4	VO	Speech	Happy	Normal	Kids	R1	A16	2	1	3	1	1	1	16	1	1	1	0	1	0	1	1	1	1
02-01-03-01-01-01-17.mp4	VO	Speech	Happy	Normal	Kids	R1	A17	2	1	3	1	1	1	17	1	1	1	1	1	1	1	1	1	0
02-01-03-01-01-01-18.mp4	VO	Speech	Happy	Normal	Kids	R1	A18	2	1	3	1	1	1	18	1	1	1	1	0	1	1	1	1	1
02-01-03-01-01-01-19.mp4	VO	Speech	Happy	Normal	Kids	R1	A19	2	1	3	1	1	1	19	1	1	0	1	1	0	1	1	1	1
02-01-03-01-01-01-20.mp4	VO	Speech	Happy	Normal	Kids	R1	A20	2	1	3	1	1	1	20	1	1	1	1	1	0	1	1	1	1
02-01-03-01-01-01-21.mp4	VO	Speech	Happy	Normal	Kids	R1	A21	2	1	3	1	1	1	21	1	1	0	1	1	1	1	1	1	1
02-01-03-01-01-01-22.mp4	VO	Speech	Happy	Normal	Kids	R1	A22	2	1	3	1	1	1	22	1	1	1	1	1	1	1	1	0	1
02-01-03-01-01-01-23.mp4	VO	Speech	Happy	Normal	Kids	R1	A23	2	1	3	1	1	1	23	0	0	0	0	1	0	1	0	0	1
02-01-03-01-01-01-24.mp4	VO	Speech	Happy	Normal	Kids	R1	A24	2	1	3	1	1	1	24	1	1	1	1	1	1	1	1	1	1
02-01-03-01-01-02-01.mp4	VO	Speech	Happy	Normal	Kids	R2	A1	2	1	3	1	1	2	1	1	1	1	1	1	1	1	1	0	1
02-01-03-01-01-02-02.mp4	VO	Speech	Happy	Normal	Kids	R2	A2	2	1	3	1	1	2	2	0	0	1	1	1	1	0	0	1	1
02-01-03-01-01-02-03.mp4	VO	Speech	Happy	Normal	Kids	R2	A3	2	1	3	1	1	2	3	1	1	1	1	1	1	0	0	0	0
02-01-03-01-01-02-04.mp4	VO	Speech	Happy	Normal	Kids	R2	A4	2	1	3	1	1	2	4	1	1	1	1	1	1	1	1	1	1
02-01-03-01-01-02-05.mp4	VO	Speech	Happy	Normal	Kids	R2	A5	2	1	3	1	1	2	5	1	1	1	1	0	1	1	0	1	1
02-01-03-01-01-02-06.mp4	VO	Speech	Happy	Normal	Kids	R2	A6	2	1	3	1	1	2	6	1	1	1	1	1	1	1	1	1	1
02-01-03-01-01-02-07.mp4	VO	Speech	Happy	Normal	Kids	R2	A7	2	1	3	1	1	2	7	1	1	1	1	1	1	1	1	1	1
02-01-03-01-01-02-08.mp4	VO	Speech	Happy	Normal	Kids	R2	A8	2	1	3	1	1	2	8	1	1	1	1	1	1	1	1	1	1
02-01-03-01-01-02-09.mp4	VO	Speech	Happy	Normal	Kids	R2	A9	2	1	3	1	1	2	9	0	1	1	1	1	1	1	1	1	1
02-01-03-01-01-02-10.mp4	VO	Speech	Happy	Normal	Kids	R2	A10	2	1	3	1	1	2	10	1	1	0	1	1	1	1	1	1	1
02-01-03-01-01-02-11.mp4	VO	Speech	Happy	Normal	Kids	R2	A11	2	1	3	1	1	2	11	1	1	0	1	1	0	0	1	1	1
02-01-03-01-01-02-12.mp4	VO	Speech	Happy	Normal	Kids	R2	A12	2	1	3	1	1	2	12	1	1	1	1	1	1	1	1	1	0
02-01-03-01-01-02-13.mp4	VO	Speech	Happy	Normal	Kids	R2	A13	2	1	3	1	1	2	13	0	1	0	1	1	1	1	1	1	1
02-01-03-01-01-02-14.mp4	VO	Speech	Happy	Normal	Kids	R2	A14	2	1	3	1	1	2	14	1	1	1	1	1	1	1	1	1	1
02-01-03-01-01-02-15.mp4	VO	Speech	Happy	Normal	Kids	R2	A15	2	1	3	1	1	2	15	1	0	0	1	0	0	1	0	1	0
02-01-03-01-01-02-16.mp4	VO	Speech	Happy	Normal	Kids	R2	A16	2	1	3	1	1	2	16	1	1	1	1	1	1	1	1	1	1
02-01-03-01-01-02-17.mp4	VO	Speech	Happy	Normal	Kids	R2	A17	2	1	3	1	1	2	17	0	1	1	1	0	0	1	1	0	1
02-01-03-01-01-02-18.mp4	VO	Speech	Happy	Normal	Kids	R2	A18	2	1	3	1	1	2	18	1	1	1	0	1	1	1	1	0	1
02-01-03-01-01-02-19.mp4	VO	Speech	Happy	Normal	Kids	R2	A19	2	1	3	1	1	2	19	1	1	1	1	1	0	1	1	1	1
02-01-03-01-01-02-20.mp4	VO	Speech	Happy	Normal	Kids	R2	A20	2	1	3	1	1	2	20	1	0	1	1	1	0	1	0	1	1
02-01-03-01-01-02-21.mp4	VO	Speech	Happy	Normal	Kids	R2	A21	2	1	3	1	1	2	21	1	1	1	1	1	1	1	0	1	1
02-01-03-01-01-02-22.mp4	VO	Speech	Happy	Normal	Kids	R2	A22	2	1	3	1	1	2	22	1	0	1	1	1	1	1	1	1	1
02-01-03-01-01-02-23.mp4	VO	Speech	Happy	Normal	Kids	R2	A23	2	1	3	1	1	2	23	1	0	1	1	0	1	1	1	0	1
02-01-03-01-01-02-24.mp4	VO	Speech	Happy	Normal	Kids	R2	A24	2	1	3	1	1	2	24	1	1	1	1	1	1	1	1	1	1
02-01-03-01-02-01-01.mp4	VO	Speech	Happy	Normal	Dogs	R1	A1	2	1	3	1	2	1	1	1	1	1	1	1	1	1	1	1	1
02-01-03-01-02-01-02.mp4	VO	Speech	Happy	Normal	Dogs	R1	A2	2	1	3	1	2	1	2	1	0	1	1	1	1	1	1	0	1
02-01-03-01-02-01-03.mp4	VO	Speech	Happy	Normal	Dogs	R1	A3	2	1	3	1	2	1	3	1	0	0	1	0	1	1	1	0	0
02-01-03-01-02-01-04.mp4	VO	Speech	Happy	Normal	Dogs	R1	A4	2	1	3	1	2	1	4	1	1	1	1	1	1	1	1	1	1
02-01-03-01-02-01-05.mp4	VO	Speech	Happy	Normal	Dogs	R1	A5	2	1	3	1	2	1	5	1	1	1	1	1	1	0	1	1	1
02-01-03-01-02-01-06.mp4	VO	Speech	Happy	Normal	Dogs	R1	A6	2	1	3	1	2	1	6	1	1	1	1	1	1	1	1	1	1
02-01-03-01-02-01-07.mp4	VO	Speech	Happy	Normal	Dogs	R1	A7	2	1	3	1	2	1	7	1	1	1	1	1	1	1	1	1	0
02-01-03-01-02-01-08.mp4	VO	Speech	Happy	Normal	Dogs	R1	A8	2	1	3	1	2	1	8	1	1	1	1	1	1	1	1	1	1
02-01-03-01-02-01-09.mp4	VO	Speech	Happy	Normal	Dogs	R1	A9	2	1	3	1	2	1	9	1	1	0	1	1	1	1	0	1	1
02-01-03-01-02-01-10.mp4	VO	Speech	Happy	Normal	Dogs	R1	A10	2	1	3	1	2	1	10	1	1	1	1	1	1	0	1	1	1
02-01-03-01-02-01-11.mp4	VO	Speech	Happy	Normal	Dogs	R1	A11	2	1	3	1	2	1	11	1	1	1	1	1	0	0	1	1	0
02-01-03-01-02-01-12.mp4	VO	Speech	Happy	Normal	Dogs	R1	A12	2	1	3	1	2	1	12	1	1	1	1	1	1	1	1	1	1
02-01-03-01-02-01-13.mp4	VO	Speech	Happy	Normal	Dogs	R1	A13	2	1	3	1	2	1	13	1	1	1	1	1	1	1	1	1	1
02-01-03-01-02-01-14.mp4	VO	Speech	Happy	Normal	Dogs	R1	A14	2	1	3	1	2	1	14	1	1	1	1	1	1	1	1	1	1
02-01-03-01-02-01-15.mp4	VO	Speech	Happy	Normal	Dogs	R1	A15	2	1	3	1	2	1	15	1	1	1	1	0	1	0	1	1	1
02-01-03-01-02-01-16.mp4	VO	Speech	Happy	Normal	Dogs	R1	A16	2	1	3	1	2	1	16	1	1	1	1	1	1	1	1	1	1
02-01-03-01-02-01-17.mp4	VO	Speech	Happy	Normal	Dogs	R1	A17	2	1	3	1	2	1	17	1	1	1	1	1	0	0	1	1	1
02-01-03-01-02-01-18.mp4	VO	Speech	Happy	Normal	Dogs	R1	A18	2	1	3	1	2	1	18	1	1	1	1	1	1	1	1	1	1
02-01-03-01-02-01-19.mp4	VO	Speech	Happy	Normal	Dogs	R1	A19	2	1	3	1	2	1	19	1	1	1	1	0	1	1	1	0	1
02-01-03-01-02-01-20.mp4	VO	Speech	Happy	Normal	Dogs	R1	A20	2	1	3	1	2	1	20	1	1	1	1	1	1	1	1	1	1
02-01-03-01-02-01-21.mp4	VO	Speech	Happy	Normal	Dogs	R1	A21	2	1	3	1	2	1	21	1	1	1	1	1	1	1	1	1	1
02-01-03-01-02-01-22.mp4	VO	Speech	Happy	Normal	Dogs	R1	A22	2	1	3	1	2	1	22	1	1	1	1	1	0	1	0	0	1
02-01-03-01-02-01-23.mp4	VO	Speech	Happy	Normal	Dogs	R1	A23	2	1	3	1	2	1	23	1	1	1	0	0	1	0	1	1	1
02-01-03-01-02-01-24.mp4	VO	Speech	Happy	Normal	Dogs	R1	A24	2	1	3	1	2	1	24	1	1	1	1	1	1	1	1	1	1
02-01-03-01-02-02-01.mp4	VO	Speech	Happy	Normal	Dogs	R2	A1	2	1	3	1	2	2	1	1	1	1	1	1	1	0	1	1	0
02-01-03-01-02-02-02.mp4	VO	Speech	Happy	Normal	Dogs	R2	A2	2	1	3	1	2	2	2	0	0	1	1	0	1	1	0	1	1
02-01-03-01-02-02-03.mp4	VO	Speech	Happy	Normal	Dogs	R2	A3	2	1	3	1	2	2	3	1	1	1	0	0	0	0	0	1	0
02-01-03-01-02-02-04.mp4	VO	Speech	Happy	Normal	Dogs	R2	A4	2	1	3	1	2	2	4	1	1	1	0	1	1	1	1	1	1
02-01-03-01-02-02-05.mp4	VO	Speech	Happy	Normal	Dogs	R2	A5	2	1	3	1	2	2	5	1	1	1	1	1	1	1	1	0	1
02-01-03-01-02-02-06.mp4	VO	Speech	Happy	Normal	Dogs	R2	A6	2	1	3	1	2	2	6	0	1	1	1	1	1	1	1	1	1
02-01-03-01-02-02-07.mp4	VO	Speech	Happy	Normal	Dogs	R2	A7	2	1	3	1	2	2	7	1	1	1	1	1	1	1	1	1	1
02-01-03-01-02-02-08.mp4	VO	Speech	Happy	Normal	Dogs	R2	A8	2	1	3	1	2	2	8	1	1	1	1	1	1	1	1	1	1
02-01-03-01-02-02-09.mp4	VO	Speech	Happy	Normal	Dogs	R2	A9	2	1	3	1	2	2	9	0	1	1	1	0	1	1	1	1	1
02-01-03-01-02-02-10.mp4	VO	Speech	Happy	Normal	Dogs	R2	A10	2	1	3	1	2	2	10	1	1	1	1	1	1	1	0	1	1
02-01-03-01-02-02-11.mp4	VO	Speech	Happy	Normal	Dogs	R2	A11	2	1	3	1	2	2	11	1	0	1	1	1	1	0	0	1	0
02-01-03-01-02-02-12.mp4	VO	Speech	Happy	Normal	Dogs	R2	A12	2	1	3	1	2	2	12	1	1	1	1	1	1	1	1	1	1
02-01-03-01-02-02-13.mp4	VO	Speech	Happy	Normal	Dogs	R2	A13	2	1	3	1	2	2	13	1	1	1	1	1	1	1	1	1	1
02-01-03-01-02-02-14.mp4	VO	Speech	Happy	Normal	Dogs	R2	A14	2	1	3	1	2	2	14	1	1	1	1	1	0	1	1	1	1
02-01-03-01-02-02-15.mp4	VO	Speech	Happy	Normal	Dogs	R2	A15	2	1	3	1	2	2	15	1	1	1	1	1	1	0	1	1	0
02-01-03-01-02-02-16.mp4	VO	Speech	Happy	Normal	Dogs	R2	A16	2	1	3	1	2	2	16	1	1	1	1	1	1	1	1	1	1
02-01-03-01-02-02-17.mp4	VO	Speech	Happy	Normal	Dogs	R2	A17	2	1	3	1	2	2	17	1	0	0	1	0	1	1	1	1	1
02-01-03-01-02-02-18.mp4	VO	Speech	Happy	Normal	Dogs	R2	A18	2	1	3	1	2	2	18	1	1	1	1	1	1	1	1	1	1
02-01-03-01-02-02-19.mp4	VO	Speech	Happy	Normal	Dogs	R2	A19	2	1	3	1	2	2	19	1	1	1	1	1	0	1	1	0	1
02-01-03-01-02-02-20.mp4	VO	Speech	Happy	Normal	Dogs	R2	A20	2	1	3	1	2	2	20	1	1	1	1	1	1	1	1	0	1
02-01-03-01-02-02-21.mp4	VO	Speech	Happy	Normal	Dogs	R2	A21	2	1	3	1	2	2	21	1	1	1	1	1	1	1	1	1	1
02-01-03-01-02-02-22.mp4	VO	Speech	Happy	Normal	Dogs	R2	A22	2	1	3	1	2	2	22	1	1	0	1	1	0	1	1	1	1
02-01-03-01-02-02-23.mp4	VO	Speech	Happy	Normal	Dogs	R2	A23	2	1	3	1	2	2	23	1	1	1	1	1	1	1	1	1	1
02-01-03-01-02-02-24.mp4	VO	Speech	Happy	Normal	Dogs	R2	A24	2	1	3	1	2	2	24	1	1	1	1	1	1	1	1	1	1
02-01-03-02-01-01-01.mp4	VO	Speech	Happy	Strong	Kids	R1	A1	2	1	3	2	1	1	1	1	1	1	1	1	1	1	1	1	1
02-01-03-02-01-01-02.mp4	VO	Speech	Happy	Strong	Kids	R1	A2	2	1	3	2	1	1	2	1	1	1	1	1	1	1	1	1	1
02-01-03-02-01-01-03.mp4	VO	Speech	Happy	Strong	Kids	R1	A3	2	1	3	2	1	1	3	1	0	0	1	1	0	0	1	0	1
02-01-03-02-01-01-04.mp4	VO	Speech	Happy	Strong	Kids	R1	A4	2	1	3	2	1	1	4	1	1	1	1	1	1	1	1	1	1
02-01-03-02-01-01-05.mp4	VO	Speech	Happy	Strong	Kids	R1	A5	2	1	3	2	1	1	5	1	1	1	0	1	1	1	1	1	1
02-01-03-02-01-01-06.mp4	VO	Speech	Happy	Strong	Kids	R1	A6	2	1	3	2	1	1	6	1	1	1	1	1	1	1	0	1	1
02-01-03-02-01-01-07.mp4	VO	Speech	Happy	Strong	Kids	R1	A7	2	1	3	2	1	1	7	1	1	1	0	1	0	1	1	0	1
02-01-03-02-01-01-08.mp4	VO	Speech	Happy	Strong	Kids	R1	A8	2	1	3	2	1	1	8	1	1	1	1	1	1	1	1	1	1
02-01-03-02-01-01-09.mp4	VO	Speech	Happy	Strong	Kids	R1	A9	2	1	3	2	1	1	9	1	1	1	1	1	1	1	1	1	1
02-01-03-02-01-01-10.mp4	VO	Speech	Happy	Strong	Kids	R1	A10	2	1	3	2	1	1	10	1	1	1	1	1	1	1	0	1	1
02-01-03-02-01-01-11.mp4	VO	Speech	Happy	Strong	Kids	R1	A11	2	1	3	2	1	1	11	1	1	1	1	1	0	1	1	1	1
02-01-03-02-01-01-12.mp4	VO	Speech	Happy	Strong	Kids	R1	A12	2	1	3	2	1	1	12	1	1	1	1	1	1	1	1	1	1
02-01-03-02-01-01-13.mp4	VO	Speech	Happy	Strong	Kids	R1	A13	2	1	3	2	1	1	13	1	1	1	1	1	1	1	1	1	1
02-01-03-02-01-01-14.mp4	VO	Speech	Happy	Strong	Kids	R1	A14	2	1	3	2	1	1	14	1	1	1	1	1	1	0	1	1	1
02-01-03-02-01-01-15.mp4	VO	Speech	Happy	Strong	Kids	R1	A15	2	1	3	2	1	1	15	1	1	1	1	0	1	1	1	1	1
02-01-03-02-01-01-16.mp4	VO	Speech	Happy	Strong	Kids	R1	A16	2	1	3	2	1	1	16	1	1	1	1	1	1	1	0	1	1
02-01-03-02-01-01-17.mp4	VO	Speech	Happy	Strong	Kids	R1	A17	2	1	3	2	1	1	17	0	0	1	1	1	1	1	1	0	0
02-01-03-02-01-01-18.mp4	VO	Speech	Happy	Strong	Kids	R1	A18	2	1	3	2	1	1	18	1	1	1	1	1	1	1	1	1	1
02-01-03-02-01-01-19.mp4	VO	Speech	Happy	Strong	Kids	R1	A19	2	1	3	2	1	1	19	1	1	1	1	1	1	1	1	1	1
02-01-03-02-01-01-20.mp4	VO	Speech	Happy	Strong	Kids	R1	A20	2	1	3	2	1	1	20	1	1	0	1	1	1	1	1	1	1
02-01-03-02-01-01-21.mp4	VO	Speech	Happy	Strong	Kids	R1	A21	2	1	3	2	1	1	21	1	1	1	1	1	1	0	1	1	1
02-01-03-02-01-01-22.mp4	VO	Speech	Happy	Strong	Kids	R1	A22	2	1	3	2	1	1	22	1	1	1	1	1	1	1	1	1	1
02-01-03-02-01-01-23.mp4	VO	Speech	Happy	Strong	Kids	R1	A23	2	1	3	2	1	1	23	1	0	0	1	1	0	0	1	1	1
02-01-03-02-01-01-24.mp4	VO	Speech	Happy	Strong	Kids	R1	A24	2	1	3	2	1	1	24	1	1	1	1	1	0	1	1	0	1
02-01-03-02-01-02-01.mp4	VO	Speech	Happy	Strong	Kids	R2	A1	2	1	3	2	1	2	1	1	1	1	1	1	1	1	1	1	1
02-01-03-02-01-02-02.mp4	VO	Speech	Happy	Strong	Kids	R2	A2	2	1	3	2	1	2	2	1	1	1	1	1	1	1	1	1	1
02-01-03-02-01-02-03.mp4	VO	Speech	Happy	Strong	Kids	R2	A3	2	1	3	2	1	2	3	0	0	0	1	0	0	1	1	1	0
02-01-03-02-01-02-04.mp4	VO	Speech	Happy	Strong	Kids	R2	A4	2	1	3	2	1	2	4	1	1	0	1	1	1	1	0	1	0
02-01-03-02-01-02-05.mp4	VO	Speech	Happy	Strong	Kids	R2	A5	2	1	3	2	1	2	5	1	1	0	1	1	1	1	1	1	1
02-01-03-02-01-02-06.mp4	VO	Speech	Happy	Strong	Kids	R2	A6	2	1	3	2	1	2	6	1	1	1	1	1	1	1	0	1	1
02-01-03-02-01-02-07.mp4	VO	Speech	Happy	Strong	Kids	R2	A7	2	1	3	2	1	2	7	1	0	0	0	1	1	1	1	1	1
02-01-03-02-01-02-08.mp4	VO	Speech	Happy	Strong	Kids	R2	A8	2	1	3	2	1	2	8	1	1	1	1	1	1	1	1	1	1
02-01-03-02-01-02-09.mp4	VO	Speech	Happy	Strong	Kids	R2	A9	2	1	3	2	1	2	9	1	1	1	1	1	1	1	1	1	1
02-01-03-02-01-02-10.mp4	VO	Speech	Happy	Strong	Kids	R2	A10	2	1	3	2	1	2	10	1	1	1	1	1	1	1	1	1	1
02-01-03-02-01-02-11.mp4	VO	Speech	Happy	Strong	Kids	R2	A11	2	1	3	2	1	2	11	0	1	1	1	1	1	1	1	1	1
02-01-03-02-01-02-12.mp4	VO	Speech	Happy	Strong	Kids	R2	A12	2	1	3	2	1	2	12	1	1	1	0	1	1	1	1	1	1
02-01-03-02-01-02-13.mp4	VO	Speech	Happy	Strong	Kids	R2	A13	2	1	3	2	1	2	13	1	1	1	1	1	1	1	1	1	1
02-01-03-02-01-02-14.mp4	VO	Speech	Happy	Strong	Kids	R2	A14	2	1	3	2	1	2	14	1	0	1	1	1	1	1	1	1	1
02-01-03-02-01-02-15.mp4	VO	Speech	Happy	Strong	Kids	R2	A15	2	1	3	2	1	2	15	1	1	1	1	1	1	1	1	1	1
02-01-03-02-01-02-16.mp4	VO	Speech	Happy	Strong	Kids	R2	A16	2	1	3	2	1	2	16	1	1	1	1	1	1	1	1	1	1
02-01-03-02-01-02-17.mp4	VO	Speech	Happy	Strong	Kids	R2	A17	2	1	3	2	1	2	17	0	1	1	1	1	1	1	1	1	1
02-01-03-02-01-02-18.mp4	VO	Speech	Happy	Strong	Kids	R2	A18	2	1	3	2	1	2	18	1	1	1	1	1	1	0	1	1	1
02-01-03-02-01-02-19.mp4	VO	Speech	Happy	Strong	Kids	R2	A19	2	1	3	2	1	2	19	1	1	1	1	1	1	1	1	1	1
02-01-03-02-01-02-20.mp4	VO	Speech	Happy	Strong	Kids	R2	A20	2	1	3	2	1	2	20	1	1	1	1	1	1	1	1	1	1
02-01-03-02-01-02-21.mp4	VO	Speech	Happy	Strong	Kids	R2	A21	2	1	3	2	1	2	21	1	1	1	1	1	1	1	1	1	1
02-01-03-02-01-02-22.mp4	VO	Speech	Happy	Strong	Kids	R2	A22	2	1	3	2	1	2	22	1	1	1	1	1	1	0	1	1	1
02-01-03-02-01-02-23.mp4	VO	Speech	Happy	Strong	Kids	R2	A23	2	1	3	2	1	2	23	1	1	1	1	1	1	0	1	0	1
02-01-03-02-01-02-24.mp4	VO	Speech	Happy	Strong	Kids	R2	A24	2	1	3	2	1	2	24	1	1	1	1	1	1	1	1	1	1
02-01-03-02-02-01-01.mp4	VO	Speech	Happy	Strong	Dogs	R1	A1	2	1	3	2	2	1	1	1	1	1	1	1	1	1	1	1	1
02-01-03-02-02-01-02.mp4	VO	Speech	Happy	Strong	Dogs	R1	A2	2	1	3	2	2	1	2	1	1	1	1	1	1	1	1	0	0
02-01-03-02-02-01-03.mp4	VO	Speech	Happy	Strong	Dogs	R1	A3	2	1	3	2	2	1	3	1	0	0	0	0	1	0	1	1	0
02-01-03-02-02-01-04.mp4	VO	Speech	Happy	Strong	Dogs	R1	A4	2	1	3	2	2	1	4	0	0	1	1	1	1	1	1	1	1
02-01-03-02-02-01-05.mp4	VO	Speech	Happy	Strong	Dogs	R1	A5	2	1	3	2	2	1	5	1	1	1	1	1	1	1	1	0	1
02-01-03-02-02-01-06.mp4	VO	Speech	Happy	Strong	Dogs	R1	A6	2	1	3	2	2	1	6	1	1	1	1	1	1	1	1	1	1
02-01-03-02-02-01-07.mp4	VO	Speech	Happy	Strong	Dogs	R1	A7	2	1	3	2	2	1	7	1	1	1	0	1	1	1	1	1	0
02-01-03-02-02-01-08.mp4	VO	Speech	Happy	Strong	Dogs	R1	A8	2	1	3	2	2	1	8	1	1	1	1	1	1	1	1	1	1
02-01-03-02-02-01-09.mp4	VO	Speech	Happy	Strong	Dogs	R1	A9	2	1	3	2	2	1	9	1	1	1	0	1	1	1	1	0	1
02-01-03-02-02-01-10.mp4	VO	Speech	Happy	Strong	Dogs	R1	A10	2	1	3	2	2	1	10	1	1	1	1	1	1	1	1	1	1
02-01-03-02-02-01-11.mp4	VO	Speech	Happy	Strong	Dogs	R1	A11	2	1	3	2	2	1	11	1	1	1	1	1	1	1	0	1	1
02-01-03-02-02-01-12.mp4	VO	Speech	Happy	Strong	Dogs	R1	A12	2	1	3	2	2	1	12	1	1	1	1	1	1	1	1	1	1
02-01-03-02-02-01-13.mp4	VO	Speech	Happy	Strong	Dogs	R1	A13	2	1	3	2	2	1	13	1	1	1	1	1	1	1	1	1	1
02-01-03-02-02-01-14.mp4	VO	Speech	Happy	Strong	Dogs	R1	A14	2	1	3	2	2	1	14	1	1	1	1	1	1	1	0	1	1
02-01-03-02-02-01-15.mp4	VO	Speech	Happy	Strong	Dogs	R1	A15	2	1	3	2	2	1	15	0	1	1	1	1	1	1	1	1	1
02-01-03-02-02-01-16.mp4	VO	Speech	Happy	Strong	Dogs	R1	A16	2	1	3	2	2	1	16	1	1	1	1	1	1	1	0	1	1
02-01-03-02-02-01-17.mp4	VO	Speech	Happy	Strong	Dogs	R1	A17	2	1	3	2	2	1	17	1	1	0	1	1	0	0	1	1	1
02-01-03-02-02-01-18.mp4	VO	Speech	Happy	Strong	Dogs	R1	A18	2	1	3	2	2	1	18	1	1	1	1	1	1	1	1	1	1
02-01-03-02-02-01-19.mp4	VO	Speech	Happy	Strong	Dogs	R1	A19	2	1	3	2	2	1	19	1	1	1	1	1	1	1	1	1	1
02-01-03-02-02-01-20.mp4	VO	Speech	Happy	Strong	Dogs	R1	A20	2	1	3	2	2	1	20	0	0	1	1	1	0	0	1	1	0
02-01-03-02-02-01-21.mp4	VO	Speech	Happy	Strong	Dogs	R1	A21	2	1	3	2	2	1	21	1	1	1	1	1	1	1	1	1	1
02-01-03-02-02-01-22.mp4	VO	Speech	Happy	Strong	Dogs	R1	A22	2	1	3	2	2	1	22	1	0	1	1	0	1	1	1	1	1
02-01-03-02-02-01-23.mp4	VO	Speech	Happy	Strong	Dogs	R1	A23	2	1	3	2	2	1	23	1	0	0	1	0	0	0	1	0	0
02-01-03-02-02-01-24.mp4	VO	Speech	Happy	Strong	Dogs	R1	A24	2	1	3	2	2	1	24	1	1	1	1	1	1	1	1	0	1
02-01-03-02-02-02-01.mp4	VO	Speech	Happy	Strong	Dogs	R2	A1	2	1	3	2	2	2	1	1	1	1	1	1	1	0	1	1	1
02-01-03-02-02-02-02.mp4	VO	Speech	Happy	Strong	Dogs	R2	A2	2	1	3	2	2	2	2	1	1	1	1	1	1	1	1	1	1
02-01-03-02-02-02-03.mp4	VO	Speech	Happy	Strong	Dogs	R2	A3	2	1	3	2	2	2	3	1	1	1	1	0	1	1	1	1	1
02-01-03-02-02-02-04.mp4	VO	Speech	Happy	Strong	Dogs	R2	A4	2	1	3	2	2	2	4	1	1	1	1	1	1	1	1	1	0
02-01-03-02-02-02-05.mp4	VO	Speech	Happy	Strong	Dogs	R2	A5	2	1	3	2	2	2	5	1	1	1	1	1	1	1	1	1	0
02-01-03-02-02-02-06.mp4	VO	Speech	Happy	Strong	Dogs	R2	A6	2	1	3	2	2	2	6	1	1	1	1	1	1	1	1	1	1
02-01-03-02-02-02-07.mp4	VO	Speech	Happy	Strong	Dogs	R2	A7	2	1	3	2	2	2	7	1	1	1	1	0	0	1	1	1	1
02-01-03-02-02-02-08.mp4	VO	Speech	Happy	Strong	Dogs	R2	A8	2	1	3	2	2	2	8	1	1	0	1	1	1	1	1	1	1
02-01-03-02-02-02-09.mp4	VO	Speech	Happy	Strong	Dogs	R2	A9	2	1	3	2	2	2	9	1	1	1	1	1	1	1	1	1	0
02-01-03-02-02-02-10.mp4	VO	Speech	Happy	Strong	Dogs	R2	A10	2	1	3	2	2	2	10	1	1	1	1	1	1	1	1	0	1
02-01-03-02-02-02-11.mp4	VO	Speech	Happy	Strong	Dogs	R2	A11	2	1	3	2	2	2	11	1	1	1	1	1	1	1	1	1	1
02-01-03-02-02-02-12.mp4	VO	Speech	Happy	Strong	Dogs	R2	A12	2	1	3	2	2	2	12	1	1	1	1	1	1	1	1	1	1
02-01-03-02-02-02-13.mp4	VO	Speech	Happy	Strong	Dogs	R2	A13	2	1	3	2	2	2	13	0	1	1	1	1	0	1	1	1	1
02-01-03-02-02-02-14.mp4	VO	Speech	Happy	Strong	Dogs	R2	A14	2	1	3	2	2	2	14	0	1	1	1	1	1	1	1	1	1
02-01-03-02-02-02-15.mp4	VO	Speech	Happy	Strong	Dogs	R2	A15	2	1	3	2	2	2	15	1	1	1	1	1	1	1	1	1	1
02-01-03-02-02-02-16.mp4	VO	Speech	Happy	Strong	Dogs	R2	A16	2	1	3	2	2	2	16	1	1	1	1	1	1	1	1	1	1
02-01-03-02-02-02-17.mp4	VO	Speech	Happy	Strong	Dogs	R2	A17	2	1	3	2	2	2	17	1	1	1	0	1	1	0	1	1	1
02-01-03-02-02-02-18.mp4	VO	Speech	Happy	Strong	Dogs	R2	A18	2	1	3	2	2	2	18	1	1	1	1	1	1	1	1	0	1
02-01-03-02-02-02-19.mp4	VO	Speech	Happy	Strong	Dogs	R2	A19	2	1	3	2	2	2	19	1	1	1	1	1	1	0	1	1	1
02-01-03-02-02-02-20.mp4	VO	Speech	Happy	Strong	Dogs	R2	A20	2	1	3	2	2	2	20	1	1	1	1	1	1	1	1	1	1
02-01-03-02-02-02-21.mp4	VO	Speech	Happy	Strong	Dogs	R2	A21	2	1	3	2	2	2	21	1	1	1	1	1	1	1	1	1	1
02-01-03-02-02-02-22.mp4	VO	Speech	Happy	Strong	Dogs	R2	A22	2	1	3	2	2	2	22	1	1	1	1	1	1	1	1	1	1
02-01-03-02-02-02-23.mp4	VO	Speech	Happy	Strong	Dogs	R2	A23	2	1	3	2	2	2	23	1	1	1	0	0	1	0	1	1	0
02-01-03-02-02-02-24.mp4	VO	Speech	Happy	Strong	Dogs	R2	A24	2	1	3	2	2	2	24	1	1	1	1	1	1	0	1	1	1
02-01-04-01-01-01-01.mp4	VO	Speech	Sad	Normal	Kids	R1	A1	2	1	4	1	1	1	1	0	1	1	1	1	1	0	1	0	1
02-01-04-01-01-01-02.mp4	VO	Speech	Sad	Normal	Kids	R1	A2	2	1	4	1	1	1	2	1	1	1	1	0	0	1	1	0	0
02-01-04-01-01-01-03.mp4	VO	Speech	Sad	Normal	Kids	R1	A3	2	1	4	1	1	1	3	1	1	1	1	1	1	1	1	1	1
02-01-04-01-01-01-04.mp4	VO	Speech	Sad	Normal	Kids	R1	A4	2	1	4	1	1	1	4	0	0	0	0	0	1	0	0	0	0
02-01-04-01-01-01-05.mp4	VO	Speech	Sad	Normal	Kids	R1	A5	2	1	4	1	1	1	5	0	0	1	0	1	0	1	0	0	0
02-01-04-01-01-01-06.mp4	VO	Speech	Sad	Normal	Kids	R1	A6	2	1	4	1	1	1	6	1	1	1	1	1	1	1	1	1	1
02-01-04-01-01-01-07.mp4	VO	Speech	Sad	Normal	Kids	R1	A7	2	1	4	1	1	1	7	1	1	1	0	1	1	1	0	1	1
02-01-04-01-01-01-08.mp4	VO	Speech	Sad	Normal	Kids	R1	A8	2	1	4	1	1	1	8	1	1	1	1	1	1	1	0	1	0
02-01-04-01-01-01-09.mp4	VO	Speech	Sad	Normal	Kids	R1	A9	2	1	4	1	1	1	9	1	1	1	0	1	0	1	1	1	1
02-01-04-01-01-01-10.mp4	VO	Speech	Sad	Normal	Kids	R1	A10	2	1	4	1	1	1	10	1	1	1	1	1	1	1	1	0	1
02-01-04-01-01-01-11.mp4	VO	Speech	Sad	Normal	Kids	R1	A11	2	1	4	1	1	1	11	0	0	0	0	0	1	0	0	0	0
02-01-04-01-01-01-12.mp4	VO	Speech	Sad	Normal	Kids	R1	A12	2	1	4	1	1	1	12	1	1	1	1	1	1	1	0	1	1
02-01-04-01-01-01-13.mp4	VO	Speech	Sad	Normal	Kids	R1	A13	2	1	4	1	1	1	13	0	0	1	0	0	0	0	0	1	0
02-01-04-01-01-01-14.mp4	VO	Speech	Sad	Normal	Kids	R1	A14	2	1	4	1	1	1	14	0	0	1	1	1	0	1	0	0	0
02-01-04-01-01-01-15.mp4	VO	Speech	Sad	Normal	Kids	R1	A15	2	1	4	1	1	1	15	1	0	0	0	0	1	1	0	1	0
02-01-04-01-01-01-16.mp4	VO	Speech	Sad	Normal	Kids	R1	A16	2	1	4	1	1	1	16	0	0	0	0	0	0	0	0	0	1
02-01-04-01-01-01-17.mp4	VO	Speech	Sad	Normal	Kids	R1	A17	2	1	4	1	1	1	17	0	1	1	0	1	1	0	1	1	1
02-01-04-01-01-01-18.mp4	VO	Speech	Sad	Normal	Kids	R1	A18	2	1	4	1	1	1	18	1	1	1	1	0	1	1	0	1	1
02-01-04-01-01-01-19.mp4	VO	Speech	Sad	Normal	Kids	R1	A19	2	1	4	1	1	1	19	0	1	0	1	1	1	0	1	1	0
02-01-04-01-01-01-20.mp4	VO	Speech	Sad	Normal	Kids	R1	A20	2	1	4	1	1	1	20	1	0	0	1	0	0	1	0	0	1
02-01-04-01-01-01-21.mp4	VO	Speech	Sad	Normal	Kids	R1	A21	2	1	4	1	1	1	21	0	1	0	0	0	0	0	0	0	0
02-01-04-01-01-01-22.mp4	VO	Speech	Sad	Normal	Kids	R1	A22	2	1	4	1	1	1	22	0	0	1	1	0	1	0	0	1	0
02-01-04-01-01-01-23.mp4	VO	Speech	Sad	Normal	Kids	R1	A23	2	1	4	1	1	1	23	0	0	0	0	0	0	1	1	1	0
02-01-04-01-01-01-24.mp4	VO	Speech	Sad	Normal	Kids	R1	A24	2	1	4	1	1	1	24	1	1	1	1	1	1	1	1	0	1
02-01-04-01-01-02-01.mp4	VO	Speech	Sad	Normal	Kids	R2	A1	2	1	4	1	1	2	1	1	1	1	1	1	0	1	1	1	1
02-01-04-01-01-02-02.mp4	VO	Speech	Sad	Normal	Kids	R2	A2	2	1	4	1	1	2	2	1	1	0	0	1	1	1	0	1	1
02-01-04-01-01-02-03.mp4	VO	Speech	Sad	Normal	Kids	R2	A3	2	1	4	1	1	2	3	1	1	1	0	1	1	1	1	1	0
02-01-04-01-01-02-04.mp4	VO	Speech	Sad	Normal	Kids	R2	A4	2	1	4	1	1	2	4	1	1	1	0	1	0	1	1	1	0
02-01-04-01-01-02-05.mp4	VO	Speech	Sad	Normal	Kids	R2	A5	2	1	4	1	1	2	5	1	0	1	0	1	1	0	1	1	0
02-01-04-01-01-02-06.mp4	VO	Speech	Sad	Normal	Kids	R2	A6	2	1	4	1	1	2	6	1	1	1	1	1	1	1	1	1	1
02-01-04-01-01-02-07.mp4	VO	Speech	Sad	Normal	Kids	R2	A7	2	1	4	1	1	2	7	1	1	1	0	1	1	1	1	1	1
02-01-04-01-01-02-08.mp4	VO	Speech	Sad	Normal	Kids	R2	A8	2	1	4	1	1	2	8	1	1	1	0	1	0	1	1	0	1
02-01-04-01-01-02-09.mp4	VO	Speech	Sad	Normal	Kids	R2	A9	2	1	4	1	1	2	9	1	0	1	1	1	1	1	1	0	0
02-01-04-01-01-02-10.mp4	VO	Speech	Sad	Normal	Kids	R2	A10	2	1	4	1	1	2	10	1	1	1	1	1	1	0	1	1	1
02-01-04-01-01-02-11.mp4	VO	Speech	Sad	Normal	Kids	R2	A11	2	1	4	1	1	2	11	0	0	0	0	1	0	0	0	0	0
02-01-04-01-01-02-12.mp4	VO	Speech	Sad	Normal	Kids	R2	A12	2	1	4	1	1	2	12	1	1	1	1	1	1	1	1	0	1
02-01-04-01-01-02-13.mp4	VO	Speech	Sad	Normal	Kids	R2	A13	2	1	4	1	1	2	13	0	0	1	0	1	0	0	0	0	0
02-01-04-01-01-02-14.mp4	VO	Speech	Sad	Normal	Kids	R2	A14	2	1	4	1	1	2	14	1	1	0	1	0	1	1	1	0	0
02-01-04-01-01-02-15.mp4	VO	Speech	Sad	Normal	Kids	R2	A15	2	1	4	1	1	2	15	0	0	1	0	0	1	1	0	0	0
02-01-04-01-01-02-16.mp4	VO	Speech	Sad	Normal	Kids	R2	A16	2	1	4	1	1	2	16	1	0	1	1	0	1	1	1	1	0
02-01-04-01-01-02-17.mp4	VO	Speech	Sad	Normal	Kids	R2	A17	2	1	4	1	1	2	17	1	1	1	1	1	0	1	0	0	1
02-01-04-01-01-02-18.mp4	VO	Speech	Sad	Normal	Kids	R2	A18	2	1	4	1	1	2	18	1	1	1	0	1	1	1	0	1	1
02-01-04-01-01-02-19.mp4	VO	Speech	Sad	Normal	Kids	R2	A19	2	1	4	1	1	2	19	1	1	1	0	0	0	0	1	0	0
02-01-04-01-01-02-20.mp4	VO	Speech	Sad	Normal	Kids	R2	A20	2	1	4	1	1	2	20	0	0	0	0	0	0	0	0	0	0
02-01-04-01-01-02-21.mp4	VO	Speech	Sad	Normal	Kids	R2	A21	2	1	4	1	1	2	21	0	0	0	0	1	0	0	0	0	0
02-01-04-01-01-02-22.mp4	VO	Speech	Sad	Normal	Kids	R2	A22	2	1	4	1	1	2	22	0	0	0	0	0	0	0	0	0	1
02-01-04-01-01-02-23.mp4	VO	Speech	Sad	Normal	Kids	R2	A23	2	1	4	1	1	2	23	0	0	0	1	0	1	0	0	0	0
02-01-04-01-01-02-24.mp4	VO	Speech	Sad	Normal	Kids	R2	A24	2	1	4	1	1	2	24	1	1	1	1	1	1	1	1	0	1
02-01-04-01-02-01-01.mp4	VO	Speech	Sad	Normal	Dogs	R1	A1	2	1	4	1	2	1	1	0	0	0	0	0	1	0	0	0	1
02-01-04-01-02-01-02.mp4	VO	Speech	Sad	Normal	Dogs	R1	A2	2	1	4	1	2	1	2	0	0	0	0	0	1	0	0	0	1
02-01-04-01-02-01-03.mp4	VO	Speech	Sad	Normal	Dogs	R1	A3	2	1	4	1	2	1	3	1	1	1	1	1	1	1	0	1	1
02-01-04-01-02-01-04.mp4	VO	Speech	Sad	Normal	Dogs	R1	A4	2	1	4	1	2	1	4	0	0	0	1	0	0	1	1	1	1
02-01-04-01-02-01-05.mp4	VO	Speech	Sad	Normal	Dogs	R1	A5	2	1	4	1	2	1	5	0	1	0	1	0	0	1	0	0	1
02-01-04-01-02-01-06.mp4	VO	Speech	Sad	Normal	Dogs	R1	A6	2	1	4	1	2	1	6	1	1	0	1	1	1	1	0	1	1
02-01-04-01-02-01-07.mp4	VO	Speech	Sad	Normal	Dogs	R1	A7	2	1	4	1	2	1	7	0	1	1	1	1	0	0	1	1	1
02-01-04-01-02-01-08.mp4	VO	Speech	Sad	Normal	Dogs	R1	A8	2	1	4	1	2	1	8	0	0	1	0	0	0	0	0	0	0
02-01-04-01-02-01-09.mp4	VO	Speech	Sad	Normal	Dogs	R1	A9	2	1	4	1	2	1	9	1	1	1	0	1	0	0	1	1	0
02-01-04-01-02-01-10.mp4	VO	Speech	Sad	Normal	Dogs	R1	A10	2	1	4	1	2	1	10	1	1	1	1	1	1	0	1	1	1
02-01-04-01-02-01-11.mp4	VO	Speech	Sad	Normal	Dogs	R1	A11	2	1	4	1	2	1	11	0	0	0	0	0	0	0	1	0	0
02-01-04-01-02-01-12.mp4	VO	Speech	Sad	Normal	Dogs	R1	A12	2	1	4	1	2	1	12	1	1	1	1	1	0	0	1	1	1
02-01-04-01-02-01-13.mp4	VO	Speech	Sad	Normal	Dogs	R1	A13	2	1	4	1	2	1	13	0	0	0	1	0	1	0	1	0	0
02-01-04-01-02-01-14.mp4	VO	Speech	Sad	Normal	Dogs	R1	A14	2	1	4	1	2	1	14	0	0	0	0	1	1	0	1	1	1
02-01-04-01-02-01-15.mp4	VO	Speech	Sad	Normal	Dogs	R1	A15	2	1	4	1	2	1	15	0	1	0	0	0	1	1	1	1	0
02-01-04-01-02-01-16.mp4	VO	Speech	Sad	Normal	Dogs	R1	A16	2	1	4	1	2	1	16	1	0	0	0	1	1	0	1	0	1
02-01-04-01-02-01-17.mp4	VO	Speech	Sad	Normal	Dogs	R1	A17	2	1	4	1	2	1	17	0	1	0	1	1	1	0	0	0	0
02-01-04-01-02-01-18.mp4	VO	Speech	Sad	Normal	Dogs	R1	A18	2	1	4	1	2	1	18	1	1	1	1	1	1	1	1	1	1
02-01-04-01-02-01-19.mp4	VO	Speech	Sad	Normal	Dogs	R1	A19	2	1	4	1	2	1	19	1	1	1	1	0	0	1	1	0	1
02-01-04-01-02-01-20.mp4	VO	Speech	Sad	Normal	Dogs	R1	A20	2	1	4	1	2	1	20	1	1	1	0	0	0	1	0	0	0
02-01-04-01-02-01-21.mp4	VO	Speech	Sad	Normal	Dogs	R1	A21	2	1	4	1	2	1	21	0	0	1	0	0	0	0	0	0	0
02-01-04-01-02-01-22.mp4	VO	Speech	Sad	Normal	Dogs	R1	A22	2	1	4	1	2	1	22	1	0	1	1	0	0	0	1	0	0
02-01-04-01-02-01-23.mp4	VO	Speech	Sad	Normal	Dogs	R1	A23	2	1	4	1	2	1	23	0	0	0	0	0	0	0	1	0	1
02-01-04-01-02-01-24.mp4	VO	Speech	Sad	Normal	Dogs	R1	A24	2	1	4	1	2	1	24	1	1	1	1	0	1	0	1	1	1
02-01-04-01-02-02-01.mp4	VO	Speech	Sad	Normal	Dogs	R2	A1	2	1	4	1	2	2	1	1	1	0	1	0	0	1	0	0	1
02-01-04-01-02-02-02.mp4	VO	Speech	Sad	Normal	Dogs	R2	A2	2	1	4	1	2	2	2	1	0	1	1	1	1	1	0	0	0
02-01-04-01-02-02-03.mp4	VO	Speech	Sad	Normal	Dogs	R2	A3	2	1	4	1	2	2	3	1	1	1	1	1	1	1	1	1	1
02-01-04-01-02-02-04.mp4	VO	Speech	Sad	Normal	Dogs	R2	A4	2	1	4	1	2	2	4	1	0	1	1	0	0	0	0	1	0
02-01-04-01-02-02-05.mp4	VO	Speech	Sad	Normal	Dogs	R2	A5	2	1	4	1	2	2	5	0	1	0	0	1	0	0	0	0	1
[truncated: 2,323 more rows]

## Sheet: Song_RawAccuracy
	Independent Variables														Dependent Variables
	IV Factor level strings							IV Factor level IDs							DV Individual ratings
Filename	Modality	Channel	Emotion	Intensity	Statement	Repetition	Actor	ModalityID	ChannelID	EmotionID	IntensityID	StatementID	RepetitionID	ActorID	R1	R2	R3	R4	R5	R6	R7	R8	R9	R10
01-02-01-01-01-01-01.mp4	AV	Song	Neutral	Normal	Kids	R1	A1	1	2	1	1	1	1	1	0	1	1	1	1	1	1	1	0	1
01-02-01-01-01-01-02.mp4	AV	Song	Neutral	Normal	Kids	R1	A2	1	2	1	1	1	1	2	1	1	1	1	1	1	0	1	0	1
01-02-01-01-01-01-03.mp4	AV	Song	Neutral	Normal	Kids	R1	A3	1	2	1	1	1	1	3	1	1	1	0	0	0	1	1	0	0
01-02-01-01-01-01-04.mp4	AV	Song	Neutral	Normal	Kids	R1	A4	1	2	1	1	1	1	4	1	1	1	1	1	1	1	1	1	1
01-02-01-01-01-01-05.mp4	AV	Song	Neutral	Normal	Kids	R1	A5	1	2	1	1	1	1	5	1	1	1	1	1	1	1	1	1	1
01-02-01-01-01-01-06.mp4	AV	Song	Neutral	Normal	Kids	R1	A6	1	2	1	1	1	1	6	0	1	1	1	0	0	1	0	1	1
01-02-01-01-01-01-07.mp4	AV	Song	Neutral	Normal	Kids	R1	A7	1	2	1	1	1	1	7	1	1	1	0	1	0	1	1	1	1
01-02-01-01-01-01-08.mp4	AV	Song	Neutral	Normal	Kids	R1	A8	1	2	1	1	1	1	8	1	1	1	1	1	1	1	1	1	1
01-02-01-01-01-01-09.mp4	AV	Song	Neutral	Normal	Kids	R1	A9	1	2	1	1	1	1	9	1	1	1	1	1	1	1	1	0	1
01-02-01-01-01-01-10.mp4	AV	Song	Neutral	Normal	Kids	R1	A10	1	2	1	1	1	1	10	1	1	1	0	1	1	0	1	1	1
01-02-01-01-01-01-11.mp4	AV	Song	Neutral	Normal	Kids	R1	A11	1	2	1	1	1	1	11	1	1	0	1	1	1	0	1	1	0
01-02-01-01-01-01-12.mp4	AV	Song	Neutral	Normal	Kids	R1	A12	1	2	1	1	1	1	12	1	0	0	1	1	1	1	1	1	1
01-02-01-01-01-01-13.mp4	AV	Song	Neutral	Normal	Kids	R1	A13	1	2	1	1	1	1	13	1	1	0	1	1	1	1	1	1	1
01-02-01-01-01-01-14.mp4	AV	Song	Neutral	Normal	Kids	R1	A14	1	2	1	1	1	1	14	0	0	1	1	1	1	1	1	1	1
01-02-01-01-01-01-15.mp4	AV	Song	Neutral	Normal	Kids	R1	A15	1	2	1	1	1	1	15	1	1	1	1	1	1	1	0	0	1
01-02-01-01-01-01-16.mp4	AV	Song	Neutral	Normal	Kids	R1	A16	1	2	1	1	1	1	16	1	0	1	1	0	1	1	1	1	1
01-02-01-01-01-01-17.mp4	AV	Song	Neutral	Normal	Kids	R1	A17	1	2	1	1	1	1	17	1	1	1	1	0	1	1	1	1	1
01-02-01-01-01-01-19.mp4	AV	Song	Neutral	Normal	Kids	R1	A19	1	2	1	1	1	1	19	1	1	1	1	1	1	1	1	1	1
01-02-01-01-01-01-20.mp4	AV	Song	Neutral	Normal	Kids	R1	A20	1	2	1	1	1	1	20	0	1	1	1	1	1	1	1	1	1
01-02-01-01-01-01-21.mp4	AV	Song	Neutral	Normal	Kids	R1	A21	1	2	1	1	1	1	21	1	1	0	1	1	1	0	1	1	1
01-02-01-01-01-01-22.mp4	AV	Song	Neutral	Normal	Kids	R1	A22	1	2	1	1	1	1	22	1	0	0	1	1	1	1	0	1	1
01-02-01-01-01-01-23.mp4	AV	Song	Neutral	Normal	Kids	R1	A23	1	2	1	1	1	1	23	1	0	1	1	1	1	1	1	1	1
01-02-01-01-01-01-24.mp4	AV	Song	Neutral	Normal	Kids	R1	A24	1	2	1	1	1	1	24	1	1	0	1	1	1	1	1	0	0
01-02-01-01-01-02-01.mp4	AV	Song	Neutral	Normal	Kids	R2	A1	1	2	1	1	1	2	1	1	1	1	1	1	1	1	1	1	1
01-02-01-01-01-02-02.mp4	AV	Song	Neutral	Normal	Kids	R2	A2	1	2	1	1	1	2	2	1	0	1	1	1	1	1	1	1	1
01-02-01-01-01-02-03.mp4	AV	Song	Neutral	Normal	Kids	R2	A3	1	2	1	1	1	2	3	1	1	1	1	0	0	0	0	1	0
01-02-01-01-01-02-04.mp4	AV	Song	Neutral	Normal	Kids	R2	A4	1	2	1	1	1	2	4	1	1	1	1	1	1	1	1	1	1
01-02-01-01-01-02-05.mp4	AV	Song	Neutral	Normal	Kids	R2	A5	1	2	1	1	1	2	5	1	1	1	1	0	1	1	1	1	1
01-02-01-01-01-02-06.mp4	AV	Song	Neutral	Normal	Kids	R2	A6	1	2	1	1	1	2	6	1	1	1	1	1	1	0	1	1	1
01-02-01-01-01-02-07.mp4	AV	Song	Neutral	Normal	Kids	R2	A7	1	2	1	1	1	2	7	1	1	1	0	0	0	1	1	1	1
01-02-01-01-01-02-08.mp4	AV	Song	Neutral	Normal	Kids	R2	A8	1	2	1	1	1	2	8	0	1	1	1	1	1	1	1	0	1
01-02-01-01-01-02-09.mp4	AV	Song	Neutral	Normal	Kids	R2	A9	1	2	1	1	1	2	9	1	1	1	1	1	1	1	1	1	1
01-02-01-01-01-02-10.mp4	AV	Song	Neutral	Normal	Kids	R2	A10	1	2	1	1	1	2	10	1	1	1	0	0	0	1	0	1	0
01-02-01-01-01-02-11.mp4	AV	Song	Neutral	Normal	Kids	R2	A11	1	2	1	1	1	2	11	0	1	1	0	1	1	1	1	1	1
01-02-01-01-01-02-12.mp4	AV	Song	Neutral	Normal	Kids	R2	A12	1	2	1	1	1	2	12	1	1	0	0	1	1	0	1	0	1
01-02-01-01-01-02-13.mp4	AV	Song	Neutral	Normal	Kids	R2	A13	1	2	1	1	1	2	13	1	1	1	0	1	0	1	1	1	1
01-02-01-01-01-02-14.mp4	AV	Song	Neutral	Normal	Kids	R2	A14	1	2	1	1	1	2	14	1	1	1	1	1	1	1	1	1	1
01-02-01-01-01-02-15.mp4	AV	Song	Neutral	Normal	Kids	R2	A15	1	2	1	1	1	2	15	1	1	1	1	1	1	1	0	1	0
01-02-01-01-01-02-16.mp4	AV	Song	Neutral	Normal	Kids	R2	A16	1	2	1	1	1	2	16	1	1	1	1	1	1	0	1	1	0
01-02-01-01-01-02-17.mp4	AV	Song	Neutral	Normal	Kids	R2	A17	1	2	1	1	1	2	17	1	1	1	1	1	1	1	1	1	1
01-02-01-01-01-02-19.mp4	AV	Song	Neutral	Normal	Kids	R2	A19	1	2	1	1	1	2	19	1	1	1	1	1	1	1	1	0	1
01-02-01-01-01-02-20.mp4	AV	Song	Neutral	Normal	Kids	R2	A20	1	2	1	1	1	2	20	1	1	1	1	1	1	1	1	1	1
01-02-01-01-01-02-21.mp4	AV	Song	Neutral	Normal	Kids	R2	A21	1	2	1	1	1	2	21	1	1	1	1	1	1	1	1	1	1
01-02-01-01-01-02-22.mp4	AV	Song	Neutral	Normal	Kids	R2	A22	1	2	1	1	1	2	22	1	0	1	1	1	1	1	1	1	0
01-02-01-01-01-02-23.mp4	AV	Song	Neutral	Normal	Kids	R2	A23	1	2	1	1	1	2	23	1	1	1	1	1	1	1	1	1	1
01-02-01-01-01-02-24.mp4	AV	Song	Neutral	Normal	Kids	R2	A24	1	2	1	1	1	2	24	0	1	1	0	0	1	0	0	1	1
01-02-01-01-02-01-01.mp4	AV	Song	Neutral	Normal	Dogs	R1	A1	1	2	1	1	2	1	1	1	1	1	0	1	1	1	1	1	0
01-02-01-01-02-01-02.mp4	AV	Song	Neutral	Normal	Dogs	R1	A2	1	2	1	1	2	1	2	0	1	1	0	1	1	1	1	1	1
01-02-01-01-02-01-03.mp4	AV	Song	Neutral	Normal	Dogs	R1	A3	1	2	1	1	2	1	3	1	1	1	1	1	1	0	1	1	0
01-02-01-01-02-01-04.mp4	AV	Song	Neutral	Normal	Dogs	R1	A4	1	2	1	1	2	1	4	1	1	1	1	1	1	1	1	1	1
01-02-01-01-02-01-05.mp4	AV	Song	Neutral	Normal	Dogs	R1	A5	1	2	1	1	2	1	5	1	1	1	0	1	1	1	1	1	1
01-02-01-01-02-01-06.mp4	AV	Song	Neutral	Normal	Dogs	R1	A6	1	2	1	1	2	1	6	0	1	0	1	1	1	1	1	1	0
01-02-01-01-02-01-07.mp4	AV	Song	Neutral	Normal	Dogs	R1	A7	1	2	1	1	2	1	7	1	1	1	1	1	1	1	1	1	1
01-02-01-01-02-01-08.mp4	AV	Song	Neutral	Normal	Dogs	R1	A8	1	2	1	1	2	1	8	1	1	1	1	1	1	1	1	1	1
01-02-01-01-02-01-09.mp4	AV	Song	Neutral	Normal	Dogs	R1	A9	1	2	1	1	2	1	9	1	1	1	1	1	1	1	1	1	1
01-02-01-01-02-01-10.mp4	AV	Song	Neutral	Normal	Dogs	R1	A10	1	2	1	1	2	1	10	1	0	1	0	0	1	0	1	1	1
01-02-01-01-02-01-11.mp4	AV	Song	Neutral	Normal	Dogs	R1	A11	1	2	1	1	2	1	11	1	1	1	1	1	1	1	1	1	1
01-02-01-01-02-01-12.mp4	AV	Song	Neutral	Normal	Dogs	R1	A12	1	2	1	1	2	1	12	1	0	0	1	0	0	1	1	1	0
01-02-01-01-02-01-13.mp4	AV	Song	Neutral	Normal	Dogs	R1	A13	1	2	1	1	2	1	13	1	1	1	1	1	0	0	1	0	1
01-02-01-01-02-01-14.mp4	AV	Song	Neutral	Normal	Dogs	R1	A14	1	2	1	1	2	1	14	0	1	1	1	1	1	1	1	1	1
01-02-01-01-02-01-15.mp4	AV	Song	Neutral	Normal	Dogs	R1	A15	1	2	1	1	2	1	15	1	0	1	1	1	1	1	1	1	1
01-02-01-01-02-01-16.mp4	AV	Song	Neutral	Normal	Dogs	R1	A16	1	2	1	1	2	1	16	1	1	1	1	1	1	1	1	1	1
01-02-01-01-02-01-17.mp4	AV	Song	Neutral	Normal	Dogs	R1	A17	1	2	1	1	2	1	17	1	1	0	1	1	0	0	1	0	0
01-02-01-01-02-01-19.mp4	AV	Song	Neutral	Normal	Dogs	R1	A19	1	2	1	1	2	1	19	1	1	1	1	0	1	1	1	1	1
01-02-01-01-02-01-20.mp4	AV	Song	Neutral	Normal	Dogs	R1	A20	1	2	1	1	2	1	20	1	1	1	1	1	1	1	1	1	1
01-02-01-01-02-01-21.mp4	AV	Song	Neutral	Normal	Dogs	R1	A21	1	2	1	1	2	1	21	1	1	1	1	1	0	1	1	1	1
01-02-01-01-02-01-22.mp4	AV	Song	Neutral	Normal	Dogs	R1	A22	1	2	1	1	2	1	22	1	0	1	1	1	1	0	1	1	1
01-02-01-01-02-01-23.mp4	AV	Song	Neutral	Normal	Dogs	R1	A23	1	2	1	1	2	1	23	1	1	1	1	1	1	1	1	1	1
01-02-01-01-02-01-24.mp4	AV	Song	Neutral	Normal	Dogs	R1	A24	1	2	1	1	2	1	24	0	1	0	0	1	0	1	1	0	1
01-02-01-01-02-02-01.mp4	AV	Song	Neutral	Normal	Dogs	R2	A1	1	2	1	1	2	2	1	1	1	1	1	1	1	1	1	1	0
01-02-01-01-02-02-02.mp4	AV	Song	Neutral	Normal	Dogs	R2	A2	1	2	1	1	2	2	2	1	1	1	1	1	1	0	1	1	1
01-02-01-01-02-02-03.mp4	AV	Song	Neutral	Normal	Dogs	R2	A3	1	2	1	1	2	2	3	1	0	1	0	1	1	0	1	1	1
01-02-01-01-02-02-04.mp4	AV	Song	Neutral	Normal	Dogs	R2	A4	1	2	1	1	2	2	4	1	0	1	1	1	1	0	1	0	1
01-02-01-01-02-02-05.mp4	AV	Song	Neutral	Normal	Dogs	R2	A5	1	2	1	1	2	2	5	1	1	1	1	1	1	1	1	1	1
01-02-01-01-02-02-06.mp4	AV	Song	Neutral	Normal	Dogs	R2	A6	1	2	1	1	2	2	6	1	1	1	0	1	1	1	0	1	1
01-02-01-01-02-02-07.mp4	AV	Song	Neutral	Normal	Dogs	R2	A7	1	2	1	1	2	2	7	1	1	1	1	1	1	1	1	0	1
01-02-01-01-02-02-08.mp4	AV	Song	Neutral	Normal	Dogs	R2	A8	1	2	1	1	2	2	8	1	1	1	1	1	0	1	1	1	1
01-02-01-01-02-02-09.mp4	AV	Song	Neutral	Normal	Dogs	R2	A9	1	2	1	1	2	2	9	0	1	1	1	1	1	0	1	1	0
01-02-01-01-02-02-10.mp4	AV	Song	Neutral	Normal	Dogs	R2	A10	1	2	1	1	2	2	10	0	1	1	1	1	1	1	0	1	0
01-02-01-01-02-02-11.mp4	AV	Song	Neutral	Normal	Dogs	R2	A11	1	2	1	1	2	2	11	1	1	1	1	1	1	1	1	1	1
01-02-01-01-02-02-12.mp4	AV	Song	Neutral	Normal	Dogs	R2	A12	1	2	1	1	2	2	12	1	1	0	1	1	0	1	1	0	1
01-02-01-01-02-02-13.mp4	AV	Song	Neutral	Normal	Dogs	R2	A13	1	2	1	1	2	2	13	1	1	1	1	1	1	1	1	1	1
01-02-01-01-02-02-14.mp4	AV	Song	Neutral	Normal	Dogs	R2	A14	1	2	1	1	2	2	14	1	0	1	1	1	1	1	1	1	1
01-02-01-01-02-02-15.mp4	AV	Song	Neutral	Normal	Dogs	R2	A15	1	2	1	1	2	2	15	1	1	1	1	0	1	1	1	1	1
01-02-01-01-02-02-16.mp4	AV	Song	Neutral	Normal	Dogs	R2	A16	1	2	1	1	2	2	16	0	1	1	0	1	0	1	1	0	1
01-02-01-01-02-02-17.mp4	AV	Song	Neutral	Normal	Dogs	R2	A17	1	2	1	1	2	2	17	1	0	1	1	1	1	0	0	0	1
01-02-01-01-02-02-19.mp4	AV	Song	Neutral	Normal	Dogs	R2	A19	1	2	1	1	2	2	19	0	0	1	1	1	0	1	1	0	1
01-02-01-01-02-02-20.mp4	AV	Song	Neutral	Normal	Dogs	R2	A20	1	2	1	1	2	2	20	1	1	1	1	1	1	1	1	1	1
01-02-01-01-02-02-21.mp4	AV	Song	Neutral	Normal	Dogs	R2	A21	1	2	1	1	2	2	21	0	0	1	1	1	1	1	1	1	1
01-02-01-01-02-02-22.mp4	AV	Song	Neutral	Normal	Dogs	R2	A22	1	2	1	1	2	2	22	1	1	0	1	1	0	1	0	1	1
01-02-01-01-02-02-23.mp4	AV	Song	Neutral	Normal	Dogs	R2	A23	1	2	1	1	2	2	23	1	1	0	1	1	1	1	1	1	1
01-02-01-01-02-02-24.mp4	AV	Song	Neutral	Normal	Dogs	R2	A24	1	2	1	1	2	2	24	1	0	1	1	1	1	1	1	1	1
01-02-02-01-01-01-01.mp4	AV	Song	Calm	Normal	Kids	R1	A1	1	2	2	1	1	1	1	1	1	1	1	0	1	1	0	1	0
01-02-02-01-01-01-02.mp4	AV	Song	Calm	Normal	Kids	R1	A2	1	2	2	1	1	1	2	1	1	1	1	1	1	1	1	1	1
01-02-02-01-01-01-03.mp4	AV	Song	Calm	Normal	Kids	R1	A3	1	2	2	1	1	1	3	0	0	0	0	0	0	0	0	1	0
01-02-02-01-01-01-04.mp4	AV	Song	Calm	Normal	Kids	R1	A4	1	2	2	1	1	1	4	1	0	1	0	1	1	1	1	1	1
01-02-02-01-01-01-05.mp4	AV	Song	Calm	Normal	Kids	R1	A5	1	2	2	1	1	1	5	0	0	0	1	1	1	0	1	1	0
01-02-02-01-01-01-06.mp4	AV	Song	Calm	Normal	Kids	R1	A6	1	2	2	1	1	1	6	0	1	1	1	1	1	0	1	0	1
01-02-02-01-01-01-07.mp4	AV	Song	Calm	Normal	Kids	R1	A7	1	2	2	1	1	1	7	1	1	1	0	1	1	1	1	1	1
01-02-02-01-01-01-08.mp4	AV	Song	Calm	Normal	Kids	R1	A8	1	2	2	1	1	1	8	1	0	0	0	0	0	0	0	0	0
01-02-02-01-01-01-09.mp4	AV	Song	Calm	Normal	Kids	R1	A9	1	2	2	1	1	1	9	0	1	0	0	0	0	1	0	1	1
01-02-02-01-01-01-10.mp4	AV	Song	Calm	Normal	Kids	R1	A10	1	2	2	1	1	1	10	0	0	1	0	0	1	0	0	0	0
01-02-02-01-01-01-11.mp4	AV	Song	Calm	Normal	Kids	R1	A11	1	2	2	1	1	1	11	1	1	0	1	1	0	1	1	1	1
01-02-02-01-01-01-12.mp4	AV	Song	Calm	Normal	Kids	R1	A12	1	2	2	1	1	1	12	1	0	1	1	0	1	0	0	1	1
01-02-02-01-01-01-13.mp4	AV	Song	Calm	Normal	Kids	R1	A13	1	2	2	1	1	1	13	1	0	1	1	1	0	1	0	1	1
01-02-02-01-01-01-14.mp4	AV	Song	Calm	Normal	Kids	R1	A14	1	2	2	1	1	1	14	0	0	0	1	1	0	0	0	1	1
01-02-02-01-01-01-15.mp4	AV	Song	Calm	Normal	Kids	R1	A15	1	2	2	1	1	1	15	1	1	1	1	1	1	1	0	1	1
01-02-02-01-01-01-16.mp4	AV	Song	Calm	Normal	Kids	R1	A16	1	2	2	1	1	1	16	0	1	1	1	1	0	1	1	1	0
01-02-02-01-01-01-17.mp4	AV	Song	Calm	Normal	Kids	R1	A17	1	2	2	1	1	1	17	1	1	1	1	0	1	0	0	0	1
01-02-02-01-01-01-19.mp4	AV	Song	Calm	Normal	Kids	R1	A19	1	2	2	1	1	1	19	1	1	1	0	1	0	1	1	1	1
01-02-02-01-01-01-20.mp4	AV	Song	Calm	Normal	Kids	R1	A20	1	2	2	1	1	1	20	1	0	1	1	0	0	1	1	1	0
01-02-02-01-01-01-21.mp4	AV	Song	Calm	Normal	Kids	R1	A21	1	2	2	1	1	1	21	1	1	1	1	1	1	0	1	1	0
01-02-02-01-01-01-22.mp4	AV	Song	Calm	Normal	Kids	R1	A22	1	2	2	1	1	1	22	1	0	0	0	1	1	0	1	1	0
01-02-02-01-01-01-23.mp4	AV	Song	Calm	Normal	Kids	R1	A23	1	2	2	1	1	1	23	0	0	1	1	1	1	0	1	1	1
01-02-02-01-01-01-24.mp4	AV	Song	Calm	Normal	Kids	R1	A24	1	2	2	1	1	1	24	0	0	0	0	0	0	1	0	0	1
01-02-02-01-01-02-01.mp4	AV	Song	Calm	Normal	Kids	R2	A1	1	2	2	1	1	2	1	1	1	1	1	1	1	1	1	1	0
01-02-02-01-01-02-02.mp4	AV	Song	Calm	Normal	Kids	R2	A2	1	2	2	1	1	2	2	1	0	1	1	1	1	1	1	1	1
01-02-02-01-01-02-03.mp4	AV	Song	Calm	Normal	Kids	R2	A3	1	2	2	1	1	2	3	1	1	0	1	1	0	1	0	0	0
01-02-02-01-01-02-04.mp4	AV	Song	Calm	Normal	Kids	R2	A4	1	2	2	1	1	2	4	0	0	1	1	1	1	1	0	0	1
01-02-02-01-01-02-05.mp4	AV	Song	Calm	Normal	Kids	R2	A5	1	2	2	1	1	2	5	0	0	0	0	1	1	0	0	0	0
01-02-02-01-01-02-06.mp4	AV	Song	Calm	Normal	Kids	R2	A6	1	2	2	1	1	2	6	1	1	0	1	0	1	0	1	1	1
01-02-02-01-01-02-07.mp4	AV	Song	Calm	Normal	Kids	R2	A7	1	2	2	1	1	2	7	1	1	1	1	1	0	0	0	1	1
01-02-02-01-01-02-08.mp4	AV	Song	Calm	Normal	Kids	R2	A8	1	2	2	1	1	2	8	0	0	0	0	1	1	1	0	0	0
01-02-02-01-01-02-09.mp4	AV	Song	Calm	Normal	Kids	R2	A9	1	2	2	1	1	2	9	1	1	1	1	1	1	0	1	0	0
01-02-02-01-01-02-10.mp4	AV	Song	Calm	Normal	Kids	R2	A10	1	2	2	1	1	2	10	1	0	1	0	1	0	1	0	0	1
01-02-02-01-01-02-11.mp4	AV	Song	Calm	Normal	Kids	R2	A11	1	2	2	1	1	2	11	1	1	1	0	1	1	0	1	1	1
01-02-02-01-01-02-12.mp4	AV	Song	Calm	Normal	Kids	R2	A12	1	2	2	1	1	2	12	1	1	1	1	0	1	0	0	1	1
01-02-02-01-01-02-13.mp4	AV	Song	Calm	Normal	Kids	R2	A13	1	2	2	1	1	2	13	1	1	1	1	1	1	1	1	1	1
01-02-02-01-01-02-14.mp4	AV	Song	Calm	Normal	Kids	R2	A14	1	2	2	1	1	2	14	1	1	0	0	1	1	1	1	1	0
01-02-02-01-01-02-15.mp4	AV	Song	Calm	Normal	Kids	R2	A15	1	2	2	1	1	2	15	1	1	1	0	1	1	1	1	1	1
01-02-02-01-01-02-16.mp4	AV	Song	Calm	Normal	Kids	R2	A16	1	2	2	1	1	2	16	1	1	1	1	1	0	0	1	1	0
01-02-02-01-01-02-17.mp4	AV	Song	Calm	Normal	Kids	R2	A17	1	2	2	1	1	2	17	1	1	1	1	1	1	1	1	1	1
01-02-02-01-01-02-19.mp4	AV	Song	Calm	Normal	Kids	R2	A19	1	2	2	1	1	2	19	1	0	1	1	0	0	0	1	1	1
01-02-02-01-01-02-20.mp4	AV	Song	Calm	Normal	Kids	R2	A20	1	2	2	1	1	2	20	0	1	0	1	1	1	0	1	1	0
01-02-02-01-01-02-21.mp4	AV	Song	Calm	Normal	Kids	R2	A21	1	2	2	1	1	2	21	1	1	0	0	1	1	0	1	0	0
01-02-02-01-01-02-22.mp4	AV	Song	Calm	Normal	Kids	R2	A22	1	2	2	1	1	2	22	0	1	0	1	0	0	0	0	0	1
01-02-02-01-01-02-23.mp4	AV	Song	Calm	Normal	Kids	R2	A23	1	2	2	1	1	2	23	1	0	1	1	1	0	1	1	0	1
01-02-02-01-01-02-24.mp4	AV	Song	Calm	Normal	Kids	R2	A24	1	2	2	1	1	2	24	1	1	1	0	0	0	1	0	0	1
01-02-02-01-02-01-01.mp4	AV	Song	Calm	Normal	Dogs	R1	A1	1	2	2	1	2	1	1	0	0	1	1	1	0	0	1	1	1
01-02-02-01-02-01-02.mp4	AV	Song	Calm	Normal	Dogs	R1	A2	1	2	2	1	2	1	2	1	0	1	0	0	0	1	1	1	0
01-02-02-01-02-01-03.mp4	AV	Song	Calm	Normal	Dogs	R1	A3	1	2	2	1	2	1	3	0	0	0	0	0	1	0	0	1	0
01-02-02-01-02-01-04.mp4	AV	Song	Calm	Normal	Dogs	R1	A4	1	2	2	1	2	1	4	1	1	0	1	1	1	1	1	0	1
01-02-02-01-02-01-05.mp4	AV	Song	Calm	Normal	Dogs	R1	A5	1	2	2	1	2	1	5	0	0	1	1	1	1	0	0	0	1
01-02-02-01-02-01-06.mp4	AV	Song	Calm	Normal	Dogs	R1	A6	1	2	2	1	2	1	6	1	1	1	1	0	1	1	0	0	1
01-02-02-01-02-01-07.mp4	AV	Song	Calm	Normal	Dogs	R1	A7	1	2	2	1	2	1	7	1	1	1	0	1	1	1	1	1	0
01-02-02-01-02-01-08.mp4	AV	Song	Calm	Normal	Dogs	R1	A8	1	2	2	1	2	1	8	0	0	0	0	0	0	0	0	0	0
01-02-02-01-02-01-09.mp4	AV	Song	Calm	Normal	Dogs	R1	A9	1	2	2	1	2	1	9	0	0	1	1	1	0	0	1	1	1
01-02-02-01-02-01-10.mp4	AV	Song	Calm	Normal	Dogs	R1	A10	1	2	2	1	2	1	10	0	0	0	0	0	0	1	1	0	0
01-02-02-01-02-01-11.mp4	AV	Song	Calm	Normal	Dogs	R1	A11	1	2	2	1	2	1	11	0	1	1	0	0	1	0	0	0	1
01-02-02-01-02-01-12.mp4	AV	Song	Calm	Normal	Dogs	R1	A12	1	2	2	1	2	1	12	1	0	0	0	1	1	1	0	0	1
01-02-02-01-02-01-13.mp4	AV	Song	Calm	Normal	Dogs	R1	A13	1	2	2	1	2	1	13	1	1	1	0	1	1	1	0	1	1
01-02-02-01-02-01-14.mp4	AV	Song	Calm	Normal	Dogs	R1	A14	1	2	2	1	2	1	14	1	1	1	1	1	0	1	0	1	0
01-02-02-01-02-01-15.mp4	AV	Song	Calm	Normal	Dogs	R1	A15	1	2	2	1	2	1	15	1	1	1	0	1	1	0	1	1	1
01-02-02-01-02-01-16.mp4	AV	Song	Calm	Normal	Dogs	R1	A16	1	2	2	1	2	1	16	1	0	0	1	0	1	0	0	0	0
01-02-02-01-02-01-17.mp4	AV	Song	Calm	Normal	Dogs	R1	A17	1	2	2	1	2	1	17	1	1	1	1	1	1	1	0	1	1
01-02-02-01-02-01-19.mp4	AV	Song	Calm	Normal	Dogs	R1	A19	1	2	2	1	2	1	19	1	0	1	1	0	1	0	1	1	1
01-02-02-01-02-01-20.mp4	AV	Song	Calm	Normal	Dogs	R1	A20	1	2	2	1	2	1	20	1	1	0	0	1	0	0	0	0	1
01-02-02-01-02-01-21.mp4	AV	Song	Calm	Normal	Dogs	R1	A21	1	2	2	1	2	1	21	1	1	1	1	1	1	1	0	1	1
01-02-02-01-02-01-22.mp4	AV	Song	Calm	Normal	Dogs	R1	A22	1	2	2	1	2	1	22	0	0	1	1	1	1	1	1	1	1
01-02-02-01-02-01-23.mp4	AV	Song	Calm	Normal	Dogs	R1	A23	1	2	2	1	2	1	23	1	1	1	0	1	1	1	0	1	1
01-02-02-01-02-01-24.mp4	AV	Song	Calm	Normal	Dogs	R1	A24	1	2	2	1	2	1	24	0	1	1	1	1	0	1	0	1	1
01-02-02-01-02-02-01.mp4	AV	Song	Calm	Normal	Dogs	R2	A1	1	2	2	1	2	2	1	1	1	1	1	1	1	1	1	1	0
01-02-02-01-02-02-02.mp4	AV	Song	Calm	Normal	Dogs	R2	A2	1	2	2	1	2	2	2	1	0	1	0	1	0	0	1	1	1
01-02-02-01-02-02-03.mp4	AV	Song	Calm	Normal	Dogs	R2	A3	1	2	2	1	2	2	3	1	1	1	1	0	0	1	1	0	0
01-02-02-01-02-02-04.mp4	AV	Song	Calm	Normal	Dogs	R2	A4	1	2	2	1	2	2	4	0	1	1	0	1	1	1	0	1	1
01-02-02-01-02-02-05.mp4	AV	Song	Calm	Normal	Dogs	R2	A5	1	2	2	1	2	2	5	0	1	0	0	0	0	0	0	1	1
01-02-02-01-02-02-06.mp4	AV	Song	Calm	Normal	Dogs	R2	A6	1	2	2	1	2	2	6	1	1	1	0	1	0	1	1	1	1
01-02-02-01-02-02-07.mp4	AV	Song	Calm	Normal	Dogs	R2	A7	1	2	2	1	2	2	7	1	1	1	1	0	1	0	1	1	1
01-02-02-01-02-02-08.mp4	AV	Song	Calm	Normal	Dogs	R2	A8	1	2	2	1	2	2	8	0	0	0	0	0	0	1	0	0	0
01-02-02-01-02-02-09.mp4	AV	Song	Calm	Normal	Dogs	R2	A9	1	2	2	1	2	2	9	1	0	1	1	0	1	0	0	1	1
01-02-02-01-02-02-10.mp4	AV	Song	Calm	Normal	Dogs	R2	A10	1	2	2	1	2	2	10	0	0	0	0	0	0	0	0	0	0
01-02-02-01-02-02-11.mp4	AV	Song	Calm	Normal	Dogs	R2	A11	1	2	2	1	2	2	11	1	1	1	1	1	1	1	1	1	1
01-02-02-01-02-02-12.mp4	AV	Song	Calm	Normal	Dogs	R2	A12	1	2	2	1	2	2	12	1	1	0	1	1	0	1	1	0	0
01-02-02-01-02-02-13.mp4	AV	Song	Calm	Normal	Dogs	R2	A13	1	2	2	1	2	2	13	1	1	1	1	1	0	1	1	1	1
01-02-02-01-02-02-14.mp4	AV	Song	Calm	Normal	Dogs	R2	A14	1	2	2	1	2	2	14	1	0	0	0	1	0	0	0	1	1
01-02-02-01-02-02-15.mp4	AV	Song	Calm	Normal	Dogs	R2	A15	1	2	2	1	2	2	15	1	1	1	1	1	1	1	1	1	1
01-02-02-01-02-02-16.mp4	AV	Song	Calm	Normal	Dogs	R2	A16	1	2	2	1	2	2	16	0	0	0	1	1	0	1	1	0	0
01-02-02-01-02-02-17.mp4	AV	Song	Calm	Normal	Dogs	R2	A17	1	2	2	1	2	2	17	1	0	1	0	0	1	1	0	1	1
01-02-02-01-02-02-19.mp4	AV	Song	Calm	Normal	Dogs	R2	A19	1	2	2	1	2	2	19	1	1	1	1	1	0	1	1	1	0
01-02-02-01-02-02-20.mp4	AV	Song	Calm	Normal	Dogs	R2	A20	1	2	2	1	2	2	20	1	0	0	0	0	0	0	0	1	1
01-02-02-01-02-02-21.mp4	AV	Song	Calm	Normal	Dogs	R2	A21	1	2	2	1	2	2	21	1	1	1	1	1	1	1	1	1	1
01-02-02-01-02-02-22.mp4	AV	Song	Calm	Normal	Dogs	R2	A22	1	2	2	1	2	2	22	0	0	1	1	1	1	0	1	0	1
01-02-02-01-02-02-23.mp4	AV	Song	Calm	Normal	Dogs	R2	A23	1	2	2	1	2	2	23	1	1	1	1	1	1	1	1	1	1
01-02-02-01-02-02-24.mp4	AV	Song	Calm	Normal	Dogs	R2	A24	1	2	2	1	2	2	24	0	1	0	1	0	0	0	0	0	0
01-02-02-02-01-01-01.mp4	AV	Song	Calm	Strong	Kids	R1	A1	1	2	2	2	1	1	1	1	1	1	1	0	1	1	1	1	1
01-02-02-02-01-01-02.mp4	AV	Song	Calm	Strong	Kids	R1	A2	1	2	2	2	1	1	2	1	1	1	0	0	1	1	1	1	1
01-02-02-02-01-01-03.mp4	AV	Song	Calm	Strong	Kids	R1	A3	1	2	2	2	1	1	3	0	0	0	0	0	0	0	0	0	0
01-02-02-02-01-01-04.mp4	AV	Song	Calm	Strong	Kids	R1	A4	1	2	2	2	1	1	4	0	1	1	0	1	0	1	0	1	1
01-02-02-02-01-01-05.mp4	AV	Song	Calm	Strong	Kids	R1	A5	1	2	2	2	1	1	5	0	1	0	0	0	0	1	1	0	1
01-02-02-02-01-01-06.mp4	AV	Song	Calm	Strong	Kids	R1	A6	1	2	2	2	1	1	6	1	0	1	1	1	1	1	0	0	1
01-02-02-02-01-01-07.mp4	AV	Song	Calm	Strong	Kids	R1	A7	1	2	2	2	1	1	7	1	0	1	1	0	1	1	0	1	1
01-02-02-02-01-01-08.mp4	AV	Song	Calm	Strong	Kids	R1	A8	1	2	2	2	1	1	8	1	0	1	1	1	1	1	1	1	1
01-02-02-02-01-01-09.mp4	AV	Song	Calm	Strong	Kids	R1	A9	1	2	2	2	1	1	9	0	1	1	0	0	0	0	0	1	1
01-02-02-02-01-01-10.mp4	AV	Song	Calm	Strong	Kids	R1	A10	1	2	2	2	1	1	10	0	1	0	0	0	1	1	1	0	0
01-02-02-02-01-01-11.mp4	AV	Song	Calm	Strong	Kids	R1	A11	1	2	2	2	1	1	11	0	1	1	1	0	1	0	1	1	1
01-02-02-02-01-01-12.mp4	AV	Song	Calm	Strong	Kids	R1	A12	1	2	2	2	1	1	12	1	1	1	1	1	0	0	1	0	1
01-02-02-02-01-01-13.mp4	AV	Song	Calm	Strong	Kids	R1	A13	1	2	2	2	1	1	13	1	1	1	0	1	1	1	1	1	1
01-02-02-02-01-01-14.mp4	AV	Song	Calm	Strong	Kids	R1	A14	1	2	2	2	1	1	14	1	1	0	0	0	0	0	0	1	1
01-02-02-02-01-01-15.mp4	AV	Song	Calm	Strong	Kids	R1	A15	1	2	2	2	1	1	15	1	0	1	0	1	1	0	1	1	1
01-02-02-02-01-01-16.mp4	AV	Song	Calm	Strong	Kids	R1	A16	1	2	2	2	1	1	16	0	1	0	0	0	1	1	1	1	0
01-02-02-02-01-01-17.mp4	AV	Song	Calm	Strong	Kids	R1	A17	1	2	2	2	1	1	17	0	0	1	1	1	1	1	1	1	1
01-02-02-02-01-01-19.mp4	AV	Song	Calm	Strong	Kids	R1	A19	1	2	2	2	1	1	19	1	0	0	0	0	1	1	0	0	0
01-02-02-02-01-01-20.mp4	AV	Song	Calm	Strong	Kids	R1	A20	1	2	2	2	1	1	20	0	0	0	1	1	1	1	1	1	0
01-02-02-02-01-01-21.mp4	AV	Song	Calm	Strong	Kids	R1	A21	1	2	2	2	1	1	21	1	1	1	1	1	1	1	0	1	1
01-02-02-02-01-01-22.mp4	AV	Song	Calm	Strong	Kids	R1	A22	1	2	2	2	1	1	22	1	1	1	1	1	1	1	1	1	1
01-02-02-02-01-01-23.mp4	AV	Song	Calm	Strong	Kids	R1	A23	1	2	2	2	1	1	23	1	1	1	1	1	1	1	0	0	1
01-02-02-02-01-01-24.mp4	AV	Song	Calm	Strong	Kids	R1	A24	1	2	2	2	1	1	24	0	0	1	1	0	1	0	0	0	1
01-02-02-02-01-02-01.mp4	AV	Song	Calm	Strong	Kids	R2	A1	1	2	2	2	1	2	1	1	1	1	0	1	0	1	1	1	1
01-02-02-02-01-02-02.mp4	AV	Song	Calm	Strong	Kids	R2	A2	1	2	2	2	1	2	2	1	1	0	1	1	1	1	1	1	1
01-02-02-02-01-02-03.mp4	AV	Song	Calm	Strong	Kids	R2	A3	1	2	2	2	1	2	3	0	0	0	1	0	0	0	1	0	0
01-02-02-02-01-02-04.mp4	AV	Song	Calm	Strong	Kids	R2	A4	1	2	2	2	1	2	4	1	1	1	1	1	0	1	1	0	1
01-02-02-02-01-02-05.mp4	AV	Song	Calm	Strong	Kids	R2	A5	1	2	2	2	1	2	5	0	1	1	0	1	0	1	1	1	1
01-02-02-02-01-02-06.mp4	AV	Song	Calm	Strong	Kids	R2	A6	1	2	2	2	1	2	6	1	1	1	1	1	1	1	1	1	1
01-02-02-02-01-02-07.mp4	AV	Song	Calm	Strong	Kids	R2	A7	1	2	2	2	1	2	7	1	1	1	1	0	1	1	1	1	1
01-02-02-02-01-02-08.mp4	AV	Song	Calm	Strong	Kids	R2	A8	1	2	2	2	1	2	8	1	0	0	0	0	0	1	0	1	0
01-02-02-02-01-02-09.mp4	AV	Song	Calm	Strong	Kids	R2	A9	1	2	2	2	1	2	9	0	0	0	1	1	1	0	1	1	0
01-02-02-02-01-02-10.mp4	AV	Song	Calm	Strong	Kids	R2	A10	1	2	2	2	1	2	10	0	1	0	1	1	0	1	0	0	0
01-02-02-02-01-02-11.mp4	AV	Song	Calm	Strong	Kids	R2	A11	1	2	2	2	1	2	11	1	1	1	1	1	1	0	1	1	0
01-02-02-02-01-02-12.mp4	AV	Song	Calm	Strong	Kids	R2	A12	1	2	2	2	1	2	12	1	1	1	0	1	0	0	0	1	1
01-02-02-02-01-02-13.mp4	AV	Song	Calm	Strong	Kids	R2	A13	1	2	2	2	1	2	13	1	0	1	1	1	1	0	1	1	1
01-02-02-02-01-02-14.mp4	AV	Song	Calm	Strong	Kids	R2	A14	1	2	2	2	1	2	14	1	1	1	0	1	1	1	1	1	1
01-02-02-02-01-02-15.mp4	AV	Song	Calm	Strong	Kids	R2	A15	1	2	2	2	1	2	15	1	1	1	1	1	1	0	1	1	1
01-02-02-02-01-02-16.mp4	AV	Song	Calm	Strong	Kids	R2	A16	1	2	2	2	1	2	16	0	0	1	0	0	1	0	1	0	1
01-02-02-02-01-02-17.mp4	AV	Song	Calm	Strong	Kids	R2	A17	1	2	2	2	1	2	17	1	1	1	0	1	1	1	1	1	1
01-02-02-02-01-02-19.mp4	AV	Song	Calm	Strong	Kids	R2	A19	1	2	2	2	1	2	19	0	0	0	0	0	0	1	0	1	0
01-02-02-02-01-02-20.mp4	AV	Song	Calm	Strong	Kids	R2	A20	1	2	2	2	1	2	20	1	1	0	0	0	0	0	1	0	0
01-02-02-02-01-02-21.mp4	AV	Song	Calm	Strong	Kids	R2	A21	1	2	2	2	1	2	21	1	1	1	1	1	1	1	1	1	1
01-02-02-02-01-02-22.mp4	AV	Song	Calm	Strong	Kids	R2	A22	1	2	2	2	1	2	22	0	0	1	1	1	1	1	1	1	1
01-02-02-02-01-02-23.mp4	AV	Song	Calm	Strong	Kids	R2	A23	1	2	2	2	1	2	23	1	1	1	1	1	1	1	1	1	1
01-02-02-02-01-02-24.mp4	AV	Song	Calm	Strong	Kids	R2	A24	1	2	2	2	1	2	24	1	1	1	1	1	0	0	1	1	0
01-02-02-02-02-01-01.mp4	AV	Song	Calm	Strong	Dogs	R1	A1	1	2	2	2	2	1	1	0	0	0	1	0	1	0	1	0	1
01-02-02-02-02-01-02.mp4	AV	Song	Calm	Strong	Dogs	R1	A2	1	2	2	2	2	1	2	1	1	0	1	1	1	0	0	1	1
01-02-02-02-02-01-03.mp4	AV	Song	Calm	Strong	Dogs	R1	A3	1	2	2	2	2	1	3	0	0	0	0	0	0	0	0	0	1
01-02-02-02-02-01-04.mp4	AV	Song	Calm	Strong	Dogs	R1	A4	1	2	2	2	2	1	4	0	0	1	1	1	0	0	1	1	1
01-02-02-02-02-01-05.mp4	AV	Song	Calm	Strong	Dogs	R1	A5	1	2	2	2	2	1	5	1	1	1	0	1	1	0	1	1	1
01-02-02-02-02-01-06.mp4	AV	Song	Calm	Strong	Dogs	R1	A6	1	2	2	2	2	1	6	0	1	1	1	1	1	1	1	1	1
01-02-02-02-02-01-07.mp4	AV	Song	Calm	Strong	Dogs	R1	A7	1	2	2	2	2	1	7	1	1	1	1	1	1	1	1	1	1
01-02-02-02-02-01-08.mp4	AV	Song	Calm	Strong	Dogs	R1	A8	1	2	2	2	2	1	8	1	0	0	1	0	1	1	1	1	1
01-02-02-02-02-01-09.mp4	AV	Song	Calm	Strong	Dogs	R1	A9	1	2	2	2	2	1	9	0	0	0	0	1	1	0	0	1	1
01-02-02-02-02-01-10.mp4	AV	Song	Calm	Strong	Dogs	R1	A10	1	2	2	2	2	1	10	0	0	1	1	0	0	0	0	0	1
01-02-02-02-02-01-11.mp4	AV	Song	Calm	Strong	Dogs	R1	A11	1	2	2	2	2	1	11	1	1	1	1	1	1	1	1	1	1
01-02-02-02-02-01-12.mp4	AV	Song	Calm	Strong	Dogs	R1	A12	1	2	2	2	2	1	12	1	0	0	1	0	0	1	0	1	1
01-02-02-02-02-01-13.mp4	AV	Song	Calm	Strong	Dogs	R1	A13	1	2	2	2	2	1	13	1	1	1	1	1	1	1	1	1	1
01-02-02-02-02-01-14.mp4	AV	Song	Calm	Strong	Dogs	R1	A14	1	2	2	2	2	1	14	0	0	1	0	0	0	0	0	1	1
01-02-02-02-02-01-15.mp4	AV	Song	Calm	Strong	Dogs	R1	A15	1	2	2	2	2	1	15	1	1	1	0	0	1	0	1	1	1
01-02-02-02-02-01-16.mp4	AV	Song	Calm	Strong	Dogs	R1	A16	1	2	2	2	2	1	16	0	1	0	1	1	1	1	1	0	0
01-02-02-02-02-01-17.mp4	AV	Song	Calm	Strong	Dogs	R1	A17	1	2	2	2	2	1	17	1	0	1	1	1	1	1	1	1	1
01-02-02-02-02-01-19.mp4	AV	Song	Calm	Strong	Dogs	R1	A19	1	2	2	2	2	1	19	1	1	1	0	1	1	1	0	1	1
01-02-02-02-02-01-20.mp4	AV	Song	Calm	Strong	Dogs	R1	A20	1	2	2	2	2	1	20	1	1	0	1	1	0	1	1	1	1
01-02-02-02-02-01-21.mp4	AV	Song	Calm	Strong	Dogs	R1	A21	1	2	2	2	2	1	21	1	1	1	1	0	1	1	1	1	1
01-02-02-02-02-01-22.mp4	AV	Song	Calm	Strong	Dogs	R1	A22	1	2	2	2	2	1	22	1	1	1	1	1	1	1	1	1	1
01-02-02-02-02-01-23.mp4	AV	Song	Calm	Strong	Dogs	R1	A23	1	2	2	2	2	1	23	1	1	1	1	1	1	1	1	1	1
01-02-02-02-02-01-24.mp4	AV	Song	Calm	Strong	Dogs	R1	A24	1	2	2	2	2	1	24	0	0	1	0	1	1	1	0	0	1
01-02-02-02-02-02-01.mp4	AV	Song	Calm	Strong	Dogs	R2	A1	1	2	2	2	2	2	1	0	1	1	1	1	1	1	1	0	1
01-02-02-02-02-02-02.mp4	AV	Song	Calm	Strong	Dogs	R2	A2	1	2	2	2	2	2	2	1	1	0	0	1	1	1	0	0	1
01-02-02-02-02-02-03.mp4	AV	Song	Calm	Strong	Dogs	R2	A3	1	2	2	2	2	2	3	0	0	1	0	0	0	0	0	0	0
01-02-02-02-02-02-04.mp4	AV	Song	Calm	Strong	Dogs	R2	A4	1	2	2	2	2	2	4	1	1	1	1	0	1	1	1	0	1
01-02-02-02-02-02-05.mp4	AV	Song	Calm	Strong	Dogs	R2	A5	1	2	2	2	2	2	5	0	1	1	0	0	0	1	0	1	1
01-02-02-02-02-02-06.mp4	AV	Song	Calm	Strong	Dogs	R2	A6	1	2	2	2	2	2	6	1	0	0	1	1	1	1	0	0	1
01-02-02-02-02-02-07.mp4	AV	Song	Calm	Strong	Dogs	R2	A7	1	2	2	2	2	2	7	1	1	1	1	1	1	0	1	1	1
01-02-02-02-02-02-08.mp4	AV	Song	Calm	Strong	Dogs	R2	A8	1	2	2	2	2	2	8	0	1	0	1	1	0	0	1	1	1
01-02-02-02-02-02-09.mp4	AV	Song	Calm	Strong	Dogs	R2	A9	1	2	2	2	2	2	9	1	1	0	1	0	0	0	0	0	1
01-02-02-02-02-02-10.mp4	AV	Song	Calm	Strong	Dogs	R2	A10	1	2	2	2	2	2	10	1	0	0	0	0	0	0	1	0	0
01-02-02-02-02-02-11.mp4	AV	Song	Calm	Strong	Dogs	R2	A11	1	2	2	2	2	2	11	1	1	1	0	1	1	1	1	1	1
01-02-02-02-02-02-12.mp4	AV	Song	Calm	Strong	Dogs	R2	A12	1	2	2	2	2	2	12	0	1	1	0	1	0	0	1	1	0
01-02-02-02-02-02-13.mp4	AV	Song	Calm	Strong	Dogs	R2	A13	1	2	2	2	2	2	13	1	1	1	1	1	0	1	1	1	1
01-02-02-02-02-02-14.mp4	AV	Song	Calm	Strong	Dogs	R2	A14	1	2	2	2	2	2	14	1	1	0	1	1	1	1	1	1	1
01-02-02-02-02-02-15.mp4	AV	Song	Calm	Strong	Dogs	R2	A15	1	2	2	2	2	2	15	1	1	1	1	1	1	1	1	1	1
01-02-02-02-02-02-16.mp4	AV	Song	Calm	Strong	Dogs	R2	A16	1	2	2	2	2	2	16	0	0	0	0	1	0	0	0	0	1
01-02-02-02-02-02-17.mp4	AV	Song	Calm	Strong	Dogs	R2	A17	1	2	2	2	2	2	17	0	1	0	1	1	1	1	1	1	1
01-02-02-02-02-02-19.mp4	AV	Song	Calm	Strong	Dogs	R2	A19	1	2	2	2	2	2	19	0	0	0	0	0	0	0	0	0	0
01-02-02-02-02-02-20.mp4	AV	Song	Calm	Strong	Dogs	R2	A20	1	2	2	2	2	2	20	0	0	1	0	1	1	1	1	1	0
01-02-02-02-02-02-21.mp4	AV	Song	Calm	Strong	Dogs	R2	A21	1	2	2	2	2	2	21	1	1	1	1	1	1	1	1	1	1
01-02-02-02-02-02-22.mp4	AV	Song	Calm	Strong	Dogs	R2	A22	1	2	2	2	2	2	22	1	0	0	0	1	1	1	1	1	1
01-02-02-02-02-02-23.mp4	AV	Song	Calm	Strong	Dogs	R2	A23	1	2	2	2	2	2	23	1	1	1	1	1	1	1	1	0	1
01-02-02-02-02-02-24.mp4	AV	Song	Calm	Strong	Dogs	R2	A24	1	2	2	2	2	2	24	1	1	1	1	1	1	1	1	1	1
01-02-03-01-01-01-01.mp4	AV	Song	Happy	Normal	Kids	R1	A1	1	2	3	1	1	1	1	1	1	1	1	1	1	1	1	1	1
01-02-03-01-01-01-02.mp4	AV	Song	Happy	Normal	Kids	R1	A2	1	2	3	1	1	1	2	1	1	1	1	1	1	1	1	1	1
01-02-03-01-01-01-03.mp4	AV	Song	Happy	Normal	Kids	R1	A3	1	2	3	1	1	1	3	1	1	1	0	1	1	0	1	1	0
01-02-03-01-01-01-04.mp4	AV	Song	Happy	Normal	Kids	R1	A4	1	2	3	1	1	1	4	1	1	1	1	1	1	1	1	1	1
01-02-03-01-01-01-05.mp4	AV	Song	Happy	Normal	Kids	R1	A5	1	2	3	1	1	1	5	1	1	1	0	1	0	1	1	1	1
01-02-03-01-01-01-06.mp4	AV	Song	Happy	Normal	Kids	R1	A6	1	2	3	1	1	1	6	1	1	1	1	1	0	1	1	1	1
01-02-03-01-01-01-07.mp4	AV	Song	Happy	Normal	Kids	R1	A7	1	2	3	1	1	1	7	1	1	1	1	1	1	1	1	1	1
01-02-03-01-01-01-08.mp4	AV	Song	Happy	Normal	Kids	R1	A8	1	2	3	1	1	1	8	1	1	1	1	1	1	1	1	1	1
01-02-03-01-01-01-09.mp4	AV	Song	Happy	Normal	Kids	R1	A9	1	2	3	1	1	1	9	0	0	0	1	1	1	1	0	0	1
01-02-03-01-01-01-10.mp4	AV	Song	Happy	Normal	Kids	R1	A10	1	2	3	1	1	1	10	1	1	1	1	1	1	1	1	1	1
01-02-03-01-01-01-11.mp4	AV	Song	Happy	Normal	Kids	R1	A11	1	2	3	1	1	1	11	1	1	1	1	1	0	1	1	1	1
01-02-03-01-01-01-12.mp4	AV	Song	Happy	Normal	Kids	R1	A12	1	2	3	1	1	1	12	1	1	1	1	1	1	1	1	1	1
01-02-03-01-01-01-13.mp4	AV	Song	Happy	Normal	Kids	R1	A13	1	2	3	1	1	1	13	1	1	1	1	1	1	1	1	1	0
01-02-03-01-01-01-14.mp4	AV	Song	Happy	Normal	Kids	R1	A14	1	2	3	1	1	1	14	1	1	1	1	1	1	1	0	1	1
01-02-03-01-01-01-15.mp4	AV	Song	Happy	Normal	Kids	R1	A15	1	2	3	1	1	1	15	1	1	1	1	1	1	1	1	0	0
01-02-03-01-01-01-16.mp4	AV	Song	Happy	Normal	Kids	R1	A16	1	2	3	1	1	1	16	1	1	0	0	1	1	1	1	0	1
01-02-03-01-01-01-17.mp4	AV	Song	Happy	Normal	Kids	R1	A17	1	2	3	1	1	1	17	0	0	0	1	0	0	1	1	1	1
01-02-03-01-01-01-19.mp4	AV	Song	Happy	Normal	Kids	R1	A19	1	2	3	1	1	1	19	1	1	1	1	1	1	1	1	1	1
01-02-03-01-01-01-20.mp4	AV	Song	Happy	Normal	Kids	R1	A20	1	2	3	1	1	1	20	1	1	1	1	1	1	1	1	1	1
01-02-03-01-01-01-21.mp4	AV	Song	Happy	Normal	Kids	R1	A21	1	2	3	1	1	1	21	1	1	1	1	1	1	1	0	1	1
01-02-03-01-01-01-22.mp4	AV	Song	Happy	Normal	Kids	R1	A22	1	2	3	1	1	1	22	1	1	1	1	0	1	1	1	1	1
01-02-03-01-01-01-23.mp4	AV	Song	Happy	Normal	Kids	R1	A23	1	2	3	1	1	1	23	1	1	1	1	1	1	1	0	1	1
01-02-03-01-01-01-24.mp4	AV	Song	Happy	Normal	Kids	R1	A24	1	2	3	1	1	1	24	1	1	1	1	1	1	1	1	1	1
01-02-03-01-01-02-01.mp4	AV	Song	Happy	Normal	Kids	R2	A1	1	2	3	1	1	2	1	1	1	1	1	1	1	1	1	1	1
01-02-03-01-01-02-02.mp4	AV	Song	Happy	Normal	Kids	R2	A2	1	2	3	1	1	2	2	1	1	1	1	1	1	1	1	0	1
01-02-03-01-01-02-03.mp4	AV	Song	Happy	Normal	Kids	R2	A3	1	2	3	1	1	2	3	1	1	0	1	0	1	1	0	1	0
01-02-03-01-01-02-04.mp4	AV	Song	Happy	Normal	Kids	R2	A4	1	2	3	1	1	2	4	1	1	1	1	1	1	1	1	1	0
01-02-03-01-01-02-05.mp4	AV	Song	Happy	Normal	Kids	R2	A5	1	2	3	1	1	2	5	1	1	1	1	1	1	1	1	1	1
01-02-03-01-01-02-06.mp4	AV	Song	Happy	Normal	Kids	R2	A6	1	2	3	1	1	2	6	1	1	1	1	1	0	1	0	1	1
01-02-03-01-01-02-07.mp4	AV	Song	Happy	Normal	Kids	R2	A7	1	2	3	1	1	2	7	1	1	1	1	1	0	1	0	1	1
01-02-03-01-01-02-08.mp4	AV	Song	Happy	Normal	Kids	R2	A8	1	2	3	1	1	2	8	1	1	1	1	1	1	1	1	1	1
01-02-03-01-01-02-09.mp4	AV	Song	Happy	Normal	Kids	R2	A9	1	2	3	1	1	2	9	1	0	1	0	1	0	0	1	1	0
01-02-03-01-01-02-10.mp4	AV	Song	Happy	Normal	Kids	R2	A10	1	2	3	1	1	2	10	1	0	1	1	1	1	1	1	1	1
01-02-03-01-01-02-11.mp4	AV	Song	Happy	Normal	Kids	R2	A11	1	2	3	1	1	2	11	0	1	1	1	0	0	1	0	1	1
01-02-03-01-01-02-12.mp4	AV	Song	Happy	Normal	Kids	R2	A12	1	2	3	1	1	2	12	1	1	1	1	1	1	1	1	1	1
01-02-03-01-01-02-13.mp4	AV	Song	Happy	Normal	Kids	R2	A13	1	2	3	1	1	2	13	1	1	1	1	1	1	1	1	1	1
01-02-03-01-01-02-14.mp4	AV	Song	Happy	Normal	Kids	R2	A14	1	2	3	1	1	2	14	1	1	1	1	0	1	1	0	1	1
01-02-03-01-01-02-15.mp4	AV	Song	Happy	Normal	Kids	R2	A15	1	2	3	1	1	2	15	0	1	1	1	1	1	0	0	1	1
01-02-03-01-01-02-16.mp4	AV	Song	Happy	Normal	Kids	R2	A16	1	2	3	1	1	2	16	1	1	0	1	1	0	1	1	1	1
01-02-03-01-01-02-17.mp4	AV	Song	Happy	Normal	Kids	R2	A17	1	2	3	1	1	2	17	1	0	1	1	0	0	1	1	0	1
01-02-03-01-01-02-19.mp4	AV	Song	Happy	Normal	Kids	R2	A19	1	2	3	1	1	2	19	1	1	1	1	1	1	1	1	1	1
01-02-03-01-01-02-20.mp4	AV	Song	Happy	Normal	Kids	R2	A20	1	2	3	1	1	2	20	1	1	1	1	1	1	1	1	1	1
01-02-03-01-01-02-21.mp4	AV	Song	Happy	Normal	Kids	R2	A21	1	2	3	1	1	2	21	1	1	1	1	1	1	1	1	0	0
01-02-03-01-01-02-22.mp4	AV	Song	Happy	Normal	Kids	R2	A22	1	2	3	1	1	2	22	1	1	1	1	0	1	1	1	1	0
01-02-03-01-01-02-23.mp4	AV	Song	Happy	Normal	Kids	R2	A23	1	2	3	1	1	2	23	0	0	1	1	1	1	1	1	1	0
01-02-03-01-01-02-24.mp4	AV	Song	Happy	Normal	Kids	R2	A24	1	2	3	1	1	2	24	0	1	1	1	1	1	1	1	0	1
01-02-03-01-02-01-01.mp4	AV	Song	Happy	Normal	Dogs	R1	A1	1	2	3	1	2	1	1	1	1	1	1	1	1	1	1	1	1
01-02-03-01-02-01-02.mp4	AV	Song	Happy	Normal	Dogs	R1	A2	1	2	3	1	2	1	2	1	0	1	1	1	1	1	1	1	1
01-02-03-01-02-01-03.mp4	AV	Song	Happy	Normal	Dogs	R1	A3	1	2	3	1	2	1	3	1	0	1	1	0	0	0	0	1	0
01-02-03-01-02-01-04.mp4	AV	Song	Happy	Normal	Dogs	R1	A4	1	2	3	1	2	1	4	1	1	1	1	1	0	1	1	1	1
01-02-03-01-02-01-05.mp4	AV	Song	Happy	Normal	Dogs	R1	A5	1	2	3	1	2	1	5	0	1	1	1	1	1	1	1	1	1
01-02-03-01-02-01-06.mp4	AV	Song	Happy	Normal	Dogs	R1	A6	1	2	3	1	2	1	6	1	1	1	0	1	1	1	1	1	1
01-02-03-01-02-01-07.mp4	AV	Song	Happy	Normal	Dogs	R1	A7	1	2	3	1	2	1	7	1	1	1	1	1	1	1	1	1	1
01-02-03-01-02-01-08.mp4	AV	Song	Happy	Normal	Dogs	R1	A8	1	2	3	1	2	1	8	1	1	1	1	1	1	1	1	1	0
01-02-03-01-02-01-09.mp4	AV	Song	Happy	Normal	Dogs	R1	A9	1	2	3	1	2	1	9	1	1	1	1	1	0	1	1	1	0
01-02-03-01-02-01-10.mp4	AV	Song	Happy	Normal	Dogs	R1	A10	1	2	3	1	2	1	10	1	1	1	1	1	1	1	1	1	1
01-02-03-01-02-01-11.mp4	AV	Song	Happy	Normal	Dogs	R1	A11	1	2	3	1	2	1	11	1	0	1	1	1	0	1	1	1	1
01-02-03-01-02-01-12.mp4	AV	Song	Happy	Normal	Dogs	R1	A12	1	2	3	1	2	1	12	1	1	1	0	1	1	0	1	1	1
01-02-03-01-02-01-13.mp4	AV	Song	Happy	Normal	Dogs	R1	A13	1	2	3	1	2	1	13	1	1	1	1	1	1	1	1	1	1
01-02-03-01-02-01-14.mp4	AV	Song	Happy	Normal	Dogs	R1	A14	1	2	3	1	2	1	14	1	1	1	1	1	1	1	1	1	1
01-02-03-01-02-01-15.mp4	AV	Song	Happy	Normal	Dogs	R1	A15	1	2	3	1	2	1	15	1	0	1	1	1	1	1	1	1	1
01-02-03-01-02-01-16.mp4	AV	Song	Happy	Normal	Dogs	R1	A16	1	2	3	1	2	1	16	1	1	1	1	1	1	1	1	1	1
01-02-03-01-02-01-17.mp4	AV	Song	Happy	Normal	Dogs	R1	A17	1	2	3	1	2	1	17	0	1	0	1	1	1	1	1	1	0
01-02-03-01-02-01-19.mp4	AV	Song	Happy	Normal	Dogs	R1	A19	1	2	3	1	2	1	19	1	1	1	1	1	1	1	1	1	1
01-02-03-01-02-01-20.mp4	AV	Song	Happy	Normal	Dogs	R1	A20	1	2	3	1	2	1	20	1	1	1	1	1	1	1	1	1	1
01-02-03-01-02-01-21.mp4	AV	Song	Happy	Normal	Dogs	R1	A21	1	2	3	1	2	1	21	1	0	1	0	1	1	1	0	0	1
01-02-03-01-02-01-22.mp4	AV	Song	Happy	Normal	Dogs	R1	A22	1	2	3	1	2	1	22	1	1	1	1	1	1	1	1	1	1
01-02-03-01-02-01-23.mp4	AV	Song	Happy	Normal	Dogs	R1	A23	1	2	3	1	2	1	23	1	0	1	1	1	1	0	0	1	1
01-02-03-01-02-01-24.mp4	AV	Song	Happy	Normal	Dogs	R1	A24	1	2	3	1	2	1	24	1	1	1	1	0	1	1	1	1	1
01-02-03-01-02-02-01.mp4	AV	Song	Happy	Normal	Dogs	R2	A1	1	2	3	1	2	2	1	0	1	1	1	1	1	1	1	1	1
01-02-03-01-02-02-02.mp4	AV	Song	Happy	Normal	Dogs	R2	A2	1	2	3	1	2	2	2	1	1	1	1	1	1	1	1	1	1
01-02-03-01-02-02-03.mp4	AV	Song	Happy	Normal	Dogs	R2	A3	1	2	3	1	2	2	3	0	1	1	1	0	0	1	1	0	1
01-02-03-01-02-02-04.mp4	AV	Song	Happy	Normal	Dogs	R2	A4	1	2	3	1	2	2	4	1	1	1	1	0	1	1	1	1	1
01-02-03-01-02-02-05.mp4	AV	Song	Happy	Normal	Dogs	R2	A5	1	2	3	1	2	2	5	1	1	1	1	1	1	0	1	0	1
01-02-03-01-02-02-06.mp4	AV	Song	Happy	Normal	Dogs	R2	A6	1	2	3	1	2	2	6	1	1	1	1	1	1	0	1	1	1
01-02-03-01-02-02-07.mp4	AV	Song	Happy	Normal	Dogs	R2	A7	1	2	3	1	2	2	7	1	0	1	1	1	1	1	1	1	1
01-02-03-01-02-02-08.mp4	AV	Song	Happy	Normal	Dogs	R2	A8	1	2	3	1	2	2	8	1	1	1	1	1	1	1	1	0	1
01-02-03-01-02-02-09.mp4	AV	Song	Happy	Normal	Dogs	R2	A9	1	2	3	1	2	2	9	1	1	1	0	1	1	1	1	1	0
01-02-03-01-02-02-10.mp4	AV	Song	Happy	Normal	Dogs	R2	A10	1	2	3	1	2	2	10	1	1	1	1	1	1	1	1	0	1
01-02-03-01-02-02-11.mp4	AV	Song	Happy	Normal	Dogs	R2	A11	1	2	3	1	2	2	11	1	1	1	0	1	0	1	1	1	1
01-02-03-01-02-02-12.mp4	AV	Song	Happy	Normal	Dogs	R2	A12	1	2	3	1	2	2	12	1	1	1	1	1	0	1	1	1	1
01-02-03-01-02-02-13.mp4	AV	Song	Happy	Normal	Dogs	R2	A13	1	2	3	1	2	2	13	1	1	1	1	0	1	1	1	1	1
01-02-03-01-02-02-14.mp4	AV	Song	Happy	Normal	Dogs	R2	A14	1	2	3	1	2	2	14	1	1	0	0	1	1	1	0	1	1
01-02-03-01-02-02-15.mp4	AV	Song	Happy	Normal	Dogs	R2	A15	1	2	3	1	2	2	15	1	1	1	1	1	1	1	1	1	1
01-02-03-01-02-02-16.mp4	AV	Song	Happy	Normal	Dogs	R2	A16	1	2	3	1	2	2	16	1	1	1	1	1	1	1	1	1	1
01-02-03-01-02-02-17.mp4	AV	Song	Happy	Normal	Dogs	R2	A17	1	2	3	1	2	2	17	1	1	0	1	1	0	1	1	0	0
01-02-03-01-02-02-19.mp4	AV	Song	Happy	Normal	Dogs	R2	A19	1	2	3	1	2	2	19	1	1	1	1	1	1	1	1	1	1
01-02-03-01-02-02-20.mp4	AV	Song	Happy	Normal	Dogs	R2	A20	1	2	3	1	2	2	20	1	1	1	1	1	1	1	1	1	1
01-02-03-01-02-02-21.mp4	AV	Song	Happy	Normal	Dogs	R2	A21	1	2	3	1	2	2	21	0	1	1	0	1	1	1	1	1	1
01-02-03-01-02-02-22.mp4	AV	Song	Happy	Normal	Dogs	R2	A22	1	2	3	1	2	2	22	1	1	1	1	1	1	1	1	1	1
01-02-03-01-02-02-23.mp4	AV	Song	Happy	Normal	Dogs	R2	A23	1	2	3	1	2	2	23	1	1	0	1	0	0	1	1	0	1
01-02-03-01-02-02-24.mp4	AV	Song	Happy	Normal	Dogs	R2	A24	1	2	3	1	2	2	24	1	1	1	1	1	1	1	1	1	1
01-02-03-02-01-01-01.mp4	AV	Song	Happy	Strong	Kids	R1	A1	1	2	3	2	1	1	1	1	1	1	1	1	1	1	1	1	1
01-02-03-02-01-01-02.mp4	AV	Song	Happy	Strong	Kids	R1	A2	1	2	3	2	1	1	2	1	1	1	1	1	1	1	1	1	1
01-02-03-02-01-01-03.mp4	AV	Song	Happy	Strong	Kids	R1	A3	1	2	3	2	1	1	3	1	1	1	0	1	1	0	1	0	1
01-02-03-02-01-01-04.mp4	AV	Song	Happy	Strong	Kids	R1	A4	1	2	3	2	1	1	4	1	1	1	1	1	1	1	1	1	1
01-02-03-02-01-01-05.mp4	AV	Song	Happy	Strong	Kids	R1	A5	1	2	3	2	1	1	5	1	1	0	1	1	0	1	1	1	1
01-02-03-02-01-01-06.mp4	AV	Song	Happy	Strong	Kids	R1	A6	1	2	3	2	1	1	6	1	1	1	1	1	1	1	1	1	1
01-02-03-02-01-01-07.mp4	AV	Song	Happy	Strong	Kids	R1	A7	1	2	3	2	1	1	7	1	1	1	0	1	1	1	1	1	1
01-02-03-02-01-01-08.mp4	AV	Song	Happy	Strong	Kids	R1	A8	1	2	3	2	1	1	8	1	1	1	1	1	1	1	1	1	1
01-02-03-02-01-01-09.mp4	AV	Song	Happy	Strong	Kids	R1	A9	1	2	3	2	1	1	9	1	1	1	1	0	1	1	0	1	1
01-02-03-02-01-01-10.mp4	AV	Song	Happy	Strong	Kids	R1	A10	1	2	3	2	1	1	10	1	1	1	1	1	1	1	1	1	1
01-02-03-02-01-01-11.mp4	AV	Song	Happy	Strong	Kids	R1	A11	1	2	3	2	1	1	11	1	1	1	1	1	1	1	1	1	1
01-02-03-02-01-01-12.mp4	AV	Song	Happy	Strong	Kids	R1	A12	1	2	3	2	1	1	12	1	1	0	1	1	1	1	1	1	1
01-02-03-02-01-01-13.mp4	AV	Song	Happy	Strong	Kids	R1	A13	1	2	3	2	1	1	13	1	1	1	1	1	1	1	1	1	1
01-02-03-02-01-01-14.mp4	AV	Song	Happy	Strong	Kids	R1	A14	1	2	3	2	1	1	14	1	1	1	1	1	1	1	1	1	1
01-02-03-02-01-01-15.mp4	AV	Song	Happy	Strong	Kids	R1	A15	1	2	3	2	1	1	15	1	1	1	1	1	1	1	1	1	1
01-02-03-02-01-01-16.mp4	AV	Song	Happy	Strong	Kids	R1	A16	1	2	3	2	1	1	16	0	1	1	1	1	1	1	1	1	1
01-02-03-02-01-01-17.mp4	AV	Song	Happy	Strong	Kids	R1	A17	1	2	3	2	1	1	17	1	1	1	1	1	1	1	1	1	1
01-02-03-02-01-01-19.mp4	AV	Song	Happy	Strong	Kids	R1	A19	1	2	3	2	1	1	19	1	1	1	1	1	1	0	1	1	1
01-02-03-02-01-01-20.mp4	AV	Song	Happy	Strong	Kids	R1	A20	1	2	3	2	1	1	20	1	1	1	1	1	1	1	1	1	1
01-02-03-02-01-01-21.mp4	AV	Song	Happy	Strong	Kids	R1	A21	1	2	3	2	1	1	21	1	1	1	1	1	1	1	1	1	1
01-02-03-02-01-01-22.mp4	AV	Song	Happy	Strong	Kids	R1	A22	1	2	3	2	1	1	22	1	1	1	1	1	0	0	1	1	1
01-02-03-02-01-01-23.mp4	AV	Song	Happy	Strong	Kids	R1	A23	1	2	3	2	1	1	23	1	1	1	1	1	1	1	1	1	1
01-02-03-02-01-01-24.mp4	AV	Song	Happy	Strong	Kids	R1	A24	1	2	3	2	1	1	24	1	1	1	1	1	1	1	1	1	1
01-02-03-02-01-02-01.mp4	AV	Song	Happy	Strong	Kids	R2	A1	1	2	3	2	1	2	1	1	1	1	1	1	1	1	1	1	1
01-02-03-02-01-02-02.mp4	AV	Song	Happy	Strong	Kids	R2	A2	1	2	3	2	1	2	2	1	1	1	1	1	1	1	1	1	0
01-02-03-02-01-02-03.mp4	AV	Song	Happy	Strong	Kids	R2	A3	1	2	3	2	1	2	3	1	1	1	1	0	1	0	0	0	0
01-02-03-02-01-02-04.mp4	AV	Song	Happy	Strong	Kids	R2	A4	1	2	3	2	1	2	4	1	1	1	1	1	1	0	0	1	1
01-02-03-02-01-02-05.mp4	AV	Song	Happy	Strong	Kids	R2	A5	1	2	3	2	1	2	5	1	1	1	1	1	1	1	1	1	1
01-02-03-02-01-02-06.mp4	AV	Song	Happy	Strong	Kids	R2	A6	1	2	3	2	1	2	6	1	1	1	1	1	1	1	1	1	1
01-02-03-02-01-02-07.mp4	AV	Song	Happy	Strong	Kids	R2	A7	1	2	3	2	1	2	7	1	1	1	1	1	1	1	1	0	1
01-02-03-02-01-02-08.mp4	AV	Song	Happy	Strong	Kids	R2	A8	1	2	3	2	1	2	8	1	1	1	1	1	1	1	1	1	0
01-02-03-02-01-02-09.mp4	AV	Song	Happy	Strong	Kids	R2	A9	1	2	3	2	1	2	9	1	0	1	1	1	1	1	1	1	0
01-02-03-02-01-02-10.mp4	AV	Song	Happy	Strong	Kids	R2	A10	1	2	3	2	1	2	10	1	1	1	1	1	1	1	1	1	1
01-02-03-02-01-02-11.mp4	AV	Song	Happy	Strong	Kids	R2	A11	1	2	3	2	1	2	11	1	1	1	1	1	1	1	1	1	1
01-02-03-02-01-02-12.mp4	AV	Song	Happy	Strong	Kids	R2	A12	1	2	3	2	1	2	12	1	1	1	1	1	1	1	1	1	1
01-02-03-02-01-02-13.mp4	AV	Song	Happy	Strong	Kids	R2	A13	1	2	3	2	1	2	13	1	1	1	1	1	1	1	1	1	1
01-02-03-02-01-02-14.mp4	AV	Song	Happy	Strong	Kids	R2	A14	1	2	3	2	1	2	14	1	1	1	0	1	1	1	1	1	0
01-02-03-02-01-02-15.mp4	AV	Song	Happy	Strong	Kids	R2	A15	1	2	3	2	1	2	15	1	1	1	1	1	1	1	1	1	1
01-02-03-02-01-02-16.mp4	AV	Song	Happy	Strong	Kids	R2	A16	1	2	3	2	1	2	16	1	1	1	1	1	1	1	1	1	1
01-02-03-02-01-02-17.mp4	AV	Song	Happy	Strong	Kids	R2	A17	1	2	3	2	1	2	17	1	1	1	1	1	1	1	1	1	1
01-02-03-02-01-02-19.mp4	AV	Song	Happy	Strong	Kids	R2	A19	1	2	3	2	1	2	19	1	1	1	1	1	1	1	1	1	1
01-02-03-02-01-02-20.mp4	AV	Song	Happy	Strong	Kids	R2	A20	1	2	3	2	1	2	20	1	1	1	1	1	1	1	1	1	1
01-02-03-02-01-02-21.mp4	AV	Song	Happy	Strong	Kids	R2	A21	1	2	3	2	1	2	21	1	1	1	1	1	1	0	1	0	1
01-02-03-02-01-02-22.mp4	AV	Song	Happy	Strong	Kids	R2	A22	1	2	3	2	1	2	22	1	1	1	0	1	1	1	1	1	1
01-02-03-02-01-02-23.mp4	AV	Song	Happy	Strong	Kids	R2	A23	1	2	3	2	1	2	23	1	0	0	1	1	0	1	1	1	1
01-02-03-02-01-02-24.mp4	AV	Song	Happy	Strong	Kids	R2	A24	1	2	3	2	1	2	24	1	1	1	1	1	1	0	1	0	1
01-02-03-02-02-01-01.mp4	AV	Song	Happy	Strong	Dogs	R1	A1	1	2	3	2	2	1	1	1	1	1	1	1	1	1	1	1	1
01-02-03-02-02-01-02.mp4	AV	Song	Happy	Strong	Dogs	R1	A2	1	2	3	2	2	1	2	1	1	1	1	1	1	1	1	0	1
01-02-03-02-02-01-03.mp4	AV	Song	Happy	Strong	Dogs	R1	A3	1	2	3	2	2	1	3	1	1	1	1	0	1	1	0	1	1
01-02-03-02-02-01-04.mp4	AV	Song	Happy	Strong	Dogs	R1	A4	1	2	3	2	2	1	4	1	0	1	0	1	1	1	1	1	1
01-02-03-02-02-01-05.mp4	AV	Song	Happy	Strong	Dogs	R1	A5	1	2	3	2	2	1	5	1	1	0	1	1	1	1	1	1	1
01-02-03-02-02-01-06.mp4	AV	Song	Happy	Strong	Dogs	R1	A6	1	2	3	2	2	1	6	1	1	0	1	1	1	1	1	1	1
01-02-03-02-02-01-07.mp4	AV	Song	Happy	Strong	Dogs	R1	A7	1	2	3	2	2	1	7	1	1	1	1	1	1	1	1	1	1
01-02-03-02-02-01-08.mp4	AV	Song	Happy	Strong	Dogs	R1	A8	1	2	3	2	2	1	8	1	1	1	1	1	1	1	1	1	1
01-02-03-02-02-01-09.mp4	AV	Song	Happy	Strong	Dogs	R1	A9	1	2	3	2	2	1	9	1	1	1	1	1	0	1	1	1	1
01-02-03-02-02-01-10.mp4	AV	Song	Happy	Strong	Dogs	R1	A10	1	2	3	2	2	1	10	1	1	1	1	1	1	1	1	1	1
01-02-03-02-02-01-11.mp4	AV	Song	Happy	Strong	Dogs	R1	A11	1	2	3	2	2	1	11	1	1	1	1	1	1	1	1	1	1
01-02-03-02-02-01-12.mp4	AV	Song	Happy	Strong	Dogs	R1	A12	1	2	3	2	2	1	12	1	1	1	1	1	1	1	1	1	1
01-02-03-02-02-01-13.mp4	AV	Song	Happy	Strong	Dogs	R1	A13	1	2	3	2	2	1	13	1	1	1	1	1	1	1	1	1	1
01-02-03-02-02-01-14.mp4	AV	Song	Happy	Strong	Dogs	R1	A14	1	2	3	2	2	1	14	1	1	1	1	0	0	1	0	1	1
01-02-03-02-02-01-15.mp4	AV	Song	Happy	Strong	Dogs	R1	A15	1	2	3	2	2	1	15	1	1	1	1	1	1	1	1	1	1
01-02-03-02-02-01-16.mp4	AV	Song	Happy	Strong	Dogs	R1	A16	1	2	3	2	2	1	16	1	1	1	1	1	1	1	1	1	1
01-02-03-02-02-01-17.mp4	AV	Song	Happy	Strong	Dogs	R1	A17	1	2	3	2	2	1	17	1	1	0	1	0	0	1	0	1	1
01-02-03-02-02-01-19.mp4	AV	Song	Happy	Strong	Dogs	R1	A19	1	2	3	2	2	1	19	1	1	1	1	1	1	1	1	1	1
01-02-03-02-02-01-20.mp4	AV	Song	Happy	Strong	Dogs	R1	A20	1	2	3	2	2	1	20	1	1	1	1	1	1	1	1	1	1
01-02-03-02-02-01-21.mp4	AV	Song	Happy	Strong	Dogs	R1	A21	1	2	3	2	2	1	21	1	1	1	1	1	1	1	1	1	1
01-02-03-02-02-01-22.mp4	AV	Song	Happy	Strong	Dogs	R1	A22	1	2	3	2	2	1	22	1	1	1	1	1	1	1	1	1	1
01-02-03-02-02-01-23.mp4	AV	Song	Happy	Strong	Dogs	R1	A23	1	2	3	2	2	1	23	0	1	1	1	1	0	1	1	1	0
01-02-03-02-02-01-24.mp4	AV	Song	Happy	Strong	Dogs	R1	A24	1	2	3	2	2	1	24	1	1	1	1	1	1	1	1	1	1
01-02-03-02-02-02-01.mp4	AV	Song	Happy	Strong	Dogs	R2	A1	1	2	3	2	2	2	1	1	1	1	1	1	1	0	1	1	1
01-02-03-02-02-02-02.mp4	AV	Song	Happy	Strong	Dogs	R2	A2	1	2	3	2	2	2	2	1	1	1	1	1	1	1	1	1	1
01-02-03-02-02-02-03.mp4	AV	Song	Happy	Strong	Dogs	R2	A3	1	2	3	2	2	2	3	0	1	1	0	0	1	1	1	1	1
01-02-03-02-02-02-04.mp4	AV	Song	Happy	Strong	Dogs	R2	A4	1	2	3	2	2	2	4	1	1	1	1	1	1	1	1	1	1
01-02-03-02-02-02-05.mp4	AV	Song	Happy	Strong	Dogs	R2	A5	1	2	3	2	2	2	5	1	1	1	1	1	1	1	1	1	1
01-02-03-02-02-02-06.mp4	AV	Song	Happy	Strong	Dogs	R2	A6	1	2	3	2	2	2	6	1	1	1	1	1	1	1	1	1	0
01-02-03-02-02-02-07.mp4	AV	Song	Happy	Strong	Dogs	R2	A7	1	2	3	2	2	2	7	1	1	1	0	1	1	1	1	0	1
01-02-03-02-02-02-08.mp4	AV	Song	Happy	Strong	Dogs	R2	A8	1	2	3	2	2	2	8	1	1	1	1	1	1	1	1	1	1
01-02-03-02-02-02-09.mp4	AV	Song	Happy	Strong	Dogs	R2	A9	1	2	3	2	2	2	9	1	1	1	1	1	1	1	1	1	1
01-02-03-02-02-02-10.mp4	AV	Song	Happy	Strong	Dogs	R2	A10	1	2	3	2	2	2	10	1	1	1	1	1	1	1	1	1	1
01-02-03-02-02-02-11.mp4	AV	Song	Happy	Strong	Dogs	R2	A11	1	2	3	2	2	2	11	1	1	1	0	1	1	1	1	1	1
01-02-03-02-02-02-12.mp4	AV	Song	Happy	Strong	Dogs	R2	A12	1	2	3	2	2	2	12	1	1	0	1	1	1	1	1	1	1
01-02-03-02-02-02-13.mp4	AV	Song	Happy	Strong	Dogs	R2	A13	1	2	3	2	2	2	13	1	1	1	1	1	1	1	1	1	1
01-02-03-02-02-02-14.mp4	AV	Song	Happy	Strong	Dogs	R2	A14	1	2	3	2	2	2	14	1	1	1	1	1	1	1	1	1	1
01-02-03-02-02-02-15.mp4	AV	Song	Happy	Strong	Dogs	R2	A15	1	2	3	2	2	2	15	0	1	0	1	1	1	1	1	1	1
01-02-03-02-02-02-16.mp4	AV	Song	Happy	Strong	Dogs	R2	A16	1	2	3	2	2	2	16	1	1	1	1	1	1	1	1	1	1
01-02-03-02-02-02-17.mp4	AV	Song	Happy	Strong	Dogs	R2	A17	1	2	3	2	2	2	17	1	0	1	1	1	1	1	1	1	1
01-02-03-02-02-02-19.mp4	AV	Song	Happy	Strong	Dogs	R2	A19	1	2	3	2	2	2	19	1	1	1	1	1	1	1	1	1	1
01-02-03-02-02-02-20.mp4	AV	Song	Happy	Strong	Dogs	R2	A20	1	2	3	2	2	2	20	1	1	1	1	1	1	1	1	1	1
01-02-03-02-02-02-21.mp4	AV	Song	Happy	Strong	Dogs	R2	A21	1	2	3	2	2	2	21	1	1	1	1	1	1	1	1	1	0
01-02-03-02-02-02-22.mp4	AV	Song	Happy	Strong	Dogs	R2	A22	1	2	3	2	2	2	22	1	1	1	1	1	1	0	1	1	1
01-02-03-02-02-02-23.mp4	AV	Song	Happy	Strong	Dogs	R2	A23	1	2	3	2	2	2	23	1	1	1	1	1	1	1	1	1	0
01-02-03-02-02-02-24.mp4	AV	Song	Happy	Strong	Dogs	R2	A24	1	2	3	2	2	2	24	1	1	1	1	1	1	1	1	1	1
01-02-04-01-01-01-01.mp4	AV	Song	Sad	Normal	Kids	R1	A1	1	2	4	1	1	1	1	1	1	0	1	1	1	1	1	1	1
01-02-04-01-01-01-02.mp4	AV	Song	Sad	Normal	Kids	R1	A2	1	2	4	1	1	1	2	1	1	1	0	1	1	1	1	0	1
01-02-04-01-01-01-03.mp4	AV	Song	Sad	Normal	Kids	R1	A3	1	2	4	1	1	1	3	1	0	1	1	1	1	1	1	1	1
01-02-04-01-01-01-04.mp4	AV	Song	Sad	Normal	Kids	R1	A4	1	2	4	1	1	1	4	1	1	0	1	1	1	1	0	1	1
01-02-04-01-01-01-05.mp4	AV	Song	Sad	Normal	Kids	R1	A5	1	2	4	1	1	1	5	0	1	1	1	0	0	1	0	0	1
01-02-04-01-01-01-06.mp4	AV	Song	Sad	Normal	Kids	R1	A6	1	2	4	1	1	1	6	1	1	1	1	1	0	1	0	1	1
01-02-04-01-01-01-07.mp4	AV	Song	Sad	Normal	Kids	R1	A7	1	2	4	1	1	1	7	0	1	1	1	1	1	1	1	1	1
01-02-04-01-01-01-08.mp4	AV	Song	Sad	Normal	Kids	R1	A8	1	2	4	1	1	1	8	0	1	1	1	1	1	1	1	0	1
01-02-04-01-01-01-09.mp4	AV	Song	Sad	Normal	Kids	R1	A9	1	2	4	1	1	1	9	1	1	1	0	1	1	1	1	1	1
01-02-04-01-01-01-10.mp4	AV	Song	Sad	Normal	Kids	R1	A10	1	2	4	1	1	1	10	1	1	1	1	1	1	1	1	1	1
01-02-04-01-01-01-11.mp4	AV	Song	Sad	Normal	Kids	R1	A11	1	2	4	1	1	1	11	1	0	0	0	1	0	0	0	1	0
01-02-04-01-01-01-12.mp4	AV	Song	Sad	Normal	Kids	R1	A12	1	2	4	1	1	1	12	1	1	1	1	0	0	1	0	0	1
01-02-04-01-01-01-13.mp4	AV	Song	Sad	Normal	Kids	R1	A13	1	2	4	1	1	1	13	1	1	0	0	0	1	1	1	0	0
01-02-04-01-01-01-14.mp4	AV	Song	Sad	Normal	Kids	R1	A14	1	2	4	1	1	1	14	1	1	0	1	1	1	1	1	1	1
01-02-04-01-01-01-15.mp4	AV	Song	Sad	Normal	Kids	R1	A15	1	2	4	1	1	1	15	1	1	0	1	0	0	1	1	1	1
01-02-04-01-01-01-16.mp4	AV	Song	Sad	Normal	Kids	R1	A16	1	2	4	1	1	1	16	1	0	0	1	1	1	1	1	0	1
01-02-04-01-01-01-17.mp4	AV	Song	Sad	Normal	Kids	R1	A17	1	2	4	1	1	1	17	1	1	1	1	1	1	1	0	1	1
01-02-04-01-01-01-19.mp4	AV	Song	Sad	Normal	Kids	R1	A19	1	2	4	1	1	1	19	0	1	1	0	0	0	1	1	0	1
01-02-04-01-01-01-20.mp4	AV	Song	Sad	Normal	Kids	R1	A20	1	2	4	1	1	1	20	0	0	1	0	1	0	1	0	1	0
01-02-04-01-01-01-21.mp4	AV	Song	Sad	Normal	Kids	R1	A21	1	2	4	1	1	1	21	1	0	1	1	0	1	1	1	1	1
01-02-04-01-01-01-22.mp4	AV	Song	Sad	Normal	Kids	R1	A22	1	2	4	1	1	1	22	0	1	0	0	1	1	0	0	1	0
01-02-04-01-01-01-23.mp4	AV	Song	Sad	Normal	Kids	R1	A23	1	2	4	1	1	1	23	0	0	0	0	0	1	0	0	0	0
01-02-04-01-01-01-24.mp4	AV	Song	Sad	Normal	Kids	R1	A24	1	2	4	1	1	1	24	0	1	1	1	1	1	1	1	1	1
01-02-04-01-01-02-01.mp4	AV	Song	Sad	Normal	Kids	R2	A1	1	2	4	1	1	2	1	1	1	1	1	1	0	1	1	1	0
01-02-04-01-01-02-02.mp4	AV	Song	Sad	Normal	Kids	R2	A2	1	2	4	1	1	2	2	1	1	0	1	1	1	1	0	1	1
01-02-04-01-01-02-03.mp4	AV	Song	Sad	Normal	Kids	R2	A3	1	2	4	1	1	2	3	1	1	1	0	1	1	1	1	1	1
01-02-04-01-01-02-04.mp4	AV	Song	Sad	Normal	Kids	R2	A4	1	2	4	1	1	2	4	0	1	1	1	0	1	1	1	1	1
01-02-04-01-01-02-05.mp4	AV	Song	Sad	Normal	Kids	R2	A5	1	2	4	1	1	2	5	1	0	1	1	1	0	1	1	0	1
01-02-04-01-01-02-06.mp4	AV	Song	Sad	Normal	Kids	R2	A6	1	2	4	1	1	2	6	1	1	1	1	1	1	1	1	1	1
01-02-04-01-01-02-07.mp4	AV	Song	Sad	Normal	Kids	R2	A7	1	2	4	1	1	2	7	1	1	1	1	1	1	1	1	1	1
01-02-04-01-01-02-08.mp4	AV	Song	Sad	Normal	Kids	R2	A8	1	2	4	1	1	2	8	0	1	1	1	1	1	1	1	0	1
01-02-04-01-01-02-09.mp4	AV	Song	Sad	Normal	Kids	R2	A9	1	2	4	1	1	2	9	0	1	0	1	1	1	0	1	0	1
01-02-04-01-01-02-10.mp4	AV	Song	Sad	Normal	Kids	R2	A10	1	2	4	1	1	2	10	1	1	1	1	1	1	1	1	1	1
01-02-04-01-01-02-11.mp4	AV	Song	Sad	Normal	Kids	R2	A11	1	2	4	1	1	2	11	0	0	1	0	1	1	0	1	0	0
01-02-04-01-01-02-12.mp4	AV	Song	Sad	Normal	Kids	R2	A12	1	2	4	1	1	2	12	1	0	1	1	1	1	1	1	1	1
01-02-04-01-01-02-13.mp4	AV	Song	Sad	Normal	Kids	R2	A13	1	2	4	1	1	2	13	0	0	1	0	1	0	0	1	1	0
01-02-04-01-01-02-14.mp4	AV	Song	Sad	Normal	Kids	R2	A14	1	2	4	1	1	2	14	1	1	1	0	0	0	1	1	1	0
01-02-04-01-01-02-15.mp4	AV	Song	Sad	Normal	Kids	R2	A15	1	2	4	1	1	2	15	1	1	1	1	1	1	1	0	1	1
01-02-04-01-01-02-16.mp4	AV	Song	Sad	Normal	Kids	R2	A16	1	2	4	1	1	2	16	0	0	0	1	0	0	0	0	1	0
01-02-04-01-01-02-17.mp4	AV	Song	Sad	Normal	Kids	R2	A17	1	2	4	1	1	2	17	1	1	1	1	1	0	0	1	1	1
01-02-04-01-01-02-19.mp4	AV	Song	Sad	Normal	Kids	R2	A19	1	2	4	1	1	2	19	1	1	0	1	1	1	1	1	1	1
01-02-04-01-01-02-20.mp4	AV	Song	Sad	Normal	Kids	R2	A20	1	2	4	1	1	2	20	1	1	0	1	1	0	0	1	1	0
01-02-04-01-01-02-21.mp4	AV	Song	Sad	Normal	Kids	R2	A21	1	2	4	1	1	2	21	1	1	1	1	1	0	1	1	1	1
01-02-04-01-01-02-22.mp4	AV	Song	Sad	Normal	Kids	R2	A22	1	2	4	1	1	2	22	0	0	0	1	1	1	1	0	0	1
01-02-04-01-01-02-23.mp4	AV	Song	Sad	Normal	Kids	R2	A23	1	2	4	1	1	2	23	0	0	0	0	0	0	0	0	0	1
01-02-04-01-01-02-24.mp4	AV	Song	Sad	Normal	Kids	R2	A24	1	2	4	1	1	2	24	0	1	1	1	1	1	1	1	1	1
01-02-04-01-02-01-01.mp4	AV	Song	Sad	Normal	Dogs	R1	A1	1	2	4	1	2	1	1	1	1	0	1	1	0	1	1	1	0
01-02-04-01-02-01-02.mp4	AV	Song	Sad	Normal	Dogs	R1	A2	1	2	4	1	2	1	2	1	1	1	0	1	0	1	1	1	1
01-02-04-01-02-01-03.mp4	AV	Song	Sad	Normal	Dogs	R1	A3	1	2	4	1	2	1	3	1	1	1	1	1	1	1	1	1	1
01-02-04-01-02-01-04.mp4	AV	Song	Sad	Normal	Dogs	R1	A4	1	2	4	1	2	1	4	1	0	1	0	1	1	1	0	1	0
01-02-04-01-02-01-05.mp4	AV	Song	Sad	Normal	Dogs	R1	A5	1	2	4	1	2	1	5	0	1	1	0	1	1	1	1	1	1
01-02-04-01-02-01-06.mp4	AV	Song	Sad	Normal	Dogs	R1	A6	1	2	4	1	2	1	6	1	1	1	1	0	1	1	1	1	0
01-02-04-01-02-01-07.mp4	AV	Song	Sad	Normal	Dogs	R1	A7	1	2	4	1	2	1	7	1	1	1	1	1	1	1	1	1	1
01-02-04-01-02-01-08.mp4	AV	Song	Sad	Normal	Dogs	R1	A8	1	2	4	1	2	1	8	1	1	1	1	1	1	1	1	1	1
01-02-04-01-02-01-09.mp4	AV	Song	Sad	Normal	Dogs	R1	A9	1	2	4	1	2	1	9	1	1	1	1	1	1	1	1	1	1
01-02-04-01-02-01-10.mp4	AV	Song	Sad	Normal	Dogs	R1	A10	1	2	4	1	2	1	10	1	1	1	1	1	1	1	1	1	1
01-02-04-01-02-01-11.mp4	AV	Song	Sad	Normal	Dogs	R1	A11	1	2	4	1	2	1	11	0	1	0	0	1	1	0	1	1	1
01-02-04-01-02-01-12.mp4	AV	Song	Sad	Normal	Dogs	R1	A12	1	2	4	1	2	1	12	0	0	1	1	1	1	1	1	1	1
01-02-04-01-02-01-13.mp4	AV	Song	Sad	Normal	Dogs	R1	A13	1	2	4	1	2	1	13	1	1	1	1	1	1	1	1	0	0
01-02-04-01-02-01-14.mp4	AV	Song	Sad	Normal	Dogs	R1	A14	1	2	4	1	2	1	14	0	1	0	1	1	0	0	1	0	1
01-02-04-01-02-01-15.mp4	AV	Song	Sad	Normal	Dogs	R1	A15	1	2	4	1	2	1	15	1	0	1	1	1	1	0	1	1	0
01-02-04-01-02-01-16.mp4	AV	Song	Sad	Normal	Dogs	R1	A16	1	2	4	1	2	1	16	1	1	1	1	1	0	1	1	0	0
01-02-04-01-02-01-17.mp4	AV	Song	Sad	Normal	Dogs	R1	A17	1	2	4	1	2	1	17	1	1	1	1	1	1	1	1	1	0
01-02-04-01-02-01-19.mp4	AV	Song	Sad	Normal	Dogs	R1	A19	1	2	4	1	2	1	19	1	1	1	0	1	1	1	1	1	0
01-02-04-01-02-01-20.mp4	AV	Song	Sad	Normal	Dogs	R1	A20	1	2	4	1	2	1	20	1	1	0	1	1	0	1	1	1	1
01-02-04-01-02-01-21.mp4	AV	Song	Sad	Normal	Dogs	R1	A21	1	2	4	1	2	1	21	1	1	1	0	0	1	1	1	0	0
01-02-04-01-02-01-22.mp4	AV	Song	Sad	Normal	Dogs	R1	A22	1	2	4	1	2	1	22	1	1	1	1	0	1	1	1	1	1
01-02-04-01-02-01-23.mp4	AV	Song	Sad	Normal	Dogs	R1	A23	1	2	4	1	2	1	23	0	0	1	0	1	0	0	0	0	1
01-02-04-01-02-01-24.mp4	AV	Song	Sad	Normal	Dogs	R1	A24	1	2	4	1	2	1	24	1	1	1	1	1	1	1	1	1	1
01-02-04-01-02-02-01.mp4	AV	Song	Sad	Normal	Dogs	R2	A1	1	2	4	1	2	2	1	1	1	1	1	1	1	1	1	1	0
01-02-04-01-02-02-02.mp4	AV	Song	Sad	Normal	Dogs	R2	A2	1	2	4	1	2	2	2	1	1	0	1	1	1	1	1	1	1
01-02-04-01-02-02-03.mp4	AV	Song	Sad	Normal	Dogs	R2	A3	1	2	4	1	2	2	3	1	1	1	1	1	1	1	0	1	1
01-02-04-01-02-02-04.mp4	AV	Song	Sad	Normal	Dogs	R2	A4	1	2	4	1	2	2	4	1	1	1	0	1	0	1	1	1	1
01-02-04-01-02-02-05.mp4	AV	Song	Sad	Normal	Dogs	R2	A5	1	2	4	1	2	2	5	1	0	1	0	1	1	1	1	1	1
01-02-04-01-02-02-06.mp4	AV	Song	Sad	Normal	Dogs	R2	A6	1	2	4	1	2	2	6	1	1	1	1	1	1	1	0	1	1
01-02-04-01-02-02-07.mp4	AV	Song	Sad	Normal	Dogs	R2	A7	1	2	4	1	2	2	7	1	1	1	1	1	1	1	1	1	1
01-02-04-01-02-02-08.mp4	AV	Song	Sad	Normal	Dogs	R2	A8	1	2	4	1	2	2	8	1	1	1	1	1	1	1	0	1	1
01-02-04-01-02-02-09.mp4	AV	Song	Sad	Normal	Dogs	R2	A9	1	2	4	1	2	2	9	0	0	1	0	1	1	1	0	1	0
01-02-04-01-02-02-10.mp4	AV	Song	Sad	Normal	Dogs	R2	A10	1	2	4	1	2	2	10	1	1	1	1	1	1	1	1	1	1
01-02-04-01-02-02-11.mp4	AV	Song	Sad	Normal	Dogs	R2	A11	1	2	4	1	2	2	11	1	1	1	1	1	0	1	0	1	0
01-02-04-01-02-02-12.mp4	AV	Song	Sad	Normal	Dogs	R2	A12	1	2	4	1	2	2	12	1	1	1	1	1	1	0	0	1	1
01-02-04-01-02-02-13.mp4	AV	Song	Sad	Normal	Dogs	R2	A13	1	2	4	1	2	2	13	1	1	1	1	1	0	1	1	0	1
01-02-04-01-02-02-14.mp4	AV	Song	Sad	Normal	Dogs	R2	A14	1	2	4	1	2	2	14	1	0	1	0	1	1	0	0	0	1
01-02-04-01-02-02-15.mp4	AV	Song	Sad	Normal	Dogs	R2	A15	1	2	4	1	2	2	15	1	1	0	0	0	1	1	1	0	1
01-02-04-01-02-02-16.mp4	AV	Song	Sad	Normal	Dogs	R2	A16	1	2	4	1	2	2	16	1	1	1	1	1	1	0	1	1	0
01-02-04-01-02-02-17.mp4	AV	Song	Sad	Normal	Dogs	R2	A17	1	2	4	1	2	2	17	1	1	1	1	1	1	1	1	0	1
01-02-04-01-02-02-19.mp4	AV	Song	Sad	Normal	Dogs	R2	A19	1	2	4	1	2	2	19	1	1	1	1	0	1	0	1	1	1
01-02-04-01-02-02-20.mp4	AV	Song	Sad	Normal	Dogs	R2	A20	1	2	4	1	2	2	20	0	0	0	0	0	0	1	0	0	0
01-02-04-01-02-02-21.mp4	AV	Song	Sad	Normal	Dogs	R2	A21	1	2	4	1	2	2	21	1	1	1	1	1	1	1	1	1	1
01-02-04-01-02-02-22.mp4	AV	Song	Sad	Normal	Dogs	R2	A22	1	2	4	1	2	2	22	1	1	0	0	1	1	0	1	0	1
01-02-04-01-02-02-23.mp4	AV	Song	Sad	Normal	Dogs	R2	A23	1	2	4	1	2	2	23	0	0	0	0	0	0	0	0	0	0
01-02-04-01-02-02-24.mp4	AV	Song	Sad	Normal	Dogs	R2	A24	1	2	4	1	2	2	24	0	0	0	0	0	1	1	1	0	0
01-02-04-02-01-01-01.mp4	AV	Song	Sad	Strong	Kids	R1	A1	1	2	4	2	1	1	1	1	1	1	1	1	1	1	1	0	1
01-02-04-02-01-01-02.mp4	AV	Song	Sad	Strong	Kids	R1	A2	1	2	4	2	1	1	2	1	1	1	1	1	1	1	1	1	0
01-02-04-02-01-01-03.mp4	AV	Song	Sad	Strong	Kids	R1	A3	1	2	4	2	1	1	3	1	1	1	1	1	1	1	1	1	1
01-02-04-02-01-01-04.mp4	AV	Song	Sad	Strong	Kids	R1	A4	1	2	4	2	1	1	4	0	0	1	0	1	0	1	0	0	1
01-02-04-02-01-01-05.mp4	AV	Song	Sad	Strong	Kids	R1	A5	1	2	4	2	1	1	5	1	1	1	1	1	1	1	1	1	1
01-02-04-02-01-01-06.mp4	AV	Song	Sad	Strong	Kids	R1	A6	1	2	4	2	1	1	6	1	1	1	1	1	1	1	1	1	1
01-02-04-02-01-01-07.mp4	AV	Song	Sad	Strong	Kids	R1	A7	1	2	4	2	1	1	7	1	1	1	1	1	1	1	1	1	1
01-02-04-02-01-01-08.mp4	AV	Song	Sad	Strong	Kids	R1	A8	1	2	4	2	1	1	8	1	0	1	1	1	1	1	1	1	1
01-02-04-02-01-01-09.mp4	AV	Song	Sad	Strong	Kids	R1	A9	1	2	4	2	1	1	9	1	0	1	1	1	1	0	1	1	1
01-02-04-02-01-01-10.mp4	AV	Song	Sad	Strong	Kids	R1	A10	1	2	4	2	1	1	10	1	1	1	1	1	1	1	1	1	1
01-02-04-02-01-01-11.mp4	AV	Song	Sad	Strong	Kids	R1	A11	1	2	4	2	1	1	11	1	0	1	1	1	1	0	1	1	1
01-02-04-02-01-01-12.mp4	AV	Song	Sad	Strong	Kids	R1	A12	1	2	4	2	1	1	12	1	0	1	1	1	1	0	1	1	1
01-02-04-02-01-01-13.mp4	AV	Song	Sad	Strong	Kids	R1	A13	1	2	4	2	1	1	13	0	0	0	1	1	1	1	1	1	1
01-02-04-02-01-01-14.mp4	AV	Song	Sad	Strong	Kids	R1	A14	1	2	4	2	1	1	14	1	1	1	0	0	0	1	0	1	0
01-02-04-02-01-01-15.mp4	AV	Song	Sad	Strong	Kids	R1	A15	1	2	4	2	1	1	15	1	1	1	1	1	1	1	1	1	1
01-02-04-02-01-01-16.mp4	AV	Song	Sad	Strong	Kids	R1	A16	1	2	4	2	1	1	16	1	1	1	1	1	1	1	1	1	1
01-02-04-02-01-01-17.mp4	AV	Song	Sad	Strong	Kids	R1	A17	1	2	4	2	1	1	17	1	1	1	1	1	1	1	0	1	1
01-02-04-02-01-01-19.mp4	AV	Song	Sad	Strong	Kids	R1	A19	1	2	4	2	1	1	19	0	1	1	1	1	1	1	1	1	1
01-02-04-02-01-01-20.mp4	AV	Song	Sad	Strong	Kids	R1	A20	1	2	4	2	1	1	20	1	1	1	1	1	1	1	1	1	1
01-02-04-02-01-01-21.mp4	AV	Song	Sad	Strong	Kids	R1	A21	1	2	4	2	1	1	21	1	1	1	1	1	1	1	1	1	1
01-02-04-02-01-01-22.mp4	AV	Song	Sad	Strong	Kids	R1	A22	1	2	4	2	1	1	22	1	0	1	1	0	1	1	1	1	1
01-02-04-02-01-01-23.mp4	AV	Song	Sad	Strong	Kids	R1	A23	1	2	4	2	1	1	23	1	1	1	1	0	1	1	1	0	0
01-02-04-02-01-01-24.mp4	AV	Song	Sad	Strong	Kids	R1	A24	1	2	4	2	1	1	24	1	1	1	1	1	1	1	1	1	1
01-02-04-02-01-02-01.mp4	AV	Song	Sad	Strong	Kids	R2	A1	1	2	4	2	1	2	1	1	1	1	1	1	0	1	1	1	1
01-02-04-02-01-02-02.mp4	AV	Song	Sad	Strong	Kids	R2	A2	1	2	4	2	1	2	2	0	1	1	1	1	1	1	1	1	0
01-02-04-02-01-02-03.mp4	AV	Song	Sad	Strong	Kids	R2	A3	1	2	4	2	1	2	3	1	1	1	1	1	1	1	1	1	1
01-02-04-02-01-02-04.mp4	AV	Song	Sad	Strong	Kids	R2	A4	1	2	4	2	1	2	4	1	0	1	1	1	1	0	1	1	1
01-02-04-02-01-02-05.mp4	AV	Song	Sad	Strong	Kids	R2	A5	1	2	4	2	1	2	5	1	1	1	1	1	1	1	1	1	1
01-02-04-02-01-02-06.mp4	AV	Song	Sad	Strong	Kids	R2	A6	1	2	4	2	1	2	6	1	0	1	1	1	1	1	1	1	1
01-02-04-02-01-02-07.mp4	AV	Song	Sad	Strong	Kids	R2	A7	1	2	4	2	1	2	7	1	1	1	1	1	1	1	1	1	1
01-02-04-02-01-02-08.mp4	AV	Song	Sad	Strong	Kids	R2	A8	1	2	4	2	1	2	8	1	1	1	1	1	1	1	1	1	1
01-02-04-02-01-02-09.mp4	AV	Song	Sad	Strong	Kids	R2	A9	1	2	4	2	1	2	9	1	1	1	1	1	1	1	1	1	1
01-02-04-02-01-02-10.mp4	AV	Song	Sad	Strong	Kids	R2	A10	1	2	4	2	1	2	10	1	1	1	0	1	1	1	1	1	0
01-02-04-02-01-02-11.mp4	AV	Song	Sad	Strong	Kids	R2	A11	1	2	4	2	1	2	11	0	1	1	1	1	1	0	1	1	1
01-02-04-02-01-02-12.mp4	AV	Song	Sad	Strong	Kids	R2	A12	1	2	4	2	1	2	12	1	1	0	1	1	1	0	1	1	1
01-02-04-02-01-02-13.mp4	AV	Song	Sad	Strong	Kids	R2	A13	1	2	4	2	1	2	13	1	1	1	1	1	1	0	0	0	1
01-02-04-02-01-02-14.mp4	AV	Song	Sad	Strong	Kids	R2	A14	1	2	4	2	1	2	14	1	1	1	1	1	1	1	1	0	1
01-02-04-02-01-02-15.mp4	AV	Song	Sad	Strong	Kids	R2	A15	1	2	4	2	1	2	15	1	1	0	1	0	0	0	0	1	1
01-02-04-02-01-02-16.mp4	AV	Song	Sad	Strong	Kids	R2	A16	1	2	4	2	1	2	16	1	0	0	1	1	1	0	0	1	1
01-02-04-02-01-02-17.mp4	AV	Song	Sad	Strong	Kids	R2	A17	1	2	4	2	1	2	17	1	1	0	1	1	1	1	1	0	1
01-02-04-02-01-02-19.mp4	AV	Song	Sad	Strong	Kids	R2	A19	1	2	4	2	1	2	19	1	1	1	0	1	1	1	1	1	1
01-02-04-02-01-02-20.mp4	AV	Song	Sad	Strong	Kids	R2	A20	1	2	4	2	1	2	20	1	1	1	1	1	1	0	1	1	1
01-02-04-02-01-02-21.mp4	AV	Song	Sad	Strong	Kids	R2	A21	1	2	4	2	1	2	21	1	1	1	1	0	1	1	1	1	1
01-02-04-02-01-02-22.mp4	AV	Song	Sad	Strong	Kids	R2	A22	1	2	4	2	1	2	22	1	1	1	1	1	1	1	1	1	0
01-02-04-02-01-02-23.mp4	AV	Song	Sad	Strong	Kids	R2	A23	1	2	4	2	1	2	23	0	1	0	0	0	0	1	0	1	0
01-02-04-02-01-02-24.mp4	AV	Song	Sad	Strong	Kids	R2	A24	1	2	4	2	1	2	24	1	1	1	1	1	1	1	1	1	1
01-02-04-02-02-01-01.mp4	AV	Song	Sad	Strong	Dogs	R1	A1	1	2	4	2	2	1	1	1	1	1	1	0	1	1	1	0	1
01-02-04-02-02-01-02.mp4	AV	Song	Sad	Strong	Dogs	R1	A2	1	2	4	2	2	1	2	1	1	1	1	0	1	1	1	1	1
01-02-04-02-02-01-03.mp4	AV	Song	Sad	Strong	Dogs	R1	A3	1	2	4	2	2	1	3	1	1	1	1	1	1	1	1	1	1
01-02-04-02-02-01-04.mp4	AV	Song	Sad	Strong	Dogs	R1	A4	1	2	4	2	2	1	4	1	1	1	1	1	1	0	1	1	0
01-02-04-02-02-01-05.mp4	AV	Song	Sad	Strong	Dogs	R1	A5	1	2	4	2	2	1	5	1	1	1	1	1	1	1	1	0	1
01-02-04-02-02-01-06.mp4	AV	Song	Sad	Strong	Dogs	R1	A6	1	2	4	2	2	1	6	1	1	1	1	1	1	0	1	1	1
01-02-04-02-02-01-07.mp4	AV	Song	Sad	Strong	Dogs	R1	A7	1	2	4	2	2	1	7	1	1	1	1	1	1	1	1	1	1
01-02-04-02-02-01-08.mp4	AV	Song	Sad	Strong	Dogs	R1	A8	1	2	4	2	2	1	8	1	1	1	1	1	1	1	1	1	1
01-02-04-02-02-01-09.mp4	AV	Song	Sad	Strong	Dogs	R1	A9	1	2	4	2	2	1	9	1	1	1	1	1	1	1	1	1	1
01-02-04-02-02-01-10.mp4	AV	Song	Sad	Strong	Dogs	R1	A10	1	2	4	2	2	1	10	1	1	1	1	1	1	1	1	1	0
01-02-04-02-02-01-11.mp4	AV	Song	Sad	Strong	Dogs	R1	A11	1	2	4	2	2	1	11	1	1	0	1	1	0	1	1	1	1
01-02-04-02-02-01-12.mp4	AV	Song	Sad	Strong	Dogs	R1	A12	1	2	4	2	2	1	12	0	0	1	1	1	1	1	0	1	1
01-02-04-02-02-01-13.mp4	AV	Song	Sad	Strong	Dogs	R1	A13	1	2	4	2	2	1	13	1	0	1	1	0	1	1	0	1	0
01-02-04-02-02-01-14.mp4	AV	Song	Sad	Strong	Dogs	R1	A14	1	2	4	2	2	1	14	1	0	0	1	0	1	0	1	0	1
01-02-04-02-02-01-15.mp4	AV	Song	Sad	Strong	Dogs	R1	A15	1	2	4	2	2	1	15	1	1	1	1	1	1	1	1	1	1
01-02-04-02-02-01-16.mp4	AV	Song	Sad	Strong	Dogs	R1	A16	1	2	4	2	2	1	16	0	1	1	1	1	1	1	1	1	0
01-02-04-02-02-01-17.mp4	AV	Song	Sad	Strong	Dogs	R1	A17	1	2	4	2	2	1	17	1	1	1	1	1	1	1	1	1	1
01-02-04-02-02-01-19.mp4	AV	Song	Sad	Strong	Dogs	R1	A19	1	2	4	2	2	1	19	1	1	1	1	1	1	1	0	1	1
01-02-04-02-02-01-20.mp4	AV	Song	Sad	Strong	Dogs	R1	A20	1	2	4	2	2	1	20	1	1	0	1	0	1	1	0	0	1
01-02-04-02-02-01-21.mp4	AV	Song	Sad	Strong	Dogs	R1	A21	1	2	4	2	2	1	21	1	0	1	1	1	1	1	1	0	1
01-02-04-02-02-01-22.mp4	AV	Song	Sad	Strong	Dogs	R1	A22	1	2	4	2	2	1	22	0	0	1	1	0	1	1	0	1	0
01-02-04-02-02-01-23.mp4	AV	Song	Sad	Strong	Dogs	R1	A23	1	2	4	2	2	1	23	1	1	0	0	1	1	0	0	1	1
01-02-04-02-02-01-24.mp4	AV	Song	Sad	Strong	Dogs	R1	A24	1	2	4	2	2	1	24	1	1	1	1	1	1	1	1	1	1
01-02-04-02-02-02-01.mp4	AV	Song	Sad	Strong	Dogs	R2	A1	1	2	4	2	2	2	1	1	1	1	1	1	1	1	1	1	1
01-02-04-02-02-02-02.mp4	AV	Song	Sad	Strong	Dogs	R2	A2	1	2	4	2	2	2	2	1	1	1	1	1	1	1	0	1	1
01-02-04-02-02-02-03.mp4	AV	Song	Sad	Strong	Dogs	R2	A3	1	2	4	2	2	2	3	1	1	1	1	1	1	1	1	1	1
01-02-04-02-02-02-04.mp4	AV	Song	Sad	Strong	Dogs	R2	A4	1	2	4	2	2	2	4	1	0	1	0	1	1	1	1	1	1
01-02-04-02-02-02-05.mp4	AV	Song	Sad	Strong	Dogs	R2	A5	1	2	4	2	2	2	5	1	1	1	1	1	1	1	1	1	1
01-02-04-02-02-02-06.mp4	AV	Song	Sad	Strong	Dogs	R2	A6	1	2	4	2	2	2	6	1	1	1	1	1	1	1	1	1	1
01-02-04-02-02-02-07.mp4	AV	Song	Sad	Strong	Dogs	R2	A7	1	2	4	2	2	2	7	1	1	1	1	1	1	1	1	1	1
01-02-04-02-02-02-08.mp4	AV	Song	Sad	Strong	Dogs	R2	A8	1	2	4	2	2	2	8	1	1	1	1	1	1	1	1	1	1
01-02-04-02-02-02-09.mp4	AV	Song	Sad	Strong	Dogs	R2	A9	1	2	4	2	2	2	9	1	1	1	1	1	1	1	0	1	0
01-02-04-02-02-02-10.mp4	AV	Song	Sad	Strong	Dogs	R2	A10	1	2	4	2	2	2	10	1	1	1	1	1	1	1	1	1	1
01-02-04-02-02-02-11.mp4	AV	Song	Sad	Strong	Dogs	R2	A11	1	2	4	2	2	2	11	1	1	1	1	1	1	1	1	0	1
01-02-04-02-02-02-12.mp4	AV	Song	Sad	Strong	Dogs	R2	A12	1	2	4	2	2	2	12	1	0	1	0	0	1	1	1	1	1
01-02-04-02-02-02-13.mp4	AV	Song	Sad	Strong	Dogs	R2	A13	1	2	4	2	2	2	13	1	0	1	1	1	0	0	1	0	1
01-02-04-02-02-02-14.mp4	AV	Song	Sad	Strong	Dogs	R2	A14	1	2	4	2	2	2	14	0	0	1	0	1	0	0	0	1	1
01-02-04-02-02-02-15.mp4	AV	Song	Sad	Strong	Dogs	R2	A15	1	2	4	2	2	2	15	1	1	1	1	1	0	0	1	1	1
01-02-04-02-02-02-16.mp4	AV	Song	Sad	Strong	Dogs	R2	A16	1	2	4	2	2	2	16	1	1	1	1	1	1	1	1	1	1
01-02-04-02-02-02-17.mp4	AV	Song	Sad	Strong	Dogs	R2	A17	1	2	4	2	2	2	17	1	1	1	1	1	1	1	1	1	1
01-02-04-02-02-02-19.mp4	AV	Song	Sad	Strong	Dogs	R2	A19	1	2	4	2	2	2	19	1	1	1	1	1	1	1	1	1	1
01-02-04-02-02-02-20.mp4	AV	Song	Sad	Strong	Dogs	R2	A20	1	2	4	2	2	2	20	1	1	0	0	1	0	0	1	1	1
01-02-04-02-02-02-21.mp4	AV	Song	Sad	Strong	Dogs	R2	A21	1	2	4	2	2	2	21	1	1	1	1	1	1	1	1	1	1
01-02-04-02-02-02-22.mp4	AV	Song	Sad	Strong	Dogs	R2	A22	1	2	4	2	2	2	22	0	1	1	1	1	1	1	0	1	1
01-02-04-02-02-02-23.mp4	AV	Song	Sad	Strong	Dogs	R2	A23	1	2	4	2	2	2	23	1	0	0	1	0	1	0	0	0	1
01-02-04-02-02-02-24.mp4	AV	Song	Sad	Strong	Dogs	R2	A24	1	2	4	2	2	2	24	1	1	1	1	1	1	1	1	1	1
01-02-05-01-01-01-01.mp4	AV	Song	Angry	Normal	Kids	R1	A1	1	2	5	1	1	1	1	1	1	1	1	1	1	1	1	1	1
01-02-05-01-01-01-02.mp4	AV	Song	Angry	Normal	Kids	R1	A2	1	2	5	1	1	1	2	1	1	1	1	1	1	0	1	1	1
01-02-05-01-01-01-03.mp4	AV	Song	Angry	Normal	Kids	R1	A3	1	2	5	1	1	1	3	1	1	1	1	1	1	1	1	1	1
01-02-05-01-01-01-04.mp4	AV	Song	Angry	Normal	Kids	R1	A4	1	2	5	1	1	1	4	1	1	1	0	1	0	1	1	1	0
01-02-05-01-01-01-05.mp4	AV	Song	Angry	Normal	Kids	R1	A5	1	2	5	1	1	1	5	0	1	1	0	0	1	1	1	1	1
01-02-05-01-01-01-06.mp4	AV	Song	Angry	Normal	Kids	R1	A6	1	2	5	1	1	1	6	1	1	1	1	1	1	0	1	1	1
01-02-05-01-01-01-07.mp4	AV	Song	Angry	Normal	Kids	R1	A7	1	2	5	1	1	1	7	1	1	1	1	1	1	1	1	1	1
01-02-05-01-01-01-08.mp4	AV	Song	Angry	Normal	Kids	R1	A8	1	2	5	1	1	1	8	1	1	1	1	1	1	1	1	1	1
01-02-05-01-01-01-09.mp4	AV	Song	Angry	Normal	Kids	R1	A9	1	2	5	1	1	1	9	1	1	1	1	1	1	1	1	1	1
01-02-05-01-01-01-10.mp4	AV	Song	Angry	Normal	Kids	R1	A10	1	2	5	1	1	1	10	1	1	1	1	1	1	1	1	1	1
01-02-05-01-01-01-11.mp4	AV	Song	Angry	Normal	Kids	R1	A11	1	2	5	1	1	1	11	1	0	1	1	1	0	1	1	0	0
01-02-05-01-01-01-12.mp4	AV	Song	Angry	Normal	Kids	R1	A12	1	2	5	1	1	1	12	1	1	1	1	1	1	1	1	1	0
01-02-05-01-01-01-13.mp4	AV	Song	Angry	Normal	Kids	R1	A13	1	2	5	1	1	1	13	0	1	1	1	1	1	1	1	1	1
01-02-05-01-01-01-14.mp4	AV	Song	Angry	Normal	Kids	R1	A14	1	2	5	1	1	1	14	1	1	1	1	0	1	1	1	1	1
01-02-05-01-01-01-15.mp4	AV	Song	Angry	Normal	Kids	R1	A15	1	2	5	1	1	1	15	1	1	1	1	1	1	1	1	1	1
01-02-05-01-01-01-16.mp4	AV	Song	Angry	Normal	Kids	R1	A16	1	2	5	1	1	1	16	1	1	1	1	1	1	1	1	1	1
01-02-05-01-01-01-17.mp4	AV	Song	Angry	Normal	Kids	R1	A17	1	2	5	1	1	1	17	1	1	1	1	1	0	1	1	1	1
01-02-05-01-01-01-19.mp4	AV	Song	Angry	Normal	Kids	R1	A19	1	2	5	1	1	1	19	1	1	1	1	1	1	1	1	1	1
01-02-05-01-01-01-20.mp4	AV	Song	Angry	Normal	Kids	R1	A20	1	2	5	1	1	1	20	1	1	1	1	1	1	1	1	1	1
01-02-05-01-01-01-21.mp4	AV	Song	Angry	Normal	Kids	R1	A21	1	2	5	1	1	1	21	1	1	1	1	1	1	1	1	1	1
01-02-05-01-01-01-22.mp4	AV	Song	Angry	Normal	Kids	R1	A22	1	2	5	1	1	1	22	0	1	1	1	1	0	1	1	1	1
01-02-05-01-01-01-23.mp4	AV	Song	Angry	Normal	Kids	R1	A23	1	2	5	1	1	1	23	0	1	1	1	1	1	1	1	1	1
01-02-05-01-01-01-24.mp4	AV	Song	Angry	Normal	Kids	R1	A24	1	2	5	1	1	1	24	1	1	1	1	1	1	1	1	0	1
01-02-05-01-01-02-01.mp4	AV	Song	Angry	Normal	Kids	R2	A1	1	2	5	1	1	2	1	1	1	0	1	1	1	1	1	1	1
01-02-05-01-01-02-02.mp4	AV	Song	Angry	Normal	Kids	R2	A2	1	2	5	1	1	2	2	1	1	1	1	0	1	1	1	1	0
01-02-05-01-01-02-03.mp4	AV	Song	Angry	Normal	Kids	R2	A3	1	2	5	1	1	2	3	1	1	1	1	1	1	1	1	1	1
01-02-05-01-01-02-04.mp4	AV	Song	Angry	Normal	Kids	R2	A4	1	2	5	1	1	2	4	1	1	1	1	1	1	1	1	1	1
01-02-05-01-01-02-05.mp4	AV	Song	Angry	Normal	Kids	R2	A5	1	2	5	1	1	2	5	1	1	1	1	0	1	1	1	1	0
01-02-05-01-01-02-06.mp4	AV	Song	Angry	Normal	Kids	R2	A6	1	2	5	1	1	2	6	1	1	1	1	1	1	1	1	1	1
01-02-05-01-01-02-07.mp4	AV	Song	Angry	Normal	Kids	R2	A7	1	2	5	1	1	2	7	1	1	0	1	1	1	1	1	1	1
01-02-05-01-01-02-08.mp4	AV	Song	Angry	Normal	Kids	R2	A8	1	2	5	1	1	2	8	1	1	1	1	1	1	1	1	1	1
01-02-05-01-01-02-09.mp4	AV	Song	Angry	Normal	Kids	R2	A9	1	2	5	1	1	2	9	1	1	1	0	1	0	0	1	1	1
01-02-05-01-01-02-10.mp4	AV	Song	Angry	Normal	Kids	R2	A10	1	2	5	1	1	2	10	1	1	1	1	1	1	1	1	1	1
01-02-05-01-01-02-11.mp4	AV	Song	Angry	Normal	Kids	R2	A11	1	2	5	1	1	2	11	1	1	1	1	1	1	1	0	1	1
01-02-05-01-01-02-12.mp4	AV	Song	Angry	Normal	Kids	R2	A12	1	2	5	1	1	2	12	1	1	1	1	1	1	1	1	1	1
01-02-05-01-01-02-13.mp4	AV	Song	Angry	Normal	Kids	R2	A13	1	2	5	1	1	2	13	0	0	1	1	1	0	1	1	1	1
01-02-05-01-01-02-14.mp4	AV	Song	Angry	Normal	Kids	R2	A14	1	2	5	1	1	2	14	1	0	1	1	1	1	1	1	1	1
01-02-05-01-01-02-15.mp4	AV	Song	Angry	Normal	Kids	R2	A15	1	2	5	1	1	2	15	1	1	1	0	1	1	1	1	0	1
01-02-05-01-01-02-16.mp4	AV	Song	Angry	Normal	Kids	R2	A16	1	2	5	1	1	2	16	1	1	1	1	1	1	1	1	1	1
01-02-05-01-01-02-17.mp4	AV	Song	Angry	Normal	Kids	R2	A17	1	2	5	1	1	2	17	1	1	0	1	1	1	1	1	1	1
01-02-05-01-01-02-19.mp4	AV	Song	Angry	Normal	Kids	R2	A19	1	2	5	1	1	2	19	1	1	1	1	1	1	1	1	1	1
01-02-05-01-01-02-20.mp4	AV	Song	Angry	Normal	Kids	R2	A20	1	2	5	1	1	2	20	1	0	1	1	1	0	1	1	1	0
01-02-05-01-01-02-21.mp4	AV	Song	Angry	Normal	Kids	R2	A21	1	2	5	1	1	2	21	1	1	1	1	1	1	1	1	1	1
01-02-05-01-01-02-22.mp4	AV	Song	Angry	Normal	Kids	R2	A22	1	2	5	1	1	2	22	1	1	1	1	1	0	1	0	1	1
01-02-05-01-01-02-23.mp4	AV	Song	Angry	Normal	Kids	R2	A23	1	2	5	1	1	2	23	1	1	1	1	1	1	1	1	1	1
01-02-05-01-01-02-24.mp4	AV	Song	Angry	Normal	Kids	R2	A24	1	2	5	1	1	2	24	1	1	1	1	0	0	1	1	0	1
01-02-05-01-02-01-01.mp4	AV	Song	Angry	Normal	Dogs	R1	A1	1	2	5	1	2	1	1	1	1	1	1	1	1	1	1	1	1
01-02-05-01-02-01-02.mp4	AV	Song	Angry	Normal	Dogs	R1	A2	1	2	5	1	2	1	2	0	1	1	1	0	1	1	1	1	1
01-02-05-01-02-01-03.mp4	AV	Song	Angry	Normal	Dogs	R1	A3	1	2	5	1	2	1	3	1	1	1	1	1	1	1	1	1	1
01-02-05-01-02-01-04.mp4	AV	Song	Angry	Normal	Dogs	R1	A4	1	2	5	1	2	1	4	0	1	1	1	1	1	1	1	1	1
01-02-05-01-02-01-05.mp4	AV	Song	Angry	Normal	Dogs	R1	A5	1	2	5	1	2	1	5	0	1	1	1	1	1	1	1	1	1
01-02-05-01-02-01-06.mp4	AV	Song	Angry	Normal	Dogs	R1	A6	1	2	5	1	2	1	6	1	0	1	1	1	1	1	1	1	1
01-02-05-01-02-01-07.mp4	AV	Song	Angry	Normal	Dogs	R1	A7	1	2	5	1	2	1	7	1	1	1	1	1	1	1	1	1	1
01-02-05-01-02-01-08.mp4	AV	Song	Angry	Normal	Dogs	R1	A8	1	2	5	1	2	1	8	1	1	1	1	1	1	1	0	0	1
01-02-05-01-02-01-09.mp4	AV	Song	Angry	Normal	Dogs	R1	A9	1	2	5	1	2	1	9	1	1	1	1	1	1	1	1	1	1
01-02-05-01-02-01-10.mp4	AV	Song	Angry	Normal	Dogs	R1	A10	1	2	5	1	2	1	10	1	1	1	1	1	1	1	1	1	1
01-02-05-01-02-01-11.mp4	AV	Song	Angry	Normal	Dogs	R1	A11	1	2	5	1	2	1	11	0	1	1	1	0	1	0	0	1	1
01-02-05-01-02-01-12.mp4	AV	Song	Angry	Normal	Dogs	R1	A12	1	2	5	1	2	1	12	0	0	1	1	1	1	1	1	1	1
01-02-05-01-02-01-13.mp4	AV	Song	Angry	Normal	Dogs	R1	A13	1	2	5	1	2	1	13	1	1	1	1	1	1	1	1	0	1
01-02-05-01-02-01-14.mp4	AV	Song	Angry	Normal	Dogs	R1	A14	1	2	5	1	2	1	14	1	1	1	1	1	1	1	1	1	1
01-02-05-01-02-01-15.mp4	AV	Song	Angry	Normal	Dogs	R1	A15	1	2	5	1	2	1	15	1	1	1	1	1	1	1	0	1	1
01-02-05-01-02-01-16.mp4	AV	Song	Angry	Normal	Dogs	R1	A16	1	2	5	1	2	1	16	1	1	1	0	1	1	1	1	1	1
01-02-05-01-02-01-17.mp4	AV	Song	Angry	Normal	Dogs	R1	A17	1	2	5	1	2	1	17	0	1	1	1	1	1	1	1	1	1
01-02-05-01-02-01-19.mp4	AV	Song	Angry	Normal	Dogs	R1	A19	1	2	5	1	2	1	19	1	1	1	1	1	1	1	1	1	1
01-02-05-01-02-01-20.mp4	AV	Song	Angry	Normal	Dogs	R1	A20	1	2	5	1	2	1	20	0	1	1	1	1	1	1	1	1	1
01-02-05-01-02-01-21.mp4	AV	Song	Angry	Normal	Dogs	R1	A21	1	2	5	1	2	1	21	1	0	1	1	1	0	1	1	0	1
01-02-05-01-02-01-22.mp4	AV	Song	Angry	Normal	Dogs	R1	A22	1	2	5	1	2	1	22	0	0	0	0	0	0	0	0	0	0
01-02-05-01-02-01-23.mp4	AV	Song	Angry	Normal	Dogs	R1	A23	1	2	5	1	2	1	23	1	1	1	1	1	1	1	1	1	1
01-02-05-01-02-01-24.mp4	AV	Song	Angry	Normal	Dogs	R1	A24	1	2	5	1	2	1	24	1	0	1	0	0	1	1	0	0	0
01-02-05-01-02-02-01.mp4	AV	Song	Angry	Normal	Dogs	R2	A1	1	2	5	1	2	2	1	1	1	1	1	0	1	1	1	1	1
01-02-05-01-02-02-02.mp4	AV	Song	Angry	Normal	Dogs	R2	A2	1	2	5	1	2	2	2	1	1	1	1	1	1	1	1	1	1
01-02-05-01-02-02-03.mp4	AV	Song	Angry	Normal	Dogs	R2	A3	1	2	5	1	2	2	3	1	1	1	1	1	1	1	1	1	1
01-02-05-01-02-02-04.mp4	AV	Song	Angry	Normal	Dogs	R2	A4	1	2	5	1	2	2	4	1	1	1	1	1	1	1	1	1	1
01-02-05-01-02-02-05.mp4	AV	Song	Angry	Normal	Dogs	R2	A5	1	2	5	1	2	2	5	1	1	1	1	0	1	1	1	1	0
01-02-05-01-02-02-06.mp4	AV	Song	Angry	Normal	Dogs	R2	A6	1	2	5	1	2	2	6	1	1	1	1	1	1	1	1	1	1
01-02-05-01-02-02-07.mp4	AV	Song	Angry	Normal	Dogs	R2	A7	1	2	5	1	2	2	7	1	1	1	1	1	1	1	0	1	1
01-02-05-01-02-02-08.mp4	AV	Song	Angry	Normal	Dogs	R2	A8	1	2	5	1	2	2	8	1	1	1	1	0	0	1	1	1	1
01-02-05-01-02-02-09.mp4	AV	Song	Angry	Normal	Dogs	R2	A9	1	2	5	1	2	2	9	1	1	1	1	1	1	1	1	1	1
01-02-05-01-02-02-10.mp4	AV	Song	Angry	Normal	Dogs	R2	A10	1	2	5	1	2	2	10	1	1	1	1	1	1	0	0	1	1
01-02-05-01-02-02-11.mp4	AV	Song	Angry	Normal	Dogs	R2	A11	1	2	5	1	2	2	11	1	0	1	0	1	1	1	1	1	1
01-02-05-01-02-02-12.mp4	AV	Song	Angry	Normal	Dogs	R2	A12	1	2	5	1	2	2	12	1	1	1	1	1	1	1	1	1	1
01-02-05-01-02-02-13.mp4	AV	Song	Angry	Normal	Dogs	R2	A13	1	2	5	1	2	2	13	1	0	1	0	0	1	1	1	1	1
01-02-05-01-02-02-14.mp4	AV	Song	Angry	Normal	Dogs	R2	A14	1	2	5	1	2	2	14	1	0	1	1	1	1	1	1	1	0
01-02-05-01-02-02-15.mp4	AV	Song	Angry	Normal	Dogs	R2	A15	1	2	5	1	2	2	15	0	1	1	0	1	1	1	1	1	1
01-02-05-01-02-02-16.mp4	AV	Song	Angry	Normal	Dogs	R2	A16	1	2	5	1	2	2	16	1	1	1	1	1	1	1	1	0	1
01-02-05-01-02-02-17.mp4	AV	Song	Angry	Normal	Dogs	R2	A17	1	2	5	1	2	2	17	1	1	1	1	1	1	1	1	1	1
01-02-05-01-02-02-19.mp4	AV	Song	Angry	Normal	Dogs	R2	A19	1	2	5	1	2	2	19	1	0	0	1	1	0	1	1	1	1
01-02-05-01-02-02-20.mp4	AV	Song	Angry	Normal	Dogs	R2	A20	1	2	5	1	2	2	20	0	1	1	1	1	1	1	1	1	1
01-02-05-01-02-02-21.mp4	AV	Song	Angry	Normal	Dogs	R2	A21	1	2	5	1	2	2	21	1	1	1	1	0	0	1	0	0	0
01-02-05-01-02-02-22.mp4	AV	Song	Angry	Normal	Dogs	R2	A22	1	2	5	1	2	2	22	0	0	0	1	1	1	1	1	1	1
01-02-05-01-02-02-23.mp4	AV	Song	Angry	Normal	Dogs	R2	A23	1	2	5	1	2	2	23	1	1	1	1	1	1	1	1	1	1
01-02-05-01-02-02-24.mp4	AV	Song	Angry	Normal	Dogs	R2	A24	1	2	5	1	2	2	24	1	1	0	0	1	0	1	1	1	1
01-02-05-02-01-01-01.mp4	AV	Song	Angry	Strong	Kids	R1	A1	1	2	5	2	1	1	1	1	1	1	1	1	1	1	1	1	0
01-02-05-02-01-01-02.mp4	AV	Song	Angry	Strong	Kids	R1	A2	1	2	5	2	1	1	2	1	1	1	1	1	1	1	1	1	1
01-02-05-02-01-01-03.mp4	AV	Song	Angry	Strong	Kids	R1	A3	1	2	5	2	1	1	3	1	1	1	1	1	1	1	1	1	1
01-02-05-02-01-01-04.mp4	AV	Song	Angry	Strong	Kids	R1	A4	1	2	5	2	1	1	4	1	1	1	1	1	1	1	1	1	1
01-02-05-02-01-01-05.mp4	AV	Song	Angry	Strong	Kids	R1	A5	1	2	5	2	1	1	5	0	1	1	0	1	0	1	1	1	1
01-02-05-02-01-01-06.mp4	AV	Song	Angry	Strong	Kids	R1	A6	1	2	5	2	1	1	6	1	1	0	1	1	1	1	1	1	1
01-02-05-02-01-01-07.mp4	AV	Song	Angry	Strong	Kids	R1	A7	1	2	5	2	1	1	7	1	1	1	0	1	1	1	1	1	1
01-02-05-02-01-01-08.mp4	AV	Song	Angry	Strong	Kids	R1	A8	1	2	5	2	1	1	8	1	1	1	1	0	1	1	1	1	1
01-02-05-02-01-01-09.mp4	AV	Song	Angry	Strong	Kids	R1	A9	1	2	5	2	1	1	9	1	1	1	1	1	1	1	1	1	1
01-02-05-02-01-01-10.mp4	AV	Song	Angry	Strong	Kids	R1	A10	1	2	5	2	1	1	10	1	1	1	1	1	1	1	1	1	1
01-02-05-02-01-01-11.mp4	AV	Song	Angry	Strong	Kids	R1	A11	1	2	5	2	1	1	11	1	1	1	1	1	1	0	1	1	1
01-02-05-02-01-01-12.mp4	AV	Song	Angry	Strong	Kids	R1	A12	1	2	5	2	1	1	12	1	1	1	1	1	0	1	1	1	1
01-02-05-02-01-01-13.mp4	AV	Song	Angry	Strong	Kids	R1	A13	1	2	5	2	1	1	13	1	1	1	1	0	1	1	1	1	1
01-02-05-02-01-01-14.mp4	AV	Song	Angry	Strong	Kids	R1	A14	1	2	5	2	1	1	14	1	1	1	1	1	1	1	1	1	1
01-02-05-02-01-01-15.mp4	AV	Song	Angry	Strong	Kids	R1	A15	1	2	5	2	1	1	15	1	1	1	1	1	1	1	0	1	1
01-02-05-02-01-01-16.mp4	AV	Song	Angry	Strong	Kids	R1	A16	1	2	5	2	1	1	16	1	1	1	1	1	1	1	1	1	1
01-02-05-02-01-01-17.mp4	AV	Song	Angry	Strong	Kids	R1	A17	1	2	5	2	1	1	17	1	1	1	1	1	1	1	1	1	1
01-02-05-02-01-01-19.mp4	AV	Song	Angry	Strong	Kids	R1	A19	1	2	5	2	1	1	19	1	1	1	1	1	1	1	1	1	1
01-02-05-02-01-01-20.mp4	AV	Song	Angry	Strong	Kids	R1	A20	1	2	5	2	1	1	20	1	1	1	1	1	1	0	1	1	1
01-02-05-02-01-01-21.mp4	AV	Song	Angry	Strong	Kids	R1	A21	1	2	5	2	1	1	21	1	1	0	1	1	1	0	1	1	1
01-02-05-02-01-01-22.mp4	AV	Song	Angry	Strong	Kids	R1	A22	1	2	5	2	1	1	22	1	1	1	1	1	1	1	1	1	1
01-02-05-02-01-01-23.mp4	AV	Song	Angry	Strong	Kids	R1	A23	1	2	5	2	1	1	23	1	1	1	1	1	1	1	1	1	1
01-02-05-02-01-01-24.mp4	AV	Song	Angry	Strong	Kids	R1	A24	1	2	5	2	1	1	24	1	1	1	1	1	1	1	0	1	1
01-02-05-02-01-02-01.mp4	AV	Song	Angry	Strong	Kids	R2	A1	1	2	5	2	1	2	1	1	1	1	1	1	1	1	1	1	1
01-02-05-02-01-02-02.mp4	AV	Song	Angry	Strong	Kids	R2	A2	1	2	5	2	1	2	2	1	1	1	1	1	1	1	1	1	1
01-02-05-02-01-02-03.mp4	AV	Song	Angry	Strong	Kids	R2	A3	1	2	5	2	1	2	3	1	1	0	1	1	1	1	1	1	1
01-02-05-02-01-02-04.mp4	AV	Song	Angry	Strong	Kids	R2	A4	1	2	5	2	1	2	4	1	1	1	1	1	1	1	1	1	0
01-02-05-02-01-02-05.mp4	AV	Song	Angry	Strong	Kids	R2	A5	1	2	5	2	1	2	5	1	1	1	1	0	1	1	1	1	1
01-02-05-02-01-02-06.mp4	AV	Song	Angry	Strong	Kids	R2	A6	1	2	5	2	1	2	6	1	1	1	1	1	1	1	1	0	1
01-02-05-02-01-02-07.mp4	AV	Song	Angry	Strong	Kids	R2	A7	1	2	5	2	1	2	7	1	1	1	1	1	0	1	1	1	1
01-02-05-02-01-02-08.mp4	AV	Song	Angry	Strong	Kids	R2	A8	1	2	5	2	1	2	8	1	1	1	1	1	1	1	1	1	1
01-02-05-02-01-02-09.mp4	AV	Song	Angry	Strong	Kids	R2	A9	1	2	5	2	1	2	9	1	1	1	1	1	1	1	1	1	1
01-02-05-02-01-02-10.mp4	AV	Song	Angry	Strong	Kids	R2	A10	1	2	5	2	1	2	10	1	1	1	1	1	1	1	1	1	1
01-02-05-02-01-02-11.mp4	AV	Song	Angry	Strong	Kids	R2	A11	1	2	5	2	1	2	11	1	1	1	1	0	1	1	1	1	1
01-02-05-02-01-02-12.mp4	AV	Song	Angry	Strong	Kids	R2	A12	1	2	5	2	1	2	12	1	1	1	1	1	1	1	1	1	1
01-02-05-02-01-02-13.mp4	AV	Song	Angry	Strong	Kids	R2	A13	1	2	5	2	1	2	13	1	1	1	1	1	1	1	0	1	1
01-02-05-02-01-02-14.mp4	AV	Song	Angry	Strong	Kids	R2	A14	1	2	5	2	1	2	14	1	1	1	1	1	1	1	1	1	1
01-02-05-02-01-02-15.mp4	AV	Song	Angry	Strong	Kids	R2	A15	1	2	5	2	1	2	15	1	1	0	1	1	1	1	1	1	1
01-02-05-02-01-02-16.mp4	AV	Song	Angry	Strong	Kids	R2	A16	1	2	5	2	1	2	16	1	1	1	1	1	1	1	1	1	1
01-02-05-02-01-02-17.mp4	AV	Song	Angry	Strong	Kids	R2	A17	1	2	5	2	1	2	17	1	0	1	1	1	1	1	1	1	1
01-02-05-02-01-02-19.mp4	AV	Song	Angry	Strong	Kids	R2	A19	1	2	5	2	1	2	19	1	1	1	1	1	1	1	1	1	1
01-02-05-02-01-02-20.mp4	AV	Song	Angry	Strong	Kids	R2	A20	1	2	5	2	1	2	20	1	1	1	1	1	1	1	1	1	1
01-02-05-02-01-02-21.mp4	AV	Song	Angry	Strong	Kids	R2	A21	1	2	5	2	1	2	21	1	1	0	1	1	1	1	1	1	1
01-02-05-02-01-02-22.mp4	AV	Song	Angry	Strong	Kids	R2	A22	1	2	5	2	1	2	22	1	1	1	1	0	1	1	1	1	0
01-02-05-02-01-02-23.mp4	AV	Song	Angry	Strong	Kids	R2	A23	1	2	5	2	1	2	23	1	1	1	1	1	1	1	1	1	1
01-02-05-02-01-02-24.mp4	AV	Song	Angry	Strong	Kids	R2	A24	1	2	5	2	1	2	24	1	1	1	1	0	1	1	1	1	1
01-02-05-02-02-01-01.mp4	AV	Song	Angry	Strong	Dogs	R1	A1	1	2	5	2	2	1	1	1	1	1	1	1	1	1	1	1	1
01-02-05-02-02-01-02.mp4	AV	Song	Angry	Strong	Dogs	R1	A2	1	2	5	2	2	1	2	1	1	1	1	1	1	1	1	1	1
01-02-05-02-02-01-03.mp4	AV	Song	Angry	Strong	Dogs	R1	A3	1	2	5	2	2	1	3	0	1	1	1	1	1	1	1	1	1
01-02-05-02-02-01-04.mp4	AV	Song	Angry	Strong	Dogs	R1	A4	1	2	5	2	2	1	4	1	1	1	1	1	1	1	0	1	1
01-02-05-02-02-01-05.mp4	AV	Song	Angry	Strong	Dogs	R1	A5	1	2	5	2	2	1	5	1	1	1	1	1	1	1	1	1	1
01-02-05-02-02-01-06.mp4	AV	Song	Angry	Strong	Dogs	R1	A6	1	2	5	2	2	1	6	1	1	1	1	1	1	1	1	1	1
01-02-05-02-02-01-07.mp4	AV	Song	Angry	Strong	Dogs	R1	A7	1	2	5	2	2	1	7	1	1	1	0	1	1	1	1	1	1
01-02-05-02-02-01-08.mp4	AV	Song	Angry	Strong	Dogs	R1	A8	1	2	5	2	2	1	8	1	1	1	1	1	1	1	1	1	1
01-02-05-02-02-01-09.mp4	AV	Song	Angry	Strong	Dogs	R1	A9	1	2	5	2	2	1	9	1	1	1	1	1	1	1	1	1	0
01-02-05-02-02-01-10.mp4	AV	Song	Angry	Strong	Dogs	R1	A10	1	2	5	2	2	1	10	1	1	1	1	1	1	1	1	1	1
01-02-05-02-02-01-11.mp4	AV	Song	Angry	Strong	Dogs	R1	A11	1	2	5	2	2	1	11	1	1	1	1	1	1	1	0	1	1
01-02-05-02-02-01-12.mp4	AV	Song	Angry	Strong	Dogs	R1	A12	1	2	5	2	2	1	12	1	1	1	1	1	1	1	1	1	1
01-02-05-02-02-01-13.mp4	AV	Song	Angry	Strong	Dogs	R1	A13	1	2	5	2	2	1	13	1	1	1	1	1	1	1	1	1	1
01-02-05-02-02-01-14.mp4	AV	Song	Angry	Strong	Dogs	R1	A14	1	2	5	2	2	1	14	1	1	1	1	1	1	1	1	1	1
01-02-05-02-02-01-15.mp4	AV	Song	Angry	Strong	Dogs	R1	A15	1	2	5	2	2	1	15	1	1	1	0	1	1	1	1	1	1
01-02-05-02-02-01-16.mp4	AV	Song	Angry	Strong	Dogs	R1	A16	1	2	5	2	2	1	16	1	1	1	1	1	1	1	1	1	1
01-02-05-02-02-01-17.mp4	AV	Song	Angry	Strong	Dogs	R1	A17	1	2	5	2	2	1	17	1	1	1	1	1	1	1	1	1	1
01-02-05-02-02-01-19.mp4	AV	Song	Angry	Strong	Dogs	R1	A19	1	2	5	2	2	1	19	0	1	1	1	1	1	1	1	1	0
01-02-05-02-02-01-20.mp4	AV	Song	Angry	Strong	Dogs	R1	A20	1	2	5	2	2	1	20	1	0	0	0	0	0	0	1	1	1
01-02-05-02-02-01-21.mp4	AV	Song	Angry	Strong	Dogs	R1	A21	1	2	5	2	2	1	21	1	1	1	0	1	1	1	1	1	1
01-02-05-02-02-01-22.mp4	AV	Song	Angry	Strong	Dogs	R1	A22	1	2	5	2	2	1	22	1	1	1	1	1	1	1	1	1	1
01-02-05-02-02-01-23.mp4	AV	Song	Angry	Strong	Dogs	R1	A23	1	2	5	2	2	1	23	1	1	1	1	1	1	1	1	1	1
01-02-05-02-02-01-24.mp4	AV	Song	Angry	Strong	Dogs	R1	A24	1	2	5	2	2	1	24	1	1	0	1	1	1	1	1	1	1
01-02-05-02-02-02-01.mp4	AV	Song	Angry	Strong	Dogs	R2	A1	1	2	5	2	2	2	1	0	1	1	1	1	1	1	1	0	1
01-02-05-02-02-02-02.mp4	AV	Song	Angry	Strong	Dogs	R2	A2	1	2	5	2	2	2	2	1	1	1	1	1	1	1	1	1	1
01-02-05-02-02-02-03.mp4	AV	Song	Angry	Strong	Dogs	R2	A3	1	2	5	2	2	2	3	0	1	1	1	1	1	1	1	1	1
01-02-05-02-02-02-04.mp4	AV	Song	Angry	Strong	Dogs	R2	A4	1	2	5	2	2	2	4	1	1	1	1	1	1	0	1	1	0
01-02-05-02-02-02-05.mp4	AV	Song	Angry	Strong	Dogs	R2	A5	1	2	5	2	2	2	5	1	1	1	1	1	0	1	0	1	0
01-02-05-02-02-02-06.mp4	AV	Song	Angry	Strong	Dogs	R2	A6	1	2	5	2	2	2	6	1	1	1	1	1	1	1	1	1	1
01-02-05-02-02-02-07.mp4	AV	Song	Angry	Strong	Dogs	R2	A7	1	2	5	2	2	2	7	1	1	1	1	1	1	1	1	1	1
01-02-05-02-02-02-08.mp4	AV	Song	Angry	Strong	Dogs	R2	A8	1	2	5	2	2	2	8	1	1	1	1	1	1	1	1	1	1
01-02-05-02-02-02-09.mp4	AV	Song	Angry	Strong	Dogs	R2	A9	1	2	5	2	2	2	9	1	1	1	1	1	1	1	1	1	1
01-02-05-02-02-02-10.mp4	AV	Song	Angry	Strong	Dogs	R2	A10	1	2	5	2	2	2	10	1	1	1	1	1	1	1	1	1	1
01-02-05-02-02-02-11.mp4	AV	Song	Angry	Strong	Dogs	R2	A11	1	2	5	2	2	2	11	1	1	0	1	1	1	1	1	1	0
01-02-05-02-02-02-12.mp4	AV	Song	Angry	Strong	Dogs	R2	A12	1	2	5	2	2	2	12	1	1	1	1	1	1	1	1	1	1
01-02-05-02-02-02-13.mp4	AV	Song	Angry	Strong	Dogs	R2	A13	1	2	5	2	2	2	13	1	1	1	1	1	1	1	1	1	1
01-02-05-02-02-02-14.mp4	AV	Song	Angry	Strong	Dogs	R2	A14	1	2	5	2	2	2	14	1	1	1	1	1	1	1	1	1	1
01-02-05-02-02-02-15.mp4	AV	Song	Angry	Strong	Dogs	R2	A15	1	2	5	2	2	2	15	1	1	1	1	1	1	1	1	1	1
01-02-05-02-02-02-16.mp4	AV	Song	Angry	Strong	Dogs	R2	A16	1	2	5	2	2	2	16	1	1	1	1	1	1	1	1	1	1
01-02-05-02-02-02-17.mp4	AV	Song	Angry	Strong	Dogs	R2	A17	1	2	5	2	2	2	17	1	1	1	1	1	1	1	1	1	1
01-02-05-02-02-02-19.mp4	AV	Song	Angry	Strong	Dogs	R2	A19	1	2	5	2	2	2	19	1	1	1	1	1	1	1	1	1	1
01-02-05-02-02-02-20.mp4	AV	Song	Angry	Strong	Dogs	R2	A20	1	2	5	2	2	2	20	0	0	0	1	0	0	1	0	0	0
01-02-05-02-02-02-21.mp4	AV	Song	Angry	Strong	Dogs	R2	A21	1	2	5	2	2	2	21	1	1	1	1	1	1	1	1	0	1
01-02-05-02-02-02-22.mp4	AV	Song	Angry	Strong	Dogs	R2	A22	1	2	5	2	2	2	22	1	1	1	1	1	1	1	1	1	1
01-02-05-02-02-02-23.mp4	AV	Song	Angry	Strong	Dogs	R2	A23	1	2	5	2	2	2	23	1	1	1	1	1	1	1	1	1	1
01-02-05-02-02-02-24.mp4	AV	Song	Angry	Strong	Dogs	R2	A24	1	2	5	2	2	2	24	1	1	1	1	1	0	0	0	1	1
01-02-06-01-01-01-01.mp4	AV	Song	Fearful	Normal	Kids	R1	A1	1	2	6	1	1	1	1	1	0	0	0	0	1	0	1	0	0
01-02-06-01-01-01-02.mp4	AV	Song	Fearful	Normal	Kids	R1	A2	1	2	6	1	1	1	2	0	0	0	0	0	0	1	0	1	0
01-02-06-01-01-01-03.mp4	AV	Song	Fearful	Normal	Kids	R1	A3	1	2	6	1	1	1	3	1	1	0	1	1	1	1	1	0	1
01-02-06-01-01-01-04.mp4	AV	Song	Fearful	Normal	Kids	R1	A4	1	2	6	1	1	1	4	1	1	1	1	1	1	0	0	1	1
01-02-06-01-01-01-05.mp4	AV	Song	Fearful	Normal	Kids	R1	A5	1	2	6	1	1	1	5	0	1	1	1	1	1	1	1	1	1
01-02-06-01-01-01-06.mp4	AV	Song	Fearful	Normal	Kids	R1	A6	1	2	6	1	1	1	6	1	1	0	0	1	1	1	1	0	1
01-02-06-01-01-01-07.mp4	AV	Song	Fearful	Normal	Kids	R1	A7	1	2	6	1	1	1	7	1	0	0	0	1	1	0	1	1	1
01-02-06-01-01-01-08.mp4	AV	Song	Fearful	Normal	Kids	R1	A8	1	2	6	1	1	1	8	1	1	1	1	1	1	1	1	1	0
01-02-06-01-01-01-09.mp4	AV	Song	Fearful	Normal	Kids	R1	A9	1	2	6	1	1	1	9	0	1	1	1	1	1	1	1	1	1
01-02-06-01-01-01-10.mp4	AV	Song	Fearful	Normal	Kids	R1	A10	1	2	6	1	1	1	10	0	0	0	0	0	0	1	0	0	0
01-02-06-01-01-01-11.mp4	AV	Song	Fearful	Normal	Kids	R1	A11	1	2	6	1	1	1	11	1	0	1	1	1	1	1	1	1	1
01-02-06-01-01-01-12.mp4	AV	Song	Fearful	Normal	Kids	R1	A12	1	2	6	1	1	1	12	1	1	1	1	1	1	1	1	1	1
01-02-06-01-01-01-13.mp4	AV	Song	Fearful	Normal	Kids	R1	A13	1	2	6	1	1	1	13	0	1	0	1	0	0	0	0	0	1
01-02-06-01-01-01-14.mp4	AV	Song	Fearful	Normal	Kids	R1	A14	1	2	6	1	1	1	14	1	1	0	0	1	0	1	1	1	1
01-02-06-01-01-01-15.mp4	AV	Song	Fearful	Normal	Kids	R1	A15	1	2	6	1	1	1	15	0	1	0	1	1	1	0	0	0	1
01-02-06-01-01-01-16.mp4	AV	Song	Fearful	Normal	Kids	R1	A16	1	2	6	1	1	1	16	1	0	1	1	1	1	1	1	0	0
01-02-06-01-01-01-17.mp4	AV	Song	Fearful	Normal	Kids	R1	A17	1	2	6	1	1	1	17	0	1	0	1	1	0	0	1	1	0
01-02-06-01-01-01-19.mp4	AV	Song	Fearful	Normal	Kids	R1	A19	1	2	6	1	1	1	19	1	1	1	1	0	1	1	1	1	1
01-02-06-01-01-01-20.mp4	AV	Song	Fearful	Normal	Kids	R1	A20	1	2	6	1	1	1	20	1	1	1	1	0	1	1	1	1	1
01-02-06-01-01-01-21.mp4	AV	Song	Fearful	Normal	Kids	R1	A21	1	2	6	1	1	1	21	1	0	1	1	0	1	1	1	1	1
01-02-06-01-01-01-22.mp4	AV	Song	Fearful	Normal	Kids	R1	A22	1	2	6	1	1	1	22	1	0	0	0	0	1	1	1	1	1
01-02-06-01-01-01-23.mp4	AV	Song	Fearful	Normal	Kids	R1	A23	1	2	6	1	1	1	23	1	1	1	1	1	1	1	1	1	1
01-02-06-01-01-01-24.mp4	AV	Song	Fearful	Normal	Kids	R1	A24	1	2	6	1	1	1	24	1	1	1	1	1	1	1	1	1	1
01-02-06-01-01-02-01.mp4	AV	Song	Fearful	Normal	Kids	R2	A1	1	2	6	1	1	2	1	0	0	0	0	0	0	0	0	0	0
01-02-06-01-01-02-02.mp4	AV	Song	Fearful	Normal	Kids	R2	A2	1	2	6	1	1	2	2	0	0	0	0	0	1	1	1	1	1
01-02-06-01-01-02-03.mp4	AV	Song	Fearful	Normal	Kids	R2	A3	1	2	6	1	1	2	3	1	1	1	1	1	1	1	1	1	1
01-02-06-01-01-02-04.mp4	AV	Song	Fearful	Normal	Kids	R2	A4	1	2	6	1	1	2	4	1	1	1	1	1	1	1	1	1	1
01-02-06-01-01-02-05.mp4	AV	Song	Fearful	Normal	Kids	R2	A5	1	2	6	1	1	2	5	1	1	1	1	1	1	1	1	1	1
01-02-06-01-01-02-06.mp4	AV	Song	Fearful	Normal	Kids	R2	A6	1	2	6	1	1	2	6	1	0	0	1	0	0	1	1	1	1
01-02-06-01-01-02-07.mp4	AV	Song	Fearful	Normal	Kids	R2	A7	1	2	6	1	1	2	7	0	0	0	1	1	1	0	1	1	0
01-02-06-01-01-02-08.mp4	AV	Song	Fearful	Normal	Kids	R2	A8	1	2	6	1	1	2	8	1	1	1	1	1	1	1	1	1	1
01-02-06-01-01-02-09.mp4	AV	Song	Fearful	Normal	Kids	R2	A9	1	2	6	1	1	2	9	1	1	1	0	0	0	1	1	0	1
01-02-06-01-01-02-10.mp4	AV	Song	Fearful	Normal	Kids	R2	A10	1	2	6	1	1	2	10	0	1	0	0	0	0	0	0	0	0
01-02-06-01-01-02-11.mp4	AV	Song	Fearful	Normal	Kids	R2	A11	1	2	6	1	1	2	11	1	1	1	1	0	1	1	1	1	1
01-02-06-01-01-02-12.mp4	AV	Song	Fearful	Normal	Kids	R2	A12	1	2	6	1	1	2	12	1	1	1	1	1	1	1	0	0	1
01-02-06-01-01-02-13.mp4	AV	Song	Fearful	Normal	Kids	R2	A13	1	2	6	1	1	2	13	1	0	0	1	1	1	1	0	0	0
01-02-06-01-01-02-14.mp4	AV	Song	Fearful	Normal	Kids	R2	A14	1	2	6	1	1	2	14	1	1	1	1	1	1	1	1	1	0
01-02-06-01-01-02-15.mp4	AV	Song	Fearful	Normal	Kids	R2	A15	1	2	6	1	1	2	15	0	1	0	0	1	0	1	0	0	1
01-02-06-01-01-02-16.mp4	AV	Song	Fearful	Normal	Kids	R2	A16	1	2	6	1	1	2	16	1	1	1	1	1	1	1	0	1	1
01-02-06-01-01-02-17.mp4	AV	Song	Fearful	Normal	Kids	R2	A17	1	2	6	1	1	2	17	0	1	0	0	0	0	0	1	0	0
01-02-06-01-01-02-19.mp4	AV	Song	Fearful	Normal	Kids	R2	A19	1	2	6	1	1	2	19	0	0	0	1	0	0	1	1	1	1
01-02-06-01-01-02-20.mp4	AV	Song	Fearful	Normal	Kids	R2	A20	1	2	6	1	1	2	20	1	1	1	1	1	1	1	1	1	1
01-02-06-01-01-02-21.mp4	AV	Song	Fearful	Normal	Kids	R2	A21	1	2	6	1	1	2	21	0	1	1	1	1	1	1	1	0	1
01-02-06-01-01-02-22.mp4	AV	Song	Fearful	Normal	Kids	R2	A22	1	2	6	1	1	2	22	0	0	0	0	1	1	1	1	1	1
01-02-06-01-01-02-23.mp4	AV	Song	Fearful	Normal	Kids	R2	A23	1	2	6	1	1	2	23	1	1	1	1	1	1	1	1	1	1
01-02-06-01-01-02-24.mp4	AV	Song	Fearful	Normal	Kids	R2	A24	1	2	6	1	1	2	24	1	1	1	1	1	1	1	1	1	1
01-02-06-01-02-01-01.mp4	AV	Song	Fearful	Normal	Dogs	R1	A1	1	2	6	1	2	1	1	0	0	1	1	0	1	1	1	0	1
01-02-06-01-02-01-02.mp4	AV	Song	Fearful	Normal	Dogs	R1	A2	1	2	6	1	2	1	2	1	0	0	0	0	1	0	0	0	1
01-02-06-01-02-01-03.mp4	AV	Song	Fearful	Normal	Dogs	R1	A3	1	2	6	1	2	1	3	1	0	0	1	1	1	1	1	1	1
01-02-06-01-02-01-04.mp4	AV	Song	Fearful	Normal	Dogs	R1	A4	1	2	6	1	2	1	4	1	1	1	1	1	1	1	1	1	1
01-02-06-01-02-01-05.mp4	AV	Song	Fearful	Normal	Dogs	R1	A5	1	2	6	1	2	1	5	1	1	1	1	1	1	1	1	1	1
01-02-06-01-02-01-06.mp4	AV	Song	Fearful	Normal	Dogs	R1	A6	1	2	6	1	2	1	6	1	0	1	0	0	0	1	1	0	0
01-02-06-01-02-01-07.mp4	AV	Song	Fearful	Normal	Dogs	R1	A7	1	2	6	1	2	1	7	1	0	1	0	0	0	0	0	1	1
01-02-06-01-02-01-08.mp4	AV	Song	Fearful	Normal	Dogs	R1	A8	1	2	6	1	2	1	8	1	1	1	1	1	1	1	1	1	1
01-02-06-01-02-01-09.mp4	AV	Song	Fearful	Normal	Dogs	R1	A9	1	2	6	1	2	1	9	1	1	1	1	1	1	1	1	1	1
01-02-06-01-02-01-10.mp4	AV	Song	Fearful	Normal	Dogs	R1	A10	1	2	6	1	2	1	10	1	0	1	0	1	1	1	1	1	1
01-02-06-01-02-01-11.mp4	AV	Song	Fearful	Normal	Dogs	R1	A11	1	2	6	1	2	1	11	1	1	1	1	1	1	1	1	0	1
01-02-06-01-02-01-12.mp4	AV	Song	Fearful	Normal	Dogs	R1	A12	1	2	6	1	2	1	12	1	1	1	1	1	1	1	1	1	1
01-02-06-01-02-01-13.mp4	AV	Song	Fearful	Normal	Dogs	R1	A13	1	2	6	1	2	1	13	0	0	0	0	1	0	0	1	1	0
01-02-06-01-02-01-14.mp4	AV	Song	Fearful	Normal	Dogs	R1	A14	1	2	6	1	2	1	14	0	1	0	1	1	1	1	1	1	1
01-02-06-01-02-01-15.mp4	AV	Song	Fearful	Normal	Dogs	R1	A15	1	2	6	1	2	1	15	0	0	1	1	1	0	1	1	1	1
01-02-06-01-02-01-16.mp4	AV	Song	Fearful	Normal	Dogs	R1	A16	1	2	6	1	2	1	16	1	1	1	1	1	1	1	1	1	1
01-02-06-01-02-01-17.mp4	AV	Song	Fearful	Normal	Dogs	R1	A17	1	2	6	1	2	1	17	0	0	0	1	0	0	1	0	1	1
01-02-06-01-02-01-19.mp4	AV	Song	Fearful	Normal	Dogs	R1	A19	1	2	6	1	2	1	19	1	1	0	0	0	1	1	1	1	0
01-02-06-01-02-01-20.mp4	AV	Song	Fearful	Normal	Dogs	R1	A20	1	2	6	1	2	1	20	1	1	1	1	1	1	0	1	1	1
01-02-06-01-02-01-21.mp4	AV	Song	Fearful	Normal	Dogs	R1	A21	1	2	6	1	2	1	21	1	1	1	1	0	0	1	0	1	1
01-02-06-01-02-01-22.mp4	AV	Song	Fearful	Normal	Dogs	R1	A22	1	2	6	1	2	1	22	1	1	1	0	0	0	0	0	1	1
01-02-06-01-02-01-23.mp4	AV	Song	Fearful	Normal	Dogs	R1	A23	1	2	6	1	2	1	23	1	1	1	1	0	1	1	1	1	1
01-02-06-01-02-01-24.mp4	AV	Song	Fearful	Normal	Dogs	R1	A24	1	2	6	1	2	1	24	1	1	1	1	1	1	1	1	1	1
01-02-06-01-02-02-01.mp4	AV	Song	Fearful	Normal	Dogs	R2	A1	1	2	6	1	2	2	1	1	1	0	1	1	1	0	1	0	1
01-02-06-01-02-02-02.mp4	AV	Song	Fearful	Normal	Dogs	R2	A2	1	2	6	1	2	2	2	1	1	0	1	0	1	0	1	1	0
01-02-06-01-02-02-03.mp4	AV	Song	Fearful	Normal	Dogs	R2	A3	1	2	6	1	2	2	3	1	1	1	1	0	1	1	1	1	1
01-02-06-01-02-02-04.mp4	AV	Song	Fearful	Normal	Dogs	R2	A4	1	2	6	1	2	2	4	1	1	1	1	1	1	1	1	1	1
01-02-06-01-02-02-05.mp4	AV	Song	Fearful	Normal	Dogs	R2	A5	1	2	6	1	2	2	5	1	1	1	1	1	1	1	0	1	1
01-02-06-01-02-02-06.mp4	AV	Song	Fearful	Normal	Dogs	R2	A6	1	2	6	1	2	2	6	1	1	1	0	0	1	1	0	1	1
01-02-06-01-02-02-07.mp4	AV	Song	Fearful	Normal	Dogs	R2	A7	1	2	6	1	2	2	7	1	0	1	1	1	1	1	1	1	0
01-02-06-01-02-02-08.mp4	AV	Song	Fearful	Normal	Dogs	R2	A8	1	2	6	1	2	2	8	1	1	1	1	1	1	1	1	1	1
01-02-06-01-02-02-09.mp4	AV	Song	Fearful	Normal	Dogs	R2	A9	1	2	6	1	2	2	9	1	1	0	1	1	1	1	1	1	0
01-02-06-01-02-02-10.mp4	AV	Song	Fearful	Normal	Dogs	R2	A10	1	2	6	1	2	2	10	0	1	0	0	0	0	0	1	1	1
01-02-06-01-02-02-11.mp4	AV	Song	Fearful	Normal	Dogs	R2	A11	1	2	6	1	2	2	11	0	0	0	0	0	1	1	1	1	1
01-02-06-01-02-02-12.mp4	AV	Song	Fearful	Normal	Dogs	R2	A12	1	2	6	1	2	2	12	1	1	1	1	1	1	1	0	1	0
01-02-06-01-02-02-13.mp4	AV	Song	Fearful	Normal	Dogs	R2	A13	1	2	6	1	2	2	13	0	0	1	0	0	0	0	1	1	0
01-02-06-01-02-02-14.mp4	AV	Song	Fearful	Normal	Dogs	R2	A14	1	2	6	1	2	2	14	1	1	1	1	1	1	1	1	1	1
01-02-06-01-02-02-15.mp4	AV	Song	Fearful	Normal	Dogs	R2	A15	1	2	6	1	2	2	15	1	1	0	1	1	0	1	1	1	1
01-02-06-01-02-02-16.mp4	AV	Song	Fearful	Normal	Dogs	R2	A16	1	2	6	1	2	2	16	1	1	1	1	1	1	1	0	0	1
01-02-06-01-02-02-17.mp4	AV	Song	Fearful	Normal	Dogs	R2	A17	1	2	6	1	2	2	17	0	0	0	1	0	1	1	0	1	0
01-02-06-01-02-02-19.mp4	AV	Song	Fearful	Normal	Dogs	R2	A19	1	2	6	1	2	2	19	1	1	0	1	0	0	0	0	0	1
01-02-06-01-02-02-20.mp4	AV	Song	Fearful	Normal	Dogs	R2	A20	1	2	6	1	2	2	20	1	1	0	1	1	1	1	1	1	1
01-02-06-01-02-02-21.mp4	AV	Song	Fearful	Normal	Dogs	R2	A21	1	2	6	1	2	2	21	1	1	0	0	0	0	1	1	1	0
01-02-06-01-02-02-22.mp4	AV	Song	Fearful	Normal	Dogs	R2	A22	1	2	6	1	2	2	22	1	0	1	0	1	0	1	1	1	1
01-02-06-01-02-02-23.mp4	AV	Song	Fearful	Normal	Dogs	R2	A23	1	2	6	1	2	2	23	1	0	1	1	1	1	0	0	0	1
01-02-06-01-02-02-24.mp4	AV	Song	Fearful	Normal	Dogs	R2	A24	1	2	6	1	2	2	24	1	1	1	1	1	1	1	1	1	1
01-02-06-02-01-01-01.mp4	AV	Song	Fearful	Strong	Kids	R1	A1	1	2	6	2	1	1	1	1	1	1	1	1	1	0	1	1	0
01-02-06-02-01-01-02.mp4	AV	Song	Fearful	Strong	Kids	R1	A2	1	2	6	2	1	1	2	1	1	0	0	0	1	1	1	1	0
01-02-06-02-01-01-03.mp4	AV	Song	Fearful	Strong	Kids	R1	A3	1	2	6	2	1	1	3	1	1	1	1	1	1	0	0	1	1
01-02-06-02-01-01-04.mp4	AV	Song	Fearful	Strong	Kids	R1	A4	1	2	6	2	1	1	4	0	1	1	1	0	1	1	0	1	1
01-02-06-02-01-01-05.mp4	AV	Song	Fearful	Strong	Kids	R1	A5	1	2	6	2	1	1	5	1	1	1	1	1	1	1	1	0	1
01-02-06-02-01-01-06.mp4	AV	Song	Fearful	Strong	Kids	R1	A6	1	2	6	2	1	1	6	1	1	1	1	0	0	1	0	1	1
01-02-06-02-01-01-07.mp4	AV	Song	Fearful	Strong	Kids	R1	A7	1	2	6	2	1	1	7	1	1	1	1	1	1	1	1	1	1
01-02-06-02-01-01-08.mp4	AV	Song	Fearful	Strong	Kids	R1	A8	1	2	6	2	1	1	8	1	1	1	1	1	1	1	1	1	1
01-02-06-02-01-01-09.mp4	AV	Song	Fearful	Strong	Kids	R1	A9	1	2	6	2	1	1	9	1	1	1	1	1	0	1	1	1	1
01-02-06-02-01-01-10.mp4	AV	Song	Fearful	Strong	Kids	R1	A10	1	2	6	2	1	1	10	1	1	1	1	1	1	1	1	1	1
01-02-06-02-01-01-11.mp4	AV	Song	Fearful	Strong	Kids	R1	A11	1	2	6	2	1	1	11	1	1	1	1	1	1	1	1	1	1
01-02-06-02-01-01-12.mp4	AV	Song	Fearful	Strong	Kids	R1	A12	1	2	6	2	1	1	12	1	1	1	1	1	1	1	1	1	1
01-02-06-02-01-01-13.mp4	AV	Song	Fearful	Strong	Kids	R1	A13	1	2	6	2	1	1	13	0	1	0	0	1	0	0	1	1	1
01-02-06-02-01-01-14.mp4	AV	Song	Fearful	Strong	Kids	R1	A14	1	2	6	2	1	1	14	1	1	1	1	1	1	1	1	1	1
01-02-06-02-01-01-15.mp4	AV	Song	Fearful	Strong	Kids	R1	A15	1	2	6	2	1	1	15	1	1	1	0	1	1	1	1	0	1
01-02-06-02-01-01-16.mp4	AV	Song	Fearful	Strong	Kids	R1	A16	1	2	6	2	1	1	16	1	1	1	1	0	1	1	1	1	1
01-02-06-02-01-01-17.mp4	AV	Song	Fearful	Strong	Kids	R1	A17	1	2	6	2	1	1	17	1	1	1	0	1	1	1	0	1	0
01-02-06-02-01-01-19.mp4	AV	Song	Fearful	Strong	Kids	R1	A19	1	2	6	2	1	1	19	1	1	1	0	0	0	1	1	0	0
01-02-06-02-01-01-20.mp4	AV	Song	Fearful	Strong	Kids	R1	A20	1	2	6	2	1	1	20	1	1	1	1	1	1	1	1	1	1
01-02-06-02-01-01-21.mp4	AV	Song	Fearful	Strong	Kids	R1	A21	1	2	6	2	1	1	21	1	1	1	1	1	1	1	1	1	1
01-02-06-02-01-01-22.mp4	AV	Song	Fearful	Strong	Kids	R1	A22	1	2	6	2	1	1	22	1	0	1	1	0	1	1	1	1	1
01-02-06-02-01-01-23.mp4	AV	Song	Fearful	Strong	Kids	R1	A23	1	2	6	2	1	1	23	1	1	1	1	1	1	1	1	1	1
01-02-06-02-01-01-24.mp4	AV	Song	Fearful	Strong	Kids	R1	A24	1	2	6	2	1	1	24	1	1	1	1	0	1	1	1	1	1
01-02-06-02-01-02-01.mp4	AV	Song	Fearful	Strong	Kids	R2	A1	1	2	6	2	1	2	1	1	1	1	1	1	1	1	1	1	1
01-02-06-02-01-02-02.mp4	AV	Song	Fearful	Strong	Kids	R2	A2	1	2	6	2	1	2	2	1	0	1	1	1	0	0	1	1	1
01-02-06-02-01-02-03.mp4	AV	Song	Fearful	Strong	Kids	R2	A3	1	2	6	2	1	2	3	1	1	1	1	1	0	1	1	1	0
01-02-06-02-01-02-04.mp4	AV	Song	Fearful	Strong	Kids	R2	A4	1	2	6	2	1	2	4	1	1	1	1	1	1	1	1	1	1
01-02-06-02-01-02-05.mp4	AV	Song	Fearful	Strong	Kids	R2	A5	1	2	6	2	1	2	5	1	1	1	1	1	1	0	1	1	1
01-02-06-02-01-02-06.mp4	AV	Song	Fearful	Strong	Kids	R2	A6	1	2	6	2	1	2	6	0	0	0	1	1	0	0	1	1	1
01-02-06-02-01-02-07.mp4	AV	Song	Fearful	Strong	Kids	R2	A7	1	2	6	2	1	2	7	1	1	1	0	1	1	1	1	1	0
01-02-06-02-01-02-08.mp4	AV	Song	Fearful	Strong	Kids	R2	A8	1	2	6	2	1	2	8	0	1	0	1	1	1	1	1	1	1
01-02-06-02-01-02-09.mp4	AV	Song	Fearful	Strong	Kids	R2	A9	1	2	6	2	1	2	9	1	1	1	0	1	0	1	1	1	1
01-02-06-02-01-02-10.mp4	AV	Song	Fearful	Strong	Kids	R2	A10	1	2	6	2	1	2	10	0	1	1	0	1	1	0	1	1	0
01-02-06-02-01-02-11.mp4	AV	Song	Fearful	Strong	Kids	R2	A11	1	2	6	2	1	2	11	0	1	1	1	1	1	1	1	1	1
01-02-06-02-01-02-12.mp4	AV	Song	Fearful	Strong	Kids	R2	A12	1	2	6	2	1	2	12	1	1	1	1	1	1	1	1	1	1
01-02-06-02-01-02-13.mp4	AV	Song	Fearful	Strong	Kids	R2	A13	1	2	6	2	1	2	13	1	0	1	0	0	1	1	1	0	1
01-02-06-02-01-02-14.mp4	AV	Song	Fearful	Strong	Kids	R2	A14	1	2	6	2	1	2	14	1	1	1	1	1	1	1	1	1	1
01-02-06-02-01-02-15.mp4	AV	Song	Fearful	Strong	Kids	R2	A15	1	2	6	2	1	2	15	1	1	1	1	0	1	1	1	0	1
01-02-06-02-01-02-16.mp4	AV	Song	Fearful	Strong	Kids	R2	A16	1	2	6	2	1	2	16	1	1	1	1	1	1	0	1	0	1
01-02-06-02-01-02-17.mp4	AV	Song	Fearful	Strong	Kids	R2	A17	1	2	6	2	1	2	17	0	1	1	1	1	1	1	1	1	1
01-02-06-02-01-02-19.mp4	AV	Song	Fearful	Strong	Kids	R2	A19	1	2	6	2	1	2	19	1	0	1	0	1	1	1	1	1	1
01-02-06-02-01-02-20.mp4	AV	Song	Fearful	Strong	Kids	R2	A20	1	2	6	2	1	2	20	1	1	1	1	1	1	1	0	1	1
01-02-06-02-01-02-21.mp4	AV	Song	Fearful	Strong	Kids	R2	A21	1	2	6	2	1	2	21	1	1	1	0	1	1	1	0	1	0
01-02-06-02-01-02-22.mp4	AV	Song	Fearful	Strong	Kids	R2	A22	1	2	6	2	1	2	22	1	1	0	1	0	0	1	1	1	1
01-02-06-02-01-02-23.mp4	AV	Song	Fearful	Strong	Kids	R2	A23	1	2	6	2	1	2	23	1	1	1	1	1	1	0	1	1	1
01-02-06-02-01-02-24.mp4	AV	Song	Fearful	Strong	Kids	R2	A24	1	2	6	2	1	2	24	1	1	1	1	1	1	1	0	1	1
01-02-06-02-02-01-01.mp4	AV	Song	Fearful	Strong	Dogs	R1	A1	1	2	6	2	2	1	1	1	1	1	1	1	1	1	1	1	1
01-02-06-02-02-01-02.mp4	AV	Song	Fearful	Strong	Dogs	R1	A2	1	2	6	2	2	1	2	1	0	1	0	1	1	1	1	1	1
01-02-06-02-02-01-03.mp4	AV	Song	Fearful	Strong	Dogs	R1	A3	1	2	6	2	2	1	3	1	1	1	0	1	1	0	1	1	1
01-02-06-02-02-01-04.mp4	AV	Song	Fearful	Strong	Dogs	R1	A4	1	2	6	2	2	1	4	1	1	0	1	1	1	1	1	1	1
01-02-06-02-02-01-05.mp4	AV	Song	Fearful	Strong	Dogs	R1	A5	1	2	6	2	2	1	5	1	1	1	1	1	1	1	1	1	0
01-02-06-02-02-01-06.mp4	AV	Song	Fearful	Strong	Dogs	R1	A6	1	2	6	2	2	1	6	1	0	1	0	1	1	0	1	1	0
01-02-06-02-02-01-07.mp4	AV	Song	Fearful	Strong	Dogs	R1	A7	1	2	6	2	2	1	7	0	1	1	1	0	1	1	1	1	1
01-02-06-02-02-01-08.mp4	AV	Song	Fearful	Strong	Dogs	R1	A8	1	2	6	2	2	1	8	1	1	1	1	1	1	1	1	1	1
01-02-06-02-02-01-09.mp4	AV	Song	Fearful	Strong	Dogs	R1	A9	1	2	6	2	2	1	9	1	1	0	1	1	1	1	1	1	0
01-02-06-02-02-01-10.mp4	AV	Song	Fearful	Strong	Dogs	R1	A10	1	2	6	2	2	1	10	1	0	1	1	1	1	0	1	0	0
01-02-06-02-02-01-11.mp4	AV	Song	Fearful	Strong	Dogs	R1	A11	1	2	6	2	2	1	11	1	1	1	1	1	1	1	1	1	1
01-02-06-02-02-01-12.mp4	AV	Song	Fearful	Strong	Dogs	R1	A12	1	2	6	2	2	1	12	1	1	1	1	1	1	1	1	1	1
01-02-06-02-02-01-13.mp4	AV	Song	Fearful	Strong	Dogs	R1	A13	1	2	6	2	2	1	13	1	1	1	1	1	1	1	1	1	1
01-02-06-02-02-01-14.mp4	AV	Song	Fearful	Strong	Dogs	R1	A14	1	2	6	2	2	1	14	1	1	1	1	1	1	1	1	1	1
01-02-06-02-02-01-15.mp4	AV	Song	Fearful	Strong	Dogs	R1	A15	1	2	6	2	2	1	15	0	1	1	0	1	0	1	0	1	1
01-02-06-02-02-01-16.mp4	AV	Song	Fearful	Strong	Dogs	R1	A16	1	2	6	2	2	1	16	1	1	1	1	1	1	1	1	1	1
01-02-06-02-02-01-17.mp4	AV	Song	Fearful	Strong	Dogs	R1	A17	1	2	6	2	2	1	17	1	1	1	1	1	1	1	1	1	1
01-02-06-02-02-01-19.mp4	AV	Song	Fearful	Strong	Dogs	R1	A19	1	2	6	2	2	1	19	1	1	0	1	0	1	0	1	0	1
01-02-06-02-02-01-20.mp4	AV	Song	Fearful	Strong	Dogs	R1	A20	1	2	6	2	2	1	20	1	1	1	1	1	1	1	1	1	1
01-02-06-02-02-01-21.mp4	AV	Song	Fearful	Strong	Dogs	R1	A21	1	2	6	2	2	1	21	1	1	1	1	1	1	1	1	1	1
01-02-06-02-02-01-22.mp4	AV	Song	Fearful	Strong	Dogs	R1	A22	1	2	6	2	2	1	22	1	1	1	1	1	1	1	1	1	1
01-02-06-02-02-01-23.mp4	AV	Song	Fearful	Strong	Dogs	R1	A23	1	2	6	2	2	1	23	1	1	1	1	1	1	1	1	1	1
01-02-06-02-02-01-24.mp4	AV	Song	Fearful	Strong	Dogs	R1	A24	1	2	6	2	2	1	24	1	1	1	1	1	0	1	1	1	1
01-02-06-02-02-02-01.mp4	AV	Song	Fearful	Strong	Dogs	R2	A1	1	2	6	2	2	2	1	1	1	1	0	1	1	1	1	1	1
01-02-06-02-02-02-02.mp4	AV	Song	Fearful	Strong	Dogs	R2	A2	1	2	6	2	2	2	2	0	1	1	1	1	1	1	0	1	1
01-02-06-02-02-02-03.mp4	AV	Song	Fearful	Strong	Dogs	R2	A3	1	2	6	2	2	2	3	1	1	1	1	1	1	0	1	1	0
01-02-06-02-02-02-04.mp4	AV	Song	Fearful	Strong	Dogs	R2	A4	1	2	6	2	2	2	4	0	1	1	1	1	1	1	0	1	1
01-02-06-02-02-02-05.mp4	AV	Song	Fearful	Strong	Dogs	R2	A5	1	2	6	2	2	2	5	1	1	1	1	1	1	1	1	1	0
01-02-06-02-02-02-06.mp4	AV	Song	Fearful	Strong	Dogs	R2	A6	1	2	6	2	2	2	6	0	0	0	1	1	1	1	0	1	0
01-02-06-02-02-02-07.mp4	AV	Song	Fearful	Strong	Dogs	R2	A7	1	2	6	2	2	2	7	1	0	1	0	1	1	0	1	1	0
01-02-06-02-02-02-08.mp4	AV	Song	Fearful	Strong	Dogs	R2	A8	1	2	6	2	2	2	8	1	1	0	1	1	1	1	1	1	1
01-02-06-02-02-02-09.mp4	AV	Song	Fearful	Strong	Dogs	R2	A9	1	2	6	2	2	2	9	1	1	1	1	1	1	1	1	0	1
01-02-06-02-02-02-10.mp4	AV	Song	Fearful	Strong	Dogs	R2	A10	1	2	6	2	2	2	10	0	0	0	0	1	0	0	0	0	0
01-02-06-02-02-02-11.mp4	AV	Song	Fearful	Strong	Dogs	R2	A11	1	2	6	2	2	2	11	1	1	1	1	1	1	0	1	0	1
01-02-06-02-02-02-12.mp4	AV	Song	Fearful	Strong	Dogs	R2	A12	1	2	6	2	2	2	12	1	1	1	1	1	1	1	1	1	1
01-02-06-02-02-02-13.mp4	AV	Song	Fearful	Strong	Dogs	R2	A13	1	2	6	2	2	2	13	1	1	1	0	1	0	0	1	1	1
01-02-06-02-02-02-14.mp4	AV	Song	Fearful	Strong	Dogs	R2	A14	1	2	6	2	2	2	14	1	1	1	1	1	1	0	1	1	1
01-02-06-02-02-02-15.mp4	AV	Song	Fearful	Strong	Dogs	R2	A15	1	2	6	2	2	2	15	1	0	1	1	1	0	1	1	1	1
01-02-06-02-02-02-16.mp4	AV	Song	Fearful	Strong	Dogs	R2	A16	1	2	6	2	2	2	16	1	1	1	0	1	1	1	1	1	1
01-02-06-02-02-02-17.mp4	AV	Song	Fearful	Strong	Dogs	R2	A17	1	2	6	2	2	2	17	0	1	1	1	0	1	1	1	1	1
01-02-06-02-02-02-19.mp4	AV	Song	Fearful	Strong	Dogs	R2	A19	1	2	6	2	2	2	19	0	0	0	0	0	0	0	0	1	0
01-02-06-02-02-02-20.mp4	AV	Song	Fearful	Strong	Dogs	R2	A20	1	2	6	2	2	2	20	1	1	1	1	1	1	1	1	1	1
01-02-06-02-02-02-21.mp4	AV	Song	Fearful	Strong	Dogs	R2	A21	1	2	6	2	2	2	21	1	1	1	0	1	1	1	1	1	1
01-02-06-02-02-02-22.mp4	AV	Song	Fearful	Strong	Dogs	R2	A22	1	2	6	2	2	2	22	1	1	1	0	1	0	1	1	1	1
01-02-06-02-02-02-23.mp4	AV	Song	Fearful	Strong	Dogs	R2	A23	1	2	6	2	2	2	23	1	0	0	1	1	1	1	1	1	1
01-02-06-02-02-02-24.mp4	AV	Song	Fearful	Strong	Dogs	R2	A24	1	2	6	2	2	2	24	1	1	1	1	1	1	1	1	0	0
02-02-01-01-01-01-01.mp4	VO	Song	Neutral	Normal	Kids	R1	A1	2	2	1	1	1	1	1	1	0	1	0	0	0	0	1	0	0
02-02-01-01-01-01-02.mp4	VO	Song	Neutral	Normal	Kids	R1	A2	2	2	1	1	1	1	2	1	1	1	1	1	1	1	1	0	0
02-02-01-01-01-01-03.mp4	VO	Song	Neutral	Normal	Kids	R1	A3	2	2	1	1	1	1	3	0	1	1	0	0	0	0	0	1	0
02-02-01-01-01-01-04.mp4	VO	Song	Neutral	Normal	Kids	R1	A4	2	2	1	1	1	1	4	1	1	1	1	1	1	1	1	1	1
02-02-01-01-01-01-05.mp4	VO	Song	Neutral	Normal	Kids	R1	A5	2	2	1	1	1	1	5	0	0	1	1	1	1	0	0	1	1
02-02-01-01-01-01-06.mp4	VO	Song	Neutral	Normal	Kids	R1	A6	2	2	1	1	1	1	6	0	1	0	1	0	0	0	0	1	1
02-02-01-01-01-01-07.mp4	VO	Song	Neutral	Normal	Kids	R1	A7	2	2	1	1	1	1	7	1	1	0	1	1	1	0	0	0	1
02-02-01-01-01-01-08.mp4	VO	Song	Neutral	Normal	Kids	R1	A8	2	2	1	1	1	1	8	1	1	1	1	1	1	1	1	0	1
02-02-01-01-01-01-09.mp4	VO	Song	Neutral	Normal	Kids	R1	A9	2	2	1	1	1	1	9	1	1	1	1	1	1	1	1	1	1
02-02-01-01-01-01-10.mp4	VO	Song	Neutral	Normal	Kids	R1	A10	2	2	1	1	1	1	10	1	0	1	1	1	0	1	0	1	1
02-02-01-01-01-01-11.mp4	VO	Song	Neutral	Normal	Kids	R1	A11	2	2	1	1	1	1	11	0	1	1	1	1	1	1	1	1	1
02-02-01-01-01-01-12.mp4	VO	Song	Neutral	Normal	Kids	R1	A12	2	2	1	1	1	1	12	1	0	1	0	0	1	1	1	1	1
02-02-01-01-01-01-13.mp4	VO	Song	Neutral	Normal	Kids	R1	A13	2	2	1	1	1	1	13	1	1	1	1	1	1	1	1	1	1
02-02-01-01-01-01-14.mp4	VO	Song	Neutral	Normal	Kids	R1	A14	2	2	1	1	1	1	14	1	1	1	1	1	1	1	1	1	1
02-02-01-01-01-01-15.mp4	VO	Song	Neutral	Normal	Kids	R1	A15	2	2	1	1	1	1	15	1	1	1	1	1	1	1	1	1	1
02-02-01-01-01-01-16.mp4	VO	Song	Neutral	Normal	Kids	R1	A16	2	2	1	1	1	1	16	1	1	1	1	1	1	1	1	1	1
02-02-01-01-01-01-17.mp4	VO	Song	Neutral	Normal	Kids	R1	A17	2	2	1	1	1	1	17	1	0	0	1	0	0	0	0	1	0
02-02-01-01-01-01-19.mp4	VO	Song	Neutral	Normal	Kids	R1	A19	2	2	1	1	1	1	19	1	1	0	1	1	1	1	1	1	1
02-02-01-01-01-01-20.mp4	VO	Song	Neutral	Normal	Kids	R1	A20	2	2	1	1	1	1	20	1	1	1	1	1	0	1	1	1	1
02-02-01-01-01-01-21.mp4	VO	Song	Neutral	Normal	Kids	R1	A21	2	2	1	1	1	1	21	1	1	1	1	0	1	1	1	1	0
02-02-01-01-01-01-22.mp4	VO	Song	Neutral	Normal	Kids	R1	A22	2	2	1	1	1	1	22	1	1	1	0	1	1	1	1	1	1
02-02-01-01-01-01-23.mp4	VO	Song	Neutral	Normal	Kids	R1	A23	2	2	1	1	1	1	23	1	1	1	1	1	1	1	1	1	1
02-02-01-01-01-01-24.mp4	VO	Song	Neutral	Normal	Kids	R1	A24	2	2	1	1	1	1	24	1	1	0	1	1	1	1	0	1	1
02-02-01-01-01-02-01.mp4	VO	Song	Neutral	Normal	Kids	R2	A1	2	2	1	1	1	2	1	1	0	1	1	0	0	1	0	1	0
02-02-01-01-01-02-02.mp4	VO	Song	Neutral	Normal	Kids	R2	A2	2	2	1	1	1	2	2	0	1	1	1	1	0	0	1	1	0
02-02-01-01-01-02-03.mp4	VO	Song	Neutral	Normal	Kids	R2	A3	2	2	1	1	1	2	3	1	0	0	0	0	0	0	1	0	0
02-02-01-01-01-02-04.mp4	VO	Song	Neutral	Normal	Kids	R2	A4	2	2	1	1	1	2	4	0	1	1	1	1	1	1	1	1	1
02-02-01-01-01-02-05.mp4	VO	Song	Neutral	Normal	Kids	R2	A5	2	2	1	1	1	2	5	1	0	1	1	1	1	0	1	1	1
02-02-01-01-01-02-06.mp4	VO	Song	Neutral	Normal	Kids	R2	A6	2	2	1	1	1	2	6	1	1	1	0	1	1	1	1	1	1
02-02-01-01-01-02-07.mp4	VO	Song	Neutral	Normal	Kids	R2	A7	2	2	1	1	1	2	7	0	1	1	1	0	0	0	1	0	1
02-02-01-01-01-02-08.mp4	VO	Song	Neutral	Normal	Kids	R2	A8	2	2	1	1	1	2	8	1	1	1	1	1	1	1	1	0	1
02-02-01-01-01-02-09.mp4	VO	Song	Neutral	Normal	Kids	R2	A9	2	2	1	1	1	2	9	1	0	1	1	1	1	0	1	0	1
02-02-01-01-01-02-10.mp4	VO	Song	Neutral	Normal	Kids	R2	A10	2	2	1	1	1	2	10	1	0	0	1	1	1	1	0	1	0
02-02-01-01-01-02-11.mp4	VO	Song	Neutral	Normal	Kids	R2	A11	2	2	1	1	1	2	11	0	1	1	1	1	1	1	1	1	1
02-02-01-01-01-02-12.mp4	VO	Song	Neutral	Normal	Kids	R2	A12	2	2	1	1	1	2	12	0	0	1	0	1	0	0	1	1	0
02-02-01-01-01-02-13.mp4	VO	Song	Neutral	Normal	Kids	R2	A13	2	2	1	1	1	2	13	1	1	0	1	1	1	0	1	1	1
02-02-01-01-01-02-14.mp4	VO	Song	Neutral	Normal	Kids	R2	A14	2	2	1	1	1	2	14	0	1	1	1	1	1	1	1	0	1
02-02-01-01-01-02-15.mp4	VO	Song	Neutral	Normal	Kids	R2	A15	2	2	1	1	1	2	15	1	1	1	1	1	1	1	1	1	1
02-02-01-01-01-02-16.mp4	VO	Song	Neutral	Normal	Kids	R2	A16	2	2	1	1	1	2	16	1	0	1	1	1	1	1	0	1	1
02-02-01-01-01-02-17.mp4	VO	Song	Neutral	Normal	Kids	R2	A17	2	2	1	1	1	2	17	0	0	0	1	1	1	1	0	1	0
02-02-01-01-01-02-19.mp4	VO	Song	Neutral	Normal	Kids	R2	A19	2	2	1	1	1	2	19	1	1	0	1	1	1	1	1	0	1
02-02-01-01-01-02-20.mp4	VO	Song	Neutral	Normal	Kids	R2	A20	2	2	1	1	1	2	20	1	1	1	1	1	1	1	1	1	1
02-02-01-01-01-02-21.mp4	VO	Song	Neutral	Normal	Kids	R2	A21	2	2	1	1	1	2	21	1	1	1	1	1	0	1	1	1	1
02-02-01-01-01-02-22.mp4	VO	Song	Neutral	Normal	Kids	R2	A22	2	2	1	1	1	2	22	1	1	1	1	1	0	1	1	1	1
02-02-01-01-01-02-23.mp4	VO	Song	Neutral	Normal	Kids	R2	A23	2	2	1	1	1	2	23	1	1	1	1	1	1	0	1	1	1
02-02-01-01-01-02-24.mp4	VO	Song	Neutral	Normal	Kids	R2	A24	2	2	1	1	1	2	24	0	1	1	1	1	1	0	1	1	1
02-02-01-01-02-01-01.mp4	VO	Song	Neutral	Normal	Dogs	R1	A1	2	2	1	1	2	1	1	1	1	0	1	1	0	0	0	1	0
02-02-01-01-02-01-02.mp4	VO	Song	Neutral	Normal	Dogs	R1	A2	2	2	1	1	2	1	2	1	1	1	1	1	1	0	1	1	1
02-02-01-01-02-01-03.mp4	VO	Song	Neutral	Normal	Dogs	R1	A3	2	2	1	1	2	1	3	0	1	0	0	1	0	1	0	1	1
02-02-01-01-02-01-04.mp4	VO	Song	Neutral	Normal	Dogs	R1	A4	2	2	1	1	2	1	4	1	1	1	1	1	1	1	1	1	1
02-02-01-01-02-01-05.mp4	VO	Song	Neutral	Normal	Dogs	R1	A5	2	2	1	1	2	1	5	1	1	1	1	1	1	0	1	0	1
02-02-01-01-02-01-06.mp4	VO	Song	Neutral	Normal	Dogs	R1	A6	2	2	1	1	2	1	6	1	1	1	0	1	1	1	1	1	0
02-02-01-01-02-01-07.mp4	VO	Song	Neutral	Normal	Dogs	R1	A7	2	2	1	1	2	1	7	1	1	1	1	1	1	1	1	1	1
02-02-01-01-02-01-08.mp4	VO	Song	Neutral	Normal	Dogs	R1	A8	2	2	1	1	2	1	8	1	1	0	1	1	1	1	1	1	1
02-02-01-01-02-01-09.mp4	VO	Song	Neutral	Normal	Dogs	R1	A9	2	2	1	1	2	1	9	0	0	0	1	1	0	1	1	1	1
02-02-01-01-02-01-10.mp4	VO	Song	Neutral	Normal	Dogs	R1	A10	2	2	1	1	2	1	10	1	0	1	1	1	0	1	1	1	1
02-02-01-01-02-01-11.mp4	VO	Song	Neutral	Normal	Dogs	R1	A11	2	2	1	1	2	1	11	1	0	1	1	1	0	1	0	1	1
02-02-01-01-02-01-12.mp4	VO	Song	Neutral	Normal	Dogs	R1	A12	2	2	1	1	2	1	12	0	1	1	1	1	0	0	1	0	1
02-02-01-01-02-01-13.mp4	VO	Song	Neutral	Normal	Dogs	R1	A13	2	2	1	1	2	1	13	1	1	1	1	1	1	1	0	1	1
02-02-01-01-02-01-14.mp4	VO	Song	Neutral	Normal	Dogs	R1	A14	2	2	1	1	2	1	14	1	1	1	1	0	1	0	1	1	1
02-02-01-01-02-01-15.mp4	VO	Song	Neutral	Normal	Dogs	R1	A15	2	2	1	1	2	1	15	1	0	1	1	1	1	1	1	1	0
02-02-01-01-02-01-16.mp4	VO	Song	Neutral	Normal	Dogs	R1	A16	2	2	1	1	2	1	16	0	1	0	0	1	0	1	0	1	0
02-02-01-01-02-01-17.mp4	VO	Song	Neutral	Normal	Dogs	R1	A17	2	2	1	1	2	1	17	1	1	0	1	0	1	1	1	0	1
02-02-01-01-02-01-19.mp4	VO	Song	Neutral	Normal	Dogs	R1	A19	2	2	1	1	2	1	19	1	1	0	1	1	1	1	0	1	1
02-02-01-01-02-01-20.mp4	VO	Song	Neutral	Normal	Dogs	R1	A20	2	2	1	1	2	1	20	1	1	1	0	1	1	0	1	0	1
02-02-01-01-02-01-21.mp4	VO	Song	Neutral	Normal	Dogs	R1	A21	2	2	1	1	2	1	21	1	0	1	0	0	1	1	1	0	1
02-02-01-01-02-01-22.mp4	VO	Song	Neutral	Normal	Dogs	R1	A22	2	2	1	1	2	1	22	0	0	1	1	1	0	1	1	1	1
02-02-01-01-02-01-23.mp4	VO	Song	Neutral	Normal	Dogs	R1	A23	2	2	1	1	2	1	23	1	0	1	0	1	1	1	1	1	1
02-02-01-01-02-01-24.mp4	VO	Song	Neutral	Normal	Dogs	R1	A24	2	2	1	1	2	1	24	0	0	0	1	0	1	0	1	1	0
02-02-01-01-02-02-01.mp4	VO	Song	Neutral	Normal	Dogs	R2	A1	2	2	1	1	2	2	1	1	1	1	1	1	1	1	1	1	1
02-02-01-01-02-02-02.mp4	VO	Song	Neutral	Normal	Dogs	R2	A2	2	2	1	1	2	2	2	1	1	0	1	1	1	1	1	0	1
02-02-01-01-02-02-03.mp4	VO	Song	Neutral	Normal	Dogs	R2	A3	2	2	1	1	2	2	3	0	0	1	1	0	1	0	1	0	0
02-02-01-01-02-02-04.mp4	VO	Song	Neutral	Normal	Dogs	R2	A4	2	2	1	1	2	2	4	1	1	1	1	1	1	1	1	0	0
02-02-01-01-02-02-05.mp4	VO	Song	Neutral	Normal	Dogs	R2	A5	2	2	1	1	2	2	5	1	0	1	1	1	1	1	0	1	1
02-02-01-01-02-02-06.mp4	VO	Song	Neutral	Normal	Dogs	R2	A6	2	2	1	1	2	2	6	1	1	1	1	1	0	1	0	1	1
02-02-01-01-02-02-07.mp4	VO	Song	Neutral	Normal	Dogs	R2	A7	2	2	1	1	2	2	7	1	1	1	1	1	1	1	1	1	1
02-02-01-01-02-02-08.mp4	VO	Song	Neutral	Normal	Dogs	R2	A8	2	2	1	1	2	2	8	1	1	1	1	1	1	1	1	1	1
02-02-01-01-02-02-09.mp4	VO	Song	Neutral	Normal	Dogs	R2	A9	2	2	1	1	2	2	9	1	1	1	0	1	1	1	1	1	1
02-02-01-01-02-02-10.mp4	VO	Song	Neutral	Normal	Dogs	R2	A10	2	2	1	1	2	2	10	0	1	1	0	0	1	0	1	0	1
02-02-01-01-02-02-11.mp4	VO	Song	Neutral	Normal	Dogs	R2	A11	2	2	1	1	2	2	11	1	1	1	1	0	1	1	1	1	0
02-02-01-01-02-02-12.mp4	VO	Song	Neutral	Normal	Dogs	R2	A12	2	2	1	1	2	2	12	1	0	0	1	0	1	0	1	0	0
02-02-01-01-02-02-13.mp4	VO	Song	Neutral	Normal	Dogs	R2	A13	2	2	1	1	2	2	13	1	1	0	1	1	1	1	0	1	1
02-02-01-01-02-02-14.mp4	VO	Song	Neutral	Normal	Dogs	R2	A14	2	2	1	1	2	2	14	1	1	1	0	1	1	1	1	1	1
02-02-01-01-02-02-15.mp4	VO	Song	Neutral	Normal	Dogs	R2	A15	2	2	1	1	2	2	15	1	1	1	1	1	1	1	1	1	1
02-02-01-01-02-02-16.mp4	VO	Song	Neutral	Normal	Dogs	R2	A16	2	2	1	1	2	2	16	1	1	0	1	1	0	1	0	1	1
02-02-01-01-02-02-17.mp4	VO	Song	Neutral	Normal	Dogs	R2	A17	2	2	1	1	2	2	17	1	0	0	0	1	1	1	1	0	1
02-02-01-01-02-02-19.mp4	VO	Song	Neutral	Normal	Dogs	R2	A19	2	2	1	1	2	2	19	0	1	1	1	1	1	1	1	1	1
02-02-01-01-02-02-20.mp4	VO	Song	Neutral	Normal	Dogs	R2	A20	2	2	1	1	2	2	20	0	1	1	1	1	1	1	1	0	1
02-02-01-01-02-02-21.mp4	VO	Song	Neutral	Normal	Dogs	R2	A21	2	2	1	1	2	2	21	1	1	1	1	1	1	1	1	1	1
02-02-01-01-02-02-22.mp4	VO	Song	Neutral	Normal	Dogs	R2	A22	2	2	1	1	2	2	22	0	1	1	1	1	1	1	0	1	1
02-02-01-01-02-02-23.mp4	VO	Song	Neutral	Normal	Dogs	R2	A23	2	2	1	1	2	2	23	1	1	0	1	1	1	1	1	1	1
02-02-01-01-02-02-24.mp4	VO	Song	Neutral	Normal	Dogs	R2	A24	2	2	1	1	2	2	24	1	1	0	0	0	0	1	1	0	0
02-02-02-01-01-01-01.mp4	VO	Song	Calm	Normal	Kids	R1	A1	2	2	2	1	1	1	1	1	0	0	0	0	0	0	1	1	0
02-02-02-01-01-01-02.mp4	VO	Song	Calm	Normal	Kids	R1	A2	2	2	2	1	1	1	2	1	0	1	1	1	1	1	0	0	0
02-02-02-01-01-01-03.mp4	VO	Song	Calm	Normal	Kids	R1	A3	2	2	2	1	1	1	3	1	1	1	0	1	0	0	0	0	1
02-02-02-01-01-01-04.mp4	VO	Song	Calm	Normal	Kids	R1	A4	2	2	2	1	1	1	4	1	1	1	1	1	1	1	1	1	1
02-02-02-01-01-01-05.mp4	VO	Song	Calm	Normal	Kids	R1	A5	2	2	2	1	1	1	5	1	1	0	0	0	0	0	0	0	0
02-02-02-01-01-01-06.mp4	VO	Song	Calm	Normal	Kids	R1	A6	2	2	2	1	1	1	6	1	1	1	1	0	1	1	1	1	0
02-02-02-01-01-01-07.mp4	VO	Song	Calm	Normal	Kids	R1	A7	2	2	2	1	1	1	7	1	1	1	0	1	1	1	0	1	1
02-02-02-01-01-01-08.mp4	VO	Song	Calm	Normal	Kids	R1	A8	2	2	2	1	1	1	8	1	0	0	1	0	0	0	0	0	0
02-02-02-01-01-01-09.mp4	VO	Song	Calm	Normal	Kids	R1	A9	2	2	2	1	1	1	9	1	1	1	1	0	1	1	0	1	1
02-02-02-01-01-01-10.mp4	VO	Song	Calm	Normal	Kids	R1	A10	2	2	2	1	1	1	10	0	0	1	0	0	0	0	0	0	0
02-02-02-01-01-01-11.mp4	VO	Song	Calm	Normal	Kids	R1	A11	2	2	2	1	1	1	11	1	1	1	1	1	1	1	1	1	0
02-02-02-01-01-01-12.mp4	VO	Song	Calm	Normal	Kids	R1	A12	2	2	2	1	1	1	12	1	0	1	0	1	1	1	1	0	0
02-02-02-01-01-01-13.mp4	VO	Song	Calm	Normal	Kids	R1	A13	2	2	2	1	1	1	13	1	1	1	1	1	1	1	1	1	1
02-02-02-01-01-01-14.mp4	VO	Song	Calm	Normal	Kids	R1	A14	2	2	2	1	1	1	14	0	1	1	1	1	1	0	0	0	1
02-02-02-01-01-01-15.mp4	VO	Song	Calm	Normal	Kids	R1	A15	2	2	2	1	1	1	15	1	1	1	1	1	1	1	1	1	1
02-02-02-01-01-01-16.mp4	VO	Song	Calm	Normal	Kids	R1	A16	2	2	2	1	1	1	16	1	1	0	0	0	0	0	0	0	1
02-02-02-01-01-01-17.mp4	VO	Song	Calm	Normal	Kids	R1	A17	2	2	2	1	1	1	17	1	1	1	1	0	0	1	1	0	1
02-02-02-01-01-01-19.mp4	VO	Song	Calm	Normal	Kids	R1	A19	2	2	2	1	1	1	19	0	0	1	1	1	1	1	0	1	0
02-02-02-01-01-01-20.mp4	VO	Song	Calm	Normal	Kids	R1	A20	2	2	2	1	1	1	20	1	0	1	0	0	1	1	0	1	0
02-02-02-01-01-01-21.mp4	VO	Song	Calm	Normal	Kids	R1	A21	2	2	2	1	1	1	21	1	0	1	0	1	0	1	1	0	0
02-02-02-01-01-01-22.mp4	VO	Song	Calm	Normal	Kids	R1	A22	2	2	2	1	1	1	22	0	0	0	0	1	0	1	1	0	0
02-02-02-01-01-01-23.mp4	VO	Song	Calm	Normal	Kids	R1	A23	2	2	2	1	1	1	23	1	1	1	1	1	0	1	1	1	1
02-02-02-01-01-01-24.mp4	VO	Song	Calm	Normal	Kids	R1	A24	2	2	2	1	1	1	24	0	0	0	0	0	0	0	0	0	0
02-02-02-01-01-02-01.mp4	VO	Song	Calm	Normal	Kids	R2	A1	2	2	2	1	1	2	1	0	0	1	1	1	1	1	1	1	0
02-02-02-01-01-02-02.mp4	VO	Song	Calm	Normal	Kids	R2	A2	2	2	2	1	1	2	2	0	1	1	1	1	0	1	1	1	0
02-02-02-01-01-02-03.mp4	VO	Song	Calm	Normal	Kids	R2	A3	2	2	2	1	1	2	3	0	0	0	0	0	0	0	0	0	0
02-02-02-01-01-02-04.mp4	VO	Song	Calm	Normal	Kids	R2	A4	2	2	2	1	1	2	4	1	0	0	0	0	1	1	1	1	0
02-02-02-01-01-02-05.mp4	VO	Song	Calm	Normal	Kids	R2	A5	2	2	2	1	1	2	5	0	0	0	0	0	0	0	0	0	0
02-02-02-01-01-02-06.mp4	VO	Song	Calm	Normal	Kids	R2	A6	2	2	2	1	1	2	6	1	1	1	1	1	1	1	1	0	1
02-02-02-01-01-02-07.mp4	VO	Song	Calm	Normal	Kids	R2	A7	2	2	2	1	1	2	7	1	1	0	1	0	1	0	1	1	0
02-02-02-01-01-02-08.mp4	VO	Song	Calm	Normal	Kids	R2	A8	2	2	2	1	1	2	8	1	0	0	0	1	0	0	0	0	1
02-02-02-01-01-02-09.mp4	VO	Song	Calm	Normal	Kids	R2	A9	2	2	2	1	1	2	9	0	0	0	1	1	0	0	1	1	1
02-02-02-01-01-02-10.mp4	VO	Song	Calm	Normal	Kids	R2	A10	2	2	2	1	1	2	10	0	1	0	0	1	0	1	1	1	1
02-02-02-01-01-02-11.mp4	VO	Song	Calm	Normal	Kids	R2	A11	2	2	2	1	1	2	11	1	0	1	1	1	0	1	1	1	1
02-02-02-01-01-02-12.mp4	VO	Song	Calm	Normal	Kids	R2	A12	2	2	2	1	1	2	12	1	1	0	0	0	1	1	1	0	1
02-02-02-01-01-02-13.mp4	VO	Song	Calm	Normal	Kids	R2	A13	2	2	2	1	1	2	13	1	1	0	1	0	1	1	0	1	0
02-02-02-01-01-02-14.mp4	VO	Song	Calm	Normal	Kids	R2	A14	2	2	2	1	1	2	14	0	1	1	1	1	0	1	1	1	1
02-02-02-01-01-02-15.mp4	VO	Song	Calm	Normal	Kids	R2	A15	2	2	2	1	1	2	15	1	1	0	1	1	1	1	1	1	1
02-02-02-01-01-02-16.mp4	VO	Song	Calm	Normal	Kids	R2	A16	2	2	2	1	1	2	16	1	0	0	1	1	1	1	0	0	0
02-02-02-01-01-02-17.mp4	VO	Song	Calm	Normal	Kids	R2	A17	2	2	2	1	1	2	17	1	0	1	1	1	1	1	1	1	1
02-02-02-01-01-02-19.mp4	VO	Song	Calm	Normal	Kids	R2	A19	2	2	2	1	1	2	19	1	1	1	0	0	0	1	1	1	1
02-02-02-01-01-02-20.mp4	VO	Song	Calm	Normal	Kids	R2	A20	2	2	2	1	1	2	20	1	0	0	0	1	1	1	0	1	0
02-02-02-01-01-02-21.mp4	VO	Song	Calm	Normal	Kids	R2	A21	2	2	2	1	1	2	21	0	0	0	1	1	0	1	0	1	0
02-02-02-01-01-02-22.mp4	VO	Song	Calm	Normal	Kids	R2	A22	2	2	2	1	1	2	22	0	0	0	1	0	0	0	0	0	0
02-02-02-01-01-02-23.mp4	VO	Song	Calm	Normal	Kids	R2	A23	2	2	2	1	1	2	23	1	1	1	1	1	0	1	0	1	0
02-02-02-01-01-02-24.mp4	VO	Song	Calm	Normal	Kids	R2	A24	2	2	2	1	1	2	24	0	0	0	0	0	0	0	1	0	0
02-02-02-01-02-01-01.mp4	VO	Song	Calm	Normal	Dogs	R1	A1	2	2	2	1	2	1	1	1	0	1	0	1	1	1	1	0	0
02-02-02-01-02-01-02.mp4	VO	Song	Calm	Normal	Dogs	R1	A2	2	2	2	1	2	1	2	0	0	1	0	0	0	1	1	1	0
02-02-02-01-02-01-03.mp4	VO	Song	Calm	Normal	Dogs	R1	A3	2	2	2	1	2	1	3	0	0	0	0	0	0	0	0	0	0
02-02-02-01-02-01-04.mp4	VO	Song	Calm	Normal	Dogs	R1	A4	2	2	2	1	2	1	4	1	1	0	1	1	0	1	1	1	1
02-02-02-01-02-01-05.mp4	VO	Song	Calm	Normal	Dogs	R1	A5	2	2	2	1	2	1	5	0	1	1	0	1	0	0	1	1	0
02-02-02-01-02-01-06.mp4	VO	Song	Calm	Normal	Dogs	R1	A6	2	2	2	1	2	1	6	1	1	0	1	0	1	0	1	1	1
02-02-02-01-02-01-07.mp4	VO	Song	Calm	Normal	Dogs	R1	A7	2	2	2	1	2	1	7	1	1	1	0	1	1	0	1	1	1
02-02-02-01-02-01-08.mp4	VO	Song	Calm	Normal	Dogs	R1	A8	2	2	2	1	2	1	8	0	1	0	0	0	0	0	1	0	0
02-02-02-01-02-01-09.mp4	VO	Song	Calm	Normal	Dogs	R1	A9	2	2	2	1	2	1	9	1	1	1	1	1	0	1	0	1	0
02-02-02-01-02-01-10.mp4	VO	Song	Calm	Normal	Dogs	R1	A10	2	2	2	1	2	1	10	0	0	0	0	0	0	1	1	0	1
02-02-02-01-02-01-11.mp4	VO	Song	Calm	Normal	Dogs	R1	A11	2	2	2	1	2	1	11	1	0	0	1	1	1	1	1	0	1
02-02-02-01-02-01-12.mp4	VO	Song	Calm	Normal	Dogs	R1	A12	2	2	2	1	2	1	12	1	1	1	0	1	0	1	1	1	1
02-02-02-01-02-01-13.mp4	VO	Song	Calm	Normal	Dogs	R1	A13	2	2	2	1	2	1	13	1	1	1	1	1	1	0	1	1	1
02-02-02-01-02-01-14.mp4	VO	Song	Calm	Normal	Dogs	R1	A14	2	2	2	1	2	1	14	0	1	1	1	1	0	0	0	1	0
02-02-02-01-02-01-15.mp4	VO	Song	Calm	Normal	Dogs	R1	A15	2	2	2	1	2	1	15	1	1	1	1	0	1	1	1	0	1
02-02-02-01-02-01-16.mp4	VO	Song	Calm	Normal	Dogs	R1	A16	2	2	2	1	2	1	16	1	0	0	0	0	1	1	0	0	1
02-02-02-01-02-01-17.mp4	VO	Song	Calm	Normal	Dogs	R1	A17	2	2	2	1	2	1	17	1	0	1	1	1	1	1	0	1	1
02-02-02-01-02-01-19.mp4	VO	Song	Calm	Normal	Dogs	R1	A19	2	2	2	1	2	1	19	1	1	1	1	1	1	1	0	0	1
02-02-02-01-02-01-20.mp4	VO	Song	Calm	Normal	Dogs	R1	A20	2	2	2	1	2	1	20	0	0	0	1	0	0	0	0	0	0
02-02-02-01-02-01-21.mp4	VO	Song	Calm	Normal	Dogs	R1	A21	2	2	2	1	2	1	21	0	0	1	1	0	1	1	1	1	0
02-02-02-01-02-01-22.mp4	VO	Song	Calm	Normal	Dogs	R1	A22	2	2	2	1	2	1	22	1	1	1	1	1	0	0	1	1	0
02-02-02-01-02-01-23.mp4	VO	Song	Calm	Normal	Dogs	R1	A23	2	2	2	1	2	1	23	1	0	0	1	1	0	1	1	0	0
02-02-02-01-02-01-24.mp4	VO	Song	Calm	Normal	Dogs	R1	A24	2	2	2	1	2	1	24	0	0	1	0	0	1	0	0	0	1
02-02-02-01-02-02-01.mp4	VO	Song	Calm	Normal	Dogs	R2	A1	2	2	2	1	2	2	1	1	1	1	0	0	0	1	1	1	1
02-02-02-01-02-02-02.mp4	VO	Song	Calm	Normal	Dogs	R2	A2	2	2	2	1	2	2	2	1	1	1	1	0	1	1	1	1	1
02-02-02-01-02-02-03.mp4	VO	Song	Calm	Normal	Dogs	R2	A3	2	2	2	1	2	2	3	0	1	0	0	0	0	1	0	0	0
02-02-02-01-02-02-04.mp4	VO	Song	Calm	Normal	Dogs	R2	A4	2	2	2	1	2	2	4	0	1	1	1	0	1	1	1	0	1
02-02-02-01-02-02-05.mp4	VO	Song	Calm	Normal	Dogs	R2	A5	2	2	2	1	2	2	5	0	0	0	0	0	1	0	0	0	0
02-02-02-01-02-02-06.mp4	VO	Song	Calm	Normal	Dogs	R2	A6	2	2	2	1	2	2	6	1	1	0	1	0	0	1	1	1	1
02-02-02-01-02-02-07.mp4	VO	Song	Calm	Normal	Dogs	R2	A7	2	2	2	1	2	2	7	1	1	1	0	1	1	1	1	1	0
02-02-02-01-02-02-08.mp4	VO	Song	Calm	Normal	Dogs	R2	A8	2	2	2	1	2	2	8	0	1	0	0	0	0	0	1	0	0
02-02-02-01-02-02-09.mp4	VO	Song	Calm	Normal	Dogs	R2	A9	2	2	2	1	2	2	9	0	1	1	0	1	1	1	1	0	0
02-02-02-01-02-02-10.mp4	VO	Song	Calm	Normal	Dogs	R2	A10	2	2	2	1	2	2	10	0	0	0	1	0	0	0	0	0	1
02-02-02-01-02-02-11.mp4	VO	Song	Calm	Normal	Dogs	R2	A11	2	2	2	1	2	2	11	1	0	1	1	1	1	1	1	1	1
02-02-02-01-02-02-12.mp4	VO	Song	Calm	Normal	Dogs	R2	A12	2	2	2	1	2	2	12	1	1	1	0	0	1	0	1	1	0
02-02-02-01-02-02-13.mp4	VO	Song	Calm	Normal	Dogs	R2	A13	2	2	2	1	2	2	13	1	1	1	0	1	1	1	1	1	1
02-02-02-01-02-02-14.mp4	VO	Song	Calm	Normal	Dogs	R2	A14	2	2	2	1	2	2	14	0	1	1	1	0	1	1	1	1	1
02-02-02-01-02-02-15.mp4	VO	Song	Calm	Normal	Dogs	R2	A15	2	2	2	1	2	2	15	1	1	1	0	1	1	1	1	1	1
02-02-02-01-02-02-16.mp4	VO	Song	Calm	Normal	Dogs	R2	A16	2	2	2	1	2	2	16	1	0	1	0	0	0	1	0	1	1
02-02-02-01-02-02-17.mp4	VO	Song	Calm	Normal	Dogs	R2	A17	2	2	2	1	2	2	17	0	1	1	0	1	1	1	1	1	1
02-02-02-01-02-02-19.mp4	VO	Song	Calm	Normal	Dogs	R2	A19	2	2	2	1	2	2	19	1	1	1	1	1	1	1	1	1	1
02-02-02-01-02-02-20.mp4	VO	Song	Calm	Normal	Dogs	R2	A20	2	2	2	1	2	2	20	0	0	0	1	0	1	0	1	0	1
02-02-02-01-02-02-21.mp4	VO	Song	Calm	Normal	Dogs	R2	A21	2	2	2	1	2	2	21	1	1	1	1	1	1	1	1	1	1
02-02-02-01-02-02-22.mp4	VO	Song	Calm	Normal	Dogs	R2	A22	2	2	2	1	2	2	22	0	1	1	1	1	0	1	1	1	1
02-02-02-01-02-02-23.mp4	VO	Song	Calm	Normal	Dogs	R2	A23	2	2	2	1	2	2	23	1	0	1	1	1	0	1	1	1	1
02-02-02-01-02-02-24.mp4	VO	Song	Calm	Normal	Dogs	R2	A24	2	2	2	1	2	2	24	0	0	0	0	0	0	0	0	1	0
02-02-02-02-01-01-01.mp4	VO	Song	Calm	Strong	Kids	R1	A1	2	2	2	2	1	1	1	1	1	1	0	1	1	1	1	1	0
02-02-02-02-01-01-02.mp4	VO	Song	Calm	Strong	Kids	R1	A2	2	2	2	2	1	1	2	0	1	1	1	1	1	0	1	0	0
02-02-02-02-01-01-03.mp4	VO	Song	Calm	Strong	Kids	R1	A3	2	2	2	2	1	1	3	0	0	0	0	0	0	0	0	1	0
02-02-02-02-01-01-04.mp4	VO	Song	Calm	Strong	Kids	R1	A4	2	2	2	2	1	1	4	1	0	0	0	1	1	1	1	1	0
02-02-02-02-01-01-05.mp4	VO	Song	Calm	Strong	Kids	R1	A5	2	2	2	2	1	1	5	1	1	0	1	0	0	0	0	0	1
02-02-02-02-01-01-06.mp4	VO	Song	Calm	Strong	Kids	R1	A6	2	2	2	2	1	1	6	1	1	0	1	0	0	0	0	1	1
02-02-02-02-01-01-07.mp4	VO	Song	Calm	Strong	Kids	R1	A7	2	2	2	2	1	1	7	1	1	0	0	1	0	0	1	1	0
02-02-02-02-01-01-08.mp4	VO	Song	Calm	Strong	Kids	R1	A8	2	2	2	2	1	1	8	0	0	1	0	1	1	1	0	0	1
02-02-02-02-01-01-09.mp4	VO	Song	Calm	Strong	Kids	R1	A9	2	2	2	2	1	1	9	1	1	0	0	0	1	1	0	0	0
02-02-02-02-01-01-10.mp4	VO	Song	Calm	Strong	Kids	R1	A10	2	2	2	2	1	1	10	0	1	0	0	1	1	0	0	0	1
02-02-02-02-01-01-11.mp4	VO	Song	Calm	Strong	Kids	R1	A11	2	2	2	2	1	1	11	1	1	1	1	1	1	0	1	1	1
02-02-02-02-01-01-12.mp4	VO	Song	Calm	Strong	Kids	R1	A12	2	2	2	2	1	1	12	1	1	0	1	1	1	0	0	0	1
02-02-02-02-01-01-13.mp4	VO	Song	Calm	Strong	Kids	R1	A13	2	2	2	2	1	1	13	1	1	1	1	1	1	1	1	1	0
02-02-02-02-01-01-14.mp4	VO	Song	Calm	Strong	Kids	R1	A14	2	2	2	2	1	1	14	1	0	0	1	0	1	1	0	1	1
02-02-02-02-01-01-15.mp4	VO	Song	Calm	Strong	Kids	R1	A15	2	2	2	2	1	1	15	1	1	1	1	1	1	1	1	1	1
02-02-02-02-01-01-16.mp4	VO	Song	Calm	Strong	Kids	R1	A16	2	2	2	2	1	1	16	0	1	1	0	1	0	1	1	0	0
02-02-02-02-01-01-17.mp4	VO	Song	Calm	Strong	Kids	R1	A17	2	2	2	2	1	1	17	1	1	1	1	1	1	1	1	0	1
02-02-02-02-01-01-19.mp4	VO	Song	Calm	Strong	Kids	R1	A19	2	2	2	2	1	1	19	1	1	0	0	1	0	0	1	1	0
02-02-02-02-01-01-20.mp4	VO	Song	Calm	Strong	Kids	R1	A20	2	2	2	2	1	1	20	0	0	1	1	1	0	1	1	1	0
02-02-02-02-01-01-21.mp4	VO	Song	Calm	Strong	Kids	R1	A21	2	2	2	2	1	1	21	1	1	0	1	1	1	1	0	1	1
02-02-02-02-01-01-22.mp4	VO	Song	Calm	Strong	Kids	R1	A22	2	2	2	2	1	1	22	0	1	1	1	1	1	0	0	0	0
02-02-02-02-01-01-23.mp4	VO	Song	Calm	Strong	Kids	R1	A23	2	2	2	2	1	1	23	1	1	1	1	1	1	1	1	1	1
02-02-02-02-01-01-24.mp4	VO	Song	Calm	Strong	Kids	R1	A24	2	2	2	2	1	1	24	0	0	0	0	0	0	0	0	0	0
02-02-02-02-01-02-01.mp4	VO	Song	Calm	Strong	Kids	R2	A1	2	2	2	2	1	2	1	0	0	0	0	0	0	0	0	1	0
02-02-02-02-01-02-02.mp4	VO	Song	Calm	Strong	Kids	R2	A2	2	2	2	2	1	2	2	1	1	0	0	1	1	0	1	1	1
02-02-02-02-01-02-03.mp4	VO	Song	Calm	Strong	Kids	R2	A3	2	2	2	2	1	2	3	0	0	0	0	0	0	0	0	0	0
02-02-02-02-01-02-04.mp4	VO	Song	Calm	Strong	Kids	R2	A4	2	2	2	2	1	2	4	1	1	1	1	1	1	1	0	0	0
02-02-02-02-01-02-05.mp4	VO	Song	Calm	Strong	Kids	R2	A5	2	2	2	2	1	2	5	1	1	1	1	0	1	0	1	1	0
02-02-02-02-01-02-06.mp4	VO	Song	Calm	Strong	Kids	R2	A6	2	2	2	2	1	2	6	0	1	0	1	0	1	1	0	1	0
02-02-02-02-01-02-07.mp4	VO	Song	Calm	Strong	Kids	R2	A7	2	2	2	2	1	2	7	1	0	1	0	1	1	1	1	1	1
02-02-02-02-01-02-08.mp4	VO	Song	Calm	Strong	Kids	R2	A8	2	2	2	2	1	2	8	1	0	0	1	1	0	0	0	1	1
02-02-02-02-01-02-09.mp4	VO	Song	Calm	Strong	Kids	R2	A9	2	2	2	2	1	2	9	0	1	0	0	0	1	0	1	0	0
02-02-02-02-01-02-10.mp4	VO	Song	Calm	Strong	Kids	R2	A10	2	2	2	2	1	2	10	1	0	0	0	0	1	1	0	0	1
02-02-02-02-01-02-11.mp4	VO	Song	Calm	Strong	Kids	R2	A11	2	2	2	2	1	2	11	0	1	1	1	0	1	1	0	1	0
02-02-02-02-01-02-12.mp4	VO	Song	Calm	Strong	Kids	R2	A12	2	2	2	2	1	2	12	1	0	1	0	0	0	0	0	0	1
02-02-02-02-01-02-13.mp4	VO	Song	Calm	Strong	Kids	R2	A13	2	2	2	2	1	2	13	1	0	0	0	0	1	0	1	1	1
02-02-02-02-01-02-14.mp4	VO	Song	Calm	Strong	Kids	R2	A14	2	2	2	2	1	2	14	1	1	0	0	0	0	1	0	0	0
02-02-02-02-01-02-15.mp4	VO	Song	Calm	Strong	Kids	R2	A15	2	2	2	2	1	2	15	1	1	1	1	1	1	1	1	1	1
02-02-02-02-01-02-16.mp4	VO	Song	Calm	Strong	Kids	R2	A16	2	2	2	2	1	2	16	0	0	0	0	0	0	0	0	1	0
02-02-02-02-01-02-17.mp4	VO	Song	Calm	Strong	Kids	R2	A17	2	2	2	2	1	2	17	1	1	1	0	1	0	1	1	1	1
02-02-02-02-01-02-19.mp4	VO	Song	Calm	Strong	Kids	R2	A19	2	2	2	2	1	2	19	0	1	0	1	0	1	1	0	1	1
02-02-02-02-01-02-20.mp4	VO	Song	Calm	Strong	Kids	R2	A20	2	2	2	2	1	2	20	0	1	0	0	0	0	0	0	1	1
02-02-02-02-01-02-21.mp4	VO	Song	Calm	Strong	Kids	R2	A21	2	2	2	2	1	2	21	1	1	1	1	1	1	1	1	1	1
02-02-02-02-01-02-22.mp4	VO	Song	Calm	Strong	Kids	R2	A22	2	2	2	2	1	2	22	1	1	1	1	1	1	1	0	1	1
02-02-02-02-01-02-23.mp4	VO	Song	Calm	Strong	Kids	R2	A23	2	2	2	2	1	2	23	1	1	1	0	1	1	1	1	1	1
02-02-02-02-01-02-24.mp4	VO	Song	Calm	Strong	Kids	R2	A24	2	2	2	2	1	2	24	1	1	0	0	1	0	1	0	1	0
02-02-02-02-02-01-01.mp4	VO	Song	Calm	Strong	Dogs	R1	A1	2	2	2	2	2	1	1	0	1	0	1	1	0	0	1	1	0
02-02-02-02-02-01-02.mp4	VO	Song	Calm	Strong	Dogs	R1	A2	2	2	2	2	2	1	2	0	0	0	0	1	1	1	1	0	0
02-02-02-02-02-01-03.mp4	VO	Song	Calm	Strong	Dogs	R1	A3	2	2	2	2	2	1	3	0	0	0	0	0	0	0	0	1	0
02-02-02-02-02-01-04.mp4	VO	Song	Calm	Strong	Dogs	R1	A4	2	2	2	2	2	1	4	1	1	0	1	1	1	1	0	0	1
02-02-02-02-02-01-05.mp4	VO	Song	Calm	Strong	Dogs	R1	A5	2	2	2	2	2	1	5	0	1	0	1	1	0	1	1	0	0
02-02-02-02-02-01-06.mp4	VO	Song	Calm	Strong	Dogs	R1	A6	2	2	2	2	2	1	6	1	0	1	0	1	1	0	1	1	1
02-02-02-02-02-01-07.mp4	VO	Song	Calm	Strong	Dogs	R1	A7	2	2	2	2	2	1	7	1	1	0	1	1	1	1	1	1	1
02-02-02-02-02-01-08.mp4	VO	Song	Calm	Strong	Dogs	R1	A8	2	2	2	2	2	1	8	1	0	0	0	0	1	1	0	0	1
02-02-02-02-02-01-09.mp4	VO	Song	Calm	Strong	Dogs	R1	A9	2	2	2	2	2	1	9	0	0	0	1	0	1	0	0	0	1
02-02-02-02-02-01-10.mp4	VO	Song	Calm	Strong	Dogs	R1	A10	2	2	2	2	2	1	10	0	1	0	0	1	0	0	0	0	0
02-02-02-02-02-01-11.mp4	VO	Song	Calm	Strong	Dogs	R1	A11	2	2	2	2	2	1	11	1	1	0	0	1	1	0	1	1	1
02-02-02-02-02-01-12.mp4	VO	Song	Calm	Strong	Dogs	R1	A12	2	2	2	2	2	1	12	0	0	1	0	0	0	1	0	1	1
02-02-02-02-02-01-13.mp4	VO	Song	Calm	Strong	Dogs	R1	A13	2	2	2	2	2	1	13	1	1	1	1	1	1	1	1	1	1
02-02-02-02-02-01-14.mp4	VO	Song	Calm	Strong	Dogs	R1	A14	2	2	2	2	2	1	14	1	0	1	0	1	1	0	1	0	0
02-02-02-02-02-01-15.mp4	VO	Song	Calm	Strong	Dogs	R1	A15	2	2	2	2	2	1	15	1	1	0	1	1	1	1	0	1	0
02-02-02-02-02-01-16.mp4	VO	Song	Calm	Strong	Dogs	R1	A16	2	2	2	2	2	1	16	1	1	1	1	1	0	1	0	1	0
02-02-02-02-02-01-17.mp4	VO	Song	Calm	Strong	Dogs	R1	A17	2	2	2	2	2	1	17	1	1	1	1	1	1	1	0	1	1
02-02-02-02-02-01-19.mp4	VO	Song	Calm	Strong	Dogs	R1	A19	2	2	2	2	2	1	19	1	0	1	1	1	1	1	1	1	0
02-02-02-02-02-01-20.mp4	VO	Song	Calm	Strong	Dogs	R1	A20	2	2	2	2	2	1	20	1	1	1	1	1	1	1	0	1	1
02-02-02-02-02-01-21.mp4	VO	Song	Calm	Strong	Dogs	R1	A21	2	2	2	2	2	1	21	1	0	1	0	0	1	0	1	1	0
02-02-02-02-02-01-22.mp4	VO	Song	Calm	Strong	Dogs	R1	A22	2	2	2	2	2	1	22	0	1	0	1	1	1	0	1	1	1
02-02-02-02-02-01-23.mp4	VO	Song	Calm	Strong	Dogs	R1	A23	2	2	2	2	2	1	23	1	1	1	1	1	1	1	1	1	1
02-02-02-02-02-01-24.mp4	VO	Song	Calm	Strong	Dogs	R1	A24	2	2	2	2	2	1	24	0	0	0	1	1	0	0	1	0	0
02-02-02-02-02-02-01.mp4	VO	Song	Calm	Strong	Dogs	R2	A1	2	2	2	2	2	2	1	1	1	1	0	0	1	1	1	1	0
02-02-02-02-02-02-02.mp4	VO	Song	Calm	Strong	Dogs	R2	A2	2	2	2	2	2	2	2	1	0	0	1	0	1	0	0	1	1
02-02-02-02-02-02-03.mp4	VO	Song	Calm	Strong	Dogs	R2	A3	2	2	2	2	2	2	3	0	0	0	0	0	0	0	0	0	0
02-02-02-02-02-02-04.mp4	VO	Song	Calm	Strong	Dogs	R2	A4	2	2	2	2	2	2	4	0	1	1	1	1	1	1	1	0	1
02-02-02-02-02-02-05.mp4	VO	Song	Calm	Strong	Dogs	R2	A5	2	2	2	2	2	2	5	1	0	1	0	0	1	1	0	0	1
02-02-02-02-02-02-06.mp4	VO	Song	Calm	Strong	Dogs	R2	A6	2	2	2	2	2	2	6	1	1	1	1	1	1	1	1	0	1
02-02-02-02-02-02-07.mp4	VO	Song	Calm	Strong	Dogs	R2	A7	2	2	2	2	2	2	7	1	1	1	1	1	1	1	1	1	1
02-02-02-02-02-02-08.mp4	VO	Song	Calm	Strong	Dogs	R2	A8	2	2	2	2	2	2	8	0	0	0	1	0	0	1	0	0	0
02-02-02-02-02-02-09.mp4	VO	Song	Calm	Strong	Dogs	R2	A9	2	2	2	2	2	2	9	1	0	0	0	0	0	1	1	0	0
02-02-02-02-02-02-10.mp4	VO	Song	Calm	Strong	Dogs	R2	A10	2	2	2	2	2	2	10	0	0	1	0	0	0	0	1	0	1
02-02-02-02-02-02-11.mp4	VO	Song	Calm	Strong	Dogs	R2	A11	2	2	2	2	2	2	11	0	1	1	1	1	1	1	1	1	1
02-02-02-02-02-02-12.mp4	VO	Song	Calm	Strong	Dogs	R2	A12	2	2	2	2	2	2	12	0	0	1	1	1	1	1	0	1	0
02-02-02-02-02-02-13.mp4	VO	Song	Calm	Strong	Dogs	R2	A13	2	2	2	2	2	2	13	0	1	1	1	1	1	1	1	1	0
02-02-02-02-02-02-14.mp4	VO	Song	Calm	Strong	Dogs	R2	A14	2	2	2	2	2	2	14	1	1	1	1	0	1	0	1	0	1
02-02-02-02-02-02-15.mp4	VO	Song	Calm	Strong	Dogs	R2	A15	2	2	2	2	2	2	15	0	1	1	0	1	1	1	1	1	1
02-02-02-02-02-02-16.mp4	VO	Song	Calm	Strong	Dogs	R2	A16	2	2	2	2	2	2	16	0	1	0	0	1	0	0	0	0	1
02-02-02-02-02-02-17.mp4	VO	Song	Calm	Strong	Dogs	R2	A17	2	2	2	2	2	2	17	0	1	1	1	1	1	0	1	1	1
02-02-02-02-02-02-19.mp4	VO	Song	Calm	Strong	Dogs	R2	A19	2	2	2	2	2	2	19	1	0	1	0	0	0	0	1	0	0
02-02-02-02-02-02-20.mp4	VO	Song	Calm	Strong	Dogs	R2	A20	2	2	2	2	2	2	20	1	1	1	1	0	0	1	0	1	1
02-02-02-02-02-02-21.mp4	VO	Song	Calm	Strong	Dogs	R2	A21	2	2	2	2	2	2	21	1	1	1	1	1	1	1	1	1	1
02-02-02-02-02-02-22.mp4	VO	Song	Calm	Strong	Dogs	R2	A22	2	2	2	2	2	2	22	1	0	1	1	0	1	1	1	1	0
02-02-02-02-02-02-23.mp4	VO	Song	Calm	Strong	Dogs	R2	A23	2	2	2	2	2	2	23	1	1	1	0	1	1	1	1	1	1
02-02-02-02-02-02-24.mp4	VO	Song	Calm	Strong	Dogs	R2	A24	2	2	2	2	2	2	24	1	1	1	1	1	1	0	1	0	1
02-02-03-01-01-01-01.mp4	VO	Song	Happy	Normal	Kids	R1	A1	2	2	3	1	1	1	1	1	1	1	1	1	1	1	1	1	1
02-02-03-01-01-01-02.mp4	VO	Song	Happy	Normal	Kids	R1	A2	2	2	3	1	1	1	2	1	1	1	1	1	1	1	1	1	1
02-02-03-01-01-01-03.mp4	VO	Song	Happy	Normal	Kids	R1	A3	2	2	3	1	1	1	3	1	0	0	0	0	1	1	0	0	1
02-02-03-01-01-01-04.mp4	VO	Song	Happy	Normal	Kids	R1	A4	2	2	3	1	1	1	4	1	1	1	1	1	0	1	1	1	1
02-02-03-01-01-01-05.mp4	VO	Song	Happy	Normal	Kids	R1	A5	2	2	3	1	1	1	5	1	0	1	1	1	1	1	1	1	0
02-02-03-01-01-01-06.mp4	VO	Song	Happy	Normal	Kids	R1	A6	2	2	3	1	1	1	6	1	1	1	1	1	1	1	1	1	1
02-02-03-01-01-01-07.mp4	VO	Song	Happy	Normal	Kids	R1	A7	2	2	3	1	1	1	7	1	1	1	1	1	1	1	1	1	0
02-02-03-01-01-01-08.mp4	VO	Song	Happy	Normal	Kids	R1	A8	2	2	3	1	1	1	8	1	1	1	1	1	1	1	1	1	1
02-02-03-01-01-01-09.mp4	VO	Song	Happy	Normal	Kids	R1	A9	2	2	3	1	1	1	9	1	0	0	0	0	0	0	1	1	1
02-02-03-01-01-01-10.mp4	VO	Song	Happy	Normal	Kids	R1	A10	2	2	3	1	1	1	10	1	1	1	0	1	1	1	1	1	1
02-02-03-01-01-01-11.mp4	VO	Song	Happy	Normal	Kids	R1	A11	2	2	3	1	1	1	11	1	1	0	1	1	1	1	1	1	1
02-02-03-01-01-01-12.mp4	VO	Song	Happy	Normal	Kids	R1	A12	2	2	3	1	1	1	12	0	1	1	1	1	1	1	1	1	1
02-02-03-01-01-01-13.mp4	VO	Song	Happy	Normal	Kids	R1	A13	2	2	3	1	1	1	13	1	1	1	1	1	1	1	1	1	1
02-02-03-01-01-01-14.mp4	VO	Song	Happy	Normal	Kids	R1	A14	2	2	3	1	1	1	14	1	1	1	1	1	1	1	1	1	1
02-02-03-01-01-01-15.mp4	VO	Song	Happy	Normal	Kids	R1	A15	2	2	3	1	1	1	15	1	1	1	1	1	1	1	1	1	0
02-02-03-01-01-01-16.mp4	VO	Song	Happy	Normal	Kids	R1	A16	2	2	3	1	1	1	16	1	1	1	1	1	1	1	1	1	1
02-02-03-01-01-01-17.mp4	VO	Song	Happy	Normal	Kids	R1	A17	2	2	3	1	1	1	17	0	1	1	1	1	0	1	1	0	1
02-02-03-01-01-01-19.mp4	VO	Song	Happy	Normal	Kids	R1	A19	2	2	3	1	1	1	19	1	1	1	0	1	1	1	1	1	1
02-02-03-01-01-01-20.mp4	VO	Song	Happy	Normal	Kids	R1	A20	2	2	3	1	1	1	20	1	1	1	1	1	0	1	1	1	1
02-02-03-01-01-01-21.mp4	VO	Song	Happy	Normal	Kids	R1	A21	2	2	3	1	1	1	21	1	1	1	1	0	1	0	1	1	0
02-02-03-01-01-01-22.mp4	VO	Song	Happy	Normal	Kids	R1	A22	2	2	3	1	1	1	22	1	1	1	0	1	1	1	1	1	1
02-02-03-01-01-01-23.mp4	VO	Song	Happy	Normal	Kids	R1	A23	2	2	3	1	1	1	23	1	1	1	1	1	1	1	0	1	1
02-02-03-01-01-01-24.mp4	VO	Song	Happy	Normal	Kids	R1	A24	2	2	3	1	1	1	24	1	1	1	1	1	1	1	1	1	1
02-02-03-01-01-02-01.mp4	VO	Song	Happy	Normal	Kids	R2	A1	2	2	3	1	1	2	1	1	1	1	1	1	1	1	0	0	1
02-02-03-01-01-02-02.mp4	VO	Song	Happy	Normal	Kids	R2	A2	2	2	3	1	1	2	2	1	1	1	1	1	1	1	1	1	0
02-02-03-01-01-02-03.mp4	VO	Song	Happy	Normal	Kids	R2	A3	2	2	3	1	1	2	3	0	1	1	1	0	1	1	0	1	1
02-02-03-01-01-02-04.mp4	VO	Song	Happy	Normal	Kids	R2	A4	2	2	3	1	1	2	4	1	1	1	1	1	1	1	1	1	1
02-02-03-01-01-02-05.mp4	VO	Song	Happy	Normal	Kids	R2	A5	2	2	3	1	1	2	5	1	1	1	1	1	1	1	1	1	1
02-02-03-01-01-02-06.mp4	VO	Song	Happy	Normal	Kids	R2	A6	2	2	3	1	1	2	6	1	1	1	1	1	1	1	1	1	1
02-02-03-01-01-02-07.mp4	VO	Song	Happy	Normal	Kids	R2	A7	2	2	3	1	1	2	7	1	1	1	1	1	1	1	1	1	1
02-02-03-01-01-02-08.mp4	VO	Song	Happy	Normal	Kids	R2	A8	2	2	3	1	1	2	8	1	1	1	1	1	1	1	1	1	1
02-02-03-01-01-02-09.mp4	VO	Song	Happy	Normal	Kids	R2	A9	2	2	3	1	1	2	9	0	1	1	1	0	0	1	1	0	1
02-02-03-01-01-02-10.mp4	VO	Song	Happy	Normal	Kids	R2	A10	2	2	3	1	1	2	10	1	1	1	1	1	1	1	1	1	1
02-02-03-01-01-02-11.mp4	VO	Song	Happy	Normal	Kids	R2	A11	2	2	3	1	1	2	11	1	1	1	1	1	1	1	1	0	1
02-02-03-01-01-02-12.mp4	VO	Song	Happy	Normal	Kids	R2	A12	2	2	3	1	1	2	12	1	1	1	1	1	1	1	1	1	1
02-02-03-01-01-02-13.mp4	VO	Song	Happy	Normal	Kids	R2	A13	2	2	3	1	1	2	13	1	1	0	0	1	1	1	1	1	1
02-02-03-01-01-02-14.mp4	VO	Song	Happy	Normal	Kids	R2	A14	2	2	3	1	1	2	14	1	0	1	1	1	1	0	1	1	1
02-02-03-01-01-02-15.mp4	VO	Song	Happy	Normal	Kids	R2	A15	2	2	3	1	1	2	15	1	1	0	1	1	1	1	1	1	1
02-02-03-01-01-02-16.mp4	VO	Song	Happy	Normal	Kids	R2	A16	2	2	3	1	1	2	16	1	1	1	1	1	1	1	1	1	1
02-02-03-01-01-02-17.mp4	VO	Song	Happy	Normal	Kids	R2	A17	2	2	3	1	1	2	17	1	1	0	1	1	1	0	0	0	0
02-02-03-01-01-02-19.mp4	VO	Song	Happy	Normal	Kids	R2	A19	2	2	3	1	1	2	19	1	1	1	1	1	1	1	1	1	1
02-02-03-01-01-02-20.mp4	VO	Song	Happy	Normal	Kids	R2	A20	2	2	3	1	1	2	20	1	1	1	1	1	1	1	1	1	1
02-02-03-01-01-02-21.mp4	VO	Song	Happy	Normal	Kids	R2	A21	2	2	3	1	1	2	21	1	1	1	1	1	1	1	1	1	1
02-02-03-01-01-02-22.mp4	VO	Song	Happy	Normal	Kids	R2	A22	2	2	3	1	1	2	22	0	1	1	1	1	1	1	1	0	0
02-02-03-01-01-02-23.mp4	VO	Song	Happy	Normal	Kids	R2	A23	2	2	3	1	1	2	23	0	1	0	1	1	1	1	1	1	1
02-02-03-01-01-02-24.mp4	VO	Song	Happy	Normal	Kids	R2	A24	2	2	3	1	1	2	24	0	1	1	1	1	1	1	1	1	1
02-02-03-01-02-01-01.mp4	VO	Song	Happy	Normal	Dogs	R1	A1	2	2	3	1	2	1	1	1	1	1	1	1	1	1	0	1	1
02-02-03-01-02-01-02.mp4	VO	Song	Happy	Normal	Dogs	R1	A2	2	2	3	1	2	1	2	1	1	1	1	1	1	1	1	1	1
02-02-03-01-02-01-03.mp4	VO	Song	Happy	Normal	Dogs	R1	A3	2	2	3	1	2	1	3	1	0	1	1	1	1	0	1	0	1
02-02-03-01-02-01-04.mp4	VO	Song	Happy	Normal	Dogs	R1	A4	2	2	3	1	2	1	4	0	1	1	1	0	1	0	1	1	1
02-02-03-01-02-01-05.mp4	VO	Song	Happy	Normal	Dogs	R1	A5	2	2	3	1	2	1	5	1	1	1	1	1	1	0	1	1	1
02-02-03-01-02-01-06.mp4	VO	Song	Happy	Normal	Dogs	R1	A6	2	2	3	1	2	1	6	1	1	1	1	0	1	1	1	1	1
02-02-03-01-02-01-07.mp4	VO	Song	Happy	Normal	Dogs	R1	A7	2	2	3	1	2	1	7	1	0	1	1	1	1	1	1	0	1
02-02-03-01-02-01-08.mp4	VO	Song	Happy	Normal	Dogs	R1	A8	2	2	3	1	2	1	8	1	1	1	1	1	1	1	1	1	1
02-02-03-01-02-01-09.mp4	VO	Song	Happy	Normal	Dogs	R1	A9	2	2	3	1	2	1	9	1	1	1	1	1	1	1	1	1	1
02-02-03-01-02-01-10.mp4	VO	Song	Happy	Normal	Dogs	R1	A10	2	2	3	1	2	1	10	1	1	1	1	1	1	1	1	1	1
02-02-03-01-02-01-11.mp4	VO	Song	Happy	Normal	Dogs	R1	A11	2	2	3	1	2	1	11	1	1	1	1	1	1	1	0	1	1
02-02-03-01-02-01-12.mp4	VO	Song	Happy	Normal	Dogs	R1	A12	2	2	3	1	2	1	12	1	1	1	1	1	0	1	1	1	1
02-02-03-01-02-01-13.mp4	VO	Song	Happy	Normal	Dogs	R1	A13	2	2	3	1	2	1	13	1	1	1	1	1	1	1	1	1	1
02-02-03-01-02-01-14.mp4	VO	Song	Happy	Normal	Dogs	R1	A14	2	2	3	1	2	1	14	1	1	1	1	0	1	1	1	1	1
02-02-03-01-02-01-15.mp4	VO	Song	Happy	Normal	Dogs	R1	A15	2	2	3	1	2	1	15	1	1	1	1	1	1	1	1	1	1
02-02-03-01-02-01-16.mp4	VO	Song	Happy	Normal	Dogs	R1	A16	2	2	3	1	2	1	16	1	1	1	1	1	1	1	1	1	1
02-02-03-01-02-01-17.mp4	VO	Song	Happy	Normal	Dogs	R1	A17	2	2	3	1	2	1	17	1	1	1	1	0	1	0	0	1	1
02-02-03-01-02-01-19.mp4	VO	Song	Happy	Normal	Dogs	R1	A19	2	2	3	1	2	1	19	1	1	1	1	1	1	1	1	1	0
02-02-03-01-02-01-20.mp4	VO	Song	Happy	Normal	Dogs	R1	A20	2	2	3	1	2	1	20	1	1	1	0	1	1	0	1	1	1
02-02-03-01-02-01-21.mp4	VO	Song	Happy	Normal	Dogs	R1	A21	2	2	3	1	2	1	21	1	1	0	1	1	1	1	0	0	1
02-02-03-01-02-01-22.mp4	VO	Song	Happy	Normal	Dogs	R1	A22	2	2	3	1	2	1	22	1	1	1	1	1	1	1	1	1	1
02-02-03-01-02-01-23.mp4	VO	Song	Happy	Normal	Dogs	R1	A23	2	2	3	1	2	1	23	0	1	1	1	0	1	1	0	0	1
02-02-03-01-02-01-24.mp4	VO	Song	Happy	Normal	Dogs	R1	A24	2	2	3	1	2	1	24	1	1	1	1	1	1	0	1	1	1
02-02-03-01-02-02-01.mp4	VO	Song	Happy	Normal	Dogs	R2	A1	2	2	3	1	2	2	1	1	1	1	1	1	1	1	1	1	1
02-02-03-01-02-02-02.mp4	VO	Song	Happy	Normal	Dogs	R2	A2	2	2	3	1	2	2	2	0	1	1	1	1	1	1	1	1	1
02-02-03-01-02-02-03.mp4	VO	Song	Happy	Normal	Dogs	R2	A3	2	2	3	1	2	2	3	1	1	1	1	1	1	1	1	1	0
02-02-03-01-02-02-04.mp4	VO	Song	Happy	Normal	Dogs	R2	A4	2	2	3	1	2	2	4	1	1	1	0	1	1	1	1	1	1
02-02-03-01-02-02-05.mp4	VO	Song	Happy	Normal	Dogs	R2	A5	2	2	3	1	2	2	5	1	1	1	1	1	0	1	1	1	1
02-02-03-01-02-02-06.mp4	VO	Song	Happy	Normal	Dogs	R2	A6	2	2	3	1	2	2	6	1	1	1	0	0	1	1	0	0	1
02-02-03-01-02-02-07.mp4	VO	Song	Happy	Normal	Dogs	R2	A7	2	2	3	1	2	2	7	1	1	1	1	1	1	1	1	1	1
02-02-03-01-02-02-08.mp4	VO	Song	Happy	Normal	Dogs	R2	A8	2	2	3	1	2	2	8	1	1	1	1	1	1	1	1	1	1
02-02-03-01-02-02-09.mp4	VO	Song	Happy	Normal	Dogs	R2	A9	2	2	3	1	2	2	9	1	0	1	0	1	1	0	1	1	1
02-02-03-01-02-02-10.mp4	VO	Song	Happy	Normal	Dogs	R2	A10	2	2	3	1	2	2	10	1	1	1	1	1	1	1	1	1	1
02-02-03-01-02-02-11.mp4	VO	Song	Happy	Normal	Dogs	R2	A11	2	2	3	1	2	2	11	1	1	1	1	1	1	1	0	1	1
02-02-03-01-02-02-12.mp4	VO	Song	Happy	Normal	Dogs	R2	A12	2	2	3	1	2	2	12	1	1	1	1	1	1	1	1	1	1
02-02-03-01-02-02-13.mp4	VO	Song	Happy	Normal	Dogs	R2	A13	2	2	3	1	2	2	13	0	1	1	1	1	1	1	1	0	1
02-02-03-01-02-02-14.mp4	VO	Song	Happy	Normal	Dogs	R2	A14	2	2	3	1	2	2	14	1	1	1	1	1	0	1	1	1	1
02-02-03-01-02-02-15.mp4	VO	Song	Happy	Normal	Dogs	R2	A15	2	2	3	1	2	2	15	1	1	1	1	1	1	1	1	1	0
02-02-03-01-02-02-16.mp4	VO	Song	Happy	Normal	Dogs	R2	A16	2	2	3	1	2	2	16	1	1	1	1	1	1	1	1	1	1
02-02-03-01-02-02-17.mp4	VO	Song	Happy	Normal	Dogs	R2	A17	2	2	3	1	2	2	17	1	0	1	1	0	1	1	1	0	0
02-02-03-01-02-02-19.mp4	VO	Song	Happy	Normal	Dogs	R2	A19	2	2	3	1	2	2	19	1	1	1	1	1	1	1	1	0	1
02-02-03-01-02-02-20.mp4	VO	Song	Happy	Normal	Dogs	R2	A20	2	2	3	1	2	2	20	1	1	1	1	1	1	1	1	1	1
02-02-03-01-02-02-21.mp4	VO	Song	Happy	Normal	Dogs	R2	A21	2	2	3	1	2	2	21	1	1	0	1	0	1	1	1	1	1
02-02-03-01-02-02-22.mp4	VO	Song	Happy	Normal	Dogs	R2	A22	2	2	3	1	2	2	22	1	1	1	1	1	1	1	1	1	1
02-02-03-01-02-02-23.mp4	VO	Song	Happy	Normal	Dogs	R2	A23	2	2	3	1	2	2	23	1	1	1	1	1	1	1	1	1	1
02-02-03-01-02-02-24.mp4	VO	Song	Happy	Normal	Dogs	R2	A24	2	2	3	1	2	2	24	1	1	1	1	1	1	1	1	1	1
02-02-03-02-01-01-01.mp4	VO	Song	Happy	Strong	Kids	R1	A1	2	2	3	2	1	1	1	1	1	1	1	1	1	1	1	1	1
02-02-03-02-01-01-02.mp4	VO	Song	Happy	Strong	Kids	R1	A2	2	2	3	2	1	1	2	1	1	1	1	1	1	1	1	1	1
02-02-03-02-01-01-03.mp4	VO	Song	Happy	Strong	Kids	R1	A3	2	2	3	2	1	1	3	0	1	0	1	1	0	1	1	0	0
02-02-03-02-01-01-04.mp4	VO	Song	Happy	Strong	Kids	R1	A4	2	2	3	2	1	1	4	1	1	1	1	1	1	1	1	1	1
02-02-03-02-01-01-05.mp4	VO	Song	Happy	Strong	Kids	R1	A5	2	2	3	2	1	1	5	1	1	0	0	1	1	1	1	1	0
02-02-03-02-01-01-06.mp4	VO	Song	Happy	Strong	Kids	R1	A6	2	2	3	2	1	1	6	1	1	1	1	1	1	1	1	1	1
02-02-03-02-01-01-07.mp4	VO	Song	Happy	Strong	Kids	R1	A7	2	2	3	2	1	1	7	1	1	1	1	1	1	1	1	1	1
02-02-03-02-01-01-08.mp4	VO	Song	Happy	Strong	Kids	R1	A8	2	2	3	2	1	1	8	1	1	1	1	1	1	1	1	1	1
02-02-03-02-01-01-09.mp4	VO	Song	Happy	Strong	Kids	R1	A9	2	2	3	2	1	1	9	1	1	1	1	0	1	1	1	1	1
02-02-03-02-01-01-10.mp4	VO	Song	Happy	Strong	Kids	R1	A10	2	2	3	2	1	1	10	1	1	1	1	1	1	1	1	1	1
02-02-03-02-01-01-11.mp4	VO	Song	Happy	Strong	Kids	R1	A11	2	2	3	2	1	1	11	1	1	1	1	1	0	1	1	1	1
02-02-03-02-01-01-12.mp4	VO	Song	Happy	Strong	Kids	R1	A12	2	2	3	2	1	1	12	1	1	1	1	1	1	1	1	1	1
02-02-03-02-01-01-13.mp4	VO	Song	Happy	Strong	Kids	R1	A13	2	2	3	2	1	1	13	1	1	1	1	1	1	1	1	1	1
02-02-03-02-01-01-14.mp4	VO	Song	Happy	Strong	Kids	R1	A14	2	2	3	2	1	1	14	1	0	1	1	1	1	1	1	1	0
02-02-03-02-01-01-15.mp4	VO	Song	Happy	Strong	Kids	R1	A15	2	2	3	2	1	1	15	1	1	1	1	1	1	1	1	1	1
02-02-03-02-01-01-16.mp4	VO	Song	Happy	Strong	Kids	R1	A16	2	2	3	2	1	1	16	1	1	1	1	1	1	1	1	1	1
02-02-03-02-01-01-17.mp4	VO	Song	Happy	Strong	Kids	R1	A17	2	2	3	2	1	1	17	0	1	1	1	1	1	1	1	1	1
02-02-03-02-01-01-19.mp4	VO	Song	Happy	Strong	Kids	R1	A19	2	2	3	2	1	1	19	1	1	1	1	1	1	1	1	1	1
02-02-03-02-01-01-20.mp4	VO	Song	Happy	Strong	Kids	R1	A20	2	2	3	2	1	1	20	1	1	1	1	1	0	1	1	1	1
02-02-03-02-01-01-21.mp4	VO	Song	Happy	Strong	Kids	R1	A21	2	2	3	2	1	1	21	1	1	1	1	1	1	1	1	1	1
02-02-03-02-01-01-22.mp4	VO	Song	Happy	Strong	Kids	R1	A22	2	2	3	2	1	1	22	1	1	1	1	1	1	1	1	1	1
02-02-03-02-01-01-23.mp4	VO	Song	Happy	Strong	Kids	R1	A23	2	2	3	2	1	1	23	1	0	1	1	1	0	1	1	1	1
02-02-03-02-01-01-24.mp4	VO	Song	Happy	Strong	Kids	R1	A24	2	2	3	2	1	1	24	1	1	1	1	1	1	1	1	1	1
02-02-03-02-01-02-01.mp4	VO	Song	Happy	Strong	Kids	R2	A1	2	2	3	2	1	2	1	1	1	1	1	1	1	1	1	1	1
02-02-03-02-01-02-02.mp4	VO	Song	Happy	Strong	Kids	R2	A2	2	2	3	2	1	2	2	1	1	1	1	1	1	1	1	1	1
02-02-03-02-01-02-03.mp4	VO	Song	Happy	Strong	Kids	R2	A3	2	2	3	2	1	2	3	0	0	0	1	1	1	1	0	1	0
02-02-03-02-01-02-04.mp4	VO	Song	Happy	Strong	Kids	R2	A4	2	2	3	2	1	2	4	1	1	1	1	1	1	1	0	1	0
02-02-03-02-01-02-05.mp4	VO	Song	Happy	Strong	Kids	R2	A5	2	2	3	2	1	2	5	0	1	1	1	1	1	1	1	0	1
02-02-03-02-01-02-06.mp4	VO	Song	Happy	Strong	Kids	R2	A6	2	2	3	2	1	2	6	1	1	1	1	1	1	1	1	1	1
02-02-03-02-01-02-07.mp4	VO	Song	Happy	Strong	Kids	R2	A7	2	2	3	2	1	2	7	1	1	1	1	0	1	1	1	1	1
02-02-03-02-01-02-08.mp4	VO	Song	Happy	Strong	Kids	R2	A8	2	2	3	2	1	2	8	1	1	1	1	1	1	1	1	1	1
02-02-03-02-01-02-09.mp4	VO	Song	Happy	Strong	Kids	R2	A9	2	2	3	2	1	2	9	1	1	1	1	0	0	1	1	1	1
02-02-03-02-01-02-10.mp4	VO	Song	Happy	Strong	Kids	R2	A10	2	2	3	2	1	2	10	1	1	1	1	1	1	1	1	1	1
02-02-03-02-01-02-11.mp4	VO	Song	Happy	Strong	Kids	R2	A11	2	2	3	2	1	2	11	1	1	1	1	1	1	1	1	1	1
02-02-03-02-01-02-12.mp4	VO	Song	Happy	Strong	Kids	R2	A12	2	2	3	2	1	2	12	1	0	1	1	1	1	1	1	1	1
02-02-03-02-01-02-13.mp4	VO	Song	Happy	Strong	Kids	R2	A13	2	2	3	2	1	2	13	1	1	1	1	1	1	1	1	1	1
02-02-03-02-01-02-14.mp4	VO	Song	Happy	Strong	Kids	R2	A14	2	2	3	2	1	2	14	1	1	1	0	1	1	1	1	1	0
02-02-03-02-01-02-15.mp4	VO	Song	Happy	Strong	Kids	R2	A15	2	2	3	2	1	2	15	1	1	1	1	1	1	1	1	1	1
02-02-03-02-01-02-16.mp4	VO	Song	Happy	Strong	Kids	R2	A16	2	2	3	2	1	2	16	1	1	1	1	1	1	1	1	1	1
02-02-03-02-01-02-17.mp4	VO	Song	Happy	Strong	Kids	R2	A17	2	2	3	2	1	2	17	1	1	1	1	1	1	1	1	1	1
02-02-03-02-01-02-19.mp4	VO	Song	Happy	Strong	Kids	R2	A19	2	2	3	2	1	2	19	1	1	1	1	1	1	1	1	1	1
02-02-03-02-01-02-20.mp4	VO	Song	Happy	Strong	Kids	R2	A20	2	2	3	2	1	2	20	1	1	1	1	1	0	0	0	1	1
02-02-03-02-01-02-21.mp4	VO	Song	Happy	Strong	Kids	R2	A21	2	2	3	2	1	2	21	1	1	1	1	1	1	1	0	1	1
02-02-03-02-01-02-22.mp4	VO	Song	Happy	Strong	Kids	R2	A22	2	2	3	2	1	2	22	1	1	1	1	1	1	1	1	1	1
02-02-03-02-01-02-23.mp4	VO	Song	Happy	Strong	Kids	R2	A23	2	2	3	2	1	2	23	1	1	1	1	1	1	0	1	0	1
02-02-03-02-01-02-24.mp4	VO	Song	Happy	Strong	Kids	R2	A24	2	2	3	2	1	2	24	1	1	1	1	1	1	1	1	1	1
02-02-03-02-02-01-01.mp4	VO	Song	Happy	Strong	Dogs	R1	A1	2	2	3	2	2	1	1	1	1	1	1	1	0	1	1	1	1
02-02-03-02-02-01-02.mp4	VO	Song	Happy	Strong	Dogs	R1	A2	2	2	3	2	2	1	2	1	1	1	1	1	1	1	1	1	1
02-02-03-02-02-01-03.mp4	VO	Song	Happy	Strong	Dogs	R1	A3	2	2	3	2	2	1	3	1	1	0	1	1	1	0	1	0	1
02-02-03-02-02-01-04.mp4	VO	Song	Happy	Strong	Dogs	R1	A4	2	2	3	2	2	1	4	1	0	1	1	1	1	1	1	1	1
02-02-03-02-02-01-05.mp4	VO	Song	Happy	Strong	Dogs	R1	A5	2	2	3	2	2	1	5	1	1	0	0	1	0	1	1	1	1
02-02-03-02-02-01-06.mp4	VO	Song	Happy	Strong	Dogs	R1	A6	2	2	3	2	2	1	6	0	1	1	1	1	1	1	0	0	1
02-02-03-02-02-01-07.mp4	VO	Song	Happy	Strong	Dogs	R1	A7	2	2	3	2	2	1	7	1	1	1	1	1	1	1	1	1	1
02-02-03-02-02-01-08.mp4	VO	Song	Happy	Strong	Dogs	R1	A8	2	2	3	2	2	1	8	1	1	1	1	1	1	1	1	1	1
02-02-03-02-02-01-09.mp4	VO	Song	Happy	Strong	Dogs	R1	A9	2	2	3	2	2	1	9	0	1	1	0	0	1	1	0	1	0
02-02-03-02-02-01-10.mp4	VO	Song	Happy	Strong	Dogs	R1	A10	2	2	3	2	2	1	10	1	1	1	1	1	1	1	1	0	1
02-02-03-02-02-01-11.mp4	VO	Song	Happy	Strong	Dogs	R1	A11	2	2	3	2	2	1	11	1	1	1	1	1	1	1	1	1	1
02-02-03-02-02-01-12.mp4	VO	Song	Happy	Strong	Dogs	R1	A12	2	2	3	2	2	1	12	1	1	1	1	1	1	1	1	1	1
02-02-03-02-02-01-13.mp4	VO	Song	Happy	Strong	Dogs	R1	A13	2	2	3	2	2	1	13	1	1	1	1	1	1	1	1	1	1
02-02-03-02-02-01-14.mp4	VO	Song	Happy	Strong	Dogs	R1	A14	2	2	3	2	2	1	14	1	1	1	1	1	0	1	1	1	1
02-02-03-02-02-01-15.mp4	VO	Song	Happy	Strong	Dogs	R1	A15	2	2	3	2	2	1	15	1	1	1	0	1	0	1	1	0	1
02-02-03-02-02-01-16.mp4	VO	Song	Happy	Strong	Dogs	R1	A16	2	2	3	2	2	1	16	1	1	0	1	1	1	1	1	1	1
02-02-03-02-02-01-17.mp4	VO	Song	Happy	Strong	Dogs	R1	A17	2	2	3	2	2	1	17	0	1	1	0	1	1	1	1	1	1
02-02-03-02-02-01-19.mp4	VO	Song	Happy	Strong	Dogs	R1	A19	2	2	3	2	2	1	19	1	1	0	1	1	1	1	1	1	1
02-02-03-02-02-01-20.mp4	VO	Song	Happy	Strong	Dogs	R1	A20	2	2	3	2	2	1	20	1	1	1	1	1	1	1	1	1	1
02-02-03-02-02-01-21.mp4	VO	Song	Happy	Strong	Dogs	R1	A21	2	2	3	2	2	1	21	1	1	1	0	1	1	1	1	1	0
02-02-03-02-02-01-22.mp4	VO	Song	Happy	Strong	Dogs	R1	A22	2	2	3	2	2	1	22	1	1	1	1	1	1	1	1	1	1
02-02-03-02-02-01-23.mp4	VO	Song	Happy	Strong	Dogs	R1	A23	2	2	3	2	2	1	23	1	1	1	1	1	1	0	0	1	1
02-02-03-02-02-01-24.mp4	VO	Song	Happy	Strong	Dogs	R1	A24	2	2	3	2	2	1	24	1	1	1	1	1	1	1	1	1	1
02-02-03-02-02-02-01.mp4	VO	Song	Happy	Strong	Dogs	R2	A1	2	2	3	2	2	2	1	1	1	1	1	1	1	1	1	1	1
02-02-03-02-02-02-02.mp4	VO	Song	Happy	Strong	Dogs	R2	A2	2	2	3	2	2	2	2	1	1	1	1	1	1	1	1	1	1
02-02-03-02-02-02-03.mp4	VO	Song	Happy	Strong	Dogs	R2	A3	2	2	3	2	2	2	3	1	1	1	0	0	0	1	1	1	1
02-02-03-02-02-02-04.mp4	VO	Song	Happy	Strong	Dogs	R2	A4	2	2	3	2	2	2	4	0	1	1	1	0	1	1	1	0	1
02-02-03-02-02-02-05.mp4	VO	Song	Happy	Strong	Dogs	R2	A5	2	2	3	2	2	2	5	1	1	1	0	0	1	1	1	1	0
02-02-03-02-02-02-06.mp4	VO	Song	Happy	Strong	Dogs	R2	A6	2	2	3	2	2	2	6	0	1	1	1	1	1	1	1	1	1
02-02-03-02-02-02-07.mp4	VO	Song	Happy	Strong	Dogs	R2	A7	2	2	3	2	2	2	7	1	1	1	1	1	1	1	1	0	1
02-02-03-02-02-02-08.mp4	VO	Song	Happy	Strong	Dogs	R2	A8	2	2	3	2	2	2	8	1	1	1	1	1	1	1	1	1	1
02-02-03-02-02-02-09.mp4	VO	Song	Happy	Strong	Dogs	R2	A9	2	2	3	2	2	2	9	1	1	1	1	0	1	1	1	1	1
02-02-03-02-02-02-10.mp4	VO	Song	Happy	Strong	Dogs	R2	A10	2	2	3	2	2	2	10	1	1	1	1	1	1	0	1	1	0
02-02-03-02-02-02-11.mp4	VO	Song	Happy	Strong	Dogs	R2	A11	2	2	3	2	2	2	11	1	1	1	1	1	1	1	0	1	1
02-02-03-02-02-02-12.mp4	VO	Song	Happy	Strong	Dogs	R2	A12	2	2	3	2	2	2	12	1	1	1	1	1	1	1	1	1	1
02-02-03-02-02-02-13.mp4	VO	Song	Happy	Strong	Dogs	R2	A13	2	2	3	2	2	2	13	1	1	1	1	1	1	1	1	1	1
02-02-03-02-02-02-14.mp4	VO	Song	Happy	Strong	Dogs	R2	A14	2	2	3	2	2	2	14	1	1	1	1	1	0	1	1	1	1
02-02-03-02-02-02-15.mp4	VO	Song	Happy	Strong	Dogs	R2	A15	2	2	3	2	2	2	15	1	1	1	1	1	1	1	1	1	1
02-02-03-02-02-02-16.mp4	VO	Song	Happy	Strong	Dogs	R2	A16	2	2	3	2	2	2	16	1	1	1	0	1	1	1	1	1	1
02-02-03-02-02-02-17.mp4	VO	Song	Happy	Strong	Dogs	R2	A17	2	2	3	2	2	2	17	1	1	1	1	1	1	1	1	1	1
02-02-03-02-02-02-19.mp4	VO	Song	Happy	Strong	Dogs	R2	A19	2	2	3	2	2	2	19	1	1	1	1	1	1	1	1	1	1
02-02-03-02-02-02-20.mp4	VO	Song	Happy	Strong	Dogs	R2	A20	2	2	3	2	2	2	20	1	1	1	1	0	1	0	1	1	1
02-02-03-02-02-02-21.mp4	VO	Song	Happy	Strong	Dogs	R2	A21	2	2	3	2	2	2	21	1	1	1	1	1	1	1	1	1	1
02-02-03-02-02-02-22.mp4	VO	Song	Happy	Strong	Dogs	R2	A22	2	2	3	2	2	2	22	1	1	1	1	1	1	1	1	1	1
02-02-03-02-02-02-23.mp4	VO	Song	Happy	Strong	Dogs	R2	A23	2	2	3	2	2	2	23	1	1	1	1	1	1	1	1	0	1
02-02-03-02-02-02-24.mp4	VO	Song	Happy	Strong	Dogs	R2	A24	2	2	3	2	2	2	24	0	1	1	1	1	1	0	1	1	1
02-02-04-01-01-01-01.mp4	VO	Song	Sad	Normal	Kids	R1	A1	2	2	4	1	1	1	1	1	1	1	1	1	1	1	1	1	1
02-02-04-01-01-01-02.mp4	VO	Song	Sad	Normal	Kids	R1	A2	2	2	4	1	1	1	2	1	1	0	0	0	1	0	0	1	1
02-02-04-01-01-01-03.mp4	VO	Song	Sad	Normal	Kids	R1	A3	2	2	4	1	1	1	3	1	1	1	1	1	1	1	1	1	1
02-02-04-01-01-01-04.mp4	VO	Song	Sad	Normal	Kids	R1	A4	2	2	4	1	1	1	4	1	0	1	1	1	0	0	0	0	1
02-02-04-01-01-01-05.mp4	VO	Song	Sad	Normal	Kids	R1	A5	2	2	4	1	1	1	5	1	0	0	1	0	1	0	1	1	1
02-02-04-01-01-01-06.mp4	VO	Song	Sad	Normal	Kids	R1	A6	2	2	4	1	1	1	6	1	0	1	1	1	1	1	1	1	1
02-02-04-01-01-01-07.mp4	VO	Song	Sad	Normal	Kids	R1	A7	2	2	4	1	1	1	7	1	1	1	1	1	1	1	1	1	1
02-02-04-01-01-01-08.mp4	VO	Song	Sad	Normal	Kids	R1	A8	2	2	4	1	1	1	8	1	1	1	1	1	1	1	1	1	1
02-02-04-01-01-01-09.mp4	VO	Song	Sad	Normal	Kids	R1	A9	2	2	4	1	1	1	9	1	1	1	1	1	1	1	1	0	1
02-02-04-01-01-01-10.mp4	VO	Song	Sad	Normal	Kids	R1	A10	2	2	4	1	1	1	10	1	1	1	1	1	1	1	1	1	1
02-02-04-01-01-01-11.mp4	VO	Song	Sad	Normal	Kids	R1	A11	2	2	4	1	1	1	11	1	0	1	1	1	1	0	1	0	0
02-02-04-01-01-01-12.mp4	VO	Song	Sad	Normal	Kids	R1	A12	2	2	4	1	1	1	12	0	0	1	1	0	1	1	1	1	1
02-02-04-01-01-01-13.mp4	VO	Song	Sad	Normal	Kids	R1	A13	2	2	4	1	1	1	13	0	0	0	0	0	0	1	0	0	0
02-02-04-01-01-01-14.mp4	VO	Song	Sad	Normal	Kids	R1	A14	2	2	4	1	1	1	14	1	1	1	1	1	1	1	0	1	0
02-02-04-01-01-01-15.mp4	VO	Song	Sad	Normal	Kids	R1	A15	2	2	4	1	1	1	15	1	0	1	1	0	0	1	0	1	0
02-02-04-01-01-01-16.mp4	VO	Song	Sad	Normal	Kids	R1	A16	2	2	4	1	1	1	16	1	1	1	1	1	1	1	1	1	1
02-02-04-01-01-01-17.mp4	VO	Song	Sad	Normal	Kids	R1	A17	2	2	4	1	1	1	17	1	1	1	1	1	0	1	1	1	1
02-02-04-01-01-01-19.mp4	VO	Song	Sad	Normal	Kids	R1	A19	2	2	4	1	1	1	19	1	0	0	1	0	0	1	1	1	1
02-02-04-01-01-01-20.mp4	VO	Song	Sad	Normal	Kids	R1	A20	2	2	4	1	1	1	20	0	1	0	0	1	1	1	1	0	1
02-02-04-01-01-01-21.mp4	VO	Song	Sad	Normal	Kids	R1	A21	2	2	4	1	1	1	21	0	1	1	0	1	1	1	1	1	1
02-02-04-01-01-01-22.mp4	VO	Song	Sad	Normal	Kids	R1	A22	2	2	4	1	1	1	22	1	1	1	1	1	0	1	1	1	1
02-02-04-01-01-01-23.mp4	VO	Song	Sad	Normal	Kids	R1	A23	2	2	4	1	1	1	23	0	0	0	0	0	0	0	1	0	0
02-02-04-01-01-01-24.mp4	VO	Song	Sad	Normal	Kids	R1	A24	2	2	4	1	1	1	24	1	1	1	0	1	1	1	1	1	1
02-02-04-01-01-02-01.mp4	VO	Song	Sad	Normal	Kids	R2	A1	2	2	4	1	1	2	1	1	1	0	1	1	1	1	1	1	1
02-02-04-01-01-02-02.mp4	VO	Song	Sad	Normal	Kids	R2	A2	2	2	4	1	1	2	2	1	1	1	1	1	1	1	1	0	0
02-02-04-01-01-02-03.mp4	VO	Song	Sad	Normal	Kids	R2	A3	2	2	4	1	1	2	3	1	1	1	1	1	1	1	1	1	1
02-02-04-01-01-02-04.mp4	VO	Song	Sad	Normal	Kids	R2	A4	2	2	4	1	1	2	4	1	1	1	1	1	1	1	0	1	1
02-02-04-01-01-02-05.mp4	VO	Song	Sad	Normal	Kids	R2	A5	2	2	4	1	1	2	5	1	1	0	1	1	0	1	0	1	0
02-02-04-01-01-02-06.mp4	VO	Song	Sad	Normal	Kids	R2	A6	2	2	4	1	1	2	6	1	1	1	1	1	1	1	1	1	1
02-02-04-01-01-02-07.mp4	VO	Song	Sad	Normal	Kids	R2	A7	2	2	4	1	1	2	7	1	1	1	0	1	1	1	1	1	1
02-02-04-01-01-02-08.mp4	VO	Song	Sad	Normal	Kids	R2	A8	2	2	4	1	1	2	8	1	1	1	1	1	1	0	1	1	1
02-02-04-01-01-02-09.mp4	VO	Song	Sad	Normal	Kids	R2	A9	2	2	4	1	1	2	9	1	1	1	1	1	1	1	1	1	0
02-02-04-01-01-02-10.mp4	VO	Song	Sad	Normal	Kids	R2	A10	2	2	4	1	1	2	10	1	1	1	1	0	1	1	1	1	1
02-02-04-01-01-02-11.mp4	VO	Song	Sad	Normal	Kids	R2	A11	2	2	4	1	1	2	11	0	1	0	0	0	1	0	0	1	0
02-02-04-01-01-02-12.mp4	VO	Song	Sad	Normal	Kids	R2	A12	2	2	4	1	1	2	12	1	1	1	1	1	1	1	1	1	1
02-02-04-01-01-02-13.mp4	VO	Song	Sad	Normal	Kids	R2	A13	2	2	4	1	1	2	13	0	0	0	0	1	0	1	0	1	0
02-02-04-01-01-02-14.mp4	VO	Song	Sad	Normal	Kids	R2	A14	2	2	4	1	1	2	14	1	0	1	1	1	1	0	1	1	0
02-02-04-01-01-02-15.mp4	VO	Song	Sad	Normal	Kids	R2	A15	2	2	4	1	1	2	15	1	0	0	0	0	1	0	0	0	0
02-02-04-01-01-02-16.mp4	VO	Song	Sad	Normal	Kids	R2	A16	2	2	4	1	1	2	16	0	0	0	0	0	1	0	0	0	0
02-02-04-01-01-02-17.mp4	VO	Song	Sad	Normal	Kids	R2	A17	2	2	4	1	1	2	17	1	1	1	1	1	0	0	1	1	1
02-02-04-01-01-02-19.mp4	VO	Song	Sad	Normal	Kids	R2	A19	2	2	4	1	1	2	19	1	1	1	0	1	1	1	1	1	1
02-02-04-01-01-02-20.mp4	VO	Song	Sad	Normal	Kids	R2	A20	2	2	4	1	1	2	20	1	1	1	1	1	1	1	0	0	1
02-02-04-01-01-02-21.mp4	VO	Song	Sad	Normal	Kids	R2	A21	2	2	4	1	1	2	21	1	1	0	1	1	1	1	1	0	1
02-02-04-01-01-02-22.mp4	VO	Song	Sad	Normal	Kids	R2	A22	2	2	4	1	1	2	22	0	1	0	0	1	1	0	1	1	1
02-02-04-01-01-02-23.mp4	VO	Song	Sad	Normal	Kids	R2	A23	2	2	4	1	1	2	23	0	0	0	0	0	0	0	0	0	0
02-02-04-01-01-02-24.mp4	VO	Song	Sad	Normal	Kids	R2	A24	2	2	4	1	1	2	24	1	0	1	1	1	1	1	1	1	1
02-02-04-01-02-01-01.mp4	VO	Song	Sad	Normal	Dogs	R1	A1	2	2	4	1	2	1	1	1	1	1	1	1	1	1	1	1	1
02-02-04-01-02-01-02.mp4	VO	Song	Sad	Normal	Dogs	R1	A2	2	2	4	1	2	1	2	1	1	0	0	1	1	0	0	1	0
02-02-04-01-02-01-03.mp4	VO	Song	Sad	Normal	Dogs	R1	A3	2	2	4	1	2	1	3	1	1	1	1	1	1	1	1	1	1
02-02-04-01-02-01-04.mp4	VO	Song	Sad	Normal	Dogs	R1	A4	2	2	4	1	2	1	4	1	1	1	1	1	1	1	1	1	1
02-02-04-01-02-01-05.mp4	VO	Song	Sad	Normal	Dogs	R1	A5	2	2	4	1	2	1	5	1	1	1	0	1	0	1	1	0	1
02-02-04-01-02-01-06.mp4	VO	Song	Sad	Normal	Dogs	R1	A6	2	2	4	1	2	1	6	1	1	1	1	1	1	0	1	1	1
02-02-04-01-02-01-07.mp4	VO	Song	Sad	Normal	Dogs	R1	A7	2	2	4	1	2	1	7	1	1	1	1	1	1	1	0	1	1
02-02-04-01-02-01-08.mp4	VO	Song	Sad	Normal	Dogs	R1	A8	2	2	4	1	2	1	8	1	1	1	0	1	1	0	1	1	1
02-02-04-01-02-01-09.mp4	VO	Song	Sad	Normal	Dogs	R1	A9	2	2	4	1	2	1	9	1	1	1	1	1	1	0	1	0	1
02-02-04-01-02-01-10.mp4	VO	Song	Sad	Normal	Dogs	R1	A10	2	2	4	1	2	1	10	1	1	1	0	1	1	1	1	1	1
02-02-04-01-02-01-11.mp4	VO	Song	Sad	Normal	Dogs	R1	A11	2	2	4	1	2	1	11	1	0	1	0	0	1	1	1	1	1
02-02-04-01-02-01-12.mp4	VO	Song	Sad	Normal	Dogs	R1	A12	2	2	4	1	2	1	12	1	1	1	1	0	0	1	1	1	1
02-02-04-01-02-01-13.mp4	VO	Song	Sad	Normal	Dogs	R1	A13	2	2	4	1	2	1	13	1	1	1	1	0	1	1	1	1	0
02-02-04-01-02-01-14.mp4	VO	Song	Sad	Normal	Dogs	R1	A14	2	2	4	1	2	1	14	1	1	1	1	1	1	0	1	0	1
02-02-04-01-02-01-15.mp4	VO	Song	Sad	Normal	Dogs	R1	A15	2	2	4	1	2	1	15	1	1	1	1	1	1	1	1	0	0
02-02-04-01-02-01-16.mp4	VO	Song	Sad	Normal	Dogs	R1	A16	2	2	4	1	2	1	16	1	1	0	1	1	0	1	0	1	0
02-02-04-01-02-01-17.mp4	VO	Song	Sad	Normal	Dogs	R1	A17	2	2	4	1	2	1	17	1	1	1	1	1	1	1	1	1	1
02-02-04-01-02-01-19.mp4	VO	Song	Sad	Normal	Dogs	R1	A19	2	2	4	1	2	1	19	1	1	1	1	0	1	1	0	1	1
02-02-04-01-02-01-20.mp4	VO	Song	Sad	Normal	Dogs	R1	A20	2	2	4	1	2	1	20	1	0	1	0	1	1	0	1	0	1
02-02-04-01-02-01-21.mp4	VO	Song	Sad	Normal	Dogs	R1	A21	2	2	4	1	2	1	21	1	0	1	1	0	1	1	0	1	0
02-02-04-01-02-01-22.mp4	VO	Song	Sad	Normal	Dogs	R1	A22	2	2	4	1	2	1	22	1	1	1	0	1	1	1	1	1	0
02-02-04-01-02-01-23.mp4	VO	Song	Sad	Normal	Dogs	R1	A23	2	2	4	1	2	1	23	0	1	0	0	0	0	0	1	0	0
02-02-04-01-02-01-24.mp4	VO	Song	Sad	Normal	Dogs	R1	A24	2	2	4	1	2	1	24	1	1	1	0	1	1	1	1	1	1
02-02-04-01-02-02-01.mp4	VO	Song	Sad	Normal	Dogs	R2	A1	2	2	4	1	2	2	1	1	1	1	1	1	1	1	1	1	1
02-02-04-01-02-02-02.mp4	VO	Song	Sad	Normal	Dogs	R2	A2	2	2	4	1	2	2	2	1	1	1	1	1	1	1	1	1	1
02-02-04-01-02-02-03.mp4	VO	Song	Sad	Normal	Dogs	R2	A3	2	2	4	1	2	2	3	1	1	1	1	1	1	1	1	1	1
02-02-04-01-02-02-04.mp4	VO	Song	Sad	Normal	Dogs	R2	A4	2	2	4	1	2	2	4	1	1	1	1	1	1	1	0	1	0
02-02-04-01-02-02-05.mp4	VO	Song	Sad	Normal	Dogs	R2	A5	2	2	4	1	2	2	5	1	1	1	1	1	1	1	1	0	1
02-02-04-01-02-02-06.mp4	VO	Song	Sad	Normal	Dogs	R2	A6	2	2	4	1	2	2	6	1	1	1	1	1	1	0	0	1	1
02-02-04-01-02-02-07.mp4	VO	Song	Sad	Normal	Dogs	R2	A7	2	2	4	1	2	2	7	1	1	1	1	1	1	1	1	1	1
02-02-04-01-02-02-08.mp4	VO	Song	Sad	Normal	Dogs	R2	A8	2	2	4	1	2	2	8	1	1	1	1	1	1	1	1	1	0
02-02-04-01-02-02-09.mp4	VO	Song	Sad	Normal	Dogs	R2	A9	2	2	4	1	2	2	9	0	0	1	1	1	1	1	1	1	1
02-02-04-01-02-02-10.mp4	VO	Song	Sad	Normal	Dogs	R2	A10	2	2	4	1	2	2	10	0	1	1	1	1	1	1	1	1	1
02-02-04-01-02-02-11.mp4	VO	Song	Sad	Normal	Dogs	R2	A11	2	2	4	1	2	2	11	0	1	1	1	1	1	1	1	1	0
02-02-04-01-02-02-12.mp4	VO	Song	Sad	Normal	Dogs	R2	A12	2	2	4	1	2	2	12	0	1	1	1	1	1	1	0	1	1
02-02-04-01-02-02-13.mp4	VO	Song	Sad	Normal	Dogs	R2	A13	2	2	4	1	2	2	13	0	1	1	0	0	0	1	0	1	1
02-02-04-01-02-02-14.mp4	VO	Song	Sad	Normal	Dogs	R2	A14	2	2	4	1	2	2	14	1	1	1	1	1	1	1	0	0	1
02-02-04-01-02-02-15.mp4	VO	Song	Sad	Normal	Dogs	R2	A15	2	2	4	1	2	2	15	0	1	1	1	1	0	1	1	1	1
02-02-04-01-02-02-16.mp4	VO	Song	Sad	Normal	Dogs	R2	A16	2	2	4	1	2	2	16	1	1	1	1	1	1	1	1	1	0
02-02-04-01-02-02-17.mp4	VO	Song	Sad	Normal	Dogs	R2	A17	2	2	4	1	2	2	17	1	1	1	0	1	1	1	1	1	1
02-02-04-01-02-02-19.mp4	VO	Song	Sad	Normal	Dogs	R2	A19	2	2	4	1	2	2	19	1	1	1	1	1	1	1	1	1	1
02-02-04-01-02-02-20.mp4	VO	Song	Sad	Normal	Dogs	R2	A20	2	2	4	1	2	2	20	0	0	0	0	0	0	0	0	0	0
02-02-04-01-02-02-21.mp4	VO	Song	Sad	Normal	Dogs	R2	A21	2	2	4	1	2	2	21	1	1	0	1	1	0	0	1	1	1
02-02-04-01-02-02-22.mp4	VO	Song	Sad	Normal	Dogs	R2	A22	2	2	4	1	2	2	22	0	0	1	1	0	0	1	1	0	1
02-02-04-01-02-02-23.mp4	VO	Song	Sad	Normal	Dogs	R2	A23	2	2	4	1	2	2	23	0	0	0	0	0	0	0	0	0	0
02-02-04-01-02-02-24.mp4	VO	Song	Sad	Normal	Dogs	R2	A24	2	2	4	1	2	2	24	1	1	0	1	1	1	0	0	1	1
02-02-04-02-01-01-01.mp4	VO	Song	Sad	Strong	Kids	R1	A1	2	2	4	2	1	1	1	1	0	1	1	1	1	1	1	1	1
02-02-04-02-01-01-02.mp4	VO	Song	Sad	Strong	Kids	R1	A2	2	2	4	2	1	1	2	1	1	0	1	1	1	1	1	1	1
02-02-04-02-01-01-03.mp4	VO	Song	Sad	Strong	Kids	R1	A3	2	2	4	2	1	1	3	1	1	1	1	1	1	1	1	1	1
02-02-04-02-01-01-04.mp4	VO	Song	Sad	Strong	Kids	R1	A4	2	2	4	2	1	1	4	1	1	0	1	0	1	1	0	1	0
02-02-04-02-01-01-05.mp4	VO	Song	Sad	Strong	Kids	R1	A5	2	2	4	2	1	1	5	1	1	1	1	1	1	1	1	1	1
02-02-04-02-01-01-06.mp4	VO	Song	Sad	Strong	Kids	R1	A6	2	2	4	2	1	1	6	1	1	1	1	1	0	1	1	0	1
02-02-04-02-01-01-07.mp4	VO	Song	Sad	Strong	Kids	R1	A7	2	2	4	2	1	1	7	1	1	1	1	1	1	1	1	1	1
02-02-04-02-01-01-08.mp4	VO	Song	Sad	Strong	Kids	R1	A8	2	2	4	2	1	1	8	1	1	1	1	1	1	1	1	1	1
02-02-04-02-01-01-09.mp4	VO	Song	Sad	Strong	Kids	R1	A9	2	2	4	2	1	1	9	1	1	1	1	1	1	1	1	1	1
02-02-04-02-01-01-10.mp4	VO	Song	Sad	Strong	Kids	R1	A10	2	2	4	2	1	1	10	1	1	1	1	1	1	1	1	1	1
02-02-04-02-01-01-11.mp4	VO	Song	Sad	Strong	Kids	R1	A11	2	2	4	2	1	1	11	1	1	1	1	0	1	1	1	1	1
02-02-04-02-01-01-12.mp4	VO	Song	Sad	Strong	Kids	R1	A12	2	2	4	2	1	1	12	1	0	1	0	1	0	0	0	1	0
02-02-04-02-01-01-13.mp4	VO	Song	Sad	Strong	Kids	R1	A13	2	2	4	2	1	1	13	0	0	0	1	0	0	1	1	1	1
02-02-04-02-01-01-14.mp4	VO	Song	Sad	Strong	Kids	R1	A14	2	2	4	2	1	1	14	0	1	1	1	1	1	1	1	1	1
02-02-04-02-01-01-15.mp4	VO	Song	Sad	Strong	Kids	R1	A15	2	2	4	2	1	1	15	1	1	0	1	1	1	1	0	1	0
02-02-04-02-01-01-16.mp4	VO	Song	Sad	Strong	Kids	R1	A16	2	2	4	2	1	1	16	1	1	1	1	0	1	1	1	1	1
02-02-04-02-01-01-17.mp4	VO	Song	Sad	Strong	Kids	R1	A17	2	2	4	2	1	1	17	1	1	1	0	1	1	1	1	1	1
02-02-04-02-01-01-19.mp4	VO	Song	Sad	Strong	Kids	R1	A19	2	2	4	2	1	1	19	1	1	1	1	1	1	1	1	1	1
02-02-04-02-01-01-20.mp4	VO	Song	Sad	Strong	Kids	R1	A20	2	2	4	2	1	1	20	1	1	1	0	1	1	1	1	1	1
02-02-04-02-01-01-21.mp4	VO	Song	Sad	Strong	Kids	R1	A21	2	2	4	2	1	1	21	1	1	1	0	1	0	0	1	1	1
02-02-04-02-01-01-22.mp4	VO	Song	Sad	Strong	Kids	R1	A22	2	2	4	2	1	1	22	1	1	1	1	1	1	1	1	1	0
02-02-04-02-01-01-23.mp4	VO	Song	Sad	Strong	Kids	R1	A23	2	2	4	2	1	1	23	1	1	0	1	0	1	1	1	1	0
02-02-04-02-01-01-24.mp4	VO	Song	Sad	Strong	Kids	R1	A24	2	2	4	2	1	1	24	1	1	1	1	1	1	1	1	1	0
02-02-04-02-01-02-01.mp4	VO	Song	Sad	Strong	Kids	R2	A1	2	2	4	2	1	2	1	1	1	1	1	1	1	1	1	1	1
02-02-04-02-01-02-02.mp4	VO	Song	Sad	Strong	Kids	R2	A2	2	2	4	2	1	2	2	1	1	1	1	1	1	1	1	1	1
02-02-04-02-01-02-03.mp4	VO	Song	Sad	Strong	Kids	R2	A3	2	2	4	2	1	2	3	1	1	1	1	1	1	1	1	1	1
02-02-04-02-01-02-04.mp4	VO	Song	Sad	Strong	Kids	R2	A4	2	2	4	2	1	2	4	1	1	0	1	1	1	1	1	1	1
02-02-04-02-01-02-05.mp4	VO	Song	Sad	Strong	Kids	R2	A5	2	2	4	2	1	2	5	1	1	1	1	1	1	1	1	1	1
02-02-04-02-01-02-06.mp4	VO	Song	Sad	Strong	Kids	R2	A6	2	2	4	2	1	2	6	1	1	0	1	1	1	1	1	1	1
02-02-04-02-01-02-07.mp4	VO	Song	Sad	Strong	Kids	R2	A7	2	2	4	2	1	2	7	1	1	1	1	1	1	1	1	1	1
02-02-04-02-01-02-08.mp4	VO	Song	Sad	Strong	Kids	R2	A8	2	2	4	2	1	2	8	1	1	1	1	1	1	1	1	1	1
02-02-04-02-01-02-09.mp4	VO	Song	Sad	Strong	Kids	R2	A9	2	2	4	2	1	2	9	1	1	1	1	1	1	1	1	1	1
02-02-04-02-01-02-10.mp4	VO	Song	Sad	Strong	Kids	R2	A10	2	2	4	2	1	2	10	1	1	1	1	0	1	1	1	1	1
02-02-04-02-01-02-11.mp4	VO	Song	Sad	Strong	Kids	R2	A11	2	2	4	2	1	2	11	1	1	1	1	1	0	1	1	1	1
02-02-04-02-01-02-12.mp4	VO	Song	Sad	Strong	Kids	R2	A12	2	2	4	2	1	2	12	0	1	1	1	1	0	1	1	1	1
02-02-04-02-01-02-13.mp4	VO	Song	Sad	Strong	Kids	R2	A13	2	2	4	2	1	2	13	1	0	0	1	0	1	1	1	1	1
02-02-04-02-01-02-14.mp4	VO	Song	Sad	Strong	Kids	R2	A14	2	2	4	2	1	2	14	1	1	0	1	1	1	1	1	1	1
02-02-04-02-01-02-15.mp4	VO	Song	Sad	Strong	Kids	R2	A15	2	2	4	2	1	2	15	0	1	1	1	0	1	1	0	1	0
02-02-04-02-01-02-16.mp4	VO	Song	Sad	Strong	Kids	R2	A16	2	2	4	2	1	2	16	1	1	1	1	1	1	1	0	1	1
02-02-04-02-01-02-17.mp4	VO	Song	Sad	Strong	Kids	R2	A17	2	2	4	2	1	2	17	1	1	1	0	1	1	1	1	0	0
02-02-04-02-01-02-19.mp4	VO	Song	Sad	Strong	Kids	R2	A19	2	2	4	2	1	2	19	1	1	1	1	0	1	1	1	1	1
02-02-04-02-01-02-20.mp4	VO	Song	Sad	Strong	Kids	R2	A20	2	2	4	2	1	2	20	0	1	1	1	1	1	1	1	0	0
02-02-04-02-01-02-21.mp4	VO	Song	Sad	Strong	Kids	R2	A21	2	2	4	2	1	2	21	1	0	1	1	1	1	0	1	0	0
02-02-04-02-01-02-22.mp4	VO	Song	Sad	Strong	Kids	R2	A22	2	2	4	2	1	2	22	1	1	0	0	0	1	1	1	1	1
02-02-04-02-01-02-23.mp4	VO	Song	Sad	Strong	Kids	R2	A23	2	2	4	2	1	2	23	0	1	0	0	1	0	0	0	0	1
02-02-04-02-01-02-24.mp4	VO	Song	Sad	Strong	Kids	R2	A24	2	2	4	2	1	2	24	1	1	1	1	1	1	1	1	1	1
02-02-04-02-02-01-01.mp4	VO	Song	Sad	Strong	Dogs	R1	A1	2	2	4	2	2	1	1	1	1	1	1	1	0	1	1	1	1
02-02-04-02-02-01-02.mp4	VO	Song	Sad	Strong	Dogs	R1	A2	2	2	4	2	2	1	2	1	1	1	1	1	1	1	1	1	1
02-02-04-02-02-01-03.mp4	VO	Song	Sad	Strong	Dogs	R1	A3	2	2	4	2	2	1	3	1	1	1	1	1	1	1	1	1	1
02-02-04-02-02-01-04.mp4	VO	Song	Sad	Strong	Dogs	R1	A4	2	2	4	2	2	1	4	1	1	1	1	1	1	0	1	1	1
02-02-04-02-02-01-05.mp4	VO	Song	Sad	Strong	Dogs	R1	A5	2	2	4	2	2	1	5	1	1	1	1	1	1	1	1	1	1
02-02-04-02-02-01-06.mp4	VO	Song	Sad	Strong	Dogs	R1	A6	2	2	4	2	2	1	6	1	1	1	1	1	1	1	1	1	1
02-02-04-02-02-01-07.mp4	VO	Song	Sad	Strong	Dogs	R1	A7	2	2	4	2	2	1	7	1	1	1	1	1	1	1	1	1	1
02-02-04-02-02-01-08.mp4	VO	Song	Sad	Strong	Dogs	R1	A8	2	2	4	2	2	1	8	1	1	1	1	1	0	1	1	1	1
02-02-04-02-02-01-09.mp4	VO	Song	Sad	Strong	Dogs	R1	A9	2	2	4	2	2	1	9	1	1	1	1	1	1	1	1	1	1
02-02-04-02-02-01-10.mp4	VO	Song	Sad	Strong	Dogs	R1	A10	2	2	4	2	2	1	10	1	1	1	1	1	1	1	0	1	1
02-02-04-02-02-01-11.mp4	VO	Song	Sad	Strong	Dogs	R1	A11	2	2	4	2	2	1	11	1	0	1	1	1	1	1	0	1	1
02-02-04-02-02-01-12.mp4	VO	Song	Sad	Strong	Dogs	R1	A12	2	2	4	2	2	1	12	0	1	1	1	0	0	1	1	0	1
02-02-04-02-02-01-13.mp4	VO	Song	Sad	Strong	Dogs	R1	A13	2	2	4	2	2	1	13	1	0	1	1	0	0	1	0	0	0
02-02-04-02-02-01-14.mp4	VO	Song	Sad	Strong	Dogs	R1	A14	2	2	4	2	2	1	14	0	0	1	1	1	1	0	0	1	0
02-02-04-02-02-01-15.mp4	VO	Song	Sad	Strong	Dogs	R1	A15	2	2	4	2	2	1	15	1	1	1	0	0	1	1	1	1	0
02-02-04-02-02-01-16.mp4	VO	Song	Sad	Strong	Dogs	R1	A16	2	2	4	2	2	1	16	1	1	1	1	1	1	0	1	0	1
02-02-04-02-02-01-17.mp4	VO	Song	Sad	Strong	Dogs	R1	A17	2	2	4	2	2	1	17	1	1	1	1	1	1	1	1	0	1
02-02-04-02-02-01-19.mp4	VO	Song	Sad	Strong	Dogs	R1	A19	2	2	4	2	2	1	19	0	1	1	1	1	1	1	1	0	1
02-02-04-02-02-01-20.mp4	VO	Song	Sad	Strong	Dogs	R1	A20	2	2	4	2	2	1	20	0	1	0	0	0	1	0	1	1	1
02-02-04-02-02-01-21.mp4	VO	Song	Sad	Strong	Dogs	R1	A21	2	2	4	2	2	1	21	0	1	1	0	1	0	1	1	1	0
02-02-04-02-02-01-22.mp4	VO	Song	Sad	Strong	Dogs	R1	A22	2	2	4	2	2	1	22	1	1	0	1	0	1	1	0	0	1
02-02-04-02-02-01-23.mp4	VO	Song	Sad	Strong	Dogs	R1	A23	2	2	4	2	2	1	23	1	1	1	0	1	0	0	0	1	1
02-02-04-02-02-01-24.mp4	VO	Song	Sad	Strong	Dogs	R1	A24	2	2	4	2	2	1	24	1	1	1	1	1	1	1	1	1	1
02-02-04-02-02-02-01.mp4	VO	Song	Sad	Strong	Dogs	R2	A1	2	2	4	2	2	2	1	1	1	1	1	1	1	1	1	1	1
02-02-04-02-02-02-02.mp4	VO	Song	Sad	Strong	Dogs	R2	A2	2	2	4	2	2	2	2	1	1	1	1	1	1	1	1	1	1
02-02-04-02-02-02-03.mp4	VO	Song	Sad	Strong	Dogs	R2	A3	2	2	4	2	2	2	3	1	1	1	1	1	1	1	1	1	1
02-02-04-02-02-02-04.mp4	VO	Song	Sad	Strong	Dogs	R2	A4	2	2	4	2	2	2	4	1	1	1	1	0	1	1	1	1	1
02-02-04-02-02-02-05.mp4	VO	Song	Sad	Strong	Dogs	R2	A5	2	2	4	2	2	2	5	1	1	1	1	1	1	1	1	1	1
02-02-04-02-02-02-06.mp4	VO	Song	Sad	Strong	Dogs	R2	A6	2	2	4	2	2	2	6	1	1	1	1	1	1	1	0	1	1
02-02-04-02-02-02-07.mp4	VO	Song	Sad	Strong	Dogs	R2	A7	2	2	4	2	2	2	7	1	1	1	1	1	0	1	1	1	1
02-02-04-02-02-02-08.mp4	VO	Song	Sad	Strong	Dogs	R2	A8	2	2	4	2	2	2	8	0	1	1	1	1	1	0	1	1	1
02-02-04-02-02-02-09.mp4	VO	Song	Sad	Strong	Dogs	R2	A9	2	2	4	2	2	2	9	1	1	1	1	1	1	1	1	1	1
02-02-04-02-02-02-10.mp4	VO	Song	Sad	Strong	Dogs	R2	A10	2	2	4	2	2	2	10	1	1	1	1	1	1	1	1	1	1
02-02-04-02-02-02-11.mp4	VO	Song	Sad	Strong	Dogs	R2	A11	2	2	4	2	2	2	11	0	1	0	1	1	1	1	1	1	1
02-02-04-02-02-02-12.mp4	VO	Song	Sad	Strong	Dogs	R2	A12	2	2	4	2	2	2	12	0	0	1	1	1	1	0	1	1	1
02-02-04-02-02-02-13.mp4	VO	Song	Sad	Strong	Dogs	R2	A13	2	2	4	2	2	2	13	0	1	0	0	0	1	0	0	1	0
02-02-04-02-02-02-14.mp4	VO	Song	Sad	Strong	Dogs	R2	A14	2	2	4	2	2	2	14	0	1	1	0	0	0	0	1	0	1
02-02-04-02-02-02-15.mp4	VO	Song	Sad	Strong	Dogs	R2	A15	2	2	4	2	2	2	15	1	1	1	0	1	0	1	1	1	1
02-02-04-02-02-02-16.mp4	VO	Song	Sad	Strong	Dogs	R2	A16	2	2	4	2	2	2	16	1	1	1	1	1	1	1	1	1	1
02-02-04-02-02-02-17.mp4	VO	Song	Sad	Strong	Dogs	R2	A17	2	2	4	2	2	2	17	1	1	1	1	0	1	1	1	1	1
02-02-04-02-02-02-19.mp4	VO	Song	Sad	Strong	Dogs	R2	A19	2	2	4	2	2	2	19	1	1	1	1	1	1	1	1	1	1
02-02-04-02-02-02-20.mp4	VO	Song	Sad	Strong	Dogs	R2	A20	2	2	4	2	2	2	20	0	0	1	1	0	1	0	0	1	1
02-02-04-02-02-02-21.mp4	VO	Song	Sad	Strong	Dogs	R2	A21	2	2	4	2	2	2	21	1	1	1	1	1	1	0	1	1	0
02-02-04-02-02-02-22.mp4	VO	Song	Sad	Strong	Dogs	R2	A22	2	2	4	2	2	2	22	1	1	1	1	1	1	1	1	1	1
02-02-04-02-02-02-23.mp4	VO	Song	Sad	Strong	Dogs	R2	A23	2	2	4	2	2	2	23	1	0	1	1	0	1	1	1	1	0
02-02-04-02-02-02-24.mp4	VO	Song	Sad	Strong	Dogs	R2	A24	2	2	4	2	2	2	24	0	1	1	1	0	1	1	1	1	1
02-02-05-01-01-01-01.mp4	VO	Song	Angry	Normal	Kids	R1	A1	2	2	5	1	1	1	1	1	0	1	1	1	1	1	1	0	1
02-02-05-01-01-01-02.mp4	VO	Song	Angry	Normal	Kids	R1	A2	2	2	5	1	1	1	2	1	1	1	1	1	1	1	1	1	0
02-02-05-01-01-01-03.mp4	VO	Song	Angry	Normal	Kids	R1	A3	2	2	5	1	1	1	3	1	1	1	1	1	1	1	1	1	1
02-02-05-01-01-01-04.mp4	VO	Song	Angry	Normal	Kids	R1	A4	2	2	5	1	1	1	4	1	1	1	1	1	1	1	1	1	1
02-02-05-01-01-01-05.mp4	VO	Song	Angry	Normal	Kids	R1	A5	2	2	5	1	1	1	5	0	0	0	0	0	1	0	0	1	0
02-02-05-01-01-01-06.mp4	VO	Song	Angry	Normal	Kids	R1	A6	2	2	5	1	1	1	6	1	1	1	1	1	1	1	1	1	1
02-02-05-01-01-01-07.mp4	VO	Song	Angry	Normal	Kids	R1	A7	2	2	5	1	1	1	7	1	1	1	1	1	1	1	1	1	1
02-02-05-01-01-01-08.mp4	VO	Song	Angry	Normal	Kids	R1	A8	2	2	5	1	1	1	8	1	1	1	1	0	1	1	1	1	1
02-02-05-01-01-01-09.mp4	VO	Song	Angry	Normal	Kids	R1	A9	2	2	5	1	1	1	9	1	1	1	1	1	1	1	1	1	1
02-02-05-01-01-01-10.mp4	VO	Song	Angry	Normal	Kids	R1	A10	2	2	5	1	1	1	10	1	1	0	0	1	1	1	1	0	0
02-02-05-01-01-01-11.mp4	VO	Song	Angry	Normal	Kids	R1	A11	2	2	5	1	1	1	11	1	1	0	1	1	1	0	1	1	0
02-02-05-01-01-01-12.mp4	VO	Song	Angry	Normal	Kids	R1	A12	2	2	5	1	1	1	12	1	1	1	1	1	1	1	1	1	1
02-02-05-01-01-01-13.mp4	VO	Song	Angry	Normal	Kids	R1	A13	2	2	5	1	1	1	13	1	1	1	1	1	1	1	1	1	1
02-02-05-01-01-01-14.mp4	VO	Song	Angry	Normal	Kids	R1	A14	2	2	5	1	1	1	14	1	0	1	1	1	1	1	1	1	1
02-02-05-01-01-01-15.mp4	VO	Song	Angry	Normal	Kids	R1	A15	2	2	5	1	1	1	15	1	0	1	0	0	0	1	1	1	1
02-02-05-01-01-01-16.mp4	VO	Song	Angry	Normal	Kids	R1	A16	2	2	5	1	1	1	16	1	1	1	1	1	1	1	1	1	1
02-02-05-01-01-01-17.mp4	VO	Song	Angry	Normal	Kids	R1	A17	2	2	5	1	1	1	17	1	1	1	1	1	1	1	1	1	1
02-02-05-01-01-01-19.mp4	VO	Song	Angry	Normal	Kids	R1	A19	2	2	5	1	1	1	19	1	1	1	1	1	1	1	1	1	1
02-02-05-01-01-01-20.mp4	VO	Song	Angry	Normal	Kids	R1	A20	2	2	5	1	1	1	20	1	1	1	1	1	0	0	1	1	1
02-02-05-01-01-01-21.mp4	VO	Song	Angry	Normal	Kids	R1	A21	2	2	5	1	1	1	21	1	1	1	0	0	1	1	0	1	1
02-02-05-01-01-01-22.mp4	VO	Song	Angry	Normal	Kids	R1	A22	2	2	5	1	1	1	22	1	1	1	1	0	1	1	1	0	1
02-02-05-01-01-01-23.mp4	VO	Song	Angry	Normal	Kids	R1	A23	2	2	5	1	1	1	23	1	1	1	1	1	1	1	1	1	1
02-02-05-01-01-01-24.mp4	VO	Song	Angry	Normal	Kids	R1	A24	2	2	5	1	1	1	24	0	1	1	1	1	1	1	1	1	1
02-02-05-01-01-02-01.mp4	VO	Song	Angry	Normal	Kids	R2	A1	2	2	5	1	1	2	1	1	1	1	1	1	1	1	1	1	1
02-02-05-01-01-02-02.mp4	VO	Song	Angry	Normal	Kids	R2	A2	2	2	5	1	1	2	2	1	1	1	1	1	0	1	0	0	0
02-02-05-01-01-02-03.mp4	VO	Song	Angry	Normal	Kids	R2	A3	2	2	5	1	1	2	3	1	1	1	1	0	1	1	1	0	1
02-02-05-01-01-02-04.mp4	VO	Song	Angry	Normal	Kids	R2	A4	2	2	5	1	1	2	4	1	1	1	1	1	1	1	1	1	1
02-02-05-01-01-02-05.mp4	VO	Song	Angry	Normal	Kids	R2	A5	2	2	5	1	1	2	5	0	0	1	1	0	1	1	1	1	1
02-02-05-01-01-02-06.mp4	VO	Song	Angry	Normal	Kids	R2	A6	2	2	5	1	1	2	6	1	1	1	0	1	1	1	1	0	1
02-02-05-01-01-02-07.mp4	VO	Song	Angry	Normal	Kids	R2	A7	2	2	5	1	1	2	7	1	1	1	1	1	1	1	1	1	1
02-02-05-01-01-02-08.mp4	VO	Song	Angry	Normal	Kids	R2	A8	2	2	5	1	1	2	8	1	1	1	1	1	1	1	1	1	0
02-02-05-01-01-02-09.mp4	VO	Song	Angry	Normal	Kids	R2	A9	2	2	5	1	1	2	9	1	1	1	1	0	1	1	0	1	1
02-02-05-01-01-02-10.mp4	VO	Song	Angry	Normal	Kids	R2	A10	2	2	5	1	1	2	10	1	1	1	1	1	1	1	1	1	1
02-02-05-01-01-02-11.mp4	VO	Song	Angry	Normal	Kids	R2	A11	2	2	5	1	1	2	11	1	1	1	1	1	1	1	1	0	0
02-02-05-01-01-02-12.mp4	VO	Song	Angry	Normal	Kids	R2	A12	2	2	5	1	1	2	12	1	1	1	1	1	1	1	1	1	1
02-02-05-01-01-02-13.mp4	VO	Song	Angry	Normal	Kids	R2	A13	2	2	5	1	1	2	13	1	1	1	1	1	1	1	1	0	1
02-02-05-01-01-02-14.mp4	VO	Song	Angry	Normal	Kids	R2	A14	2	2	5	1	1	2	14	1	1	1	1	1	1	1	1	1	1
02-02-05-01-01-02-15.mp4	VO	Song	Angry	Normal	Kids	R2	A15	2	2	5	1	1	2	15	1	1	1	1	1	0	1	1	1	1
02-02-05-01-01-02-16.mp4	VO	Song	Angry	Normal	Kids	R2	A16	2	2	5	1	1	2	16	1	1	1	1	1	1	1	1	1	1
02-02-05-01-01-02-17.mp4	VO	Song	Angry	Normal	Kids	R2	A17	2	2	5	1	1	2	17	1	1	1	1	1	1	1	1	1	1
02-02-05-01-01-02-19.mp4	VO	Song	Angry	Normal	Kids	R2	A19	2	2	5	1	1	2	19	1	0	1	1	1	1	1	1	1	1
02-02-05-01-01-02-20.mp4	VO	Song	Angry	Normal	Kids	R2	A20	2	2	5	1	1	2	20	1	0	1	1	0	1	1	1	1	1
02-02-05-01-01-02-21.mp4	VO	Song	Angry	Normal	Kids	R2	A21	2	2	5	1	1	2	21	1	1	0	1	1	1	1	1	1	1
02-02-05-01-01-02-22.mp4	VO	Song	Angry	Normal	Kids	R2	A22	2	2	5	1	1	2	22	1	1	1	1	1	1	0	1	0	1
02-02-05-01-01-02-23.mp4	VO	Song	Angry	Normal	Kids	R2	A23	2	2	5	1	1	2	23	1	1	1	1	1	1	1	1	1	1
02-02-05-01-01-02-24.mp4	VO	Song	Angry	Normal	Kids	R2	A24	2	2	5	1	1	2	24	1	1	1	1	1	1	1	1	0	1
02-02-05-01-02-01-01.mp4	VO	Song	Angry	Normal	Dogs	R1	A1	2	2	5	1	2	1	1	1	1	1	1	1	1	1	1	1	1
02-02-05-01-02-01-02.mp4	VO	Song	Angry	Normal	Dogs	R1	A2	2	2	5	1	2	1	2	1	0	1	1	1	1	0	1	1	1
02-02-05-01-02-01-03.mp4	VO	Song	Angry	Normal	Dogs	R1	A3	2	2	5	1	2	1	3	1	1	1	1	1	1	1	1	1	1
02-02-05-01-02-01-04.mp4	VO	Song	Angry	Normal	Dogs	R1	A4	2	2	5	1	2	1	4	1	1	1	1	1	1	1	1	1	1
02-02-05-01-02-01-05.mp4	VO	Song	Angry	Normal	Dogs	R1	A5	2	2	5	1	2	1	5	1	1	0	1	0	1	1	1	1	1
02-02-05-01-02-01-06.mp4	VO	Song	Angry	Normal	Dogs	R1	A6	2	2	5	1	2	1	6	1	1	1	0	1	1	1	1	1	1
02-02-05-01-02-01-07.mp4	VO	Song	Angry	Normal	Dogs	R1	A7	2	2	5	1	2	1	7	1	1	1	1	1	1	1	1	1	1
02-02-05-01-02-01-08.mp4	VO	Song	Angry	Normal	Dogs	R1	A8	2	2	5	1	2	1	8	1	1	1	1	1	1	1	1	1	1
02-02-05-01-02-01-09.mp4	VO	Song	Angry	Normal	Dogs	R1	A9	2	2	5	1	2	1	9	1	1	1	1	1	1	1	1	1	1
02-02-05-01-02-01-10.mp4	VO	Song	Angry	Normal	Dogs	R1	A10	2	2	5	1	2	1	10	1	1	1	1	1	0	1	1	1	1
02-02-05-01-02-01-11.mp4	VO	Song	Angry	Normal	Dogs	R1	A11	2	2	5	1	2	1	11	1	1	1	1	1	1	0	0	1	1
02-02-05-01-02-01-12.mp4	VO	Song	Angry	Normal	Dogs	R1	A12	2	2	5	1	2	1	12	0	1	1	1	1	1	1	1	1	0
02-02-05-01-02-01-13.mp4	VO	Song	Angry	Normal	Dogs	R1	A13	2	2	5	1	2	1	13	1	1	1	1	1	1	1	0	1	1
02-02-05-01-02-01-14.mp4	VO	Song	Angry	Normal	Dogs	R1	A14	2	2	5	1	2	1	14	1	1	1	1	1	1	1	1	1	1
02-02-05-01-02-01-15.mp4	VO	Song	Angry	Normal	Dogs	R1	A15	2	2	5	1	2	1	15	0	1	0	1	1	1	0	1	1	1
02-02-05-01-02-01-16.mp4	VO	Song	Angry	Normal	Dogs	R1	A16	2	2	5	1	2	1	16	1	1	1	1	1	1	1	1	1	1
02-02-05-01-02-01-17.mp4	VO	Song	Angry	Normal	Dogs	R1	A17	2	2	5	1	2	1	17	1	1	1	1	1	1	1	1	1	1
02-02-05-01-02-01-19.mp4	VO	Song	Angry	Normal	Dogs	R1	A19	2	2	5	1	2	1	19	1	1	1	1	1	1	1	1	0	1
02-02-05-01-02-01-20.mp4	VO	Song	Angry	Normal	Dogs	R1	A20	2	2	5	1	2	1	20	1	1	1	1	1	1	1	1	1	0
02-02-05-01-02-01-21.mp4	VO	Song	Angry	Normal	Dogs	R1	A21	2	2	5	1	2	1	21	1	1	0	1	0	0	1	0	0	0
02-02-05-01-02-01-22.mp4	VO	Song	Angry	Normal	Dogs	R1	A22	2	2	5	1	2	1	22	0	0	1	1	1	0	0	0	0	1
02-02-05-01-02-01-23.mp4	VO	Song	Angry	Normal	Dogs	R1	A23	2	2	5	1	2	1	23	1	1	1	0	1	1	1	1	1	1
02-02-05-01-02-01-24.mp4	VO	Song	Angry	Normal	Dogs	R1	A24	2	2	5	1	2	1	24	0	1	1	1	1	0	1	1	1	1
02-02-05-01-02-02-01.mp4	VO	Song	Angry	Normal	Dogs	R2	A1	2	2	5	1	2	2	1	1	0	1	1	1	1	1	1	1	1
02-02-05-01-02-02-02.mp4	VO	Song	Angry	Normal	Dogs	R2	A2	2	2	5	1	2	2	2	1	1	1	1	1	0	1	1	1	1
02-02-05-01-02-02-03.mp4	VO	Song	Angry	Normal	Dogs	R2	A3	2	2	5	1	2	2	3	1	1	1	1	1	1	1	1	0	1
02-02-05-01-02-02-04.mp4	VO	Song	Angry	Normal	Dogs	R2	A4	2	2	5	1	2	2	4	1	1	1	1	1	1	1	1	1	1
02-02-05-01-02-02-05.mp4	VO	Song	Angry	Normal	Dogs	R2	A5	2	2	5	1	2	2	5	1	1	0	1	1	1	0	1	0	0
02-02-05-01-02-02-06.mp4	VO	Song	Angry	Normal	Dogs	R2	A6	2	2	5	1	2	2	6	1	1	1	1	1	1	1	1	1	0
02-02-05-01-02-02-07.mp4	VO	Song	Angry	Normal	Dogs	R2	A7	2	2	5	1	2	2	7	1	1	1	1	1	1	1	1	1	1
02-02-05-01-02-02-08.mp4	VO	Song	Angry	Normal	Dogs	R2	A8	2	2	5	1	2	2	8	1	1	1	1	1	1	1	1	1	1
02-02-05-01-02-02-09.mp4	VO	Song	Angry	Normal	Dogs	R2	A9	2	2	5	1	2	2	9	1	1	1	1	1	1	1	1	1	1
02-02-05-01-02-02-10.mp4	VO	Song	Angry	Normal	Dogs	R2	A10	2	2	5	1	2	2	10	1	1	1	1	1	1	1	1	1	1
02-02-05-01-02-02-11.mp4	VO	Song	Angry	Normal	Dogs	R2	A11	2	2	5	1	2	2	11	1	1	1	1	1	1	0	1	1	1
02-02-05-01-02-02-12.mp4	VO	Song	Angry	Normal	Dogs	R2	A12	2	2	5	1	2	2	12	1	1	1	1	1	1	1	1	1	1
02-02-05-01-02-02-13.mp4	VO	Song	Angry	Normal	Dogs	R2	A13	2	2	5	1	2	2	13	1	1	1	1	1	1	1	1	1	1
02-02-05-01-02-02-14.mp4	VO	Song	Angry	Normal	Dogs	R2	A14	2	2	5	1	2	2	14	1	1	1	1	1	1	1	1	1	1
02-02-05-01-02-02-15.mp4	VO	Song	Angry	Normal	Dogs	R2	A15	2	2	5	1	2	2	15	1	0	1	1	1	1	1	1	1	1
02-02-05-01-02-02-16.mp4	VO	Song	Angry	Normal	Dogs	R2	A16	2	2	5	1	2	2	16	0	1	1	1	1	1	0	1	1	1
02-02-05-01-02-02-17.mp4	VO	Song	Angry	Normal	Dogs	R2	A17	2	2	5	1	2	2	17	1	1	1	1	1	1	1	1	1	1
02-02-05-01-02-02-19.mp4	VO	Song	Angry	Normal	Dogs	R2	A19	2	2	5	1	2	2	19	1	1	1	1	1	1	1	1	1	1
02-02-05-01-02-02-20.mp4	VO	Song	Angry	Normal	Dogs	R2	A20	2	2	5	1	2	2	20	1	1	1	1	1	1	1	1	1	1
02-02-05-01-02-02-21.mp4	VO	Song	Angry	Normal	Dogs	R2	A21	2	2	5	1	2	2	21	1	1	1	1	1	1	1	0	1	1
02-02-05-01-02-02-22.mp4	VO	Song	Angry	Normal	Dogs	R2	A22	2	2	5	1	2	2	22	1	1	1	0	0	0	1	1	0	1
02-02-05-01-02-02-23.mp4	VO	Song	Angry	Normal	Dogs	R2	A23	2	2	5	1	2	2	23	1	1	1	1	1	1	1	1	1	1
02-02-05-01-02-02-24.mp4	VO	Song	Angry	Normal	Dogs	R2	A24	2	2	5	1	2	2	24	1	1	1	1	1	1	0	1	0	1
02-02-05-02-01-01-01.mp4	VO	Song	Angry	Strong	Kids	R1	A1	2	2	5	2	1	1	1	1	1	1	1	1	1	1	1	1	1
02-02-05-02-01-01-02.mp4	VO	Song	Angry	Strong	Kids	R1	A2	2	2	5	2	1	1	2	1	1	1	1	1	1	0	1	1	1
02-02-05-02-01-01-03.mp4	VO	Song	Angry	Strong	Kids	R1	A3	2	2	5	2	1	1	3	1	1	1	1	1	0	1	0	1	1
02-02-05-02-01-01-04.mp4	VO	Song	Angry	Strong	Kids	R1	A4	2	2	5	2	1	1	4	1	1	1	1	1	1	1	1	1	1
02-02-05-02-01-01-05.mp4	VO	Song	Angry	Strong	Kids	R1	A5	2	2	5	2	1	1	5	0	0	1	0	0	0	0	1	0	1
02-02-05-02-01-01-06.mp4	VO	Song	Angry	Strong	Kids	R1	A6	2	2	5	2	1	1	6	1	1	1	1	1	1	1	1	1	1
02-02-05-02-01-01-07.mp4	VO	Song	Angry	Strong	Kids	R1	A7	2	2	5	2	1	1	7	1	1	1	1	1	1	1	1	1	1
02-02-05-02-01-01-08.mp4	VO	Song	Angry	Strong	Kids	R1	A8	2	2	5	2	1	1	8	1	1	1	1	1	1	1	1	1	1
02-02-05-02-01-01-09.mp4	VO	Song	Angry	Strong	Kids	R1	A9	2	2	5	2	1	1	9	1	1	1	1	1	1	1	1	1	1
02-02-05-02-01-01-10.mp4	VO	Song	Angry	Strong	Kids	R1	A10	2	2	5	2	1	1	10	1	1	1	1	1	1	1	1	1	1
02-02-05-02-01-01-11.mp4	VO	Song	Angry	Strong	Kids	R1	A11	2	2	5	2	1	1	11	1	1	1	1	1	1	1	1	1	1
02-02-05-02-01-01-12.mp4	VO	Song	Angry	Strong	Kids	R1	A12	2	2	5	2	1	1	12	1	1	1	1	1	1	1	1	1	1
02-02-05-02-01-01-13.mp4	VO	Song	Angry	Strong	Kids	R1	A13	2	2	5	2	1	1	13	1	1	1	1	0	1	1	1	1	1
02-02-05-02-01-01-14.mp4	VO	Song	Angry	Strong	Kids	R1	A14	2	2	5	2	1	1	14	1	1	1	1	1	1	1	1	1	1
02-02-05-02-01-01-15.mp4	VO	Song	Angry	Strong	Kids	R1	A15	2	2	5	2	1	1	15	1	1	0	1	1	0	1	1	0	0
02-02-05-02-01-01-16.mp4	VO	Song	Angry	Strong	Kids	R1	A16	2	2	5	2	1	1	16	1	1	1	1	1	1	1	1	1	1
02-02-05-02-01-01-17.mp4	VO	Song	Angry	Strong	Kids	R1	A17	2	2	5	2	1	1	17	1	1	1	1	1	1	1	1	1	1
02-02-05-02-01-01-19.mp4	VO	Song	Angry	Strong	Kids	R1	A19	2	2	5	2	1	1	19	1	1	1	1	1	1	1	1	0	1
02-02-05-02-01-01-20.mp4	VO	Song	Angry	Strong	Kids	R1	A20	2	2	5	2	1	1	20	1	1	1	0	0	1	1	0	1	1
02-02-05-02-01-01-21.mp4	VO	Song	Angry	Strong	Kids	R1	A21	2	2	5	2	1	1	21	0	1	1	1	1	1	0	1	1	1
02-02-05-02-01-01-22.mp4	VO	Song	Angry	Strong	Kids	R1	A22	2	2	5	2	1	1	22	1	1	1	1	1	1	1	1	1	1
02-02-05-02-01-01-23.mp4	VO	Song	Angry	Strong	Kids	R1	A23	2	2	5	2	1	1	23	1	1	1	1	1	1	1	1	1	0
02-02-05-02-01-01-24.mp4	VO	Song	Angry	Strong	Kids	R1	A24	2	2	5	2	1	1	24	1	1	1	1	1	1	1	1	1	1
02-02-05-02-01-02-01.mp4	VO	Song	Angry	Strong	Kids	R2	A1	2	2	5	2	1	2	1	1	1	1	1	1	1	1	1	1	1
02-02-05-02-01-02-02.mp4	VO	Song	Angry	Strong	Kids	R2	A2	2	2	5	2	1	2	2	1	1	1	1	1	1	1	1	1	1
02-02-05-02-01-02-03.mp4	VO	Song	Angry	Strong	Kids	R2	A3	2	2	5	2	1	2	3	1	1	1	1	1	1	1	1	1	1
02-02-05-02-01-02-04.mp4	VO	Song	Angry	Strong	Kids	R2	A4	2	2	5	2	1	2	4	1	1	1	1	1	1	1	1	1	1
02-02-05-02-01-02-05.mp4	VO	Song	Angry	Strong	Kids	R2	A5	2	2	5	2	1	2	5	1	1	1	1	1	1	1	1	1	1
02-02-05-02-01-02-06.mp4	VO	Song	Angry	Strong	Kids	R2	A6	2	2	5	2	1	2	6	0	1	1	1	1	1	1	1	1	1
02-02-05-02-01-02-07.mp4	VO	Song	Angry	Strong	Kids	R2	A7	2	2	5	2	1	2	7	1	1	1	0	1	1	1	1	0	1
02-02-05-02-01-02-08.mp4	VO	Song	Angry	Strong	Kids	R2	A8	2	2	5	2	1	2	8	1	1	1	1	0	1	1	1	1	1
02-02-05-02-01-02-09.mp4	VO	Song	Angry	Strong	Kids	R2	A9	2	2	5	2	1	2	9	1	1	0	1	1	1	1	0	1	1
02-02-05-02-01-02-10.mp4	VO	Song	Angry	Strong	Kids	R2	A10	2	2	5	2	1	2	10	1	1	1	1	1	1	1	1	1	1
02-02-05-02-01-02-11.mp4	VO	Song	Angry	Strong	Kids	R2	A11	2	2	5	2	1	2	11	1	0	1	0	1	0	0	1	1	1
02-02-05-02-01-02-12.mp4	VO	Song	Angry	Strong	Kids	R2	A12	2	2	5	2	1	2	12	1	1	1	1	1	0	1	1	1	1
02-02-05-02-01-02-13.mp4	VO	Song	Angry	Strong	Kids	R2	A13	2	2	5	2	1	2	13	1	1	1	1	1	1	1	1	1	0
02-02-05-02-01-02-14.mp4	VO	Song	Angry	Strong	Kids	R2	A14	2	2	5	2	1	2	14	1	1	1	1	1	1	1	1	1	1
02-02-05-02-01-02-15.mp4	VO	Song	Angry	Strong	Kids	R2	A15	2	2	5	2	1	2	15	1	0	0	1	0	1	0	1	0	1
02-02-05-02-01-02-16.mp4	VO	Song	Angry	Strong	Kids	R2	A16	2	2	5	2	1	2	16	1	0	1	1	1	1	1	1	1	1
02-02-05-02-01-02-17.mp4	VO	Song	Angry	Strong	Kids	R2	A17	2	2	5	2	1	2	17	1	1	1	1	1	0	1	1	1	1
02-02-05-02-01-02-19.mp4	VO	Song	Angry	Strong	Kids	R2	A19	2	2	5	2	1	2	19	1	1	1	0	1	1	1	1	1	1
02-02-05-02-01-02-20.mp4	VO	Song	Angry	Strong	Kids	R2	A20	2	2	5	2	1	2	20	1	1	1	0	1	1	1	1	1	1
02-02-05-02-01-02-21.mp4	VO	Song	Angry	Strong	Kids	R2	A21	2	2	5	2	1	2	21	1	1	1	1	1	1	1	1	1	0
02-02-05-02-01-02-22.mp4	VO	Song	Angry	Strong	Kids	R2	A22	2	2	5	2	1	2	22	0	1	0	1	0	1	1	0	1	1
02-02-05-02-01-02-23.mp4	VO	Song	Angry	Strong	Kids	R2	A23	2	2	5	2	1	2	23	1	1	1	0	1	1	1	1	1	1
02-02-05-02-01-02-24.mp4	VO	Song	Angry	Strong	Kids	R2	A24	2	2	5	2	1	2	24	1	1	1	1	1	1	1	1	1	1
02-02-05-02-02-01-01.mp4	VO	Song	Angry	Strong	Dogs	R1	A1	2	2	5	2	2	1	1	1	1	1	1	1	1	1	1	1	1
02-02-05-02-02-01-02.mp4	VO	Song	Angry	Strong	Dogs	R1	A2	2	2	5	2	2	1	2	1	1	1	1	1	1	1	1	1	1
02-02-05-02-02-01-03.mp4	VO	Song	Angry	Strong	Dogs	R1	A3	2	2	5	2	2	1	3	1	1	1	1	1	1	1	0	1	1
02-02-05-02-02-01-04.mp4	VO	Song	Angry	Strong	Dogs	R1	A4	2	2	5	2	2	1	4	1	1	1	1	1	1	1	1	1	1
02-02-05-02-02-01-05.mp4	VO	Song	Angry	Strong	Dogs	R1	A5	2	2	5	2	2	1	5	1	1	1	1	1	1	1	1	1	1
02-02-05-02-02-01-06.mp4	VO	Song	Angry	Strong	Dogs	R1	A6	2	2	5	2	2	1	6	1	0	1	1	1	1	0	1	1	1
02-02-05-02-02-01-07.mp4	VO	Song	Angry	Strong	Dogs	R1	A7	2	2	5	2	2	1	7	1	1	1	1	1	1	1	1	1	1
02-02-05-02-02-01-08.mp4	VO	Song	Angry	Strong	Dogs	R1	A8	2	2	5	2	2	1	8	1	1	1	1	1	1	1	1	1	1
02-02-05-02-02-01-09.mp4	VO	Song	Angry	Strong	Dogs	R1	A9	2	2	5	2	2	1	9	1	1	1	1	1	1	1	1	1	1
02-02-05-02-02-01-10.mp4	VO	Song	Angry	Strong	Dogs	R1	A10	2	2	5	2	2	1	10	1	1	1	1	1	1	1	1	1	1
02-02-05-02-02-01-11.mp4	VO	Song	Angry	Strong	Dogs	R1	A11	2	2	5	2	2	1	11	1	1	1	1	0	1	0	1	1	0
02-02-05-02-02-01-12.mp4	VO	Song	Angry	Strong	Dogs	R1	A12	2	2	5	2	2	1	12	1	1	1	1	1	1	1	1	1	1
02-02-05-02-02-01-13.mp4	VO	Song	Angry	Strong	Dogs	R1	A13	2	2	5	2	2	1	13	1	1	1	1	1	1	1	1	1	1
02-02-05-02-02-01-14.mp4	VO	Song	Angry	Strong	Dogs	R1	A14	2	2	5	2	2	1	14	1	1	0	1	1	0	1	0	1	1
02-02-05-02-02-01-15.mp4	VO	Song	Angry	Strong	Dogs	R1	A15	2	2	5	2	2	1	15	0	0	1	1	1	0	1	1	0	1
02-02-05-02-02-01-16.mp4	VO	Song	Angry	Strong	Dogs	R1	A16	2	2	5	2	2	1	16	1	1	1	1	1	1	1	1	1	1
02-02-05-02-02-01-17.mp4	VO	Song	Angry	Strong	Dogs	R1	A17	2	2	5	2	2	1	17	0	1	1	1	0	1	1	1	1	1
02-02-05-02-02-01-19.mp4	VO	Song	Angry	Strong	Dogs	R1	A19	2	2	5	2	2	1	19	1	1	1	1	1	1	1	1	1	1
02-02-05-02-02-01-20.mp4	VO	Song	Angry	Strong	Dogs	R1	A20	2	2	5	2	2	1	20	0	0	0	0	0	1	0	0	1	1
02-02-05-02-02-01-21.mp4	VO	Song	Angry	Strong	Dogs	R1	A21	2	2	5	2	2	1	21	0	1	1	1	1	0	1	1	1	1
02-02-05-02-02-01-22.mp4	VO	Song	Angry	Strong	Dogs	R1	A22	2	2	5	2	2	1	22	1	1	1	1	1	0	1	1	1	1
02-02-05-02-02-01-23.mp4	VO	Song	Angry	Strong	Dogs	R1	A23	2	2	5	2	2	1	23	1	1	1	0	1	1	1	1	1	1
02-02-05-02-02-01-24.mp4	VO	Song	Angry	Strong	Dogs	R1	A24	2	2	5	2	2	1	24	1	1	1	1	1	1	1	1	1	1
02-02-05-02-02-02-01.mp4	VO	Song	Angry	Strong	Dogs	R2	A1	2	2	5	2	2	2	1	1	1	1	1	1	1	1	1	1	1
02-02-05-02-02-02-02.mp4	VO	Song	Angry	Strong	Dogs	R2	A2	2	2	5	2	2	2	2	1	1	1	1	1	1	1	0	1	1
02-02-05-02-02-02-03.mp4	VO	Song	Angry	Strong	Dogs	R2	A3	2	2	5	2	2	2	3	1	1	1	1	0	1	1	1	1	1
02-02-05-02-02-02-04.mp4	VO	Song	Angry	Strong	Dogs	R2	A4	2	2	5	2	2	2	4	1	1	1	1	1	1	1	1	1	1
02-02-05-02-02-02-05.mp4	VO	Song	Angry	Strong	Dogs	R2	A5	2	2	5	2	2	2	5	1	1	1	0	1	0	1	1	1	1
02-02-05-02-02-02-06.mp4	VO	Song	Angry	Strong	Dogs	R2	A6	2	2	5	2	2	2	6	1	1	1	1	1	1	1	1	1	1
02-02-05-02-02-02-07.mp4	VO	Song	Angry	Strong	Dogs	R2	A7	2	2	5	2	2	2	7	1	1	1	1	1	1	1	1	1	1
02-02-05-02-02-02-08.mp4	VO	Song	Angry	Strong	Dogs	R2	A8	2	2	5	2	2	2	8	1	1	1	1	1	1	1	1	1	1
02-02-05-02-02-02-09.mp4	VO	Song	Angry	Strong	Dogs	R2	A9	2	2	5	2	2	2	9	1	1	1	1	1	1	1	1	1	1
02-02-05-02-02-02-10.mp4	VO	Song	Angry	Strong	Dogs	R2	A10	2	2	5	2	2	2	10	1	1	1	1	1	1	1	1	1	0
02-02-05-02-02-02-11.mp4	VO	Song	Angry	Strong	Dogs	R2	A11	2	2	5	2	2	2	11	1	1	0	1	1	1	1	1	1	1
02-02-05-02-02-02-12.mp4	VO	Song	Angry	Strong	Dogs	R2	A12	2	2	5	2	2	2	12	1	1	1	1	1	1	1	1	1	1
02-02-05-02-02-02-13.mp4	VO	Song	Angry	Strong	Dogs	R2	A13	2	2	5	2	2	2	13	1	1	1	1	1	1	1	1	1	1
02-02-05-02-02-02-14.mp4	VO	Song	Angry	Strong	Dogs	R2	A14	2	2	5	2	2	2	14	1	1	1	1	1	1	1	1	1	1
02-02-05-02-02-02-15.mp4	VO	Song	Angry	Strong	Dogs	R2	A15	2	2	5	2	2	2	15	1	0	1	1	0	1	1	1	1	1
02-02-05-02-02-02-16.mp4	VO	Song	Angry	Strong	Dogs	R2	A16	2	2	5	2	2	2	16	1	1	1	1	1	1	1	1	1	1
02-02-05-02-02-02-17.mp4	VO	Song	Angry	Strong	Dogs	R2	A17	2	2	5	2	2	2	17	1	1	1	1	1	1	1	1	1	1
02-02-05-02-02-02-19.mp4	VO	Song	Angry	Strong	Dogs	R2	A19	2	2	5	2	2	2	19	1	1	0	1	1	1	1	1	1	1
02-02-05-02-02-02-20.mp4	VO	Song	Angry	Strong	Dogs	R2	A20	2	2	5	2	2	2	20	1	0	0	0	1	1	0	0	1	1
02-02-05-02-02-02-21.mp4	VO	Song	Angry	Strong	Dogs	R2	A21	2	2	5	2	2	2	21	1	1	1	1	1	1	1	1	1	1
02-02-05-02-02-02-22.mp4	VO	Song	Angry	Strong	Dogs	R2	A22	2	2	5	2	2	2	22	1	0	1	1	1	1	1	1	1	1
02-02-05-02-02-02-23.mp4	VO	Song	Angry	Strong	Dogs	R2	A23	2	2	5	2	2	2	23	1	1	1	1	1	1	1	1	1	1
02-02-05-02-02-02-24.mp4	VO	Song	Angry	Strong	Dogs	R2	A24	2	2	5	2	2	2	24	1	1	1	1	1	1	0	1	1	1
02-02-06-01-01-01-01.mp4	VO	Song	Fearful	Normal	Kids	R1	A1	2	2	6	1	1	1	1	0	0	0	0	0	0	1	0	0	0
02-02-06-01-01-01-02.mp4	VO	Song	Fearful	Normal	Kids	R1	A2	2	2	6	1	1	1	2	1	0	0	0	0	0	0	0	1	0
02-02-06-01-01-01-03.mp4	VO	Song	Fearful	Normal	Kids	R1	A3	2	2	6	1	1	1	3	1	1	0	0	0	1	1	0	0	1
02-02-06-01-01-01-04.mp4	VO	Song	Fearful	Normal	Kids	R1	A4	2	2	6	1	1	1	4	1	1	1	1	1	1	1	1	1	1
02-02-06-01-01-01-05.mp4	VO	Song	Fearful	Normal	Kids	R1	A5	2	2	6	1	1	1	5	1	1	1	1	1	1	1	1	1	1
02-02-06-01-01-01-06.mp4	VO	Song	Fearful	Normal	Kids	R1	A6	2	2	6	1	1	1	6	0	0	0	0	1	0	0	1	1	1
02-02-06-01-01-01-07.mp4	VO	Song	Fearful	Normal	Kids	R1	A7	2	2	6	1	1	1	7	1	0	0	1	1	0	1	1	1	1
02-02-06-01-01-01-08.mp4	VO	Song	Fearful	Normal	Kids	R1	A8	2	2	6	1	1	1	8	1	1	1	1	1	0	1	1	1	1
02-02-06-01-01-01-09.mp4	VO	Song	Fearful	Normal	Kids	R1	A9	2	2	6	1	1	1	9	1	1	1	0	1	1	1	1	1	0
02-02-06-01-01-01-10.mp4	VO	Song	Fearful	Normal	Kids	R1	A10	2	2	6	1	1	1	10	0	0	0	0	0	0	0	0	1	1
02-02-06-01-01-01-11.mp4	VO	Song	Fearful	Normal	Kids	R1	A11	2	2	6	1	1	1	11	1	0	1	0	1	1	1	0	1	0
02-02-06-01-01-01-12.mp4	VO	Song	Fearful	Normal	Kids	R1	A12	2	2	6	1	1	1	12	1	1	0	1	1	1	1	1	1	0
02-02-06-01-01-01-13.mp4	VO	Song	Fearful	Normal	Kids	R1	A13	2	2	6	1	1	1	13	0	0	0	0	0	0	0	0	0	0
02-02-06-01-01-01-14.mp4	VO	Song	Fearful	Normal	Kids	R1	A14	2	2	6	1	1	1	14	0	0	0	0	1	1	1	0	1	0
02-02-06-01-01-01-15.mp4	VO	Song	Fearful	Normal	Kids	R1	A15	2	2	6	1	1	1	15	1	1	1	0	0	1	0	0	1	1
02-02-06-01-01-01-16.mp4	VO	Song	Fearful	Normal	Kids	R1	A16	2	2	6	1	1	1	16	1	1	1	1	1	1	1	1	1	1
02-02-06-01-01-01-17.mp4	VO	Song	Fearful	Normal	Kids	R1	A17	2	2	6	1	1	1	17	0	0	1	1	0	0	0	0	1	1
02-02-06-01-01-01-19.mp4	VO	Song	Fearful	Normal	Kids	R1	A19	2	2	6	1	1	1	19	1	0	1	1	0	1	1	0	1	1
02-02-06-01-01-01-20.mp4	VO	Song	Fearful	Normal	Kids	R1	A20	2	2	6	1	1	1	20	1	1	1	1	1	1	1	1	1	1
02-02-06-01-01-01-21.mp4	VO	Song	Fearful	Normal	Kids	R1	A21	2	2	6	1	1	1	21	0	1	1	1	1	1	1	1	1	1
02-02-06-01-01-01-22.mp4	VO	Song	Fearful	Normal	Kids	R1	A22	2	2	6	1	1	1	22	1	0	0	1	1	1	1	1	1	1
02-02-06-01-01-01-23.mp4	VO	Song	Fearful	Normal	Kids	R1	A23	2	2	6	1	1	1	23	0	1	1	0	1	0	1	1	1	0
02-02-06-01-01-01-24.mp4	VO	Song	Fearful	Normal	Kids	R1	A24	2	2	6	1	1	1	24	1	1	1	0	0	1	1	1	1	1
02-02-06-01-01-02-01.mp4	VO	Song	Fearful	Normal	Kids	R2	A1	2	2	6	1	1	2	1	0	0	0	0	0	0	0	0	0	0
02-02-06-01-01-02-02.mp4	VO	Song	Fearful	Normal	Kids	R2	A2	2	2	6	1	1	2	2	0	1	1	1	0	0	1	1	0	0
02-02-06-01-01-02-03.mp4	VO	Song	Fearful	Normal	Kids	R2	A3	2	2	6	1	1	2	3	0	1	0	0	1	0	0	1	0	0
02-02-06-01-01-02-04.mp4	VO	Song	Fearful	Normal	Kids	R2	A4	2	2	6	1	1	2	4	1	1	1	1	1	1	1	1	1	0
02-02-06-01-01-02-05.mp4	VO	Song	Fearful	Normal	Kids	R2	A5	2	2	6	1	1	2	5	1	1	1	1	1	0	1	1	1	1
02-02-06-01-01-02-06.mp4	VO	Song	Fearful	Normal	Kids	R2	A6	2	2	6	1	1	2	6	1	1	1	1	0	1	0	1	1	0
02-02-06-01-01-02-07.mp4	VO	Song	Fearful	Normal	Kids	R2	A7	2	2	6	1	1	2	7	0	1	0	1	1	1	1	1	1	0
02-02-06-01-01-02-08.mp4	VO	Song	Fearful	Normal	Kids	R2	A8	2	2	6	1	1	2	8	1	1	1	1	1	1	1	1	1	1
02-02-06-01-01-02-09.mp4	VO	Song	Fearful	Normal	Kids	R2	A9	2	2	6	1	1	2	9	1	1	0	1	0	1	1	1	1	0
02-02-06-01-01-02-10.mp4	VO	Song	Fearful	Normal	Kids	R2	A10	2	2	6	1	1	2	10	0	0	0	1	0	0	1	1	0	0
02-02-06-01-01-02-11.mp4	VO	Song	Fearful	Normal	Kids	R2	A11	2	2	6	1	1	2	11	1	1	1	1	1	1	1	1	1	1
02-02-06-01-01-02-12.mp4	VO	Song	Fearful	Normal	Kids	R2	A12	2	2	6	1	1	2	12	1	1	0	0	1	1	1	1	1	0
02-02-06-01-01-02-13.mp4	VO	Song	Fearful	Normal	Kids	R2	A13	2	2	6	1	1	2	13	0	0	0	0	0	0	1	0	0	0
02-02-06-01-01-02-14.mp4	VO	Song	Fearful	Normal	Kids	R2	A14	2	2	6	1	1	2	14	0	1	1	1	1	1	1	0	1	1
02-02-06-01-01-02-15.mp4	VO	Song	Fearful	Normal	Kids	R2	A15	2	2	6	1	1	2	15	0	0	0	0	1	0	0	0	0	1
02-02-06-01-01-02-16.mp4	VO	Song	Fearful	Normal	Kids	R2	A16	2	2	6	1	1	2	16	1	1	1	1	1	1	1	1	1	1
02-02-06-01-01-02-17.mp4	VO	Song	Fearful	Normal	Kids	R2	A17	2	2	6	1	1	2	17	0	0	0	0	0	0	0	1	0	1
02-02-06-01-01-02-19.mp4	VO	Song	Fearful	Normal	Kids	R2	A19	2	2	6	1	1	2	19	0	0	0	0	1	0	0	1	1	0
02-02-06-01-01-02-20.mp4	VO	Song	Fearful	Normal	Kids	R2	A20	2	2	6	1	1	2	20	1	1	1	1	1	1	1	0	1	1
02-02-06-01-01-02-21.mp4	VO	Song	Fearful	Normal	Kids	R2	A21	2	2	6	1	1	2	21	1	1	1	1	1	0	1	1	1	1
02-02-06-01-01-02-22.mp4	VO	Song	Fearful	Normal	Kids	R2	A22	2	2	6	1	1	2	22	1	1	0	1	0	0	1	0	1	0
02-02-06-01-01-02-23.mp4	VO	Song	Fearful	Normal	Kids	R2	A23	2	2	6	1	1	2	23	1	1	1	1	1	1	1	1	1	1
02-02-06-01-01-02-24.mp4	VO	Song	Fearful	Normal	Kids	R2	A24	2	2	6	1	1	2	24	1	1	1	1	0	1	1	1	0	1
02-02-06-01-02-01-01.mp4	VO	Song	Fearful	Normal	Dogs	R1	A1	2	2	6	1	2	1	1	0	0	0	0	0	1	1	1	1	1
02-02-06-01-02-01-02.mp4	VO	Song	Fearful	Normal	Dogs	R1	A2	2	2	6	1	2	1	2	0	1	0	1	1	0	0	0	1	1
02-02-06-01-02-01-03.mp4	VO	Song	Fearful	Normal	Dogs	R1	A3	2	2	6	1	2	1	3	0	1	1	1	1	0	1	1	1	0
02-02-06-01-02-01-04.mp4	VO	Song	Fearful	Normal	Dogs	R1	A4	2	2	6	1	2	1	4	1	1	1	1	1	1	1	1	1	1
02-02-06-01-02-01-05.mp4	VO	Song	Fearful	Normal	Dogs	R1	A5	2	2	6	1	2	1	5	1	0	1	1	1	1	1	1	1	0
02-02-06-01-02-01-06.mp4	VO	Song	Fearful	Normal	Dogs	R1	A6	2	2	6	1	2	1	6	0	1	1	0	0	0	0	1	0	0
02-02-06-01-02-01-07.mp4	VO	Song	Fearful	Normal	Dogs	R1	A7	2	2	6	1	2	1	7	0	0	1	0	0	0	0	0	0	0
02-02-06-01-02-01-08.mp4	VO	Song	Fearful	Normal	Dogs	R1	A8	2	2	6	1	2	1	8	1	1	1	1	1	1	1	0	1	1
02-02-06-01-02-01-09.mp4	VO	Song	Fearful	Normal	Dogs	R1	A9	2	2	6	1	2	1	9	1	1	1	0	1	1	1	1	1	1
02-02-06-01-02-01-10.mp4	VO	Song	Fearful	Normal	Dogs	R1	A10	2	2	6	1	2	1	10	1	0	0	1	1	1	1	1	0	0
02-02-06-01-02-01-11.mp4	VO	Song	Fearful	Normal	Dogs	R1	A11	2	2	6	1	2	1	11	1	0	0	1	1	0	0	1	1	0
02-02-06-01-02-01-12.mp4	VO	Song	Fearful	Normal	Dogs	R1	A12	2	2	6	1	2	1	12	1	1	1	1	1	1	1	1	0	0
02-02-06-01-02-01-13.mp4	VO	Song	Fearful	Normal	Dogs	R1	A13	2	2	6	1	2	1	13	1	0	0	0	0	0	1	0	0	0
02-02-06-01-02-01-14.mp4	VO	Song	Fearful	Normal	Dogs	R1	A14	2	2	6	1	2	1	14	1	1	1	0	1	1	1	1	1	1
02-02-06-01-02-01-15.mp4	VO	Song	Fearful	Normal	Dogs	R1	A15	2	2	6	1	2	1	15	0	1	0	0	1	0	1	0	1	1
02-02-06-01-02-01-16.mp4	VO	Song	Fearful	Normal	Dogs	R1	A16	2	2	6	1	2	1	16	0	1	0	1	1	1	1	1	1	1
02-02-06-01-02-01-17.mp4	VO	Song	Fearful	Normal	Dogs	R1	A17	2	2	6	1	2	1	17	0	1	0	1	0	0	0	1	1	0
02-02-06-01-02-01-19.mp4	VO	Song	Fearful	Normal	Dogs	R1	A19	2	2	6	1	2	1	19	1	1	0	0	1	1	1	0	0	0
02-02-06-01-02-01-20.mp4	VO	Song	Fearful	Normal	Dogs	R1	A20	2	2	6	1	2	1	20	1	1	1	1	1	0	1	1	1	1
02-02-06-01-02-01-21.mp4	VO	Song	Fearful	Normal	Dogs	R1	A21	2	2	6	1	2	1	21	1	1	1	1	1	1	0	1	1	1
02-02-06-01-02-01-22.mp4	VO	Song	Fearful	Normal	Dogs	R1	A22	2	2	6	1	2	1	22	1	1	1	0	1	1	1	0	1	0
02-02-06-01-02-01-23.mp4	VO	Song	Fearful	Normal	Dogs	R1	A23	2	2	6	1	2	1	23	1	1	1	1	1	1	0	1	1	0
02-02-06-01-02-01-24.mp4	VO	Song	Fearful	Normal	Dogs	R1	A24	2	2	6	1	2	1	24	1	1	1	1	1	1	1	1	1	1
02-02-06-01-02-02-01.mp4	VO	Song	Fearful	Normal	Dogs	R2	A1	2	2	6	1	2	2	1	0	1	1	0	0	1	1	0	0	1
02-02-06-01-02-02-02.mp4	VO	Song	Fearful	Normal	Dogs	R2	A2	2	2	6	1	2	2	2	0	1	1	1	0	1	1	1	0	1
02-02-06-01-02-02-03.mp4	VO	Song	Fearful	Normal	Dogs	R2	A3	2	2	6	1	2	2	3	1	1	1	0	0	1	0	1	0	1
02-02-06-01-02-02-04.mp4	VO	Song	Fearful	Normal	Dogs	R2	A4	2	2	6	1	2	2	4	1	1	1	1	1	1	1	1	0	1
02-02-06-01-02-02-05.mp4	VO	Song	Fearful	Normal	Dogs	R2	A5	2	2	6	1	2	2	5	1	1	1	0	1	1	1	1	0	1
02-02-06-01-02-02-06.mp4	VO	Song	Fearful	Normal	Dogs	R2	A6	2	2	6	1	2	2	6	0	0	0	1	1	0	0	1	1	0
02-02-06-01-02-02-07.mp4	VO	Song	Fearful	Normal	Dogs	R2	A7	2	2	6	1	2	2	7	1	1	0	0	0	1	0	0	0	1
02-02-06-01-02-02-08.mp4	VO	Song	Fearful	Normal	Dogs	R2	A8	2	2	6	1	2	2	8	1	1	1	1	1	1	1	1	1	1
02-02-06-01-02-02-09.mp4	VO	Song	Fearful	Normal	Dogs	R2	A9	2	2	6	1	2	2	9	1	1	1	1	1	1	1	1	1	1
02-02-06-01-02-02-10.mp4	VO	Song	Fearful	Normal	Dogs	R2	A10	2	2	6	1	2	2	10	0	0	1	0	0	0	0	1	0	1
02-02-06-01-02-02-11.mp4	VO	Song	Fearful	Normal	Dogs	R2	A11	2	2	6	1	2	2	11	0	1	0	1	1	0	1	1	1	1
02-02-06-01-02-02-12.mp4	VO	Song	Fearful	Normal	Dogs	R2	A12	2	2	6	1	2	2	12	1	1	1	1	1	1	1	1	0	1
02-02-06-01-02-02-13.mp4	VO	Song	Fearful	Normal	Dogs	R2	A13	2	2	6	1	2	2	13	0	0	0	0	0	0	0	0	0	0
02-02-06-01-02-02-14.mp4	VO	Song	Fearful	Normal	Dogs	R2	A14	2	2	6	1	2	2	14	1	1	1	1	1	1	1	1	1	1
02-02-06-01-02-02-15.mp4	VO	Song	Fearful	Normal	Dogs	R2	A15	2	2	6	1	2	2	15	0	0	0	1	1	0	1	1	1	1
02-02-06-01-02-02-16.mp4	VO	Song	Fearful	Normal	Dogs	R2	A16	2	2	6	1	2	2	16	0	0	0	0	1	1	1	1	1	1
02-02-06-01-02-02-17.mp4	VO	Song	Fearful	Normal	Dogs	R2	A17	2	2	6	1	2	2	17	0	0	0	0	0	1	1	0	1	0
02-02-06-01-02-02-19.mp4	VO	Song	Fearful	Normal	Dogs	R2	A19	2	2	6	1	2	2	19	0	0	0	0	0	1	0	1	0	1
02-02-06-01-02-02-20.mp4	VO	Song	Fearful	Normal	Dogs	R2	A20	2	2	6	1	2	2	20	1	1	1	1	1	1	1	1	0	1
02-02-06-01-02-02-21.mp4	VO	Song	Fearful	Normal	Dogs	R2	A21	2	2	6	1	2	2	21	0	0	0	1	1	1	0	0	0	1
02-02-06-01-02-02-22.mp4	VO	Song	Fearful	Normal	Dogs	R2	A22	2	2	6	1	2	2	22	1	1	0	0	1	1	1	1	1	1
02-02-06-01-02-02-23.mp4	VO	Song	Fearful	Normal	Dogs	R2	A23	2	2	6	1	2	2	23	1	1	1	0	1	1	1	1	1	1
02-02-06-01-02-02-24.mp4	VO	Song	Fearful	Normal	Dogs	R2	A24	2	2	6	1	2	2	24	1	0	1	1	1	0	1	1	0	1
02-02-06-02-01-01-01.mp4	VO	Song	Fearful	Strong	Kids	R1	A1	2	2	6	2	1	1	1	0	0	1	0	0	0	1	0	0	0
02-02-06-02-01-01-02.mp4	VO	Song	Fearful	Strong	Kids	R1	A2	2	2	6	2	1	1	2	0	1	1	0	0	1	1	1	1	1
02-02-06-02-01-01-03.mp4	VO	Song	Fearful	Strong	Kids	R1	A3	2	2	6	2	1	1	3	1	1	1	1	1	1	1	0	0	0
02-02-06-02-01-01-04.mp4	VO	Song	Fearful	Strong	Kids	R1	A4	2	2	6	2	1	1	4	1	0	1	0	1	1	0	1	0	1
02-02-06-02-01-01-05.mp4	VO	Song	Fearful	Strong	Kids	R1	A5	2	2	6	2	1	1	5	1	1	1	1	1	1	1	1	0	0
02-02-06-02-01-01-06.mp4	VO	Song	Fearful	Strong	Kids	R1	A6	2	2	6	2	1	1	6	1	1	0	1	0	1	1	1	1	1
02-02-06-02-01-01-07.mp4	VO	Song	Fearful	Strong	Kids	R1	A7	2	2	6	2	1	1	7	1	1	1	1	1	1	1	1	1	1
02-02-06-02-01-01-08.mp4	VO	Song	Fearful	Strong	Kids	R1	A8	2	2	6	2	1	1	8	1	1	1	1	1	1	1	0	1	1
02-02-06-02-01-01-09.mp4	VO	Song	Fearful	Strong	Kids	R1	A9	2	2	6	2	1	1	9	1	1	1	1	1	1	0	1	1	1
02-02-06-02-01-01-10.mp4	VO	Song	Fearful	Strong	Kids	R1	A10	2	2	6	2	1	1	10	1	0	1	0	1	0	1	1	1	1
02-02-06-02-01-01-11.mp4	VO	Song	Fearful	Strong	Kids	R1	A11	2	2	6	2	1	1	11	1	1	1	1	1	1	1	1	1	1
02-02-06-02-01-01-12.mp4	VO	Song	Fearful	Strong	Kids	R1	A12	2	2	6	2	1	1	12	1	1	1	1	1	1	1	1	1	1
02-02-06-02-01-01-13.mp4	VO	Song	Fearful	Strong	Kids	R1	A13	2	2	6	2	1	1	13	0	1	1	0	1	1	1	1	0	0
02-02-06-02-01-01-14.mp4	VO	Song	Fearful	Strong	Kids	R1	A14	2	2	6	2	1	1	14	0	1	1	1	1	1	1	1	1	1
02-02-06-02-01-01-15.mp4	VO	Song	Fearful	Strong	Kids	R1	A15	2	2	6	2	1	1	15	1	0	1	0	1	1	1	1	1	1
02-02-06-02-01-01-16.mp4	VO	Song	Fearful	Strong	Kids	R1	A16	2	2	6	2	1	1	16	1	1	1	1	1	1	1	1	1	1
02-02-06-02-01-01-17.mp4	VO	Song	Fearful	Strong	Kids	R1	A17	2	2	6	2	1	1	17	1	1	1	1	1	1	0	1	1	0
02-02-06-02-01-01-19.mp4	VO	Song	Fearful	Strong	Kids	R1	A19	2	2	6	2	1	1	19	0	1	0	0	0	1	0	1	1	0
02-02-06-02-01-01-20.mp4	VO	Song	Fearful	Strong	Kids	R1	A20	2	2	6	2	1	1	20	1	1	1	1	1	0	1	1	1	1
02-02-06-02-01-01-21.mp4	VO	Song	Fearful	Strong	Kids	R1	A21	2	2	6	2	1	1	21	1	1	1	1	1	1	1	1	1	1
02-02-06-02-01-01-22.mp4	VO	Song	Fearful	Strong	Kids	R1	A22	2	2	6	2	1	1	22	0	1	1	1	1	0	0	1	1	1
02-02-06-02-01-01-23.mp4	VO	Song	Fearful	Strong	Kids	R1	A23	2	2	6	2	1	1	23	1	1	1	1	1	1	1	1	1	1
02-02-06-02-01-01-24.mp4	VO	Song	Fearful	Strong	Kids	R1	A24	2	2	6	2	1	1	24	1	1	1	0	1	1	1	1	1	1
02-02-06-02-01-02-01.mp4	VO	Song	Fearful	Strong	Kids	R2	A1	2	2	6	2	1	2	1	0	0	1	1	1	1	0	1	1	0
02-02-06-02-01-02-02.mp4	VO	Song	Fearful	Strong	Kids	R2	A2	2	2	6	2	1	2	2	1	1	1	1	1	0	0	1	1	1
02-02-06-02-01-02-03.mp4	VO	Song	Fearful	Strong	Kids	R2	A3	2	2	6	2	1	2	3	0	0	0	0	0	1	1	1	0	1
02-02-06-02-01-02-04.mp4	VO	Song	Fearful	Strong	Kids	R2	A4	2	2	6	2	1	2	4	1	1	0	1	1	1	1	1	1	0
02-02-06-02-01-02-05.mp4	VO	Song	Fearful	Strong	Kids	R2	A5	2	2	6	2	1	2	5	1	1	1	1	1	1	1	0	1	1
02-02-06-02-01-02-06.mp4	VO	Song	Fearful	Strong	Kids	R2	A6	2	2	6	2	1	2	6	0	0	0	1	0	0	1	0	0	0
02-02-06-02-01-02-07.mp4	VO	Song	Fearful	Strong	Kids	R2	A7	2	2	6	2	1	2	7	1	1	1	1	1	1	1	1	1	1
02-02-06-02-01-02-08.mp4	VO	Song	Fearful	Strong	Kids	R2	A8	2	2	6	2	1	2	8	0	1	1	1	1	1	1	1	1	1
02-02-06-02-01-02-09.mp4	VO	Song	Fearful	Strong	Kids	R2	A9	2	2	6	2	1	2	9	1	1	1	1	1	1	1	1	1	1
02-02-06-02-01-02-10.mp4	VO	Song	Fearful	Strong	Kids	R2	A10	2	2	6	2	1	2	10	0	1	0	0	0	0	1	0	0	0
02-02-06-02-01-02-11.mp4	VO	Song	Fearful	Strong	Kids	R2	A11	2	2	6	2	1	2	11	1	1	1	1	0	1	0	0	1	0
02-02-06-02-01-02-12.mp4	VO	Song	Fearful	Strong	Kids	R2	A12	2	2	6	2	1	2	12	0	1	1	1	1	1	1	1	1	1
02-02-06-02-01-02-13.mp4	VO	Song	Fearful	Strong	Kids	R2	A13	2	2	6	2	1	2	13	1	0	0	0	1	0	0	1	1	1
02-02-06-02-01-02-14.mp4	VO	Song	Fearful	Strong	Kids	R2	A14	2	2	6	2	1	2	14	1	1	1	0	1	1	1	1	1	1
02-02-06-02-01-02-15.mp4	VO	Song	Fearful	Strong	Kids	R2	A15	2	2	6	2	1	2	15	1	0	1	0	0	0	0	1	1	1
02-02-06-02-01-02-16.mp4	VO	Song	Fearful	Strong	Kids	R2	A16	2	2	6	2	1	2	16	1	0	1	0	0	1	0	0	0	1
02-02-06-02-01-02-17.mp4	VO	Song	Fearful	Strong	Kids	R2	A17	2	2	6	2	1	2	17	0	1	1	1	1	1	1	1	1	1
02-02-06-02-01-02-19.mp4	VO	Song	Fearful	Strong	Kids	R2	A19	2	2	6	2	1	2	19	0	1	1	1	0	0	1	1	0	1
02-02-06-02-01-02-20.mp4	VO	Song	Fearful	Strong	Kids	R2	A20	2	2	6	2	1	2	20	1	1	1	1	1	1	1	1	1	1
02-02-06-02-01-02-21.mp4	VO	Song	Fearful	Strong	Kids	R2	A21	2	2	6	2	1	2	21	1	1	1	1	1	1	1	1	0	1
02-02-06-02-01-02-22.mp4	VO	Song	Fearful	Strong	Kids	R2	A22	2	2	6	2	1	2	22	0	0	1	0	1	0	1	1	1	1
02-02-06-02-01-02-23.mp4	VO	Song	Fearful	Strong	Kids	R2	A23	2	2	6	2	1	2	23	1	1	1	1	1	1	1	1	1	0
02-02-06-02-01-02-24.mp4	VO	Song	Fearful	Strong	Kids	R2	A24	2	2	6	2	1	2	24	1	1	1	1	1	0	1	1	1	1
02-02-06-02-02-01-01.mp4	VO	Song	Fearful	Strong	Dogs	R1	A1	2	2	6	2	2	1	1	0	1	0	1	1	1	1	1	1	0
02-02-06-02-02-01-02.mp4	VO	Song	Fearful	Strong	Dogs	R1	A2	2	2	6	2	2	1	2	1	1	1	1	0	0	0	1	1	1
02-02-06-02-02-01-03.mp4	VO	Song	Fearful	Strong	Dogs	R1	A3	2	2	6	2	2	1	3	1	1	1	1	1	1	0	0	1	0
02-02-06-02-02-01-04.mp4	VO	Song	Fearful	Strong	Dogs	R1	A4	2	2	6	2	2	1	4	1	1	0	1	0	0	1	1	1	1
02-02-06-02-02-01-05.mp4	VO	Song	Fearful	Strong	Dogs	R1	A5	2	2	6	2	2	1	5	1	1	1	1	1	1	1	1	0	1
02-02-06-02-02-01-06.mp4	VO	Song	Fearful	Strong	Dogs	R1	A6	2	2	6	2	2	1	6	1	0	1	1	0	1	0	0	0	1
02-02-06-02-02-01-07.mp4	VO	Song	Fearful	Strong	Dogs	R1	A7	2	2	6	2	2	1	7	1	1	1	1	1	1	1	0	0	1
02-02-06-02-02-01-08.mp4	VO	Song	Fearful	Strong	Dogs	R1	A8	2	2	6	2	2	1	8	1	1	1	1	1	1	1	1	1	1
02-02-06-02-02-01-09.mp4	VO	Song	Fearful	Strong	Dogs	R1	A9	2	2	6	2	2	1	9	1	0	1	1	1	1	1	1	1	1
02-02-06-02-02-01-10.mp4	VO	Song	Fearful	Strong	Dogs	R1	A10	2	2	6	2	2	1	10	0	1	0	1	0	1	1	0	0	0
02-02-06-02-02-01-11.mp4	VO	Song	Fearful	Strong	Dogs	R1	A11	2	2	6	2	2	1	11	1	1	1	1	1	1	1	1	0	1
02-02-06-02-02-01-12.mp4	VO	Song	Fearful	Strong	Dogs	R1	A12	2	2	6	2	2	1	12	0	1	0	1	1	0	1	1	1	1
02-02-06-02-02-01-13.mp4	VO	Song	Fearful	Strong	Dogs	R1	A13	2	2	6	2	2	1	13	1	0	1	1	0	1	0	0	1	0
02-02-06-02-02-01-14.mp4	VO	Song	Fearful	Strong	Dogs	R1	A14	2	2	6	2	2	1	14	1	1	1	1	1	1	1	1	1	1
02-02-06-02-02-01-15.mp4	VO	Song	Fearful	Strong	Dogs	R1	A15	2	2	6	2	2	1	15	0	0	0	1	1	1	1	0	1	0
02-02-06-02-02-01-16.mp4	VO	Song	Fearful	Strong	Dogs	R1	A16	2	2	6	2	2	1	16	0	1	1	1	1	1	1	1	1	1
02-02-06-02-02-01-17.mp4	VO	Song	Fearful	Strong	Dogs	R1	A17	2	2	6	2	2	1	17	1	1	1	1	1	1	1	1	1	1
02-02-06-02-02-01-19.mp4	VO	Song	Fearful	Strong	Dogs	R1	A19	2	2	6	2	2	1	19	0	1	0	0	1	0	0	1	0	1
02-02-06-02-02-01-20.mp4	VO	Song	Fearful	Strong	Dogs	R1	A20	2	2	6	2	2	1	20	1	1	1	1	1	1	0	1	1	1
[truncated: 1,039 more rows]

## Sheet: Speech_EmoCategory
	Independent Variables														Dependent Variables
	IV Factor level strings							IV Factor level IDs							DV Individual ratings
Filename	Modality	Channel	Emotion	Intensity	Statement	Repetition	Actor	ModalityID	ChannelID	EmotionID	IntensityID	StatementID	RepetitionID	ActorID	R1	R2	R3	R4	R5	R6	R7	R8	R9	R10
01-01-01-01-01-01-01.mp4	AV	Speech	Neutral	Normal	Kids	R1	A1	1	1	1	1	1	1	1	7	1	1	2	1	2	1	1	2	1
01-01-01-01-01-01-02.mp4	AV	Speech	Neutral	Normal	Kids	R1	A2	1	1	1	1	1	1	2	2	9	1	1	2	2	1	1	1	1
01-01-01-01-01-01-03.mp4	AV	Speech	Neutral	Normal	Kids	R1	A3	1	1	1	1	1	1	3	1	1	2	1	1	1	2	1	1	1
01-01-01-01-01-01-04.mp4	AV	Speech	Neutral	Normal	Kids	R1	A4	1	1	1	1	1	1	4	2	1	2	1	1	2	2	1	1	1
01-01-01-01-01-01-05.mp4	AV	Speech	Neutral	Normal	Kids	R1	A5	1	1	1	1	1	1	5	1	1	1	2	1	1	1	1	1	2
01-01-01-01-01-01-06.mp4	AV	Speech	Neutral	Normal	Kids	R1	A6	1	1	1	1	1	1	6	1	1	1	5	1	1	1	1	1	5
01-01-01-01-01-01-07.mp4	AV	Speech	Neutral	Normal	Kids	R1	A7	1	1	1	1	1	1	7	2	1	1	1	2	9	1	2	2	1
01-01-01-01-01-01-08.mp4	AV	Speech	Neutral	Normal	Kids	R1	A8	1	1	1	1	1	1	8	2	1	2	2	1	1	1	1	2	7
01-01-01-01-01-01-09.mp4	AV	Speech	Neutral	Normal	Kids	R1	A9	1	1	1	1	1	1	9	1	1	1	2	1	2	5	1	2	1
01-01-01-01-01-01-10.mp4	AV	Speech	Neutral	Normal	Kids	R1	A10	1	1	1	1	1	1	10	5	1	1	1	2	1	1	2	8	1
01-01-01-01-01-01-11.mp4	AV	Speech	Neutral	Normal	Kids	R1	A11	1	1	1	1	1	1	11	1	2	2	1	9	2	1	2	2	1
01-01-01-01-01-01-12.mp4	AV	Speech	Neutral	Normal	Kids	R1	A12	1	1	1	1	1	1	12	1	2	2	2	2	1	1	1	1	2
01-01-01-01-01-01-13.mp4	AV	Speech	Neutral	Normal	Kids	R1	A13	1	1	1	1	1	1	13	1	1	1	1	2	1	1	1	1	1
01-01-01-01-01-01-14.mp4	AV	Speech	Neutral	Normal	Kids	R1	A14	1	1	1	1	1	1	14	2	5	1	2	1	5	1	5	1	1
01-01-01-01-01-01-15.mp4	AV	Speech	Neutral	Normal	Kids	R1	A15	1	1	1	1	1	1	15	1	1	1	1	1	1	1	1	1	4
01-01-01-01-01-01-16.mp4	AV	Speech	Neutral	Normal	Kids	R1	A16	1	1	1	1	1	1	16	1	5	5	1	1	1	1	1	1	5
01-01-01-01-01-01-17.mp4	AV	Speech	Neutral	Normal	Kids	R1	A17	1	1	1	1	1	1	17	1	1	9	1	7	1	1	1	1	1
01-01-01-01-01-01-18.mp4	AV	Speech	Neutral	Normal	Kids	R1	A18	1	1	1	1	1	1	18	2	1	1	9	1	1	8	1	1	9
01-01-01-01-01-01-19.mp4	AV	Speech	Neutral	Normal	Kids	R1	A19	1	1	1	1	1	1	19	1	1	1	2	1	1	1	1	2	1
01-01-01-01-01-01-20.mp4	AV	Speech	Neutral	Normal	Kids	R1	A20	1	1	1	1	1	1	20	7	1	2	2	1	1	1	1	6	5
01-01-01-01-01-01-21.mp4	AV	Speech	Neutral	Normal	Kids	R1	A21	1	1	1	1	1	1	21	2	1	1	9	1	5	1	1	1	1
01-01-01-01-01-01-22.mp4	AV	Speech	Neutral	Normal	Kids	R1	A22	1	1	1	1	1	1	22	7	1	1	1	4	1	1	4	1	1
01-01-01-01-01-01-23.mp4	AV	Speech	Neutral	Normal	Kids	R1	A23	1	1	1	1	1	1	23	1	1	1	1	1	1	1	1	1	1
01-01-01-01-01-01-24.mp4	AV	Speech	Neutral	Normal	Kids	R1	A24	1	1	1	1	1	1	24	2	4	2	1	1	1	1	1	2	1
01-01-01-01-01-02-01.mp4	AV	Speech	Neutral	Normal	Kids	R2	A1	1	1	1	1	1	2	1	1	1	1	1	1	1	2	1	2	1
01-01-01-01-01-02-02.mp4	AV	Speech	Neutral	Normal	Kids	R2	A2	1	1	1	1	1	2	2	1	1	1	1	1	5	1	1	1	1
01-01-01-01-01-02-03.mp4	AV	Speech	Neutral	Normal	Kids	R2	A3	1	1	1	1	1	2	3	1	1	1	1	1	4	1	1	1	1
01-01-01-01-01-02-04.mp4	AV	Speech	Neutral	Normal	Kids	R2	A4	1	1	1	1	1	2	4	1	2	2	1	1	1	2	1	1	1
01-01-01-01-01-02-05.mp4	AV	Speech	Neutral	Normal	Kids	R2	A5	1	1	1	1	1	2	5	1	1	2	5	1	2	2	1	1	1
01-01-01-01-01-02-06.mp4	AV	Speech	Neutral	Normal	Kids	R2	A6	1	1	1	1	1	2	6	1	1	1	1	1	2	1	1	5	1
01-01-01-01-01-02-07.mp4	AV	Speech	Neutral	Normal	Kids	R2	A7	1	1	1	1	1	2	7	4	1	1	1	1	7	1	1	1	1
01-01-01-01-01-02-08.mp4	AV	Speech	Neutral	Normal	Kids	R2	A8	1	1	1	1	1	2	8	1	1	1	1	2	1	1	2	1	2
01-01-01-01-01-02-09.mp4	AV	Speech	Neutral	Normal	Kids	R2	A9	1	1	1	1	1	2	9	4	1	5	1	1	4	1	1	1	1
01-01-01-01-01-02-10.mp4	AV	Speech	Neutral	Normal	Kids	R2	A10	1	1	1	1	1	2	10	1	9	1	1	1	1	2	2	1	2
01-01-01-01-01-02-11.mp4	AV	Speech	Neutral	Normal	Kids	R2	A11	1	1	1	1	1	2	11	1	2	2	1	1	1	3	1	1	1
01-01-01-01-01-02-12.mp4	AV	Speech	Neutral	Normal	Kids	R2	A12	1	1	1	1	1	2	12	1	1	1	2	1	2	1	1	1	2
01-01-01-01-01-02-13.mp4	AV	Speech	Neutral	Normal	Kids	R2	A13	1	1	1	1	1	2	13	1	1	1	1	1	1	2	1	1	1
01-01-01-01-01-02-14.mp4	AV	Speech	Neutral	Normal	Kids	R2	A14	1	1	1	1	1	2	14	1	4	5	1	7	1	7	1	1	1
01-01-01-01-01-02-15.mp4	AV	Speech	Neutral	Normal	Kids	R2	A15	1	1	1	1	1	2	15	5	4	1	1	1	2	1	1	2	1
01-01-01-01-01-02-16.mp4	AV	Speech	Neutral	Normal	Kids	R2	A16	1	1	1	1	1	2	16	5	1	1	5	1	1	2	1	1	7
01-01-01-01-01-02-17.mp4	AV	Speech	Neutral	Normal	Kids	R2	A17	1	1	1	1	1	2	17	1	1	1	1	4	1	5	2	1	1
01-01-01-01-01-02-18.mp4	AV	Speech	Neutral	Normal	Kids	R2	A18	1	1	1	1	1	2	18	1	1	1	1	1	1	1	1	1	1
01-01-01-01-01-02-19.mp4	AV	Speech	Neutral	Normal	Kids	R2	A19	1	1	1	1	1	2	19	1	1	1	1	9	1	2	7	1	1
01-01-01-01-01-02-20.mp4	AV	Speech	Neutral	Normal	Kids	R2	A20	1	1	1	1	1	2	20	1	1	1	1	1	1	1	1	1	2
01-01-01-01-01-02-21.mp4	AV	Speech	Neutral	Normal	Kids	R2	A21	1	1	1	1	1	2	21	1	5	1	1	1	1	1	1	1	5
01-01-01-01-01-02-22.mp4	AV	Speech	Neutral	Normal	Kids	R2	A22	1	1	1	1	1	2	22	1	1	1	1	1	1	1	1	1	1
01-01-01-01-01-02-23.mp4	AV	Speech	Neutral	Normal	Kids	R2	A23	1	1	1	1	1	2	23	1	1	1	1	1	2	1	1	1	2
01-01-01-01-01-02-24.mp4	AV	Speech	Neutral	Normal	Kids	R2	A24	1	1	1	1	1	2	24	1	1	1	1	1	1	9	1	1	4
01-01-01-01-02-01-01.mp4	AV	Speech	Neutral	Normal	Dogs	R1	A1	1	1	1	1	2	1	1	1	1	2	1	2	2	1	1	2	1
01-01-01-01-02-01-02.mp4	AV	Speech	Neutral	Normal	Dogs	R1	A2	1	1	1	1	2	1	2	1	1	1	1	1	6	1	1	1	1
01-01-01-01-02-01-03.mp4	AV	Speech	Neutral	Normal	Dogs	R1	A3	1	1	1	1	2	1	3	1	2	5	1	5	1	7	4	2	5
01-01-01-01-02-01-04.mp4	AV	Speech	Neutral	Normal	Dogs	R1	A4	1	1	1	1	2	1	4	1	1	1	2	2	2	1	2	2	1
01-01-01-01-02-01-05.mp4	AV	Speech	Neutral	Normal	Dogs	R1	A5	1	1	1	1	2	1	5	1	1	1	1	1	1	1	1	1	1
01-01-01-01-02-01-06.mp4	AV	Speech	Neutral	Normal	Dogs	R1	A6	1	1	1	1	2	1	6	1	1	1	1	1	1	7	1	1	1
01-01-01-01-02-01-07.mp4	AV	Speech	Neutral	Normal	Dogs	R1	A7	1	1	1	1	2	1	7	4	1	1	1	4	1	2	2	1	2
01-01-01-01-02-01-08.mp4	AV	Speech	Neutral	Normal	Dogs	R1	A8	1	1	1	1	2	1	8	1	1	1	1	5	2	1	2	1	2
01-01-01-01-02-01-09.mp4	AV	Speech	Neutral	Normal	Dogs	R1	A9	1	1	1	1	2	1	9	1	7	2	2	2	1	2	1	1	2
01-01-01-01-02-01-10.mp4	AV	Speech	Neutral	Normal	Dogs	R1	A10	1	1	1	1	2	1	10	1	2	1	4	2	1	2	2	1	1
01-01-01-01-02-01-11.mp4	AV	Speech	Neutral	Normal	Dogs	R1	A11	1	1	1	1	2	1	11	1	2	2	2	1	2	1	2	1	1
01-01-01-01-02-01-12.mp4	AV	Speech	Neutral	Normal	Dogs	R1	A12	1	1	1	1	2	1	12	2	2	2	2	1	1	1	2	1	1
01-01-01-01-02-01-13.mp4	AV	Speech	Neutral	Normal	Dogs	R1	A13	1	1	1	1	2	1	13	1	1	1	1	1	1	7	1	1	1
01-01-01-01-02-01-14.mp4	AV	Speech	Neutral	Normal	Dogs	R1	A14	1	1	1	1	2	1	14	1	2	1	5	1	1	5	6	5	2
01-01-01-01-02-01-15.mp4	AV	Speech	Neutral	Normal	Dogs	R1	A15	1	1	1	1	2	1	15	1	2	2	1	1	1	2	1	1	1
01-01-01-01-02-01-16.mp4	AV	Speech	Neutral	Normal	Dogs	R1	A16	1	1	1	1	2	1	16	1	1	1	5	2	1	5	5	1	1
01-01-01-01-02-01-17.mp4	AV	Speech	Neutral	Normal	Dogs	R1	A17	1	1	1	1	2	1	17	1	2	1	1	2	1	5	1	2	1
01-01-01-01-02-01-18.mp4	AV	Speech	Neutral	Normal	Dogs	R1	A18	1	1	1	1	2	1	18	1	4	1	1	1	1	4	4	1	4
01-01-01-01-02-01-19.mp4	AV	Speech	Neutral	Normal	Dogs	R1	A19	1	1	1	1	2	1	19	1	7	4	4	2	1	7	1	1	2
01-01-01-01-02-01-20.mp4	AV	Speech	Neutral	Normal	Dogs	R1	A20	1	1	1	1	2	1	20	2	1	2	2	1	2	1	1	2	2
01-01-01-01-02-01-21.mp4	AV	Speech	Neutral	Normal	Dogs	R1	A21	1	1	1	1	2	1	21	1	1	1	1	1	1	1	1	1	1
01-01-01-01-02-01-22.mp4	AV	Speech	Neutral	Normal	Dogs	R1	A22	1	1	1	1	2	1	22	1	1	1	1	2	2	1	1	1	2
01-01-01-01-02-01-23.mp4	AV	Speech	Neutral	Normal	Dogs	R1	A23	1	1	1	1	2	1	23	1	1	1	2	1	1	1	2	1	2
01-01-01-01-02-01-24.mp4	AV	Speech	Neutral	Normal	Dogs	R1	A24	1	1	1	1	2	1	24	1	1	2	1	1	1	1	1	1	9
01-01-01-01-02-02-01.mp4	AV	Speech	Neutral	Normal	Dogs	R2	A1	1	1	1	1	2	2	1	1	2	2	2	2	4	1	6	1	4
01-01-01-01-02-02-02.mp4	AV	Speech	Neutral	Normal	Dogs	R2	A2	1	1	1	1	2	2	2	3	1	2	1	1	1	2	1	1	1
01-01-01-01-02-02-03.mp4	AV	Speech	Neutral	Normal	Dogs	R2	A3	1	1	1	1	2	2	3	1	1	1	1	1	1	4	5	4	5
01-01-01-01-02-02-04.mp4	AV	Speech	Neutral	Normal	Dogs	R2	A4	1	1	1	1	2	2	4	8	1	1	2	1	1	1	2	1	4
01-01-01-01-02-02-05.mp4	AV	Speech	Neutral	Normal	Dogs	R2	A5	1	1	1	1	2	2	5	1	1	1	1	1	4	1	1	1	1
01-01-01-01-02-02-06.mp4	AV	Speech	Neutral	Normal	Dogs	R2	A6	1	1	1	1	2	2	6	1	1	1	1	1	2	1	1	1	1
01-01-01-01-02-02-07.mp4	AV	Speech	Neutral	Normal	Dogs	R2	A7	1	1	1	1	2	2	7	1	1	1	2	1	2	1	1	1	1
01-01-01-01-02-02-08.mp4	AV	Speech	Neutral	Normal	Dogs	R2	A8	1	1	1	1	2	2	8	1	1	1	2	1	1	1	2	1	1
01-01-01-01-02-02-09.mp4	AV	Speech	Neutral	Normal	Dogs	R2	A9	1	1	1	1	2	2	9	4	1	1	1	1	2	2	1	1	1
01-01-01-01-02-02-10.mp4	AV	Speech	Neutral	Normal	Dogs	R2	A10	1	1	1	1	2	2	10	1	1	1	1	2	1	2	1	2	1
01-01-01-01-02-02-11.mp4	AV	Speech	Neutral	Normal	Dogs	R2	A11	1	1	1	1	2	2	11	1	1	2	1	1	2	1	1	1	1
01-01-01-01-02-02-12.mp4	AV	Speech	Neutral	Normal	Dogs	R2	A12	1	1	1	1	2	2	12	2	2	2	2	2	1	5	2	1	1
01-01-01-01-02-02-13.mp4	AV	Speech	Neutral	Normal	Dogs	R2	A13	1	1	1	1	2	2	13	1	1	1	1	1	2	2	1	1	1
01-01-01-01-02-02-14.mp4	AV	Speech	Neutral	Normal	Dogs	R2	A14	1	1	1	1	2	2	14	1	7	1	1	9	5	1	1	2	1
01-01-01-01-02-02-15.mp4	AV	Speech	Neutral	Normal	Dogs	R2	A15	1	1	1	1	2	2	15	4	1	1	1	1	2	1	1	2	1
01-01-01-01-02-02-16.mp4	AV	Speech	Neutral	Normal	Dogs	R2	A16	1	1	1	1	2	2	16	5	1	5	2	1	1	1	1	1	1
01-01-01-01-02-02-17.mp4	AV	Speech	Neutral	Normal	Dogs	R2	A17	1	1	1	1	2	2	17	2	1	1	2	1	1	1	1	9	1
01-01-01-01-02-02-18.mp4	AV	Speech	Neutral	Normal	Dogs	R2	A18	1	1	1	1	2	2	18	1	2	1	1	2	1	1	1	1	1
01-01-01-01-02-02-19.mp4	AV	Speech	Neutral	Normal	Dogs	R2	A19	1	1	1	1	2	2	19	1	2	1	1	2	2	2	9	1	1
01-01-01-01-02-02-20.mp4	AV	Speech	Neutral	Normal	Dogs	R2	A20	1	1	1	1	2	2	20	1	1	1	2	1	2	2	2	1	2
01-01-01-01-02-02-21.mp4	AV	Speech	Neutral	Normal	Dogs	R2	A21	1	1	1	1	2	2	21	1	1	5	1	1	1	1	2	9	1
01-01-01-01-02-02-22.mp4	AV	Speech	Neutral	Normal	Dogs	R2	A22	1	1	1	1	2	2	22	1	1	1	1	1	2	6	2	1	1
01-01-01-01-02-02-23.mp4	AV	Speech	Neutral	Normal	Dogs	R2	A23	1	1	1	1	2	2	23	1	1	2	1	1	2	1	1	1	6
01-01-01-01-02-02-24.mp4	AV	Speech	Neutral	Normal	Dogs	R2	A24	1	1	1	1	2	2	24	1	1	1	1	1	1	1	2	1	4
01-01-02-01-01-01-01.mp4	AV	Speech	Calm	Normal	Kids	R1	A1	1	1	2	1	1	1	1	2	2	2	2	3	3	1	2	2	2
01-01-02-01-01-01-02.mp4	AV	Speech	Calm	Normal	Kids	R1	A2	1	1	2	1	1	1	2	1	1	2	2	2	1	1	1	2	2
01-01-02-01-01-01-03.mp4	AV	Speech	Calm	Normal	Kids	R1	A3	1	1	2	1	1	1	3	2	2	2	3	1	1	9	1	1	9
01-01-02-01-01-01-04.mp4	AV	Speech	Calm	Normal	Kids	R1	A4	1	1	2	1	1	1	4	2	2	3	3	3	2	2	3	3	2
01-01-02-01-01-01-05.mp4	AV	Speech	Calm	Normal	Kids	R1	A5	1	1	2	1	1	1	5	3	3	3	3	9	3	3	3	3	3
01-01-02-01-01-01-06.mp4	AV	Speech	Calm	Normal	Kids	R1	A6	1	1	2	1	1	1	6	2	2	6	1	2	2	2	1	2	1
01-01-02-01-01-01-07.mp4	AV	Speech	Calm	Normal	Kids	R1	A7	1	1	2	1	1	1	7	2	2	2	3	2	3	2	1	2	1
01-01-02-01-01-01-08.mp4	AV	Speech	Calm	Normal	Kids	R1	A8	1	1	2	1	1	1	8	2	2	2	2	2	2	2	1	2	2
01-01-02-01-01-01-09.mp4	AV	Speech	Calm	Normal	Kids	R1	A9	1	1	2	1	1	1	9	9	4	1	2	1	2	2	1	3	2
01-01-02-01-01-01-10.mp4	AV	Speech	Calm	Normal	Kids	R1	A10	1	1	2	1	1	1	10	3	2	3	3	2	2	3	5	3	3
01-01-02-01-01-01-11.mp4	AV	Speech	Calm	Normal	Kids	R1	A11	1	1	2	1	1	1	11	2	1	2	1	2	2	2	1	2	2
01-01-02-01-01-01-12.mp4	AV	Speech	Calm	Normal	Kids	R1	A12	1	1	2	1	1	1	12	1	2	2	2	2	2	2	1	2	1
01-01-02-01-01-01-13.mp4	AV	Speech	Calm	Normal	Kids	R1	A13	1	1	2	1	1	1	13	2	7	1	2	2	1	2	4	2	1
01-01-02-01-01-01-14.mp4	AV	Speech	Calm	Normal	Kids	R1	A14	1	1	2	1	1	1	14	3	3	2	3	2	2	2	2	2	2
01-01-02-01-01-01-15.mp4	AV	Speech	Calm	Normal	Kids	R1	A15	1	1	2	1	1	1	15	2	2	2	2	2	2	2	2	2	2
01-01-02-01-01-01-16.mp4	AV	Speech	Calm	Normal	Kids	R1	A16	1	1	2	1	1	1	16	3	2	3	3	3	3	2	1	2	3
01-01-02-01-01-01-17.mp4	AV	Speech	Calm	Normal	Kids	R1	A17	1	1	2	1	1	1	17	2	9	1	1	2	1	2	2	3	1
01-01-02-01-01-01-18.mp4	AV	Speech	Calm	Normal	Kids	R1	A18	1	1	2	1	1	1	18	3	3	2	2	2	2	3	3	2	2
01-01-02-01-01-01-19.mp4	AV	Speech	Calm	Normal	Kids	R1	A19	1	1	2	1	1	1	19	2	2	3	3	3	3	3	2	3	3
01-01-02-01-01-01-20.mp4	AV	Speech	Calm	Normal	Kids	R1	A20	1	1	2	1	1	1	20	3	2	2	2	2	2	3	2	2	2
01-01-02-01-01-01-21.mp4	AV	Speech	Calm	Normal	Kids	R1	A21	1	1	2	1	1	1	21	1	2	1	2	7	2	5	7	2	5
01-01-02-01-01-01-22.mp4	AV	Speech	Calm	Normal	Kids	R1	A22	1	1	2	1	1	1	22	2	2	2	1	2	2	2	2	1	1
01-01-02-01-01-01-23.mp4	AV	Speech	Calm	Normal	Kids	R1	A23	1	1	2	1	1	1	23	2	2	2	2	1	1	1	2	2	2
01-01-02-01-01-01-24.mp4	AV	Speech	Calm	Normal	Kids	R1	A24	1	1	2	1	1	1	24	2	2	1	1	2	2	2	2	2	2
01-01-02-01-01-02-01.mp4	AV	Speech	Calm	Normal	Kids	R2	A1	1	1	2	1	1	2	1	2	2	2	2	2	1	1	2	2	1
01-01-02-01-01-02-02.mp4	AV	Speech	Calm	Normal	Kids	R2	A2	1	1	2	1	1	2	2	1	1	2	1	3	1	2	2	2	1
01-01-02-01-01-02-03.mp4	AV	Speech	Calm	Normal	Kids	R2	A3	1	1	2	1	1	2	3	4	7	3	4	2	4	9	4	7	2
01-01-02-01-01-02-04.mp4	AV	Speech	Calm	Normal	Kids	R2	A4	1	1	2	1	1	2	4	3	3	3	3	3	3	3	9	3	3
01-01-02-01-01-02-05.mp4	AV	Speech	Calm	Normal	Kids	R2	A5	1	1	2	1	1	2	5	3	2	2	2	3	2	2	2	3	2
01-01-02-01-01-02-06.mp4	AV	Speech	Calm	Normal	Kids	R2	A6	1	1	2	1	1	2	6	2	2	2	2	2	2	2	2	4	2
01-01-02-01-01-02-07.mp4	AV	Speech	Calm	Normal	Kids	R2	A7	1	1	2	1	1	2	7	2	3	1	3	2	2	2	2	3	1
01-01-02-01-01-02-08.mp4	AV	Speech	Calm	Normal	Kids	R2	A8	1	1	2	1	1	2	8	2	2	9	3	3	2	3	2	2	2
01-01-02-01-01-02-09.mp4	AV	Speech	Calm	Normal	Kids	R2	A9	1	1	2	1	1	2	9	2	1	2	2	1	2	3	1	2	2
01-01-02-01-01-02-10.mp4	AV	Speech	Calm	Normal	Kids	R2	A10	1	1	2	1	1	2	10	1	2	3	2	3	2	2	3	2	1
01-01-02-01-01-02-11.mp4	AV	Speech	Calm	Normal	Kids	R2	A11	1	1	2	1	1	2	11	3	2	2	3	2	2	3	1	2	1
01-01-02-01-01-02-12.mp4	AV	Speech	Calm	Normal	Kids	R2	A12	1	1	2	1	1	2	12	2	2	2	6	1	1	2	2	2	3
01-01-02-01-01-02-13.mp4	AV	Speech	Calm	Normal	Kids	R2	A13	1	1	2	1	1	2	13	7	1	2	1	1	1	1	1	9	1
01-01-02-01-01-02-14.mp4	AV	Speech	Calm	Normal	Kids	R2	A14	1	1	2	1	1	2	14	2	2	2	2	3	3	2	1	2	1
01-01-02-01-01-02-15.mp4	AV	Speech	Calm	Normal	Kids	R2	A15	1	1	2	1	1	2	15	9	2	2	2	9	2	1	2	4	2
01-01-02-01-01-02-16.mp4	AV	Speech	Calm	Normal	Kids	R2	A16	1	1	2	1	1	2	16	3	2	3	2	3	2	2	3	3	2
01-01-02-01-01-02-17.mp4	AV	Speech	Calm	Normal	Kids	R2	A17	1	1	2	1	1	2	17	2	1	1	1	3	2	1	1	1	1
01-01-02-01-01-02-18.mp4	AV	Speech	Calm	Normal	Kids	R2	A18	1	1	2	1	1	2	18	2	2	2	2	2	2	2	3	2	3
01-01-02-01-01-02-19.mp4	AV	Speech	Calm	Normal	Kids	R2	A19	1	1	2	1	1	2	19	2	2	2	3	3	3	2	3	3	3
01-01-02-01-01-02-20.mp4	AV	Speech	Calm	Normal	Kids	R2	A20	1	1	2	1	1	2	20	2	3	3	2	2	2	3	2	3	2
01-01-02-01-01-02-21.mp4	AV	Speech	Calm	Normal	Kids	R2	A21	1	1	2	1	1	2	21	1	1	1	1	2	2	1	2	2	1
01-01-02-01-01-02-22.mp4	AV	Speech	Calm	Normal	Kids	R2	A22	1	1	2	1	1	2	22	2	2	2	1	2	2	2	2	2	2
01-01-02-01-01-02-23.mp4	AV	Speech	Calm	Normal	Kids	R2	A23	1	1	2	1	1	2	23	2	1	1	2	2	2	1	2	2	1
01-01-02-01-01-02-24.mp4	AV	Speech	Calm	Normal	Kids	R2	A24	1	1	2	1	1	2	24	3	2	3	2	3	1	3	2	3	3
01-01-02-01-02-01-01.mp4	AV	Speech	Calm	Normal	Dogs	R1	A1	1	1	2	1	2	1	1	2	2	2	1	2	2	3	3	2	2
01-01-02-01-02-01-02.mp4	AV	Speech	Calm	Normal	Dogs	R1	A2	1	1	2	1	2	1	2	2	1	2	2	2	9	1	2	2	2
01-01-02-01-02-01-03.mp4	AV	Speech	Calm	Normal	Dogs	R1	A3	1	1	2	1	2	1	3	2	3	3	9	3	3	2	7	1	2
01-01-02-01-02-01-04.mp4	AV	Speech	Calm	Normal	Dogs	R1	A4	1	1	2	1	2	1	4	3	3	2	2	3	3	3	2	3	3
01-01-02-01-02-01-05.mp4	AV	Speech	Calm	Normal	Dogs	R1	A5	1	1	2	1	2	1	5	2	3	2	2	2	3	2	2	3	3
01-01-02-01-02-01-06.mp4	AV	Speech	Calm	Normal	Dogs	R1	A6	1	1	2	1	2	1	6	2	2	2	2	2	1	1	1	2	3
01-01-02-01-02-01-07.mp4	AV	Speech	Calm	Normal	Dogs	R1	A7	1	1	2	1	2	1	7	1	2	2	2	2	2	2	3	2	3
01-01-02-01-02-01-08.mp4	AV	Speech	Calm	Normal	Dogs	R1	A8	1	1	2	1	2	1	8	3	2	2	3	2	2	2	3	2	3
01-01-02-01-02-01-09.mp4	AV	Speech	Calm	Normal	Dogs	R1	A9	1	1	2	1	2	1	9	2	2	2	2	2	2	1	1	2	2
01-01-02-01-02-01-10.mp4	AV	Speech	Calm	Normal	Dogs	R1	A10	1	1	2	1	2	1	10	4	3	2	2	4	2	2	4	2	4
01-01-02-01-02-01-11.mp4	AV	Speech	Calm	Normal	Dogs	R1	A11	1	1	2	1	2	1	11	2	1	2	3	2	3	2	2	2	1
01-01-02-01-02-01-12.mp4	AV	Speech	Calm	Normal	Dogs	R1	A12	1	1	2	1	2	1	12	1	3	3	2	2	2	2	3	2	2
01-01-02-01-02-01-13.mp4	AV	Speech	Calm	Normal	Dogs	R1	A13	1	1	2	1	2	1	13	1	1	5	4	1	1	1	2	9	1
01-01-02-01-02-01-14.mp4	AV	Speech	Calm	Normal	Dogs	R1	A14	1	1	2	1	2	1	14	2	3	2	2	6	2	2	2	2	2
01-01-02-01-02-01-15.mp4	AV	Speech	Calm	Normal	Dogs	R1	A15	1	1	2	1	2	1	15	2	2	1	2	2	2	2	2	3	2
01-01-02-01-02-01-16.mp4	AV	Speech	Calm	Normal	Dogs	R1	A16	1	1	2	1	2	1	16	1	3	4	3	2	2	2	3	2	2
01-01-02-01-02-01-17.mp4	AV	Speech	Calm	Normal	Dogs	R1	A17	1	1	2	1	2	1	17	1	2	2	2	4	1	1	2	1	1
01-01-02-01-02-01-18.mp4	AV	Speech	Calm	Normal	Dogs	R1	A18	1	1	2	1	2	1	18	3	2	3	3	2	2	3	3	2	2
01-01-02-01-02-01-19.mp4	AV	Speech	Calm	Normal	Dogs	R1	A19	1	1	2	1	2	1	19	3	2	2	2	2	3	3	2	3	3
01-01-02-01-02-01-20.mp4	AV	Speech	Calm	Normal	Dogs	R1	A20	1	1	2	1	2	1	20	2	2	2	2	2	9	2	2	9	2
01-01-02-01-02-01-21.mp4	AV	Speech	Calm	Normal	Dogs	R1	A21	1	1	2	1	2	1	21	3	1	2	3	1	2	1	2	2	2
01-01-02-01-02-01-22.mp4	AV	Speech	Calm	Normal	Dogs	R1	A22	1	1	2	1	2	1	22	3	1	3	2	1	6	2	2	2	2
01-01-02-01-02-01-23.mp4	AV	Speech	Calm	Normal	Dogs	R1	A23	1	1	2	1	2	1	23	2	2	2	1	2	2	2	1	2	2
01-01-02-01-02-01-24.mp4	AV	Speech	Calm	Normal	Dogs	R1	A24	1	1	2	1	2	1	24	1	1	1	4	1	1	1	2	4	2
01-01-02-01-02-02-01.mp4	AV	Speech	Calm	Normal	Dogs	R2	A1	1	1	2	1	2	2	1	2	1	2	2	2	2	2	2	2	2
01-01-02-01-02-02-02.mp4	AV	Speech	Calm	Normal	Dogs	R2	A2	1	1	2	1	2	2	2	3	2	1	2	2	1	2	1	1	2
01-01-02-01-02-02-03.mp4	AV	Speech	Calm	Normal	Dogs	R2	A3	1	1	2	1	2	2	3	2	3	3	3	1	4	2	2	9	3
01-01-02-01-02-02-04.mp4	AV	Speech	Calm	Normal	Dogs	R2	A4	1	1	2	1	2	2	4	4	3	2	3	2	3	2	3	3	3
01-01-02-01-02-02-05.mp4	AV	Speech	Calm	Normal	Dogs	R2	A5	1	1	2	1	2	2	5	2	3	2	2	2	3	7	3	3	2
01-01-02-01-02-02-06.mp4	AV	Speech	Calm	Normal	Dogs	R2	A6	1	1	2	1	2	2	6	2	2	2	2	1	2	2	2	2	2
01-01-02-01-02-02-07.mp4	AV	Speech	Calm	Normal	Dogs	R2	A7	1	1	2	1	2	2	7	3	2	2	2	1	1	3	2	2	2
01-01-02-01-02-02-08.mp4	AV	Speech	Calm	Normal	Dogs	R2	A8	1	1	2	1	2	2	8	2	2	3	2	2	3	2	2	3	2
01-01-02-01-02-02-09.mp4	AV	Speech	Calm	Normal	Dogs	R2	A9	1	1	2	1	2	2	9	2	4	4	2	2	2	1	2	1	2
01-01-02-01-02-02-10.mp4	AV	Speech	Calm	Normal	Dogs	R2	A10	1	1	2	1	2	2	10	2	2	2	2	2	2	2	2	2	3
01-01-02-01-02-02-11.mp4	AV	Speech	Calm	Normal	Dogs	R2	A11	1	1	2	1	2	2	11	2	2	2	2	1	2	2	2	2	2
01-01-02-01-02-02-12.mp4	AV	Speech	Calm	Normal	Dogs	R2	A12	1	1	2	1	2	2	12	3	2	2	2	2	3	2	2	3	2
01-01-02-01-02-02-13.mp4	AV	Speech	Calm	Normal	Dogs	R2	A13	1	1	2	1	2	2	13	1	1	2	1	1	2	4	2	9	1
01-01-02-01-02-02-14.mp4	AV	Speech	Calm	Normal	Dogs	R2	A14	1	1	2	1	2	2	14	3	2	2	2	3	2	2	2	2	2
01-01-02-01-02-02-15.mp4	AV	Speech	Calm	Normal	Dogs	R2	A15	1	1	2	1	2	2	15	2	1	2	6	1	2	2	2	2	2
01-01-02-01-02-02-16.mp4	AV	Speech	Calm	Normal	Dogs	R2	A16	1	1	2	1	2	2	16	3	3	2	2	1	3	2	2	3	3
01-01-02-01-02-02-17.mp4	AV	Speech	Calm	Normal	Dogs	R2	A17	1	1	2	1	2	2	17	1	1	1	1	9	2	2	2	2	1
01-01-02-01-02-02-18.mp4	AV	Speech	Calm	Normal	Dogs	R2	A18	1	1	2	1	2	2	18	2	2	2	2	2	2	3	2	2	3
01-01-02-01-02-02-19.mp4	AV	Speech	Calm	Normal	Dogs	R2	A19	1	1	2	1	2	2	19	3	2	2	2	2	3	3	2	3	3
01-01-02-01-02-02-20.mp4	AV	Speech	Calm	Normal	Dogs	R2	A20	1	1	2	1	2	2	20	1	9	9	9	2	3	2	2	2	2
01-01-02-01-02-02-21.mp4	AV	Speech	Calm	Normal	Dogs	R2	A21	1	1	2	1	2	2	21	2	2	1	1	3	1	7	2	1	2
01-01-02-01-02-02-22.mp4	AV	Speech	Calm	Normal	Dogs	R2	A22	1	1	2	1	2	2	22	2	1	1	1	5	2	2	8	2	2
01-01-02-01-02-02-23.mp4	AV	Speech	Calm	Normal	Dogs	R2	A23	1	1	2	1	2	2	23	2	2	1	1	2	2	2	2	2	2
01-01-02-01-02-02-24.mp4	AV	Speech	Calm	Normal	Dogs	R2	A24	1	1	2	1	2	2	24	3	1	2	3	2	2	1	2	3	3
01-01-02-02-01-01-01.mp4	AV	Speech	Calm	Strong	Kids	R1	A1	1	1	2	2	1	1	1	2	2	2	2	2	3	3	3	2	2
01-01-02-02-01-01-02.mp4	AV	Speech	Calm	Strong	Kids	R1	A2	1	1	2	2	1	1	2	2	2	5	1	1	2	4	2	2	1
01-01-02-02-01-01-03.mp4	AV	Speech	Calm	Strong	Kids	R1	A3	1	1	2	2	1	1	3	7	9	7	7	2	9	7	7	4	7
01-01-02-02-01-01-04.mp4	AV	Speech	Calm	Strong	Kids	R1	A4	1	1	2	2	1	1	4	2	2	2	9	2	2	2	2	2	2
01-01-02-02-01-01-05.mp4	AV	Speech	Calm	Strong	Kids	R1	A5	1	1	2	2	1	1	5	3	2	3	3	3	3	3	2	2	2
01-01-02-02-01-01-06.mp4	AV	Speech	Calm	Strong	Kids	R1	A6	1	1	2	2	1	1	6	2	2	2	2	2	2	2	2	2	2
01-01-02-02-01-01-07.mp4	AV	Speech	Calm	Strong	Kids	R1	A7	1	1	2	2	1	1	7	3	2	2	2	3	2	2	2	2	2
01-01-02-02-01-01-08.mp4	AV	Speech	Calm	Strong	Kids	R1	A8	1	1	2	2	1	1	8	2	3	1	2	9	2	2	2	2	2
01-01-02-02-01-01-09.mp4	AV	Speech	Calm	Strong	Kids	R1	A9	1	1	2	2	1	1	9	2	2	3	2	2	2	4	2	9	2
01-01-02-02-01-01-10.mp4	AV	Speech	Calm	Strong	Kids	R1	A10	1	1	2	2	1	1	10	2	3	2	2	3	2	2	2	2	2
01-01-02-02-01-01-11.mp4	AV	Speech	Calm	Strong	Kids	R1	A11	1	1	2	2	1	1	11	2	2	2	6	1	3	1	2	2	2
01-01-02-02-01-01-12.mp4	AV	Speech	Calm	Strong	Kids	R1	A12	1	1	2	2	1	1	12	2	2	2	2	2	2	2	2	2	2
01-01-02-02-01-01-13.mp4	AV	Speech	Calm	Strong	Kids	R1	A13	1	1	2	2	1	1	13	1	2	2	3	3	1	1	2	1	1
01-01-02-02-01-01-14.mp4	AV	Speech	Calm	Strong	Kids	R1	A14	1	1	2	2	1	1	14	2	2	3	2	2	2	2	2	2	2
01-01-02-02-01-01-15.mp4	AV	Speech	Calm	Strong	Kids	R1	A15	1	1	2	2	1	1	15	1	2	1	2	2	2	2	1	2	2
01-01-02-02-01-01-16.mp4	AV	Speech	Calm	Strong	Kids	R1	A16	1	1	2	2	1	1	16	2	1	3	3	2	3	3	2	3	3
01-01-02-02-01-01-17.mp4	AV	Speech	Calm	Strong	Kids	R1	A17	1	1	2	2	1	1	17	2	2	2	1	2	2	2	8	2	2
01-01-02-02-01-01-18.mp4	AV	Speech	Calm	Strong	Kids	R1	A18	1	1	2	2	1	1	18	2	2	2	2	2	2	2	2	2	2
01-01-02-02-01-01-19.mp4	AV	Speech	Calm	Strong	Kids	R1	A19	1	1	2	2	1	1	19	2	3	3	3	2	3	3	3	3	3
01-01-02-02-01-01-20.mp4	AV	Speech	Calm	Strong	Kids	R1	A20	1	1	2	2	1	1	20	3	3	3	2	3	2	2	2	2	9
01-01-02-02-01-01-21.mp4	AV	Speech	Calm	Strong	Kids	R1	A21	1	1	2	2	1	1	21	2	1	2	2	2	2	3	2	2	2
01-01-02-02-01-01-22.mp4	AV	Speech	Calm	Strong	Kids	R1	A22	1	1	2	2	1	1	22	2	3	2	2	2	3	3	2	2	2
01-01-02-02-01-01-23.mp4	AV	Speech	Calm	Strong	Kids	R1	A23	1	1	2	2	1	1	23	2	2	2	2	2	2	2	2	2	2
01-01-02-02-01-01-24.mp4	AV	Speech	Calm	Strong	Kids	R1	A24	1	1	2	2	1	1	24	3	3	3	2	2	2	2	3	3	2
01-01-02-02-01-02-01.mp4	AV	Speech	Calm	Strong	Kids	R2	A1	1	1	2	2	1	2	1	2	2	3	2	2	2	2	2	2	2
01-01-02-02-01-02-02.mp4	AV	Speech	Calm	Strong	Kids	R2	A2	1	1	2	2	1	2	2	2	2	2	1	1	2	2	1	2	1
01-01-02-02-01-02-03.mp4	AV	Speech	Calm	Strong	Kids	R2	A3	1	1	2	2	1	2	3	4	2	4	3	9	4	2	7	4	4
01-01-02-02-01-02-04.mp4	AV	Speech	Calm	Strong	Kids	R2	A4	1	1	2	2	1	2	4	2	3	3	3	3	3	3	9	3	3
01-01-02-02-01-02-05.mp4	AV	Speech	Calm	Strong	Kids	R2	A5	1	1	2	2	1	2	5	9	9	2	2	2	4	2	2	2	2
01-01-02-02-01-02-06.mp4	AV	Speech	Calm	Strong	Kids	R2	A6	1	1	2	2	1	2	6	2	2	2	2	2	2	2	2	2	2
01-01-02-02-01-02-07.mp4	AV	Speech	Calm	Strong	Kids	R2	A7	1	1	2	2	1	2	7	2	3	5	1	2	2	1	2	2	2
01-01-02-02-01-02-08.mp4	AV	Speech	Calm	Strong	Kids	R2	A8	1	1	2	2	1	2	8	2	2	2	2	2	2	2	2	2	2
01-01-02-02-01-02-09.mp4	AV	Speech	Calm	Strong	Kids	R2	A9	1	1	2	2	1	2	9	9	2	2	2	2	2	2	9	9	2
01-01-02-02-01-02-10.mp4	AV	Speech	Calm	Strong	Kids	R2	A10	1	1	2	2	1	2	10	2	2	2	2	1	2	2	2	2	2
01-01-02-02-01-02-11.mp4	AV	Speech	Calm	Strong	Kids	R2	A11	1	1	2	2	1	2	11	2	3	2	2	2	8	3	3	2	2
01-01-02-02-01-02-12.mp4	AV	Speech	Calm	Strong	Kids	R2	A12	1	1	2	2	1	2	12	2	2	2	2	2	9	1	2	2	2
01-01-02-02-01-02-13.mp4	AV	Speech	Calm	Strong	Kids	R2	A13	1	1	2	2	1	2	13	1	1	9	2	9	1	2	2	1	3
01-01-02-02-01-02-14.mp4	AV	Speech	Calm	Strong	Kids	R2	A14	1	1	2	2	1	2	14	2	3	2	3	2	3	2	3	3	2
01-01-02-02-01-02-15.mp4	AV	Speech	Calm	Strong	Kids	R2	A15	1	1	2	2	1	2	15	2	2	2	2	2	2	2	2	1	2
[truncated: 4,089 more rows]

## Sheet: Song_EmoCategory
	Independent Variables														Dependent Variables
[truncated: 3,038 more rows]

[truncated: 4 more sheets: Speech_Intensity, Song_Intensity, Speech_Genuineness, Song_Genuineness]
